# Supplementary material for: Global Lysine Acetylome Analysis of LPS-Stimulated HepG2 Cells Identified Hyperacetylation of PKM2 as a Metabolic Regulator in Sepsis
Source: MDPI journal article supplement (doi:10.3390/ijms22168529), 2021-08-08
Supplement: s1 [file s1]

## Supplemental information

### **Global lysine acetylome analysis of LPS-stimulated HepG2 cells identified hyperacetylation of PKM2 as a metabolic regulator in sepsis**

Ann-Yae Na<sup>1</sup>, Sanjita Paudel<sup>1</sup>, Soyoung Choi<sup>1</sup>, Jun Hyung Lee<sup>2</sup>, Min-Sik Kim<sup>2</sup>, Jong-Sup Bae<sup>1</sup>, Sangkyu Lee<sup>1,\*</sup>

<sup>1</sup>BK21 FOUR Community-Based Intelligent Novel Drug Discovery Education Unit, College of Pharmacy and Research Institute of Pharmaceutical Sciences, Kyungpook National University, Daegu 41566, Republic of Korea

<sup>2</sup>Department of New Biology, DGIST, Daegu, 42988, Republic of Korea

**\*Corresponding Author:** Sangkyu Lee, Ph.D., Associate Professor, College of Pharmacy, Kyungpook National University, Daegu 41566, Republic of Korea, E-mail, [sangkyu@knu.ac.kr](mailto:sangkyu@knu.ac.kr); Phone, +82 53 950 8571; Fax, +82 53 950 8557

## **Legend of Tables**

**Table S1.** List of all the identified proteins

**Table S2.** Protein list in Clusters 1-5

**Table S3.** All identified list of acetylated peptides

**Table S4.** The primer information of SIRT 1-7

**Table S5.** The antibody information of SIRT 1-7

## Legend of Figures

**Figure S1.** The level of inflammatory factors (A) and SIRT 1-7 (B) determined using Western blotting.

HepG2 cells were incubated with LPS (1  $\mu\text{g/mL}$ ) for different durations.

**Figure S2.** Overview of global proteomics analysis from sepsis-induced liver dysfunction (SILD) *in vitro* (A) The number of identified protein and quantified proteins and DEPs of group (B) Venn

diagram of protein quantification in triplicate analyzing results of the LPS 6 h (left) and the 24 h (right) groups compared with that of the control group.

**Figure S3.** Correlation analysis of experimental results with report ion ratios among biological triplicate samples in sepsis-induced liver dysfunction (SILD) *in vitro*.

**Figure S4.** Protein expression dynamic clusters based on global protein expression patterns at each stage of sepsis-induced liver dysfunction (SILD) *in vitro*. The functional GO and KEGG were shown at each cluster.

**Figure S5.** Characterization of lysine acetylation (Kac) in SILD *in vitro*. (A) Distribution of lysine acetylation (Kac) sites per protein. (B) Correlation of biological duplicate by intensity ratio in Kac. (C) Functional enrichment of gene ontology (GO).

**Figure S6.** The proteins interaction network with a strong interaction (highest confidence 0.09) among the associated in glycolysis pathway.

**Figure S7.** Validation of comparative proteome analysis using Western blotting. Western blot analysis for PKM2 protein ex-pression (A). The PKM and PKM acetylation levels were determined using Western blotting after immunoprecipitation using an anti-PKM antibody (B).

**A**

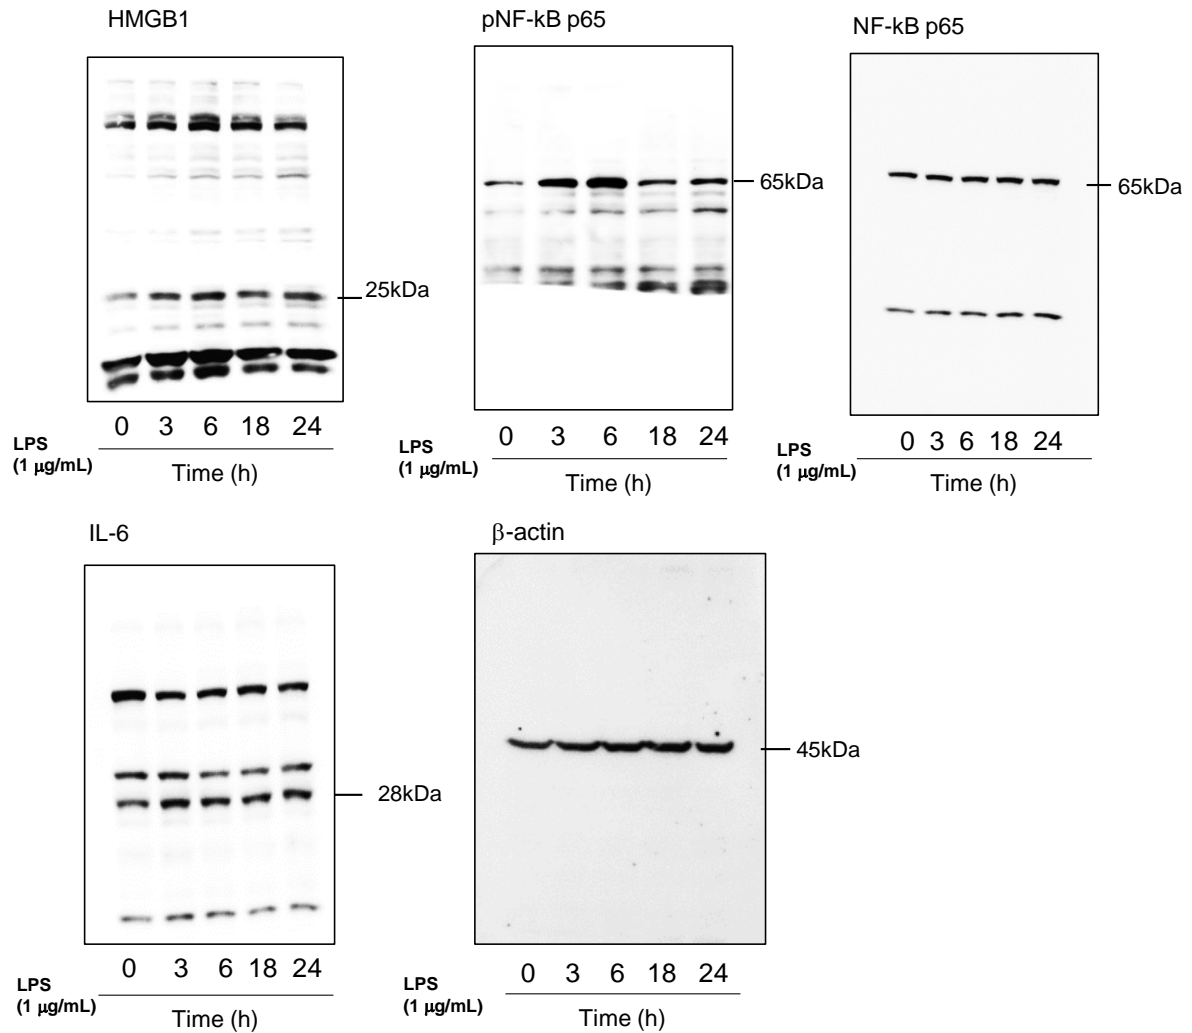

**Figure S1.** The level of inflammatory factors (A) and SIRT 1-7 (B) determined using Western blotting.

HepG2 cells were incubated with LPS (1 μg/mL) for different durations (continued).

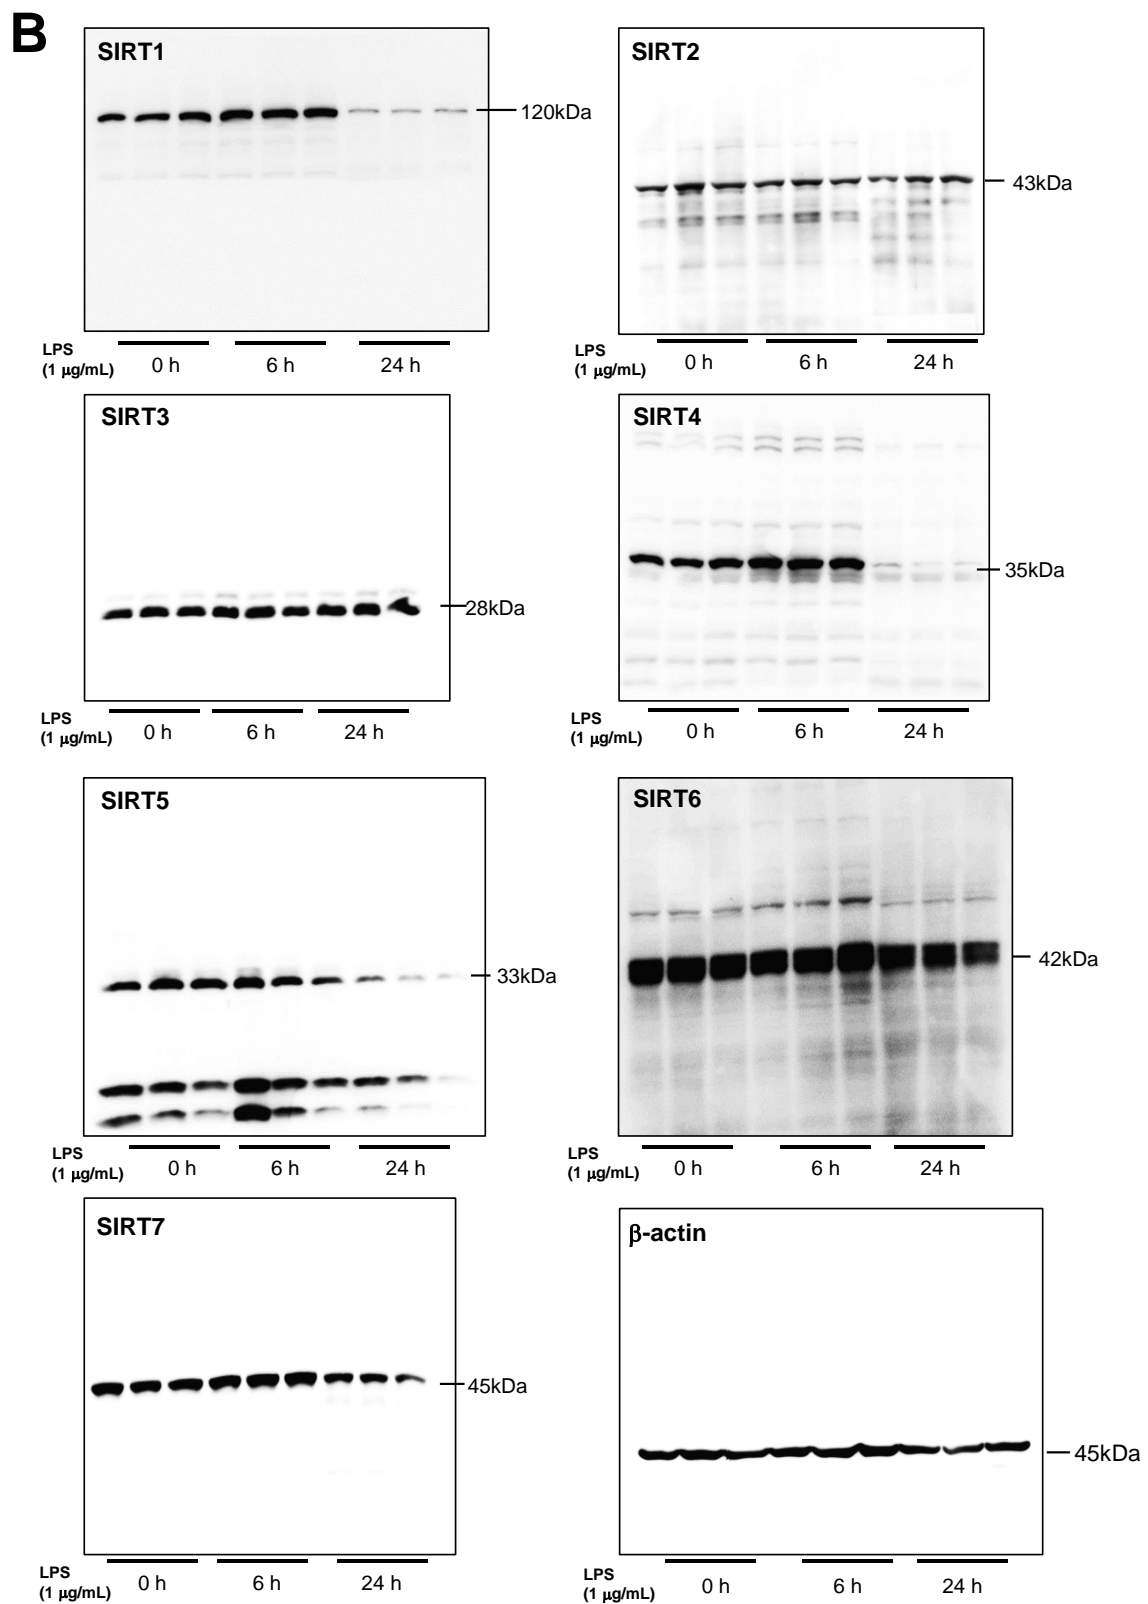

**Figure S1.** The level of inflammatory factors (A) and SIRT 1-7 (B) determined using Western blotting.

HepG2 cells were incubated with LPS (1  $\mu$ g/mL) for different durations (continued).

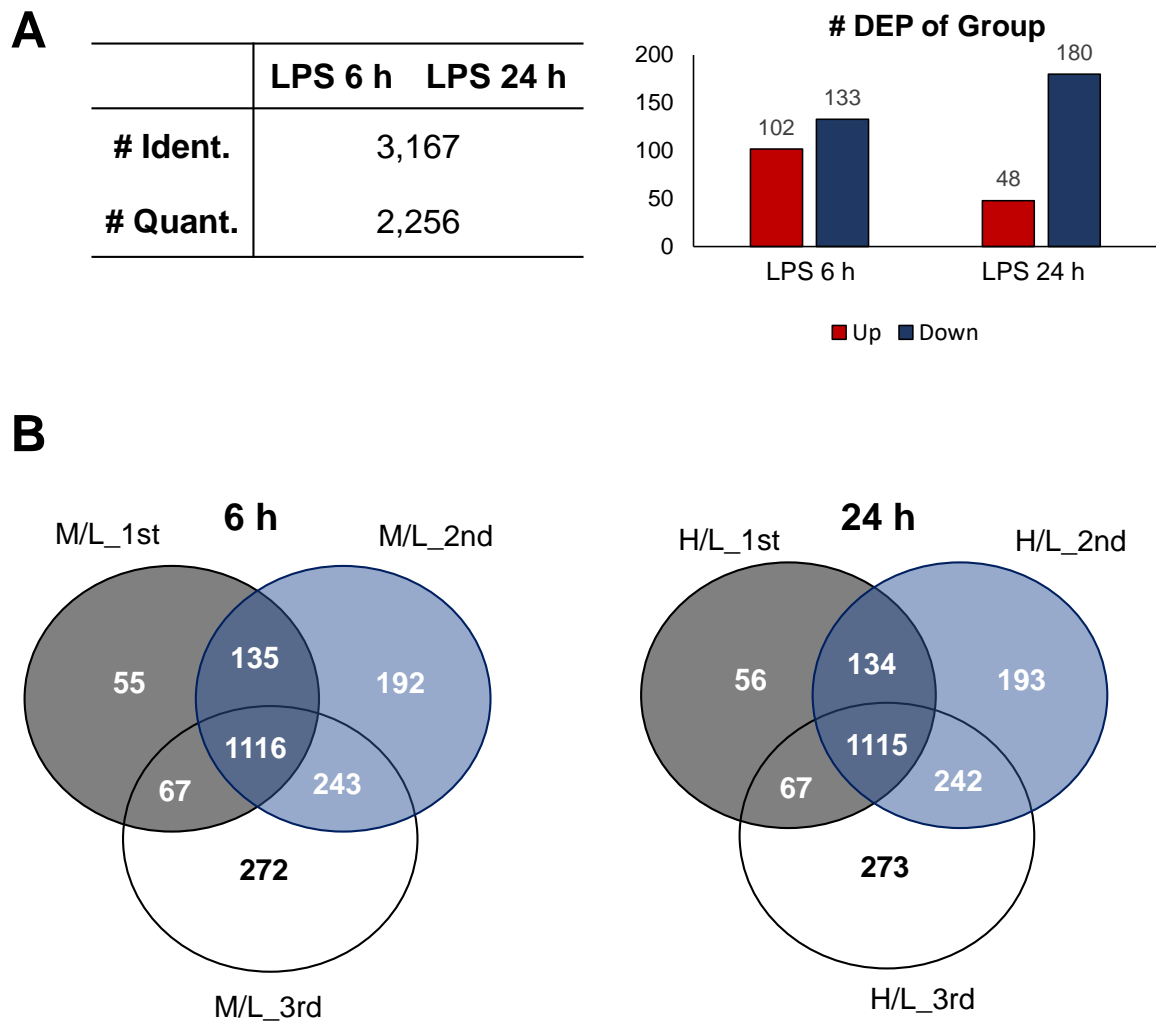

**Figure S2.** Overview of global proteomics analysis from sepsis-induced liver dysfunction (SILD) *in vitro* (A) The number of identified protein and quantified proteins and DEPs of group (B) Venn diagram of protein quantification in triplicate analyzing results of the LPS 6 h (left) and the 24 h (right) groups compared with that of the control group.

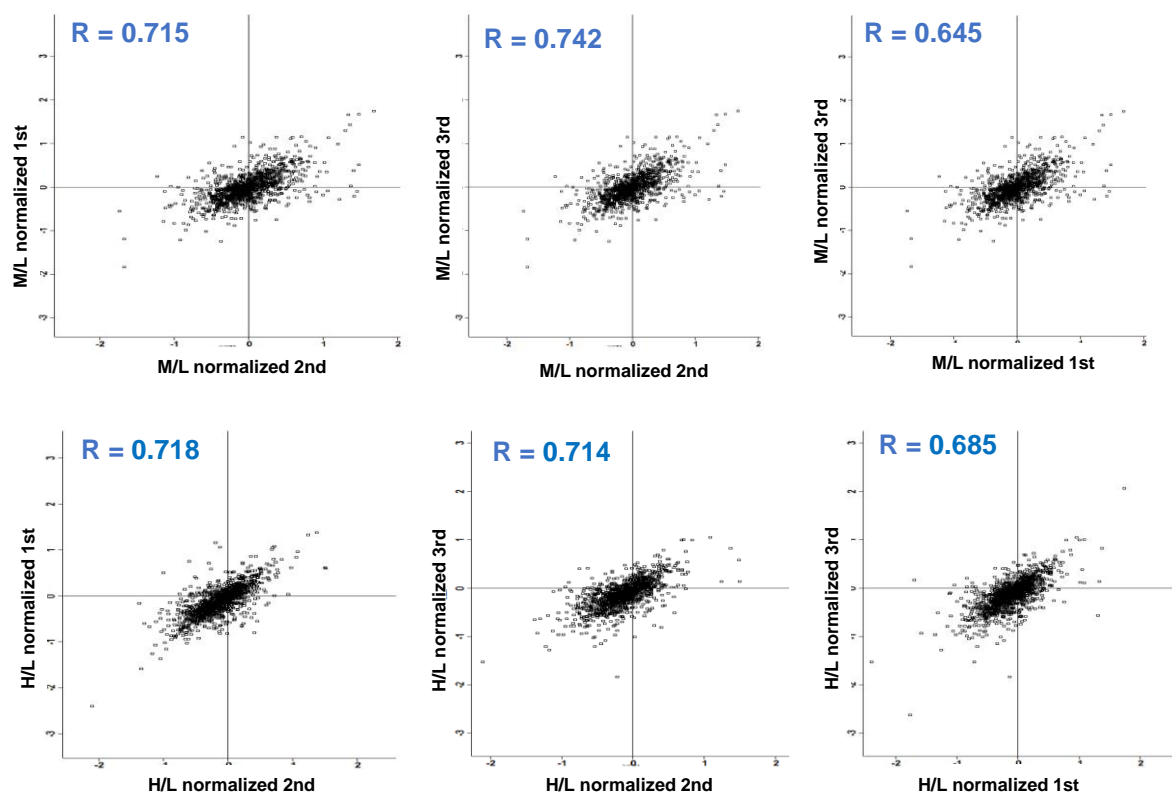

**Figure S3.** Correlation analysis of experimental results with report ion ratios among biological triplicate samples in sepsis-induced liver dysfunction (SILD) *in vitro*.

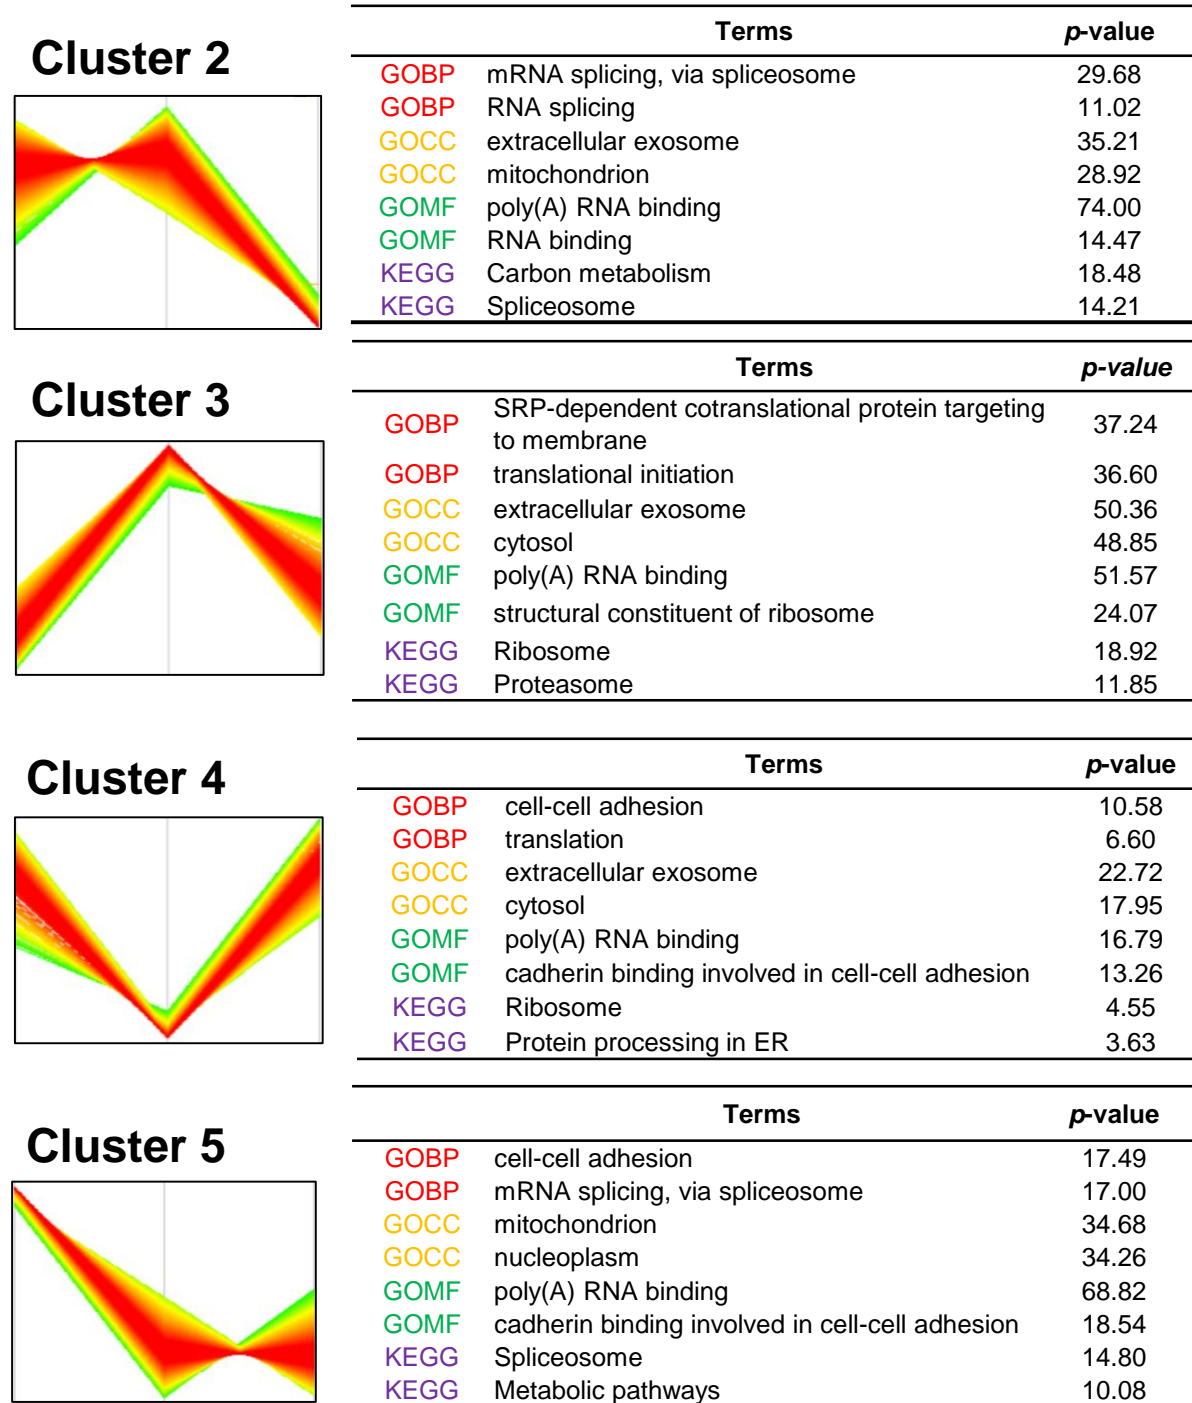

**Figure S4.** Protein expression dynamic clusters based on global protein expression patterns at each stage of sepsis-induced liver dysfunction (SILD) *in vitro*. The functional GO and KEGG were shown at each cluster.



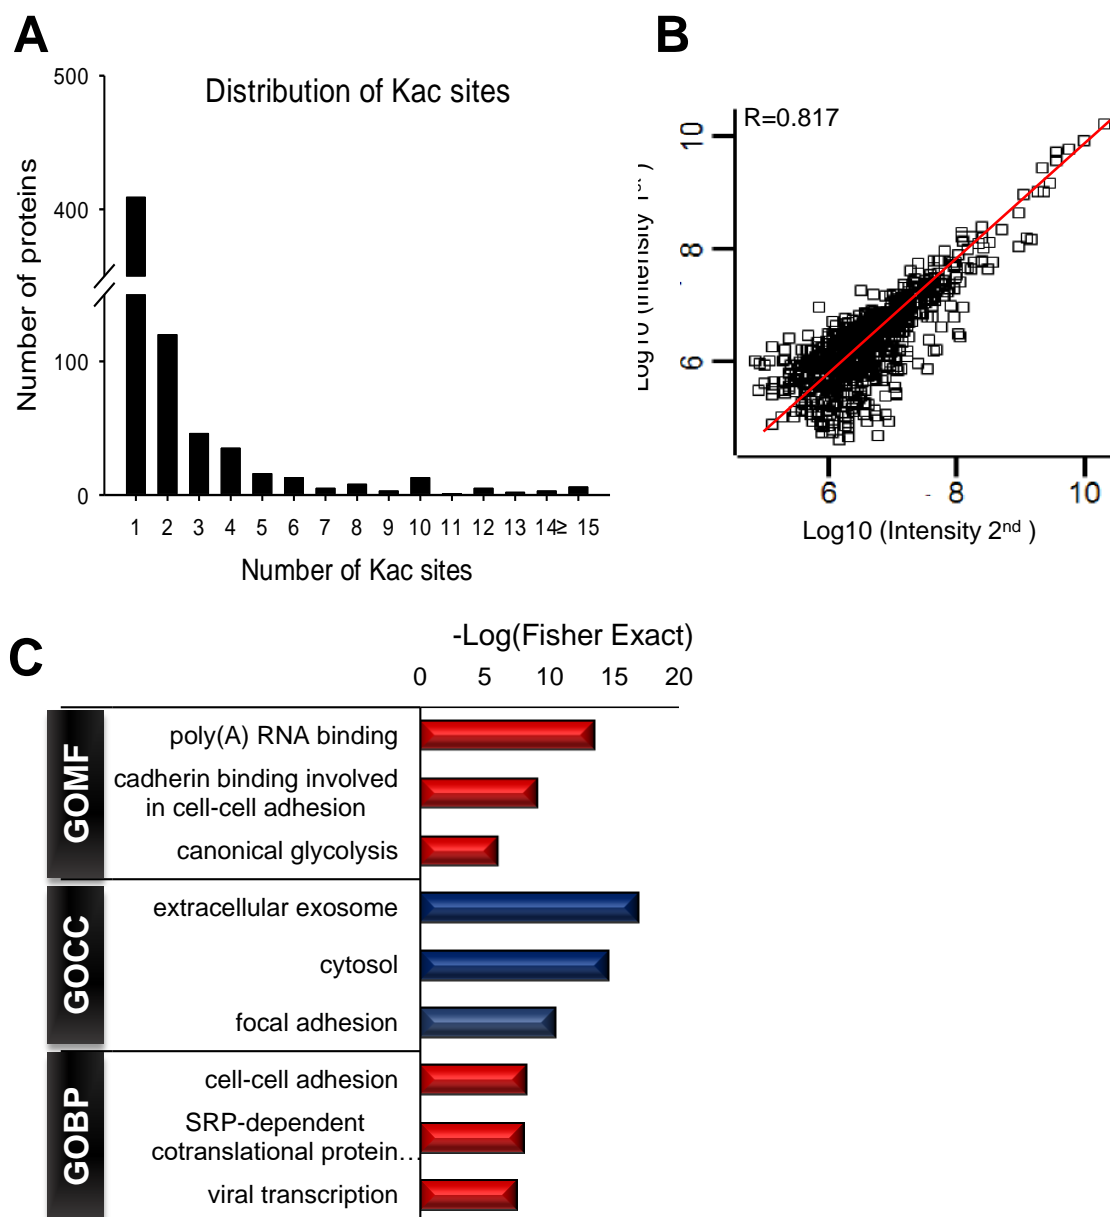

**Figure S5.** Characterization of lysine acetylation (Kac) in SILD *in vitro*. (A) Distribution of lysine acetylation (Kac) sites per protein. (B) Correlation of biological duplicate by intensity ratio in Kac. (C) Functional enrichment of gene ontology (GO).

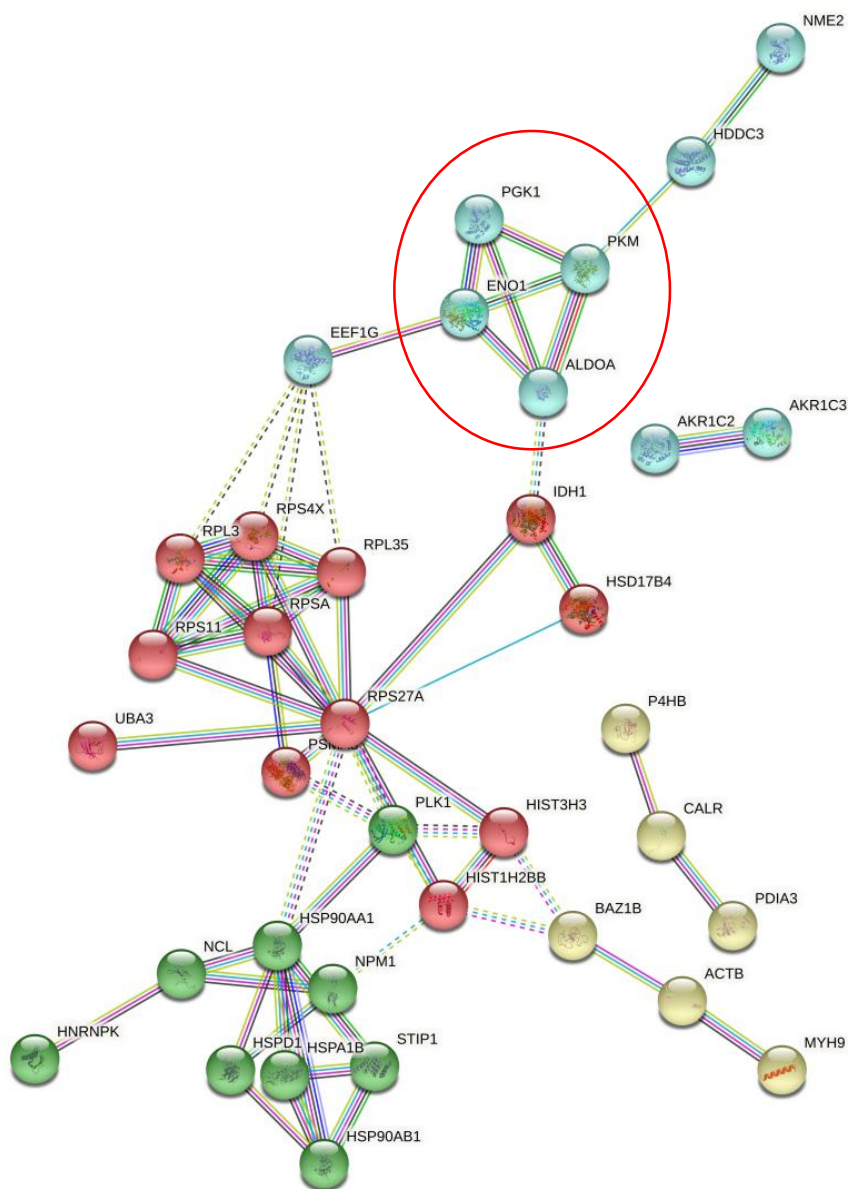

**Figure S6.** The proteins interaction network with a strong interaction (highest confidence 0.09) among the associated in glycolysis pathway.

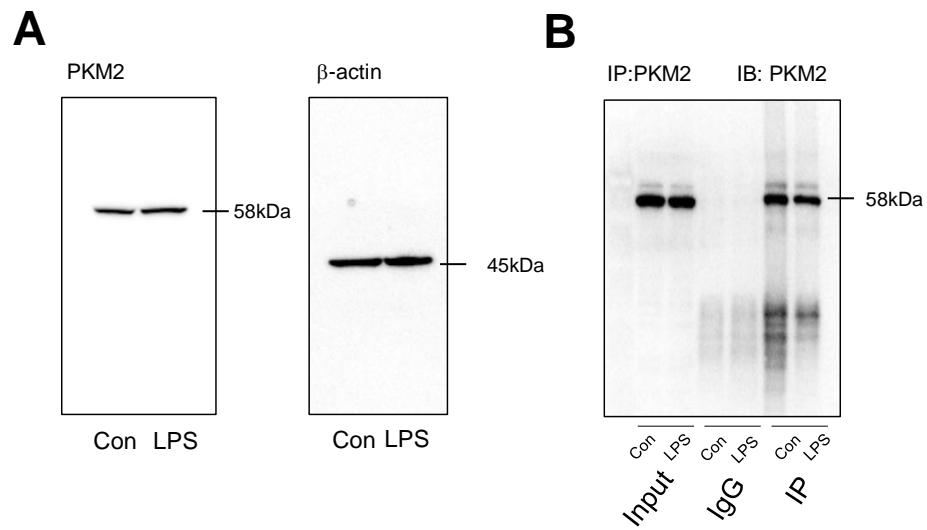

**Figure S7.** Validation of comparative proteome analysis using Western blotting. Western blot analysis for PKM2 protein ex-pression (A). The PKM and PKM acetylation levels were determined using Western blotting after immunoprecipitation using an anti-PKM antibody (B).

**Table S4.** The primer information of SIRT 1-7

| Gene    | Forward                | Reverse                    | Accession No. |
|---------|------------------------|----------------------------|---------------|
| SIRT1   | GAGCTGGGGTGTCTGTTTCA   | GGAAGTCTACAGCAAGGCGA       | NM_012238.5   |
| SIRT2   | CCTCCTCCTGGTCATGGGTA   | CGAGGCCCATCATCCCC          | NM_012237.4   |
| SIRT3   | CCCAGTGGCATTCCAGACTT   | AGGGCTTGGGGTTGTGAAA        | NM_012239.6   |
| SIRT4   | CTCGAAAGCCTCCATTGGGT   | CTGGTATCCCCGATTTCGGTG      | NM_012240.2   |
| SIRT5   | TCAGGGGTTACAGAATGG     | ACCTTACCCCTACCCCATCC       | NM_012241.5   |
| SIRT6   | GCAGTCTTCCAGTGTGGTGT   | GCTCTCAAAGGTGGTGTCTGA      | NM_016539.4   |
| SIRT7   | CAGGTGGCAGGATCCCATT    | CCTCCTCTCTGCTTCTGCAC       | NM_016538.3   |
| β-actin | AATCTGGCACCACACCTTCTAC | ATAGCACAGCCTGGATAGCA<br>AC | NM_001101.5   |

**Table S5.** The antibody information of SIRT 1-7

| Protein | Cat. No.     | Protein   | Cat. No.                   | Protein | Cat. No. |
|---------|--------------|-----------|----------------------------|---------|----------|
| SIRT1   | CST #3931    | PKM2      | Proteintech<br>#15822-1-AO | Kglu    | PTM-1151 |
| SIRT2   | CST #12672   | HMGB1     | Abcam 79823                | Kbut    | PTM-301  |
| SIRT3   | CST #5490    | IL-6      | CST #12153                 | Klac    | PTM-1401 |
| SIRT4   | Abcam 231137 | NFκB P65  | CST #4764                  | Kben    | PTM-762  |
| SIRT5   | Abcam 154082 | pNFκB p65 | CST #3303                  | Kcro    | PTM-502  |
| SIRT6   | CST #12486S  | Kac       | PTM-101                    | Kpro    | PTM-201  |
| SIRT7   | CST #5360S   | Ksu       | PTM-401                    |         |          |
| β-actin | CST #4967    | Kmal      | PTM-901                    |         |          |
