# Supplementary material for: Global Lysine Acetylome Analysis of LPS-Stimulated HepG2 Cells Identified Hyperacetylation of PKM2 as a Metabolic Regulator in Sepsis
Source: Int J Mol Sci. 2021 Aug 8;22(16):8529. doi: 10.3390/ijms22168529 (PMC8395202; doi:10.3390/ijms22168529)
Supplement: Supplementary file 1 [file ijms-22-08529-s001.zip]

Archive with 5 entries (4 files):
- ijms-1283398 suppl/
- ijms-1283398 suppl/Supplemental inform_proof revision.pdf
- ijms-1283398 suppl/Table S1. List of all the identified proteins.xlsx
- ijms-1283398 suppl/Table S2. Global proteome_clustering.xlsx
- ijms-1283398 suppl/Table S3. All identified list of acetylated peptides.xlsx
