# Supplementary material for: Global Lysine Acetylome Analysis of LPS-Stimulated HepG2 Cells Identified Hyperacetylation of PKM2 as a Metabolic Regulator in Sepsis
Source: Int J Mol Sci. 2021 Aug 8;22(16):8529. doi: 10.3390/ijms22168529 (PMC8395202; doi:10.3390/ijms22168529)
Supplement: Supplementary file 1 [file ijms-22-08529-s001.zip › ijms-1283398 suppl/Table S1. List of all the identified proteins.xlsx]

## Sheet: Quantified
Table S1. List of all the identified proteins
							(LPS 6 h/ 0 h)			(LPS 24 h/ 0 h)
Protein IDs	Protein name	Gene name	Number of proteins	Peptides	Sequence coverage [%]	Mol. weight [kDa]	Protein ratio	Ratio variability [%]	Ratio count	Protein ratio	Ratio variability [%]	Ratio count	id	Best MS/MS
A0A0C4DG79	Constitutive coactivator of PPAR-gamma-like protein 1 (Fragment)	FAM120A	2	3	8.5	54.193	0.062341	23.885	4	0.10997	8.0818	4	2904	40179
P09210	Glutathione S-transferase A2 (EC 2.5.1.18) (GST HA subunit 2) (GST class-alpha member 2) (GST-gamma) (GSTA2-2) (GTH2)	GSTA2	6	7	22.5	25.664	0.8309	32.843	3	0.17118	18.292	3	606	10973
P14635	G2/mitotic-specific cyclin-B1	CCNB1	3	2	5.8	48.337	0.16573	101.67	6	0.18036	43.379	6	719	14476
Q9Y2W2	WW domain-binding protein 11 (WBP-11) (Npw38-binding protein) (NpwBP) (SH3 domain-binding protein SNP70) (Splicing factor that interacts with PQBP-1 and PP1)	WBP11	2	4	9.2	69.997	0.16268	0.0060235	2	0.21025	1.7352	2	3090	19519
Q9BYN0	Sulfiredoxin-1 (EC 1.8.98.2)	SRXN1	1	2	13.9	14.259	0.19875	44.247	3	0.21529	20.985	3	2649	134747
C9JXF9	Insulin-like growth factor-binding protein 1	IGFBP1	3	6	30.7	27.671	0.27924	19.54	10	0.22311	44.136	10	616	13930
Q96K17	Transcription factor BTF3 homolog 4 (Basic transcription factor 3-like 4)	BTF3L4	1	1	19	17.27	0.53565	2.1631	2	0.26338	0.48518	2	2453	17944
J3KMX2	SWI/SNF-related matrix-associated actin-dependent regulator of chromatin subfamily D member 2	SMARCD2	5	3	7.9	52.238	0.30988	133.01	2	0.29887	127.21	2	2342	121388
P20645	Cation-dependent mannose-6-phosphate receptor (CD Man-6-P receptor) (CD-MPR) (46 kDa mannose 6-phosphate receptor) (MPR 46)	M6PR	4	2	12.6	30.993	0.53726	100.3	2	0.30942	75.372	2	804	74974
Q8NCU7	C2 calcium-dependent domain-containing protein 4A (Nuclear-localized factor 1) (Protein FAM148A)	C2CD4A	1	1	3	39.743	0.31238	3.5507	2	0.32728	24.019	2	2205	111820
C9JDF5	Carbohydrate-responsive element-binding protein (Fragment)	MLXIPL	3	1	7	23.077	0.673	2.8639	2	0.3485	15.892	2	2777	7803
P67809	Y-box-binding protein 1 (YB-1) (CCAAT-binding transcription factor I subunit A) (CBF-A) (DNA-binding protein B) (DBPB) (Enhancer factor I subunit A) (EFI-A) (Nuclease-sensitive element-binding protein 1) (Y-box transcription factor)	YBX1	4	10	36.7	35.924	1.1419	30.168	5	0.3505	53.864	4	1438	42789
P32929	Cystathionine gamma-lyase (EC 4.4.1.1) (Cysteine-protein sulfhydrase) (Gamma-cystathionase)	CTH	1	2	6.4	44.508	0.62021	2.3396	2	0.36198	38.985	2	971	26524
Q15056	Eukaryotic translation initiation factor 4H (eIF-4H) (Williams-Beuren syndrome chromosomal region 1 protein)	EIF4H	1	5	21.8	27.385	0.81705	43.895	13	0.39757	63.353	13	1773	4579
Q9NQT8	Kinesin-like protein KIF13B (Kinesin-like protein GAKIN)	KIF13B	3	2	1.9	202.79	0.36726	134.25	2	0.39774	134.35	2	2802	137081
A0A087WVW8	Sodium-coupled neutral amino acid transporter 3 (Fragment)	SLC38A3	4	2	35.4	10.275	0.42992	17.256	2	0.40008	11.626	2	2523	79385
P50895	Basal cell adhesion molecule (Auberger B antigen) (B-CAM cell surface glycoprotein) (F8/G253 antigen) (Lutheran antigen) (Lutheran blood group glycoprotein) (CD antigen CD239)	BCAM	3	9	23.9	67.404	0.55292	24.043	12	0.41993	9.9542	12	1192	44233
Q92466	DNA damage-binding protein 2 (DDB p48 subunit) (DDBb) (Damage-specific DNA-binding protein 2) (UV-damaged DNA-binding protein 2) (UV-DDB 2)	DDB2	4	2	6.6	47.863	0.65732	7.7302	4	0.43579	13.333	4	2292	23639
Q9Y6H1	Coiled-coil-helix-coiled-coil-helix domain-containing protein 2 (Aging-associated gene 10 protein) (HCV NS2 trans-regulated protein) (NS2TP)	CHCHD2	2	1	18.5	15.512	0.48457	9.2017	2	0.44109	31.311	2	1934	2321
P06756	Integrin alpha-V (Vitronectin receptor) (Vitronectin receptor subunit alpha) (CD antigen CD51) [Cleaved into: Integrin alpha-V heavy chain; Integrin alpha-V light chain]	ITGAV	1	3	6.1	116.04	0.42212	43.586	3	0.45438	60.402	3	575	55798
C9JQV0	Uncharacterized protein C7orf50 (Fragment)	C7orf50	4	3	29.7	21.883	0.64294	121.04	2	0.45636	60	2	2565	20145
Q9NYV4	Cyclin-dependent kinase 12 (EC 2.7.11.22) (EC 2.7.11.23) (Cdc2-related kinase, arginine/serine-rich) (CrkRS) (Cell division cycle 2-related protein kinase 7) (CDC2-related protein kinase 7) (Cell division protein kinase 12) (hCDK12)	CDK12	1	3	3.8	164.15	0.74493	13.73	2	0.45767	25.327	2	2898	107428
H0YG47	Protein quaking (Fragment)	QKI	8	5	32.4	25.789	0.69495	24.81	5	0.45937	31.06	5	2477	89349
Q92597	Protein NDRG1 (Differentiation-related gene 1 protein) (DRG-1) (N-myc downstream-regulated gene 1 protein) (Nickel-specific induction protein Cap43) (Reducing agents and tunicamycin-responsive protein) (RTP) (Rit42)	NDRG1	11	3	14	42.835	0.5593	16.218	4	0.46805	35.996	4	2307	48645
G3V0E5	Transferrin receptor protein 1	TFRC	2	7	10.9	75.963	0.63522	39.849	14	0.47487	31.059	13	521	113808
Q68CK6	Acyl-coenzyme A synthetase ACSM2B, mitochondrial (EC 6.2.1.2) (Acyl-CoA synthetase medium-chain family member 2B) (Benzoate--CoA ligase) (EC 6.2.1.25) (Butyrate--CoA ligase 2B) (Butyryl-coenzyme A synthetase 2B) (Middle-chain acyl-CoA synthetase 2B) (Xenobiotic/medium-chain fatty acid-CoA ligase HXM-A)	ACSM2B	11	4	10.9	64.271	0.93205	30.64	3	0.47669	30.26	3	1962	11821
Q8NFH5	Nucleoporin NUP35 (35 kDa nucleoporin) (Mitotic phosphoprotein 44) (MP-44) (Nuclear pore complex protein Nup53) (Nucleoporin NUP53)	NUP35	5	4	26.7	34.773	0.64821	12.363	4	0.47911	25.591	4	2222	27126
Q9UF12	Hydroxyproline dehydrogenase (HYPDH) (EC 1.5.5.3) (Kidney and liver proline oxidase 1) (HsPOX1) (Probable proline dehydrogenase 2) (EC 1.5.5.2) (Probable proline oxidase 2)	PRODH2	2	4	16.4	58.87	0.65045	6.3124	3	0.48029	48.233	3	2959	24083
P02795	Metallothionein-2 (MT-2) (Metallothionein-2A) (Metallothionein-II) (MT-II)	MT2A	2	2	52.5	6.0422	1.2118	17.922	5	0.48592	38.163	5	525	138261
Q86WA6	Valacyclovir hydrolase (VACVase) (Valacyclovirase) (EC 3.1.-.-) (Biphenyl hydrolase-like protein) (Biphenyl hydrolase-related protein) (Bph-rp) (Breast epithelial mucin-associated antigen) (MCNAA)	BPHL	1	2	8.6	32.542	0.62274	1.195	3	0.488	36.681	3	2100	107503
D6RBD7	Eukaryotic translation elongation factor 1 epsilon-1 (HCG15559, isoform CRA_d)	EEF1E1	4	2	24	16.686	1.0104	20.64	7	0.48943	14.668	7	233	298
Q5LJA5	Ubiquitin carboxyl-terminal hydrolase (EC 3.4.19.12)	UCHL5	8	4	21.7	40.423	1.0145	10.153	2	0.49085	37.656	2	3279	44727
P10412	Histone H1.4 (Histone H1b) (Histone H1s-4)	H1-4	1	13	36.1	21.865	0.65328	6.7145	3	0.50711	11.219	3	650	12336
P23141	Liver carboxylesterase 1 (Acyl-coenzyme A:cholesterol acyltransferase) (ACAT) (Brain carboxylesterase hBr1) (Carboxylesterase 1) (CE-1) (hCE-1) (EC 3.1.1.1) (Cholesteryl ester hydrolase) (CEH) (EC 3.1.1.13) (Cocaine carboxylesterase) (Egasyn) (HMSE) (Methylumbelliferyl-acetate deacetylase 1) (EC 3.1.1.56) (Monocyte/macrophage serine esterase) (Retinyl ester hydrolase) (REH) (Serine esterase 1) (T…	CES1	6	21	43.6	62.52	1.2891	41.475	55	0.50891	30.691	55	840	9194
H7C1G6	Autophagy-related protein 9 (Fragment)	ATG9A	3	1	5.7	26.759	0.59519	10.264	2	0.51028	20.325	2	2057	166456
H0YDK8	Pumilio homolog 1 (Fragment)	PUM1	9	2	3.3	95.696	0.7794	3.2942	2	0.51458	0.80486	2	1733	37494
O75891	Cytosolic 10-formyltetrahydrofolate dehydrogenase (10-FTHFDH) (FDH) (EC 1.5.1.6) (Aldehyde dehydrogenase family 1 member L1)	ALDH1L1	4	10	17.6	98.828	0.85325	29.211	6	0.51462	29.537	6	374	16780
V9GYP6	Cytochrome P450 4F11	CYP4F11	7	1	6.5	22.831	0.44109	0.4764	2	0.5176	14.778	2	1454	173318
Q9Y333	U6 snRNA-associated Sm-like protein LSm2 (Protein G7b) (Small nuclear ribonuclear protein D homolog) (snRNP core Sm-like protein Sm-x5)	LSM2	1	1	20	10.834	0.90509	20.758	7	0.51785	14.899	7	3100	232910
Q5T6L6	Citrulline--aspartate ligase (EC 6.3.4.5) (Fragment)	ASS1	3	2	13.6	22.411	0.70936	49.698	2	0.51899	32.066	2	498	54445
F8WAH1	Lysine ketoglutarate reductase (EC 1.5.1.8) (EC 1.5.1.9) (Saccharopine dehydrogenase)	AASS	3	4	8.6	81.037	0.63111	4.741	2	0.52088	38.684	2	2952	18992
Q16762	Thiosulfate sulfurtransferase (EC 2.8.1.1) (Rhodanese)	TST	2	7	30	33.429	0.63702	23.163	9	0.52638	21.144	9	1865	38014
E9PP21	Cysteine and glycine-rich protein 1	CSRP1	4	4	44.4	16.94	1.0827	22.934	7	0.53108	41.499	7	814	65705
H0YAE9	Uncharacterized protein (Fragment)	0	5	1	5.4	21.772	1.2722	6.2935	2	0.53164	37.166	2	143	46766
P13861	cAMP-dependent protein kinase type II-alpha regulatory subunit	PRKAR2A	4	4	13.9	45.518	0.63009	10.914	3	0.53466	20.198	3	708	2514
Q15276	Rab GTPase-binding effector protein 1 (Rabaptin-4) (Rabaptin-5) (Rabaptin-5alpha) (Renal carcinoma antigen NY-REN-17)	RABEP1	2	2	3.1	99.289	0.57187	29.842	3	0.53581	24.39	3	1791	18766
A0A0A0MRA5	Heterogeneous nuclear ribonucleoprotein U-like protein 1	HNRNPUL1	9	4	7.4	85.939	0.86001	32.245	7	0.53766	24.074	7	2602	146751
P13674	Prolyl 4-hydroxylase subunit alpha-1 (4-PH alpha-1) (EC 1.14.11.2) (Procollagen-proline,2-oxoglutarate-4-dioxygenase subunit alpha-1)	P4HA1	1	14	30.3	61.049	0.64607	33.472	21	0.5392	29.513	21	702	23251
Q99735	Microsomal glutathione S-transferase 2 (Microsomal GST-2) (EC 2.5.1.18) (Glutathione peroxidase MGST2) (EC 1.11.1.-) (Leukotriene C4 synthase MGST2) (EC 4.4.1.20) (Microsomal glutathione S-transferase II) (Microsomal GST-II)	MGST2	1	2	10.9	16.62	0.82118	30.319	9	0.5395	24.983	9	2530	221752
Q96EM0	Trans-3-hydroxy-L-proline dehydratase (EC 4.2.1.77) (Trans-L-3-hydroxyproline dehydratase)	L3HYPDH	1	1	4.8	38.137	0.61502	1.6291	2	0.54095	20.128	2	2404	100917
E7ETU5	RNA-binding motif, single-stranded-interacting protein 1	RBMS1	8	2	8.1	40.147	1.3318	50.51	2	0.54458	16.008	2	919	76508
A0A096LPI6	Utp12 domain-containing protein (Fragment)	0	13	4	22.9	30.376	0.87904	45.348	2	0.54574	13.39	2	3207	9296
H0YAC6	Lipopolysaccharide-responsive and beige-like anchor protein (Fragment)	LRBA	7	4	4.9	166.8	0.55971	21.436	5	0.55168	42.532	5	1191	59348
Q00266	S-adenosylmethionine synthase isoform type-1 (AdoMet synthase 1) (EC 2.5.1.6) (Methionine adenosyltransferase 1) (MAT 1) (Methionine adenosyltransferase I/III) (MAT-I/III)	MAT1A	2	12	37.7	43.647	0.88938	29.14	21	0.55691	30.569	21	1496	33827
Q9BZE9	Tether containing UBX domain for GLUT4 (Alveolar soft part sarcoma chromosomal region candidate gene 1 protein) (Alveolar soft part sarcoma locus) (Renal papillary cell carcinoma protein 17) (UBX domain-containing protein 9)	ASPSCR1	5	6	20.1	60.182	0.5695	40.261	11	0.55853	45.955	11	2653	1245
Q96C90	Protein phosphatase 1 regulatory subunit 14B (Phospholipase C-beta-3 neighbouring gene protein)	PPP1R14B	1	2	34.7	15.911	0.63878	22.913	2	0.56037	7.4411	2	2386	5516
O00267	Transcription elongation factor SPT5 (hSPT5) (DRB sensitivity-inducing factor 160 kDa subunit) (DSIF p160) (DRB sensitivity-inducing factor large subunit) (DSIF large subunit) (Tat-cotransactivator 1 protein) (Tat-CT1 protein)	SUPT5H	2	5	9.3	121	0.91061	68.304	3	0.56252	33.64	3	120	39621
H0YG82	28S ribosomal protein S35, mitochondrial (Fragment)	MRPS35	2	3	25.3	17.911	1.0286	93.536	2	0.5628	11.452	2	1474	95404
Q9Y2U8	Inner nuclear membrane protein Man1 (LEM domain-containing protein 3)	LEMD3	1	4	6.9	99.996	1.2465	0.17224	2	0.563	17.141	2	3087	267
Q16543	Hsp90 co-chaperone Cdc37 (Hsp90 chaperone protein kinase-targeting subunit) (p50Cdc37) [Cleaved into: Hsp90 co-chaperone Cdc37, N-terminally processed]	CDC37	5	6	19.6	44.468	0.55502	20.742	11	0.56371	26.626	11	1847	20444
K7EQ02	DAZ-associated protein 1 (Fragment)	DAZAP1	4	3	15.9	35.02	1.0766	41.189	12	0.56374	43.76	12	2405	56593
H0YGC7	Malonate--CoA ligase ACSF3, mitochondrial (Fragment)	ACSF3	9	2	12.6	20.3	0.50567	63.334	8	0.56483	50.03	8	1896	58005
P61353	60S ribosomal protein L27 (Large ribosomal subunit protein eL27)	RPL27	2	6	45.6	15.798	1.2379	56.063	28	0.5656	33.215	28	1345	38921
Q9Y6D5	Brefeldin A-inhibited guanine nucleotide-exchange protein 2 (Brefeldin A-inhibited GEP 2) (ADP-ribosylation factor guanine nucleotide-exchange factor 2)	ARFGEF2	4	4	2.7	202.04	1.3322	22.853	3	0.56631	32.249	3	3184	32764
A0A3B3IS06	Treacle protein (Fragment)	TCOF1	7	7	8.5	138.69	0.68419	26.491	8	0.56747	24.151	8	3219	73448
P50225	Sulfotransferase 1A1 (ST1A1) (EC 2.8.2.1) (Aryl sulfotransferase 1) (HAST1/HAST2) (Phenol sulfotransferase 1) (Phenol-sulfating phenol sulfotransferase 1) (P-PST 1) (ST1A3) (Thermostable phenol sulfotransferase) (Ts-PST)	SULT1A1	7	9	28.1	34.165	0.80892	46.151	14	0.56785	18.446	14	1180	17674
K7EPS5	Asialoglycoprotein receptor 1 (Fragment)	ASGR1	6	4	30.2	18.353	0.72915	2.8297	2	0.56796	15.727	2	583	34825
Q7Z7K6	Centromere protein V (CENP-V) (Nuclear protein p30) (Proline-rich protein 6)	CENPV	2	3	29.5	29.946	0.67732	11.282	7	0.56797	13.677	7	2080	19010
P49790	Nuclear pore complex protein Nup153 (153 kDa nucleoporin) (Nucleoporin Nup153)	NUP153	1	13	14.2	153.94	0.57308	27.072	4	0.56898	18.28	4	1170	50390
Q9BX68	Histidine triad nucleotide-binding protein 2, mitochondrial (HINT-2) (EC 3.-.-.-) (HINT-3) (HIT-17kDa) (PKCI-1-related HIT protein)	HINT2	1	3	31.3	17.162	0.687	12.493	10	0.57039	19.763	10	2625	19597
O43464	Serine protease HTRA2, mitochondrial (EC 3.4.21.108) (High temperature requirement protein A2) (HtrA2) (Omi stress-regulated endoprotease) (Serine protease 25) (Serine proteinase OMI)	HTRA2	2	3	6.8	48.84	0.49187	4.3027	2	0.57367	15.363	2	239	49323
A0A0C4DFQ1	Deleted.	0	2	1	3.7	47.994	0.5974	13.424	6	0.57515	22.804	6	1660	97718
Q14318	Peptidyl-prolyl cis-trans isomerase FKBP8 (PPIase FKBP8) (EC 5.2.1.8) (38 kDa FK506-binding protein) (38 kDa FKBP) (FKBP-38) (hFKBP38) (FK506-binding protein 8) (FKBP-8) (FKBPR38) (Rotamase)	FKBP8	4	2	7.8	44.561	0.51616	11.742	4	0.57564	11.838	4	1719	180835
Q9UJY4	ADP-ribosylation factor-binding protein GGA2 (Gamma-adaptin-related protein 2) (Golgi-localized, gamma ear-containing, ARF-binding protein 2) (VHS domain and ear domain of gamma-adaptin) (Vear)	GGA2	2	2	3.3	67.15	0.54835	9.2205	2	0.57668	41.919	2	2993	92206
Q96P48	Arf-GAP with Rho-GAP domain, ANK repeat and PH domain-containing protein 1 (Centaurin-delta-2) (Cnt-d2)	ARAP1	7	5	4.3	162.19	0.84864	19.178	4	0.57723	26.197	4	2472	5742
Q9NXS2	Glutaminyl-peptide cyclotransferase-like protein (EC 2.3.2.5) (Golgi-resident glutaminyl-peptide cyclotransferase) (isoQC) (gQC)	QPCTL	2	2	7.3	42.924	0.94623	9.7093	2	0.57828	21.893	2	2885	78254
Q5T440	Putative transferase CAF17, mitochondrial (EC 2.1.-.-) (Iron-sulfur cluster assembly factor homolog)	IBA57	1	3	17.1	38.155	0.79298	21.359	6	0.57865	36.189	6	1935	57093
E7ETB7	Caspase-8 (Fragment)	CASP8	9	2	12.6	23.465	0.81548	33.422	3	0.58152	46.931	3	1749	150647
Q13885	Tubulin beta-2A chain (Tubulin beta class IIa)	TUBB2A	2	20	51.9	49.906	0.90919	11.82	22	0.58154	35.305	22	1690	11153
B7Z8V7	NAD kinase 2, mitochondrial (EC 2.7.1.23) (NAD kinase domain-containing protein 1, mitochondrial)	NADK2	4	4	17.3	34.175	1.0343	17.035	7	0.58275	24.027	7	1895	26626
C9JSZ1	Far upstream element-binding protein 1 (Fragment)	FUBP1	1	7	49.1	24.043	0.60924	3.7048	4	0.58448	13.5	4	3234	72929
Q9BXR0	Queuine tRNA-ribosyltransferase catalytic subunit 1 (EC 2.4.2.29) (Guanine insertion enzyme) (tRNA-guanine transglycosylase)	QTRT1	4	4	16.9	44.047	0.60432	14.964	4	0.58502	17.738	4	2632	7715
P43155	Carnitine O-acetyltransferase (Carnitine acetylase) (EC 2.3.1.137) (EC 2.3.1.7) (Carnitine acetyltransferase) (CAT) (CrAT)	CRAT	3	3	7	70.857	0.70266	24.033	7	0.58562	29.682	7	1087	126507
Q9BSD7	Cancer-related nucleoside-triphosphatase (NTPase) (EC 3.6.1.15) (Nucleoside triphosphate phosphohydrolase)	NTPCR	2	2	15.8	20.713	0.73456	31.877	7	0.58643	27.841	7	2578	79855
A0A0U1RRM8	Fermitin family homolog 2 (Fragment)	FERMT2	5	5	14.9	61.796	1.0307	93.041	2	0.58731	79.162	2	2372	64373
Q9BTT6	Leucine-rich repeat-containing protein 1 (LANO adapter protein) (LAP and no PDZ protein)	LRRC1	2	3	9.2	59.241	0.99734	19.215	3	0.58864	2.637	3	2593	14884
Q9Y237	Peptidyl-prolyl cis-trans isomerase NIMA-interacting 4 (EC 5.2.1.8) (Parvulin-14) (Par14) (hPar14) (Parvulin-17) (Par17) (hPar17) (Peptidyl-prolyl cis-trans isomerase Pin4) (PPIase Pin4) (Peptidyl-prolyl cis/trans isomerase EPVH) (hEPVH) (Rotamase Pin4)	PIN4	5	2	32.1	13.81	0.90247	48.885	2	0.58939	17.395	2	3058	58580
P54577	Tyrosine--tRNA ligase, cytoplasmic (EC 6.1.1.1) (Tyrosyl-tRNA synthetase) (TyrRS) [Cleaved into: Tyrosine--tRNA ligase, cytoplasmic, N-terminally processed]	YARS1	2	12	26.9	59.143	0.63734	41.838	10	0.59138	44.721	10	1265	16615
Q9BRP1	Programmed cell death protein 2-like	PDCD2L	1	1	3.4	39.416	1.3037	9.4605	2	0.59317	2.6962	2	2568	3116
P31327	Carbamoyl-phosphate synthase [ammonia], mitochondrial (EC 6.3.4.16) (Carbamoyl-phosphate synthetase I) (CPSase I)	CPS1	2	8	7.7	164.94	0.86256	16.548	11	0.59332	35.959	11	955	26003
Q14247	Src substrate cortactin (Amplaxin) (Oncogene EMS1)	CTTN	3	15	32.7	61.585	0.69647	44.546	13	0.59625	53.499	13	1715	16852
K7EML3	Shiftless antiviral inhibitor of ribosomal frameshifting protein (Fragment)	SHFL	2	1	25.4	8.1251	0.69546	1.8542	3	0.59701	0.8435	3	2840	33075
Q8WUM0	Nuclear pore complex protein Nup133 (133 kDa nucleoporin) (Nucleoporin Nup133)	NUP133	1	4	6.2	128.98	0.67844	11.776	5	0.59816	45.931	5	2268	52423
P11413	Glucose-6-phosphate 1-dehydrogenase (G6PD) (EC 1.1.1.49)	G6PD	4	14	33.8	59.256	0.90772	37.728	28	0.5999	32.27	28	675	6606
O43813	Glutathione S-transferase LANCL1 (EC 2.5.1.18) (40 kDa erythrocyte membrane protein) (p40) (LanC-like protein 1)	LANCL1	3	2	7	45.283	1.0943	22.824	4	0.60125	36.043	4	264	116612
P62942	Peptidyl-prolyl cis-trans isomerase FKBP1A (PPIase FKBP1A) (EC 5.2.1.8) (12 kDa FK506-binding protein) (12 kDa FKBP) (FKBP-12) (Calstabin-1) (FK506-binding protein 1A) (FKBP-1A) (Immunophilin FKBP12) (Rotamase)	FKBP1A	8	4	50	11.951	1.0077	26.126	27	0.60182	16.83	27	1418	72784
Q01650	Large neutral amino acids transporter small subunit 1 (4F2 light chain) (4F2 LC) (4F2LC) (CD98 light chain) (Integral membrane protein E16) (E16) (L-type amino acid transporter 1) (hLAT1) (Solute carrier family 7 member 5) (y+ system cationic amino acid transporter)	SLC7A5	6	2	4.9	55.01	0.98079	47.452	6	0.60209	44.516	6	1514	113733
F8WCF9	D-2-hydroxyglutarate dehydrogenase, mitochondrial	D2HGDH	3	1	9.1	26.059	0.52322	12.789	4	0.60302	18.74	4	2163	101225
A0A2R8Y4W0	CCR4-NOT transcription complex subunit 3 (Fragment)	CNOT3	6	1	12.2	16.018	0.55431	19.382	2	0.60409	16.925	2	322	1222
Q86SX6	Glutaredoxin-related protein 5, mitochondrial (Monothiol glutaredoxin-5)	GLRX5	1	2	21	16.628	0.90195	24.825	9	0.60447	20.449	9	2081	39852
Q14847	LIM and SH3 domain protein 1 (LASP-1) (Metastatic lymph node gene 50 protein) (MLN 50)	LASP1	4	7	31.8	29.717	1.0626	20.866	12	0.60632	24.495	12	1751	3943
P21549	Serine--pyruvate aminotransferase (SPT) (EC 2.6.1.51) (Alanine--glyoxylate aminotransferase) (AGT) (EC 2.6.1.44)	AGXT	1	4	12.2	43.009	0.85164	23.046	14	0.60715	18.126	14	818	14446
O15126	Secretory carrier-associated membrane protein 1 (Secretory carrier membrane protein 1)	SCAMP1	5	3	22.5	37.92	0.8504	18.708	2	0.60735	5.435	2	191	143601
Q13148	TAR DNA-binding protein 43 (TDP-43)	TARDBP	16	3	17.9	44.739	0.64291	23.245	12	0.60742	27.494	12	1621	49328
M0QWZ7	Seryl-tRNA synthetase (EC 6.1.1.11) (Seryl-tRNA(Ser/Sec) synthetase)	SARS2	7	8	26.4	58.182	0.66277	22.297	15	0.6082	28.847	15	2780	14135
P25325	3-mercaptopyruvate sulfurtransferase (MST) (EC 2.8.1.2)	MPST	2	6	30.6	33.178	0.64569	17.977	6	0.60959	15.757	5	867	9199
O95487	Protein transport protein Sec24B (SEC24-related protein B)	SEC24B	1	2	2.7	137.42	0.85737	20.808	3	0.61094	26.181	3	445	28471
E9PQM0	Phosphatidylglycerophosphatase and protein-tyrosine phosphatase 1	PTPMT1	2	2	14.9	18.215	1.1581	56.041	2	0.61396	44.547	2	2267	2684
O75191	Xylulose kinase (Xylulokinase) (EC 2.7.1.17)	XYLB	3	6	19.4	58.382	0.77698	16.542	11	0.61505	18.834	11	325	7824
H3BQ52	cAMP-regulated phosphoprotein 19	ARPP19	7	1	15.5	7.6866	0.97313	18.742	2	0.61565	11.456	2	259	228380
P22570	NADPH:adrenodoxin oxidoreductase, mitochondrial (AR) (Adrenodoxin reductase) (EC 1.18.1.6) (Ferredoxin--NADP(+) reductase) (Ferredoxin reductase)	FDXR	11	17	41.5	53.836	0.65317	28.368	35	0.61574	31.201	35	836	13254
P26583	High mobility group protein B2 (High mobility group protein 2) (HMG-2)	HMGB2	2	8	23.9	24.033	0.82306	28.707	14	0.61587	30.077	14	881	78722
Q9NTI5	Sister chromatid cohesion protein PDS5 homolog B (Androgen-induced proliferation inhibitor) (Androgen-induced prostate proliferative shutoff-associated protein AS3)	PDS5B	2	3	3	164.67	0.46643	57.105	5	0.61632	16.565	5	2829	54996
Q96I24	Far upstream element-binding protein 3 (FUSE-binding protein 3)	FUBP3	1	8	32.2	61.64	0.85029	14.834	2	0.61641	13.051	2	2437	6286
Q9Y5J1	U3 small nucleolar RNA-associated protein 18 homolog (WD repeat-containing protein 50)	UTP18	1	3	8.6	62.003	0.72683	20.856	2	0.61718	42.969	2	3157	7718
P16930	Fumarylacetoacetase (FAA) (EC 3.7.1.2) (Beta-diketonase) (Fumarylacetoacetate hydrolase)	FAH	3	7	21	46.374	1.4113	60.736	12	0.61724	36.944	12	755	21687
Q3ZCM7	Tubulin beta-8 chain (Tubulin beta 8 class VIII)	TUBB8	4	11	24.5	49.775	0.78686	23.895	7	0.61818	15.926	7	1891	25956
M0R0F9	Cdc42-interacting protein 4	TRIP10	3	1	5.3	49.712	0.44913	4.7031	4	0.61856	3.9915	4	1822	191260
B8ZZU8	Elongin-B (Transcription elongation factor B (SIII), polypeptide 2 (18kDa, elongin B), isoform CRA_b)	ELOB	4	3	61.9	12.527	1.2209	27.6	3	0.61993	49.95	3	1802	4448
E9PNJ4	Stromal interaction molecule 1	STIM1	5	2	4.5	57.62	1.089	2.2434	2	0.62015	34.13	2	1672	13170
P10909	Clusterin (Aging-associated gene 4 protein) (Apolipoprotein J) (Apo-J) (Complement cytolysis inhibitor) (CLI) (Complement-associated protein SP-40,40) (Ku70-binding protein 1) (NA1/NA2) (Sulfated glycoprotein 2) (SGP-2) (Testosterone-repressed prostate message 2) (TRPM-2) [Cleaved into: Clusterin beta chain (ApoJalpha) (Complement cytolysis inhibitor a chain); Clusterin alpha chain (ApoJbeta) (Co…	CLU	3	2	7.3	52.494	0.74681	33.193	2	0.62072	16.524	2	660	45713
Q9GZN8	UPF0687 protein C20orf27	C20orf27	1	1	8	19.291	0.82427	6.859	7	0.62167	6.8223	7	2667	123100
Q06520	Bile salt sulfotransferase (EC 2.8.2.14) (Dehydroepiandrosterone sulfotransferase) (DHEA-ST) (Hydroxysteroid Sulfotransferase) (HST) (ST2) (ST2A3) (Sulfotransferase 2A1) (ST2A1)	SULT2A1	1	6	28.1	33.779	1.2689	18.615	21	0.62404	17.045	21	1557	82160
Q6P1N7	TAPBP protein (Tapasin)	TAPBP	7	1	8.3	16.442	0.7851	10.62	2	0.62486	25.006	2	220	225704
Q5TDH0	Protein DDI1 homolog 2 (EC 3.4.23.-)	DDI2	3	6	26.6	44.522	0.83757	12.479	9	0.6255	22.167	9	1944	35726
A0A087X208	Agrin	AGRN	2	5	4.4	202.29	0.64537	15.01	2	0.62563	34.886	2	133	40143
Q7Z2K6	Endoplasmic reticulum metallopeptidase 1 (EC 3.4.-.-) (Felix-ina)	ERMP1	3	7	9.5	100.23	1.0027	34.919	3	0.62744	13.007	3	2052	7094
O00178	GTP-binding protein 1 (G-protein 1) (GP-1) (GP1)	GTPBP1	2	2	5.1	72.453	0.71561	10.475	2	0.62774	41.07	2	110	122859
Q9Y2R5	28S ribosomal protein S17, mitochondrial (MRP-S17) (S17mt) (Mitochondrial small ribosomal subunit protein uS17m)	MRPS17	3	2	30.8	14.502	1.0123	0.080121	2	0.62778	7.5033	2	3083	149590
P16401	Histone H1.5 (Histone H1a) (Histone H1b) (Histone H1s-3)	H1-5	1	7	31	22.58	0.63437	25.816	33	0.6279	22.772	33	748	12422
Q9NQ94	APOBEC1 complementation factor (APOBEC1-stimulating protein)	A1CF	3	7	18.4	65.202	0.99147	12.697	7	0.62794	36.37	7	2794	34053
Q14684	Ribosomal RNA processing protein 1 homolog B (RRP1-like protein B)	RRP1B	1	5	13.2	84.427	0.88837	35.958	3	0.63172	17.253	3	1737	9030
P52948	Nuclear pore complex protein Nup98-Nup96 (EC 3.4.21.-) [Cleaved into: Nuclear pore complex protein Nup98 (98 kDa nucleoporin) (Nucleoporin Nup98) (Nup98); Nuclear pore complex protein Nup96 (96 kDa nucleoporin) (Nucleoporin Nup96) (Nup96)]	NUP98	4	5	3.8	197.58	0.74413	8.2284	9	0.63198	51.226	9	1241	21311
Q16822	Phosphoenolpyruvate carboxykinase [GTP], mitochondrial (PEPCK-M) (EC 4.1.1.32)	PCK2	7	25	46.9	70.698	0.78662	37.671	103	0.63249	21.711	103	1869	10402
Q9NRX1	RNA-binding protein PNO1 (Partner of NOB1)	PNO1	2	2	9.9	27.924	0.54356	44.419	2	0.63258	30.861	2	2818	95740
O75976	Carboxypeptidase D (EC 3.4.17.22) (Metallocarboxypeptidase D) (gp180)	CPD	2	8	10.4	152.93	0.68822	30.232	6	0.63258	57.776	6	384	26694
P13798	Acylamino-acid-releasing enzyme (AARE) (EC 3.4.19.1) (Acyl-peptide hydrolase) (APH) (Acylaminoacyl-peptidase) (Oxidized protein hydrolase) (OPH)	APEH	6	6	13.1	81.224	0.79538	41.03	5	0.63261	33.083	5	706	27482
Q9Y5K6	CD2-associated protein (Adapter protein CMS) (Cas ligand with multiple SH3 domains)	CD2AP	1	3	6.4	71.45	0.74297	23.542	2	0.63263	17.204	2	3161	17197
Q99956	Dual specificity protein phosphatase 9 (EC 3.1.3.16) (EC 3.1.3.48) (Mitogen-activated protein kinase phosphatase 4) (MAP kinase phosphatase 4) (MKP-4)	DUSP9	1	6	28.1	41.867	0.89959	11.149	3	0.63266	30.496	3	2543	14246
O15230	Laminin subunit alpha-5 (Laminin-10 subunit alpha) (Laminin-11 subunit alpha) (Laminin-15 subunit alpha)	LAMA5	2	11	4.7	399.73	0.54955	11.199	5	0.63315	8.2546	5	201	33646
J3QQY2	Calcium load-activated calcium channel (Transmembrane and coiled-coil domain-containing protein 1)	TMCO1	4	3	35.6	11.372	0.64124	42.222	5	0.634	57.123	5	3025	91309
Q92947	Glutaryl-CoA dehydrogenase, mitochondrial (GCD) (EC 1.3.8.6)	GCDH	4	4	13.9	48.127	0.82327	9.2813	4	0.63408	40.779	4	2344	11722
O15446	DNA-directed RNA polymerase I subunit RPA34 (A34.5) (Antisense to ERCC-1 protein) (ASE-1) (CD3-epsilon-associated protein) (CD3E-associated protein) (DNA-directed RNA polymerase I subunit G) (RNA polymerase I-associated factor PAF49)	POLR1G	1	5	21	54.985	0.76082	9.153	5	0.63473	8.9308	5	216	49249
Q3LXA3	Triokinase/FMN cyclase (Bifunctional ATP-dependent dihydroxyacetone kinase/FAD-AMP lyase (cyclizing)) [Includes: ATP-dependent dihydroxyacetone kinase (DHA kinase) (EC 2.7.1.28) (EC 2.7.1.29) (Glycerone kinase) (Triokinase) (Triose kinase); FAD-AMP lyase (cyclizing) (EC 4.6.1.15) (FAD-AMP lyase (cyclic FMN forming)) (FMN cyclase)]	TKFC	5	21	52.7	58.946	0.9913	31.68	93	0.63515	34.608	92	1887	5954
P0DMN0	Sulfotransferase 1A4 (ST1A4) (EC 2.8.2.1) (Aryl sulfotransferase 1A3/1A4) (Sulfotransferase 1A3/1A4)	SULT1A4	6	9	33.9	34.196	0.99689	27.529	54	0.63548	30.847	54	642	47255
P62310	U6 snRNA-associated Sm-like protein LSm3	LSM3	1	3	40.2	11.845	0.68089	33.357	6	0.63697	30.173	6	1382	4451
Q00534	Cyclin-dependent kinase 6 (EC 2.7.11.22) (Cell division protein kinase 6) (Serine/threonine-protein kinase PLSTIRE)	CDK6	1	5	18.7	36.938	0.63574	9.0396	2	0.63884	26.824	2	1499	62401
A0A2C9F2P4	Palmitoyl-protein hydrolase 1 (EC 3.1.2.22) (Palmitoyl-protein thioesterase 1)	PPT1	9	3	13.1	34.136	0.76194	17.405	9	0.63888	34.387	9	1193	51057
Q9BVP2	Guanine nucleotide-binding protein-like 3 (E2-induced gene 3 protein) (Novel nucleolar protein 47) (NNP47) (Nucleolar GTP-binding protein 3) (Nucleostemin)	GNL3	1	7	17.1	61.992	0.64085	15.43	11	0.6391	46.083	11	2617	28155
P07305	Histone H1.0 (Histone H1') (Histone H1(0)) [Cleaved into: Histone H1.0, N-terminally processed]	H1-0	1	6	27.8	20.863	0.84942	19.735	34	0.63942	42.034	34	582	74952
K7EM73	Calcium-activated neutral proteinase small subunit (Calcium-dependent protease small subunit) (Calcium-dependent protease small subunit 1) (Calpain regulatory subunit) (Calpain small subunit 1) (Fragment)	CAPNS1	9	2	20.2	15.958	1.2846	4.4564	2	0.63965	5.3603	2	538	91256
Q5T760	Serine/arginine-rich-splicing factor 11 (Fragment)	SRSF11	4	3	11.6	42.316	0.88076	16.566	8	0.64014	13.672	8	1549	14061
B8ZZA8	Glutaminase (EC 3.5.1.2)	GLS	2	3	24.9	18.634	1.234	27.496	2	0.64075	28.901	2	3231	79390
A0A0G2JQF2	Formimidoyltetrahydrofolate cyclodeaminase (EC 2.1.2.5) (EC 4.3.1.4) (Formimidoyltransferase-cyclodeaminase) (Formiminotetrahydrofolate cyclodeaminase) (Formiminotransferase-cyclodeaminase) (Glutamate formimidoyltransferase) (Glutamate formiminotransferase) (Glutamate formyltransferase) (Fragment)	FTCD	3	6	22.6	45.485	0.67642	25.801	14	0.64143	26.297	14	470	41709
A0A3B3ISQ6	Forkhead box protein P1 (Fragment)	FOXP1	15	1	7.6	23.178	0.8144	21.533	2	0.6422	52.126	2	2700	2291
P46109	Crk-like protein	CRKL	1	10	38	33.777	0.77697	39.517	10	0.64228	31.336	10	1104	37900
P82979	SAP domain-containing ribonucleoprotein (Cytokine-induced protein of 29 kDa) (Nuclear protein Hcc-1) (Proliferation-associated cytokine-inducible protein CIP29)	SARNP	4	5	27.6	23.671	0.72448	12.12	9	0.64233	39.503	9	1483	22793
Q14166	Tubulin--tyrosine ligase-like protein 12 (Inactive tubulin--tyrosine ligase-like protein 12)	TTLL12	2	8	19.1	74.403	0.99267	39.617	8	0.64427	28.535	8	1709	6820
Q5TEJ7	Replication protein A 32 kDa subunit (Fragment)	RPA2	2	1	6.7	19.433	0.8465	17.774	4	0.64517	16.251	4	742	82332
F5GWT4	Non-specific serine/threonine protein kinase (EC 2.7.11.1)	WNK1	3	2	2.4	225.5	0.54323	4.0929	2	0.6453	11.531	2	2714	44771
A0A0A0MSS8	Aldo-keto reductase family 1 member C3	AKR1C3	3	13	44.9	36.867	0.76005	26.872	20	0.64617	18.325	20	1076	42492
Q14692	Ribosome biogenesis protein BMS1 homolog (Ribosome assembly protein BMS1 homolog)	BMS1	1	5	7.7	145.81	0.65767	72.028	2	0.64771	52.796	2	1739	77343
E5RIT6	60S ribosomal protein L26-like 1 (Fragment)	RPL26L1	4	6	33.6	15.207	1.0786	27.857	2	0.64896	54.639	2	3042	16880
P17152	Transmembrane protein 11, mitochondrial (Protein PM1) (Protein PMI)	TMEM11	1	1	8.3	21.541	0.92307	3.4115	2	0.64942	5.1243	2	761	126076
C9J1X0	WD repeat-containing protein 91	WDR91	2	1	1.7	79.239	0.88294	8.3448	2	0.64956	6.7875	2	85	205904
P14174	Macrophage migration inhibitory factor (MIF) (EC 5.3.2.1) (Glycosylation-inhibiting factor) (GIF) (L-dopachrome isomerase) (L-dopachrome tautomerase) (EC 5.3.3.12) (Phenylpyruvate tautomerase)	MIF	1	2	17.4	12.476	0.86778	29.614	46	0.65002	29.696	46	711	119813
Q96PE7	Methylmalonyl-CoA epimerase, mitochondrial (EC 5.1.99.1) (DL-methylmalonyl-CoA racemase)	MCEE	3	2	12.5	18.749	0.84799	13.566	3	0.65008	17.079	3	2475	29965
Q9BRR8	G patch domain-containing protein 1 (Evolutionarily conserved G-patch domain-containing protein)	GPATCH1	1	1	2.5	103.34	0.81822	19.25	3	0.65242	16.033	3	2573	158676
Q9NWT6	Hypoxia-inducible factor 1-alpha inhibitor (EC 1.14.11.30) (EC 1.14.11.n4) (Factor inhibiting HIF-1) (FIH-1) (Hypoxia-inducible factor asparagine hydroxylase)	HIF1AN	3	3	14.3	40.285	0.68527	2.9186	2	0.65255	29.935	2	2868	2659
Q9UKY7	Protein CDV3 homolog	CDV3	6	6	48.8	27.335	0.74793	31.957	12	0.65314	29.004	12	3010	2473
M0R0Q7	DNA ligase (EC 6.5.1.1)	LIG1	4	3	5.1	88.386	0.55448	3.022	2	0.65388	3.7257	2	783	123951
Q96DV4	39S ribosomal protein L38, mitochondrial (L38mt) (MRP-L38) (Mitochondrial large ribosomal subunit protein mL38)	MRPL38	1	3	11.3	44.596	0.83015	19.841	7	0.65431	27.726	7	2398	191185
P05362	Intercellular adhesion molecule 1 (ICAM-1) (Major group rhinovirus receptor) (CD antigen CD54)	ICAM1	3	10	25.6	57.825	0.54669	28.019	22	0.65457	24.392	22	554	12270
Q9BYD1	39S ribosomal protein L13, mitochondrial (L13mt) (MRP-L13) (Mitochondrial large ribosomal subunit protein uL13m)	MRPL13	4	3	15.7	20.692	1.2149	46.038	2	0.65506	19.933	2	2643	18346
Q86TX2	Acyl-coenzyme A thioesterase 1 (Acyl-CoA thioesterase 1) (EC 3.1.2.-) (CTE-I) (CTE-Ib) (Inducible cytosolic acyl-coenzyme A thioester hydrolase) (Long chain acyl-CoA thioester hydrolase) (Long chain acyl-CoA hydrolase) (Palmitoyl-coenzyme A thioesterase) (EC 3.1.2.2)	ACOT1	6	10	28.3	46.277	0.83011	37.079	26	0.65748	28.255	26	2086	2767
Q96HE7	ERO1-like protein alpha (ERO1-L) (ERO1-L-alpha) (EC 1.8.4.-) (Endoplasmic oxidoreductin-1-like protein) (Endoplasmic reticulum oxidoreductase alpha) (Oxidoreductin-1-L-alpha)	ERO1A	4	5	17.3	54.392	1.1625	75.994	2	0.65886	21.112	2	2433	53971
P16403	Histone H1.2 (Histone H1c) (Histone H1d) (Histone H1s-1)	H1-2	4	15	42.7	21.364	0.98717	61.535	113	0.65944	28.765	113	749	12056
Q16658	Fascin (55 kDa actin-bundling protein) (Singed-like protein) (p55)	FSCN1	1	2	5.9	54.529	0.8334	9.2395	6	0.66292	13.305	6	1859	128450
Q02880	DNA topoisomerase 2-beta (EC 5.6.2.2) (DNA topoisomerase II, beta isozyme)	TOP2B	2	9	7.5	183.26	0.67814	22.387	5	0.66337	14.86	5	1531	52474
A0A1B0GU86	N-acyl-L-amino-acid amidohydrolase (EC 3.5.1.14)	ACY1	13	9	29.8	42.179	0.56459	50.476	17	0.66578	29.985	17	1534	25564
P01024	Complement C3 (C3 and PZP-like alpha-2-macroglobulin domain-containing protein 1) [Cleaved into: Complement C3 beta chain; C3-beta-c (C3bc); Complement C3 alpha chain; C3a anaphylatoxin; Acylation stimulating protein (ASP) (C3adesArg); Complement C3b alpha' chain; Complement C3c alpha' chain fragment 1; Complement C3dg fragment; Complement C3g fragment; Complement C3d fragment; Complement C3f fra…	C3	3	28	25.1	187.15	0.82248	31.537	49	0.66795	32.399	49	503	3942
P14927	Cytochrome b-c1 complex subunit 7 (Complex III subunit 7) (Complex III subunit VII) (QP-C) (Ubiquinol-cytochrome c reductase complex 14 kDa protein)	UQCRB	3	3	23.4	13.53	0.80895	18.052	5	0.66805	26.891	5	727	13060
Q14137	Ribosome biogenesis protein BOP1 (Block of proliferation 1 protein)	BOP1	2	9	17.3	83.629	0.63758	27.259	7	0.66943	19.871	7	1699	34780
Q8N6C5	Immunoglobulin superfamily member 1 (IgSF1) (Immunoglobulin-like domain-containing protein 1) (Inhibin-binding protein) (InhBP) (Pituitary gland-specific factor 2) (p120)	IGSF1	1	2	1.6	148.93	0.75463	7.6396	2	0.66953	0.73718	2	2175	98146
H0YIQ2	YLP motif-containing protein 1 (Fragment)	YLPM1	4	3	3.5	180.28	0.72736	7.5122	3	0.66959	11.867	3	1165	18786
Q86VM6	MBNL1 protein (Muscleblind-like (Drosophila), isoform CRA_f) (Muscleblind-like protein 1)	MBNL1	8	2	11.1	36.551	1.0381	20.857	3	0.67055	51.944	3	2811	2451
Q14739	Delta(14)-sterol reductase LBR (Delta-14-SR) (EC 1.3.1.70) (3-beta-hydroxysterol Delta (14)-reductase) (C-14 sterol reductase) (C14SR) (Integral nuclear envelope inner membrane protein) (LMN2R) (Lamin-B receptor) (Sterol C14-reductase)	LBR	2	4	8.6	70.702	0.98075	36.097	4	0.67069	33.943	4	1745	131984
Q6P587	Acylpyruvase FAHD1, mitochondrial (EC 3.7.1.5) (Fumarylacetoacetate hydrolase domain-containing protein 1) (FAH domain-containing protein 1) (Oxaloacetate decarboxylase) (OAA decarboxylase) (EC 4.1.1.112) (YisK-like protein)	FAHD1	1	2	20.1	24.843	0.74182	20.079	5	0.67151	34.238	5	1997	163767
Q02252	Methylmalonate-semialdehyde dehydrogenase [acylating], mitochondrial (MMSDH) (Malonate-semialdehyde dehydrogenase [acylating]) (EC 1.2.1.18) (EC 1.2.1.27) (Aldehyde dehydrogenase family 6 member A1)	ALDH6A1	2	9	24.7	57.839	0.8813	23.549	8	0.67151	37.105	8	1522	7370
Q9NSE4	Isoleucine--tRNA ligase, mitochondrial (EC 6.1.1.5) (Isoleucyl-tRNA synthetase) (IleRS)	IARS2	1	14	16.6	113.79	0.84347	15.387	14	0.67173	17.038	14	2827	21509
P43897	Elongation factor Ts, mitochondrial (EF-Ts) (EF-TsMt)	TSFM	5	2	13.5	35.39	0.73005	13.496	5	0.67208	37.817	5	1094	66030
P62917	60S ribosomal protein L8 (Large ribosomal subunit protein uL2)	RPL8	5	11	35.8	28.024	1.0553	31.276	47	0.67263	54.516	47	1416	19462
P30086	Phosphatidylethanolamine-binding protein 1 (PEBP-1) (HCNPpp) (Neuropolypeptide h3) (Prostatic-binding protein) (Raf kinase inhibitor protein) (RKIP) [Cleaved into: Hippocampal cholinergic neurostimulating peptide (HCNP)]	PEBP1	1	11	71.7	21.057	1.1907	40.769	91	0.67305	35.875	91	935	18491
P42166	Lamina-associated polypeptide 2, isoform alpha (Thymopoietin isoform alpha) (TP alpha) (Thymopoietin-related peptide isoform alpha) (TPRP isoform alpha) [Cleaved into: Thymopoietin (TP) (Splenin); Thymopentin (TP5)]	TMPO	1	14	33.6	75.491	0.76161	31.608	26	0.67327	27.066	26	1071	16662
D6RG15	Twinfilin-2	TWF2	3	4	28	28.882	0.93495	32.414	8	0.67328	15.102	8	1979	51049
Q9H9A6	Leucine-rich repeat-containing protein 40	LRRC40	1	1	2	68.249	0.70768	23.957	2	0.67363	6.5072	2	2740	57546
A6NNK5	TP53-binding protein 1	TP53BP1	4	2	2.5	209.02	0.5224	14.23	2	0.67392	2.5736	2	1597	44235
Q13451	Peptidyl-prolyl cis-trans isomerase FKBP5 (PPIase FKBP5) (EC 5.2.1.8) (51 kDa FK506-binding protein) (51 kDa FKBP) (FKBP-51) (54 kDa progesterone receptor-associated immunophilin) (Androgen-regulated protein 6) (FF1 antigen) (FK506-binding protein 5) (FKBP-5) (FKBP54) (p54) (HSP90-binding immunophilin) (Rotamase)	FKBP5	1	3	9	51.212	0.78001	29.93	3	0.67397	6.1732	3	1655	38578
Q92575	UBX domain-containing protein 4 (Erasin) (UBX domain-containing protein 2)	UBXN4	1	2	10.8	56.777	0.59426	24.737	3	0.67406	10.39	3	2306	125661
A0A0B4J1R2	Propionate--CoA ligase (EC 6.2.1.17)	ACSS3	3	13	30.8	74.591	0.7519	33.833	23	0.6746	30.563	23	2724	1023
F5H1Z6	START domain-containing protein 10 (Fragment)	STARD10	14	5	25.8	29.043	1.0408	59.391	7	0.67464	22.641	7	3102	26299
J3QRD1	Aldehyde dehydrogenase family 3 member A2	ALDH3A2	20	9	30.3	44.648	0.79912	24.36	29	0.67477	17.086	29	1210	46325
I3L3N5	Platelet-activating factor acetylhydrolase IB subunit alpha (Fragment)	PAFAH1B1	2	2	17.3	23.691	1.2993	52.881	3	0.67532	51.492	3	1086	145229
F6TR53	HCLS1-binding protein 3	HS1BP3	2	1	8	23.6	0.89009	8.926	2	0.67551	21.966	2	1914	28883
O00748	Cocaine esterase (EC 3.1.1.84) (Carboxylesterase 2) (CE-2) (hCE-2) (EC 3.1.1.1) (Methylumbelliferyl-acetate deacetylase 2) (EC 3.1.1.56)	CES2	2	6	15.7	61.806	1.0459	35.811	11	0.67669	27.958	11	147	53239
O43678	NADH dehydrogenase [ubiquinone] 1 alpha subcomplex subunit 2 (Complex I-B8) (CI-B8) (NADH-ubiquinone oxidoreductase B8 subunit)	NDUFA2	1	2	31.3	10.921	0.85149	10.617	9	0.67677	15.214	9	250	17096
P31937	3-hydroxyisobutyrate dehydrogenase, mitochondrial (HIBADH) (EC 1.1.1.31)	HIBADH	2	8	38.1	35.329	0.67441	26.941	17	0.67718	13.512	17	960	34096
A0A3B3ITC2	Beta-1-syntrophin	SNTB1	4	8	29.7	44.249	0.76446	43.954	10	0.67726	35.774	10	1689	23827
Q92979	Ribosomal RNA small subunit methyltransferase NEP1 (EC 2.1.1.-) (18S rRNA (pseudouridine(1248)-N1)-methyltransferase) (18S rRNA Psi1248 methyltransferase) (Nucleolar protein EMG1 homolog) (Protein C2f) (Ribosome biogenesis protein NEP1)	EMG1	4	4	23.4	26.72	0.57205	53.222	9	0.67754	39.019	9	2346	2328
A0A1B0GTG2	Alpha-aminoadipic semialdehyde dehydrogenase	ALDH7A1	18	17	42.5	58.139	0.83594	35.171	60	0.67846	26.972	60	1155	34720
H7C5S6	Leucine-rich repeat and WD repeat-containing protein 1 (Fragment)	LRWD1	2	2	12.8	19.914	0.78425	6.3119	3	0.67855	22.441	3	2960	29563
Q96AB3	Isochorismatase domain-containing protein 2	ISOC2	3	3	24.9	22.337	0.83123	10.704	4	0.67995	8.1587	4	2371	49239
Q8TAT6	Nuclear protein localization protein 4 homolog (Protein NPL4)	NPLOC4	3	3	5.8	68.119	0.868	16.439	8	0.68002	35.144	8	2235	6661
Q92797	Symplekin	SYMPK	6	6	7.6	141.15	0.86798	52.588	10	0.68018	47.585	9	2328	41636
Q92785	Zinc finger protein ubi-d4 (Apoptosis response zinc finger protein) (BRG1-associated factor 45D) (BAF45D) (D4, zinc and double PHD fingers family 2) (Protein requiem)	DPF2	3	6	25.3	44.155	0.78799	13.435	4	0.68086	12.084	4	2326	3581
P33908	Mannosyl-oligosaccharide 1,2-alpha-mannosidase IA (EC 3.2.1.113) (Man(9)-alpha-mannosidase) (Man9-mannosidase) (Mannosidase alpha class 1A member 1) (Processing alpha-1,2-mannosidase IA) (Alpha-1,2-mannosidase IA)	MAN1A1	1	7	17.9	72.968	0.70024	57.873	2	0.68226	98.526	2	978	24801
P68402	Platelet-activating factor acetylhydrolase IB subunit beta (EC 3.1.1.47) (PAF acetylhydrolase 30 kDa subunit) (PAF-AH 30 kDa subunit) (PAF-AH subunit beta) (PAFAH subunit beta)	PAFAH1B2	2	4	16.6	25.569	1.3437	56.081	4	0.68244	49.525	4	1448	89613
P50416	Carnitine O-palmitoyltransferase 1, liver isoform (CPT1-L) (EC 2.3.1.21) (Carnitine O-palmitoyltransferase I, liver isoform) (CPT I) (CPTI-L) (Carnitine palmitoyltransferase 1A)	CPT1A	5	7	11.8	88.367	0.42983	34.914	6	0.68318	16.133	6	1183	16751
Q9H0D6	5'-3' exoribonuclease 2 (EC 3.1.13.-) (DHM1-like protein) (DHP protein)	XRN2	1	9	14.1	108.58	0.76963	67.011	9	0.68318	28.028	9	2679	1787
Q08380	Galectin-3-binding protein (Basement membrane autoantigen p105) (Lectin galactoside-binding soluble 3-binding protein) (Mac-2-binding protein) (MAC2BP) (Mac-2 BP) (Tumor-associated antigen 90K)	LGALS3BP	6	3	9.7	65.33	0.641	17.764	11	0.68347	8.2528	11	1573	1165
Q8WXF1	Paraspeckle component 1 (Paraspeckle protein 1)	PSPC1	2	10	29.4	58.743	0.88124	23.291	17	0.68359	25.732	17	2285	6147
P35269	General transcription factor IIF subunit 1 (General transcription factor IIF 74 kDa subunit) (Transcription initiation factor IIF subunit alpha) (TFIIF-alpha) (Transcription initiation factor RAP74)	GTF2F1	4	2	5.2	58.24	0.83377	37.505	4	0.68366	23.513	4	999	1838
A0A0A0MRN5	Opioid growth factor receptor (Opioid growth factor receptor, isoform CRA_d)	OGFR	4	3	7.4	67.194	0.57821	6.5183	2	0.68476	35.455	2	2910	30028
P36405	ADP-ribosylation factor-like protein 3	ARL3	1	3	28.6	20.455	1.0218	19.762	2	0.68511	10.814	2	1015	91755
A8MQ02	Afadin	AFDN	10	8	7.2	201.8	0.82906	19.281	11	0.68614	28.625	11	1282	101296
Q6ZRP7	Sulfhydryl oxidase 2 (EC 1.8.3.2) (Neuroblastoma-derived sulfhydryl oxidase) (Quiescin Q6-like protein 1)	QSOX2	1	1	2.3	77.528	0.78411	11.664	9	0.68727	15.779	9	2027	111462
P50135	Histamine N-methyltransferase (HMT) (EC 2.1.1.8)	HNMT	1	4	17.1	33.295	0.69882	96.871	8	0.68765	32.098	8	1178	6215
P24928	DNA-directed RNA polymerase II subunit RPB1 (RNA polymerase II subunit B1) (EC 2.7.7.6) (DNA-directed RNA polymerase II subunit A) (DNA-directed RNA polymerase III largest subunit) (RNA-directed RNA polymerase II subunit RPB1) (EC 2.7.7.48)	POLR2A	1	7	5.8	217.17	0.9201	32.174	5	0.68789	34.161	5	863	92275
Q96IU4	Protein ABHD14B (EC 3.-.-.-) (Alpha/beta hydrolase domain-containing protein 14B) (Abhydrolase domain-containing protein 14B) (CCG1-interacting factor B)	ABHD14B	3	4	28.1	22.345	0.89088	46.742	10	0.68852	27.165	10	2443	23989
O00425	Insulin-like growth factor 2 mRNA-binding protein 3 (IGF2 mRNA-binding protein 3) (IMP-3) (IGF-II mRNA-binding protein 3) (KH domain-containing protein overexpressed in cancer) (hKOC) (VICKZ family member 3)	IGF2BP3	2	16	34.4	63.704	0.74363	25.453	52	0.68871	23.365	52	129	53129
P22314	Ubiquitin-like modifier-activating enzyme 1 (EC 6.2.1.45) (Protein A1S9) (Ubiquitin-activating enzyme E1)	UBA1	7	23	29.5	117.85	0.72184	33.879	107	0.68882	21.914	107	834	2838
P07942	Laminin subunit beta-1 (Laminin B1 chain) (Laminin-1 subunit beta) (Laminin-10 subunit beta) (Laminin-12 subunit beta) (Laminin-2 subunit beta) (Laminin-6 subunit beta) (Laminin-8 subunit beta)	LAMB1	3	7	6.3	198.04	0.64869	19.452	6	0.68967	16.526	6	596	44333
X6RI37	Leucine-rich repeat protein SHOC-2 (Fragment)	SHOC2	2	1	3.5	41.898	0.8594	12.272	2	0.68967	24.189	2	3049	133539
Q8ND76	Cyclin-Y (Cyc-Y) (Cyclin box protein 1) (Cyclin fold protein 1) (cyclin-X)	CCNY	1	1	5	39.336	0.4481	29.066	3	0.68977	0.86797	3	2208	169644
H7BXZ6	Mitochondrial Rho GTPase (EC 3.6.5.-)	RHOT1	5	4	9.4	68.449	0.90441	18.208	3	0.68979	11.704	3	2135	82035
P08243	Asparagine synthetase [glutamine-hydrolyzing] (EC 6.3.5.4) (Cell cycle control protein TS11) (Glutamine-dependent asparagine synthetase)	ASNS	6	11	25.7	64.369	0.96507	35.468	16	0.69015	22.928	16	605	40546
P35250	Replication factor C subunit 2 (Activator 1 40 kDa subunit) (A1 40 kDa subunit) (Activator 1 subunit 2) (Replication factor C 40 kDa subunit) (RF-C 40 kDa subunit) (RFC40)	RFC2	7	2	8.5	39.157	0.67588	36.444	4	0.69032	26.643	4	996	44702
P05091	Aldehyde dehydrogenase, mitochondrial (EC 1.2.1.3) (ALDH class 2) (ALDH-E2) (ALDHI)	ALDH2	3	26	55.1	56.381	0.8634	26.422	117	0.69042	24.579	116	546	1183
Q9BQ67	Glutamate-rich WD repeat-containing protein 1	GRWD1	2	2	6.7	49.419	0.94831	5.3863	3	0.69082	31.252	3	2551	19743
Q9Y584	Mitochondrial import inner membrane translocase subunit Tim22 (Testis-expressed protein 4)	TIMM22	1	1	7.7	20.031	0.63224	2.4819	2	0.69106	9.7815	2	3153	120774
E9PF16	Medium-chain acyl-CoA ligase ACSF2, mitochondrial	ACSF2	3	5	12.6	63.652	0.65827	20.263	9	0.69141	29.345	9	2389	64003
Q16718	NADH dehydrogenase [ubiquinone] 1 alpha subcomplex subunit 5 (Complex I subunit B13) (Complex I-13kD-B) (CI-13kD-B) (NADH-ubiquinone oxidoreductase 13 kDa-B subunit)	NDUFA5	6	3	35.3	13.459	1.3172	11.932	12	0.69213	21.231	12	1862	90762
Q8TEM1	Nuclear pore membrane glycoprotein 210 (Nuclear pore protein gp210) (Nuclear envelope pore membrane protein POM 210) (POM210) (Nucleoporin Nup210) (Pore membrane protein of 210 kDa)	NUP210	1	17	13.8	205.11	0.5702	28.52	12	0.69331	18.5	12	2256	21501
O95674	Phosphatidate cytidylyltransferase 2 (EC 2.7.7.41) (CDP-DAG synthase 2) (CDP-DG synthase 2) (CDP-diacylglycerol synthase 2) (CDS 2) (CDP-diglyceride pyrophosphorylase 2) (CDP-diglyceride synthase 2) (CTP:phosphatidate cytidylyltransferase 2)	CDS2	1	1	4.3	51.417	0.66757	2.7227	4	0.69331	19.863	4	453	6627
P78406	mRNA export factor (Rae1 protein homolog) (mRNA-associated protein mrnp 41)	RAE1	5	6	29.3	40.968	0.81216	20.467	9	0.69376	20.794	8	1462	18197
Q00577	Transcriptional activator protein Pur-alpha (Purine-rich single-stranded DNA-binding protein alpha)	PURA	1	5	30.4	34.91	0.65297	49.144	6	0.69449	16.954	6	1501	810
O43660	Pleiotropic regulator 1	PLRG1	3	6	23.7	57.193	0.74113	25.246	8	0.69517	28.015	8	247	21794
P38117	Electron transfer flavoprotein subunit beta (Beta-ETF)	ETFB	2	11	44.7	27.843	0.76945	34.1	49	0.69525	24.118	49	1033	45254
Q13263	Transcription intermediary factor 1-beta (TIF1-beta) (E3 SUMO-protein ligase TRIM28) (EC 2.3.2.27) (KRAB-associated protein 1) (KAP-1) (KRAB-interacting protein 1) (KRIP-1) (Nuclear corepressor KAP-1) (RING finger protein 96) (RING-type E3 ubiquitin transferase TIF1-beta) (Tripartite motif-containing protein 28)	TRIM28	4	20	49.7	88.549	0.69487	26.9	47	0.69674	23.801	47	1634	2464
A0A0U1RR23	ST20-MTHFS readthrough (Fragment)	ST20-MTHFS	4	2	18	14.011	0.85818	44.793	3	0.69781	28.2	3	1174	59703
A0A087WY55	Chromosome 6 open reading frame 55, isoform CRA_b (Vacuolar protein sorting-associated protein VTA1 homolog)	VTA1	3	2	12.1	31.102	0.64327	21.967	7	0.69828	21.765	7	2779	1698
Q12792	Twinfilin-1 (Protein A6) (Protein tyrosine kinase 9)	TWF1	3	3	12.9	40.282	1.0312	13.361	4	0.69871	38.423	4	1592	40518
Q15758	Neutral amino acid transporter B(0) (ATB(0)) (Baboon M7 virus receptor) (RD114/simian type D retrovirus receptor) (Sodium-dependent neutral amino acid transporter type 2) (Solute carrier family 1 member 5)	SLC1A5	3	5	18.3	56.598	1.9121	68.177	7	0.69936	35.569	7	1828	52014
P48147	Prolyl endopeptidase (PE) (EC 3.4.21.26) (Post-proline cleaving enzyme)	PREP	1	7	11.8	80.699	0.87036	5.8055	5	0.69946	24.633	5	1130	99955
P00367	Glutamate dehydrogenase 1, mitochondrial (GDH 1) (EC 1.4.1.3)	GLUD1	2	27	52.3	61.397	0.94259	32.265	240	0.6997	23.714	240	481	12206
Q9H0A0	RNA cytidine acetyltransferase (EC 2.3.1.-) (18S rRNA cytosine acetyltransferase) (N-acetyltransferase 10) (N-acetyltransferase-like protein) (hALP)	NAT10	3	7	10.4	115.73	0.6048	23.849	8	0.70138	20.246	8	2677	8136
P42167	Lamina-associated polypeptide 2, isoforms beta/gamma (Thymopoietin, isoforms beta/gamma) (TP beta/gamma) (Thymopoietin-related peptide isoforms beta/gamma) (TPRP isoforms beta/gamma) [Cleaved into: Thymopoietin (TP) (Splenin); Thymopentin (TP5)]	TMPO	3	12	42.1	50.67	0.73344	9.5178	9	0.70161	22.906	9	1072	48575
P46939	Utrophin (Dystrophin-related protein 1) (DRP-1)	UTRN	5	24	11.6	394.46	0.84813	34.936	26	0.7025	33.213	26	1118	4522
P18754	Regulator of chromosome condensation (Cell cycle regulatory protein) (Chromosome condensation protein 1)	RCC1	6	10	44.4	44.969	0.90534	36.517	25	0.70392	24.868	25	782	36584
Q99856	AT-rich interactive domain-containing protein 3A (ARID domain-containing protein 3A) (B-cell regulator of IgH transcription) (Bright) (Dead ringer-like protein 1) (E2F-binding protein 1)	ARID3A	4	9	21.4	62.888	0.87421	43.403	18	0.70417	28.183	18	2540	14790
Q9H0S4	Probable ATP-dependent RNA helicase DDX47 (EC 3.6.4.13) (DEAD box protein 47)	DDX47	2	4	11.4	50.646	0.73548	45.593	5	0.7044	24.135	5	2683	32692
C9JLJ1	F-box-like/WD repeat-containing protein TBL1XR1 (Fragment)	TBL1XR1	9	1	41.8	5.5529	0.95898	24.001	3	0.70447	8.2818	3	2654	109285
Q96GD0	Pyridoxal phosphate phosphatase (PLP phosphatase) (EC 3.1.3.3) (EC 3.1.3.74) (Chronophin)	PDXP	2	5	23	31.698	0.93331	18.809	6	0.70471	26.662	6	2422	1827
Q9NX24	H/ACA ribonucleoprotein complex subunit 2 (Nucleolar protein family A member 2) (snoRNP protein NHP2)	NHP2	4	2	25.5	17.201	0.65876	14.237	4	0.70495	17.228	4	2874	150442
Q9H4A4	Aminopeptidase B (AP-B) (EC 3.4.11.6) (Arginine aminopeptidase) (Arginyl aminopeptidase)	RNPEP	5	8	18.5	72.595	0.80454	25.634	19	0.70577	29.756	19	2715	6977
P20700	Lamin-B1	LMNB1	4	24	46.4	66.408	0.89271	31.339	65	0.70588	20.478	65	807	6100
Q9Y2R4	Probable ATP-dependent RNA helicase DDX52 (EC 3.6.4.13) (ATP-dependent RNA helicase ROK1-like) (DEAD box protein 52)	DDX52	5	4	11.5	67.497	1.0098	3.6908	2	0.70675	44.203	2	3082	86910
Q6PGP7	Tetratricopeptide repeat protein 37 (TPR repeat protein 37) (SKI3 homolog) (Ski3) (Tricho-hepatic-enteric syndrome protein) (Thespin)	TTC37	2	3	4	175.48	0.70077	51.392	5	0.70686	55.312	5	2002	10970
P29350	Tyrosine-protein phosphatase non-receptor type 6 (EC 3.1.3.48) (Hematopoietic cell protein-tyrosine phosphatase) (Protein-tyrosine phosphatase 1C) (PTP-1C) (Protein-tyrosine phosphatase SHP-1) (SH-PTP1)	PTPN6	3	2	5.9	67.56	0.81225	27.96	2	0.70757	7.7466	2	917	37841
Q6GMV2	SET and MYND domain-containing protein 5 (EC 2.1.1.-) (Protein NN8-4AG) (Retinoic acid-induced protein 15)	SMYD5	2	3	12.4	47.34	1.0472	41.014	5	0.70791	19.117	5	1973	107085
Q96P70	Importin-9 (Imp9) (Ran-binding protein 9) (RanBP9)	IPO9	1	3	5.7	115.96	1.0617	22.376	16	0.70804	13.419	16	2473	106
F5GWH5	Dolichyl-diphosphooligosaccharide--protein glycosyltransferase subunit TMEM258 (Transmembrane protein 258)	TMEM258	2	1	16.3	5.7065	0.9369	10.821	9	0.70808	12.473	9	1334	139060
Q14353	Guanidinoacetate N-methyltransferase (EC 2.1.1.2)	GAMT	2	7	42.8	26.318	0.78938	54.871	14	0.70848	26.508	14	1720	91284
F1T0B3	ATP-dependent RNA helicase DDX1 (DEAD box protein 1)	DDX1	3	11	22.9	73.915	0.9294	26.381	25	0.70866	36.873	25	2293	14048
E9PPW7	Complex I-23kD (EC 7.1.1.2) (NADH dehydrogenase [ubiquinone] iron-sulfur protein 8, mitochondrial) (NADH-ubiquinone oxidoreductase 23 kDa subunit) (Fragment)	NDUFS8	5	2	16.3	20.656	0.6641	17.459	8	0.70888	28.442	8	114	110441
Q9P258	Protein RCC2 (RCC1-like protein TD-60) (Telophase disk protein of 60 kDa)	RCC2	1	9	24.9	56.084	0.69809	54.838	18	0.70901	34.981	18	2927	281
Q5JTH9	RRP12-like protein	RRP12	3	5	5.4	143.7	0.6327	12.169	8	0.70917	26.368	8	1923	16410
Q3MHD2	Protein LSM12 homolog	LSM12	2	1	8.7	21.701	1.0138	66.242	2	0.71047	8.2755	2	1888	2285
Q92945	Far upstream element-binding protein 2 (FUSE-binding protein 2) (KH type-splicing regulatory protein) (KSRP) (p75)	KHSRP	10	21	43.6	73.114	0.84614	40.84	62	0.71076	25.682	62	2343	11286
Q14980	Nuclear mitotic apparatus protein 1 (Nuclear matrix protein-22) (NMP-22) (Nuclear mitotic apparatus protein) (NuMA protein) (SP-H antigen)	NUMA1	7	20	15.5	238.26	0.65058	30.216	15	0.71291	29.874	15	1754	21433
Q9NUJ1	Mycophenolic acid acyl-glucuronide esterase, mitochondrial (EC 3.1.1.93) (Alpha/beta hydrolase domain-containing protein 10) (Abhydrolase domain-containing protein 10)	ABHD10	1	4	20.9	33.932	1.061	49.829	6	0.71293	22.868	6	2838	54262
R9WNI0	Synaptic functional regulator FMR1	FMR1	5	2	2.9	61.515	1.0958	5.7855	2	0.71353	18.239	2	1559	117851
P49916	DNA ligase 3 (EC 6.5.1.1) (DNA ligase III) (Polydeoxyribonucleotide synthase [ATP] 3)	LIG3	3	3	3.2	112.91	0.883	14.719	5	0.71394	10.332	5	1176	102243
Q03252	Lamin-B2	LMNB2	1	15	30.8	69.948	0.87956	28.168	27	0.71419	21.496	27	1536	8219
O00170	AH receptor-interacting protein (AIP) (Aryl-hydrocarbon receptor-interacting protein) (HBV X-associated protein 2) (XAP-2) (Immunophilin homolog ARA9)	AIP	1	1	4.2	37.636	0.71262	13.777	7	0.71421	7.1847	7	109	211574
A0A3B3IUB9	Baculoviral IAP repeat-containing protein 6 (Fragment)	BIRC6	2	5	3	419.02	0.92434	27.713	3	0.71529	37.248	3	2804	65340
P52701	DNA mismatch repair protein Msh6 (hMSH6) (G/T mismatch-binding protein) (GTBP) (GTMBP) (MutS protein homolog 6) (MutS-alpha 160 kDa subunit) (p160)	MSH6	5	11	13.5	152.78	0.75369	37.142	10	0.71534	29.005	10	1230	360
A0A3B3ITX7	Acylglycerol kinase, mitochondrial	AGK	10	3	22.4	23.423	1.2069	9.3394	3	0.71548	14.308	3	1908	23729
Q9Y6M1	Insulin-like growth factor 2 mRNA-binding protein 2 (IGF2 mRNA-binding protein 2) (IMP-2) (Hepatocellular carcinoma autoantigen p62) (IGF-II mRNA-binding protein 2) (VICKZ family member 2)	IGF2BP2	2	14	28.5	66.121	0.81592	20.224	46	0.71582	26.463	46	3192	53129
P42126	Enoyl-CoA delta isomerase 1, mitochondrial (EC 5.3.3.8) (3,2-trans-enoyl-CoA isomerase) (Delta(3),Delta(2)-enoyl-CoA isomerase) (D3,D2-enoyl-CoA isomerase) (Dodecenoyl-CoA isomerase)	ECI1	3	4	14.2	32.816	1.0627	21.871	11	0.71636	21.527	11	1070	28798
Q9H479	Fructosamine-3-kinase (EC 2.7.1.171) (Protein-psicosamine 3-kinase FN3K) (Protein-ribulosamine 3-kinase FN3K) (EC 2.7.1.172)	FN3K	1	3	13.3	35.171	0.64762	6.4356	2	0.71708	31.341	2	2712	115223
K4DIB8	Mitochondrial glutamate carrier 1 (Fragment)	SLC25A22	16	3	23.7	18.898	0.89188	15.815	6	0.71762	23.059	6	2739	90084
Q9BWJ5	Splicing factor 3B subunit 5 (SF3b5) (Pre-mRNA-splicing factor SF3b 10 kDa subunit)	SF3B5	1	3	45.3	10.135	0.74041	14.817	2	0.71793	2.127	2	2622	142183
P49591	Serine--tRNA ligase, cytoplasmic (EC 6.1.1.11) (Seryl-tRNA synthetase) (SerRS) (Seryl-tRNA(Ser/Sec) synthetase)	SARS1	2	10	26.8	58.777	0.90201	17.871	27	0.71972	17.776	27	1160	45553
A0A0R4J2E8	Matrin-3	MATR3	21	21	28.9	94.622	0.90041	47.452	66	0.71974	37.863	66	1088	16290
P51570	Galactokinase (EC 2.7.1.6) (Galactose kinase)	GALK1	4	12	30.4	42.272	0.66751	23.942	15	0.72028	53.518	14	1206	1952
P10599	Thioredoxin (Trx) (ATL-derived factor) (ADF) (Surface-associated sulphydryl protein) (SASP) (allergen Hom s Trx)	TXN	1	9	52.4	11.737	1.2774	35.064	34	0.72065	21.574	34	652	27964
Q9Y5Z4	Heme-binding protein 2 (Placental protein 23) (PP23) (Protein SOUL)	HEBP2	2	2	13.2	22.875	0.85059	10.576	2	0.72074	10.218	2	3171	17353
P84022	Mothers against decapentaplegic homolog 3 (MAD homolog 3) (Mad3) (Mothers against DPP homolog 3) (hMAD-3) (JV15-2) (SMAD family member 3) (SMAD 3) (Smad3) (hSMAD3)	SMAD3	6	2	5.9	48.08	0.77546	10.668	2	0.72086	23.062	2	1487	175627
Q9UIJ7	GTP:AMP phosphotransferase AK3, mitochondrial (EC 2.7.4.10) (Adenylate kinase 3) (AK 3) (Adenylate kinase 3 alpha-like 1)	AK3	1	9	42.3	25.565	0.77502	18.776	23	0.72092	23.789	23	2987	25628
Q8N163	Cell cycle and apoptosis regulator protein 2 (Cell division cycle and apoptosis regulator protein 2) (DBIRD complex subunit KIAA1967) (Deleted in breast cancer gene 1 protein) (DBC-1) (DBC.1) (NET35) (p30 DBC)	CCAR2	10	15	26.3	102.9	0.79787	26.569	29	0.72098	26.666	29	2151	906
Q96GW9	Methionine--tRNA ligase, mitochondrial (EC 6.1.1.10) (Methionyl-tRNA synthetase 2) (Mitochondrial methionyl-tRNA synthetase) (MtMetRS)	MARS2	1	3	9.1	66.59	0.82509	14.494	3	0.72147	22.364	3	2429	18716
Q9BY49	Peroxisomal trans-2-enoyl-CoA reductase (TERP) (EC 1.3.1.38) (2,4-dienoyl-CoA reductase-related protein) (DCR-RP) (HPDHase) (Short chain dehydrogenase/reductase family 29C member 1) (pVI-ARL)	PECR	2	6	30.4	32.544	0.76354	46.88	9	0.72192	31.4	9	2639	8126
E7ETB3	Aspartyl aminopeptidase (EC 3.4.11.21)	DNPEP	10	8	22.3	54.502	0.84252	20.384	11	0.72192	17.866	11	3237	74313
P36551	Oxygen-dependent coproporphyrinogen-III oxidase, mitochondrial (COX) (Coprogen oxidase) (Coproporphyrinogenase) (EC 1.3.3.3)	CPOX	3	9	24.7	50.151	1.0589	38.626	12	0.72211	22.005	12	1019	9475
P30038	Delta-1-pyrroline-5-carboxylate dehydrogenase, mitochondrial (P5C dehydrogenase) (EC 1.2.1.88) (Aldehyde dehydrogenase family 4 member A1) (L-glutamate gamma-semialdehyde dehydrogenase)	ALDH4A1	2	16	34.8	61.719	0.82906	27.279	42	0.72222	37.621	42	923	877
Q8NCW5	NAD(P)H-hydrate epimerase (EC 5.1.99.6) (Apolipoprotein A-I-binding protein) (AI-BP) (NAD(P)HX epimerase) (YjeF N-terminal domain-containing protein 1) (YjeF_N1)	NAXE	3	4	17.4	31.674	0.87885	8.4928	3	0.72226	20.228	3	2206	70476
P49321	Nuclear autoantigenic sperm protein (NASP)	NASP	13	19	39.7	85.237	0.82445	21.583	42	0.7223	23.784	42	1148	3020
H0Y612	E3 ubiquitin-protein ligase TRIM33 (Fragment)	TRIM33	2	1	1.5	98.891	0.83767	12.4	2	0.7227	5.2335	2	3047	122740
Q8IWX8	Calcium homeostasis endoplasmic reticulum protein (ERPROT 213-21) (SR-related CTD-associated factor 6)	CHERP	2	2	3.2	103.7	0.89803	5.9088	3	0.72362	13.383	3	2128	108402
P45954	Short/branched chain specific acyl-CoA dehydrogenase, mitochondrial (SBCAD) (EC 1.3.8.5) (2-methyl branched chain acyl-CoA dehydrogenase) (2-MEBCAD) (2-methylbutyryl-coenzyme A dehydrogenase) (2-methylbutyryl-CoA dehydrogenase)	ACADSB	1	14	36.6	47.485	0.99318	33.101	76	0.72398	29.953	76	1096	21629
P19174	1-phosphatidylinositol 4,5-bisphosphate phosphodiesterase gamma-1 (EC 3.1.4.11) (PLC-148) (Phosphoinositide phospholipase C-gamma-1) (Phospholipase C-II) (PLC-II) (Phospholipase C-gamma-1) (PLC-gamma-1)	PLCG1	1	3	4.1	148.53	0.5441	20.372	2	0.72434	1.2655	2	787	151678
X6RGJ2	Deleted.	0	6	8	28.4	36.514	0.86072	14.409	17	0.72466	27.147	17	1931	14632
Q05655	Protein kinase C delta type (EC 2.7.11.13) (Tyrosine-protein kinase PRKCD) (EC 2.7.10.2) (nPKC-delta) [Cleaved into: Protein kinase C delta type regulatory subunit; Protein kinase C delta type catalytic subunit (Sphingosine-dependent protein kinase-1) (SDK1)]	PRKCD	1	1	1.8	77.504	0.68098	1.9327	2	0.72512	14.992	2	1550	119540
O00273	DNA fragmentation factor subunit alpha (DNA fragmentation factor 45 kDa subunit) (DFF-45) (Inhibitor of CAD) (ICAD)	DFFA	2	2	10	36.521	0.93935	16.275	5	0.72533	9.1936	5	121	51246
A0A1B0GTB8	Carnitine O-palmitoyltransferase 2, mitochondrial	CPT2	6	5	10.4	71.181	1.048	10.09	8	0.72558	31.084	8	856	8606
Q16401	26S proteasome non-ATPase regulatory subunit 5 (26S protease subunit S5 basic) (26S proteasome subunit S5B)	PSMD5	2	5	14.1	56.195	1.151	19.665	8	0.7256	25.493	8	1841	2347
Q8WWM7	Ataxin-2-like protein (Ataxin-2 domain protein) (Ataxin-2-related protein)	ATXN2L	3	11	20.3	113.37	0.9053	36.217	3	0.72576	35.077	3	2280	43965
Q9H8S9	MOB kinase activator 1A (Mob1 alpha) (Mob1A) (Mob1 homolog 1B) (Mps one binder kinase activator-like 1B)	MOB1A	2	1	5.1	25.079	0.87447	4.6337	4	0.72583	13.607	4	2049	46584
P09104	Gamma-enolase (EC 4.2.1.11) (2-phospho-D-glycerate hydro-lyase) (Enolase 2) (Neural enolase) (Neuron-specific enolase) (NSE)	ENO2	4	7	26.3	47.268	0.75597	32.513	3	0.72584	21.397	3	620	3492
Q96GK7	Fumarylacetoacetate hydrolase domain-containing protein 2A (EC 3.-.-.-)	FAHD2A	3	3	14.6	34.596	0.80668	25.374	11	0.72603	19.641	11	2426	12427
O75533	Splicing factor 3B subunit 1 (Pre-mRNA-splicing factor SF3b 155 kDa subunit) (SF3b155) (Spliceosome-associated protein 155) (SAP 155)	SF3B1	3	22	24.5	145.83	0.79236	39.564	26	0.7262	41.58	26	356	1235
A2A2D0	Stathmin (Fragment)	STMN1	2	4	42.4	9.7931	0.70082	41.017	9	0.72629	21.523	9	756	20869
P38435	Vitamin K-dependent gamma-carboxylase (EC 4.1.1.90) (Gamma-glutamyl carboxylase) (Peptidyl-glutamate 4-carboxylase) (Vitamin K gamma glutamyl carboxylase)	GGCX	2	5	8.6	87.56	0.67381	19.638	4	0.72648	11.375	4	1036	67132
P21695	Glycerol-3-phosphate dehydrogenase [NAD(+)], cytoplasmic (GPD-C) (GPDH-C) (EC 1.1.1.8)	GPD1	1	4	19.5	37.567	0.94694	19.273	8	0.72653	14.315	8	821	53642
Q9Y679	Lipid droplet-regulating VLDL assembly factor AUP1 (Ancient ubiquitous protein 1)	AUP1	1	4	14.4	45.786	0.72154	19.503	9	0.72679	23.397	9	3177	59350
F5GY37	Prohibitin	PHB2	7	13	50.6	29.723	1.1223	38.206	38	0.72683	30.991	38	2522	19208
Q13595	Transformer-2 protein homolog alpha (TRA-2 alpha) (TRA2-alpha) (Transformer-2 protein homolog A)	TRA2A	1	3	20.2	32.688	0.86745	17.701	3	0.7269	11.773	3	1673	9948
P30405	Peptidyl-prolyl cis-trans isomerase F, mitochondrial (PPIase F) (EC 5.2.1.8) (Cyclophilin D) (CyP-D) (CypD) (Cyclophilin F) (Mitochondrial cyclophilin) (CyP-M) (Rotamase F)	PPIF	3	9	58	22.04	0.84912	40.619	35	0.72705	23.68	35	940	58983
O00148	ATP-dependent RNA helicase DDX39A (EC 3.6.4.13) (DEAD box protein 39) (Nuclear RNA helicase URH49)	DDX39A	8	11	34	49.129	0.87799	14.867	2	0.72738	26.573	2	104	6531
Q969X5	Endoplasmic reticulum-Golgi intermediate compartment protein 1 (ER-Golgi intermediate compartment 32 kDa protein) (ERGIC-32)	ERGIC1	3	3	11.4	32.592	0.75149	14.405	11	0.72818	21.92	11	2364	95371
P51970	NADH dehydrogenase [ubiquinone] 1 alpha subcomplex subunit 8 (Complex I-19kD) (CI-19kD) (Complex I-PGIV) (CI-PGIV) (NADH-ubiquinone oxidoreductase 19 kDa subunit)	NDUFA8	1	3	30.2	20.105	0.71488	16.263	8	0.72823	15.394	8	1220	116524
P00352	Retinal dehydrogenase 1 (RALDH 1) (RalDH1) (EC 1.2.1.-) (EC 1.2.1.36) (ALDH-E1) (ALHDII) (Aldehyde dehydrogenase family 1 member A1) (Aldehyde dehydrogenase, cytosolic)	ALDH1A1	6	25	58.5	54.861	1.3041	26.426	120	0.72836	25.125	120	480	17086
B4DK69	Aldo-keto reductase family 1 member C2 (cDNA FLJ52680, highly similar to Aldo-keto reductase family 1 member C2)	AKR1C2	4	14	47.1	33.834	2.2371	5.9535	6	0.72848	42.334	6	1237	10318
P04114	Apolipoprotein B-100 (Apo B-100) [Cleaved into: Apolipoprotein B-48 (Apo B-48)]	APOB	3	25	7.6	515.6	0.91309	30.495	32	0.72872	29.113	32	533	5525
O75844	CAAX prenyl protease 1 homolog (EC 3.4.24.84) (Farnesylated proteins-converting enzyme 1) (FACE-1) (Prenyl protein-specific endoprotease 1) (Zinc metalloproteinase Ste24 homolog)	ZMPSTE24	1	2	5.9	54.812	0.85109	10.972	3	0.72889	12.915	3	371	168508
P37059	Estradiol 17-beta-dehydrogenase 2 (EC 1.1.1.62) (17-beta-hydroxysteroid dehydrogenase type 2) (17-beta-HSD 2) (20 alpha-hydroxysteroid dehydrogenase) (20-alpha-HSD) (E2DH) (Microsomal 17-beta-hydroxysteroid dehydrogenase) (Short chain dehydrogenase/reductase family 9C member 2) (Testosterone 17-beta-dehydrogenase) (EC 1.1.1.239)	HSD17B2	4	4	15.2	42.785	0.8317	25.475	9	0.72893	27.532	9	1027	130233
E9PBT8	Inactive C-alpha-formylglycine-generating enzyme 2	SUMF2	13	2	11.2	25.829	0.71385	16.223	3	0.72907	24.029	3	2188	57448
Q15042	Rab3 GTPase-activating protein catalytic subunit (RAB3 GTPase-activating protein 130 kDa subunit) (Rab3-GAP p130) (Rab3-GAP)	RAB3GAP1	1	2	3.5	110.52	0.82058	6.692	2	0.72919	22.027	2	1769	62233
D6RDM7	Ubiquitin-conjugating enzyme E2 K (Fragment)	UBE2K	2	4	45.5	14.035	0.89166	16.691	5	0.72931	18.518	5	1328	65348
A0A286YF22	D-3-phosphoglycerate dehydrogenase (EC 1.1.1.95)	PHGDH	14	19	41.3	55.938	0.9374	18.521	77	0.72999	20.794	77	225	6824
A0A1W2PQ90	Zinc-hook domain-containing protein	0	4	5	6.1	142.94	0.75913	15.28	9	0.73001	20.712	9	2332	28412
Q9Y587	AP-4 complex subunit sigma-1 (AP-4 adaptor complex subunit sigma-1) (Adaptor-related protein complex 4 subunit sigma-1) (Sigma-1 subunit of AP-4) (Sigma-4-adaptin) (Sigma4-adaptin)	AP4S1	1	1	6.9	17.005	0.89204	7.6483	2	0.7302	6.545	2	3154	90197
E9PC05	Integrin-linked kinase-associated serine/threonine phosphatase 2C (Fragment)	ILKAP	4	2	11.3	23.092	0.81271	18.226	5	0.73021	18.224	5	2678	52824
O60488	Long-chain-fatty-acid--CoA ligase 4 (EC 6.2.1.3) (Arachidonate--CoA ligase) (EC 6.2.1.15) (Long-chain acyl-CoA synthetase 4) (LACS 4)	ACSL4	6	23	40.2	79.187	0.83309	28.158	98	0.73036	31.121	98	287	12108
C9IZC9	2-amino-3-ketobutyrate coenzyme A ligase, mitochondrial (Fragment)	GCAT	3	1	5.6	19.177	0.92116	9.7542	4	0.73061	15.673	4	359	56074
E7ESY4	Metastasis-associated protein MTA1	MTA1	4	3	5.7	79.372	0.69716	2.3462	2	0.73099	17.555	2	1639	11476
Q99575	Ribonucleases P/MRP protein subunit POP1 (hPOP1) (EC 3.1.26.5)	POP1	2	5	6.5	114.71	1.1654	14.885	5	0.73119	50.547	5	2516	95326
P40937	Replication factor C subunit 5 (Activator 1 36 kDa subunit) (A1 36 kDa subunit) (Activator 1 subunit 5) (Replication factor C 36 kDa subunit) (RF-C 36 kDa subunit) (RFC36)	RFC5	2	2	7.6	38.496	0.77969	34.461	4	0.73136	32.349	4	1057	14478
Q8TD30	Alanine aminotransferase 2 (ALT2) (EC 2.6.1.2) (Glutamate pyruvate transaminase 2) (GPT 2) (Glutamic--alanine transaminase 2) (Glutamic--pyruvic transaminase 2)	GPT2	3	11	41.3	57.903	0.77006	17.072	40	0.73177	27.325	40	2248	16957
K7EJE8	Lon protease homolog, mitochondrial (EC 3.4.21.53) (Lon protease-like protein) (LONP) (Mitochondrial ATP-dependent protease Lon) (Serine protease 15)	LONP1	7	19	28.7	93.296	0.93846	35.468	35	0.73288	29.462	35	3269	18774
A0A0C4DGQ6	Regulation of nuclear pre-mRNA domain-containing protein 1A	RPRD1A	4	2	9	32.916	0.76993	7.5926	3	0.73291	4.9096	3	2471	81414
O15355	Protein phosphatase 1G (EC 3.1.3.16) (Protein phosphatase 1C) (Protein phosphatase 2C isoform gamma) (PP2C-gamma) (Protein phosphatase magnesium-dependent 1 gamma)	PPM1G	1	10	24.7	59.271	0.74608	16.653	14	0.73358	20.616	14	209	13066
P24752	Acetyl-CoA acetyltransferase, mitochondrial (EC 2.3.1.9) (Acetoacetyl-CoA thiolase) (T2)	ACAT1	4	21	53.9	45.199	0.87828	39.704	96	0.73359	30.528	96	862	3588
A0A2R8Y7S2	Transcription activator BRG1	SMARCA4	24	4	2.9	184.85	0.80109	32.468	7	0.73381	36.853	7	1204	69270
P51812	Ribosomal protein S6 kinase alpha-3 (S6K-alpha-3) (EC 2.7.11.1) (90 kDa ribosomal protein S6 kinase 3) (p90-RSK 3) (p90RSK3) (Insulin-stimulated protein kinase 1) (ISPK-1) (MAP kinase-activated protein kinase 1b) (MAPK-activated protein kinase 1b) (MAPKAP kinase 1b) (MAPKAPK-1b) (Ribosomal S6 kinase 2) (RSK-2) (pp90RSK2)	RPS6KA3	11	15	25	83.735	1.0915	33.688	28	0.73396	28.179	28	1216	5347
Q71UI9	Histone H2A.V (H2A.F/Z) (H2A.Z variant histone 2)	H2AZ2	4	4	31.2	13.509	0.7294	22.984	43	0.73436	12.542	43	640	8857
Q96LJ7	Dehydrogenase/reductase SDR family member 1 (EC 1.1.-.-) (Short chain dehydrogenase/reductase family 19C member 1)	DHRS1	2	5	27.8	33.909	0.64091	10.125	4	0.73454	30.833	4	2461	28618
Q9H6S3	Epidermal growth factor receptor kinase substrate 8-like protein 2 (EPS8-like protein 2) (Epidermal growth factor receptor pathway substrate 8-related protein 2) (EPS8-related protein 2)	EPS8L2	4	4	11	80.62	0.65315	13.686	2	0.7348	16.491	2	2726	160574
B8ZZF8	U6 snRNA-associated Sm-like protein LSm5	LSM5	2	1	29.7	7.0202	0.69216	7.3274	8	0.73513	12.19	8	3147	2133
Q9Y4F1	FERM, ARHGEF and pleckstrin domain-containing protein 1 (Chondrocyte-derived ezrin-like protein) (FERM, RhoGEF and pleckstrin domain-containing protein 1) (Pleckstrin homology domain-containing family C member 2) (PH domain-containing family C member 2)	FARP1	6	4	7.8	118.63	0.62665	28.662	3	0.73556	4.911	3	3137	34200
C9JMA6	Cystathionine beta-synthase (Fragment)	CBS	3	2	14.1	19.087	0.70822	18.384	4	0.73674	18.125	4	645	92177
O95292	Vesicle-associated membrane protein-associated protein B/C (VAMP-B/VAMP-C) (VAMP-associated protein B/C) (VAP-B/VAP-C)	VAPB	2	4	18.1	27.228	0.68679	9.9848	7	0.7368	14.731	7	428	59821
P10644	cAMP-dependent protein kinase type I-alpha regulatory subunit (Tissue-specific extinguisher 1) (TSE1)	PRKAR1A	13	4	14.2	42.981	0.95565	29.82	17	0.73689	29.145	17	656	91998
Q8TAV3	Cytochrome P450 2W1 (EC 1.14.14.-) (CYPIIW1)	CYP2W1	3	6	16.5	53.843	0.79512	21.124	7	0.73805	13.563	7	2236	13925
P33993	DNA replication licensing factor MCM7 (EC 3.6.4.12) (CDC47 homolog) (P1.1-MCM3)	MCM7	2	7	12	81.307	0.89483	26.42	10	0.73835	28.852	10	981	8330
H3BQF1	Adenine phosphoribosyltransferase (Fragment)	APRT	5	5	37.2	16.323	0.75827	24.068	20	0.73862	21.389	20	591	1576
Q7L266	Isoaspartyl peptidase/L-asparaginase (EC 3.4.19.5) (EC 3.5.1.1) (Asparaginase-like protein 1) (Beta-aspartyl-peptidase) (Isoaspartyl dipeptidase) (L-asparagine amidohydrolase) [Cleaved into: Isoaspartyl peptidase/L-asparaginase alpha chain; Isoaspartyl peptidase/L-asparaginase beta chain]	ASRGL1	4	6	35.4	32.054	0.86923	33.614	15	0.7387	17.642	15	2040	34809
A0A087WT34	Methyl-CpG-binding domain protein 3 (Fragment)	MBD3	5	1	11.5	14.46	0.75251	22.287	2	0.73879	1.3127	2	471	128981
F5GZS6	4F2 cell-surface antigen heavy chain	SLC3A2	7	20	36.6	64.872	0.9841	41.359	53	0.73879	31.17	53	602	5185
E9PKL9	GDP-4-keto-6-deoxy-D-mannose-3,5-epimerase-4-reductase (EC 1.1.1.271) (Fragment)	GFUS	6	3	17.2	29.666	0.96768	25.796	4	0.73884	22.867	4	1678	92931
Q16513	Serine/threonine-protein kinase N2 (EC 2.7.11.13) (PKN gamma) (Protein kinase C-like 2) (Protein-kinase C-related kinase 2)	PKN2	2	5	11	112.03	0.48499	23.375	3	0.73888	17.422	3	1842	11365
E9PF10	Nuclear pore complex protein Nup155	NUP155	3	8	11.2	148.09	0.88219	22.246	10	0.73889	27.208	10	364	27794
Q8NBF2	NHL repeat-containing protein 2	NHLRC2	1	5	10.1	79.443	1.0291	24.606	5	0.73976	11.701	5	2185	10969
Q13228	Methanethiol oxidase (MTO) (EC 1.8.3.4) (56 kDa selenium-binding protein) (SBP56) (SP56) (Selenium-binding protein 1)	SELENBP1	6	5	15.3	52.39	0.87135	20.418	6	0.73982	22.329	6	1630	57278
Q9NWU1	3-oxoacyl-[acyl-carrier-protein] synthase, mitochondrial (EC 2.3.1.41) (Beta-ketoacyl-ACP synthase)	OXSM	3	3	9.8	48.842	0.94341	9.3767	3	0.74029	21.194	3	2869	73062
O43776	Asparagine--tRNA ligase, cytoplasmic (EC 6.1.1.22) (Asparaginyl-tRNA synthetase) (AsnRS) (Asparaginyl-tRNA synthetase 1)	NARS1	6	13	26.5	62.942	0.89351	32.002	17	0.74069	21.743	17	261	14400
P13804	Electron transfer flavoprotein subunit alpha, mitochondrial (Alpha-ETF)	ETFA	8	12	48.3	35.079	0.77006	27.411	82	0.74108	17.69	82	707	2864
Q9UBQ7	Glyoxylate reductase/hydroxypyruvate reductase (EC 1.1.1.79) (EC 1.1.1.81)	GRHPR	2	9	39.3	35.668	0.86924	33.022	15	0.74143	30.513	15	2945	836
O60568	Multifunctional procollagen lysine hydroxylase and glycosyltransferase LH3 [Includes: Procollagen-lysine,2-oxoglutarate 5-dioxygenase 3 (EC 1.14.11.4) (Lysyl hydroxylase 3) (LH3); Procollagen glycosyltransferase (EC 2.4.1.50) (EC 2.4.1.66) (Galactosylhydroxylysine-glucosyltransferase) (Procollagen galactosyltransferase) (Procollagen glucosyltransferase)]	PLOD3	4	6	11.7	84.784	0.69115	32.123	10	0.74148	34.71	10	292	38922
E7ETN3	C3/C5 convertase (EC 3.4.21.47) (Complement factor B) (Complement factor B Ba fragment) (Complement factor B Bb fragment)	0	4	3	4.1	124.02	0.9202	10.684	3	0.74162	7.18	3	3228	25705
H7C048	Deleted.	0	12	1	8.3	18.257	0.88362	24.929	2	0.74204	17.484	2	2356	80308
Q9UEY8	Gamma-adducin (Adducin-like protein 70)	ADD3	1	4	8.4	79.154	0.91752	9.0905	2	0.74297	13.618	2	2958	70335
P00439	Phenylalanine-4-hydroxylase (PAH) (EC 1.14.16.1) (Phe-4-monooxygenase)	PAH	6	6	17.7	51.861	0.85492	26.201	11	0.74343	21.098	11	487	84050
P32119	Peroxiredoxin-2 (EC 1.11.1.24) (Natural killer cell-enhancing factor B) (NKEF-B) (PRP) (Thiol-specific antioxidant protein) (TSA) (Thioredoxin peroxidase 1) (Thioredoxin-dependent peroxide reductase 1) (Thioredoxin-dependent peroxiredoxin 2)	PRDX2	2	12	56.1	21.892	0.97842	36.972	54	0.74423	25.692	54	967	22295
Q99538	Legumain (EC 3.4.22.34) (Asparaginyl endopeptidase) (Protease, cysteine 1)	LGMN	4	2	5.8	49.411	0.82627	15.685	5	0.7445	31.234	5	2512	40098
H3BQZ7	HCG2044799 (HNRNPUL2-BSCL2 readthrough (NMD candidate))	HNRNPUL2-BSCL2	2	11	19.3	84.69	0.82122	30.355	22	0.74461	22.83	22	1877	14254
P51858	Hepatoma-derived growth factor (HDGF) (High mobility group protein 1-like 2) (HMG-1L2)	HDGF	1	3	21.7	26.788	0.86966	21.961	8	0.74482	28.829	8	1218	34076
Q9UGV2	Protein NDRG3 (N-myc downstream-regulated gene 3 protein)	NDRG3	3	2	7.7	41.408	0.70112	25.963	4	0.74485	26.177	4	2964	125050
Q9BY43	Charged multivesicular body protein 4a (Chromatin-modifying protein 4a) (CHMP4a) (SNF7 homolog associated with Alix-2) (SNF7-1) (hSnf-1) (Vacuolar protein sorting-associated protein 32-1) (Vps32-1) (hVps32-1)	CHMP4A	3	3	22.1	25.098	0.64928	6.7886	3	0.7452	42.202	3	2637	40887
Q16698	2,4-dienoyl-CoA reductase, mitochondrial (EC 1.3.1.34) (2,4-dienoyl-CoA reductase [NADPH]) (4-enoyl-CoA reductase [NADPH]) (Short chain dehydrogenase/reductase family 18C member 1)	DECR1	6	11	40.9	36.067	0.79689	20.862	33	0.74642	29.139	33	1860	16619
Q07954	Prolow-density lipoprotein receptor-related protein 1 (LRP-1) (Alpha-2-macroglobulin receptor) (A2MR) (Apolipoprotein E receptor) (APOER) (CD antigen CD91) [Cleaved into: Low-density lipoprotein receptor-related protein 1 85 kDa subunit (LRP-85); Low-density lipoprotein receptor-related protein 1 515 kDa subunit (LRP-515); Low-density lipoprotein receptor-related protein 1 intracellular domain (L…	LRP1	3	3	1	504.6	0.7638	32.459	2	0.74707	70.142	2	1567	1959
P09525	Annexin A4 (35-beta calcimedin) (Annexin IV) (Annexin-4) (Carbohydrate-binding protein p33/p41) (Chromobindin-4) (Endonexin I) (Lipocortin IV) (P32.5) (PP4-X) (Placental anticoagulant protein II) (PAP-II) (Protein II)	ANXA4	3	12	43.9	35.882	1.0188	17.43	59	0.74777	26.674	59	629	2581
Q9H307	Pinin (140 kDa nuclear and cell adhesion-related phosphoprotein) (Desmosome-associated protein) (Domain-rich serine protein) (DRS protein) (DRSP) (Melanoma metastasis clone A protein) (Nuclear protein SDK3) (SR-like protein)	PNN	1	4	8.9	81.627	1.109	40.665	2	0.74788	8.1841	2	2699	56847
F8W7Q4	Protein FAM162A	FAM162A	3	6	34	16.515	1.0158	59.27	9	0.7479	18.109	9	2367	42360
O75909	Cyclin-K	CCNK	1	1	4.1	64.239	0.80978	0.74419	2	0.74796	1.1875	2	376	105189
A0A140TA44	C4a anaphylatoxin (Complement C4 gamma chain)	C4A	11	19	17.3	187.66	0.91529	40.988	35	0.74811	36.169	36	3215	805
Q8IX12	Cell division cycle and apoptosis regulator protein 1 (Cell cycle and apoptosis regulatory protein 1) (CARP-1) (Death inducer with SAP domain)	CCAR1	6	10	13	132.82	0.72361	18.432	7	0.74862	21.541	7	2130	34921
Q9NZI8	Insulin-like growth factor 2 mRNA-binding protein 1 (IGF2 mRNA-binding protein 1) (IMP-1) (IMP1) (Coding region determinant-binding protein) (CRD-BP) (IGF-II mRNA-binding protein 1) (VICKZ family member 1) (Zipcode-binding protein 1) (ZBP-1)	IGF2BP1	1	21	41.9	63.48	0.78582	24.219	119	0.74879	22.746	119	2907	10585
E7EQG2	RNA helicase (EC 3.6.4.13)	EIF4A2	2	9	25.1	41.29	0.91509	7.955	4	0.74888	27.895	4	1714	58287
E7EV99	Alpha-adducin	ADD1	7	6	17.7	70.055	0.6999	24.2	7	0.74917	20.437	7	1006	52688
O15173	Membrane-associated progesterone receptor component 2 (Progesterone membrane-binding protein) (Steroid receptor protein DG6)	PGRMC2	2	5	26	23.818	0.84853	18.276	13	0.7496	36.48	13	199	31277
P26196	Probable ATP-dependent RNA helicase DDX6 (EC 3.6.4.13) (ATP-dependent RNA helicase p54) (DEAD box protein 6) (Oncogene RCK)	DDX6	2	8	29.2	54.416	1.0301	42.295	11	0.74973	31.584	11	876	72207
Q9BVJ6	U3 small nucleolar RNA-associated protein 14 homolog A (Antigen NY-CO-16) (Serologically defined colon cancer antigen 16)	UTP14A	3	5	9.6	87.977	1.0167	26.334	9	0.74976	30.551	9	2614	37714
Q14008	Cytoskeleton-associated protein 5 (Colonic and hepatic tumor overexpressed gene protein) (Ch-TOG)	CKAP5	4	8	6.6	225.49	0.77242	29.256	8	0.75	76.49	8	1694	28652
Q96C23	Galactose mutarotase (EC 5.1.3.3) (Aldose 1-epimerase)	GALM	4	6	22.5	37.765	0.88883	25.033	19	0.75006	32.205	19	2383	24939
O95571	Persulfide dioxygenase ETHE1, mitochondrial (EC 1.13.11.18) (Ethylmalonic encephalopathy protein 1) (Hepatoma subtracted clone one protein) (Sulfur dioxygenase ETHE1)	ETHE1	4	3	13	27.873	0.69244	24.132	6	0.75034	25.804	6	447	42019
Q92820	Gamma-glutamyl hydrolase (EC 3.4.19.9) (Conjugase) (GH) (Gamma-Glu-X carboxypeptidase)	GGH	1	4	15.1	35.964	1.2264	37.113	4	0.75042	24.414	4	2330	54823
P35637	RNA-binding protein FUS (75 kDa DNA-pairing protein) (Oncogene FUS) (Oncogene TLS) (POMp75) (Translocated in liposarcoma protein)	FUS	2	8	16.5	53.425	0.81488	40.247	21	0.75051	20.713	21	1008	1532
P49756	RNA-binding protein 25 (Arg/Glu/Asp-rich protein of 120 kDa) (RED120) (Protein S164) (RNA-binding motif protein 25) (RNA-binding region-containing protein 7)	RBM25	3	3	3.9	100.18	0.74902	15.022	2	0.75064	8.8513	2	1167	52698
Q96TC7	Regulator of microtubule dynamics protein 3 (RMD-3) (hRMD-3) (Cerebral protein 10) (Protein FAM82A2) (Protein FAM82C) (Protein tyrosine phosphatase-interacting protein 51) (TCPTP-interacting protein 51)	RMDN3	4	3	8.9	52.118	1.0573	70.048	3	0.75121	28.461	3	2499	26071
P30419	Glycylpeptide N-tetradecanoyltransferase 1 (EC 2.3.1.97) (Myristoyl-CoA:protein N-myristoyltransferase 1) (NMT 1) (Type I N-myristoyltransferase) (Peptide N-myristoyltransferase 1)	NMT1	5	7	16.7	56.806	0.70709	14.976	7	0.75137	20.707	7	941	10488
A0A3B3ITP6	DNA helicase (EC 3.6.4.12)	MCM4	6	7	14.7	83.053	1.0077	2.5701	2	0.75143	6.431	2	979	8317
A0A1W2PNM1	Hydroxyacyl-coenzyme A dehydrogenase, mitochondrial (Fragment)	HADH	9	5	25.1	29.096	0.91877	7.8345	8	0.75196	7.2498	8	1870	13762
E7EPM6	Long-chain-fatty-acid--CoA ligase 1	ACSL1	7	9	14.6	74.281	0.86511	18.437	15	0.75235	13.946	15	973	68226
Q10713	Mitochondrial-processing peptidase subunit alpha (Alpha-MPP) (Inactive zinc metalloprotease alpha) (P-55)	PMPCA	1	3	9.3	58.252	0.69023	12.294	4	0.75247	5.5393	4	1587	69036
Q9UQE7	Structural maintenance of chromosomes protein 3 (SMC protein 3) (SMC-3) (Basement membrane-associated chondroitin proteoglycan) (Bamacan) (Chondroitin sulfate proteoglycan 6) (Chromosome-associated polypeptide) (hCAP)	SMC3	1	12	14.5	141.54	0.83196	35.542	14	0.7526	38.285	14	3053	13090
O43852	Calumenin (Crocalbin) (IEF SSP 9302)	CALU	2	11	44.1	37.106	0.86769	24.711	20	0.7531	31.859	20	270	49486
Q9UL12	Sarcosine dehydrogenase, mitochondrial (SarDH) (EC 1.5.8.3) (BPR-2)	SARDH	6	5	9.7	101.04	0.91259	15.84	4	0.75332	30.206	4	3012	71561
A0A087X1K9	Acyl-protein thioesterase 1	LYPLA1	5	4	24.1	17.981	0.77623	36.744	3	0.75348	35.818	3	361	20550
J3KN66	Torsin-1A-interacting protein 1	TOR1AIP1	6	9	23.5	67.821	0.71625	17.806	12	0.75358	28.51	12	3267	23568
Q09028	Histone-binding protein RBBP4 (Chromatin assembly factor 1 subunit C) (CAF-1 subunit C) (Chromatin assembly factor I p48 subunit) (CAF-I 48 kDa subunit) (CAF-I p48) (Nucleosome-remodeling factor subunit RBAP48) (Retinoblastoma-binding protein 4) (RBBP-4) (Retinoblastoma-binding protein p48)	RBBP4	5	7	26.6	47.655	1.2897	50.032	12	0.75379	44.291	12	1580	85452
H3BV80	RNA-binding protein with serine-rich domain 1	RNPS1	15	4	18.5	24.561	0.8857	7.0569	5	0.75383	7.958	5	1794	76261
Q9Y2P8	RNA 3'-terminal phosphate cyclase-like protein	RCL1	2	4	14.7	40.842	0.95458	10.367	5	0.75389	12.223	5	3079	23558
A0A0A6YYL4	Coronin	CORO7-PAM16	6	3	7	114.16	0.85559	21.674	5	0.75403	33.502	5	3209	125705
Q86UP2	Kinectin (CG-1 antigen) (Kinesin receptor)	KTN1	8	15	17.5	156.27	0.84793	36.278	19	0.7544	26.242	19	2092	19334
Q96EY1	DnaJ homolog subfamily A member 3, mitochondrial (DnaJ protein Tid-1) (hTid-1) (Hepatocellular carcinoma-associated antigen 57) (Tumorous imaginal discs protein Tid56 homolog)	DNAJA3	1	3	8.3	52.488	0.75296	10.773	4	0.75522	17.789	4	2407	67180
O75367	Core histone macro-H2A.1 (Histone macroH2A1) (mH2A1) (Histone H2A.y) (H2A/y) (Medulloblastoma antigen MU-MB-50.205)	MACROH2A1	3	9	31.5	39.617	0.91625	29.315	36	0.7554	21.139	36	339	2505
Q99541	Perilipin-2 (Adipophilin) (Adipose differentiation-related protein) (ADRP)	PLIN2	4	11	30	48.075	0.90251	20.69	34	0.75623	23.588	34	2513	21724
P35659	Protein DEK	DEK	6	9	29.1	42.674	0.93824	34.996	18	0.75647	27.311	18	1010	49266
Q9BUB7	Transmembrane protein 70, mitochondrial	TMEM70	2	4	19.6	28.969	2.0023	5.4852	2	0.75648	62.615	2	2600	11819
Q68CZ2	Tensin-3 (Tensin-like SH2 domain-containing protein 1) (Tumor endothelial marker 6)	TNS3	13	13	18.6	155.26	0.68071	30.464	6	0.75667	48.995	6	1965	4254
P49792	E3 SUMO-protein ligase RanBP2 (EC 2.3.2.-) (358 kDa nucleoporin) (Nuclear pore complex protein Nup358) (Nucleoporin Nup358) (Ran-binding protein 2) (RanBP2) (p270)	RANBP2	12	21	9.6	358.2	0.82318	23.344	18	0.75767	60.329	18	1171	17730
P42785	Lysosomal Pro-X carboxypeptidase (EC 3.4.16.2) (Angiotensinase C) (Lysosomal carboxypeptidase C) (Proline carboxypeptidase) (Prolylcarboxypeptidase) (PRCP)	PRCP	2	2	4.4	55.799	1.1225	7.6724	9	0.75775	36.089	9	1083	146118
O95478	Ribosome biogenesis protein NSA2 homolog (Hairy cell leukemia protein 1) (TGF-beta-inducible nuclear protein 1)	NSA2	2	3	12.3	30.065	0.78152	23.576	7	0.75824	30.859	7	442	22798
Q9UQ35	Serine/arginine repetitive matrix protein 2 (300 kDa nuclear matrix antigen) (Serine/arginine-rich splicing factor-related nuclear matrix protein of 300 kDa) (SR-related nuclear matrix protein of 300 kDa) (Ser/Arg-related nuclear matrix protein of 300 kDa) (Splicing coactivator subunit SRm300) (Tax-responsive enhancer element-binding protein 803) (TaxREB803)	SRRM2	6	21	11.4	299.61	0.96903	21.357	39	0.75838	29.753	39	3050	1133
Q53EP0	Fibronectin type III domain-containing protein 3B (Factor for adipocyte differentiation 104) (HCV NS5A-binding protein 37)	FNDC3B	1	6	9.3	132.89	0.8841	7.2571	2	0.75872	5.5785	2	1903	14464
C9J0Q4	E3 ubiquitin-protein ligase RAD18 (Fragment)	RAD18	4	2	25.3	10.462	1.4687	36.725	2	0.75876	42.435	2	2824	90462
Q13573	SNW domain-containing protein 1 (Nuclear protein SkiP) (Nuclear receptor coactivator NCoA-62) (Ski-interacting protein)	SNW1	4	5	16.4	61.494	0.67071	22.241	4	0.75877	34.114	4	1670	15305
Q99878	Histone H2A type 1-J (Histone H2A/e)	H2AC14	17	7	36.7	13.936	0.66815	53.704	88	0.75884	26.352	88	641	8857
P55265	Double-stranded RNA-specific adenosine deaminase (DRADA) (EC 3.5.4.37) (136 kDa double-stranded RNA-binding protein) (p136) (Interferon-inducible protein 4) (IFI-4) (K88DSRBP)	ADAR	6	9	11.5	136.06	0.70528	33.661	7	0.75899	24.622	7	1285	11188
Q15020	Squamous cell carcinoma antigen recognized by T-cells 3 (SART-3) (Tat-interacting protein of 110 kDa) (Tip110) (p110 nuclear RNA-binding protein)	SART3	6	6	10.7	109.93	1.0476	22.544	9	0.75928	16.27	9	1764	14805
H7BYN3	Transcription factor A, mitochondrial (Fragment)	TFAM	2	3	16	25.567	1.0778	12.615	2	0.75957	10.561	2	1494	56600
Q12765	Secernin-1	SCRN1	4	2	7	46.382	0.69	1.6841	3	0.75973	8.9061	3	1588	175920
F5H6J5	Zinc finger CCHC domain-containing protein 8 (Fragment)	ZCCHC8	3	2	14.1	20.879	0.6712	12.909	5	0.75978	28.154	5	1987	84525
P20020	Plasma membrane calcium-transporting ATPase 1 (EC 7.2.2.10) (Plasma membrane calcium ATPase isoform 1) (PMCA1) (Plasma membrane calcium pump isoform 1)	ATP2B1	9	6	8.3	134.68	1.0929	39.68	9	0.75979	26.485	9	797	41765
Q7Z3B4	Nucleoporin p54 (54 kDa nucleoporin)	NUP54	1	5	13.4	55.435	0.92225	25.591	4	0.75996	67.173	4	2056	111148
Q8N1G4	Leucine-rich repeat-containing protein 47	LRRC47	1	9	22.3	63.472	0.81431	27.805	30	0.76034	22.216	30	2156	415
P15531	Nucleoside diphosphate kinase A (NDK A) (NDP kinase A) (EC 2.7.4.6) (Granzyme A-activated DNase) (GAAD) (Metastasis inhibition factor nm23) (NM23-H1) (Tumor metastatic process-associated protein)	NME1	1	8	53.3	17.149	1.1027	9.7818	6	0.76063	10.655	6	735	37514
H0YNM1	GTP cyclohydrolase 1 feedback regulatory protein (GTP cyclohydrolase I feedback regulatory protein)	GCHFR	2	1	56.8	4.8986	1.0236	12.766	2	0.76072	0.59082	2	929	140007
A0A0C4DFV9	Protein SET	SET	4	7	29.3	31.124	0.92943	31.908	19	0.7612	22.992	19	1509	43859
P43487	Ran-specific GTPase-activating protein (Ran-binding protein 1) (RanBP1)	RANBP1	7	6	48.3	23.31	0.87336	18.233	26	0.76142	17.02	26	1091	38067
P50213	Isocitrate dehydrogenase [NAD] subunit alpha, mitochondrial (EC 1.1.1.41) (Isocitric dehydrogenase subunit alpha) (NAD(+)-specific ICDH subunit alpha)	IDH3A	8	7	23.2	39.591	1.1081	30.065	7	0.76164	20.9	7	1179	17917
P49411	Elongation factor Tu, mitochondrial (EF-Tu) (P43)	TUFM	2	23	59.3	49.541	0.83	27.836	130	0.76165	30.539	130	1154	5755
Q9H2H8	Peptidyl-prolyl cis-trans isomerase-like 3 (PPIase) (EC 5.2.1.8) (Cyclophilin J) (CyPJ) (Cyclophilin-like protein PPIL3) (Rotamase PPIL3)	PPIL3	4	4	41.6	18.154	0.82936	30.14	12	0.76248	26.908	12	2692	33294
Q00796	Sorbitol dehydrogenase (SDH) (EC 1.1.1.-) ((R,R)-butanediol dehydrogenase) (EC 1.1.1.4) (L-iditol 2-dehydrogenase) (EC 1.1.1.14) (Polyol dehydrogenase) (Ribitol dehydrogenase) (RDH) (EC 1.1.1.56) (Xylitol dehydrogenase) (XDH) (EC 1.1.1.9)	SORD	3	12	38.9	38.324	0.80527	63.919	29	0.76314	47.73	29	1505	309
A0A087WZ13	Ribonucleoprotein PTB-binding 1	RAVER1	5	9	24	77.843	0.89432	19.59	10	0.76332	30.555	10	3205	14925
Q0VDF9	Heat shock 70 kDa protein 14 (HSP70-like protein 1) (Heat shock protein HSP60)	HSPA14	1	3	9.2	54.794	1.1594	32.524	3	0.76362	57.144	3	1584	53375
K7EN05	Transcription elongation factor 1 homolog	ELOF1	6	1	23.7	8.6531	0.92505	14.662	3	0.76374	11.431	3	1305	144625
P14866	Heterogeneous nuclear ribonucleoprotein L (hnRNP L)	HNRNPL	6	20	49.4	64.132	0.95179	26.987	46	0.76418	29.65	46	724	11725
Q12972	Nuclear inhibitor of protein phosphatase 1 (NIPP-1) (Protein phosphatase 1 regulatory inhibitor subunit 8) [Includes: Activator of RNA decay (EC 3.1.4.-) (ARD-1)]	PPP1R8	2	3	20.2	38.478	0.60081	2.3421	3	0.76469	12.361	3	1605	353
Q9NS69	Mitochondrial import receptor subunit TOM22 homolog (hTom22) (1C9-2) (Translocase of outer membrane 22 kDa subunit homolog)	TOMM22	1	4	40.8	15.521	1.0474	18.867	22	0.76483	17.222	22	2822	743
Q8WXX5	DnaJ homolog subfamily C member 9 (HDJC9) (DnaJ protein SB73)	DNAJC9	1	3	16.5	29.909	0.82381	11.019	10	0.76484	10.413	10	2288	47142
Q9HCU5	Prolactin regulatory element-binding protein (Mammalian guanine nucleotide exchange factor mSec12)	PREB	5	5	19.9	45.468	0.79506	16.991	5	0.76499	26.615	5	2766	9633
Q96DG6	Carboxymethylenebutenolidase homolog (EC 3.1.-.-)	CMBL	1	1	5.7	28.048	0.99624	12.68	2	0.76548	2.5074	2	2396	16841
A0A0J9YXF2	Paraoxonase 2, isoform CRA_a (Serum paraoxonase/arylesterase 2)	PON2	4	2	7.5	41.527	0.85634	17.38	5	0.76554	12.917	5	3213	18304
P09012	U1 small nuclear ribonucleoprotein A (U1 snRNP A) (U1-A) (U1A)	SNRPA	7	7	30.9	31.279	0.76947	23.482	15	0.76573	23.653	15	619	26046
Q9UJZ1	Stomatin-like protein 2, mitochondrial (SLP-2) (EPB72-like protein 2) (Paraprotein target 7) (Paratarg-7)	STOML2	3	6	27.2	38.534	0.83592	28.187	35	0.76578	28.285	35	2994	6571
Q9UNI6	Dual specificity protein phosphatase 12 (EC 3.1.3.16) (EC 3.1.3.48) (Dual specificity tyrosine phosphatase YVH1)	DUSP12	1	1	3.5	37.687	0.59288	10.793	4	0.7658	25.574	4	3036	92272
Q6PK04	Coiled-coil domain-containing protein 137	CCDC137	2	1	6.2	33.231	0.9601	4.9999	2	0.76619	4.584	2	2005	141920
F8WAE5	Eukaryotic translation initiation factor 2A (eIF-2A)	EIF2A	7	7	16.2	64.449	0.85173	20.095	11	0.76643	25.02	11	2638	18381
Q9NRP0	Oligosaccharyltransferase complex subunit OSTC (Hydrophobic protein HSF-28)	OSTC	2	2	12.8	16.829	0.76942	13.255	8	0.76687	10.565	8	2816	125992
F8W9S7	GTPase-activating protein and VPS9 domain-containing protein 1	GAPVD1	8	3	4.7	157.46	0.83224	25.497	2	0.76729	15.231	2	1755	24912
I3L328	Cell division cycle protein 27 homolog (Fragment)	CDC27	3	1	13.3	12.33	0.7387	13.316	2	0.76733	30.624	2	939	98123
P06132	Uroporphyrinogen decarboxylase (UPD) (URO-D) (EC 4.1.1.37)	UROD	5	6	25.6	40.786	0.73262	23.109	11	0.768	25.327	11	564	2392
B4DLR8	NAD(P)H dehydrogenase [quinone] 1 (cDNA FLJ50573, highly similar to Homo sapiens NAD(P)H dehydrogenase, quinone 1 (NQO1), transcript variant 3, mRNA)	NQO1	4	9	38.1	22.793	1.1041	33.892	61	0.76837	26.329	61	736	36827
Q68EM7	Rho GTPase-activating protein 17 (Rho-type GTPase-activating protein 17) (RhoGAP interacting with CIP4 homologs protein 1) (RICH-1)	ARHGAP17	7	5	13.5	95.436	0.82365	26.755	9	0.76842	12.527	9	1967	1706
O15427	Monocarboxylate transporter 4 (MCT 4) (Solute carrier family 16 member 3)	SLC16A3	11	5	12.5	49.469	1.2054	30.202	4	0.76851	35.304	4	214	6484
Q9Y5B9	FACT complex subunit SPT16 (Chromatin-specific transcription elongation factor 140 kDa subunit) (FACT 140 kDa subunit) (FACTp140) (Facilitates chromatin transcription complex subunit SPT16) (hSPT16)	SUPT16H	4	16	19	119.91	0.92727	35.921	41	0.76859	34.038	41	3156	1855
Q96RS6	NudC domain-containing protein 1 (Chronic myelogenous leukemia tumor antigen 66) (Tumor antigen CML66)	NUDCD1	2	2	5.5	66.755	0.90139	17.79	3	0.76898	24.713	3	2486	139976
A0A087WZF1	Lipoma-preferred partner	LPP	12	6	18.6	63.382	0.84599	16.315	3	0.7691	10.138	3	2352	49267
O43143	Pre-mRNA-splicing factor ATP-dependent RNA helicase DHX15 (EC 3.6.4.13) (ATP-dependent RNA helicase #46) (DEAH box protein 15)	DHX15	1	15	21.6	90.932	0.80499	36.991	31	0.77006	57.382	31	221	21690
Q9NUB1	Acetyl-coenzyme A synthetase 2-like, mitochondrial (EC 6.2.1.1) (Acetate--CoA ligase 2) (Acetyl-CoA synthetase 2) (AceCS2) (Acyl-CoA synthetase short-chain family member 1) (Propionate--CoA ligase) (EC 6.2.1.17)	ACSS1	2	9	17.1	74.856	0.97622	30.623	9	0.77042	22.702	9	2836	37582
Q9NVV4	Poly(A) RNA polymerase, mitochondrial (PAP) (EC 2.7.7.19) (PAP-associated domain-containing protein 1) (Polynucleotide adenylyltransferase) (Terminal uridylyltransferase 1) (TUTase 1) (mtPAP)	MTPAP	1	3	9.1	66.171	0.93629	13.975	3	0.77072	13.249	3	2862	49811
Q5QPE4	Sorting nexin-5 (Fragment)	SNX5	5	3	13.5	26.596	0.74867	36.635	13	0.77078	24.502	13	3169	3250
O95777	U6 snRNA-associated Sm-like protein LSm8	LSM8	4	2	35.4	10.403	0.84054	15.599	5	0.7708	16.851	5	458	64911
O60343	TBC1 domain family member 4 (Akt substrate of 160 kDa) (AS160)	TBC1D4	2	5	6.8	146.56	0.85649	48.265	4	0.77086	21.578	4	284	22429
Q8WYA6	Beta-catenin-like protein 1 (Nuclear-associated protein) (NAP) (Testis development protein NYD-SP19)	CTNNBL1	3	4	9.8	65.173	0.70552	31.542	10	0.77117	29.949	10	2290	61555
G3V3M6	DNA-(apurinic or apyrimidinic site) endonuclease (EC 3.1.-.-) (Fragment)	APEX1	10	11	49	29.19	0.86545	48.868	14	0.77145	35.484	14	896	28324
F8W031	DUF3456 domain-containing protein (Fragment)	0	6	6	27.4	29.224	0.73312	32.048	20	0.77214	20.27	20	3251	16078
P12270	Nucleoprotein TPR (Megator) (NPC-associated intranuclear protein) (Translocated promoter region protein)	TPR	2	29	18.7	267.29	0.81037	21.404	35	0.7722	31.31	35	687	890
Q9H3N1	Thioredoxin-related transmembrane protein 1 (Thioredoxin domain-containing protein 1) (Transmembrane Trx-related protein)	TMX1	2	2	8.9	31.791	0.71405	19.643	3	0.77257	15.797	3	2705	56332
P17858	ATP-dependent 6-phosphofructokinase, liver type (ATP-PFK) (PFK-L) (EC 2.7.1.11) (6-phosphofructokinase type B) (Phosphofructo-1-kinase isozyme B) (PFK-B) (Phosphohexokinase)	PFKL	2	10	17.9	85.018	0.83598	32.684	34	0.77271	27.179	34	769	10883
Q8TED0	U3 small nucleolar RNA-associated protein 15 homolog	UTP15	3	4	12.4	58.414	0.83873	19.7	6	0.77327	12.724	6	2255	9560
P00558	Phosphoglycerate kinase 1 (EC 2.7.2.3) (Cell migration-inducing gene 10 protein) (Primer recognition protein 2) (PRP 2)	PGK1	2	28	74.3	44.614	0.74803	33.019	197	0.77344	24.948	197	493	3545
P10620	Microsomal glutathione S-transferase 1 (Microsomal GST-1) (EC 2.5.1.18) (Microsomal GST-I)	MGST1	4	4	22.6	17.598	1.3316	14.696	9	0.77348	19.579	9	655	102022
P14550	Aldo-keto reductase family 1 member A1 (EC 1.1.1.2) (EC 1.1.1.372) (EC 1.1.1.54) (Alcohol dehydrogenase [NADP(+)]) (Aldehyde reductase) (Glucuronate reductase) (EC 1.1.1.19) (Glucuronolactone reductase) (EC 1.1.1.20)	AKR1A1	4	12	48.6	36.573	0.84785	13.316	47	0.77353	24.018	47	716	2545
A0A1B0GTY1	Alpha-ketoglutarate-dependent dioxygenase FTO (EC 1.14.11.53) (Fat mass and obesity-associated protein) (U6 small nuclear RNA (2'-O-methyladenosine-N(6)-)-demethylase FTO) (U6 small nuclear RNA N(6)-methyladenosine-demethylase FTO) (mRNA (2'-O-methyladenosine-N(6)-)-demethylase FTO) (mRNA N(6)-methyladenosine demethylase FTO) (tRNA N1-methyl adenine demethylase FTO)	FTO	9	4	9.5	48.605	0.75179	34.356	8	0.77372	19.587	8	2658	91531
Q7Z2W9	39S ribosomal protein L21, mitochondrial (L21mt) (MRP-L21) (Mitochondrial large ribosomal subunit protein bL21m)	MRPL21	2	2	15.1	22.814	0.99762	13.099	7	0.77508	7.529	7	2055	101528
C9JZR2	Catenin delta-1	CTNND1	6	11	19.8	104.85	0.88632	10.306	9	0.77579	16.536	9	297	73432
P08621	U1 small nuclear ribonucleoprotein 70 kDa (U1 snRNP 70 kDa) (U1-70K) (snRNP70)	SNRNP70	2	4	18.5	51.556	0.85392	10.419	11	0.77618	24.102	11	611	36985
P53004	Biliverdin reductase A (BVR A) (EC 1.3.1.24) (Biliverdin-IX alpha-reductase)	BLVRA	1	7	26	33.428	0.94988	47.782	12	0.77621	14.668	13	1242	37382
Q93077	Histone H2A type 1-C (H2A-clustered histone 6) (Histone H2A/l)	H2AC6	3	7	36.2	14.105	0.5179	12.736	8	0.77651	6.4781	8	543	8857
Q01658	Protein Dr1 (Down-regulator of transcription 1) (Negative cofactor 2-beta) (NC2-beta) (TATA-binding protein-associated phosphoprotein)	DR1	1	1	7.4	19.443	0.88173	8.0324	5	0.77661	11.483	5	1515	112818
P00492	Hypoxanthine-guanine phosphoribosyltransferase (HGPRT) (HGPRTase) (EC 2.4.2.8)	HPRT1	1	3	15.1	24.579	0.86967	17.808	7	0.77685	11.396	7	491	169069
P31942	Heterogeneous nuclear ribonucleoprotein H3 (hnRNP H3) (Heterogeneous nuclear ribonucleoprotein 2H9) (hnRNP 2H9)	HNRNPH3	1	4	18.5	36.926	0.90242	22.402	22	0.77718	25.649	22	962	22519
Q9H3H3	UPF0696 protein C11orf68 (Basophilic leukemia-expressed protein Bles03) (Protein p5326)	C11orf68	1	1	4.5	31.43	0.79526	7.9874	5	0.77741	12.911	5	2702	193799
P60983	Glia maturation factor beta (GMF-beta)	GMFB	3	2	19	16.713	0.90399	11.108	7	0.77754	19.069	7	1320	153628
Q8NE62	Choline dehydrogenase, mitochondrial (CDH) (CHD) (EC 1.1.99.1)	CHDH	1	3	9.6	65.358	0.66381	42.153	4	0.77755	51.633	4	2215	140700
Q8N1G2	Cap-specific mRNA (nucleoside-2'-O-)-methyltransferase 1 (EC 2.1.1.57) (Cap methyltransferase 1) (Cap1 2'O-ribose methyltransferase 1) (MTr1) (hMTr1) (FtsJ methyltransferase domain-containing protein 2) (Interferon-stimulated gene 95 kDa protein) (ISG95)	CMTR1	4	4	5.4	95.32	0.83589	27.304	3	0.77759	50.939	3	2155	57294
E7EUY3	Propionyl-CoA carboxylase beta chain, mitochondrial	PCCB	13	6	17.4	55.708	0.87841	15.337	10	0.77791	27.525	10	551	6938
Q8IVS2	Malonyl-CoA-acyl carrier protein transacylase, mitochondrial (MCT) (EC 2.3.1.39) (Mitochondrial malonyl CoA:ACP acyltransferase) (Mitochondrial malonyltransferase) ([Acyl-carrier-protein] malonyltransferase)	MCAT	1	3	10.5	42.961	0.70221	17.274	7	0.77796	19.679	7	2122	29580
Q13308	Inactive tyrosine-protein kinase 7 (Colon carcinoma kinase 4) (CCK-4) (Protein-tyrosine kinase 7) (Pseudo tyrosine kinase receptor 7) (Tyrosine-protein kinase-like 7)	PTK7	2	4	6.1	118.39	0.6114	41.877	4	0.77842	29.3	4	1637	27985
Q14257	Reticulocalbin-2 (Calcium-binding protein ERC-55) (E6-binding protein) (E6BP)	RCN2	3	5	23.3	36.876	0.90309	16.86	15	0.77897	16.164	15	1717	41229
P30520	Adenylosuccinate synthetase isozyme 2 (AMPSase 2) (AdSS 2) (EC 6.3.4.4) (Adenylosuccinate synthetase, acidic isozyme) (Adenylosuccinate synthetase, liver isozyme) (L-type adenylosuccinate synthetase) (IMP--aspartate ligase 2)	ADSS2	4	5	14.5	50.097	0.97376	26.693	14	0.7794	19.306	14	943	50515
Q13356	RING-type E3 ubiquitin-protein ligase PPIL2 (EC 2.3.2.27) (CYC4) (Cyclophilin-60) (Cyclophilin-like protein Cyp-60) (Cyp60) (hCyP-60) (Probable inactive peptidyl-prolyl cis-trans isomerase-like 2) (PPIase) (Rotamase PPIL2)	PPIL2	1	2	6.9	58.823	0.56049	25.249	3	0.77982	33.956	3	1641	68062
P28482	Mitogen-activated protein kinase 1 (MAP kinase 1) (MAPK 1) (EC 2.7.11.24) (ERT1) (Extracellular signal-regulated kinase 2) (ERK-2) (MAP kinase isoform p42) (p42-MAPK) (Mitogen-activated protein kinase 2) (MAP kinase 2) (MAPK 2)	MAPK1	6	9	33.1	41.389	0.9083	16.397	27	0.78004	26.899	27	911	138
H7C585	Deleted.	0	4	2	22.2	11.901	0.80269	9.1781	2	0.78014	3.6511	2	1852	115344
P27694	Replication protein A 70 kDa DNA-binding subunit (RP-A p70) (Replication factor A protein 1) (RF-A protein 1) (Single-stranded DNA-binding protein) [Cleaved into: Replication protein A 70 kDa DNA-binding subunit, N-terminally processed]	RPA1	4	8	24.8	68.137	0.92278	14.387	6	0.78028	17.821	6	895	1242
B1AHB1	DNA helicase (EC 3.6.4.12)	MCM5	4	6	12.2	77.592	0.95866	53.591	13	0.7803	30.22	13	980	28118
P51610	Host cell factor 1 (HCF) (HCF-1) (C1 factor) (CFF) (VCAF) (VP16 accessory protein) [Cleaved into: HCF N-terminal chain 1; HCF N-terminal chain 2; HCF N-terminal chain 3; HCF N-terminal chain 4; HCF N-terminal chain 5; HCF N-terminal chain 6; HCF C-terminal chain 1; HCF C-terminal chain 2; HCF C-terminal chain 3; HCF C-terminal chain 4; HCF C-terminal chain 5; HCF C-terminal chain 6]	HCFC1	3	14	11.3	208.73	0.69067	43.147	24	0.78185	61.065	24	1209	20405
Q9C005	Protein dpy-30 homolog (Dpy-30-like protein) (Dpy-30L)	DPY30	1	1	29.3	11.25	0.84102	10.23	2	0.78211	1.1	2	2656	139668
P55084	Trifunctional enzyme subunit beta, mitochondrial (TP-beta) [Includes: 3-ketoacyl-CoA thiolase (EC 2.3.1.155) (EC 2.3.1.16) (Acetyl-CoA acyltransferase) (Beta-ketothiolase)]	HADHB	6	27	54	51.294	0.97175	30.398	139	0.78253	27.938	138	1280	1973
P27816	Microtubule-associated protein 4 (MAP-4)	MAP4	9	36	40.5	121	0.65767	37.616	46	0.78254	21.013	45	899	5226
P08579	U2 small nuclear ribonucleoprotein B'' (U2 snRNP B'')	SNRPB2	1	4	17.8	25.486	1.0767	23.224	4	0.78273	20.529	4	610	29408
Q9NW13	RNA-binding protein 28 (RNA-binding motif protein 28)	RBM28	3	4	7	85.737	0.7217	11.116	5	0.78327	49.92	5	2864	64251
P29144	Tripeptidyl-peptidase 2 (TPP-2) (EC 3.4.14.10) (Tripeptidyl aminopeptidase) (Tripeptidyl-peptidase II) (TPP-II)	TPP2	2	8	10	138.35	0.4644	57.441	5	0.78328	39.452	5	915	22000
F8W696	Apolipoprotein A-I	APOA1	2	1	5.7	27.908	3.6673	11.43	2	0.78334	18.243	2	509	120164
A0A0G2JMS5	39S ribosomal protein L45, mitochondrial	MRPL45	4	4	19.9	29.408	0.64382	54.024	9	0.78371	20.664	9	2564	61196
Q96AE4	Far upstream element-binding protein 1 (FBP) (FUSE-binding protein 1) (DNA helicase V) (hDH V)	FUBP1	2	13	32.1	67.56	0.94489	23.067	31	0.78466	33.87	31	2374	72929
C9J719	3-beta-hydroxysteroid-Delta(8),Delta(7)-isomerase (Fragment)	EBP	3	2	17.9	16.608	0.79895	69.047	4	0.78476	38.559	4	1781	3586
E9PPH5	Acidic leucine-rich nuclear phosphoprotein 32 family member E (Fragment)	ANP32E	2	2	12.3	13.128	1.171	22.274	6	0.78476	17.875	6	2592	34994
E7EQ29	Acid beta-galactosidase (EC 3.2.1.23) (Beta-galactosidase)	GLB1	3	5	14.5	60.482	1.0144	33.114	11	0.78489	23.838	11	747	26972
D6RIZ4	Major facilitator superfamily domain-containing protein 10	MFSD10	4	1	3.7	38.247	1.0373	7.4422	2	0.78519	17.83	2	1743	28649
P10253	Lysosomal alpha-glucosidase (EC 3.2.1.20) (Acid maltase) (Aglucosidase alfa) [Cleaved into: 76 kDa lysosomal alpha-glucosidase; 70 kDa lysosomal alpha-glucosidase]	GAA	2	6	8.8	105.32	0.43542	36.281	11	0.7856	22.836	11	648	9532
O15460	Prolyl 4-hydroxylase subunit alpha-2 (4-PH alpha-2) (EC 1.14.11.2) (Procollagen-proline,2-oxoglutarate-4-dioxygenase subunit alpha-2)	P4HA2	9	4	11	60.901	0.67985	9.4589	2	0.78697	26.868	2	217	72387
Q06323	Proteasome activator complex subunit 1 (11S regulator complex subunit alpha) (REG-alpha) (Activator of multicatalytic protease subunit 1) (Interferon gamma up-regulated I-5111 protein) (IGUP I-5111) (Proteasome activator 28 subunit alpha) (PA28a) (PA28alpha)	PSME1	3	17	51.8	28.723	0.96486	48.022	70	0.787	34.039	70	1556	17994
P62995	Transformer-2 protein homolog beta (TRA-2 beta) (TRA2-beta) (hTRA2-beta) (Splicing factor, arginine/serine-rich 10) (Transformer-2 protein homolog B)	TRA2B	3	4	14.9	33.665	1.1809	15.974	5	0.78705	21.606	5	1421	2396
B1ALA9	Ribose-phosphate pyrophosphokinase 1	PRPS1	9	5	27	31.392	1.1528	34.484	8	0.78735	26.547	8	1316	60337
P46060	Ran GTPase-activating protein 1 (RanGAP1)	RANGAP1	5	14	27.1	63.541	0.964	44.052	28	0.7874	33.567	28	1100	7349
Q86VW0	SEC14 domain and spectrin repeat-containing protein 1 (Huntingtin-interacting protein-like protein) (Protein Solo)	SESTD1	4	2	5.7	79.347	1.1352	1.0198	2	0.78752	11.195	2	2098	132417
Q93009	Ubiquitin carboxyl-terminal hydrolase 7 (EC 3.4.19.12) (Deubiquitinating enzyme 7) (Herpesvirus-associated ubiquitin-specific protease) (Ubiquitin thioesterase 7) (Ubiquitin-specific-processing protease 7)	USP7	9	14	20.2	128.3	0.85374	19.637	30	0.78758	20.771	30	2348	12882
Q86W42	THO complex subunit 6 homolog (Functional spliceosome-associated protein 35) (fSAP35) (WD repeat-containing protein 58)	THOC6	1	2	10.3	37.535	1.18	21.566	2	0.78759	26.006	2	2099	26081
E9PMP7	LIM domain only protein 7 (Fragment)	LMO7	14	6	10.1	119.42	0.8673	20.303	6	0.78788	14.416	6	2278	132175
Q9UI30	Multifunctional methyltransferase subunit TRM112-like protein (tRNA methyltransferase 112 homolog)	TRMT112	3	4	42.4	14.199	0.9508	19.514	7	0.78794	7.4528	6	2983	68188
O43172	U4/U6 small nuclear ribonucleoprotein Prp4 (PRP4 homolog) (hPrp4) (U4/U6 snRNP 60 kDa protein) (WD splicing factor Prp4)	PRPF4	1	4	11.5	58.449	0.89783	29.795	3	0.78816	38.247	3	224	13710
P11047	Laminin subunit gamma-1 (Laminin B2 chain) (Laminin-1 subunit gamma) (Laminin-10 subunit gamma) (Laminin-11 subunit gamma) (Laminin-2 subunit gamma) (Laminin-3 subunit gamma) (Laminin-4 subunit gamma) (Laminin-6 subunit gamma) (Laminin-7 subunit gamma) (Laminin-8 subunit gamma) (Laminin-9 subunit gamma) (S-laminin subunit gamma) (S-LAM gamma)	LAMC1	1	10	10.7	177.6	0.68515	36.107	7	0.78817	54.927	7	663	22009
A0A0A0MT83	Butyryl-CoA dehydrogenase (EC 1.3.8.1) (EC 1.3.8.4) (Isovaleryl-CoA dehydrogenase, mitochondrial)	IVD	7	7	21.1	46.65	0.97156	35.507	16	0.78866	20.61	16	880	57797
A8MZF9	Developmentally-regulated GTP-binding protein 2	DRG2	8	3	12.2	38.129	0.91685	14.422	9	0.78886	20.832	9	1277	63857
J3KNF4	Copper chaperone for superoxide dismutase	CCS	4	3	19.2	27.086	0.68745	27.172	2	0.78913	2.6329	2	157	57807
E9PFK5	Nucleolar protein 14	NOP14	2	3	4.8	88.865	0.6066	42.237	4	0.7898	12.191	4	1452	30652
O00567	Nucleolar protein 56 (Nucleolar protein 5A)	NOP56	4	18	37.4	66.049	0.87611	23.53	70	0.78991	18.84	70	141	41501
P61960	Ubiquitin-fold modifier 1	UFM1	2	2	58.8	9.1175	0.80874	6.5586	12	0.79009	8.3022	12	1358	52809
P26640	Valine--tRNA ligase (EC 6.1.1.9) (Protein G7a) (Valyl-tRNA synthetase) (ValRS)	VARS1	7	18	20.5	140.47	0.71184	27.729	41	0.79043	31.001	41	884	2584
Q12904	Aminoacyl tRNA synthase complex-interacting multifunctional protein 1 (Multisynthase complex auxiliary component p43) [Cleaved into: Endothelial monocyte-activating polypeptide 2 (EMAP-2) (Endothelial monocyte-activating polypeptide II) (EMAP-II) (Small inducible cytokine subfamily E member 1)]	AIMP1	2	10	53.5	34.352	0.91006	43.025	25	0.79051	23.522	25	1598	10994
P17252	Protein kinase C alpha type (PKC-A) (PKC-alpha) (EC 2.7.11.13)	PRKCA	5	6	14.7	76.749	0.80041	9.2497	6	0.79087	17.785	6	763	5554
O95163	Elongator complex protein 1 (ELP1) (IkappaB kinase complex-associated protein) (IKK complex-associated protein) (p150)	ELP1	3	7	7.7	150.25	0.90173	15.972	5	0.79145	26.991	5	418	6929
Q9NVP1	ATP-dependent RNA helicase DDX18 (EC 3.6.4.13) (DEAD box protein 18) (Myc-regulated DEAD box protein) (MrDb)	DDX18	2	9	21.8	75.406	1.0554	19.224	12	0.79207	13.215	12	2857	48598
A0A087X2B5	Basigin (Fragment)	BSG	7	8	38	23.896	0.82689	17.374	32	0.79219	18.539	32	1007	55089
E9PFN5	Glutathione S-transferase kappa (EC 2.5.1.18)	GSTK1	3	4	30	21.707	0.7244	13.024	8	0.79228	15.871	8	3080	8918
Q9BUQ8	Probable ATP-dependent RNA helicase DDX23 (EC 3.6.4.13) (100 kDa U5 snRNP-specific protein) (DEAD box protein 23) (PRP28 homolog) (U5-100kD)	DDX23	3	4	6.5	95.581	0.83802	29.238	4	0.79244	28.684	4	2604	19576
U3KPU7	Glucose-6-phosphate exchanger SLC37A4	SLC37A4	3	1	3	46.443	1.6448	17.936	5	0.79248	42.661	5	267	62275
P00390	Glutathione reductase, mitochondrial (GR) (GRase) (EC 1.8.1.7)	GSR	3	12	37.4	56.256	0.95615	21.006	66	0.79263	24.298	66	484	4549
P22626	Heterogeneous nuclear ribonucleoproteins A2/B1 (hnRNP A2/B1)	HNRNPA2B1	2	17	50.7	37.429	1.0412	43.349	86	0.79271	45.571	86	837	39935
Q9NX14	NADH dehydrogenase [ubiquinone] 1 beta subcomplex subunit 11, mitochondrial (Complex I-ESSS) (CI-ESSS) (NADH-ubiquinone oxidoreductase ESSS subunit) (Neuronal protein 17.3) (Np17.3) (p17.3)	NDUFB11	1	3	30.7	17.316	1.0264	22.523	2	0.79282	33.1	2	2872	41530
B5MCK8	Inactive glutathione hydrolase 2	GGT2	11	2	4.1	60.851	0.86635	25.128	9	0.79289	18.738	9	90	114240
P61088	Ubiquitin-conjugating enzyme E2 N (EC 2.3.2.23) (Bendless-like ubiquitin-conjugating enzyme) (E2 ubiquitin-conjugating enzyme N) (Ubc13) (UbcH13) (Ubiquitin carrier protein N) (Ubiquitin-protein ligase N)	UBE2N	6	5	31.6	17.138	0.75272	30.391	20	0.79323	13.761	20	1329	82089
Q9UJU6	Drebrin-like protein (Cervical SH3P7) (Cervical mucin-associated protein) (Drebrin-F) (HPK1-interacting protein of 55 kDa) (HIP-55) (SH3 domain-containing protein 7)	DBNL	4	5	17.7	48.207	0.7511	21.47	9	0.79329	16.165	9	2991	16686
Q8IY81	pre-rRNA 2'-O-ribose RNA methyltransferase FTSJ3 (EC 2.1.1.-) (Protein ftsJ homolog 3) (Putative rRNA methyltransferase 3)	FTSJ3	1	10	16.4	96.557	0.82497	13.338	17	0.79335	27.112	17	2139	2182
Q08752	Peptidyl-prolyl cis-trans isomerase D (PPIase D) (EC 5.2.1.8) (40 kDa peptidyl-prolyl cis-trans isomerase) (Cyclophilin-40) (CYP-40) (Cyclophilin-related protein) (Rotamase D)	PPID	1	4	16.5	40.763	0.91007	14.193	5	0.7934	29.627	5	1576	79993
P53007	Tricarboxylate transport protein, mitochondrial (Citrate transport protein) (CTP) (Solute carrier family 25 member 1) (Tricarboxylate carrier protein)	SLC25A1	2	5	17.4	34.012	1.1691	27.41	28	0.79347	14.621	28	1243	56225
P00441	Superoxide dismutase [Cu-Zn] (EC 1.15.1.1) (Superoxide dismutase 1) (hSod1)	SOD1	2	7	64.9	15.936	1.0309	40.665	18	0.79393	24.045	18	488	4411
P12931	Proto-oncogene tyrosine-protein kinase Src (EC 2.7.10.2) (Proto-oncogene c-Src) (pp60c-src) (p60-Src)	SRC	2	5	14.2	59.834	0.76697	28.939	9	0.79402	70.121	9	691	2165
Q96HS1	Serine/threonine-protein phosphatase PGAM5, mitochondrial (EC 3.1.3.16) (Bcl-XL-binding protein v68) (Phosphoglycerate mutase family member 5)	PGAM5	2	4	11.8	32.004	0.88384	34.174	2	0.79407	34.594	2	2434	100824
Q5JVC1	Citramalyl-CoA lyase, mitochondrial (Fragment)	CLYBL	3	3	28.6	16.28	0.66896	13.274	5	0.79471	14.346	5	2149	187590
P19338	Nucleolin (Protein C23)	NCL	6	27	34.4	76.613	0.85795	42.079	191	0.79497	22.185	191	788	13393
A0A087WZX2	Complex I-B17 (NADH dehydrogenase [ubiquinone] 1 beta subcomplex subunit 6) (NADH-ubiquinone oxidoreductase B17 subunit)	NDUFB6	2	2	25.8	11.716	0.83999	10.731	5	0.79506	8.2128	5	415	84743
B5MCN0	Atlastin-2	ATL2	3	3	13.1	47.4	0.80213	12.573	10	0.79515	15.315	10	2226	150605
P11586	C-1-tetrahydrofolate synthase, cytoplasmic (C1-THF synthase) [Cleaved into: C-1-tetrahydrofolate synthase, cytoplasmic, N-terminally processed] [Includes: Methylenetetrahydrofolate dehydrogenase (EC 1.5.1.5); Methenyltetrahydrofolate cyclohydrolase (EC 3.5.4.9); Formyltetrahydrofolate synthetase (EC 6.3.4.3)]	MTHFD1	2	25	30.4	101.56	0.83422	34.416	68	0.79534	21.292	68	678	2373
P47985	Cytochrome b-c1 complex subunit Rieske, mitochondrial (EC 7.1.1.8) (Complex III subunit 5) (Cytochrome b-c1 complex subunit 5) (Rieske iron-sulfur protein) (RISP) (Rieske protein UQCRFS1) (Ubiquinol-cytochrome c reductase iron-sulfur subunit) [Cleaved into: Cytochrome b-c1 complex subunit 9 (Su9) (Subunit 9) (8 kDa subunit 9) (Complex III subunit IX) (Cytochrome b-c1 complex subunit 11) (UQCRFS1 …	UQCRFS1	2	6	26.3	29.668	1.0449	44.015	18	0.79535	29.326	18	1128	45360
Q5JP53	Tubulin beta chain	TUBB	6	21	48.8	47.766	0.84817	15.964	90	0.79546	20.585	90	586	11153
Q8NBX0	Saccharopine dehydrogenase-like oxidoreductase (EC 1.-.-.-)	SCCPDH	1	5	14.7	47.151	0.76359	24.835	24	0.79549	20.597	24	2195	8286
P52272	Heterogeneous nuclear ribonucleoprotein M (hnRNP M)	HNRNPM	10	31	50.5	77.515	0.83964	31.336	167	0.7965	25.559	167	1223	1435
P12956	X-ray repair cross-complementing protein 6 (EC 3.6.4.-) (EC 4.2.99.-) (5'-deoxyribose-5-phosphate lyase Ku70) (5'-dRP lyase Ku70) (70 kDa subunit of Ku antigen) (ATP-dependent DNA helicase 2 subunit 1) (ATP-dependent DNA helicase II 70 kDa subunit) (CTC box-binding factor 75 kDa subunit) (CTC75) (CTCBF) (DNA repair protein XRCC6) (Lupus Ku autoantigen protein p70) (Ku70) (Thyroid-lupus autoantige…	XRCC6	2	24	38.8	69.842	0.95183	23.657	110	0.79664	25.634	110	693	32735
P11177	Pyruvate dehydrogenase E1 component subunit beta, mitochondrial (PDHE1-B) (EC 1.2.4.1)	PDHB	3	10	40.4	39.233	0.82594	19.42	47	0.79695	23.343	46	669	31129
Q9NQG5	Regulation of nuclear pre-mRNA domain-containing protein 1B (Cell cycle-related and expression-elevated protein in tumor)	RPRD1B	6	7	22.4	36.899	0.85461	19.32	18	0.79698	18.105	18	2797	14714
P63151	Serine/threonine-protein phosphatase 2A 55 kDa regulatory subunit B alpha isoform (PP2A subunit B isoform B55-alpha) (PP2A subunit B isoform PR55-alpha) (PP2A subunit B isoform R2-alpha) (PP2A subunit B isoform alpha)	PPP2R2A	3	2	5.1	51.691	0.88468	16.037	2	0.79752	0.68667	2	1426	113627
Q16186	Proteasomal ubiquitin receptor ADRM1 (110 kDa cell membrane glycoprotein) (Gp110) (Adhesion-regulating molecule 1) (ARM-1) (Proteasome regulatory particle non-ATPase 13) (hRpn13) (Rpn13 homolog)	ADRM1	3	3	12.3	42.153	0.87665	18.835	13	0.79754	27.269	13	1838	174623
P23378	Glycine dehydrogenase (decarboxylating), mitochondrial (EC 1.4.4.2) (Glycine cleavage system P protein) (Glycine decarboxylase) (Glycine dehydrogenase (aminomethyl-transferring))	GLDC	9	11	17.4	112.73	1.2603	33.182	8	0.79766	21.206	8	848	33170
P60174	Triosephosphate isomerase (TIM) (EC 5.3.1.1) (Methylglyoxal synthase) (EC 4.2.3.3) (Triose-phosphate isomerase)	TPI1	4	18	75.5	30.791	0.82421	21.468	197	0.79778	24.036	197	1307	29960
E9PES6	High mobility group protein B3 (Fragment)	HMGB3	4	4	15	17.522	0.9262	13.184	4	0.79795	13.039	4	208	104780
O95336	6-phosphogluconolactonase (6PGL) (EC 3.1.1.31)	PGLS	4	6	35.3	27.547	0.74427	12.176	15	0.798	16.152	15	431	47760
J3KS22	L-xylulose reductase (Fragment)	DCXR	8	13	65.9	23.803	0.83211	36.608	72	0.79817	19.722	72	2070	25696
E9PQP3	ADP-ribosylation factor GTPase-activating protein 2 (Fragment)	ARFGAP2	14	3	20.1	30.597	0.80447	21.986	5	0.79843	33.109	5	2176	1021
Q5R3I4	Tetratricopeptide repeat protein 38 (TPR repeat protein 38)	TTC38	3	5	12.8	52.787	0.96813	42.477	6	0.79852	11.253	6	1927	38928
Q8N766	ER membrane protein complex subunit 1	EMC1	1	4	5.8	111.76	0.85129	38.781	7	0.79897	45.995	7	2179	58822
Q5VT52	Regulation of nuclear pre-mRNA domain-containing protein 2	RPRD2	1	2	2	156.02	0.85717	6.6892	2	0.7991	31.102	2	1947	50384
A0AVT1	Ubiquitin-like modifier-activating enzyme 6 (Ubiquitin-activating enzyme 6) (EC 6.2.1.45) (Monocyte protein 4) (MOP-4) (Ubiquitin-activating enzyme E1-like protein 2) (E1-L2)	UBA6	2	3	4.9	117.97	0.76155	10.85	4	0.79936	30.493	4	80	70775
Q8WU90	Zinc finger CCCH domain-containing protein 15 (DRG family-regulatory protein 1) (Likely ortholog of mouse immediate early response erythropoietin 4)	ZC3H15	3	4	9.9	48.602	0.93488	16.611	5	0.79947	7.2156	5	2264	38743
A0A0X1KG75	Cordon-bleu protein-like 1 (Fragment)	COBLL1	10	14	20.7	127.83	0.82261	49.476	8	0.7998	23.423	8	3214	9226
Q92522	Histone H1.10 (Histone H1x)	H1-10	1	4	26.3	22.487	0.80168	10.908	9	0.80036	22.981	9	2296	16274
P18669	Phosphoglycerate mutase 1 (EC 5.4.2.11) (EC 5.4.2.4) (BPG-dependent PGAM 1) (Phosphoglycerate mutase isozyme B) (PGAM-B)	PGAM1	3	13	55.9	28.804	0.90357	35.98	84	0.80045	25.793	84	781	14587
Q8IXI1	Mitochondrial Rho GTPase 2 (MIRO-2) (hMiro-2) (EC 3.6.5.-) (Ras homolog gene family member T2)	RHOT2	7	8	21.7	68.117	0.98953	31.014	9	0.80049	15.864	9	2134	5219
A0A087WTA5	Translation initiation factor eIF-2B subunit delta	EIF2B4	6	4	10.4	57.495	0.87177	17.273	3	0.8005	43.97	3	2981	100915
Q8NB78	Lysine-specific histone demethylase 1B (EC 1.14.99.66) (Flavin-containing amine oxidase domain-containing protein 1) (Lysine-specific histone demethylase 2)	KDM1B	2	1	1.5	92.097	0.98223	7.9061	2	0.80089	19.941	2	2184	214879
P35914	Hydroxymethylglutaryl-CoA lyase, mitochondrial (HL) (HMG-CoA lyase) (EC 4.1.3.4) (3-hydroxy-3-methylglutarate-CoA lyase)	HMGCL	1	5	16.9	34.36	1.0707	32.62	9	0.80122	23.564	9	1012	2448
P42025	Beta-centractin (Actin-related protein 1B) (ARP1B)	ACTR1B	1	7	28.2	42.293	0.79453	37.582	11	0.80127	27.583	11	1069	8117
Q15459	Splicing factor 3A subunit 1 (SF3a120) (Spliceosome-associated protein 114) (SAP 114)	SF3A1	4	14	23.1	88.885	0.86165	30.372	34	0.80127	21.519	34	1815	21086
P00167	Cytochrome b5 (Microsomal cytochrome b5 type A) (MCB5)	CYB5A	1	4	38.8	15.33	1.2877	71.282	4	0.80163	23.111	4	478	6602
B4DJV2	Citrate synthase	CS	20	10	22.3	50.431	1.1694	23.297	50	0.80179	19.204	50	344	13740
Q99848	Probable rRNA-processing protein EBP2 (EBNA1-binding protein 2) (Nucleolar protein p40)	EBNA1BP2	2	3	12.1	34.852	0.98896	10.381	3	0.80192	9.4956	3	2539	111715
O75436	Vacuolar protein sorting-associated protein 26A (Vesicle protein sorting 26A) (hVPS26)	VPS26A	2	6	26.3	38.169	0.99046	13.215	10	0.80218	18.537	10	349	46200
E5RGX5	Stathmin	STMN2	2	2	11.3	19.574	0.67996	16.808	2	0.80232	14.77	2	2350	13210
Q92879	CUGBP Elav-like family member 1 (CELF-1) (50 kDa nuclear polyadenylated RNA-binding protein) (Bruno-like protein 2) (CUG triplet repeat RNA-binding protein 1) (CUG-BP1) (CUG-BP- and ETR-3-like factor 1) (Deadenylation factor CUG-BP) (Embryo deadenylation element-binding protein homolog) (EDEN-BP homolog) (RNA-binding protein BRUNOL-2)	CELF1	16	5	13.6	52.063	0.64225	24.077	10	0.80242	40.754	10	2333	1770
E9PDF6	Unconventional myosin-Ib	MYO1B	7	10	11.7	128.48	0.96706	20.783	15	0.80253	21.399	15	262	16339
Q9Y265	RuvB-like 1 (EC 3.6.4.12) (49 kDa TATA box-binding protein-interacting protein) (49 kDa TBP-interacting protein) (54 kDa erythrocyte cytosolic protein) (ECP-54) (INO80 complex subunit H) (Nuclear matrix protein 238) (NMP 238) (Pontin 52) (TIP49a) (TIP60-associated protein 54-alpha) (TAP54-alpha)	RUVBL1	5	13	42.1	50.227	0.89146	29.785	41	0.8026	17.509	41	3063	13506
E9PGT6	COP9 signalosome complex subunit 8	COPS8	3	3	28.9	19.344	0.74227	36.336	6	0.80273	25.068	6	2524	56450
Q96KR1	Zinc finger RNA-binding protein (hZFR) (M-phase phosphoprotein homolog)	ZFR	1	10	20	117.01	1.0142	12.768	5	0.80315	18.883	5	2457	11584
P55795	Heterogeneous nuclear ribonucleoprotein H2 (hnRNP H2) (FTP-3) (Heterogeneous nuclear ribonucleoprotein H') (hnRNP H') [Cleaved into: Heterogeneous nuclear ribonucleoprotein H2, N-terminally processed]	HNRNPH2	1	8	25.4	49.263	0.72846	22.588	6	0.80337	28.941	6	1289	22601
Q8NFH3	Nucleoporin Nup43 (Nup107-160 subcomplex subunit Nup43) (p42)	NUP43	4	4	12.6	42.15	0.9674	34.27	4	0.80338	31.98	4	2221	83642
A0A0C4DGX4	Cullin-1	CUL1	2	2	2.9	87.387	1.7397	69.642	3	0.80374	28.783	3	1676	50387
Q9NXA8	NAD-dependent protein deacylase sirtuin-5, mitochondrial (EC 2.3.1.-) (Regulatory protein SIR2 homolog 5) (SIR2-like protein 5)	SIRT5	1	3	18.4	33.881	0.68938	7.0366	2	0.80391	36.822	2	2880	55944
P10606	Cytochrome c oxidase subunit 5B, mitochondrial (Cytochrome c oxidase polypeptide Vb)	COX5B	1	5	25.6	13.696	0.57757	26.862	22	0.80403	30.178	22	653	42642
Q96AY3	Peptidyl-prolyl cis-trans isomerase FKBP10 (PPIase FKBP10) (EC 5.2.1.8) (65 kDa FK506-binding protein) (65 kDa FKBP) (FKBP-65) (FK506-binding protein 10) (FKBP-10) (Immunophilin FKBP65) (Rotamase)	FKBP10	5	9	20.3	64.244	0.90495	23.849	21	0.80407	21.444	21	2377	21498
P49720	Proteasome subunit beta type-3 (EC 3.4.25.1) (Proteasome chain 13) (Proteasome component C10-II) (Proteasome theta chain)	PSMB3	4	5	33.7	22.949	0.96304	53.699	21	0.80465	21.624	21	1161	55401
Q15717	ELAV-like protein 1 (Hu-antigen R) (HuR)	ELAVL1	10	12	47.2	36.091	0.90232	21.098	52	0.80496	27.742	52	1825	11306
Q13242	Serine/arginine-rich splicing factor 9 (Pre-mRNA-splicing factor SRp30C) (Splicing factor, arginine/serine-rich 9)	SRSF9	3	7	29.9	25.542	1.0434	32.246	18	0.80506	16.954	18	1631	32285
Q08J23	RNA cytosine C(5)-methyltransferase NSUN2 (EC 2.1.1.-) (Myc-induced SUN domain-containing protein) (Misu) (NOL1/NOP2/Sun domain family member 2) (Substrate of AIM1/Aurora kinase B) (mRNA cytosine C(5)-methyltransferase) (EC 2.1.1.-) (tRNA cytosine C(5)-methyltransferase) (EC 2.1.1.-) (EC 2.1.1.203) (tRNA methyltransferase 4 homolog) (hTrm4)	NSUN2	1	6	11.6	86.47	0.71871	12.992	6	0.80514	15.082	6	1579	90552
M0R2A8	Dipeptidyl peptidase 9	DPP9	2	1	2.3	59.069	0.86889	11.54	4	0.80527	5.8205	4	2084	48434
Q9NP97	Dynein light chain roadblock-type 1 (Bithoraxoid-like protein) (BLP) (Dynein light chain 2A, cytoplasmic) (Dynein-associated protein Km23) (Roadblock domain-containing protein 1)	DYNLRB1	7	3	43.8	10.921	0.91969	21.768	10	0.8055	24.863	10	2782	6729
P60468	Protein transport protein Sec61 subunit beta	SEC61B	2	3	37.5	9.9743	0.96198	29.439	16	0.80598	34.102	16	1309	62886
Q8NEJ9	Neuroguidin (Centromere accumulated nuclear protein 1) (CANu1) (EIF4E-binding protein)	NGDN	3	3	12.4	35.894	0.78336	28.803	4	0.80605	15.778	4	2218	56842
A8MV53	HCG2033702, isoform CRA_a (Suppressor of SWI4 1 homolog)	PPAN	6	3	20.7	47.144	0.69038	7.9976	2	0.80619	37.264	2	2792	126885
C9J2G0	BRCA1-A complex subunit BRE (BRCA1/BRCA2-containing complex subunit 45) (BRISC and BRCA1-A complex member 2) (Brain and reproductive organ-expressed protein) (Fragment)	BABAM2	3	1	9.2	17.339	0.8345	15.63	2	0.80643	7.9525	2	2884	97755
Q9NUQ9	CYFIP-related Rac1 interactor B (L1)	CYRIB	11	5	22.2	36.748	1.2092	38.543	6	0.8067	21.23	6	2848	26601
B1AJY7	26S proteasome non-ATPase regulatory subunit 10	PSMD10	4	2	20.2	20.808	0.8053	9.1997	2	0.80672	47.124	2	370	63959
O43290	U4/U6.U5 tri-snRNP-associated protein 1 (SNU66 homolog) (hSnu66) (Squamous cell carcinoma antigen recognized by T-cells 1) (SART-1) (hSART-1) (U4/U6.U5 tri-snRNP-associated 110 kDa protein) (allergen Hom s 1)	SART1	2	5	11	90.254	0.93149	39.827	2	0.80682	31.058	2	231	4412
A6ND22	28S ribosomal protein S16, mitochondrial	MRPS16	2	1	18.2	11.15	0.81942	7.4252	3	0.80702	5.4122	3	3117	61683
O43809	Cleavage and polyadenylation specificity factor subunit 5 (Cleavage and polyadenylation specificity factor 25 kDa subunit) (CPSF 25 kDa subunit) (Cleavage factor Im complex 25 kDa subunit) (CFIm25) (Nucleoside diphosphate-linked moiety X motif 21) (Nudix motif 21) (Nudix hydrolase 21) (Pre-mRNA cleavage factor Im 68 kDa subunit)	NUDT21	3	6	25.1	26.227	1.1502	13.051	12	0.80726	26.35	12	263	13518
Q3ZCQ8	Mitochondrial import inner membrane translocase subunit TIM50	TIMM50	4	4	15.6	39.646	0.86854	27.072	13	0.80736	24.11	13	1892	95020
P15144	Aminopeptidase N (AP-N) (hAPN) (EC 3.4.11.2) (Alanyl aminopeptidase) (Aminopeptidase M) (AP-M) (Microsomal aminopeptidase) (Myeloid plasma membrane glycoprotein CD13) (gp150) (CD antigen CD13)	ANPEP	2	9	16.6	109.54	0.65174	33.666	12	0.8084	24.714	12	730	19315
E9PBP6	Microsomal triglyceride transfer protein large subunit	MTTP	7	19	28.1	102.64	1.4099	38.085	30	0.8085	42.23	30	3239	39184
P48735	Isocitrate dehydrogenase [NADP], mitochondrial (IDH) (EC 1.1.1.42) (ICD-M) (IDP) (NADP(+)-specific ICDH) (Oxalosuccinate decarboxylase)	IDH2	2	16	36.9	50.909	1.047	23.806	39	0.80866	22.43	38	1139	33681
Q13823	Nucleolar GTP-binding protein 2 (Autoantigen NGP-1)	GNL2	1	1	2.5	83.654	1.2795	26.051	3	0.80868	20.822	3	1684	87917
P04179	Superoxide dismutase [Mn], mitochondrial (EC 1.15.1.1)	SOD2	7	9	39.2	24.75	0.85149	38.301	38	0.80877	18.761	39	534	30848
Q8NI27	THO complex subunit 2 (Tho2) (hTREX120)	THOC2	4	3	2.3	182.77	0.90345	51.176	10	0.80928	21.113	10	2228	463
P11172	Uridine 5'-monophosphate synthase (UMP synthase) [Includes: Orotate phosphoribosyltransferase (OPRT) (OPRTase) (EC 2.4.2.10); Orotidine 5'-phosphate decarboxylase (ODC) (EC 4.1.1.23) (OMPdecase)]	UMPS	5	7	25.4	52.221	1.0557	24.702	14	0.80972	23.692	14	668	1831
Q96DI7	U5 small nuclear ribonucleoprotein 40 kDa protein (U5 snRNP 40 kDa protein) (U5-40K) (38 kDa-splicing factor) (Prp8-binding protein) (hPRP8BP) (U5 snRNP-specific 40 kDa protein) (WD repeat-containing protein 57)	SNRNP40	2	5	22.7	39.31	0.95988	24.597	8	0.80983	24.2	8	2397	67326
Q13492	Phosphatidylinositol-binding clathrin assembly protein (Clathrin assembly lymphoid myeloid leukemia protein)	PICALM	15	8	20.2	70.754	1.0352	34.775	10	0.80984	31.677	10	1658	23688
Q9P2J5	Leucine--tRNA ligase, cytoplasmic (EC 6.1.1.4) (Leucyl-tRNA synthetase) (LeuRS)	LARS1	2	14	16.4	134.46	0.80111	28.507	24	0.80988	23.682	24	2934	42515
Q9UQ80	Proliferation-associated protein 2G4 (Cell cycle protein p38-2G4 homolog) (hG4-1) (ErbB3-binding protein 1)	PA2G4	5	15	44.9	43.786	1.0098	27.92	68	0.80991	25.452	68	3051	6996
O75940	Survival of motor neuron-related-splicing factor 30 (30 kDa splicing factor SMNrp) (SMN-related protein) (Survival motor neuron domain-containing protein 1)	SMNDC1	1	3	24.4	26.711	1.154	4.6609	3	0.81018	13.442	3	380	19508
P28370	Probable global transcription activator SNF2L1 (EC 3.6.4.-) (ATP-dependent helicase SMARCA1) (Nucleosome-remodeling factor subunit SNF2L) (SWI/SNF-related matrix-associated actin-dependent regulator of chromatin subfamily A member 1)	SMARCA1	3	6	6.2	122.6	0.74174	20.43	9	0.81061	11.438	9	910	31210
P02649	Apolipoprotein E (Apo-E)	APOE	4	7	28.7	36.154	1.176	23.148	8	0.81071	20.009	8	510	2789
K7ELQ0	39S ribosomal protein L4, mitochondrial	MRPL4	7	3	21.4	24.446	0.71857	15.446	13	0.81072	15.464	13	2645	22756
O95865	N(G),N(G)-dimethylarginine dimethylaminohydrolase 2 (DDAH-2) (Dimethylarginine dimethylaminohydrolase 2) (EC 3.5.3.18) (DDAHII) (Dimethylargininase-2) (Protein G6a) (S-phase protein)	DDAH2	4	3	18.6	29.644	0.87616	13.739	2	0.81075	13.407	2	467	66631
Q8WW12	PEST proteolytic signal-containing nuclear protein (PCNP) (PEST-containing nuclear protein)	PCNP	1	3	21.9	18.925	0.88739	22.582	4	0.81099	8.5668	4	2277	38428
E9PCH5	Calpain inhibitor (Calpastatin)	CAST	18	10	27.3	72.798	0.8253	25.978	17	0.81102	33.851	17	3240	38149
O60832	H/ACA ribonucleoprotein complex subunit DKC1 (EC 5.4.99.-) (CBF5 homolog) (Dyskerin) (Nopp140-associated protein of 57 kDa) (Nucleolar protein NAP57) (Nucleolar protein family A member 4) (snoRNP protein DKC1)	DKC1	6	11	26.1	57.673	0.91154	37.883	18	0.81114	48.325	18	309	4238
O43615	Mitochondrial import inner membrane translocase subunit TIM44	TIMM44	3	5	13.9	51.355	0.89285	26.194	18	0.81115	27.29	18	246	13764
Q5JR04	RNA helicase (EC 3.6.4.13)	MOV10	2	8	13.1	107.21	0.73857	30.789	9	0.81117	37.155	9	2761	9734
Q13838	Spliceosome RNA helicase DDX39B (EC 3.6.4.13) (56 kDa U2AF65-associated protein) (ATP-dependent RNA helicase p47) (DEAD box protein UAP56) (HLA-B-associated transcript 1 protein)	DDX39B	26	14	45.6	48.991	1.0612	30.141	42	0.81128	25.926	42	1686	6314
Q6PKG0	La-related protein 1 (La ribonucleoprotein domain family member 1)	LARP1	9	7	12.7	123.51	0.87886	19.407	7	0.81136	25.166	7	2007	23606
Q96SL4	Glutathione peroxidase 7 (GPx-7) (GSHPx-7) (EC 1.11.1.9) (CL683)	GPX7	1	1	7	20.996	0.85981	17.478	2	0.81152	26.161	2	2491	81685
A0A024QZP7	Cell division cycle 2, G1 to S and G2 to M, isoform CRA_a (Cyclin-dependent kinase 1)	CDK1	35	6	24.2	34.081	0.93323	15.852	12	0.81228	13.798	12	567	13887
F2Z2X4	Exportin-4	XPO4	2	1	1.2	130.15	0.73031	3.6639	2	0.81236	26.455	2	2662	212771
D6R938	Calcium/calmodulin-dependent protein kinase (EC 2.7.11.17)	CAMK2D	7	10	25.5	56.298	1.0174	55.572	12	0.81245	35.484	12	1667	7838
Q9NXH9	tRNA (guanine(26)-N(2))-dimethyltransferase (EC 2.1.1.216) (tRNA 2,2-dimethylguanosine-26 methyltransferase) (tRNA(guanine-26,N(2)-N(2)) methyltransferase) (tRNA(m(2,2)G26)dimethyltransferase)	TRMT1	2	3	9.4	72.233	0.69965	10.557	2	0.81302	7.0889	2	2883	59403
P82909	28S ribosomal protein S36, mitochondrial (MRP-S36) (S36mt) (Alpha-ketoglutarate dehydrogenase component 4)	MRPS36	1	3	45.6	11.466	1.0073	62.016	6	0.81327	45.346	6	1476	163347
Q71UM5	40S ribosomal protein S27-like (Small ribosomal subunit protein eS27-like)	RPS27L	3	3	38.1	9.4771	0.98336	16.712	37	0.81431	22.64	37	2033	34389
O14841	5-oxoprolinase (EC 3.5.2.9) (5-oxo-L-prolinase) (5-OPase) (Pyroglutamase)	OPLAH	2	5	7.7	137.46	0.9436	20.08	3	0.81469	27.678	3	170	67354
Q9Y4W2	Ribosomal biogenesis protein LAS1L (Protein LAS1 homolog)	LAS1L	1	2	3.5	83.064	1.1019	64.422	2	0.81486	3.1772	2	3145	123498
Q9Y4W6	AFG3-like protein 2 (EC 3.4.24.-) (Paraplegin-like protein)	AFG3L2	2	7	10.8	88.583	0.84939	34.003	12	0.81571	28.827	12	3146	70753
Q04828	Aldo-keto reductase family 1 member C1 (EC 1.1.1.-) (20-alpha-hydroxysteroid dehydrogenase) (20-alpha-HSD) (EC 1.1.1.149) (Chlordecone reductase homolog HAKRC) (Dihydrodiol dehydrogenase 1/2) (DD1/DD2) (High-affinity hepatic bile acid-binding protein) (HBAB) (Indanol dehydrogenase) (EC 1.1.1.112) (Trans-1,2-dihydrobenzene-1,2-diol dehydrogenase) (EC 1.3.1.20)	AKR1C1	5	16	48.9	36.788	1.0899	35.728	184	0.8159	27.097	185	1544	10318
J3KP30	Deoxynucleotidyltransferase terminal-interacting protein 2	DNTTIP2	3	3	6.7	66.174	0.79379	0.54405	2	0.81597	15.052	2	1926	137053
P48634	Protein PRRC2A (HLA-B-associated transcript 2) (Large proline-rich protein BAT2) (Proline-rich and coiled-coil-containing protein 2A) (Protein G2)	PRRC2A	1	3	2.9	228.86	0.85165	10.351	4	0.81626	23.745	4	1136	25514
Q86UE4	Protein LYRIC (3D3/LYRIC) (Astrocyte elevated gene-1 protein) (AEG-1) (Lysine-rich CEACAM1 co-isolated protein) (Metadherin) (Metastasis adhesion protein)	MTDH	3	8	22.7	63.836	1.0351	42.009	11	0.81626	37.506	11	2091	42808
H0YEF3	Deleted.	0	4	3	25.9	17.12	0.84313	15.999	5	0.81633	15.33	5	2251	29817
O96008	Mitochondrial import receptor subunit TOM40 homolog (Protein Haymaker) (Translocase of outer membrane 40 kDa subunit homolog) (p38.5)	TOMM40	3	7	31.3	37.893	0.90781	44.209	14	0.81646	29.836	13	473	47014
Q9BSE5	Agmatinase, mitochondrial (EC 3.5.3.11) (Agmatine ureohydrolase) (AUH)	AGMAT	1	9	27.8	37.66	1.0574	43.624	44	0.81667	26.269	44	2579	28506
Q7Z6Z7	E3 ubiquitin-protein ligase HUWE1 (EC 2.3.2.26) (ARF-binding protein 1) (ARF-BP1) (HECT, UBA and WWE domain-containing protein 1) (HECT-type E3 ubiquitin transferase HUWE1) (Homologous to E6AP carboxyl terminus homologous protein 9) (HectH9) (Large structure of UREB1) (LASU1) (Mcl-1 ubiquitin ligase E3) (Mule) (Upstream regulatory element-binding protein 1) (URE-B1) (URE-binding protein 1)	HUWE1	2	13	4.9	481.89	0.88775	36.541	9	0.81682	25.986	9	2075	10266
Q9HAV4	Exportin-5 (Exp5) (Ran-binding protein 21)	XPO5	5	9	10.5	136.31	0.84179	26.597	14	0.81692	29.945	14	2749	13065
Q9H840	Gem-associated protein 7 (Gemin-7) (SIP3)	GEMIN7	1	1	9.9	14.536	0.66654	7.8537	4	0.81695	20.171	4	2732	144067
P00395	Cytochrome c oxidase subunit 1 (EC 7.1.1.9) (Cytochrome c oxidase polypeptide I)	MT-CO1	1	1	1.6	57.041	1.6178	11.281	3	0.81718	14.516	3	485	226117
J3QKY9	Conserved oligomeric Golgi complex subunit 1 (Fragment)	COG1	5	1	11.8	11.276	0.93561	10.134	4	0.81723	4.2816	4	2262	55445
Q9NPE3	H/ACA ribonucleoprotein complex subunit 3 (Nucleolar protein 10) (Nucleolar protein family A member 3) (snoRNP protein NOP10)	NOP10	1	3	42.2	7.7059	0.92519	37.684	3	0.81733	20.723	3	2786	103273
Q7KZ85	Transcription elongation factor SPT6 (hSPT6) (Histone chaperone suppressor of Ty6) (Tat-cotransactivator 2 protein) (Tat-CT2 protein)	SUPT6H	1	8	8.1	199.07	0.89417	33.505	5	0.81747	8.5124	5	2035	83080
Q96QD8	Sodium-coupled neutral amino acid transporter 2 (Amino acid transporter A2) (Protein 40-9-1) (Solute carrier family 38 member 2) (System A amino acid transporter 2) (System A transporter 1) (System N amino acid transporter 2)	SLC38A2	2	4	12.5	56.025	1.5035	47.043	5	0.81826	44.618	5	2482	60115
P51857	Aldo-keto reductase family 1 member D1 (EC 1.3.1.3) (3-oxo-5-beta-steroid 4-dehydrogenase) (Delta(4)-3-ketosteroid 5-beta-reductase) (Delta(4)-3-oxosteroid 5-beta-reductase)	AKR1D1	2	3	9.5	37.376	1.2069	50.16	47	0.81858	21.328	47	1217	95385
Q07021	Complement component 1 Q subcomponent-binding protein, mitochondrial (ASF/SF2-associated protein p32) (Glycoprotein gC1qBP) (C1qBP) (Hyaluronan-binding protein 1) (Mitochondrial matrix protein p32) (gC1q-R protein) (p33) (SF2AP32)	C1QBP	3	9	42.9	31.362	1.1542	59.044	42	0.81877	26.448	42	1562	7606
Q15819	Ubiquitin-conjugating enzyme E2 variant 2 (DDVit 1) (Enterocyte differentiation-associated factor 1) (EDAF-1) (Enterocyte differentiation-promoting factor 1) (EDPF-1) (MMS2 homolog) (Vitamin D3-inducible protein)	UBE2V2	3	3	32.4	16.363	0.81169	10.338	7	0.81882	11.071	7	1831	74977
O75531	Barrier-to-autointegration factor (Breakpoint cluster region protein 1) [Cleaved into: Barrier-to-autointegration factor, N-terminally processed]	BANF1	1	4	43.8	10.058	1.0467	16.21	9	0.8191	25.822	9	355	29958
Q7Z3J3	RanBP2-like and GRIP domain-containing protein 4	RGPD4	2	8	5.3	197.29	0.86582	19.839	3	0.8194	18.449	3	2058	44331
F5H1S9	tRNA pseudouridine synthase A	PUS1	8	3	9.1	41.729	1.0049	15.337	5	0.81942	33.634	5	3172	17709
Q9NQR4	Omega-amidase NIT2 (EC 3.5.1.3) (Nitrilase homolog 2)	NIT2	3	3	17	30.608	0.77267	10.424	9	0.81957	37.789	9	2799	24683
O75116	Rho-associated protein kinase 2 (EC 2.7.11.1) (Rho kinase 2) (Rho-associated, coiled-coil-containing protein kinase 2) (Rho-associated, coiled-coil-containing protein kinase II) (ROCK-II) (p164 ROCK-2)	ROCK2	7	14	17.9	160.9	0.93805	54.88	8	0.82069	15.824	8	317	29582
Q86XP3	ATP-dependent RNA helicase DDX42 (EC 3.6.4.13) (DEAD box protein 42) (RNA helicase-like protein) (RHELP) (RNA helicase-related protein) (RNAHP) (SF3b DEAD box protein) (Splicing factor 3B-associated 125 kDa protein) (SF3b125)	DDX42	4	9	19.1	102.97	0.78789	22.989	9	0.82084	29.366	8	2106	32765
Q9Y2X3	Nucleolar protein 58 (Nucleolar protein 5)	NOP58	2	11	27	59.578	0.89697	24.164	38	0.82097	19.341	38	3092	76978
Q6UX53	Methyltransferase-like protein 7B (EC 2.1.1.-)	METTL7B	2	2	10.2	27.775	0.68883	25.254	2	0.82141	20.444	2	2018	34044
P04080	Cystatin-B (CPI-B) (Liver thiol proteinase inhibitor) (Stefin-B)	CSTB	3	3	58.2	11.139	1.2049	33.392	32	0.82161	32.844	32	532	142556
Q92734	Protein TFG (TRK-fused gene protein)	TFG	4	6	24.2	43.447	1.0031	22.964	6	0.82164	28.956	6	2323	120199
G3V158	2-deoxy-D-ribose 5-phosphate aldolase (EC 4.1.2.4) (Phosphodeoxyriboaldolase)	DERA	6	2	15.2	25.113	0.94036	17.843	6	0.8217	35.632	6	3098	1227
Q9Y320	Thioredoxin-related transmembrane protein 2 (Cell proliferation-inducing gene 26 protein) (Thioredoxin domain-containing protein 14)	TMX2	6	3	7.8	34.037	1.0891	62.255	4	0.82172	41.674	4	3099	43957
J3KSI4	Mannose-P-dolichol utilization defect 1 protein	MPDU1	13	2	38.5	5.7856	1.0115	18.658	9	0.82274	11.946	9	336	911
K7EQ23	NPC intracellular cholesterol transporter 1 (Fragment)	NPC1	2	1	1.3	108.06	0.98823	10.601	5	0.8232	33.897	5	190	57660
D6RGE2	Isochorismatase domain-containing protein 1 (Fragment)	ISOC1	2	3	21.3	20.239	0.89269	9.9782	7	0.82402	8.9353	7	2390	69646
Q8IX18	Probable ATP-dependent RNA helicase DHX40 (EC 3.6.4.13) (DEAH box protein 40) (Protein PAD)	DHX40	6	2	3	88.559	0.75167	47.766	2	0.82415	40.387	2	2131	84688
P53597	Succinate--CoA ligase [ADP/GDP-forming] subunit alpha, mitochondrial (EC 6.2.1.4) (EC 6.2.1.5) (Succinyl-CoA synthetase subunit alpha) (SCS-alpha)	SUCLG1	2	7	27.5	36.249	0.75926	25.406	40	0.82507	28.437	40	1251	67208
P60953	Cell division control protein 42 homolog (EC 3.6.5.2) (G25K GTP-binding protein)	CDC42	2	3	19.9	21.258	0.79337	17.479	15	0.82514	17.046	15	1318	154171
P30046	D-dopachrome decarboxylase (EC 4.1.1.84) (D-dopachrome tautomerase) (Phenylpyruvate tautomerase II)	DDT	5	8	56.8	12.712	1.1967	44.2	22	0.82534	26.246	22	928	54913
Q9Y295	Developmentally-regulated GTP-binding protein 1 (DRG-1) (Neural precursor cell expressed developmentally down-regulated protein 3) (NEDD-3) (Translation factor GTPase DRG1) (TRAFAC GTPase DRG1) (EC 3.6.5.-)	DRG1	3	9	35.4	40.542	0.84497	20.243	19	0.82599	14.293	19	3071	32450
Q5VYK3	Proteasome adapter and scaffold protein ECM29 (Ecm29 proteasome adapter and scaffold) (Proteasome-associated protein ECM29 homolog)	ECPAS	5	11	8.6	204.29	1.0553	39.34	14	0.82599	59.196	14	1954	8003
H0Y8G5	Heterogeneous nuclear ribonucleoprotein D0 (Fragment)	HNRNPD	7	12	44.6	29.667	0.83703	29.374	69	0.82603	28.081	69	3256	34263
O94906	Pre-mRNA-processing factor 6 (Androgen receptor N-terminal domain-transactivating protein 1) (ANT-1) (PRP6 homolog) (U5 snRNP-associated 102 kDa protein) (U5-102 kDa protein)	PRPF6	1	7	8.7	106.92	0.71284	38.532	7	0.82604	18.254	7	406	9248
D6RIY6	Exosome complex component RRP45 (Exosome component 9)	EXOSC9	5	2	5.7	46.977	0.87998	11.313	5	0.82605	15.745	5	1554	55195
Q13177	Serine/threonine-protein kinase PAK 2 (EC 2.7.11.1) (Gamma-PAK) (PAK65) (S6/H4 kinase) (p21-activated kinase 2) (PAK-2) (p58) [Cleaved into: PAK-2p27 (p27); PAK-2p34 (p34) (C-t-PAK2)]	PAK2	9	13	43.1	58.042	0.94645	35.623	23	0.82643	45.307	23	1625	16334
H0YN26	Acidic leucine-rich nuclear phosphoprotein 32 family member A	ANP32A	5	5	27.7	19.997	1.5168	32.502	21	0.82663	23.152	21	1044	34977
Q9HC35	Echinoderm microtubule-associated protein-like 4 (EMAP-4) (Restrictedly overexpressed proliferation-associated protein) (Ropp 120)	EML4	2	29	39.2	108.91	0.99023	44.728	97	0.82675	30.583	97	2756	1659
P30044	Peroxiredoxin-5, mitochondrial (EC 1.11.1.24) (Alu corepressor 1) (Antioxidant enzyme B166) (AOEB166) (Liver tissue 2D-page spot 71B) (PLP) (Peroxiredoxin V) (Prx-V) (Peroxisomal antioxidant enzyme) (TPx type VI) (Thioredoxin peroxidase PMP20) (Thioredoxin-dependent peroxiredoxin 5)	PRDX5	1	10	55.6	22.086	0.88984	42.402	55	0.82676	24.016	54	927	14505
Q13043	Serine/threonine-protein kinase 4 (EC 2.7.11.1) (Mammalian STE20-like protein kinase 1) (MST-1) (STE20-like kinase MST1) (Serine/threonine-protein kinase Krs-2) [Cleaved into: Serine/threonine-protein kinase 4 37kDa subunit (MST1/N); Serine/threonine-protein kinase 4 18kDa subunit (MST1/C)]	STK4	4	3	8.8	55.63	0.79985	25.632	5	0.82682	18.338	5	1611	10597
H0Y8N7	39S ribosomal protein L1, mitochondrial (Fragment)	MRPL1	2	4	26.4	26.614	0.8195	5.4506	5	0.82714	28.768	5	2646	59533
P51991	Heterogeneous nuclear ribonucleoprotein A3 (hnRNP A3)	HNRNPA3	2	10	28.3	39.594	0.85838	35.668	48	0.82726	19.845	48	1221	42767
P39748	Flap endonuclease 1 (FEN-1) (EC 3.1.-.-) (DNase IV) (Flap structure-specific endonuclease 1) (Maturation factor 1) (MF1) (hFEN-1)	FEN1	3	8	27.9	42.592	0.99605	29.747	21	0.82768	29.823	21	1045	40826
O00151	PDZ and LIM domain protein 1 (C-terminal LIM domain protein 1) (Elfin) (LIM domain protein CLP-36)	PDLIM1	1	17	67.2	36.071	0.81318	48.596	54	0.82805	59.827	54	105	1678
P21964	Catechol O-methyltransferase (EC 2.1.1.6)	COMT	5	3	12.9	30.037	0.94005	33.399	4	0.82806	19.668	4	825	11951
P11717	Cation-independent mannose-6-phosphate receptor (CI Man-6-P receptor) (CI-MPR) (M6PR) (300 kDa mannose 6-phosphate receptor) (MPR 300) (Insulin-like growth factor 2 receptor) (Insulin-like growth factor II receptor) (IGF-II receptor) (M6P/IGF2 receptor) (M6P/IGF2R) (CD antigen CD222)	IGF2R	2	20	11	274.37	0.76968	21.105	20	0.82819	29.935	20	679	4165
Q96I99	Succinate--CoA ligase [GDP-forming] subunit beta, mitochondrial (EC 6.2.1.4) (GTP-specific succinyl-CoA synthetase subunit beta) (G-SCS) (GTPSCS) (Succinyl-CoA synthetase beta-G chain) (SCS-betaG)	SUCLG2	3	10	29.2	46.51	1.005	27.6	22	0.82822	28.372	22	2441	32639
P09874	Poly [ADP-ribose] polymerase 1 (PARP-1) (EC 2.4.2.30) (ADP-ribosyltransferase diphtheria toxin-like 1) (ARTD1) (DNA ADP-ribosyltransferase PARP1) (EC 2.4.2.-) (NAD(+) ADP-ribosyltransferase 1) (ADPRT 1) (Poly[ADP-ribose] synthase 1) (Protein poly-ADP-ribosyltransferase PARP1) (EC 2.4.2.-)	PARP1	3	20	28.9	113.08	0.84241	20.031	46	0.82827	18.85	46	637	6527
Q13724	Mannosyl-oligosaccharide glucosidase (EC 3.2.1.106) (Processing A-glucosidase I)	MOGS	10	10	17.2	91.916	1.0126	34.057	33	0.82866	34.508	33	1680	26217
Q9Y697	Cysteine desulfurase, mitochondrial (EC 2.8.1.7)	NFS1	2	5	18.8	50.195	0.79715	9.5429	3	0.8287	14.951	3	3179	46823
O94760	N(G),N(G)-dimethylarginine dimethylaminohydrolase 1 (DDAH-1) (Dimethylarginine dimethylaminohydrolase 1) (EC 3.5.3.18) (DDAHI) (Dimethylargininase-1)	DDAH1	2	7	36.8	31.121	0.96128	18.333	12	0.82915	35.721	12	392	8576
Q9NUQ2	1-acyl-sn-glycerol-3-phosphate acyltransferase epsilon (EC 2.3.1.51) (1-acylglycerol-3-phosphate O-acyltransferase 5) (1-AGP acyltransferase 5) (1-AGPAT 5) (Lysophosphatidic acid acyltransferase epsilon) (LPAAT-epsilon)	AGPAT5	1	1	3.3	42.072	0.81372	4.2179	3	0.82923	6.4517	3	2843	214055
Q9NYL9	Tropomodulin-3 (Ubiquitous tropomodulin) (U-Tmod)	TMOD3	4	6	30.1	39.594	0.69211	30.731	11	0.83007	38.798	11	2895	53728
Q8N7H5	RNA polymerase II-associated factor 1 homolog (hPAF1) (Pancreatic differentiation protein 2)	PAF1	2	5	12.2	59.975	0.67155	10.094	6	0.83013	10.634	6	2180	9473
Q99733	Nucleosome assembly protein 1-like 4 (Nucleosome assembly protein 2) (NAP-2)	NAP1L4	13	6	26.7	42.823	0.83788	16.598	19	0.83015	22.186	19	2529	4795
Q99714	3-hydroxyacyl-CoA dehydrogenase type-2 (EC 1.1.1.35) (17-beta-hydroxysteroid dehydrogenase 10) (17-beta-HSD 10) (EC 1.1.1.51) (2-methyl-3-hydroxybutyryl-CoA dehydrogenase) (MHBD) (3-hydroxy-2-methylbutyryl-CoA dehydrogenase) (EC 1.1.1.178) (3-hydroxyacyl-CoA dehydrogenase type II) (Endoplasmic reticulum-associated amyloid beta-peptide-binding protein) (Mitochondrial ribonuclease P protein 2) (Mit…	HSD17B10	2	11	64	26.923	0.90726	18.148	24	0.83037	25.951	24	2528	33747
Q9Y696	Chloride intracellular channel protein 4 (Intracellular chloride ion channel protein p64H1)	CLIC4	1	8	48.2	28.772	1.076	31.671	12	0.83043	17.424	12	3178	15041
Q00688	Peptidyl-prolyl cis-trans isomerase FKBP3 (PPIase FKBP3) (EC 5.2.1.8) (25 kDa FK506-binding protein) (25 kDa FKBP) (FKBP-25) (FK506-binding protein 3) (FKBP-3) (Immunophilin FKBP25) (Rapamycin-selective 25 kDa immunophilin) (Rotamase)	FKBP3	2	8	32.1	25.177	0.8156	11.939	7	0.83057	16.795	7	1504	26635
P67775	Serine/threonine-protein phosphatase 2A catalytic subunit alpha isoform (PP2A-alpha) (EC 3.1.3.16) (Replication protein C) (RP-C)	PPP2CA	8	4	17.5	35.594	1.0999	21.915	5	0.83155	22.785	5	1437	27675
Q15029	116 kDa U5 small nuclear ribonucleoprotein component (Elongation factor Tu GTP-binding domain-containing protein 2) (SNU114 homolog) (hSNU114) (U5 snRNP-specific protein, 116 kDa) (U5-116 kDa)	EFTUD2	5	19	32.4	109.43	0.92097	29.082	35	0.83164	32.807	35	1767	44739
Q5UIP0	Telomere-associated protein RIF1 (Rap1-interacting factor 1 homolog)	RIF1	3	6	3.6	274.46	1.2902	23.604	4	0.83178	32.151	4	1945	69307
Q8TAE8	Growth arrest and DNA damage-inducible proteins-interacting protein 1 (39S ribosomal protein L59, mitochondrial) (MRP-L59) (CKII beta-associating protein) (CR6-interacting factor 1) (CRIF1) (Mitochondrial large ribosomal subunit protein mL64) (Papillomavirus L2-interacting nuclear protein 1) (PLINP) (PLINP-1) (p53-responsive gene 6 protein)	GADD45GIP1	1	5	24.8	25.384	0.89283	14.757	7	0.83204	20.28	7	2231	537
Q13404	Ubiquitin-conjugating enzyme E2 variant 1 (UEV-1) (CROC-1) (TRAF6-regulated IKK activator 1 beta Uev1A)	UBE2V1	7	5	46.3	16.495	0.93401	25.863	19	0.83216	13.943	19	1643	2787
O75822	Eukaryotic translation initiation factor 3 subunit J (eIF3j) (Eukaryotic translation initiation factor 3 subunit 1) (eIF-3-alpha) (eIF3 p35)	EIF3J	3	6	30.6	29.062	0.8872	26.242	11	0.83278	25.312	11	369	32
Q9UJS0	Calcium-binding mitochondrial carrier protein Aralar2 (Citrin) (Mitochondrial aspartate glutamate carrier 2) (Solute carrier family 25 member 13)	SLC25A13	2	16	28.9	74.175	0.96168	33.08	62	0.83281	25.355	63	2990	9220
Q99459	Cell division cycle 5-like protein (Cdc5-like protein) (Pombe cdc5-related protein)	CDC5L	1	14	27.9	92.25	0.86285	37.478	14	0.83287	38.806	14	2504	18984
O94905	Erlin-2 (Endoplasmic reticulum lipid raft-associated protein 2) (Stomatin-prohibitin-flotillin-HflC/K domain-containing protein 2) (SPFH domain-containing protein 2)	ERLIN2	3	9	31	37.839	0.80409	27.346	26	0.833	16.216	26	405	33054
A0A087X0D5	Pro-cathepsin H	CTSH	3	2	9	36.269	1.0623	56.404	2	0.83305	11.638	2	635	68069
O75691	Small subunit processome component 20 homolog (Down-regulated in metastasis protein) (Novel nucleolar protein 73) (NNP73) (Protein Key-1A6)	UTP20	1	3	1.6	318.38	0.63272	1.7781	2	0.8339	19.814	2	363	56379
D6R9P3	Heterogeneous nuclear ribonucleoprotein A/B	HNRNPAB	4	6	17.9	30.302	0.97626	31.963	14	0.83391	15.446	14	3235	52555
O75369	Filamin-B (FLN-B) (ABP-278) (ABP-280 homolog) (Actin-binding-like protein) (Beta-filamin) (Filamin homolog 1) (Fh1) (Filamin-3) (Thyroid autoantigen) (Truncated actin-binding protein) (Truncated ABP)	FLNB	5	88	48	278.16	0.79409	31.108	310	0.834	27.905	311	340	1243
O95104	SR-related and CTD-associated factor 4 (CTD-binding SR-like protein RA4) (Splicing factor, arginine/serine-rich 15)	SCAF4	1	4	3.7	125.87	0.95484	16.34	7	0.83415	35.596	7	414	34884
P62633	Cellular nucleic acid-binding protein (CNBP) (Zinc finger protein 9)	CNBP	1	3	23.2	19.463	1.2049	12.711	4	0.8344	42.278	4	1391	28646
Q14683	Structural maintenance of chromosomes protein 1A (SMC protein 1A) (SMC-1-alpha) (SMC-1A) (Sb1.8)	SMC1A	4	8	10.3	143.23	1.1139	15.64	5	0.8346	11.472	5	1736	6664
Q6P2Q9	Pre-mRNA-processing-splicing factor 8 (220 kDa U5 snRNP-specific protein) (PRP8 homolog) (Splicing factor Prp8) (p220)	PRPF8	3	26	15.6	273.6	0.93911	36.27	25	0.83471	35.504	25	1994	9396
Q12824	SWI/SNF-related matrix-associated actin-dependent regulator of chromatin subfamily B member 1 (BRG1-associated factor 47) (BAF47) (Integrase interactor 1 protein) (SNF5 homolog) (hSNF5)	SMARCB1	7	2	12.7	44.141	0.59321	10.056	4	0.83594	9.5864	3	1595	153333
Q6PIU2	Neutral cholesterol ester hydrolase 1 (NCEH) (EC 3.1.1.-) (Arylacetamide deacetylase-like 1)	NCEH1	4	4	16.4	45.807	0.772	25.506	12	0.83653	19.575	12	2004	82082
Q9UIA9	Exportin-7 (Exp7) (Ran-binding protein 16)	XPO7	3	4	4.6	123.91	0.91145	2.0631	2	0.83659	1.6474	2	2984	16161
A0A0A0MRN4	DBIRD complex subunit ZNF326 (Zinc finger protein 326, isoform CRA_c)	ZNF326	3	5	15.6	55.57	0.99278	20.071	7	0.83683	25.343	7	1917	50776
Q15365	Poly(rC)-binding protein 1 (Alpha-CP1) (Heterogeneous nuclear ribonucleoprotein E1) (hnRNP E1) (Nucleic acid-binding protein SUB2.3)	PCBP1	3	12	56.5	37.497	0.84718	38.383	87	0.83725	24.728	87	1799	11756
P04040	Catalase (EC 1.11.1.6)	CAT	1	12	32.1	59.755	0.86723	34.147	30	0.83738	33.238	30	529	2439
P51649	Succinate-semialdehyde dehydrogenase, mitochondrial (EC 1.2.1.24) (Aldehyde dehydrogenase family 5 member A1) (NAD(+)-dependent succinic semialdehyde dehydrogenase)	ALDH5A1	2	10	25.8	57.214	1.0128	20.79	39	0.83746	16.623	39	1211	51838
P12268	Inosine-5'-monophosphate dehydrogenase 2 (IMP dehydrogenase 2) (IMPD 2) (IMPDH 2) (EC 1.1.1.205) (IMPDH-II)	IMPDH2	3	11	24.5	55.804	1.0022	18.46	34	0.83788	23.01	34	686	42618
P15121	Aldo-keto reductase family 1 member B1 (EC 1.1.1.300) (EC 1.1.1.372) (EC 1.1.1.54) (Aldehyde reductase) (Aldose reductase) (AR) (EC 1.1.1.21)	AKR1B1	3	10	30.1	35.853	0.84291	41.699	32	0.83791	22.758	32	729	40066
E5RHI8	Protein FAM114A2 (Fragment)	FAM114A2	4	1	18.4	13.267	0.95849	5.0585	3	0.83825	8.0081	3	2821	168918
P08319	All-trans-retinol dehydrogenase [NAD(+)] ADH4 (EC 1.1.1.105) (Alcohol dehydrogenase 4) (Alcohol dehydrogenase class II pi chain)	ADH4	8	7	27.4	40.221	1.0282	24.33	9	0.83847	34.643	9	607	13708
P62316	Small nuclear ribonucleoprotein Sm D2 (Sm-D2) (snRNP core protein D2)	SNRPD2	3	9	55.1	13.527	0.75515	27.864	38	0.83889	23.221	38	1384	43065
Q8IYB8	ATP-dependent RNA helicase SUPV3L1, mitochondrial (EC 3.6.4.13) (Suppressor of var1 3-like protein 1) (SUV3-like protein 1)	SUPV3L1	1	6	9.2	87.99	0.8689	18.226	11	0.83966	33.179	11	2141	46917
J3KNP2	Transducin beta-like protein 3 (Fragment)	TBL3	3	6	15.9	76.979	0.80327	7.4055	5	0.83978	14.189	5	1590	1768
A0A1W2PPS1	Heterogeneous nuclear ribonucleoprotein U	HNRNPU	15	23	28.2	88.317	1.005	44.97	148	0.83998	40.95	148	1506	29954
Q10567	AP-1 complex subunit beta-1 (Adaptor protein complex AP-1 subunit beta-1) (Adaptor-related protein complex 1 subunit beta-1) (Beta-1-adaptin) (Beta-adaptin 1) (Clathrin assembly protein complex 1 beta large chain) (Golgi adaptor HA1/AP1 adaptin beta subunit)	AP1B1	2	9	11.9	104.64	0.77232	14.547	12	0.84002	14.552	12	1585	26571
P07954	Fumarate hydratase, mitochondrial (Fumarase) (HsFH) (EC 4.2.1.2)	FH	1	12	29.8	54.636	0.8979	26.787	50	0.84019	24.28	50	597	505
P62937	Peptidyl-prolyl cis-trans isomerase A (PPIase A) (EC 5.2.1.8) (Cyclophilin A) (Cyclosporin A-binding protein) (Rotamase A) [Cleaved into: Peptidyl-prolyl cis-trans isomerase A, N-terminally processed]	PPIA	12	13	74.5	18.012	0.87787	35.666	142	0.84045	19.313	142	1417	44583
A0A0C4DFM1	Transmembrane 9 superfamily member	TM9SF4	4	8	16.2	72.54	0.84806	20.477	25	0.84055	22.869	25	2302	27573
Q92890	Ubiquitin recognition factor in ER-associated degradation protein 1 (Ubiquitin fusion degradation protein 1) (UB fusion protein 1)	UFD1	4	4	16.3	34.5	0.87239	15.87	12	0.84067	18.791	12	2337	59690
Q9NVI7	ATPase family AAA domain-containing protein 3A	ATAD3A	1	10	19.4	71.368	0.94688	56.489	19	0.84087	22.915	19	2856	29381
H3BV16	Complex I-PDSW (NADH dehydrogenase [ubiquinone] 1 beta subcomplex subunit 10) (NADH-ubiquinone oxidoreductase PDSW subunit) (Fragment)	NDUFB10	3	3	27.5	17.385	0.70379	15.696	9	0.84109	15.701	9	472	155027
P30041	Peroxiredoxin-6 (EC 1.11.1.27) (1-Cys peroxiredoxin) (1-Cys PRX) (24 kDa protein) (Acidic calcium-independent phospholipase A2) (aiPLA2) (EC 3.1.1.4) (Antioxidant protein 2) (Glutathione-dependent peroxiredoxin) (Liver 2D page spot 40) (Non-selenium glutathione peroxidase) (NSGPx) (Red blood cells page spot 12)	PRDX6	1	18	63.4	25.035	1.0314	55.285	98	0.84119	29.58	98	925	31450
Q4KMQ2	Anoctamin-6 (Small-conductance calcium-activated nonselective cation channel) (SCAN channel) (Transmembrane protein 16F)	ANO6	1	2	3.4	106.16	0.91264	9.2148	2	0.84166	11.954	2	1897	87982
Q96EY7	Pentatricopeptide repeat domain-containing protein 3, mitochondrial (28S ribosomal protein S39, mitochondrial) (MRP-S39) (Mitochondrial small ribosomal subunit protein mS39) (Transformation-related gene 15 protein) (TRG-15)	PTCD3	3	8	16.3	78.549	0.83352	14.517	11	0.8419	15.994	11	2408	32455
Q9Y617	Phosphoserine aminotransferase (EC 2.6.1.52) (Phosphohydroxythreonine aminotransferase) (PSAT)	PSAT1	1	13	40.3	40.422	1.0926	37.959	64	0.84192	23.484	64	3173	13315
Q9Y281	Cofilin-2 (Cofilin, muscle isoform)	CFL2	3	7	49.4	18.736	0.93873	23.152	18	0.84232	15.588	18	3067	20982
C9JZI1	Replication factor C subunit 4	RFC4	8	5	21.1	36.877	1.127	27.491	8	0.84268	35.879	8	995	11596
P63165	Small ubiquitin-related modifier 1 (SUMO-1) (GAP-modifying protein 1) (GMP1) (SMT3 homolog 3) (Sentrin) (Ubiquitin-homology domain protein PIC1) (Ubiquitin-like protein SMT3C) (Smt3C) (Ubiquitin-like protein UBL1)	SUMO1	6	2	18.8	11.557	0.86307	21.843	3	0.84277	14.382	3	103	57203
Q99829	Copine-1 (Chromobindin 17) (Copine I)	CPNE1	18	8	15.6	59.058	1.076	35.161	14	0.84282	26.743	14	2536	19237
A0A3B3ITZ9	Thyroid hormone receptor-associated protein 3	THRAP3	2	6	9	103.52	0.94904	17.829	20	0.8432	15.033	20	3089	20372
P32189	Glycerol kinase (GK) (Glycerokinase) (EC 2.7.1.30) (ATP:glycerol 3-phosphotransferase)	GK	9	10	20.9	61.244	0.85897	18.45	36	0.84334	20.306	36	968	25789
C9J712	Profilin	PFN2	6	3	45.1	9.7982	0.64296	66.494	4	0.84365	23.06	4	988	37840
Q9UKX7	Nuclear pore complex protein Nup50 (50 kDa nucleoporin) (Nuclear pore-associated protein 60 kDa-like) (Nucleoporin Nup50)	NUP50	2	6	19.9	50.144	0.87932	39.948	5	0.84376	44.846	5	3009	59993
Q8WTT2	Nucleolar complex protein 3 homolog (NOC3 protein homolog) (Factor for adipocyte differentiation 24) (NOC3-like protein) (Nucleolar complex-associated protein 3-like protein)	NOC3L	1	2	3.9	92.547	1.1558	19.172	4	0.84381	16.552	4	2261	52817
Q13435	Splicing factor 3B subunit 2 (Pre-mRNA-splicing factor SF3b 145 kDa subunit) (SF3b145) (Spliceosome-associated protein 145) (SAP 145)	SF3B2	5	18	34.1	100.23	0.94954	23.754	38	0.84402	32.998	39	1650	3130
P23246	Splicing factor, proline- and glutamine-rich (100 kDa DNA-pairing protein) (hPOMp100) (DNA-binding p52/p100 complex, 100 kDa subunit) (Polypyrimidine tract-binding protein-associated-splicing factor) (PSF) (PTB-associated-splicing factor)	SFPQ	3	21	39.2	76.149	0.91277	42.831	61	0.84425	34.72	61	843	6145
H7C1D4	Component 3 of promoter of RISC (Translin) (Fragment)	TSN	3	3	18.9	21.01	0.89548	11.238	5	0.84441	14.047	5	1820	42034
Q8TB37	Iron-sulfur protein NUBPL (IND1 homolog) (Nucleotide-binding protein-like) (huInd1)	NUBPL	4	3	17.9	34.082	1.1875	16.315	4	0.84448	21.509	4	2238	41780
Q86V81	THO complex subunit 4 (Tho4) (Ally of AML-1 and LEF-1) (Aly/REF export factor) (Transcriptional coactivator Aly/REF) (bZIP-enhancing factor BEF)	ALYREF	2	7	40.1	26.888	0.86355	25.584	34	0.84482	22.323	34	2095	4950
S4R3N9	Sideroflexin-3	SFXN3	4	4	32.8	19.605	0.87837	26.753	11	0.84505	33.025	11	2623	9480
P51654	Glypican-3 (GTR2-2) (Intestinal protein OCI-5) (MXR7) [Cleaved into: Glypican-3 alpha subunit; Glypican-3 beta subunit]	GPC3	2	6	15.9	65.562	1.0078	28.535	23	0.84535	32.166	23	1212	117742
Q06587	E3 ubiquitin-protein ligase RING1 (EC 2.3.2.27) (Polycomb complex protein RING1) (RING finger protein 1) (RING-type E3 ubiquitin transferase RING1) (Really interesting new gene 1 protein)	RING1	3	2	6.2	42.429	0.78812	7.6312	2	0.8459	19.636	2	1558	53748
E9PCY7	Heterogeneous nuclear ribonucleoprotein H	HNRNPH1	24	14	43.4	47.087	0.9195	14.976	105	0.84591	20.356	105	963	22701
P08559	Pyruvate dehydrogenase E1 component subunit alpha, somatic form, mitochondrial (EC 1.2.4.1) (PDHE1-A type I)	PDHA1	5	6	19.2	43.295	0.944	24.777	24	0.84596	31.067	24	608	9649
O95573	Long-chain-fatty-acid--CoA ligase 3 (EC 6.2.1.3) (Arachidonate--CoA ligase) (EC 6.2.1.15) (Long-chain acyl-CoA synthetase 3) (LACS 3)	ACSL3	4	19	37.5	80.419	0.95661	32.667	35	0.84606	30.816	35	448	7341
Q4VC31	Coiled-coil domain-containing protein 58	CCDC58	3	5	41	16.62	0.88141	14.227	23	0.84613	10.354	23	1900	2332
P49247	Ribose-5-phosphate isomerase (EC 5.3.1.6) (Phosphoriboisomerase)	RPIA	1	3	15.4	33.269	1.2119	34.041	7	0.84627	26.433	7	1146	68175
P45974	Ubiquitin carboxyl-terminal hydrolase 5 (EC 3.4.19.12) (Deubiquitinating enzyme 5) (Isopeptidase T) (Ubiquitin thioesterase 5) (Ubiquitin-specific-processing protease 5)	USP5	1	9	16.7	95.785	0.76665	20.65	23	0.84642	14.401	23	1097	31893
P09651	Heterogeneous nuclear ribonucleoprotein A1 (hnRNP A1) (Helix-destabilizing protein) (Single-strand RNA-binding protein) (hnRNP core protein A1) [Cleaved into: Heterogeneous nuclear ribonucleoprotein A1, N-terminally processed]	HNRNPA1	9	8	27.2	38.746	1.0312	36.884	61	0.84658	67.44	61	633	39954
Q99879	Histone H2B type 1-M (Histone H2B.e) (H2B/e)	H2BC14	12	10	61.1	13.989	0.91015	38.241	203	0.84707	19.527	203	305	16554
P13284	Gamma-interferon-inducible lysosomal thiol reductase (EC 1.8.-.-) (Gamma-interferon-inducible protein IP-30) (Legumaturain)	IFI30	1	1	4.4	27.963	1.1471	8.5059	5	0.8472	14.695	5	696	70862
P21912	Succinate dehydrogenase [ubiquinone] iron-sulfur subunit, mitochondrial (EC 1.3.5.1) (Iron-sulfur subunit of complex II) (Ip)	SDHB	3	5	23.6	31.629	1.0594	47.717	7	0.84782	30.063	7	824	35213
A0A3B3ISL2	Paternally-expressed gene 3 protein (Fragment)	PEG3	9	20	22.4	140.87	0.84661	15.589	30	0.84812	27.59	30	2671	7571
P78527	DNA-dependent protein kinase catalytic subunit (DNA-PK catalytic subunit) (DNA-PKcs) (EC 2.7.11.1) (DNPK1) (p460)	PRKDC	2	79	22.8	469.08	0.92349	38.546	196	0.84877	24.961	195	1465	1958
A0A0C4DGL3	Deoxyuridine 5'-triphosphate nucleotidohydrolase (dUTPase) (EC 3.6.1.23) (dUTP pyrophosphatase)	DUT	8	4	42.6	15.395	0.84743	21.472	6	0.84913	40.635	6	976	1514
P06730	Eukaryotic translation initiation factor 4E (eIF-4E) (eIF4E) (eIF-4F 25 kDa subunit) (mRNA cap-binding protein)	EIF4E	4	6	35.9	25.097	1.1191	21.827	11	0.84918	19.347	10	570	23723
P02675	Fibrinogen beta chain [Cleaved into: Fibrinopeptide B; Fibrinogen beta chain]	FGB	2	3	7.7	55.928	0.74945	22.09	10	0.84922	30.419	10	513	35853
E9PHY5	Band 4.1-like protein 2	EPB41L2	23	12	16	104.36	0.83514	12.283	11	0.84922	24.723	11	241	42837
C9JL85	Myotrophin	MTPN	2	3	76.9	5.7044	0.83958	12.54	9	0.84936	14.915	9	1303	27298
P62304	Small nuclear ribonucleoprotein E (snRNP-E) (Sm protein E) (Sm-E) (SmE)	SNRPE	2	3	29.3	10.803	2.9598	176.41	4	0.84947	10.255	4	1380	64899
O43583	Density-regulated protein (DRP) (Protein DRP1) (Smooth muscle cell-associated protein 3) (SMAP-3)	DENR	2	3	23.7	22.092	1.3972	14.338	4	0.84954	7.1303	4	243	110810
Q8IXM3	39S ribosomal protein L41, mitochondrial (L41mt) (MRP-L41) (39S ribosomal protein L27 homolog) (Bcl-2-interacting mitochondrial ribosomal protein L41) (Cell proliferation-inducing gene 3 protein) (MRP-L27 homolog) (Mitochondrial large ribosomal subunit protein mL41)	MRPL41	1	2	16.1	15.383	1.976	40.372	3	0.84979	10.623	3	2137	48727
Q86X55	Histone-arginine methyltransferase CARM1 (EC 2.1.1.319) (Coactivator-associated arginine methyltransferase 1) (Protein arginine N-methyltransferase 4)	CARM1	3	2	3.8	65.853	0.92083	34.296	5	0.85026	28.572	5	2105	27850
Q9NPH2	Inositol-3-phosphate synthase 1 (IPS 1) (EC 5.5.1.4) (Myo-inositol 1-phosphate synthase) (MI-1-P synthase) (MIP synthase) (hIPS) (Myo-inositol 1-phosphate synthase A1) (hINO1)	ISYNA1	3	5	14.9	61.067	0.50435	7.0357	2	0.85031	1.1825	2	2788	18167
E9PE24	Visinin-like protein 1 (Fragment)	VSNL1	4	3	28.8	12.127	0.83083	35.411	8	0.85034	16.599	8	1395	53307
Q09161	Nuclear cap-binding protein subunit 1 (80 kDa nuclear cap-binding protein) (CBP80) (NCBP 80 kDa subunit)	NCBP1	1	4	8.1	91.838	0.89082	21.528	10	0.85052	11.681	10	1581	23434
P16219	Short-chain specific acyl-CoA dehydrogenase, mitochondrial (SCAD) (EC 1.3.8.1) (Butyryl-CoA dehydrogenase)	ACADS	2	7	24.3	44.297	0.82438	16.32	8	0.85109	28.122	8	746	37730
Q9H1A4	Anaphase-promoting complex subunit 1 (APC1) (Cyclosome subunit 1) (Mitotic checkpoint regulator) (Testis-specific gene 24 protein)	ANAPC1	1	1	1.1	216.5	0.74213	50.275	2	0.85133	34.309	2	2686	59964
P41250	Glycine--tRNA ligase (EC 6.1.1.14) (Diadenosine tetraphosphate synthetase) (Ap4A synthetase) (EC 2.7.7.-) (Glycyl-tRNA synthetase) (GlyRS) (Glycyl-tRNA synthetase 1)	GARS1	2	14	24.5	83.165	1.0264	31.554	27	0.85139	33.054	27	1065	18348
P31948	Stress-induced-phosphoprotein 1 (STI1) (Hsc70/Hsp90-organizing protein) (Hop) (Renal carcinoma antigen NY-REN-11) (Transformation-sensitive protein IEF SSP 3521)	STIP1	4	29	51.2	62.639	0.99095	32.749	98	0.85144	29.338	98	966	552
P40939	Trifunctional enzyme subunit alpha, mitochondrial (78 kDa gastrin-binding protein) (Monolysocardiolipin acyltransferase) (EC 2.3.1.-) (TP-alpha) [Includes: Long-chain enoyl-CoA hydratase (EC 4.2.1.17); Long chain 3-hydroxyacyl-CoA dehydrogenase (EC 1.1.1.211)]	HADHA	5	32	46	82.999	0.995	30.85	167	0.85144	21.994	167	1059	14384
Q13126	S-methyl-5'-thioadenosine phosphorylase (EC 2.4.2.28) (5'-methylthioadenosine phosphorylase) (MTA phosphorylase) (MTAP) (MTAPase)	MTAP	6	6	33.9	31.236	0.77888	39.545	12	0.85215	15.58	12	1618	74704
O00483	Cytochrome c oxidase subunit NDUFA4 (Complex I-MLRQ) (CI-MLRQ) (NADH-ubiquinone oxidoreductase MLRQ subunit)	NDUFA4	1	3	37	9.3697	1.1737	12.955	5	0.85234	9.2395	5	135	62861
Q9BY77	Polymerase delta-interacting protein 3 (46 kDa DNA polymerase delta interaction protein) (p46) (S6K1 Aly/REF-like target) (SKAR)	POLDIP3	6	8	32.3	46.089	0.7613	14.549	12	0.85277	26.228	12	2642	4883
P32322	Pyrroline-5-carboxylate reductase 1, mitochondrial (P5C reductase 1) (P5CR 1) (EC 1.5.1.2)	PYCR1	13	15	51.4	33.36	0.84487	39.894	76	0.85281	28.027	75	969	27986
Q96C36	Pyrroline-5-carboxylate reductase 2 (P5C reductase 2) (P5CR 2) (EC 1.5.1.2)	PYCR2	6	7	27.5	33.637	0.82164	33.051	14	0.85284	39.615	14	2384	87344
Q12797	Aspartyl/asparaginyl beta-hydroxylase (EC 1.14.11.16) (Aspartate beta-hydroxylase) (ASP beta-hydroxylase) (Peptide-aspartate beta-dioxygenase)	ASPH	8	7	15.3	85.862	0.66915	8.3618	11	0.85297	17.275	11	1593	63357
C9IYN3	Heterogeneous nuclear ribonucleoprotein L-like (Heterogeneous nuclear ribonucleoprotein L-like, isoform CRA_a)	HNRNPLL	6	7	16.6	59.663	0.94557	14.977	3	0.85308	7.3953	3	2276	1863
Q8NFX7	Syntaxin-binding protein 6 (Amisyn)	STXBP6	1	1	10	23.554	1.0112	29.606	3	0.8533	23.766	3	2225	93321
Q15008	26S proteasome non-ATPase regulatory subunit 6 (26S proteasome regulatory subunit RPN7) (26S proteasome regulatory subunit S10) (Breast cancer-associated protein SGA-113M) (Phosphonoformate immuno-associated protein 4) (Proteasome regulatory particle subunit p44S10) (p42A)	PSMD6	2	3	8.5	45.531	0.47345	41.34	5	0.85338	47.79	5	1761	82607
Q08945	FACT complex subunit SSRP1 (Chromatin-specific transcription elongation factor 80 kDa subunit) (Facilitates chromatin transcription complex 80 kDa subunit) (FACT 80 kDa subunit) (FACTp80) (Facilitates chromatin transcription complex subunit SSRP1) (Recombination signal sequence recognition protein 1) (Structure-specific recognition protein 1) (hSSRP1) (T160)	SSRP1	4	18	27.2	81.074	0.90806	29.404	45	0.85365	23.377	45	1577	5560
Q9HAV7	GrpE protein homolog 1, mitochondrial (HMGE) (Mt-GrpE#1)	GRPEL1	1	6	35.5	24.279	1.0831	18.695	19	0.85365	14.931	19	2750	12456
O75643	U5 small nuclear ribonucleoprotein 200 kDa helicase (EC 3.6.4.13) (Activating signal cointegrator 1 complex subunit 3-like 1) (BRR2 homolog) (U5 snRNP-specific 200 kDa protein) (U5-200KD)	SNRNP200	2	28	16.3	244.5	0.94566	36.46	64	0.85374	24.477	64	362	1814
Q9Y3T9	Nucleolar complex protein 2 homolog (Protein NOC2 homolog) (NOC2-like protein) (Novel INHAT repressor)	NOC2L	1	4	6	84.918	0.81755	20.456	3	0.85389	54.555	3	3128	112042
Q9NQ50	39S ribosomal protein L40, mitochondrial (L40mt) (MRP-L40) (Mitochondrial large ribosomal subunit protein mL40) (Nuclear localization signal-containing protein deleted in velocardiofacial syndrome) (Up-regulated in metastasis)	MRPL40	1	4	30.1	24.49	0.70693	15.499	8	0.85392	17.498	8	2791	16613
K7EIN2	Tudor-interacting repair regulator protein (Fragment)	NUDT16L1	2	1	8.6	21.809	1.1083	3.1609	2	0.85407	4.5152	2	2566	205913
P07858	Cathepsin B (EC 3.4.22.1) (APP secretase) (APPS) (Cathepsin B1) [Cleaved into: Cathepsin B light chain; Cathepsin B heavy chain]	CTSB	12	9	27.1	37.821	0.94176	22.699	55	0.85422	18.69	55	593	32803
Q8N1F7	Nuclear pore complex protein Nup93 (93 kDa nucleoporin) (Nucleoporin Nup93)	NUP93	12	8	14.3	93.487	0.7899	16.255	7	0.85453	17.56	7	2153	35837
Q14126	Desmoglein-2 (Cadherin family member 5) (HDGC)	DSG2	1	7	13.6	122.29	0.87852	19.828	13	0.85491	24.672	13	1698	23594
P00387	NADH-cytochrome b5 reductase 3 (B5R) (Cytochrome b5 reductase) (EC 1.6.2.2) (Diaphorase-1) [Cleaved into: NADH-cytochrome b5 reductase 3 membrane-bound form; NADH-cytochrome b5 reductase 3 soluble form]	CYB5R3	2	7	27.2	34.234	0.98331	45.229	24	0.85492	29.659	24	483	17342
A0A1W2PPZ5	Transcription elongation factor A protein 1	TCEA1	13	9	33.9	33.935	0.93805	26.927	14	0.85505	19.663	14	841	86248
Q12996	Cleavage stimulation factor subunit 3 (CF-1 77 kDa subunit) (Cleavage stimulation factor 77 kDa subunit) (CSTF 77 kDa subunit) (CstF-77)	CSTF3	3	5	11.7	82.921	0.78373	29.987	2	0.85507	43.29	2	1607	58119
Q53HI1	Protein unc-50 homolog (Periodontal ligament-specific protein 22) (PDLs22) (Protein GMH1 homolog) (hGMH1) (Uncoordinated-like protein)	UNC50	2	1	7.7	30.372	0.57121	9.374	6	0.85549	16.02	6	1910	142043
H3BLU7	Aflatoxin B1 aldehyde reductase member 2 (Fragment)	AKR7A2	4	5	21.7	34.684	1.0495	47.16	16	0.85575	28.504	16	240	14660
Q07666	KH domain-containing, RNA-binding, signal transduction-associated protein 1 (GAP-associated tyrosine phosphoprotein p62) (Src-associated in mitosis 68 kDa protein) (Sam68) (p21 Ras GTPase-activating protein-associated p62) (p68)	KHDRBS1	2	6	15.6	48.227	0.90565	37.474	25	0.85579	22.007	25	1564	37740
O15400	Syntaxin-7	STX7	1	4	22.2	29.815	0.68704	17.208	5	0.85639	10.888	5	213	43850
Q9P0S9	Transmembrane protein 14C	TMEM14C	1	1	8.9	11.564	1.481	15.467	2	0.8564	24.769	2	2922	207017
Q96ST2	Protein IWS1 homolog (IWS1-like protein)	IWS1	2	2	4	91.954	0.94736	4.547	2	0.85653	0.42467	2	2492	31833
Q13363	C-terminal-binding protein 1 (CtBP1) (EC 1.1.1.-)	CTBP1	10	4	13.2	47.535	0.96488	24.655	4	0.85659	26.802	4	1642	23796
O75874	Isocitrate dehydrogenase [NADP] cytoplasmic (IDH) (EC 1.1.1.42) (Cytosolic NADP-isocitrate dehydrogenase) (IDP) (NADP(+)-specific ICDH) (Oxalosuccinate decarboxylase)	IDH1	4	22	61.4	46.659	1.1907	41.526	160	0.85678	30.956	160	372	22373
P53384	Cytosolic Fe-S cluster assembly factor NUBP1 (Nucleotide-binding protein 1) (NBP 1)	NUBP1	3	4	22.8	34.534	0.6251	14.23	3	0.85684	31.423	3	1247	50591
Q92896	Golgi apparatus protein 1 (CFR-1) (Cysteine-rich fibroblast growth factor receptor) (E-selectin ligand 1) (ESL-1) (Golgi sialoglycoprotein MG-160)	GLG1	3	10	14.2	134.55	0.9978	17.13	11	0.85684	27.74	11	2338	4840
C9JFR7	Cytochrome c (Fragment)	CYCS	3	7	57.4	11.333	0.98854	47.673	22	0.85695	34.181	22	1493	5074
E9PGM4	1,4-alpha-glucan branching enzyme (EC 2.4.1.18)	GBE1	2	4	8.5	75.959	1.1881	58.713	2	0.85699	37.325	2	1541	57534
Q6PUV4	Complexin-2 (Complexin II) (CPX II) (Synaphin-1)	CPLX2	1	2	17.9	15.394	0.6707	39.694	4	0.85735	7.3005	4	2009	11316
Q8NC51	Plasminogen activator inhibitor 1 RNA-binding protein (PAI1 RNA-binding protein 1) (PAI-RBP1) (SERPINE1 mRNA-binding protein 1)	SERBP1	1	13	36.8	44.965	1.2966	34.294	30	0.85765	25.047	30	2197	43722
H7C472	Beta-galactoside alpha-2,6-sialyltransferase 1 (Fragment)	ST6GAL1	2	1	9	20.047	0.77148	6.9836	2	0.85766	10.855	2	740	58616
O43395	U4/U6 small nuclear ribonucleoprotein Prp3 (Pre-mRNA-splicing factor 3) (hPrp3) (U4/U6 snRNP 90 kDa protein)	PRPF3	1	3	7.3	77.528	0.80876	34.284	2	0.85767	17.743	2	235	126022
J3QQZ9	Pyridoxal 5'-phosphate synthase (EC 1.4.3.5) (Fragment)	PNPO	4	5	29	27.312	1.0765	32.413	14	0.85788	26.092	14	2859	40479
O95232	Luc7-like protein 3 (Cisplatin resistance-associated-overexpressed protein) (Luc7A) (Okadaic acid-inducible phosphoprotein OA48-18) (cAMP regulatory element-associated protein 1) (CRE-associated protein 1) (CREAP-1)	LUC7L3	3	2	7.4	51.466	0.98141	15.715	5	0.85815	22.737	5	426	108532
Q08211	ATP-dependent RNA helicase A (EC 3.6.4.13) (DEAH box protein 9) (DExH-box helicase 9) (Leukophysin) (LKP) (Nuclear DNA helicase II) (NDH II) (RNA helicase A)	DHX9	1	31	32.8	140.96	0.94231	31.062	102	0.85816	32.914	102	1571	921
O60828	Polyglutamine-binding protein 1 (PQBP-1) (38 kDa nuclear protein containing a WW domain) (Npw38) (Polyglutamine tract-binding protein 1)	PQBP1	2	3	22.6	30.472	0.76324	15.816	2	0.85885	14.834	2	307	78315
P68036	Ubiquitin-conjugating enzyme E2 L3 (EC 2.3.2.23) (E2 ubiquitin-conjugating enzyme L3) (L-UBC) (UbcH7) (Ubiquitin carrier protein L3) (Ubiquitin-conjugating enzyme E2-F1) (Ubiquitin-protein ligase L3)	UBE2L3	2	3	27.3	17.861	1.0062	19.668	12	0.85891	18.553	12	1442	72804
Q9H9B4	Sideroflexin-1	SFXN1	5	10	37.6	35.619	0.92946	23.711	23	0.85892	20.467	23	2741	16898
P21399	Cytoplasmic aconitate hydratase (Aconitase) (EC 4.2.1.3) (Citrate hydro-lyase) (Ferritin repressor protein) (Iron regulatory protein 1) (IRP1) (Iron-responsive element-binding protein 1) (IRE-BP 1)	ACO1	1	7	12.9	98.398	0.93941	34.875	12	0.85901	35.715	12	817	24521
Q9UGP8	Translocation protein SEC63 homolog	SEC63	2	6	13.7	87.996	0.93458	13.375	12	0.85943	34.442	12	2963	18456
Q9NP92	39S ribosomal protein S30, mitochondrial (MRP-S30) (S30mt) (Mitochondrial large ribosomal subunit protein mL65) (Mitochondrial large ribosomal subunit protein mS30) (Programmed cell death protein 9)	MRPS30	1	2	11.8	50.364	0.72673	6.1877	4	0.85951	11.06	4	2781	158696
Q8NEZ5	F-box only protein 22 (F-box protein FBX22p44)	FBXO22	6	4	9.4	44.508	1.0696	49.47	3	0.85972	29.958	3	2219	101516
O00442	RNA 3'-terminal phosphate cyclase (RNA cyclase) (RNA-3'-phosphate cyclase) (EC 6.5.1.4) (RNA terminal phosphate cyclase domain-containing protein 1) (RTC domain-containing protein 1)	RTCA	2	3	12	39.336	1.4176	19.292	5	0.86001	16.364	5	131	7591
P36957	Dihydrolipoyllysine-residue succinyltransferase component of 2-oxoglutarate dehydrogenase complex, mitochondrial (EC 2.3.1.61) (2-oxoglutarate dehydrogenase complex component E2) (OGDC-E2) (Dihydrolipoamide succinyltransferase component of 2-oxoglutarate dehydrogenase complex) (E2K)	DLST	5	8	20.5	48.755	1.0525	42.825	15	0.86003	32.791	15	1025	12077
Q07955	Serine/arginine-rich splicing factor 1 (Alternative-splicing factor 1) (ASF-1) (Splicing factor, arginine/serine-rich 1) (pre-mRNA-splicing factor SF2, P33 subunit)	SRSF1	5	12	45.2	27.744	1.0937	52.743	37	0.86003	31.164	37	1568	32242
P49736	DNA replication licensing factor MCM2 (EC 3.6.4.12) (Minichromosome maintenance protein 2 homolog) (Nuclear protein BM28)	MCM2	3	10	15.3	101.89	0.95672	25.842	11	0.86005	17.927	12	1163	6671
Q9Y6G9	Cytoplasmic dynein 1 light intermediate chain 1 (LIC1) (Dynein light chain A) (DLC-A) (Dynein light intermediate chain 1, cytosolic)	DYNC1LI1	2	5	14.3	56.578	0.7796	9.2261	2	0.86035	4.8332	2	3188	5830
P52597	Heterogeneous nuclear ribonucleoprotein F (hnRNP F) (Nucleolin-like protein mcs94-1) [Cleaved into: Heterogeneous nuclear ribonucleoprotein F, N-terminally processed]	HNRNPF	2	12	40.5	45.671	0.94547	16.575	55	0.86042	19.214	55	1229	22701
F8VQX6	Methyltransferase-like protein 7A (Fragment)	METTL7A	3	3	23.3	20.662	0.98036	20.247	12	0.86045	20.558	12	2735	47032
Q96PZ0	Pseudouridylate synthase 7 homolog (EC 5.4.99.-)	PUS7	2	7	18.9	75.035	0.87354	17.97	9	0.86052	25.207	9	2479	48622
G3V576	Heterogeneous nuclear ribonucleoproteins C1/C2	HNRNPC	22	13	45.5	25.256	1.7009	69.474	51	0.86052	45.474	51	595	2797
Q14558	Phosphoribosyl pyrophosphate synthase-associated protein 1 (PRPP synthase-associated protein 1) (39 kDa phosphoribosypyrophosphate synthase-associated protein) (PAP39)	PRPSAP1	6	5	21.9	39.393	1.0231	33.638	8	0.86057	28.411	8	1728	117289
Q2NL82	Pre-rRNA-processing protein TSR1 homolog	TSR1	3	7	11.2	91.809	1.0748	37.659	7	0.86064	27.655	7	1881	21505
K7ELQ9	Transmembrane protein 205 (Fragment)	TMEM205	6	2	12.9	19.27	1.3291	54.905	2	0.86076	60.505	2	2014	79567
Q5T7C4	High mobility group protein B1	HMGB1	4	12	47.5	18.311	1.1181	36.46	54	0.86152	29.508	54	628	56571
B9A018	U4/U6.U5 tri-snRNP-associated protein 2	USP39	5	5	14	62.043	1.1902	14.569	4	0.86164	14.187	4	1907	16830
Q12906	Interleukin enhancer-binding factor 3 (Double-stranded RNA-binding protein 76) (DRBP76) (M-phase phosphoprotein 4) (MPP4) (Nuclear factor associated with dsRNA) (NFAR) (Nuclear factor of activated T-cells 90 kDa) (NF-AT-90) (Translational control protein 80) (TCP80)	ILF3	11	25	37.4	95.337	0.8915	28.287	109	0.86177	33.121	109	1600	6499
F5H4B6	Aldehyde dehydrogenase family 16 member A1	ALDH16A1	2	3	8	67.152	0.84461	47.321	4	0.86183	18.937	4	2146	26600
E2QRB9	Thioredoxin-disulfide reductase (EC 1.8.1.9)	TXNRD1	10	7	26.3	50.723	0.9621	50.159	4	0.86193	15.948	4	1875	27312
O94826	Mitochondrial import receptor subunit TOM70 (Mitochondrial precursor proteins import receptor) (Translocase of outer membrane 70 kDa subunit) (Translocase of outer mitochondrial membrane protein 70)	TOMM70	1	11	23	67.454	1.1534	14.28	18	0.8623	14.872	18	399	522
J3QL05	Serine/arginine-rich splicing factor 2 (Splicing component, 35 kDa) (Splicing factor SC35) (Splicing factor, arginine/serine-rich 2) (Fragment)	SRSF2	4	6	45.4	15.156	0.93129	19.585	26	0.86277	15.354	26	1510	28854
Q9HC38	Glyoxalase domain-containing protein 4	GLOD4	4	9	35.1	34.793	0.87166	19.172	48	0.86289	16.186	48	2757	14238
Q5T8U5	Surfeit locus protein 4	SURF4	3	2	15.1	21.127	1.043	12.627	29	0.86292	18.514	29	203	72682
E9PIU7	DNA-directed RNA polymerase II subunit RPB7	POLR2G	4	1	26.8	4.8055	0.96468	5.8171	2	0.86323	4.7806	2	1389	228392
Q9NX63	MICOS complex subunit MIC19 (Coiled-coil-helix-coiled-coil-helix domain-containing protein 3)	CHCHD3	4	3	15	26.152	0.9156	9.0899	3	0.86365	49.507	3	2878	128831
P35658	Nuclear pore complex protein Nup214 (214 kDa nucleoporin) (Nucleoporin Nup214) (Protein CAN)	NUP214	6	10	9.7	213.62	0.88449	20.182	4	0.86389	30.414	4	1009	2272
Q9NTX5	Ethylmalonyl-CoA decarboxylase (EC 4.1.1.94) (Enoyl-CoA hydratase domain-containing protein 1) (Methylmalonyl-CoA decarboxylase) (MMCD)	ECHDC1	9	3	19.2	33.698	0.71458	47.41	2	0.86403	15.228	2	2833	146273
P10768	S-formylglutathione hydrolase (FGH) (EC 3.1.2.12) (Esterase D) (Methylumbelliferyl-acetate deacetylase) (EC 3.1.1.56)	ESD	4	10	39.4	31.462	1.0131	18.459	17	0.86423	18.279	17	658	7524
P24666	Low molecular weight phosphotyrosine protein phosphatase (LMW-PTP) (LMW-PTPase) (EC 3.1.3.48) (Adipocyte acid phosphatase) (Low molecular weight cytosolic acid phosphatase) (EC 3.1.3.2) (Red cell acid phosphatase 1)	ACP1	4	6	39.2	18.042	0.97648	41.361	18	0.86429	61.924	18	861	12053
O75947	ATP synthase subunit d, mitochondrial (ATPase subunit d) (ATP synthase peripheral stalk subunit d)	ATP5PD	2	10	69.6	18.491	0.86056	21.644	17	0.86432	19.951	17	381	8894
Q02218	2-oxoglutarate dehydrogenase, mitochondrial (EC 1.2.4.2) (2-oxoglutarate dehydrogenase complex component E1) (OGDC-E1) (Alpha-ketoglutarate dehydrogenase)	OGDH	6	7	10.6	115.93	0.79888	24.94	4	0.86479	59.772	4	1521	35835
O75489	NADH dehydrogenase [ubiquinone] iron-sulfur protein 3, mitochondrial (EC 7.1.1.2) (Complex I-30kD) (CI-30kD) (NADH-ubiquinone oxidoreductase 30 kDa subunit)	NDUFS3	4	6	26.9	30.241	0.87228	22.579	20	0.86493	23.807	20	352	31246
P19404	NADH dehydrogenase [ubiquinone] flavoprotein 2, mitochondrial (EC 7.1.1.2) (NADH-ubiquinone oxidoreductase 24 kDa subunit)	NDUFV2	2	6	37.3	27.391	0.84963	42.491	22	0.86526	23.022	22	791	778
K7ER90	Eukaryotic translation initiation factor 3 subunit G (Fragment)	EIF3G	7	5	41	25.441	1.0755	40.614	7	0.86538	13.298	7	368	46537
Q9NR45	Sialic acid synthase (N-acetylneuraminate synthase) (EC 2.5.1.56) (N-acetylneuraminate-9-phosphate synthase) (EC 2.5.1.57) (N-acetylneuraminic acid phosphate synthase) (N-acetylneuraminic acid synthase)	NANS	3	7	23.7	40.307	0.86788	33.338	22	0.86554	21.753	22	2809	72952
P78347	General transcription factor II-I (GTFII-I) (TFII-I) (Bruton tyrosine kinase-associated protein 135) (BAP-135) (BTK-associated protein 135) (SRF-Phox1-interacting protein) (SPIN) (Williams-Beuren syndrome chromosomal region 6 protein)	GTF2I	2	13	18.8	112.42	0.89218	36.738	17	0.8659	47.775	17	1459	16849
Q9Y312	Protein AAR2 homolog (AAR2 splicing factor homolog)	AAR2	2	2	8.1	43.472	0.99229	24.63	3	0.86616	6.7893	3	3096	3571
P56537	Eukaryotic translation initiation factor 6 (eIF-6) (B(2)GCN homolog) (B4 integrin interactor) (CAB) (p27(BBP))	EIF6	6	9	60	26.599	0.86276	25.967	42	0.86672	24.82	42	1296	20541
O43815	Striatin	STRN	1	2	5.3	86.131	0.8692	1.0261	2	0.86679	1.5694	2	265	47098
A0A286YF37	F-box only protein 2 (Fragment)	FBXO2	3	6	29.5	30.299	0.95732	30.173	18	0.86711	34.815	18	2995	151446
P16152	Carbonyl reductase [NADPH] 1 (EC 1.1.1.184) (15-hydroxyprostaglandin dehydrogenase [NADP(+)]) (EC 1.1.1.196) (EC 1.1.1.197) (20-beta-hydroxysteroid dehydrogenase) (NADPH-dependent carbonyl reductase 1) (Prostaglandin 9-ketoreductase) (PG-9-KR) (Prostaglandin-E(2) 9-reductase) (EC 1.1.1.189) (Short chain dehydrogenase/reductase family 21C member 1)	CBR1	3	9	50.5	30.375	0.82734	29.33	30	0.86719	26.017	30	745	38685
P68371	Tubulin beta-4B chain (Tubulin beta-2 chain) (Tubulin beta-2C chain)	TUBB4B	12	23	51	49.83	0.91984	34.194	292	0.86721	33.931	292	1446	15476
A0A0D9SEI3	Cyclin-dependent kinase 11B	CDK11B	7	3	5.4	89.437	0.88148	10.246	4	0.86729	16.007	4	810	51181
Q14554	Protein disulfide-isomerase A5 (EC 5.3.4.1) (Protein disulfide isomerase-related protein)	PDIA5	3	7	18.5	59.594	0.86128	23.099	12	0.86742	22.246	12	1727	912
O43252	Bifunctional 3'-phosphoadenosine 5'-phosphosulfate synthase 1 (PAPS synthase 1) (PAPSS 1) (Sulfurylase kinase 1) (SK 1) (SK1) [Includes: Sulfate adenylyltransferase (EC 2.7.7.4) (ATP-sulfurylase) (Sulfate adenylate transferase) (SAT); Adenylyl-sulfate kinase (EC 2.7.1.25) (3'-phosphoadenosine-5'-phosphosulfate synthase) (APS kinase) (Adenosine-5'-phosphosulfate 3'-phosphotransferase) (Adenylylsul…	PAPSS1	2	7	17.1	70.832	0.93961	24.067	13	0.86746	40.42	13	229	23489
Q9BSC4	Nucleolar protein 10	NOL10	1	3	3.8	80.301	0.96358	14.514	3	0.86771	10.277	3	2577	120917
Q9Y4Z0	U6 snRNA-associated Sm-like protein LSm4 (Glycine-rich protein) (GRP)	LSM4	4	4	25.9	15.35	0.92455	42.42	12	0.86773	15.851	12	3148	95052
G3V1C3	Apoptosis inhibitor 5	API5	4	6	17.1	57.56	1.0311	18.845	10	0.86785	53.612	10	2655	29892
Q93099	Homogentisate 1,2-dioxygenase (EC 1.13.11.5) (Homogentisate oxygenase) (Homogentisic acid oxidase) (Homogentisicase)	HGD	5	10	35.7	49.963	0.93865	33.845	25	0.86848	26.157	25	2354	27662
P14373	Zinc finger protein RFP (EC 2.3.2.27) (RING finger protein 76) (RING-type E3 ubiquitin transferase TRIM27) (Ret finger protein) (Tripartite motif-containing protein 27)	TRIM27	2	2	4.3	58.489	0.95869	22.034	2	0.8686	11.069	2	713	47624
Q8NI22	Multiple coagulation factor deficiency protein 2 (Neural stem cell-derived neuronal survival protein)	MCFD2	1	1	11.6	16.39	1.3232	8.1437	4	0.86914	19.416	4	2227	30274
P09417	Dihydropteridine reductase (EC 1.5.1.34) (HDHPR) (Quinoid dihydropteridine reductase) (Short chain dehydrogenase/reductase family 33C member 1)	QDPR	4	10	57.4	25.789	0.75035	28.803	16	0.86958	19.661	16	627	1729
A0A087X0M4	Kanadaptin	SLC4A1AP	3	5	11.3	82.89	1.0621	65.668	6	0.86961	12.437	6	3206	4860
P68363	Tubulin alpha-1B chain (Alpha-tubulin ubiquitous) (Tubulin K-alpha-1) (Tubulin alpha-ubiquitous chain) [Cleaved into: Detyrosinated tubulin alpha-1B chain]	TUBA1B	2	19	53	50.151	0.95594	36.193	266	0.86973	32.119	266	1444	24226
Q7Z7H5	Transmembrane emp24 domain-containing protein 4 (Endoplasmic reticulum stress-response protein 25) (ERS25) (GMP25iso) (Putative NF-kappa-B-activating protein 156) (p24 family protein alpha-3) (p24alpha3)	TMED4	2	3	18.1	25.943	0.90587	7.7328	4	0.87022	14.062	4	2078	51830
A0A2R8Y425	DNA helicase (EC 3.6.4.12) (Fragment)	CHD4	32	14	11.5	215.49	1.1535	39.025	11	0.87056	34.52	11	1750	3614
P51003	Poly(A) polymerase alpha (PAP-alpha) (EC 2.7.7.19) (Polynucleotide adenylyltransferase alpha)	PAPOLA	11	5	11.3	82.842	1.0129	52.938	2	0.87082	8.3394	2	1198	49673
Q15102	Platelet-activating factor acetylhydrolase IB subunit gamma (EC 3.1.1.47) (PAF acetylhydrolase 29 kDa subunit) (PAF-AH 29 kDa subunit) (PAF-AH subunit gamma) (PAFAH subunit gamma)	PAFAH1B3	6	4	23.8	25.734	0.94378	15.708	7	0.87087	13.402	7	1779	13929
Q07960	Rho GTPase-activating protein 1 (CDC42 GTPase-activating protein) (GTPase-activating protein rhoGAP) (Rho-related small GTPase protein activator) (Rho-type GTPase-activating protein 1) (p50-RhoGAP)	ARHGAP1	2	3	11.6	50.435	0.68545	33.52	3	0.87115	29.476	3	1569	11222
O00186	Syntaxin-binding protein 3 (Platelet Sec1 protein) (PSP) (Protein unc-18 homolog 3) (Unc18-3) (Protein unc-18 homolog C) (Unc-18C)	STXBP3	1	1	1.5	67.764	0.65272	11.478	5	0.87129	11.764	5	111	212678
K7ENI6	TMEM256-PLSCR3 readthrough (NMD candidate)	TMEM256-PLSCR3	3	2	87.8	3.9694	0.90884	10.319	2	0.87137	26.004	2	2159	8990
A0A1W2PQV2	Glycine cleavage system H protein, mitochondrial (Fragment)	GCSH	3	2	30	10.999	0.95887	13.315	17	0.87137	11.81	17	851	144666
V9GYD0	ARL2-SNX15 readthrough (NMD candidate)	ARL2-SNX15	2	2	25.7	13.176	1.0866	35.364	2	0.87169	31.311	2	1014	58625
P28288	ATP-binding cassette sub-family D member 3 (70 kDa peroxisomal membrane protein) (PMP70)	ABCD3	1	5	9.9	75.475	0.82013	4.0414	6	0.8717	18.297	6	906	53978
Q9BRX8	Peroxiredoxin-like 2A (Peroxiredoxin-like 2 activated in M-CSF stimulated monocytes) (Protein PAMM) (Redox-regulatory protein FAM213A)	PRXL2A	1	4	21.4	25.764	1.4504	46.121	12	0.8719	30.638	12	2575	1825
Q92620	Pre-mRNA-splicing factor ATP-dependent RNA helicase PRP16 (EC 3.6.4.13) (ATP-dependent RNA helicase DHX38) (DEAH box protein 38)	DHX38	5	3	4	140.5	0.78968	13.416	2	0.87213	41.347	2	2314	64969
I3L1P8	Mitochondrial 2-oxoglutarate/malate carrier protein (Fragment)	SLC25A11	2	5	22	32.182	0.84484	40.56	11	0.87213	43.695	11	1532	2707
Q9P287	BRCA2 and CDKN1A-interacting protein (P21- and CDK-associated protein 1) (Protein TOK-1)	BCCIP	1	8	39.2	35.979	1.1288	27.718	17	0.87246	23.082	17	2929	18508
Q9H488	GDP-fucose protein O-fucosyltransferase 1 (EC 2.4.1.221) (Peptide-O-fucosyltransferase 1) (O-FucT-1)	POFUT1	1	4	18	43.955	0.96115	15.328	8	0.87257	15.563	8	2713	32203
P51688	N-sulphoglucosamine sulphohydrolase (EC 3.10.1.1) (Sulfoglucosamine sulfamidase) (Sulphamidase)	SGSH	5	5	11.4	56.695	0.93008	8.0921	5	0.87259	18.887	5	1215	5005
P61964	WD repeat-containing protein 5 (BMP2-induced 3-kb gene protein)	WDR5	3	5	19.2	36.588	0.74947	8.2639	4	0.87273	11.978	4	1360	60442
Q9UMS4	Pre-mRNA-processing factor 19 (EC 2.3.2.27) (Nuclear matrix protein 200) (PRP19/PSO4 homolog) (hPso4) (RING-type E3 ubiquitin transferase PRP19) (Senescence evasion factor)	PRPF19	5	14	45.6	55.18	0.99591	37.976	35	0.87276	23.585	34	3028	23748
P52209	6-phosphogluconate dehydrogenase, decarboxylating (EC 1.1.1.44)	PGD	5	16	38.7	53.139	1.0904	29.404	49	0.87276	23.486	49	1222	9177
Q92615	La-related protein 4B (La ribonucleoprotein domain family member 4B) (La ribonucleoprotein domain family member 5) (La-related protein 5)	LARP4B	3	4	8.4	80.551	0.84171	37.598	3	0.87286	101.37	3	2312	10264
C9JJV6	Myeloid-associated differentiation marker (Fragment)	MYADM	5	1	15.8	15.864	1.0251	20.94	2	0.87287	16.599	2	2489	193658
P78344	Eukaryotic translation initiation factor 4 gamma 2 (eIF-4-gamma 2) (eIF-4G 2) (eIF4G 2) (Death-associated protein 5) (DAP-5) (p97)	EIF4G2	6	8	16.4	102.36	1.0483	26.535	6	0.87294	12.76	6	1456	34191
A0A087WT99	Ester hydrolase C11orf54	C11orf54	11	4	18.4	28.683	0.84056	22.793	12	0.87349	21.552	12	2685	18134
Q06830	Peroxiredoxin-1 (EC 1.11.1.24) (Natural killer cell-enhancing factor A) (NKEF-A) (Proliferation-associated gene protein) (PAG) (Thioredoxin peroxidase 2) (Thioredoxin-dependent peroxide reductase 2) (Thioredoxin-dependent peroxiredoxin 1)	PRDX1	3	18	76.9	22.11	0.93067	42.537	238	0.87363	26.71	238	1560	4507
A0A087WYS1	UTP--glucose-1-phosphate uridylyltransferase (EC 2.7.7.9)	UGP2	5	14	34.8	56.967	0.72458	21.954	43	0.87369	17.363	43	1872	16677
Q08257	Quinone oxidoreductase (EC 1.6.5.5) (NADPH:quinone reductase) (Zeta-crystallin)	CRYZ	3	14	57.1	35.206	0.94617	28.212	50	0.87378	29.965	50	1572	8014
A0A0B4J1Z1	Serine/arginine-rich-splicing factor 7 (Splicing factor, arginine/serine-rich 7, 35kDa, isoform CRA_a)	SRSF7	4	7	46.7	15.763	1.1318	50.733	11	0.8743	26.313	11	1855	7562
P82663	28S ribosomal protein S25, mitochondrial (MRP-S25) (S25mt) (Mitochondrial small ribosomal subunit protein mS25)	MRPS25	2	4	30.6	20.116	0.77	8.0171	3	0.87432	17.296	3	1473	42211
P13995	Bifunctional methylenetetrahydrofolate dehydrogenase/cyclohydrolase, mitochondrial [Includes: NAD-dependent methylenetetrahydrofolate dehydrogenase (EC 1.5.1.15); Methenyltetrahydrofolate cyclohydrolase (EC 3.5.4.9)]	MTHFD2	3	3	15.7	37.895	1.0691	15.861	6	0.87438	13.943	6	710	82117
P16989	Y-box-binding protein 3 (Cold shock domain-containing protein A) (DNA-binding protein A) (Single-strand DNA-binding protein NF-GMB)	YBX3	2	11	52.4	40.089	1.3038	30.112	12	0.87463	41.936	12	757	42789
A0A0B4J2E5	Uncharacterized protein	LOC102724159	2	2	3.2	102.45	0.88682	1.4312	2	0.87473	3.4655	2	1789	9296
P46087	Probable 28S rRNA (cytosine(4447)-C(5))-methyltransferase (EC 2.1.1.-) (Nucleolar protein 1) (Nucleolar protein 2 homolog) (Proliferating-cell nucleolar antigen p120) (Proliferation-associated nucleolar protein p120)	NOP2	5	15	24.6	89.301	0.88481	39.158	31	0.87496	26.787	31	1102	33755
P60602	Reactive oxygen species modulator 1 (ROS modulator 1) (Epididymis tissue protein Li 175) (Glyrichin) (Mitochondrial targeting GxxxG motif protein) (MTGM) (Protein MGR2 homolog)	ROMO1	1	1	21.5	8.1828	1.0888	15.791	8	0.87499	10.275	8	1310	155943
Q13057	Bifunctional coenzyme A synthase (CoA synthase) (NBP) (POV-2) [Includes: Phosphopantetheine adenylyltransferase (EC 2.7.7.3) (Dephospho-CoA pyrophosphorylase) (Pantetheine-phosphate adenylyltransferase) (PPAT); Dephospho-CoA kinase (DPCK) (EC 2.7.1.24) (Dephosphocoenzyme A kinase) (DPCOAK)]	COASY	6	7	15.4	62.328	1.2922	46.229	11	0.87516	46.505	11	1613	26598
Q96FJ2	Dynein light chain 2, cytoplasmic (8 kDa dynein light chain b) (DLC8b) (Dynein light chain LC8-type 2)	DYNLL2	1	3	44.9	10.35	0.74306	24.01	11	0.87536	12.292	11	2413	32452
D6RH17	Alcohol dehydrogenase 6 (Fragment)	ADH6	4	3	14.4	26.515	1.0688	27.963	4	0.87563	22.712	4	908	19058
P61978	Heterogeneous nuclear ribonucleoprotein K (hnRNP K) (Transformation up-regulated nuclear protein) (TUNP)	HNRNPK	4	22	57.7	50.976	1.0001	32.581	101	0.87585	31.824	101	1362	14887
Q9Y285	Phenylalanine--tRNA ligase alpha subunit (EC 6.1.1.20) (CML33) (Phenylalanyl-tRNA synthetase alpha subunit) (PheRS)	FARSA	6	7	19.5	57.563	1.0205	17.334	18	0.87641	33.564	18	3069	4714
I3L3B4	VKc domain-containing protein (Fragment)	0	4	1	12.5	11.082	1.0987	16.376	4	0.87648	31.007	4	2556	12785
Q8NCN5	Pyruvate dehydrogenase phosphatase regulatory subunit, mitochondrial (PDPr)	PDPR	4	5	7.5	99.363	0.69448	23.014	4	0.87653	46.392	4	2204	53633
B4E107	Arginyl-tRNA--protein transferase 1 (Arginyltransferase 1) (R-transferase 1) (EC 2.3.2.8) (Arginine-tRNA--protein transferase 1)	ATE1	6	4	14.7	47.834	0.98842	29.751	3	0.87663	31.21	3	3227	37084
C9JBI3	O-phosphoserine phosphohydrolase (EC 3.1.3.3) (Phosphoserine phosphatase) (Fragment)	PSPH	5	8	46	20.745	0.99261	28.561	26	0.87689	32.168	26	1455	16521
S4R3H4	Apoptotic chromatin condensation inducer in the nucleus	ACIN1	3	8	12.7	145.44	0.8236	24.603	16	0.87704	24.072	16	3284	2228
A0A2R8Y5A0	Casein kinase II subunit alpha	CSNK2A1	22	4	14.4	40.717	0.93723	18.42	11	0.87706	26.76	11	1447	58517
A0A0A0MSW4	Phosphatidylinositol transfer protein beta isoform	PITPNB	6	5	24	31.581	0.77288	35.419	3	0.87717	11.33	3	1140	4470
Q9UNZ2	NSFL1 cofactor p47 (UBX domain-containing protein 2C) (p97 cofactor p47)	NSFL1C	2	8	30.8	40.572	0.88856	14.862	24	0.87718	42.227	24	3043	21624
P29992	Guanine nucleotide-binding protein subunit alpha-11 (G alpha-11) (G-protein subunit alpha-11) (Guanine nucleotide-binding protein G(y) subunit alpha)	GNA11	5	2	7.2	42.123	0.86925	22.424	5	0.87818	29.271	5	922	81487
Q15785	Mitochondrial import receptor subunit TOM34 (hTom34) (Translocase of outer membrane 34 kDa subunit)	TOMM34	1	5	27.8	34.559	0.73474	8.2843	7	0.87834	16.142	7	1829	118993
A0A1C7CYZ1	Mitogen-activated protein kinase 15 (Fragment)	MAPK15	2	1	2.9	30.955	1.0071	5.2079	5	0.87862	13.739	5	2246	110414
Q13423	NAD(P) transhydrogenase, mitochondrial (EC 7.1.1.1) (Nicotinamide nucleotide transhydrogenase) (Pyridine nucleotide transhydrogenase)	NNT	6	13	16.5	113.89	0.79518	37.098	31	0.87867	29.758	31	1647	18170
A5YKK6	CCR4-NOT transcription complex subunit 1 (CCR4-associated factor 1) (Negative regulator of transcription subunit 1 homolog) (NOT1H) (hNOT1)	CNOT1	2	7	4	266.94	0.95362	24.26	6	0.87872	55.014	6	87	29353
Q9UMY1	Nucleolar protein 7 (Nucleolar protein of 27 kDa)	NOL7	1	3	15.6	29.426	1.0191	23.892	8	0.87897	21.813	8	3030	3570
G5E9S8	Kinesin light chain	KLC1	12	2	4.7	62.506	1.0802	15.523	4	0.87901	17.787	4	1566	28686
A0A3B3IUA2	Ribonucloprotein	SNU13	5	7	25	30.162	0.9993	39.525	29	0.87924	28.829	29	3220	4124
Q92621	Nuclear pore complex protein Nup205 (205 kDa nucleoporin) (Nucleoporin Nup205)	NUP205	2	7	4.8	227.92	0.7884	21.305	9	0.87935	33.207	9	2315	28158
E7EWC2	Ras GTPase-activating-like protein IQGAP2 (Fragment)	IQGAP2	8	25	25.5	160.33	1.061	23.606	49	0.87987	26.358	49	1671	16463
F5H6E2	Unconventional myosin-Ic	MYO1C	5	8	12.3	118.99	0.58089	47.054	11	0.88015	25.792	10	107	32258
B1AKM8	Phosphatidylserine decarboxylase proenzyme, mitochondrial (Fragment)	PISD	4	2	10.1	26.282	0.91104	11.787	5	0.88058	16.625	5	2961	92083
O60218	Aldo-keto reductase family 1 member B10 (EC 1.1.1.300) (EC 1.1.1.54) (ARL-1) (Aldose reductase-like) (Aldose reductase-related protein) (ARP) (hARP) (Small intestine reductase) (SI reductase)	AKR1B10	1	16	57.3	36.019	1.6051	18.872	57	0.88081	29.672	57	275	12075
E5RIW3	Tubulin-specific chaperone A	TBCA	5	5	51.2	10.08	0.91775	22.337	15	0.88103	25.344	15	333	90973
Q9P0Z9	Peroxisomal sarcosine oxidase (PSO) (EC 1.5.3.1) (EC 1.5.3.7) (L-pipecolate oxidase) (L-pipecolic acid oxidase)	PIPOX	3	2	6.9	44.065	0.92042	9.7382	2	0.88119	2.742	2	2924	181571
Q9BTV4	Transmembrane protein 43 (Protein LUMA)	TMEM43	1	3	13	44.875	0.87775	20.9	8	0.88137	16.252	7	2595	122879
P56192	Methionine--tRNA ligase, cytoplasmic (EC 6.1.1.10) (Methionyl-tRNA synthetase) (MetRS)	MARS1	13	16	24.1	101.11	1.1399	36.257	38	0.88142	23.045	38	1293	15177
Q9NPD3	Exosome complex component RRP41 (Exosome component 4) (Ribosomal RNA-processing protein 41) (p12A)	EXOSC4	3	2	11.8	26.383	0.89233	5.0048	6	0.8817	9.7736	6	2785	8554
I3L159	Heme oxygenase (biliverdin-producing) (EC 1.14.14.18) (Fragment)	HMOX2	9	4	23.1	26.578	0.80033	12.362	8	0.88178	35.395	8	942	126374
Q9NTK5	Obg-like ATPase 1 (DNA damage-regulated overexpressed in cancer 45) (DOC45) (GTP-binding protein 9)	OLA1	4	10	34.6	44.743	0.9464	30.882	24	0.88247	44.154	24	2832	6923
Q00610	Clathrin heavy chain 1 (Clathrin heavy chain on chromosome 17) (CLH-17)	CLTC	10	38	26.1	191.61	0.96977	29.186	162	0.88255	31.424	161	1502	4440
O95747	Serine/threonine-protein kinase OSR1 (EC 2.7.11.1) (Oxidative stress-responsive 1 protein)	OXSR1	2	2	5.1	58.022	1.2422	22.457	8	0.8826	14.084	8	455	38007
Q6YN16	Hydroxysteroid dehydrogenase-like protein 2 (EC 1.-.-.-) (Short chain dehydrogenase/reductase family 13C member 1)	HSDL2	1	7	23.7	45.394	1.0018	22.509	18	0.88271	21.851	18	2023	14566
M0R208	ATP-dependent Clp protease proteolytic subunit (EC 3.4.21.92)	CLPP	3	5	45.8	20.568	1.041	19.643	2	0.88287	20.532	2	1864	72291
O95831	Apoptosis-inducing factor 1, mitochondrial (EC 1.6.99.-) (Programmed cell death protein 8)	AIFM1	2	13	26.1	66.9	0.97307	37.663	37	0.883	18.471	37	464	13810
C9IZY8	Formin-like protein 2	FMNL2	4	2	5.2	53.383	1.1478	15.558	2	0.88387	39.433	2	2478	81211
P18583	Protein SON (Bax antagonist selected in saccharomyces 1) (BASS1) (Negative regulatory element-binding protein) (NRE-binding protein) (Protein DBP-5) (SON3)	SON	3	10	8	263.83	1.4816	40.189	6	0.88387	15.5	6	779	7047
Q9H773	dCTP pyrophosphatase 1 (EC 3.6.1.12) (Deoxycytidine-triphosphatase 1) (dCTPase 1) (RS21C6) (XTP3-transactivated gene A protein)	DCTPP1	3	3	31.8	18.681	0.94939	8.3483	6	0.88424	6.7612	6	2729	59967
H0YDD4	Acetyltransferase component of pyruvate dehydrogenase complex (EC 2.3.1.12) (Fragment)	DLAT	3	12	34.7	51.201	0.95044	35.37	55	0.88508	24.838	55	651	32591
Q9Y248	DNA replication complex GINS protein PSF2 (GINS complex subunit 2)	GINS2	1	1	6.5	21.427	0.95313	16.591	2	0.88544	9.3621	2	3060	137530
G3V279	Enhancer of rudimentary homolog	ERH	2	3	46.5	8.2033	1.2202	81.259	32	0.88552	22.736	32	1488	168385
R4GNH3	26S proteasome regulatory subunit 6A	PSMC3	5	15	43.7	47.352	0.93332	22.568	45	0.88639	22.032	45	3283	16474
P09960	Leukotriene A-4 hydrolase (LTA-4 hydrolase) (EC 3.3.2.6) (Leukotriene A(4) hydrolase)	LTA4H	2	16	33.1	69.284	0.95297	31.302	42	0.88648	37.696	42	638	10988
Q9NV31	U3 small nucleolar ribonucleoprotein protein IMP3 (U3 snoRNP protein IMP3) (BRMS2)	IMP3	1	1	8.2	21.85	0.78697	4.423	4	0.88659	11.481	4	2851	206558
A0A0A0MTB8	WD repeat-containing protein 36	WDR36	2	9	16	99.365	0.8948	33.993	8	0.887	38.539	8	2229	50392
O60725	Protein-S-isoprenylcysteine O-methyltransferase (EC 2.1.1.100) (Isoprenylcysteine carboxylmethyltransferase) (Prenylated protein carboxyl methyltransferase) (PPMT) (Prenylcysteine carboxyl methyltransferase) (pcCMT)	ICMT	1	2	9.5	31.938	0.79342	19.076	2	0.88733	13	2	298	2082
Q9BRF8	Serine/threonine-protein phosphatase CPPED1 (EC 3.1.3.16) (Calcineurin-like phosphoesterase domain-containing protein 1) (Complete S-transactivated protein 1)	CPPED1	1	8	37.6	35.548	0.87492	42.586	32	0.88733	43.983	31	2563	11328
P46926	Glucosamine-6-phosphate isomerase 1 (EC 3.5.99.6) (Glucosamine-6-phosphate deaminase 1) (GNPDA 1) (GlcN6P deaminase 1) (Oscillin)	GNPDA1	7	5	20.8	32.668	1.0689	15.442	10	0.88737	23.063	10	1116	89010
P56385	ATP synthase subunit e, mitochondrial (ATPase subunit e) (ATP synthase membrane subunit e) [Cleaved into: ATP synthase subunit e, mitochondrial, N-terminally processed]	ATP5ME	1	3	31.9	7.9331	1.1203	20.487	5	0.88793	24.304	5	1295	46454
Q92900	Regulator of nonsense transcripts 1 (EC 3.6.4.-) (ATP-dependent helicase RENT1) (Nonsense mRNA reducing factor 1) (NORF1) (Up-frameshift suppressor 1 homolog) (hUpf1)	UPF1	1	15	20.8	124.34	0.90921	24.563	18	0.88811	34.363	18	2339	7801
Q9Y446	Plakophilin-3	PKP3	6	4	7.5	87.081	0.63565	27.785	2	0.88846	32.688	2	3132	79805
G5EA31	Protein transport protein Sec24C (SEC24 related gene family, member C (S. cerevisiae), isoform CRA_b)	SEC24C	3	13	19.4	111.98	1.0312	28.338	35	0.8885	30.523	35	1261	50941
Q8N8A6	ATP-dependent RNA helicase DDX51 (EC 3.6.4.13) (DEAD box protein 51)	DDX51	1	4	11.3	72.456	0.79718	16.046	2	0.88858	6.9693	2	2181	114447
Q9NQT5	Exosome complex component RRP40 (Exosome component 3) (Ribosomal RNA-processing protein 40) (p10)	EXOSC3	1	3	13.5	29.572	0.82112	7.9505	2	0.88894	18.103	2	2801	6452
H0YJS4	Eukaryotic translation initiation factor 2 subunit 1 (Eukaryotic translation initiation factor 2 subunit alpha) (Fragment)	EIF2S1	3	7	32.5	28.865	0.95863	26.526	7	0.8891	20.209	7	552	4835
Q7L014	Probable ATP-dependent RNA helicase DDX46 (EC 3.6.4.13) (DEAD box protein 46) (PRP5 homolog)	DDX46	3	12	16.8	117.36	1.1261	33.194	14	0.88967	34.83	14	2037	35652
Q96H79	Zinc finger CCCH-type antiviral protein 1-like	ZC3HAV1L	1	3	14	32.962	1.1071	19.745	3	0.88979	19.356	3	2431	6523
E7ETU9	Procollagen-lysine 5-dioxygenase (EC 1.14.11.4)	PLOD2	3	9	17.8	81.169	0.67376	27.705	10	0.88987	17.641	10	134	84860
P36871	Phosphoglucomutase-1 (PGM 1) (EC 5.4.2.2) (Glucose phosphomutase 1)	PGM1	2	17	37.4	61.448	1.3955	35.894	39	0.89015	27.356	39	1021	5313
O43670	BUB3-interacting and GLEBS motif-containing protein ZNF207 (BuGZ) (hBuGZ) (Zinc finger protein 207)	ZNF207	9	4	11.1	50.75	1.1737	39.493	7	0.89016	32.822	7	248	51032
P26599	Polypyrimidine tract-binding protein 1 (PTB) (57 kDa RNA-binding protein PPTB-1) (Heterogeneous nuclear ribonucleoprotein I) (hnRNP I)	PTBP1	12	21	54.6	57.221	1.1157	39.788	105	0.8902	28.652	105	882	39987
P55263	Adenosine kinase (AK) (EC 2.7.1.20) (Adenosine 5'-phosphotransferase)	ADK	1	5	15.2	40.545	0.91063	46.404	20	0.89025	16.282	20	1284	30529
Q7Z434	Mitochondrial antiviral-signaling protein (MAVS) (CARD adapter inducing interferon beta) (Cardif) (Interferon beta promoter stimulator protein 1) (IPS-1) (Putative NF-kappa-B-activating protein 031N) (Virus-induced-signaling adapter) (VISA)	MAVS	1	16	54.6	56.527	0.97406	40.348	8	0.89037	25.121	8	2064	8928
A0A087WU03	Heterogeneous nuclear ribonucleoprotein D-like	HNRNPDL	1	1	31.6	6.7215	0.80707	12.242	11	0.89051	11.749	11	3202	138653
Q96FW1	Ubiquitin thioesterase OTUB1 (EC 3.4.19.12) (Deubiquitinating enzyme OTUB1) (OTU domain-containing ubiquitin aldehyde-binding protein 1) (Otubain-1) (hOTU1) (Ubiquitin-specific-processing protease OTUB1)	OTUB1	6	8	37.3	31.284	0.78141	49.6	20	0.89055	27.269	19	2416	923
Q16778	Histone H2B type 2-E (H2B-clustered histone 21) (Histone H2B-GL105) (Histone H2B.q) (H2B/q)	H2BC21	7	10	61.1	13.92	1.4034	18.576	6	0.89067	24.599	6	577	16554
P02749	Beta-2-glycoprotein 1 (APC inhibitor) (Activated protein C-binding protein) (Anticardiolipin cofactor) (Apolipoprotein H) (Apo-H) (Beta-2-glycoprotein I) (B2GPI) (Beta(2)GPI)	APOH	4	5	26.1	38.298	1.2615	23.611	10	0.8907	17.588	10	515	22815
O43390	Heterogeneous nuclear ribonucleoprotein R (hnRNP R)	HNRNPR	3	15	26.7	70.942	0.99238	35.771	80	0.89078	29.334	80	234	9078
Q99613	Eukaryotic translation initiation factor 3 subunit C (eIF3c) (Eukaryotic translation initiation factor 3 subunit 8) (eIF3 p110)	EIF3C	3	8	9.6	105.34	1.1768	29.627	9	0.89112	27.437	9	98	47535
Q12907	Vesicular integral-membrane protein VIP36 (Glycoprotein GP36b) (Lectin mannose-binding 2) (Vesicular integral-membrane protein 36) (VIP36)	LMAN2	5	6	19.7	40.228	0.86627	24.66	21	0.89116	27.285	21	1601	36770
Q2Q1W2	E3 ubiquitin-protein ligase TRIM71 (EC 2.3.2.27) (Protein lin-41 homolog) (RING-type E3 ubiquitin transferase TRIM71) (Tripartite motif-containing protein 71)	TRIM71	1	4	7.9	93.384	1.0732	16.645	3	0.89124	34.335	3	1882	57234
P30837	Aldehyde dehydrogenase X, mitochondrial (EC 1.2.1.3) (Aldehyde dehydrogenase 5) (Aldehyde dehydrogenase family 1 member B1)	ALDH1B1	1	14	28.8	57.206	0.92699	23.13	78	0.8915	29.161	78	950	43425
E9PG35	Methylcrotonoyl-CoA carboxylase subunit alpha, mitochondrial (Fragment)	MCCC1	5	4	12.5	66.467	1.2764	5.9095	2	0.89172	13.504	2	2485	50431
P34897	Serine hydroxymethyltransferase, mitochondrial (SHMT) (EC 2.1.2.1) (Glycine hydroxymethyltransferase) (Serine methylase)	SHMT2	13	14	30.4	55.992	1.094	29.029	50	0.89185	21.761	50	984	1752
Q92917	G-patch domain and KOW motifs-containing protein (G-patch domain-containing protein 5) (Protein MOS2 homolog) (Protein T54)	GPKOW	1	4	17	52.228	0.75997	10.615	3	0.89204	7.0627	3	2340	6725
P40925	Malate dehydrogenase, cytoplasmic (EC 1.1.1.37) (Cytosolic malate dehydrogenase) (Diiodophenylpyruvate reductase) (EC 1.1.1.96)	MDH1	5	12	38.3	36.426	0.97573	19.141	53	0.89215	33.516	53	1055	48348
Q9Y3B4	Splicing factor 3B subunit 6 (Pre-mRNA branch site protein p14) (SF3b 14 kDa subunit) (SF3B14a) (Spliceosome-associated protein, 14-kDa) (Splicing factor 3b, subunit 6, 14kDa)	SF3B6	1	1	9.6	14.585	1.006	12.125	3	0.89223	13.479	3	3111	98523
P13010	X-ray repair cross-complementing protein 5 (EC 3.6.4.-) (86 kDa subunit of Ku antigen) (ATP-dependent DNA helicase 2 subunit 2) (ATP-dependent DNA helicase II 80 kDa subunit) (CTC box-binding factor 85 kDa subunit) (CTC85) (CTCBF) (DNA repair protein XRCC5) (Ku80) (Ku86) (Lupus Ku autoantigen protein p86) (Nuclear factor IV) (Thyroid-lupus autoantigen) (TLAA) (X-ray repair complementing defective…	XRCC5	3	28	40.6	82.704	1.0354	35.953	92	0.89225	26.041	92	694	7492
Q15393	Splicing factor 3B subunit 3 (Pre-mRNA-splicing factor SF3b 130 kDa subunit) (SF3b130) (STAF130) (Spliceosome-associated protein 130) (SAP 130)	SF3B3	3	19	19.3	135.58	1.047	45.423	47	0.89232	36.761	47	1805	8949
P47756	F-actin-capping protein subunit beta (CapZ beta)	CAPZB	2	8	36.1	31.35	0.86412	7.7252	11	0.89294	12.652	11	1124	40047
Q9NR30	Nucleolar RNA helicase 2 (EC 3.6.4.13) (DEAD box protein 21) (Gu-alpha) (Nucleolar RNA helicase Gu) (Nucleolar RNA helicase II) (RH II/Gu)	DDX21	1	18	29.2	87.343	1.1339	34.614	47	0.89296	27.857	47	2807	3114
E5RGN3	Copper transport protein ATOX1	ATOX1	3	2	30.5	6.3304	0.85259	48.201	4	0.8933	44.339	4	118	200693
A0A2R8YGD1	Tripeptidyl aminopeptidase (EC 3.4.14.9) (Tripeptidyl-peptidase 1) (Tripeptidyl-peptidase I)	TPP1	6	3	8.9	50.889	1.0267	19.873	10	0.89332	45.974	10	165	92469
P06576	ATP synthase subunit beta, mitochondrial (EC 7.1.2.2) (ATP synthase F1 subunit beta)	ATP5F1B	5	22	52.2	56.559	0.96421	43.847	288	0.89346	21.714	287	568	2336
E5RHG8	Elongin-C (Fragment)	ELOC	3	3	51.7	9.9601	0.74833	17.311	14	0.89355	15.51	14	1801	16647
Q9BRA2	Thioredoxin domain-containing protein 17 (14 kDa thioredoxin-related protein) (TRP14) (Protein 42-9-9) (Thioredoxin-like protein 5)	TXNDC17	4	3	26.8	13.941	0.88863	17.368	10	0.89357	17.813	10	2562	178906
Q15019	Septin-2 (Neural precursor cell expressed developmentally down-regulated protein 5) (NEDD-5)	SEPTIN2	18	7	26.9	41.487	0.98494	30.511	20	0.89359	14.99	20	1763	10915
C9J880	Glycosyltransferase 8 domain-containing protein 1 (Fragment)	GLT8D1	5	4	36.2	19.42	0.83412	35.164	4	0.89417	16.952	4	1964	62767
P47897	Glutamine--tRNA ligase (EC 6.1.1.18) (Glutaminyl-tRNA synthetase) (GlnRS)	QARS1	21	17	27.9	87.798	0.99957	45.625	45	0.89419	36.746	45	1125	11207
P11766	Alcohol dehydrogenase class-3 (EC 1.1.1.1) (Alcohol dehydrogenase 5) (Alcohol dehydrogenase class chi chain) (Alcohol dehydrogenase class-III) (Glutathione-dependent formaldehyde dehydrogenase) (FALDH) (FDH) (GSH-FDH) (EC 1.1.1.-) (S-(hydroxymethyl)glutathione dehydrogenase) (EC 1.1.1.284)	ADH5	5	11	30.2	39.724	1.075	48.637	39	0.89432	27.934	39	680	2855
Q52LJ0	Protein FAM98B	FAM98B	1	3	11.2	37.19	1.0163	31.489	8	0.8946	22.759	8	1901	94438
Q14498	RNA-binding protein 39 (CAPER alpha) (CAPERalpha) (Hepatocellular carcinoma protein 1) (RNA-binding motif protein 39) (RNA-binding region-containing protein 2) (Splicing factor HCC1)	RBM39	12	9	21.5	59.379	0.99309	16.9	31	0.89461	22.164	31	1725	562
P06733	Alpha-enolase (EC 4.2.1.11) (2-phospho-D-glycerate hydro-lyase) (C-myc promoter-binding protein) (Enolase 1) (MBP-1) (MPB-1) (Non-neural enolase) (NNE) (Phosphopyruvate hydratase) (Plasminogen-binding protein)	ENO1	11	34	72.1	47.168	0.8262	45.324	373	0.89471	25.597	373	571	3492
F8W1A4	Adenylate kinase 2, mitochondrial (AK 2) (EC 2.7.4.3) (ATP-AMP transphosphorylase 2) (ATP:AMP phosphotransferase) (Adenylate monophosphate kinase)	AK2	6	7	40.1	25.63	0.74391	22.881	31	0.89543	31.086	31	1272	16748
A0A140T9L0	WD repeat-containing protein 46 (Fragment)	WDR46	4	4	25.5	35.759	0.92224	20.427	4	0.89582	12.395	4	3211	24124
F8WEG8	Interferon-inducible double-stranded RNA-dependent protein kinase activator A	PRKRA	4	3	42.1	10.414	0.97106	22.046	5	0.89584	41.687	5	358	164872
Q75MG1	Basic leucine zipper and W2 domain-containing protein 2 (Fragment)	BZW2	10	2	10.2	31.247	0.93792	8.4767	3	0.896	6.598	3	3186	38085
H3BPK3	Hydroxyacylglutathione hydrolase, mitochondrial (Fragment)	HAGH	5	4	22.6	26.305	1.0025	21.979	7	0.89612	20.87	7	1867	79814
Q15233	Non-POU domain-containing octamer-binding protein (NonO protein) (54 kDa nuclear RNA- and DNA-binding protein) (55 kDa nuclear protein) (DNA-binding p52/p100 complex, 52 kDa subunit) (NMT55) (p54(nrb)) (p54nrb)	NONO	5	19	48	54.231	0.91451	50.152	99	0.8965	29.784	100	1787	2252
P35580	Myosin-10 (Cellular myosin heavy chain, type B) (Myosin heavy chain 10) (Myosin heavy chain, non-muscle IIb) (Non-muscle myosin heavy chain B) (NMMHC-B) (Non-muscle myosin heavy chain IIb) (NMMHC II-b) (NMMHC-IIB)	MYH10	4	41	27.2	229	0.86573	40.938	99	0.89661	23.756	99	1004	5258
O75746	Calcium-binding mitochondrial carrier protein Aralar1 (Mitochondrial aspartate glutamate carrier 1) (Solute carrier family 25 member 12)	SLC25A12	1	5	7.8	74.761	0.70119	22.609	2	0.89679	23.543	2	365	9220
O95168	NADH dehydrogenase [ubiquinone] 1 beta subcomplex subunit 4 (Complex I-B15) (CI-B15) (NADH-ubiquinone oxidoreductase B15 subunit)	NDUFB4	3	3	31.8	15.208	0.95016	19.151	6	0.89712	32.549	6	420	69770
Q9NYF8	Bcl-2-associated transcription factor 1 (Btf) (BCLAF1 and THRAP3 family member 1)	BCLAF1	9	7	8.3	106.12	1.055	31.041	13	0.89721	26.795	13	2892	43307
P56134	ATP synthase subunit f, mitochondrial (ATP synthase membrane subunit f)	ATP5MF	4	3	29.8	10.918	1.4616	28.17	7	0.89738	22.616	7	1291	21740
Q96S55	ATPase WRNIP1 (EC 3.6.1.-) (Werner helicase-interacting protein 1)	WRNIP1	1	6	8.9	72.132	0.78917	42.154	6	0.89744	57.515	6	2488	24770
E9PLK3	Aminopeptidase (EC 3.4.11.-)	NPEPPS	10	20	25	102.99	1.0566	36.789	37	0.89752	40.736	37	1288	6973
A0A0J9YYL3	60 kDa poly(U)-binding-splicing factor (Poly(U)-binding-splicing factor PUF60) (Fragment)	PUF60	12	9	29.7	54.626	0.92469	49.763	26	0.89772	33.546	26	3212	19707
Q16795	NADH dehydrogenase [ubiquinone] 1 alpha subcomplex subunit 9, mitochondrial (Complex I-39kD) (CI-39kD) (NADH-ubiquinone oxidoreductase 39 kDa subunit)	NDUFA9	3	6	22	42.509	0.9308	14.344	11	0.89822	29.115	11	1868	55578
A6NGP5	Jupiter microtubule-associated homolog 2 (cDNA FLJ50401, highly similar to Hematological and neurological expressed1-like protein) (cDNA, FLJ79413, highly similar to Hematological and neurological expressed 1-like protein)	JPT2	8	3	32.6	18.906	0.74113	25.976	8	0.89854	48.585	8	2738	16593
P36543	V-type proton ATPase subunit E 1 (V-ATPase subunit E 1) (V-ATPase 31 kDa subunit) (p31) (Vacuolar proton pump subunit E 1)	ATP6V1E1	2	5	21.7	26.145	0.9317	35.37	14	0.8986	21.907	14	1018	20020
A6NJA2	Ubiquitin carboxyl-terminal hydrolase (EC 3.4.19.12)	USP14	4	6	13.8	51.086	1.6179	29.042	7	0.89902	21.775	7	1266	19363
P49770	Translation initiation factor eIF-2B subunit beta (S20I15) (S20III15) (eIF-2B GDP-GTP exchange factor subunit beta)	EIF2B2	1	1	5.1	38.989	0.96772	5.4248	8	0.89916	6.7419	8	1168	61484
Q9BWF3	RNA-binding protein 4 (Lark homolog) (hLark) (RNA-binding motif protein 4) (RNA-binding motif protein 4a)	RBM4	8	4	17.9	40.313	0.83209	43.471	6	0.89937	52.563	6	2621	22181
Q66K74	Microtubule-associated protein 1S (MAP-1S) (BPY2-interacting protein 1) (Microtubule-associated protein 8) (Variable charge Y chromosome 2-interacting protein 1) (VCY2-interacting protein 1) (VCY2IP-1) [Cleaved into: MAP1S heavy chain; MAP1S light chain]	MAP1S	1	1	1.4	112.21	0.74248	24.397	2	0.89941	18.836	2	1960	13336
Q12874	Splicing factor 3A subunit 3 (SF3a60) (Spliceosome-associated protein 61) (SAP 61)	SF3A3	1	7	17.8	58.848	0.97802	16.964	23	0.89945	22.51	23	1596	20021
P49588	Alanine--tRNA ligase, cytoplasmic (EC 6.1.1.7) (Alanyl-tRNA synthetase) (AlaRS) (Renal carcinoma antigen NY-REN-42)	AARS1	2	23	31.4	106.81	1.0036	23.647	69	0.89963	25.023	69	1159	5834
Q15392	Delta(24)-sterol reductase (EC 1.3.1.72) (24-dehydrocholesterol reductase) (3-beta-hydroxysterol Delta-24-reductase) (Diminuto/dwarf1 homolog) (Seladin-1)	DHCR24	3	2	4.3	60.101	0.71387	19.894	8	0.89968	13.707	8	1804	44561
P05026	Sodium/potassium-transporting ATPase subunit beta-1 (Sodium/potassium-dependent ATPase subunit beta-1)	ATP1B1	2	7	24.1	35.061	0.77975	36.096	25	0.89986	18.802	25	545	26735
Q14669	E3 ubiquitin-protein ligase TRIP12 (EC 2.3.2.26) (E3 ubiquitin-protein ligase for Arf) (ULF) (HECT-type E3 ubiquitin transferase TRIP12) (Thyroid receptor-interacting protein 12) (TR-interacting protein 12) (TRIP-12)	TRIP12	2	5	3	220.43	1.3044	18.491	2	0.89991	13.288	2	1732	54820
P07686	Beta-hexosaminidase subunit beta (EC 3.2.1.52) (Beta-N-acetylhexosaminidase subunit beta) (Hexosaminidase subunit B) (Cervical cancer proto-oncogene 7 protein) (HCC-7) (N-acetyl-beta-glucosaminidase subunit beta) [Cleaved into: Beta-hexosaminidase subunit beta chain B; Beta-hexosaminidase subunit beta chain A]	HEXB	4	3	8.3	63.111	1.0793	12.977	2	0.89998	37.761	2	588	67541
Q92922	SWI/SNF complex subunit SMARCC1 (BRG1-associated factor 155) (BAF155) (SWI/SNF complex 155 kDa subunit) (SWI/SNF-related matrix-associated actin-dependent regulator of chromatin subfamily C member 1)	SMARCC1	2	5	10.5	122.87			1	0.90005	16.338	2	2341	305
Q9P0L0	Vesicle-associated membrane protein-associated protein A (VAMP-A) (VAMP-associated protein A) (VAP-A) (33 kDa VAMP-associated protein) (VAP-33)	VAPA	2	8	36.1	27.893	0.84129	23.552	36	0.90025	31.02	37	2919	28515
P29083	General transcription factor IIE subunit 1 (General transcription factor IIE 56 kDa subunit) (Transcription initiation factor IIE subunit alpha) (TFIIE-alpha)	GTF2E1	4	2	8.7	49.452	0.71698	28.609	4	0.9008	9.5149	4	914	5333
O14744	Protein arginine N-methyltransferase 5 (PRMT5) (EC 2.1.1.320) (72 kDa ICln-binding protein) (Histone-arginine N-methyltransferase PRMT5) (Jak-binding protein 1) (Shk1 kinase-binding protein 1 homolog) (SKB1 homolog) (SKB1Hs) [Cleaved into: Protein arginine N-methyltransferase 5, N-terminally processed]	PRMT5	11	9	16.2	72.683	1.0714	30.637	32	0.90131	25.48	32	163	1628
P22033	Methylmalonyl-CoA mutase, mitochondrial (MCM) (EC 5.4.99.2) (Methylmalonyl-CoA isomerase)	MMUT	1	6	11.5	83.134	0.94276	12.426	6	0.90146	10.906	6	827	3572
Q15155	Nodal modulator 1 (pM5 protein)	NOMO1	10	8	9.6	134.32	0.8716	25.33	9	0.90198	17.468	9	1450	31820
O60783	28S ribosomal protein S14, mitochondrial (MRP-S14) (S14mt) (Mitochondrial small ribosomal subunit protein uS14m)	MRPS14	1	1	11.7	15.139	0.80675	9.5084	6	0.90219	16.168	6	303	92357
Q01780	Exosome component 10 (EC 3.1.13.-) (Autoantigen PM/Scl 2) (P100 polymyositis-scleroderma overlap syndrome-associated autoantigen) (Polymyositis/scleroderma autoantigen 100 kDa) (PM/Scl-100) (Polymyositis/scleroderma autoantigen 2)	EXOSC10	2	5	11.6	100.83	0.98073	17.029	5	0.90226	16.946	5	1516	80387
Q5VY30	Retinol-binding protein	RBP4	2	2	10.6	22.974	0.88617	14.607	12	0.9025	18.132	12	517	60027
Q96I59	Probable asparagine--tRNA ligase, mitochondrial (EC 6.1.1.22) (Asparaginyl-tRNA synthetase) (AsnRS)	NARS2	4	4	7.3	54.089	1.2626	1.2466	2	0.90274	11.966	2	2440	56047
P06744	Glucose-6-phosphate isomerase (GPI) (EC 5.3.1.9) (Autocrine motility factor) (AMF) (Neuroleukin) (NLK) (Phosphoglucose isomerase) (PGI) (Phosphohexose isomerase) (PHI) (Sperm antigen 36) (SA-36)	GPI	21	23	43.4	63.146	1.0552	50.75	125	0.90322	32.151	125	573	25826
P17174	Aspartate aminotransferase, cytoplasmic (cAspAT) (EC 2.6.1.1) (EC 2.6.1.3) (Cysteine aminotransferase, cytoplasmic) (Cysteine transaminase, cytoplasmic) (cCAT) (Glutamate oxaloacetate transaminase 1) (Transaminase A)	GOT1	1	18	56.9	46.247	1.0441	23.662	78	0.90347	30.307	78	762	18277
P29401	Transketolase (TK) (EC 2.2.1.1)	TKT	5	24	40.4	67.877	0.87385	28.785	165	0.90353	22.817	165	918	24795
P53618	Coatomer subunit beta (Beta-coat protein) (Beta-COP)	COPB1	2	14	18	107.14	1.1051	31.135	68	0.90438	34.154	68	1253	40710
P54136	Arginine--tRNA ligase, cytoplasmic (EC 6.1.1.19) (Arginyl-tRNA synthetase) (ArgRS)	RARS1	4	18	33.5	75.378	0.91414	26.553	47	0.90457	28.585	48	1264	3667
Q01518	Adenylyl cyclase-associated protein 1 (CAP 1)	CAP1	11	13	35.6	51.901	1.0315	33.94	32	0.90459	42.56	32	1512	5297
Q9H1B7	Probable E3 ubiquitin-protein ligase IRF2BPL (EC 2.3.2.27) (Enhanced at puberty protein 1) (Interferon regulatory factor 2-binding protein-like)	IRF2BPL	1	5	11.9	82.658	0.85731	1.239	2	0.90478	13.759	2	2687	53652
P49915	GMP synthase [glutamine-hydrolyzing] (EC 6.3.5.2) (GMP synthetase) (Glutamine amidotransferase)	GMPS	1	15	25	76.715	0.93782	32.47	25	0.90484	27.834	25	1175	31218
P05556	Integrin beta-1 (Fibronectin receptor subunit beta) (Glycoprotein IIa) (GPIIA) (VLA-4 subunit beta) (CD antigen CD29)	ITGB1	8	9	15.7	88.414	0.96026	27.346	24	0.90493	21.795	24	560	33525
P61970	Nuclear transport factor 2 (NTF-2) (Placental protein 15) (PP15)	NUTF2	2	5	48.8	14.478	0.81966	8.4272	12	0.90509	10.652	12	1361	1656
Q8N183	NADH dehydrogenase [ubiquinone] 1 alpha subcomplex assembly factor 2 (B17.2-like) (B17.2L) (Mimitin) (Myc-induced mitochondrial protein) (MMTN) (NDUFA12-like protein)	NDUFAF2	1	3	28.4	19.856	1.1761	24.427	12	0.90523	12.264	12	2152	51201
P25705	ATP synthase subunit alpha, mitochondrial (ATP synthase F1 subunit alpha)	ATP5F1A	7	25	45.8	59.75	0.95148	69.402	187	0.90583	27.134	187	870	17657
P53582	Methionine aminopeptidase 1 (MAP 1) (MetAP 1) (EC 3.4.11.18) (Peptidase M 1)	METAP1	2	4	12.7	43.215	1.1795	58.717	4	0.90595	16.995	4	1250	77039
E9PS17	N-terminal kinase-like protein	SCYL1	6	5	8.4	85.718	1.0312	20.222	6	0.90648	22.655	6	2454	22990
P38919	Eukaryotic initiation factor 4A-III (eIF-4A-III) (eIF4A-III) (EC 3.6.4.13) (ATP-dependent RNA helicase DDX48) (ATP-dependent RNA helicase eIF4A-3) (DEAD box protein 48) (Eukaryotic initiation factor 4A-like NUK-34) (Eukaryotic translation initiation factor 4A isoform 3) (Nuclear matrix protein 265) (NMP 265) (hNMP 265) [Cleaved into: Eukaryotic initiation factor 4A-III, N-terminally processed]	EIF4A3	4	13	33.8	46.871	0.99515	32.554	30	0.90654	41.647	30	1040	23685
Q9H8H0	Nucleolar protein 11	NOL11	3	4	8.2	81.123	1.0802	17.322	7	0.90654	8.243	7	2734	69301
A0A096LPD9	Thioredoxin reductase 2, mitochondrial	TXNRD2	9	2	9.8	33.167	1.2578	43.618	2	0.90664	27.386	2	2774	200301
Q15637	Splicing factor 1 (Mammalian branch point-binding protein) (BBP) (mBBP) (Transcription factor ZFM1) (Zinc finger gene in MEN1 locus) (Zinc finger protein 162)	SF1	3	6	12.2	68.329	0.98193	28.7	20	0.90724	21.044	20	1821	22936
P36542	ATP synthase subunit gamma, mitochondrial (ATP synthase F1 subunit gamma) (F-ATPase gamma subunit)	ATP5F1C	1	8	28.2	32.996	1.0846	27.538	28	0.90736	24.503	28	1017	47242
Q9BQ69	ADP-ribose glycohydrolase MACROD1 (MACRO domain-containing protein 1) (O-acetyl-ADP-ribose deacetylase MACROD1) (EC 3.1.1.106) (Protein LRP16) ([Protein ADP-ribosylaspartate] hydrolase MACROD1) (EC 3.2.2.-) ([Protein ADP-ribosylglutamate] hydrolase MACROD1) (EC 3.2.2.-)	MACROD1	1	3	12.9	35.505	0.56931	35.973	5	0.90747	94.991	5	2552	1239
F8W7U8	Double-strand break repair protein	MRE11	3	7	12.6	80.521	0.7511	16.655	6	0.90763	16.209	6	1177	80953
Q9NVH1	DnaJ homolog subfamily C member 11	DNAJC11	2	3	8.4	63.277	0.985	15.024	6	0.90765	10.542	6	2855	22135
Q13268	Dehydrogenase/reductase SDR family member 2, mitochondrial (EC 1.1.1.-) (Dicarbonyl reductase HEP27) (Protein D) (Short chain dehydrogenase/reductase family 25C member 1)	DHRS2	3	15	63.6	29.926	1.1062	45.83	138	0.90769	25.48	138	1635	5831
J3KRS1	Dehydrogenase/reductase SDR family member 7B (Fragment)	DHRS7B	3	2	23.2	13.61	1.0249	0.23968	2	0.90775	3.6916	2	1978	173564
Q5T3Q7	HEAT repeat-containing protein 1	HEATR1	3	8	4.8	233.27	1.0214	19.098	6	0.90777	45.41	6	2720	30794
Q8TAQ2	SWI/SNF complex subunit SMARCC2 (BRG1-associated factor 170) (BAF170) (SWI/SNF complex 170 kDa subunit) (SWI/SNF-related matrix-associated actin-dependent regulator of chromatin subfamily C member 2)	SMARCC2	2	3	4.4	132.88	0.66434	11.727	5	0.90782	34.754	5	2234	32648
P46783	40S ribosomal protein S10 (Small ribosomal subunit protein eS10)	RPS10	7	4	18.8	18.898	1.057	58.695	10	0.9079	19.275	10	1115	5728
H7BXY3	RNA helicase (EC 3.6.4.13)	DHX30	2	9	10.5	130.55	0.94016	28.511	12	0.90791	28.006	12	2041	10599
O15160	DNA-directed RNA polymerases I and III subunit RPAC1 (DNA-directed RNA polymerase I subunit C) (RNA polymerases I and III subunit AC1) (AC40) (DNA-directed RNA polymerases I and III 40 kDa polypeptide) (RPA40) (RPA39) (RPC40)	POLR1C	8	5	19.1	39.249	0.86083	21.614	6	0.90802	25.413	6	197	2649
A0A1B0GW44	Cathepsin D (EC 3.4.23.5)	CTSD	14	11	36	43.688	0.82925	44.196	77	0.90819	20.888	77	584	10649
P48047	ATP synthase subunit O, mitochondrial (ATP synthase peripheral stalk subunit OSCP) (Oligomycin sensitivity conferral protein) (OSCP)	ATP5PO	4	9	54.5	23.277	0.92751	54.662	44	0.90827	48.137	44	1129	65558
P27824	Calnexin (IP90) (Major histocompatibility complex class I antigen-binding protein p88) (p90)	CANX	11	15	22.8	67.567	1.1437	34.926	53	0.90833	29.569	53	900	18559
P50395	Rab GDP dissociation inhibitor beta (Rab GDI beta) (Guanosine diphosphate dissociation inhibitor 2) (GDI-2)	GDI2	6	25	54.4	50.663	0.96714	35.741	97	0.90876	26.969	97	1182	34186
Q6P996	Pyridoxal-dependent decarboxylase domain-containing protein 1 (EC 4.1.1.-)	PDXDC1	10	14	27.8	86.706	1.1137	30.18	22	0.90931	24.183	22	2000	26149
Q9NX58	Cell growth-regulating nucleolar protein	LYAR	2	4	10.6	43.614	0.97045	16.409	7	0.90932	10.178	7	2877	47511
P02671	Fibrinogen alpha chain [Cleaved into: Fibrinopeptide A; Fibrinogen alpha chain]	FGA	2	9	15.9	94.972	0.87205	46.607	14	0.90967	29.538	12	512	15161
P62277	40S ribosomal protein S13 (Small ribosomal subunit protein uS15)	RPS13	3	10	55	17.222	1.1895	57.326	39	0.90994	36.272	39	1378	69121
Q9NSD9	Phenylalanine--tRNA ligase beta subunit (EC 6.1.1.20) (Phenylalanyl-tRNA synthetase beta subunit) (PheRS)	FARSB	1	9	18.7	66.115	0.92375	32.382	15	0.91008	25.915	15	2826	1225
P35241	Radixin	RDX	4	10	15.1	68.563	0.82413	18.84	9	0.91014	19.912	9	993	17323
O15305	Phosphomannomutase 2 (PMM 2) (EC 5.4.2.8)	PMM2	9	5	35	28.082	0.85117	19.174	9	0.91026	19.631	9	207	2267
P50552	Vasodilator-stimulated phosphoprotein (VASP)	VASP	4	5	18.2	39.829	0.77274	17.367	9	0.9103	16.492	9	1187	167498
Q12931	Heat shock protein 75 kDa, mitochondrial (HSP 75) (TNFR-associated protein 1) (Tumor necrosis factor type 1 receptor-associated protein) (TRAP-1)	TRAP1	5	14	28.4	80.109	0.86897	32.326	69	0.9108	21.989	69	1603	7288
E9PIX0	Protein HGH1 homolog	HGH1	2	1	11.8	8.3805	0.93137	16.174	2	0.91092	2.0926	2	2598	122433
O14828	Secretory carrier-associated membrane protein 3 (Secretory carrier membrane protein 3)	SCAMP3	1	3	15	38.287	0.96968	9.4965	3	0.91099	21.922	3	169	19622
P84103	Serine/arginine-rich splicing factor 3 (Pre-mRNA-splicing factor SRP20) (Splicing factor, arginine/serine-rich 3)	SRSF3	2	7	40.9	19.329	0.9759	28.782	36	0.911	22.883	36	1491	7060
O75306	NADH dehydrogenase [ubiquinone] iron-sulfur protein 2, mitochondrial (EC 7.1.1.2) (Complex I-49kD) (CI-49kD) (NADH-ubiquinone oxidoreductase 49 kDa subunit)	NDUFS2	1	8	19.7	52.545	0.895	22.245	20	0.91109	22.806	20	329	17550
Q9Y3C6	Peptidyl-prolyl cis-trans isomerase-like 1 (PPIase) (EC 5.2.1.8) (Rotamase PPIL1)	PPIL1	1	4	33.1	18.237	0.90932	26.988	13	0.91153	24.106	13	3115	87899
P30040	Endoplasmic reticulum resident protein 29 (ERp29) (Endoplasmic reticulum resident protein 28) (ERp28) (Endoplasmic reticulum resident protein 31) (ERp31)	ERP29	3	7	26.8	28.993	0.93682	19.655	40	0.91156	19.748	40	924	31762
H7BZJ3	Protein disulfide-isomerase A3 (Fragment)	PDIA3	1	7	48.8	13.519	0.90286	6.1445	8	0.91188	9.2342	8	3266	68864
P31930	Cytochrome b-c1 complex subunit 1, mitochondrial (Complex III subunit 1) (Core protein I) (Ubiquinol-cytochrome-c reductase complex core protein 1)	UQCRC1	1	13	37.9	52.645	0.97963	28.447	51	0.91197	22.623	51	959	5254
G3V1U3	Methionine aminopeptidase 2 (Methionyl aminopeptidase 2, isoform CRA_c)	METAP2	7	4	25.3	35.991	0.57525	16.156	3	0.91209	20.577	3	1189	9380
Q9BQG0	Myb-binding protein 1A	MYBBP1A	3	14	13.6	148.85	1.3284	45.516	15	0.9122	17.072	15	2559	9253
H3BNW0	THUMP domain-containing protein 1	THUMPD1	2	2	20.7	15.761	1.1608	11.19	5	0.91265	18.689	5	2882	2215
Q8WY22	BRI3-binding protein (I3-binding protein) (Cervical cancer 1 proto-oncogene-binding protein KG19) (HCCRBP-1)	BRI3BP	1	1	7.6	27.835	0.97756	6.0085	4	0.91276	19.314	4	2289	195769
P20042	Eukaryotic translation initiation factor 2 subunit 2 (Eukaryotic translation initiation factor 2 subunit beta) (eIF-2-beta)	EIF2S2	1	7	21.9	38.388	1.2808	44.39	20	0.9132	18.886	20	798	29525
P22102	Trifunctional purine biosynthetic protein adenosine-3 [Includes: Phosphoribosylamine--glycine ligase (EC 6.3.4.13) (Glycinamide ribonucleotide synthetase) (GARS) (Phosphoribosylglycinamide synthetase); Phosphoribosylformylglycinamidine cyclo-ligase (EC 6.3.3.1) (AIR synthase) (AIRS) (Phosphoribosyl-aminoimidazole synthetase); Phosphoribosylglycinamide formyltransferase (EC 2.1.2.2) (5'-phosphorib…	GART	8	19	28.3	107.77	0.96542	21.003	30	0.91387	32.744	29	831	1230
P22059	Oxysterol-binding protein 1	OSBP	1	8	15.2	89.42	0.81773	37.632	7	0.91397	25.756	7	828	64044
B4DLN1	cDNA FLJ60124, highly similar to Mitochondrial dicarboxylate carrier	0	4	9	26.5	48.099	0.92078	16.779	43	0.91423	15.055	43	3224	63747
O95486	Protein transport protein Sec24A (SEC24-related protein A)	SEC24A	2	12	14.7	119.75	0.94739	17.637	19	0.91434	18.311	19	444	28475
C9JK83	STAM-binding protein (Fragment)	STAMBP	2	1	4.7	36.156	1.0555	16.269	3	0.9144	32.782	3	450	110566
P30613	Pyruvate kinase PKLR (EC 2.7.1.40) (Pyruvate kinase 1) (Pyruvate kinase isozymes L/R) (R-type/L-type pyruvate kinase) (Red cell/liver pyruvate kinase)	PKLR	2	8	24	61.829	0.80771	24.812	13	0.91449	19.669	13	946	6723
P49755	Transmembrane emp24 domain-containing protein 10 (Protein TMED10) (21 kDa transmembrane-trafficking protein) (S31I125) (S31III125) (Tmp-21-I) (Transmembrane protein Tmp21) (p23) (p24 family protein delta-1) (p24delta1) (p24delta)	TMED10	2	5	24.2	24.976	1.0502	13.256	27	0.91461	16.149	27	1166	95113
B1AK87	F-actin-capping protein subunit beta	CAPZB	2	9	42.3	29.295	1.1842	32.544	14	0.91474	26.967	14	3222	40047
I3L0N3	Vesicle-fusing ATPase (EC 3.6.4.6)	NSF	5	17	26.1	82.091	1.0933	32.832	16	0.91489	23.954	16	1106	6427
O14776	Transcription elongation regulator 1 (TATA box-binding protein-associated factor 2S) (Transcription factor CA150)	TCERG1	2	6	6	123.9	1.0748	12.305	6	0.91698	11.618	6	166	11922
P61956	Small ubiquitin-related modifier 2 (SUMO-2) (HSMT3) (SMT3 homolog 2) (SUMO-3) (Sentrin-2) (Ubiquitin-like protein SMT3B) (Smt3B)	SUMO2	5	2	23.2	10.871	0.88185	9.314	17	0.91703	10.954	17	1357	182425
A0A087WVZ9	DNA-directed RNA polymerase II subunit E (RPB5 homolog)	POLR2E	5	4	27.2	21.459	0.99729	26.729	3	0.91721	24.489	3	790	14103
O43760	Synaptogyrin-2 (Cellugyrin)	SYNGR2	5	2	8.9	24.81	1.611	31.028	3	0.91783	25.612	3	257	39014
P62333	26S proteasome regulatory subunit 10B (26S proteasome AAA-ATPase subunit RPT4) (Proteasome 26S subunit ATPase 6) (Proteasome subunit p42)	PSMC6	6	10	39.1	44.172	0.95641	48.458	23	0.91832	29.664	23	1387	14878
O60869	Endothelial differentiation-related factor 1 (EDF-1) (Multiprotein-bridging factor 1) (MBF1)	EDF1	1	4	37.2	16.368	1.002	14.867	5	0.91839	11.541	5	311	6632
Q8NC56	LEM domain-containing protein 2 (hLEM2)	LEMD2	3	3	8.3	56.974	0.87663	43.058	2	0.91853	10.169	2	2198	47949
P80404	4-aminobutyrate aminotransferase, mitochondrial (EC 2.6.1.19) ((S)-3-amino-2-methylpropionate transaminase) (EC 2.6.1.22) (GABA aminotransferase) (GABA-AT) (Gamma-amino-N-butyrate transaminase) (GABA transaminase) (GABA-T) (L-AIBAT)	ABAT	4	13	33.6	56.438	1.1944	20.784	31	0.91864	15.898	31	1471	14281
Q9HDC9	Adipocyte plasma membrane-associated protein (Protein BSCv)	APMAP	2	12	31.2	46.48	1.0564	40.685	43	0.91904	32.707	43	2772	49338
P61313	60S ribosomal protein L15 (Large ribosomal subunit protein eL15)	RPL15	7	11	44.1	24.146	1.4221	53.189	43	0.91978	48.573	43	1343	55987
P28066	Proteasome subunit alpha type-5 (Macropain zeta chain) (Multicatalytic endopeptidase complex zeta chain) (Proteasome zeta chain)	PSMA5	1	5	29.5	26.411	0.99147	17.006	25	0.91995	20.39	25	902	10841
O95861	3'(2'),5'-bisphosphate nucleotidase 1 (EC 3.1.3.7) (Bisphosphate 3'-nucleotidase 1) (PAP-inositol 1,4-phosphatase) (PIP)	BPNT1	6	8	34.7	33.392	0.96042	17.495	21	0.92003	18.432	21	465	10258
Q01082	Spectrin beta chain, non-erythrocytic 1 (Beta-II spectrin) (Fodrin beta chain) (Spectrin, non-erythroid beta chain 1)	SPTBN1	9	68	40	274.61	0.93722	33.246	176	0.92013	24.828	175	1507	6928
P10155	60 kDa SS-A/Ro ribonucleoprotein (60 kDa Ro protein) (60 kDa ribonucleoprotein Ro) (Ro60) (RoRNP) (Ro 60 kDa autoantigen) (Ro60 autoantigen) (Sjoegren syndrome antigen A2) (Sjoegren syndrome type A antigen) (SS-A) (TROVE domain family member 2)	RO60	3	4	11	60.67	0.56101	49.663	5	0.92014	67.519	5	647	115667
H0YGW7	ATP-binding cassette sub-family F member 1 (Fragment)	ABCF1	4	7	16.8	67.55	1.0404	13.673	7	0.9205	24.155	7	2216	2089
Q9BTX1	Nucleoporin NDC1 (hNDC1) (Transmembrane protein 48)	NDC1	1	1	3.1	76.304	0.64807	43.493	2	0.92073	1.9421	2	2597	130084
K7EKF3	DNA helicase (EC 3.6.4.12) (Fragment)	ERCC2	4	1	12.4	22.548	0.60183	7.0543	2	0.9213	5.352	2	774	50896
Q99961	Endophilin-A2 (EEN fusion partner of MLL) (Endophilin-2) (Extra eleven-nineteen leukemia fusion gene protein) (EEN) (SH3 domain protein 2B) (SH3 domain-containing GRB2-like protein 1)	SH3GL1	4	8	25	41.489	1.1828	28.916	14	0.92143	15.919	14	2545	47093
P02751	Fibronectin (FN) (Cold-insoluble globulin) (CIG) [Cleaved into: Anastellin; Ugl-Y1; Ugl-Y2; Ugl-Y3]	FN1	3	27	18.9	262.62	1.4694	19.353	28	0.92158	24.692	28	516	30336
A0A024RCR6	BCL2-associated athanogene 6 (HLA-B-associated transcript 3) (Large proline-rich protein BAG6)	BAG6	18	8	12.6	118.7	1.7922	48.954	7	0.92172	15.586	7	1105	17309
Q9Y678	Coatomer subunit gamma-1 (Gamma-1-coat protein) (Gamma-1-COP)	COPG1	3	17	27.1	97.717	1.044	25.816	71	0.92178	31.37	71	3176	12800
Q15084	Protein disulfide-isomerase A6 (EC 5.3.4.1) (Endoplasmic reticulum protein 5) (ER protein 5) (ERp5) (Protein disulfide isomerase P5) (Thioredoxin domain-containing protein 7)	PDIA6	1	18	42.3	48.121	0.9597	48.711	121	0.92182	23.465	121	1778	2678
A0A0C4DGA2	Enoyl-CoA delta isomerase 2, mitochondrial (Testicular secretory protein Li 33)	ECI2	6	13	56	40.183	1.1464	29.604	18	0.92187	41.202	18	354	2632
Q6IAA8	Ragulator complex protein LAMTOR1 (Late endosomal/lysosomal adaptor and MAPK and MTOR activator 1) (Lipid raft adaptor protein p18) (Protein associated with DRMs and endosomes) (p27Kip1-releasing factor from RhoA) (p27RF-Rho)	LAMTOR1	5	2	26.7	17.745	0.91338	8.2515	5	0.92197	8.6503	5	1977	126255
Q9H0N0	Ras-related protein Rab-6C (Rab6-like protein WTH3)	RAB6C	2	1	8.7	28.355	1.3987	8.4281	8	0.92232	12.811	8	1911	37548
Q562R1	Beta-actin-like protein 2 (Kappa-actin)	ACTBL2	1	12	26.3	42.003	0.70546	13.78	5	0.92252	10.639	5	1915	27310
Q6UXN9	WD repeat-containing protein 82 (Protein TMEM113) (Swd2)	WDR82	2	4	18.5	35.079	1.1545	9.2324	4	0.92264	23.031	4	2019	79703
P62805	Histone H4	H4C1	1	13	64.1	11.367	1.1496	74.599	239	0.92269	43.186	239	1396	29857
S4R3M9	Transcription elongation factor A protein 3 (Fragment)	TCEA3	2	2	8.1	38.652	0.76655	36.686	2	0.9231	32.048	2	366	137366
F5H6N1	Protein mago nashi homolog 2	MAGOHB	3	2	32.2	10.715	0.97716	8.7241	5	0.92321	14.025	5	2370	24087
P51149	Ras-related protein Rab-7a	RAB7A	7	8	40.6	23.489	0.91988	49.034	34	0.92347	18.869	34	1200	23200
Q9Y277	Voltage-dependent anion-selective channel protein 3 (VDAC-3) (hVDAC3) (Outer mitochondrial membrane protein porin 3)	VDAC3	7	9	35.3	30.658	1.4081	40.993	26	0.92381	21.688	26	3066	76503
P01023	Alpha-2-macroglobulin (Alpha-2-M) (C3 and PZP-like alpha-2-macroglobulin domain-containing protein 5)	A2M	4	32	28.8	163.29	1.5309	31.402	67	0.92398	29.742	67	502	10906
E7ES33	Septin-7	SEPTIN7	8	4	13.4	48.715	0.88213	9.1503	14	0.92432	13.442	14	1837	5533
Q86VP6	Cullin-associated NEDD8-dissociated protein 1 (Cullin-associated and neddylation-dissociated protein 1) (TBP-interacting protein of 120 kDa A) (TBP-interacting protein 120A) (p120 CAND1)	CAND1	3	18	17.9	136.37	1.0447	27.094	48	0.92442	27.602	48	2097	15197
P35232	Prohibitin	PHB	6	10	43	29.804	0.91301	17.706	72	0.92453	12.797	72	991	940
K7ES02	Bleomycin hydrolase (EC 3.4.22.40) (Fragment)	BLMH	6	3	13.8	37.198	0.97841	19.927	6	0.92483	22.255	6	1687	19264
P17568	NADH dehydrogenase [ubiquinone] 1 beta subcomplex subunit 7 (Cell adhesion protein SQM1) (Complex I-B18) (CI-B18) (NADH-ubiquinone oxidoreductase B18 subunit)	NDUFB7	1	1	7.3	16.402	0.74255	9.1265	5	0.92485	17.855	5	766	37667
P19623	Spermidine synthase (SPDSY) (EC 2.5.1.16) (Putrescine aminopropyltransferase)	SRM	5	6	35.1	33.824	0.99476	36.666	16	0.92493	25.367	16	794	1199
A6NHR9	Structural maintenance of chromosomes flexible hinge domain-containing protein 1 (SMC hinge domain-containing protein 1) (EC 3.6.1.-)	SMCHD1	3	5	3.4	226.37	1.0152	23.144	3	0.92511	25.419	3	92	17012
Q5SNT2	Transmembrane protein 201 (Spindle-associated membrane protein 1)	TMEM201	1	1	1.5	72.235	0.81004	16.033	3	0.92515	12.453	3	1930	139014
M0R026	2-hydroxyacyl-CoA lyase 2 (Acetolactate synthase-like protein) (IlvB-like protein)	ILVBL	6	6	20.2	56.732	0.85783	13.278	15	0.92545	16.807	15	82	3079
Q9Y6Y8	SEC23-interacting protein (p125)	SEC23IP	2	6	8.6	111.08	0.7533	15.862	8	0.92565	50.815	8	3198	26478
P19823	Inter-alpha-trypsin inhibitor heavy chain H2 (ITI heavy chain H2) (ITI-HC2) (Inter-alpha-inhibitor heavy chain 2) (Inter-alpha-trypsin inhibitor complex component II) (Serum-derived hyaluronan-associated protein) (SHAP)	ITIH2	3	12	18.7	106.46	1.2789	21.595	37	0.92567	31.557	37	795	9662
P30049	ATP synthase subunit delta, mitochondrial (ATP synthase F1 subunit delta) (F-ATPase delta subunit)	ATP5F1D	1	2	13.7	17.49	1.0591	8.6842	4	0.92608	8.6925	4	931	18748
Q9Y230	RuvB-like 2 (EC 3.6.4.12) (48 kDa TATA box-binding protein-interacting protein) (48 kDa TBP-interacting protein) (51 kDa erythrocyte cytosolic protein) (ECP-51) (INO80 complex subunit J) (Repressing pontin 52) (Reptin 52) (TIP49b) (TIP60-associated protein 54-beta) (TAP54-beta)	RUVBL2	6	8	22.5	51.156	0.80052	18.442	16	0.92621	36.9	16	3056	13452
J3QT28	Mitotic checkpoint protein BUB3 (Fragment)	BUB3	3	7	31.7	31.703	1.1019	50.802	8	0.92649	23.84	8	252	125109
F5H669	Cleavage and polyadenylation-specificity factor subunit 7 (Fragment)	CPSF7	5	4	13.6	41.265	1.3377	19.649	8	0.92669	43.616	8	2174	37709
I3L397	Eukaryotic translation initiation factor 5A (eIF-5A) (Fragment)	EIF5A	8	12	61	16.019	0.86832	50.89	65	0.9268	24.148	65	1432	4331
P14854	Cytochrome c oxidase subunit 6B1 (Cytochrome c oxidase subunit VIb isoform 1) (COX VIb-1)	COX6B1	2	4	41.9	10.192	0.85547	16.181	5	0.92684	25.82	5	722	6098
E9PF19	Transducin beta-like protein 2	TBL2	4	5	15.1	45.935	1.0493	29.919	16	0.92693	19.69	16	3142	17199
Q6P1X6	UPF0598 protein C8orf82	C8orf82	2	3	18.5	23.889	0.84039	20.888	3	0.92719	36.146	3	1992	122447
Q6P2E9	Enhancer of mRNA-decapping protein 4 (Autoantigen Ge-1) (Autoantigen RCD-8) (Human enhancer of decapping large subunit) (Hedls)	EDC4	2	13	15.3	151.66	0.8949	24.7	15	0.92748	22.768	15	1993	476
P14618	Pyruvate kinase PKM (EC 2.7.1.40) (Cytosolic thyroid hormone-binding protein) (CTHBP) (Opa-interacting protein 3) (OIP-3) (Pyruvate kinase 2/3) (Pyruvate kinase muscle isozyme) (Thyroid hormone-binding protein 1) (THBP1) (Tumor M2-PK) (p58)	PKM	11	33	63.3	57.936	0.9285	33.746	237	0.92758	27.732	238	717	5995
Q9UHV9	Prefoldin subunit 2	PFDN2	1	2	16.9	16.648	1.6101	54.218	6	0.92775	44.57	6	2978	64188
P25685	DnaJ homolog subfamily B member 1 (DnaJ protein homolog 1) (Heat shock 40 kDa protein 1) (HSP40) (Heat shock protein 40) (Human DnaJ protein 1) (hDj-1)	DNAJB1	6	7	26.2	38.044	0.88208	23.4	8	0.92796	24.056	8	869	32160
Q9Y6C9	Mitochondrial carrier homolog 2 (Met-induced mitochondrial protein)	MTCH2	1	4	16.8	33.331	0.976	25.957	13	0.92804	25.314	13	3183	69524
H0Y5T1	CLIP-associating protein 1 (Fragment)	CLASP1	3	3	3.4	139.93	0.78033	12.11	4	0.92812	11.119	4	2065	56526
Q13561	Dynactin subunit 2 (50 kDa dynein-associated polypeptide) (Dynactin complex 50 kDa subunit) (DCTN-50) (p50 dynamitin)	DCTN2	8	8	25.4	44.23	0.86832	39.451	13	0.92819	21.77	13	1668	48914
B0QYK0	RNA-binding protein EWS	EWSR1	5	3	8.6	64.929	0.90471	15.559	9	0.92891	13.947	9	1517	3096
P37837	Transaldolase (EC 2.2.1.2)	TALDO1	4	11	34.1	37.54	0.97513	33.041	65	0.9291	19.174	65	1032	12500
Q14571	Inositol 1,4,5-trisphosphate receptor type 2 (IP3 receptor isoform 2) (IP3R 2) (InsP3R2) (Type 2 inositol 1,4,5-trisphosphate receptor) (Type 2 InsP3 receptor)	ITPR2	10	7	4.3	308.06	0.87835	27.03	7	0.93013	39.009	7	1731	16673
A0A0B4J2A0	FGGY_N domain-containing protein	0	2	4	11.7	51.504	1.1453	4.7096	2	0.93058	0.97112	2	2975	2235
O95456	Proteasome assembly chaperone 1 (PAC-1) (Chromosome 21 leucine-rich protein) (C21-LRP) (Down syndrome critical region protein 2)	PSMG1	2	2	8.3	32.854	0.81731	8.2134	12	0.9306	9.738	12	440	2736
P38159	RNA-binding motif protein, X chromosome (Glycoprotein p43) (Heterogeneous nuclear ribonucleoprotein G) (hnRNP G) [Cleaved into: RNA-binding motif protein, X chromosome, N-terminally processed]	RBMX	9	8	19.7	42.331	1.111	39.32	22	0.93135	25.482	22	1034	10943
X6R631	39S ribosomal protein L55, mitochondrial (Mitochondrial ribosomal protein L55, isoform CRA_b)	MRPL55	2	1	29.1	6.8487	0.82715	29.186	2	0.93159	12.636	2	2077	141504
Q9Y570	Protein phosphatase methylesterase 1 (PME-1) (EC 3.1.1.89)	PPME1	1	5	19.7	42.315	1.3816	16.82	6	0.93173	25.451	6	3152	53069
P51572	B-cell receptor-associated protein 31 (BCR-associated protein 31) (Bap31) (6C6-AG tumor-associated antigen) (Protein CDM) (p28)	BCAP31	7	4	22	27.991	0.84411	18.588	9	0.9319	24.545	9	1208	6422
P38646	Stress-70 protein, mitochondrial (75 kDa glucose-regulated protein) (GRP-75) (Heat shock 70 kDa protein 9) (Mortalin) (MOT) (Peptide-binding protein 74) (PBP74)	HSPA9	7	39	57	73.68	0.98439	33.157	249	0.93223	33.832	249	1039	11960
Q9UN37	Vacuolar protein sorting-associated protein 4A (EC 3.6.4.6) (Protein SKD2) (VPS4-1) (hVPS4)	VPS4A	3	3	8.2	48.897	1.0175	30.777	4	0.93233	26.407	4	3031	68055
Q16706	Alpha-mannosidase 2 (EC 3.2.1.114) (Golgi alpha-mannosidase II) (AMan II) (Man II) (Mannosidase alpha class 2A member 1) (Mannosyl-oligosaccharide 1,3-1,6-alpha-mannosidase)	MAN2A1	1	7	8.9	131.14	1.1719	42.574	2	0.93258	12.999	2	1861	55110
Q13151	Heterogeneous nuclear ribonucleoprotein A0 (hnRNP A0)	HNRNPA0	1	6	22.6	30.84	1.4028	32.221	55	0.93278	22.316	55	1622	26075
Q14697	Neutral alpha-glucosidase AB (EC 3.2.1.207) (Alpha-glucosidase 2) (Glucosidase II subunit alpha)	GANAB	4	18	20.4	106.87	1.108	48.442	45	0.933	29.784	45	1742	6130
Q9UBT2	SUMO-activating enzyme subunit 2 (EC 2.3.2.-) (Anthracycline-associated resistance ARX) (Ubiquitin-like 1-activating enzyme E1B) (Ubiquitin-like modifier-activating enzyme 2)	UBA2	6	9	19.4	71.223	0.74577	29.218	3	0.93316	48.841	3	2947	5338
O00764	Pyridoxal kinase (EC 2.7.1.35) (Pyridoxine kinase)	PDXK	3	6	28.8	35.102	0.82862	41.597	17	0.93318	36.61	17	148	18751
P61160	Actin-related protein 2 (Actin-like protein 2)	ACTR2	4	8	24.4	44.76	0.86346	39.312	23	0.93338	22.159	23	1332	34430
I3L0Q0	Ubiquitin-conjugating enzyme E2 G1	UBE2G1	3	1	20.4	5.5393	1.0518	10.414	6	0.93338	14.961	6	1372	182251
P26368	Splicing factor U2AF 65 kDa subunit (U2 auxiliary factor 65 kDa subunit) (hU2AF(65)) (hU2AF65) (U2 snRNP auxiliary factor large subunit)	U2AF2	3	9	36.6	53.5	1.0035	26.846	22	0.93357	42.61	22	878	16658
B4DR80	Serine/threonine-protein kinase 24 (cDNA FLJ61159, highly similar to Serine/threonine-protein kinase 24)	STK24	1	5	11.9	45.835	0.88081	16.23	7	0.93383	12.912	7	3225	9853
P62318	Small nuclear ribonucleoprotein Sm D3 (Sm-D3) (snRNP core protein D3)	SNRPD3	2	4	37.3	13.916	1.525	43.593	16	0.93395	22.374	16	1385	57295
P01116	GTPase KRas (EC 3.6.5.2) (K-Ras 2) (Ki-Ras) (c-K-ras) (c-Ki-ras) [Cleaved into: GTPase KRas, N-terminally processed]	KRAS	5	2	12.2	21.656	1.098	14.608	5	0.93413	24.594	5	505	135988
P12277	Creatine kinase B-type (EC 2.7.3.2) (Brain creatine kinase) (B-CK) (Creatine kinase B chain) (Creatine phosphokinase B-type) (CPK-B)	CKB	5	8	31.2	42.644	1.0396	21.55	38	0.93421	23.871	38	688	34048
P31040	Succinate dehydrogenase [ubiquinone] flavoprotein subunit, mitochondrial (EC 1.3.5.1) (Flavoprotein subunit of complex II) (Fp)	SDHA	3	14	32.2	72.691	0.91805	26.721	34	0.93429	38.557	34	952	1158
P00338	L-lactate dehydrogenase A chain (LDH-A) (EC 1.1.1.27) (Cell proliferation-inducing gene 19 protein) (LDH muscle subunit) (LDH-M) (Renal carcinoma antigen NY-REN-59)	LDHA	21	20	46.7	36.688	1.0058	43.895	196	0.93456	27.331	197	479	23273
A0A0A0MS45	Component of oligomeric Golgi complex 4 (Conserved oligomeric Golgi complex subunit 4)	COG4	3	2	4	87.183	1.0408	8.0374	5	0.93459	13.546	5	2742	75670
Q7L5D6	Golgi to ER traffic protein 4 homolog (Conserved edge-expressed protein) (Transmembrane domain recognition complex 35 kDa subunit) (TRC35)	GET4	4	3	12.2	36.504	1.0083	8.3468	8	0.93581	10.106	8	2045	247
P27338	Amine oxidase [flavin-containing] B (EC 1.4.3.4) (Monoamine oxidase type B) (MAO-B)	MAOB	1	3	6.5	58.762	1.3767	5.2068	3	0.93589	12.873	3	890	61733
E7EVX8	Pre-mRNA-processing factor 31 (U4/U6 small nuclear ribonucleoprotein Prp31)	PRPF31	5	6	15.8	54.766	0.9071	31.604	12	0.93596	36.375	12	2282	20493
P61081	NEDD8-conjugating enzyme Ubc12 (EC 2.3.2.34) (NEDD8 carrier protein) (Ubiquitin-conjugating enzyme E2 M)	UBE2M	3	4	24	20.9	0.85689	38.876	10	0.9364	29.588	10	1327	32896
O60701	UDP-glucose 6-dehydrogenase (UDP-Glc dehydrogenase) (UDP-GlcDH) (UDPGDH) (EC 1.1.1.22)	UGDH	7	24	56.9	55.023	1.1268	34.132	213	0.93702	25.435	213	296	21780
K7EJL1	AP-1 complex subunit mu-1	AP1M1	10	8	29.9	40.296	1.4681	33.021	9	0.93734	31.114	9	2633	54426
Q92526	T-complex protein 1 subunit zeta-2 (TCP-1-zeta-2) (CCT-zeta-2) (CCT-zeta-like) (TCP-1-zeta-like) (Testis-specific Tcp20) (Testis-specific protein TSA303)	CCT6B	2	5	9.8	57.821	1.0257	1.9561	2	0.93745	9.2842	2	2297	67671
Q8WX92	Negative elongation factor B (NELF-B) (Cofactor of BRCA1)	NELFB	1	2	4	65.697	0.99693	19.579	3	0.93777	10.178	3	2283	18657
H3BUW8	Lon protease homolog 2, peroxisomal	LONP2	2	1	4	33.889	1.2077	1.646	2	0.93777	56.281	2	2101	41266
E9PL57	NEDD8 (Neddylin) (Ubiquitin-like protein Nedd8) (Fragment)	NEDD8-MDP1	6	2	15.9	19.536	1.0833	20.28	3	0.9378	4.4484	3	3244	45335
P21281	V-type proton ATPase subunit B, brain isoform (V-ATPase subunit B 2) (Endomembrane proton pump 58 kDa subunit) (HO57) (Vacuolar proton pump subunit B 2)	ATP6V1B2	7	12	32.7	56.5	1.0527	39.067	17	0.93785	29.079	17	812	26544
A0A0B4J2A4	3-ketoacyl-CoA thiolase, mitochondrial	ACAA2	6	16	57.1	41.601	0.87205	24.175	53	0.938	19.751	53	1081	2154
P02787	Serotransferrin (Transferrin) (Beta-1 metal-binding globulin) (Siderophilin)	TF	7	22	38.8	77.063	0.99772	23.989	33	0.93813	25.135	33	522	18177
Q9UKM9	RNA-binding protein Raly (Autoantigen p542) (Heterogeneous nuclear ribonucleoprotein C-like 2) (hnRNP core protein C-like 2) (hnRNP associated with lethal yellow protein homolog)	RALY	5	13	54.6	32.463	1.0523	39.827	37	0.93843	33.713	37	3006	26146
K7EP07	Tubulin-folding cofactor B (Fragment)	TBCB	6	3	23.7	19.251	1.1939	10.193	3	0.9386	17.041	3	2500	18773
P51148	Ras-related protein Rab-5C (L1880) (RAB5L)	RAB5C	15	4	23.6	23.482	1.2272	46.686	11	0.93895	32.633	11	1199	74778
P63000	Ras-related C3 botulinum toxin substrate 1 (EC 3.6.5.2) (Cell migration-inducing gene 5 protein) (Ras-like protein TC25) (p21-Rac1)	RAC1	8	5	24.5	21.45	0.90794	31.295	23	0.93991	22.835	23	1422	77881
O95394	Phosphoacetylglucosamine mutase (PAGM) (EC 5.4.2.3) (Acetylglucosamine phosphomutase) (N-acetylglucosamine-phosphate mutase) (Phosphoglucomutase-3) (PGM 3)	PGM3	7	6	10.5	59.851	1.0708	34.81	16	0.94045	14.662	16	436	7632
Q16555	Dihydropyrimidinase-related protein 2 (DRP-2) (Collapsin response mediator protein 2) (CRMP-2) (N2A3) (Unc-33-like phosphoprotein 2) (ULIP-2)	DPYSL2	7	16	42	62.293	0.74911	28.27	83	0.94083	21.991	83	1848	11794
Q15424	Scaffold attachment factor B1 (SAF-B) (SAF-B1) (HSP27 estrogen response element-TATA box-binding protein) (HSP27 ERE-TATA-binding protein)	SAFB	2	10	17.9	102.64	0.91234	21.921	20	0.94105	22.24	20	1809	5519
E7EX73	Eukaryotic translation initiation factor 4 gamma 1	EIF4G1	19	20	22.1	158.64	1.1039	36.88	68	0.94109	32.933	68	1542	11483
P55327	Tumor protein D52 (Protein N8)	TPD52	4	5	43.3	24.327	0.90391	33.101	11	0.94169	38.922	11	1286	20138
Q9BSH4	Translational activator of cytochrome c oxidase 1 (Coiled-coil domain-containing protein 44) (Translational activator of mitochondrially-encoded cytochrome c oxidase I)	TACO1	1	3	18.9	32.477	0.97729	9.9663	10	0.94198	21.435	10	2580	13405
V9GYJ9	28S ribosomal protein S29, mitochondrial (Fragment)	DAP3	4	2	9.8	30.401	0.89868	2.5033	2	0.94199	6.8965	2	1202	54056
P43246	DNA mismatch repair protein Msh2 (hMSH2) (MutS protein homolog 2)	MSH2	6	4	4.1	104.74	0.75769	15.624	12	0.94207	13.547	12	1089	45805
O96019	Actin-like protein 6A (53 kDa BRG1-associated factor A) (Actin-related protein Baf53a) (ArpNbeta) (BRG1-associated factor 53A) (BAF53A) (INO80 complex subunit K)	ACTL6A	4	7	23.8	47.46	0.78352	16.057	4	0.94249	15.355	4	476	48998
P00505	Aspartate aminotransferase, mitochondrial (mAspAT) (EC 2.6.1.1) (EC 2.6.1.7) (Fatty acid-binding protein) (FABP-1) (Glutamate oxaloacetate transaminase 2) (Kynurenine aminotransferase 4) (Kynurenine aminotransferase IV) (Kynurenine--oxoglutarate transaminase 4) (Kynurenine--oxoglutarate transaminase IV) (Plasma membrane-associated fatty acid-binding protein) (FABPpm) (Transaminase A)	GOT2	1	17	43.3	47.517	1.0822	34.791	100	0.94255	24.471	100	492	20153
O00625	Pirin (EC 1.13.11.24) (Probable quercetin 2,3-dioxygenase PIR) (Probable quercetinase)	PIR	1	1	4.5	32.113	1.0185	11.073	4	0.94266	7.1401	4	144	143304
Q8NBS9	Thioredoxin domain-containing protein 5 (Endoplasmic reticulum resident protein 46) (ER protein 46) (ERp46) (Thioredoxin-like protein p46)	TXNDC5	1	16	38.7	47.628	0.99988	23.172	93	0.9431	22.099	93	2193	12647
Q9P2I0	Cleavage and polyadenylation specificity factor subunit 2 (Cleavage and polyadenylation specificity factor 100 kDa subunit) (CPSF 100 kDa subunit)	CPSF2	2	3	4.6	88.486	0.84139	10.822	2	0.94435	20.637	2	2933	30725
O00161	Synaptosomal-associated protein 23 (SNAP-23) (Vesicle-membrane fusion protein SNAP-23)	SNAP23	11	7	47.4	23.354	0.91424	24.265	8	0.94438	7.5977	8	108	9801
C9JTN7	Nucleolysin TIA-1 isoform p40	TIA1	6	6	30.5	31.624	0.98632	28.706	8	0.94469	20.865	8	957	1103
E7EX90	Dynactin subunit 1	DCTN1	4	6	7.7	139.09	0.82739	18.641	6	0.94484	14.679	6	1711	6129
Q9BZE4	Nucleolar GTP-binding protein 1 (Chronic renal failure gene protein) (GTP-binding protein NGB)	GTPBP4	2	6	12.3	73.964	0.98793	20.918	12	0.9449	25.619	12	2652	5542
Q13347	Eukaryotic translation initiation factor 3 subunit I (eIF3i) (Eukaryotic translation initiation factor 3 subunit 2) (TGF-beta receptor-interacting protein 1) (TRIP-1) (eIF-3-beta) (eIF3 p36)	EIF3I	2	11	47.4	36.501	1.0349	11.594	12	0.9449	15.11	12	1640	35808
O75607	Nucleoplasmin-3	NPM3	1	3	29.2	19.343	0.91462	9.5473	16	0.94527	21.436	16	360	1263
E9PSI1	Transmembrane 9 superfamily member	0	9	5	8.2	92.386	1.1008	11.366	6	0.94576	16.67	6	3246	7949
X6R700	Chromatin target of PRMT1 protein	CHTOP	4	4	19.7	23.661	1.0009	11.989	4	0.94581	39.271	4	3130	21447
Q8TCS8	Polyribonucleotide nucleotidyltransferase 1, mitochondrial (EC 2.7.7.8) (3'-5' RNA exonuclease OLD35) (PNPase old-35) (Polynucleotide phosphorylase 1) (PNPase 1) (Polynucleotide phosphorylase-like protein)	PNPT1	3	10	17.2	85.95	0.94585	24.416	14	0.94607	20.837	14	2244	16349
Q9BXY0	Protein MAK16 homolog (NNP78) (Protein RBM13)	MAK16	2	3	11.3	35.368	0.92084	29.196	3	0.94615	7.9259	3	2634	13931
H0YA82	La-related protein 7 (Fragment)	LARP7	3	2	10.5	38.093	0.87863	4.2189	2	0.94674	3.6862	2	1894	56853
P30153	Serine/threonine-protein phosphatase 2A 65 kDa regulatory subunit A alpha isoform (Medium tumor antigen-associated 61 kDa protein) (PP2A subunit A isoform PR65-alpha) (PP2A subunit A isoform R1-alpha)	PPP2R1A	4	13	28.9	65.308	0.94662	19.584	52	0.9468	13.559	52	937	11580
Q8N392	Rho GTPase-activating protein 18 (MacGAP) (Rho-type GTPase-activating protein 18)	ARHGAP18	1	10	17.8	74.976	1.0054	35.829	20	0.94761	43.425	20	2161	7400
Q9UBQ0	Vacuolar protein sorting-associated protein 29 (hVPS29) (PEP11 homolog) (Vesicle protein sorting 29)	VPS29	2	4	22	20.505	1.4198	60.291	8	0.94805	27.156	8	2943	64749
P62826	GTP-binding nuclear protein Ran (Androgen receptor-associated protein 24) (GTPase Ran) (Ras-like protein TC4) (Ras-related nuclear protein)	RAN	7	12	38.4	24.423	1.0694	47.188	90	0.94807	27.782	90	1398	2421
P62861	40S ribosomal protein S30 (Small ribosomal subunit protein eS30)	FAU	2	3	20.3	6.6478	1.1295	31.449	20	0.94818	11.919	20	1406	62072
P48506	Glutamate--cysteine ligase catalytic subunit (EC 6.3.2.2) (GCS heavy chain) (Gamma-ECS) (Gamma-glutamylcysteine synthetase)	GCLC	7	8	16.6	72.765	1.2015	29.649	22	0.94853	16.057	22	1133	33532
O95870	Phosphatidylserine lipase ABHD16A (EC 3.1.-.-) (Alpha/beta hydrolase domain-containing protein 16A) (Abhydrolase domain-containing protein 16A) (HLA-B-associated transcript 5) (hBAT5) (Monoacylglycerol lipase ABHD16A) (EC 3.1.1.23) (Protein G5)	ABHD16A	5	2	3.8	63.243	0.75581	36.267	3	0.94874	70.213	3	468	14399
P13073	Cytochrome c oxidase subunit 4 isoform 1, mitochondrial (Cytochrome c oxidase polypeptide IV) (Cytochrome c oxidase subunit IV isoform 1) (COX IV-1)	COX4I1	6	6	32.5	19.576	1.231	37.779	31	0.94885	22.696	31	695	21835
Q9Y3I0	RNA-splicing ligase RtcB homolog (EC 6.5.1.8) (3'-phosphate/5'-hydroxy nucleic acid ligase)	RTCB	1	11	26.7	55.21	0.93188	16.228	20	0.94895	50.858	20	3124	66801
P14625	Endoplasmin (94 kDa glucose-regulated protein) (GRP-94) (Heat shock protein 90 kDa beta member 1) (Tumor rejection antigen 1) (gp96 homolog)	HSP90B1	6	33	39.7	92.468	0.97232	36.497	279	0.94899	22.428	279	718	18795
P24534	Elongation factor 1-beta (EF-1-beta)	EEF1B2	4	8	34.2	24.763	1.2092	27.347	45	0.94903	31.427	45	859	12060
P11388	DNA topoisomerase 2-alpha (EC 5.6.2.2) (DNA topoisomerase II, alpha isozyme)	TOP2A	2	16	13.7	174.38	0.95914	50.037	17	0.94915	31.405	17	674	50106
F8VPD4	Aspartate carbamoyltransferase (EC 2.1.3.2) (EC 3.5.2.3) (EC 6.3.5.5) (CAD protein) (Dihydroorotase) (Glutamine-dependent carbamoyl-phosphate synthase)	CAD	4	19	12.5	236.02	0.85695	19.982	35	0.94961	35.955	35	897	1099
Q6P1M0	Long-chain fatty acid transport protein 4 (FATP-4) (Fatty acid transport protein 4) (Arachidonate--CoA ligase) (EC 6.2.1.15) (Long-chain-fatty-acid--CoA ligase) (Solute carrier family 27 member 4) (Very long-chain acyl-CoA synthetase 4) (ACSVL4) (EC 6.2.1.-)	SLC27A4	1	1	1.7	72.063	1.2128	9.2124	2	0.94983	7.1527	2	1991	195797
Q9HCC0	Methylcrotonoyl-CoA carboxylase beta chain, mitochondrial (MCCase subunit beta) (EC 6.4.1.4) (3-methylcrotonyl-CoA carboxylase 2) (3-methylcrotonyl-CoA carboxylase non-biotin-containing subunit) (3-methylcrotonyl-CoA:carbon dioxide ligase subunit beta)	MCCC2	5	7	17.8	61.332	0.96725	18.726	24	0.94998	36.849	24	2759	2753
Q08209	Serine/threonine-protein phosphatase 2B catalytic subunit alpha isoform (EC 3.1.3.16) (CAM-PRP catalytic subunit) (Calmodulin-dependent calcineurin A subunit alpha isoform)	PPP3CA	6	3	7.5	58.687	1.0069	17.346	2	0.95014	24.996	2	1570	70466
P41252	Isoleucine--tRNA ligase, cytoplasmic (EC 6.1.1.5) (Isoleucyl-tRNA synthetase) (IRS) (IleRS)	IARS1	6	15	15.8	144.5	0.83728	35.826	33	0.95037	30.518	33	1066	18064
H0YDP7	39S ribosomal protein L49, mitochondrial (Fragment)	MRPL49	2	2	20.5	14.572	1.0149	8.5703	11	0.95107	8.7872	11	1644	38859
P40926	Malate dehydrogenase, mitochondrial (EC 1.1.1.37)	MDH2	2	19	63.9	35.503	0.88176	32.165	167	0.95122	27.674	167	1056	7738
P25788	Proteasome subunit alpha type-3 (Macropain subunit C8) (Multicatalytic endopeptidase complex subunit C8) (Proteasome component C8)	PSMA3	4	6	27.8	28.433	1.1457	26.049	16	0.95143	26.374	16	873	24886
Q9BPW8	Protein NipSnap homolog 1 (NipSnap1)	NIPSNAP1	4	5	21.5	33.31	0.8652	1.4851	2	0.95148	5.2628	2	2547	93387
P27487	Dipeptidyl peptidase 4 (EC 3.4.14.5) (ADABP) (Adenosine deaminase complexing protein 2) (ADCP-2) (Dipeptidyl peptidase IV) (DPP IV) (T-cell activation antigen CD26) (TP103) (CD antigen CD26) [Cleaved into: Dipeptidyl peptidase 4 membrane form (Dipeptidyl peptidase IV membrane form); Dipeptidyl peptidase 4 soluble form (Dipeptidyl peptidase IV soluble form)]	DPP4	4	13	17.6	88.278	0.91662	31.952	44	0.95151	34.376	44	893	28248
J3QLI9	Small nuclear ribonucleoprotein Sm D1	SNRPD1	2	1	17.3	8.3926	1.1018	23.515	4	0.9516	12.301	4	1383	152832
F8VZJ2	Nascent polypeptide-associated complex subunit alpha	NACA	7	3	30.9	15.016	1.1219	14.581	12	0.95175	16.918	12	101	32629
R4GMT0	Alpha-centractin	ACTR1A	3	7	32.5	37.433	0.84419	17.101	10	0.95177	22.01	10	1333	4212
Q99797	Mitochondrial intermediate peptidase (MIP) (EC 3.4.24.59)	MIPEP	1	2	4.3	80.64	0.75146	5.6268	4	0.95209	20.332	4	2532	84705
Q13596	Sorting nexin-1	SNX1	7	9	22	59.069	0.83836	23.21	19	0.95227	14.669	19	1674	15058
E9PCB6	Neurolysin, mitochondrial	NLN	4	3	5.5	68.867	1.2974	45.137	5	0.95232	37.953	5	2650	6176
P13667	Protein disulfide-isomerase A4 (EC 5.3.4.1) (Endoplasmic reticulum resident protein 70) (ER protein 70) (ERp70) (Endoplasmic reticulum resident protein 72) (ER protein 72) (ERp-72) (ERp72)	PDIA4	2	40	55.3	72.932	1.0116	43.735	196	0.95237	28.393	196	701	2775
G5EA06	28S ribosomal protein S27, mitochondrial (Mitochondrial ribosomal protein S27, isoform CRA_b)	MRPS27	4	3	10.6	41.329	0.87405	13.433	11	0.95249	14.583	11	2304	41158
Q9Y2Z0	Protein SGT1 homolog (Protein 40-6-3) (Sgt1) (Suppressor of G2 allele of SKP1 homolog)	SUGT1	1	6	21.9	41.024	0.86485	20.842	12	0.95262	16.872	12	3093	221
A0A087WZK9	Eukaryotic translation initiation factor 3 subunit H (eIF3h) (Eukaryotic translation initiation factor 3 subunit 3) (eIF-3 gamma) (eIF3 p40 subunit)	EIF3H	4	3	12	39.589	1.0931	16.623	12	0.9532	19.494	12	211	113966
P20674	Cytochrome c oxidase subunit 5A, mitochondrial (Cytochrome c oxidase polypeptide Va)	COX5A	4	5	26.7	16.762	0.86515	28.149	27	0.95341	19.159	27	806	68095
O76021	Ribosomal L1 domain-containing protein 1 (CATX-11) (Cellular senescence-inhibited gene protein) (Protein PBK1)	RSL1D1	5	15	29.6	54.972	0.98064	27.465	68	0.95354	25.883	68	386	23453
H7C0D5	Protein YIPF4 (Fragment)	YIPF4	2	1	15.5	6.447	1.0671	0.4495	2	0.9537	8.4856	2	2583	124968
P11498	Pyruvate carboxylase, mitochondrial (EC 6.4.1.1) (Pyruvic carboxylase) (PCB)	PC	3	31	35.4	129.63	0.85756	32.927	111	0.95407	20.603	111	677	4541
Q9H2M9	Rab3 GTPase-activating protein non-catalytic subunit (RGAP-iso) (Rab3 GTPase-activating protein 150 kDa subunit) (Rab3-GAP p150) (Rab3-GAP150) (Rab3-GAP regulatory subunit)	RAB3GAP2	1	2	1.5	155.98	1.148	14.37	5	0.95441	13.54	5	2693	108106
P07384	Calpain-1 catalytic subunit (EC 3.4.22.52) (Calcium-activated neutral proteinase 1) (CANP 1) (Calpain mu-type) (Calpain-1 large subunit) (Cell proliferation-inducing gene 30 protein) (Micromolar-calpain) (muCANP)	CAPN1	10	7	12.5	81.889	1.1422	20.958	14	0.95445	24.95	14	585	30831
Q9NY33	Dipeptidyl peptidase 3 (EC 3.4.14.4) (Dipeptidyl aminopeptidase III) (Dipeptidyl arylamidase III) (Dipeptidyl peptidase III) (DPP III) (Enkephalinase B)	DPP3	8	8	15.9	82.588	0.89916	25.577	23	0.95469	21.809	23	2888	5536
H3BQQ9	SUMO-conjugating enzyme UBC9 (Fragment)	UBE2I	5	5	45.3	15.516	1.0052	49.354	15	0.95492	23.551	15	1435	74389
P20618	Proteasome subunit beta type-1 (EC 3.4.25.1) (Macropain subunit C5) (Multicatalytic endopeptidase complex subunit C5) (Proteasome component C5) (Proteasome gamma chain)	PSMB1	1	7	38.6	26.489	0.9669	45.954	40	0.95506	44.91	40	803	8269
P53634	Dipeptidyl peptidase 1 (EC 3.4.14.1) (Cathepsin C) (Cathepsin J) (Dipeptidyl peptidase I) (DPP-I) (DPPI) (Dipeptidyl transferase) [Cleaved into: Dipeptidyl peptidase 1 exclusion domain chain (Dipeptidyl peptidase I exclusion domain chain); Dipeptidyl peptidase 1 heavy chain (Dipeptidyl peptidase I heavy chain); Dipeptidyl peptidase 1 light chain (Dipeptidyl peptidase I light chain)]	CTSC	2	4	13.6	51.853	1.1271	28.471	11	0.95518	20.668	11	1255	152046
A0A2R8YEX5	Acetyl-coenzyme A transporter 1	SLC33A1	7	1	5.3	29.349	1.3293	16.635	2	0.95522	8.976	2	126	41215
Q02809	Procollagen-lysine,2-oxoglutarate 5-dioxygenase 1 (EC 1.14.11.4) (Lysyl hydroxylase 1) (LH1)	PLOD1	3	6	12.9	83.549	0.72027	25.399	7	0.95548	19.038	7	1528	19892
K7ELL7	Glucosidase 2 subunit beta (Glucosidase II subunit beta)	PRKCSH	6	17	51	60.192	0.89255	22.365	54	0.95571	22.846	55	3273	19658
A0A2U3TZN1	HCG2040106 (Signal recognition particle 19 kDa protein)	SRP19	6	2	36.6	11.509	1.0835	34.981	3	0.95595	24.399	3	622	24866
Q96KP4	Cytosolic non-specific dipeptidase (EC 3.4.13.18) (CNDP dipeptidase 2) (Carnosine dipeptidase II) (Epididymis secretory protein Li 13) (Glutamate carboxypeptidase-like protein 1) (Peptidase A)	CNDP2	16	12	35.6	52.878	0.90496	26.644	47	0.95654	27.905	47	2455	2027
P48507	Glutamate--cysteine ligase regulatory subunit (GCS light chain) (Gamma-ECS regulatory subunit) (Gamma-glutamylcysteine synthetase regulatory subunit) (Glutamate--cysteine ligase modifier subunit)	GCLM	1	3	16.1	30.727	0.98288	21.65	7	0.95667	12.404	7	1134	43968
P11233	Ras-related protein Ral-A (EC 3.6.5.2)	RALA	8	4	22.8	23.567	1.1594	27.789	6	0.95675	26.476	6	671	6611
Q13813	Spectrin alpha chain, non-erythrocytic 1 (Alpha-II spectrin) (Fodrin alpha chain) (Spectrin, non-erythroid alpha subunit)	SPTAN1	1	65	33.9	284.54	0.94846	28.066	168	0.957	22.059	168	1683	5637
Q96A35	39S ribosomal protein L24, mitochondrial (L24mt) (MRP-L24) (Mitochondrial large ribosomal subunit protein uL24m)	MRPL24	2	4	27.3	24.915	0.82853	16.236	5	0.95704	31.318	5	2369	4648
P49257	Protein ERGIC-53 (ER-Golgi intermediate compartment 53 kDa protein) (Gp58) (Intracellular mannose-specific lectin MR60) (Lectin mannose-binding 1)	LMAN1	1	10	32.7	57.548	0.87566	47.252	25	0.95804	50.003	24	1147	32551
O76031	ATP-dependent Clp protease ATP-binding subunit clpX-like, mitochondrial	CLPX	2	9	19.9	69.223	0.90027	21.101	14	0.95882	30.139	14	388	19660
E5RFX7	Pyridoxal phosphate homeostasis protein (Fragment)	PLPBP	4	3	29.9	15.34	0.87731	11.18	3	0.95914	17.055	3	404	107463
Q8WVM8	Sec1 family domain-containing protein 1 (SLY1 homolog) (Sly1p) (Syntaxin-binding protein 1-like 2)	SCFD1	8	12	29.8	72.379	1.0722	20.506	48	0.95923	34.172	48	2275	199
A0A2U3TZY2	Caseinolytic peptidase B protein homolog	CLPB	7	4	9.4	76.852	1.0577	13.351	3	0.95954	29.29	3	2676	47488
P31150	Rab GDP dissociation inhibitor alpha (Rab GDI alpha) (Guanosine diphosphate dissociation inhibitor 1) (GDI-1) (Oligophrenin-2) (Protein XAP-4)	GDI1	2	11	32.7	50.582	0.80891	35.524	3	0.95966	58.427	3	953	39781
P30084	Enoyl-CoA hydratase, mitochondrial (EC 4.2.1.17) (Enoyl-CoA hydratase 1) (Short-chain enoyl-CoA hydratase) (SCEH)	ECHS1	1	10	36.2	31.387	1.1338	34.958	59	0.95991	24.904	59	933	6815
Q9UNF0	Protein kinase C and casein kinase substrate in neurons protein 2 (Syndapin-2) (Syndapin-II) (SdpII)	PACSIN2	4	6	16.5	55.738	0.82911	7.6364	3	0.96002	19.098	3	3034	5343
F5H1S8	Malectin (Fragment)	MLEC	4	4	28.1	16.729	1.04	35.614	14	0.96031	40.682	14	1708	33817
P35270	Sepiapterin reductase (SPR) (EC 1.1.1.153)	SPR	1	4	23.8	28.048	1.0686	32.896	10	0.96047	31.883	10	1000	24149
P31939	Bifunctional purine biosynthesis protein ATIC (AICAR transformylase/inosine monophosphate cyclohydrolase) (ATIC) [Cleaved into: Bifunctional purine biosynthesis protein ATIC, N-terminally processed] [Includes: Phosphoribosylaminoimidazolecarboxamide formyltransferase (EC 2.1.2.3) (5-aminoimidazole-4-carboxamide ribonucleotide formyltransferase) (AICAR formyltransferase) (AICAR transformylase); In…	ATIC	4	30	61.7	64.615	1.028	30.041	155	0.96102	29.88	155	961	6123
Q9BVC6	Transmembrane protein 109 (Mitsugumin-23) (Mg23)	TMEM109	1	1	4.9	26.21	0.67583	26.211	6	0.96117	6.007	6	2611	41694
P22695	Cytochrome b-c1 complex subunit 2, mitochondrial (Complex III subunit 2) (Core protein II) (Ubiquinol-cytochrome-c reductase complex core protein 2)	UQCRC2	7	16	40.4	48.442	0.97887	30.271	52	0.96131	25.87	52	838	21989
A0A140T955	HLA class I histocompatibility antigen, A alpha chain	HLA-A	19	3	16.7	34.288	1.1732	22.847	6	0.96244	19.316	6	507	31809
E9PFR3	Serine/threonine-protein phosphatase 2A 56 kDa regulatory subunit	PPP2R5D	8	6	12	69.116	1.1243	73.142	6	0.96258	83.221	6	1744	18239
Q9ULW3	Activator of basal transcription 1 (hABT1) (Basal transcriptional activator)	ABT1	1	2	11.4	31.079	0.76597	14.856	2	0.96294	7.6633	2	3022	84501
Q9NTZ6	RNA-binding protein 12 (RNA-binding motif protein 12) (SH3/WW domain anchor protein in the nucleus) (SWAN)	RBM12	4	6	7.8	97.394	0.98361	32.557	5	0.96312	22.621	5	2834	48609
P55735	Protein SEC13 homolog (GATOR complex protein SEC13) (SEC13-like protein 1) (SEC13-related protein)	SEC13	2	5	34.5	35.54	0.8758	19.291	26	0.96314	12.021	26	1287	38670
A0A087WUT6	Eukaryotic translation initiation factor 5B (Translation initiation factor IF-2)	EIF5B	2	14	14.9	138.68	1.2168	54.824	18	0.96331	32.963	18	310	17857
Q9BYG3	MKI67 FHA domain-interacting nucleolar phosphoprotein (Nucleolar phosphoprotein Nopp34) (Nucleolar protein interacting with the FHA domain of pKI-67) (hNIFK)	NIFK	4	6	33.8	34.222	0.96233	20.131	9	0.96416	29.942	9	2647	22895
P36578	60S ribosomal protein L4 (60S ribosomal protein L1) (Large ribosomal subunit protein uL4)	RPL4	4	26	50.4	47.697	1.0422	48.595	118	0.96426	29.008	118	1020	77
P61026	Ras-related protein Rab-10 (EC 3.6.5.2)	RAB10	3	4	26.5	22.541	0.62586	40.738	3	0.96432	28.817	3	1325	7314
Q9BY32	Inosine triphosphate pyrophosphatase (ITPase) (Inosine triphosphatase) (EC 3.6.1.9) (Non-canonical purine NTP pyrophosphatase) (Non-standard purine NTP pyrophosphatase) (Nucleoside-triphosphate diphosphatase) (Nucleoside-triphosphate pyrophosphatase) (NTPase) (Putative oncogene protein hlc14-06-p)	ITPA	1	3	17	21.445	1.0704	20.482	9	0.96448	11.819	9	2635	2645
P27144	Adenylate kinase 4, mitochondrial (AK 4) (EC 2.7.4.10) (EC 2.7.4.6) (Adenylate kinase 3-like) (GTP:AMP phosphotransferase AK4)	AK4	2	7	46.2	25.268	1.1033	24.267	36	0.96475	28.062	36	889	25618
P39019	40S ribosomal protein S19 (Small ribosomal subunit protein eS19)	RPS19	6	10	55.9	16.06	1.2508	27.994	69	0.96496	38.332	69	1041	12393
A0A3B3ITL5	Male-specific lethal 3 homolog (Fragment)	MSL3	7	2	3.3	55.747	1.0405	52.579	5	0.96528	32.205	5	2172	125767
O60763	General vesicular transport factor p115 (Protein USO1 homolog) (Transcytosis-associated protein) (TAP) (Vesicle-docking protein)	USO1	2	15	25.1	107.89	1.1429	31.284	28	0.96538	15.827	28	302	28196
H0YMC9	Vacuolar protein sorting-associated protein 18 homolog	VPS18	3	1	10.7	13.133	1.0683	18.233	2	0.96544	1.0911	2	2926	21026
A0A1X7SBZ2	RNA helicase (EC 3.6.4.13)	DDX17	4	22	37.9	80.253	1.0869	30.012	78	0.96578	26.574	77	2331	17864
O15067	Phosphoribosylformylglycinamidine synthase (FGAM synthase) (FGAMS) (EC 6.3.5.3) (Formylglycinamide ribonucleotide amidotransferase) (FGAR amidotransferase) (FGAR-AT) (Formylglycinamide ribotide amidotransferase)	PFAS	6	15	17.6	144.73	0.91225	35.051	23	0.96612	27.391	24	187	7530
Q9H832	Ubiquitin-conjugating enzyme E2 Z (EC 2.3.2.23) (E2 ubiquitin-conjugating enzyme Z) (Uba6-specific E2 conjugating enzyme 1) (Use1) (Ubiquitin carrier protein Z) (Ubiquitin-protein ligase Z)	UBE2Z	3	2	9.6	38.21	1.0317	17.626	2	0.96625	17.609	2	2731	32808
Q92973	Transportin-1 (Importin beta-2) (Karyopherin beta-2) (M9 region interaction protein) (MIP)	TNPO1	5	9	14.1	102.35	0.90673	26.06	13	0.96635	32.46	13	2345	59943
P30101	Protein disulfide-isomerase A3 (EC 5.3.4.1) (58 kDa glucose-regulated protein) (58 kDa microsomal protein) (p58) (Disulfide isomerase ER-60) (Endoplasmic reticulum resident protein 57) (ER protein 57) (ERp57) (Endoplasmic reticulum resident protein 60) (ER protein 60) (ERp60)	PDIA3	1	30	52.3	56.782	0.81384	41.864	225	0.96642	23.559	225	936	37049
P23528	Cofilin-1 (18 kDa phosphoprotein) (p18) (Cofilin, non-muscle isoform)	CFL1	7	12	69.9	18.502	0.96994	41.193	69	0.96688	30.9	69	854	20917
P61158	Actin-related protein 3 (Actin-like protein 3)	ACTR3	6	11	39.7	47.371	0.96968	45.234	15	0.9669	31.594	15	1331	6475
O00264	Membrane-associated progesterone receptor component 1 (mPR) (Dap1) (IZA)	PGRMC1	1	4	20	21.671	0.93973	20.642	10	0.967	17.011	10	119	31400
Q9Y490	Talin-1	TLN1	3	37	26.1	269.76	0.74604	24.655	89	0.96711	18.646	88	3134	15071
E7EQ72	Transmembrane emp24 domain-containing protein 2 (Fragment)	TMED2	3	3	22.3	18.488	2.1026	16.714	5	0.96712	20.665	5	1798	77199
P30048	Thioredoxin-dependent peroxide reductase, mitochondrial (EC 1.11.1.24) (Antioxidant protein 1) (AOP-1) (HBC189) (Peroxiredoxin III) (Prx-III) (Peroxiredoxin-3) (Protein MER5 homolog) (Thioredoxin-dependent peroxiredoxin 3)	PRDX3	1	8	40.6	27.692	1.4123	47.132	38	0.96723	28.205	38	930	7418
Q9UM22	Mammalian ependymin-related protein 1 (MERP-1) (Upregulated in colorectal cancer gene 1 protein)	EPDR1	1	1	4.9	25.437	0.88767	2.9138	2	0.96726	14.753	2	3026	14273
A0A087WXM6	60S ribosomal protein L17 (Fragment)	RPL17	12	6	41.4	19.586	0.85788	51.774	12	0.96745	27.606	12	780	49611
Q9H3P7	Golgi resident protein GCP60 (Acyl-CoA-binding domain-containing protein 3) (Golgi complex-associated protein 1) (GOCAP1) (Golgi phosphoprotein 1) (GOLPH1) (PBR- and PKA-associated protein 7) (Peripheral benzodiazepine receptor-associated protein PAP7) [Cleaved into: Golgi resident protein GCP60, N-terminally processed]	ACBD3	1	6	18.2	60.593	1.1699	33.892	3	0.96784	18.518	3	2707	3133
H7C1W2	Isocitrate dehydrogenase [NAD] subunit gamma, mitochondrial (Fragment)	IDH3G	5	1	11.6	22.384	0.92015	5.033	2	0.96804	0.58384	2	1205	49143
Q5T6F2	Ubiquitin-associated protein 2 (UBAP-2)	UBAP2	2	3	5.9	117.11	0.84841	18.016	6	0.96807	26.277	6	1938	95801
Q14974	Importin subunit beta-1 (Importin-90) (Karyopherin subunit beta-1) (Nuclear factor p97) (Pore targeting complex 97 kDa subunit) (PTAC97)	KPNB1	6	16	24.4	97.169	0.90258	17.765	56	0.96811	23.062	56	1752	3069
P28331	NADH-ubiquinone oxidoreductase 75 kDa subunit, mitochondrial (EC 7.1.1.2) (Complex I-75kD) (CI-75kD)	NDUFS1	3	17	34.7	79.467	0.96934	28.403	50	0.96814	19.131	50	907	14966
P21796	Voltage-dependent anion-selective channel protein 1 (VDAC-1) (hVDAC1) (Outer mitochondrial membrane protein porin 1) (Plasmalemmal porin) (Porin 31HL) (Porin 31HM)	VDAC1	2	20	73.9	30.772	1.0559	42.684	111	0.96814	27.004	111	822	26086
C4P0D4	Disrupted in schizophrenia 1 isoform 47 (Disrupted in schizophrenia 1 isoform 48) (Disrupted in schizophrenia 1 isoform 53) (TSNAX-DISC1 readthrough (NMD candidate))	TSNAX-DISC1	6	3	25.4	16.111	0.9637	35.385	3	0.96843	28.302	3	2518	39176
O00487	26S proteasome non-ATPase regulatory subunit 14 (EC 3.4.19.-) (26S proteasome regulatory subunit RPN11) (26S proteasome-associated PAD1 homolog 1)	PSMD14	1	5	24.8	34.577	1.1139	36.817	12	0.96853	34.101	12	136	24146
P00403	Cytochrome c oxidase subunit 2 (EC 7.1.1.9) (Cytochrome c oxidase polypeptide II)	MT-CO2	1	4	23.3	25.565	0.81612	51.963	33	0.96854	20.449	33	486	92954
P55060	Exportin-2 (Exp2) (Cellular apoptosis susceptibility protein) (Chromosome segregation 1-like protein) (Importin-alpha re-exporter)	CSE1L	1	22	25.3	110.42	0.96085	43.196	86	0.96855	28.315	86	1278	852
O14745	Na(+)/H(+) exchange regulatory cofactor NHE-RF1 (NHERF-1) (Ezrin-radixin-moesin-binding phosphoprotein 50) (EBP50) (Regulatory cofactor of Na(+)/H(+) exchanger) (Sodium-hydrogen exchanger regulatory factor 1) (Solute carrier family 9 isoform A3 regulatory factor 1)	SLC9A3R1	2	13	52.2	38.868	0.78929	55.641	35	0.96859	29.529	35	164	19007
Q92520	Protein FAM3C (Interleukin-like EMT inducer)	FAM3C	3	2	12.8	24.68	1.1734	30.729	4	0.969	55.874	4	2295	82107
P38606	V-type proton ATPase catalytic subunit A (V-ATPase subunit A) (EC 7.1.2.2) (V-ATPase 69 kDa subunit) (Vacuolar ATPase isoform VA68) (Vacuolar proton pump subunit alpha)	ATP6V1A	3	6	17.2	68.303	1.0685	17.629	20	0.96965	21.722	20	1038	107634
Q9UNE7	E3 ubiquitin-protein ligase CHIP (EC 2.3.2.27) (Antigen NY-CO-7) (CLL-associated antigen KW-8) (Carboxy terminus of Hsp70-interacting protein) (RING-type E3 ubiquitin transferase CHIP) (STIP1 homology and U box-containing protein 1)	STUB1	4	2	8.9	34.856	0.59034	18.366	2	0.96984	23.279	2	3033	124688
P51665	26S proteasome non-ATPase regulatory subunit 7 (26S proteasome regulatory subunit RPN8) (26S proteasome regulatory subunit S12) (Mov34 protein homolog) (Proteasome subunit p40)	PSMD7	3	6	21	37.025	0.90242	53.7	8	0.96985	34.565	8	1214	32741
O00203	AP-3 complex subunit beta-1 (Adaptor protein complex AP-3 subunit beta-1) (Adaptor-related protein complex 3 subunit beta-1) (Beta-3A-adaptin) (Clathrin assembly protein complex 3 beta-1 large chain)	AP3B1	4	6	9.3	121.32	1.0047	28.908	13	0.97	17.261	13	113	100726
M0R299	rRNA 2'-O-methyltransferase fibrillarin (Fragment)	FBL	8	9	44.5	25.308	0.943	31.916	25	0.97022	24.796	25	830	16786
Q96JH7	Deubiquitinating protein VCIP135 (EC 3.4.19.12) (Valosin-containing protein p97/p47 complex-interacting protein 1) (Valosin-containing protein p97/p47 complex-interacting protein p135) (VCP/p47 complex-interacting 135-kDa protein)	VCPIP1	1	2	2.3	134.32	1.508	10.57	3	0.97022	11.067	3	2450	182457
O43865	S-adenosylhomocysteine hydrolase-like protein 1 (DC-expressed AHCY-like molecule) (IP(3)Rs binding protein released with IP(3)) (IRBIT) (Putative adenosylhomocysteinase 2) (S-adenosyl-L-homocysteine hydrolase 2) (AdoHcyase 2)	AHCYL1	3	3	9.6	58.951	1.1307	12.727	3	0.9704	13.48	3	271	110661
Q15181	Inorganic pyrophosphatase (EC 3.6.1.1) (Pyrophosphate phospho-hydrolase) (PPase)	PPA1	2	11	43.9	32.66	0.94878	30.489	47	0.97042	25.058	47	1785	2240
P49189	4-trimethylaminobutyraldehyde dehydrogenase (TMABA-DH) (TMABALDH) (EC 1.2.1.47) (Aldehyde dehydrogenase E3 isozyme) (Aldehyde dehydrogenase family 9 member A1) (EC 1.2.1.3) (Gamma-aminobutyraldehyde dehydrogenase) (EC 1.2.1.19) (R-aminobutyraldehyde dehydrogenase) [Cleaved into: 4-trimethylaminobutyraldehyde dehydrogenase, N-terminally processed]	ALDH9A1	1	11	27.7	53.801	1.0941	21.446	19	0.97068	25.286	19	1144	16826
Q96EK6	Glucosamine 6-phosphate N-acetyltransferase (EC 2.3.1.4) (Phosphoglucosamine acetylase) (Phosphoglucosamine transacetylase)	GNPNAT1	3	3	25.5	20.749	1.2152	17.983	11	0.97101	34.291	11	2402	99202
Q6P1L8	39S ribosomal protein L14, mitochondrial (L14mt) (MRP-L14) (39S ribosomal protein L32, mitochondrial) (L32mt) (MRP-L32) (Mitochondrial large ribosomal subunit protein uL14m)	MRPL14	1	3	29	15.947	1.0463	9.3103	3	0.97105	1.5724	3	1990	54067
Q8TEX9	Importin-4 (Imp4) (Importin-4b) (Imp4b) (Ran-binding protein 4) (RanBP4)	IPO4	8	12	14.4	118.71	0.80903	19.656	35	0.97155	16.215	35	2258	1516
F6RWC2	Epimerase family protein SDR39U1	SDR39U1	5	2	25.6	22.44	1.3776	38.954	2	0.97156	39.085	2	3250	187446
Q6NUQ4	Transmembrane protein 214	TMEM214	4	5	8.3	77.15	1.2536	36.23	5	0.97166	46.028	5	1985	121700
Q9HB66	Alternative protein MKKS (McKusick-Kaufman syndrome, isoform CRA_a) (PNAS-117)	MKKS	1	2	41.3	7.2634	0.86014	3.0949	7	0.97195	10.526	7	3282	146942
B9A067	MICOS complex subunit MIC60 (Mitofilin)	IMMT	6	14	29.3	78.973	0.9554	23.097	40	0.97206	57.679	40	1876	16802
A0MZ66	Shootin-1 (Shootin1)	SHTN1	1	3	7.1	71.639	0.89081	49.88	2	0.97332	29.665	2	81	171916
P48444	Coatomer subunit delta (Archain) (Delta-coat protein) (Delta-COP)	ARCN1	4	14	32.9	57.21	1.1575	42.872	30	0.97429	23.752	30	1131	17644
P50454	Serpin H1 (47 kDa heat shock protein) (Arsenic-transactivated protein 3) (AsTP3) (Cell proliferation-inducing gene 14 protein) (Collagen-binding protein) (Colligin) (Rheumatoid arthritis-related antigen RA-A47)	SERPINH1	13	14	33	46.44	0.89556	51.42	49	0.97432	33.458	50	1185	24018
P35237	Serpin B6 (Cytoplasmic antiproteinase) (CAP) (Peptidase inhibitor 6) (PI-6) (Placental thrombin inhibitor)	SERPINB6	7	7	25.3	42.621	0.73934	26.617	18	0.97442	20.511	18	992	4619
Q9H0U4	Ras-related protein Rab-1B	RAB1B	3	7	38.3	22.171	0.94159	12.904	31	0.97501	10.835	31	2684	43792
Q8NBJ5	Procollagen galactosyltransferase 1 (EC 2.4.1.50) (Collagen beta(1-O)galactosyltransferase 1) (ColGalT 1) (Glycosyltransferase 25 family member 1) (Hydroxylysine galactosyltransferase 1)	COLGALT1	3	6	9.8	71.635	0.82692	15.095	14	0.97534	52.652	14	2187	14674
Q9NZJ7	Mitochondrial carrier homolog 1 (Presenilin-associated protein)	MTCH1	2	1	2.8	41.544	0.80791	19.592	6	0.97559	20.258	6	2908	124125
P22307	Non-specific lipid-transfer protein (NSL-TP) (EC 2.3.1.176) (Propanoyl-CoA C-acyltransferase) (SCP-chi) (SCPX) (Sterol carrier protein 2) (SCP-2) (Sterol carrier protein X) (SCP-X)	SCP2	4	12	26.3	58.993	0.96344	20.564	27	0.9757	28.046	26	833	4265
E9PMI6	Chloride channel, nucleotide sensitive 1A (Chloride conductance regulatory protein ICln) (Methylosome subunit pICln)	CLNS1A	4	3	37.7	18.259	1.4089	24.449	3	0.97578	37.349	3	1263	69738
Q15050	Ribosome biogenesis regulatory protein homolog	RRS1	1	4	16.7	41.193	0.77731	18.607	9	0.97582	16.798	9	1772	27124
A0A087WV57	Protein kinase C-binding protein 1	ZMYND8	5	2	5	85.629	0.72135	13.337	2	0.97599	2.5973	2	3020	92026
H0YCR5	2-(3-amino-3-carboxypropyl)histidine synthase subunit 2 (Diphthamide biosynthesis protein 2) (Diphtheria toxin resistance protein 2) (Fragment)	DPH2	2	1	5.7	27.845	1.0756	17.145	2	0.97606	22.819	2	2557	223439
Q14690	Protein RRP5 homolog (NF-kappa-B-binding protein) (NFBP) (Programmed cell death protein 11)	PDCD11	3	15	10.6	208.7	0.81994	20.903	28	0.97622	20.646	28	1738	7299
P25205	DNA replication licensing factor MCM3 (EC 3.6.4.12) (DNA polymerase alpha holoenzyme-associated protein P1) (P1-MCM3) (RLF subunit beta) (p102)	MCM3	3	10	20	90.98	1.0293	40.588	18	0.97646	21.458	18	865	9350
P62273	40S ribosomal protein S29 (Small ribosomal subunit protein uS14)	RPS29	4	3	46.4	6.6767	0.88966	26.002	10	0.9765	41.819	10	1377	32665
C9JJV1	Protein TSSC4 (Fragment)	TSSC4	2	1	3.9	21.908	0.99593	22.735	3	0.97707	6.8842	3	3166	207879
Q9HD45	Transmembrane 9 superfamily member 3 (EP70-P-iso) (SM-11044-binding protein)	TM9SF3	2	5	7.6	67.887	1.1411	22.137	13	0.97717	16.469	13	2771	150515
Q96CS3	FAS-associated factor 2 (Protein ETEA) (UBX domain-containing protein 3B) (UBX domain-containing protein 8)	FAF2	1	4	15.7	52.623	0.95821	46.575	5	0.97738	12.955	5	2391	9800
Q7Z406	Myosin-14 (Myosin heavy chain 14) (Myosin heavy chain, non-muscle IIc) (Non-muscle myosin heavy chain IIc) (NMHC II-C)	MYH14	3	10	5.7	227.87	1.1452	27.553	5	0.97889	39.051	5	2062	42687
P18859	ATP synthase-coupling factor 6, mitochondrial (ATPase subunit F6) (ATP synthase peripheral stalk subunit F6)	ATP5PF	2	3	44.4	12.587	0.98244	11.035	30	0.97982	14.268	30	784	54332
Q969X6	U3 small nucleolar RNA-associated protein 4 homolog (Cirhin) (UTP4 small subunit processome component)	UTP4	5	2	3.9	76.889	1.3111	15.935	2	0.97998	0.66558	2	2365	54827
Q9Y6A9	Signal peptidase complex subunit 1 (EC 3.4.-.-) (Microsomal signal peptidase 12 kDa subunit) (SPase 12 kDa subunit)	SPCS1	1	1	14.7	11.805	0.86753	14.461	6	0.98041	10.529	6	3181	141712
O00330	Pyruvate dehydrogenase protein X component, mitochondrial (Dihydrolipoamide dehydrogenase-binding protein of pyruvate dehydrogenase complex) (E3-binding protein) (E3BP) (Lipoyl-containing pyruvate dehydrogenase complex component X) (proX)	PDHX	4	6	16.8	54.122	1.0021	22.445	11	0.98042	19.641	11	125	68217
O15145	Actin-related protein 2/3 complex subunit 3 (Arp2/3 complex 21 kDa subunit) (p21-ARC)	ARPC3	3	4	24.7	20.546	1.0465	18.002	10	0.98045	21.255	10	195	26912
Q92616	eIF-2-alpha kinase activator GCN1 (GCN1 eIF-2-alpha kinase activator homolog) (GCN1-like protein 1) (General control of amino-acid synthesis 1-like protein 1) (Translational activator GCN1) (HsGCN1)	GCN1	1	31	15.7	292.75	0.93512	34.714	59	0.98049	24.955	58	2313	891
A0A2R8YD50	Peroxisomal multifunctional enzyme type 2	HSD17B4	12	16	34	76.837	1.2815	36.814	54	0.98141	24.218	54	1213	23679
Q5QPP4	UDP-glucose 4-epimerase (EC 5.1.3.2) (Fragment)	GALE	4	3	34.3	26.391	1.2123	13.529	4	0.98149	12.551	4	1721	41259
Q9Y3Z3	Deoxynucleoside triphosphate triphosphohydrolase SAMHD1 (dNTPase) (EC 3.1.5.-) (Dendritic cell-derived IFNG-induced protein) (DCIP) (Monocyte protein 5) (MOP-5) (SAM domain and HD domain-containing protein 1) (hSAMHD1)	SAMHD1	12	8	16.9	72.2	0.92075	35.117	14	0.98169	22.949	14	3131	49584
Q96BP3	Peptidylprolyl isomerase domain and WD repeat-containing protein 1 (EC 5.2.1.8) (Spliceosome-associated cyclophilin)	PPWD1	6	3	7.4	73.574	1.056	39.122	2	0.98215	52.281	2	2380	20480
Q13155	Aminoacyl tRNA synthase complex-interacting multifunctional protein 2 (Multisynthase complex auxiliary component p38) (Protein JTV-1)	AIMP2	2	4	20.9	35.348	1.2526	45.995	18	0.98233	25.381	18	1623	60109
Q92604	Acyl-CoA:lysophosphatidylglycerol acyltransferase 1 (EC 2.3.1.-)	LPGAT1	1	1	3	43.089	0.66702	9.8938	4	0.98245	17.876	4	2309	87940
P07814	Bifunctional glutamate/proline--tRNA ligase (Bifunctional aminoacyl-tRNA synthetase) (Cell proliferation-inducing gene 32 protein) (Glutamatyl-prolyl-tRNA synthetase) [Includes: Glutamate--tRNA ligase (EC 6.1.1.17) (Glutamyl-tRNA synthetase) (GluRS); Proline--tRNA ligase (EC 6.1.1.15) (Prolyl-tRNA synthetase)]	EPRS1	3	31	29.2	170.59	0.92116	29.466	66	0.98252	35.113	65	592	1853
Q96IJ6	Mannose-1-phosphate guanyltransferase alpha (GDP-mannose pyrophosphorylase A) (GMPP-alpha) (GTP-mannose-1-phosphate guanylyltransferase alpha)	GMPPA	3	2	6.2	46.291	0.8986	19.348	7	0.98263	18	7	2442	122375
D6RD69	GTP-binding protein SAR1b (Fragment)	SAR1B	4	3	18.2	19.047	1.1788	28.599	2	0.9828	32.666	2	3182	48566
O60220	Mitochondrial import inner membrane translocase subunit Tim8 A (Deafness dystonia protein 1) (X-linked deafness dystonia protein)	TIMM8A	2	3	52.6	10.998	1.2906	12.1	4	0.98282	21.15	4	276	56122
P31350	Ribonucleoside-diphosphate reductase subunit M2 (EC 1.17.4.1) (Ribonucleotide reductase small chain) (Ribonucleotide reductase small subunit)	RRM2	6	5	19.3	44.877	0.81303	41.229	3	0.98315	28.541	3	956	638
Q5TEC6	Histone H3	H3-2	1	5	25.7	15.43	1.2196	14.497	10	0.98315	12.521	10	3281	45198
B7Z6D5	RNA helicase (EC 3.6.4.13)	DDX27	4	8	12.3	86.604	0.93545	23.132	15	0.98361	23.591	15	2428	11592
A0A0B4J1R4	4-hydroxyphenylpyruvate dioxygenase	HPD	2	3	10.2	44.964	1.5328	50.933	3	0.98369	16.762	3	970	48898
Q14139	Ubiquitin conjugation factor E4 A (EC 2.3.2.27) (RING-type E3 ubiquitin transferase E4 A)	UBE4A	1	1	1.1	122.56	0.89612	22.611	3	0.9839	17.313	3	1700	123147
Q15746	Myosin light chain kinase, smooth muscle (MLCK) (smMLCK) (EC 2.7.11.18) (Kinase-related protein) (KRP) (Telokin) [Cleaved into: Myosin light chain kinase, smooth muscle, deglutamylated form]	MYLK	1	1	0.4	210.71	1.3064	11.762	4	0.98399	10.358	4	1827	117090
P22413	Ectonucleotide pyrophosphatase/phosphodiesterase family member 1 (E-NPP 1) (Membrane component chromosome 6 surface marker 1) (Phosphodiesterase I/nucleotide pyrophosphatase 1) (Plasma-cell membrane glycoprotein PC-1) [Cleaved into: Ectonucleotide pyrophosphatase/phosphodiesterase family member 1, secreted form] [Includes: Alkaline phosphodiesterase I (EC 3.1.4.1); Nucleotide pyrophosphatase (NPP…	ENPP1	3	4	6.4	104.92	0.63763	5.9613	2	0.98409	2.7	2	835	51891
Q8NE01	Metal transporter CNNM3 (Ancient conserved domain-containing protein 3) (Cyclin-M3)	CNNM3	1	3	5.5	76.118	1.2405	51.884	8	0.98411	40.737	8	2214	33672
A0A0G2JS82	AP-2 complex subunit alpha-2 (Fragment)	AP2A2	2	1	1.5	101.54	0.96171	7.0073	2	0.98422	12.159	2	410	159502
P04899	Guanine nucleotide-binding protein G(i) subunit alpha-2 (Adenylate cyclase-inhibiting G alpha protein)	GNAI2	1	5	23.9	40.45	1.0185	22.986	14	0.98427	26.317	14	542	46323
E9PCN4	Ellis-van Creveld syndrome protein	EVC	2	1	3	60	1.0615	8.3492	3	0.98445	3.9933	3	1300	155508
I3L2B0	Clustered mitochondria protein homolog	CLUH	4	11	12.2	138.23	0.92859	35.189	20	0.98466	34.519	20	321	20436
F5H365	Protein transport protein SEC23	SEC23A	9	18	32.3	82.968	1.1225	24.405	72	0.98504	27.528	71	1813	25909
P78417	Glutathione S-transferase omega-1 (GSTO-1) (EC 2.5.1.18) (Glutathione S-transferase omega 1-1) (GSTO 1-1) (Glutathione-dependent dehydroascorbate reductase) (EC 1.8.5.1) (Monomethylarsonic acid reductase) (MMA(V) reductase) (EC 1.20.4.2) (S-(Phenacyl)glutathione reductase) (SPG-R)	GSTO1	3	8	29.9	27.566	1.1298	49.769	17	0.98504	32.199	17	1463	44093
O95202	Mitochondrial proton/calcium exchanger protein (Leucine zipper-EF-hand-containing transmembrane protein 1)	LETM1	1	8	16.2	83.353	0.8385	18.753	12	0.98548	21.394	12	424	4316
P09110	3-ketoacyl-CoA thiolase, peroxisomal (EC 2.3.1.16) (Acetyl-CoA acyltransferase) (Beta-ketothiolase) (Peroxisomal 3-oxoacyl-CoA thiolase)	ACAA1	7	12	51.9	44.292	1.0588	21.605	43	0.98565	24.496	43	621	5858
Q9H3G5	Probable serine carboxypeptidase CPVL (EC 3.4.16.-) (Carboxypeptidase, vitellogenic-like) (Vitellogenic carboxypeptidase-like protein) (VCP-like protein) (hVLP)	CPVL	6	7	16.6	54.163	0.77618	23.72	14	0.98605	35.553	14	2701	28455
P51571	Translocon-associated protein subunit delta (TRAP-delta) (Signal sequence receptor subunit delta) (SSR-delta)	SSR4	2	5	36.4	18.998	1.1376	22.254	28	0.98672	28.461	28	1207	54613
P11166	Solute carrier family 2, facilitated glucose transporter member 1 (Glucose transporter type 1, erythrocyte/brain) (GLUT-1) (HepG2 glucose transporter)	SLC2A1	1	2	6.9	54.083	1.025	12.794	7	0.98675	21.691	7	666	157813
Q9ULC5	Long-chain-fatty-acid--CoA ligase 5 (EC 6.2.1.3) (Arachidonate--CoA ligase) (EC 6.2.1.15) (Long-chain acyl-CoA synthetase 5) (LACS 5)	ACSL5	4	15	29.6	75.99	0.98083	24.102	41	0.98678	21.503	41	3017	6812
P30740	Leukocyte elastase inhibitor (LEI) (Monocyte/neutrophil elastase inhibitor) (EI) (M/NEI) (Peptidase inhibitor 2) (PI-2) (Serpin B1)	SERPINB1	1	3	11.6	42.741	0.53473	35.218	8	0.98711	25.291	8	948	116514
Q9BTU6	Phosphatidylinositol 4-kinase type 2-alpha (EC 2.7.1.67) (Phosphatidylinositol 4-kinase type II-alpha)	PI4K2A	1	1	6.9	54.022	0.98913	15.308	2	0.9872	15.444	2	2594	62939
A0A1B0GWJ0	Adenylosuccinate lyase (ASL) (EC 4.3.2.2) (Adenylosuccinase)	ADSL	14	8	22.1	54.465	0.97659	65.312	14	0.98771	61.291	14	945	1232
P34932	Heat shock 70 kDa protein 4 (HSP70RY) (Heat shock 70-related protein APG-2)	HSPA4	3	25	44.2	94.33	1.0045	27.525	79	0.98856	25.977	79	986	7512
O75937	DnaJ homolog subfamily C member 8 (Splicing protein spf31)	DNAJC8	1	2	9.5	29.841	0.75108	29.722	2	0.98862	7.588	2	379	44537
C9JTS3	Angio-associated migratory cell protein (Fragment)	AAMP	4	2	12	21.992	0.92742	8.2832	3	0.98864	31.688	3	1679	26503
P37108	Signal recognition particle 14 kDa protein (SRP14) (18 kDa Alu RNA-binding protein)	SRP14	2	3	27.2	14.57	1.0949	76.08	8	0.98878	20.354	8	1028	59547
Q9H4A6	Golgi phosphoprotein 3 (Coat protein GPP34) (Mitochondrial DNA absence factor) (MIDAS)	GOLPH3	1	2	9.4	33.81	0.88023	7.2614	4	0.98897	22.541	4	2716	159274
A0A087WXC5	NADH dehydrogenase [ubiquinone] 1 alpha subcomplex subunit 10, mitochondrial	NDUFA10	8	4	9.3	40.836	1.0117	21.079	8	0.98905	7.9284	8	430	99708
M0QYT0	RRM domain-containing protein (Fragment)	0	4	12	46.7	35.904	1.0631	7.6932	5	0.98905	19.684	5	3275	11725
C9JA28	Signal sequence receptor subunit gamma (Translocon-associated protein subunit gamma)	SSR3	2	1	8	20.161	0.99929	5.7009	10	0.98919	5.8839	10	3037	160415
E7EM64	COP9 signalosome complex subunit 6	COPS6	3	2	10.7	36.064	0.95215	33.466	3	0.9892	42.946	3	2047	144544
P23588	Eukaryotic translation initiation factor 4B (eIF-4B)	EIF4B	3	4	10.1	69.15	1.1292	37.743	13	0.98989	10.811	13	855	2605
Q7KZF4	Staphylococcal nuclease domain-containing protein 1 (EC 3.1.31.1) (100 kDa coactivator) (EBNA2 coactivator p100) (Tudor domain-containing protein 11) (p100 co-activator)	SND1	2	26	34.6	102	0.96547	31.722	79	0.9899	26.286	79	2036	706
P82675	28S ribosomal protein S5, mitochondrial (MRP-S5) (S5mt) (Mitochondrial small ribosomal subunit protein uS5m)	MRPS5	1	4	13.5	48.006	1.1807	41.867	4	0.99025	38.077	4	1475	36933
Q9BRQ8	Ferroptosis suppressor protein 1 (FSP1) (EC 1.6.5.-) (Apoptosis-inducing factor homologous mitochondrion-associated inducer of death) (AMID) (p53-responsive gene 3 protein)	AIFM2	1	3	11.5	40.526	1.3928	38.369	2	0.99049	27.277	2	2571	37649
Q9HC52	Chromobox protein homolog 8 (Polycomb 3 homolog) (Pc3) (hPc3) (Rectachrome 1)	CBX8	3	2	4.6	43.395	1.0519	3.5915	2	0.99091	4.7905	2	2758	139521
O76003	Glutaredoxin-3 (PKC-interacting cousin of thioredoxin) (PICOT) (PKC-theta-interacting protein) (PKCq-interacting protein) (Thioredoxin-like protein 2)	GLRX3	1	8	26.6	37.432	0.92023	26.161	22	0.99098	21.351	22	385	26956
B7ZKQ9	SCARB1 protein (Scavenger receptor class B member 1)	SCARB1	4	3	8.7	53.847	0.89339	13.3	7	0.99114	17.239	7	3230	33427
E9PCG9	D-beta-hydroxybutyrate dehydrogenase, mitochondrial	BDH1	7	4	28.9	29.012	0.98038	28.799	9	0.99135	28.913	9	1524	139957
F8VWL0	Alpha-globin transcription factor CP2 (Fragment)	TFCP2	2	1	3.1	43.933	1.0487	0.80671	2	0.9916	3.7525	2	1594	114502
C9IZ01	Elongation factor G, mitochondrial	GFM1	3	5	12	66.034	0.94913	14.512	7	0.99189	19.642	7	2484	95657
H3BRL3	Ubiquitin domain-containing protein UBFD1	UBFD1	3	6	32.3	32.64	1.1346	21.422	6	0.992	16.999	6	154	59222
E5RFP0	NudC domain-containing protein 2	NUDCD2	2	3	28.8	14.745	0.88479	13.43	2	0.99201	66.341	2	2273	18974
Q13740	CD166 antigen (Activated leukocyte cell adhesion molecule) (CD antigen CD166)	ALCAM	3	4	12.7	65.102	0.99868	16.434	6	0.99215	23.519	6	1681	48540
Q9Y2T2	AP-3 complex subunit mu-1 (AP-3 adaptor complex mu3A subunit) (Adaptor-related protein complex 3 subunit mu-1) (Mu-adaptin 3A) (Mu3A-adaptin)	AP3M1	1	5	22.7	46.939	1.0392	49.916	4	0.99239	14.281	4	3086	70620
A0A2R8Y804	Catenin beta-1	CTNNB1	15	16	29.2	77.206	1.0451	26.796	51	0.99276	25.397	51	990	2081
G3V0I5	NADH dehydrogenase [ubiquinone] flavoprotein 1, mitochondrial (EC 7.1.1.2)	NDUFV1	12	9	30.6	50.054	1.2514	29.06	10	0.99301	22.694	10	1172	63225
Q9BXP5	Serrate RNA effector molecule homolog (Arsenite-resistance protein 2)	SRRT	3	8	11.2	100.67	1.1695	22.827	12	0.99306	28.997	12	2631	33789
Q9Y383	Putative RNA-binding protein Luc7-like 2	LUC7L2	6	4	13.8	46.513	0.97222	16.17	11	0.99324	14.94	11	3103	16604
Q9UBS4	DnaJ homolog subfamily B member 11 (APOBEC1-binding protein 2) (ABBP-2) (DnaJ protein homolog 9) (ER-associated DNAJ) (ER-associated Hsp40 co-chaperone) (Endoplasmic reticulum DNA J domain-containing protein 3) (ER-resident protein ERdj3) (ERdj3) (ERj3p) (HEDJ) (Human DnaJ protein 9) (hDj-9) (PWP1-interacting protein 4)	DNAJB11	2	7	27.7	40.513	1.009	14.512	16	0.99341	16.143	16	2946	31993
P00738	Haptoglobin (Zonulin) [Cleaved into: Haptoglobin alpha chain; Haptoglobin beta chain]	HP	13	7	22.4	45.205	0.80043	32.491	15	0.99345	18.323	15	496	91254
Q9UI09	NADH dehydrogenase [ubiquinone] 1 alpha subcomplex subunit 12 (13 kDa differentiation-associated protein) (Complex I-B17.2) (CI-B17.2) (CIB17.2) (NADH-ubiquinone oxidoreductase subunit B17.2)	NDUFA12	3	4	30.3	17.114	1.6163	27.873	14	0.99395	21.652	14	2980	58867
P02545	Prelamin-A/C [Cleaved into: Lamin-A/C (70 kDa lamin) (Renal carcinoma antigen NY-REN-32)]	LMNA	5	39	56.2	74.139	0.88632	27.731	157	0.99426	27.572	157	508	3599
O00515	Ladinin-1 (Lad-1) (Linear IgA disease antigen) (LADA)	LAD1	6	3	8.1	57.13	0.9931	21.526	3	0.99427	22.728	3	137	70077
Q5QNZ2	ATP synthase F(0) complex subunit B1, mitochondrial (ATP synthase peripheral stalk-membrane subunit b) (ATP synthase subunit b)	ATP5PB	2	4	20.5	22.275	0.95886	18.676	11	0.99432	17.344	11	860	80015
P35998	26S proteasome regulatory subunit 7 (26S proteasome AAA-ATPase subunit RPT1) (Proteasome 26S subunit ATPase 2) (Protein MSS1)	PSMC2	3	18	48	48.633	1.0306	35.666	28	0.99451	23.508	28	1013	12861
P17301	Integrin alpha-2 (CD49 antigen-like family member B) (Collagen receptor) (Platelet membrane glycoprotein Ia) (GPIa) (VLA-2 subunit alpha) (CD antigen CD49b)	ITGA2	5	8	9.4	129.29	0.98578	21.32	9	0.99468	21.432	9	764	46402
P61923	Coatomer subunit zeta-1 (Zeta-1-coat protein) (Zeta-1 COP)	COPZ1	9	4	26.6	20.198	1.0819	17.732	17	0.99483	26.788	17	1356	65216
Q16222	UDP-N-acetylhexosamine pyrophosphorylase (Antigen X) (AGX) (Sperm-associated antigen 2) [Includes: UDP-N-acetylgalactosamine pyrophosphorylase (EC 2.7.7.83) (AGX-1); UDP-N-acetylglucosamine pyrophosphorylase (EC 2.7.7.23) (AGX-2)]	UAP1	1	2	5.2	58.768	0.97431	52.635	3	0.99497	20.402	3	1840	12443
Q01085	Nucleolysin TIAR (TIA-1-related protein)	TIAL1	5	4	14.1	41.59	0.90512	11.163	2	0.99586	11.739	2	1508	146901
P08133	Annexin A6 (67 kDa calelectrin) (Annexin VI) (Annexin-6) (Calphobindin-II) (CPB-II) (Chromobindin-20) (Lipocortin VI) (Protein III) (p68) (p70)	ANXA6	10	20	37.7	75.872	1.2743	19.806	48	0.9961	19.22	48	599	33866
G3V1J5	Exosome complex exonuclease RRP44 (KIAA1008, isoform CRA_c)	DIS3	3	7	13.8	90.583	0.95645	16.233	5	0.99612	20.623	5	3077	10428
F8VQQ3	MYG1 exonuclease	MYG1	4	3	13.3	33.819	0.83508	16.391	7	0.99616	23.326	7	2751	59810
Q14204	Cytoplasmic dynein 1 heavy chain 1 (Cytoplasmic dynein heavy chain 1) (Dynein heavy chain, cytosolic)	DYNC1H1	9	66	19.7	532.4	0.98139	37.081	123	0.99621	27.356	123	1712	2779
O95816	BAG family molecular chaperone regulator 2 (BAG-2) (Bcl-2-associated athanogene 2)	BAG2	1	2	12.3	23.772	1.2831	9.7691	5	0.99623	37.963	5	462	59702
Q5JTJ3	Cytochrome c oxidase assembly factor 6 homolog	COA6	2	3	22.4	14.116	1.2447	22.191	2	0.99626	17.23	2	1924	54265
P16435	NADPH--cytochrome P450 reductase (CPR) (P450R) (EC 1.6.2.4)	POR	3	25	35.6	76.689	1.114	53.128	64	0.99683	21.367	64	751	16238
A0A3B3ISN2	Parafibromin	CDC73	6	1	7.7	11.825	0.9177	14.268	4	0.99723	20.344	4	1989	5592
Q99497	Parkinson disease protein 7 (Maillard deglycase) (Oncogene DJ1) (Parkinsonism-associated deglycase) (Protein DJ-1) (DJ-1) (Protein/nucleic acid deglycase DJ-1) (EC 3.1.2.-) (EC 3.5.1.-) (EC 3.5.1.124)	PARK7	3	13	64.6	19.891	0.87924	25.925	67	0.99732	29.384	67	2508	8327
O94925	Glutaminase kidney isoform, mitochondrial (GLS) (EC 3.5.1.2) (K-glutaminase) (L-glutamine amidohydrolase) [Cleaved into: Glutaminase kidney isoform, mitochondrial 68 kDa chain; Glutaminase kidney isoform, mitochondrial 65 kDa chain]	GLS	3	10	19.9	73.46	1.3394	32.984	15	0.99733	30.408	15	408	32057
Q14566	DNA replication licensing factor MCM6 (EC 3.6.4.12) (p105MCM)	MCM6	1	7	11.3	92.888	1.0533	11.539	5	0.99744	10.186	5	1730	50356
E5RHT6	ADP-ribosylation factor GTPase-activating protein 1 (Fragment)	ARFGAP1	6	3	27.5	26.555	1.1616	8.7564	8	0.99744	19.448	8	2178	52570
Q15149	Plectin (PCN) (PLTN) (Hemidesmosomal protein 1) (HD1) (Plectin-1)	PLEC	4	25	8.5	531.78	0.85353	37.658	24	0.99767	37.598	24	1782	9478
Q7L2H7	Eukaryotic translation initiation factor 3 subunit M (eIF3m) (Fetal lung protein B5) (hFL-B5) (PCI domain-containing protein 1)	EIF3M	7	4	13.4	42.502	0.97254	28.716	11	0.99789	25.658	11	2042	123143
Q06203	Amidophosphoribosyltransferase (ATase) (EC 2.4.2.14) (Glutamine phosphoribosylpyrophosphate amidotransferase) (GPAT)	PPAT	3	4	10.3	57.398	1.2356	49.673	6	0.99798	17.568	6	1552	52043
Q99798	Aconitate hydratase, mitochondrial (Aconitase) (EC 4.2.1.3) (Citrate hydro-lyase)	ACO2	2	18	35.1	85.424	1.0812	27.661	42	0.99855	23.545	42	2533	11992
O14617	AP-3 complex subunit delta-1 (AP-3 complex subunit delta) (Adaptor-related protein complex 3 subunit delta-1) (Delta-adaptin)	AP3D1	4	3	5.9	130.16	0.79957	8.7431	6	0.99868	23.362	6	156	13038
C9JCJ5	Deleted.	0	2	6	51.2	16.963	1.0914	15.861	22	0.99877	59.669	22	1790	28333
Q5T6V5	Queuosine salvage protein	C9orf64	1	3	12.9	39.028	0.85306	4.317	2	0.99903	3.5653	2	1939	12881
Q9GZZ9	Ubiquitin-like modifier-activating enzyme 5 (Ubiquitin-activating enzyme 5) (ThiFP1) (UFM1-activating enzyme) (Ubiquitin-activating enzyme E1 domain-containing protein 1)	UBA5	6	4	17.3	44.863	1.0366	20.07	7	0.99959	19.965	7	2674	105338
Q9H3K6	BolA-like protein 2	BOLA2	2	2	32.6	10.116	0.86477	11.721	12	0.99966	12.901	12	2704	133645
Q9BR76	Coronin-1B (Coronin-2)	CORO1B	4	5	15.1	54.234	0.91759	47.232	8	1	33.615	7	2561	28764
E7EQR4	Ezrin	EZR	7	12	21.5	69.371	0.9662	24.018	31	1	27.044	31	733	17323
D6RGI3	Septin 11, isoform CRA_b (Septin-11)	SEPTIN11	8	5	15.1	49.005	1.1549	29.731	9	1	15.813	9	2854	639
Q9NYU2	UDP-glucose:glycoprotein glucosyltransferase 1 (UGT1) (hUGT1) (EC 2.4.1.-) (UDP--Glc:glycoprotein glucosyltransferase) (UDP-glucose ceramide glucosyltransferase-like 1)	UGGT1	2	18	15.2	177.19	0.83712	26.16	46	1.0006	27.072	45	2897	11939
O43399	Tumor protein D54 (hD54) (Tumor protein D52-like 2)	TPD52L2	3	8	61.2	22.237	0.9765	37.685	37	1.0006	16.963	37	237	70029
Q9UHB9	Signal recognition particle subunit SRP68 (SRP68) (Signal recognition particle 68 kDa protein)	SRP68	1	5	9.4	70.729	1.2295	23.25	12	1.0014	20.896	12	2970	34642
P04843	Dolichyl-diphosphooligosaccharide--protein glycosyltransferase subunit 1 (Dolichyl-diphosphooligosaccharide--protein glycosyltransferase 67 kDa subunit) (Ribophorin I) (RPN-I) (Ribophorin-1)	RPN1	3	23	38.2	68.569	0.97852	38.488	86	1.0015	31.561	86	540	15244
J3KTF8	Rho GDP-dissociation inhibitor 1 (Fragment)	ARHGDIA	6	7	44	21.517	1.2246	25.677	25	1.0015	40.15	25	1226	5927
Q6DKI1	60S ribosomal protein L7-like 1 (Large ribosomal subunit protein uL30-like 1)	RPL7L1	2	3	14.9	29.669	2.0421	43.509	3	1.0016	34.676	3	1970	84900
E9PM69	26S proteasome regulatory subunit 6A	PSMC3	2	15	49.9	44.323	0.72215	15.868	4	1.0017	26.963	4	771	16474
P31947	14-3-3 protein sigma (Epithelial cell marker protein 1) (Stratifin)	SFN	2	7	34.3	27.774	0.97729	22.301	9	1.0024	33.201	9	965	36420
G5E9W7	28S ribosomal protein S22, mitochondrial (Mitochondrial ribosomal protein S22, isoform CRA_e)	MRPS22	7	7	25.4	36.805	0.89279	24.209	12	1.0034	38.245	12	1472	37148
P13489	Ribonuclease inhibitor (Placental ribonuclease inhibitor) (Placental RNase inhibitor) (Ribonuclease/angiogenin inhibitor 1) (RAI)	RNH1	10	9	33.6	49.973	0.92455	32.162	34	1.0042	34.132	34	698	46725
A0A0A0MSI9	Myeloid differentiation primary response protein MyD88	MYD88	4	1	4.5	29.626	0.9314	9.9636	3	1.0043	28.978	3	2538	53180
P14923	Junction plakoglobin (Catenin gamma) (Desmoplakin III) (Desmoplakin-3)	JUP	7	12	24	81.744	0.81263	21.989	11	1.0053	39.292	11	726	2088
P07602	Prosaposin (Proactivator polypeptide) [Cleaved into: Saposin-A (Protein A); Saposin-B-Val; Saposin-B (Cerebroside sulfate activator) (CSAct) (Dispersin) (Sphingolipid activator protein 1) (SAP-1) (Sulfatide/GM1 activator); Saposin-C (A1 activator) (Co-beta-glucosidase) (Glucosylceramidase activator) (Sphingolipid activator protein 2) (SAP-2); Saposin-D (Component C) (Protein C)]	PSAP	4	2	5.2	58.112	1.4913	6.4417	2	1.0057	51.718	2	587	77075
Q7Z5L9	Interferon regulatory factor 2-binding protein 2 (IRF-2-binding protein 2) (IRF-2BP2)	IRF2BP2	1	11	44.5	61.024	1.0047	28.682	12	1.0061	31.058	12	2072	644
Q9BRK5	45 kDa calcium-binding protein (Cab45) (Stromal cell-derived factor 4) (SDF-4)	SDF4	1	3	14.1	41.806	0.92648	8.4231	2	1.0064	16.079	2	2567	124589
P05386	60S acidic ribosomal protein P1 (Large ribosomal subunit protein P1)	RPLP1	1	4	67.5	11.514	1.008	14.671	6	1.0067	17.119	6	555	1489
Q9NWH9	SAFB-like transcription modulator (Modulator of estrogen-induced transcription)	SLTM	10	4	4.2	117.15	1.0876	10.788	5	1.0067	21.608	5	2866	672
Q96P11	28S rRNA (cytosine-C(5))-methyltransferase (EC 2.1.1.-) (NOL1-related protein) (NOL1R) (NOL1/NOP2/Sun domain family member 5) (Williams-Beuren syndrome chromosomal region 20A protein)	NSUN5	3	3	7.7	46.691	1.1506	30.193	4	1.0067	50.521	4	2470	12799
Q8IWZ3	Ankyrin repeat and KH domain-containing protein 1 (HIV-1 Vpr-binding ankyrin repeat protein) (Multiple ankyrin repeats single KH domain) (hMASK)	ANKHD1	10	3	2.1	269.45	0.80993	42.522	2	1.0072	65.46	2	2129	115646
Q9H8Y8	Golgi reassembly-stacking protein 2 (GRS2) (Golgi phosphoprotein 6) (GOLPH6) (Golgi reassembly-stacking protein of 55 kDa) (GRASP55) (p59)	GORASP2	1	5	19.9	47.145	1.3462	20.28	15	1.0072	15.8	15	2737	4228
P15291	Beta-1,4-galactosyltransferase 1 (Beta-1,4-GalTase 1) (Beta4Gal-T1) (b4Gal-T1) (EC 2.4.1.-) (Beta-N-acetylglucosaminyl-glycolipid beta-1,4-galactosyltransferase) (Beta-N-acetylglucosaminylglycopeptide beta-1,4-galactosyltransferase) (EC 2.4.1.38) (Lactose synthase A protein) (EC 2.4.1.22) (N-acetyllactosamine synthase) (EC 2.4.1.90) (Nal synthase) (Neolactotriaosylceramide beta-1,4-galactosyltran…	B4GALT1	2	2	12.3	43.92	1.4156	15.893	2	1.0072	15.429	2	732	51135
P48637	Glutathione synthetase (GSH synthetase) (GSH-S) (EC 6.3.2.3) (Glutathione synthase)	GSS	13	9	27.4	52.384	1.105	19.509	12	1.0076	11.567	12	1137	10447
Q9BZE1	39S ribosomal protein L37, mitochondrial (L37mt) (MRP-L37) (39S ribosomal protein L2, mitochondrial) (L2mt) (MRP-L2) (Mitochondrial large ribosomal subunit protein mL37)	MRPL37	4	2	7.3	48.117	0.9999	33.356	4	1.008	30.065	4	2651	211715
Q9UPN3	Microtubule-actin cross-linking factor 1, isoforms 1/2/3/5 (620 kDa actin-binding protein) (ABP620) (Actin cross-linking family protein 7) (Macrophin-1) (Trabeculin-alpha)	MACF1	8	5	0.9	838.3	0.82898	5.907	2	1.0081	22.017	2	3044	37196
P62424	60S ribosomal protein L7a (Large ribosomal subunit protein eL8) (PLA-X polypeptide) (Surfeit locus protein 3)	RPL7A	3	16	44.7	29.995	1.3266	37.576	97	1.0081	30.931	97	1388	9454
P09622	Dihydrolipoyl dehydrogenase, mitochondrial (EC 1.8.1.4) (Dihydrolipoamide dehydrogenase) (Glycine cleavage system L protein)	DLD	5	13	26.3	54.177	1.0277	35.305	40	1.0083	19.762	40	632	2447
O94979	Protein transport protein Sec31A (ABP125) (ABP130) (SEC31-like protein 1) (SEC31-related protein A) (Web1-like protein)	SEC31A	15	20	20.2	133.01	1.2086	34.485	67	1.0088	26.6	67	411	18947
Q9UKD2	mRNA turnover protein 4 homolog (Ribosome assembly factor MRTO4)	MRTO4	1	2	9.6	27.56	1.0458	10.69	19	1.0092	21.745	19	3000	76067
Q5QPM7	Proteasome inhibitor PI31 subunit	PSMF1	5	2	14.4	28.956	0.99289	47.78	6	1.0093	18.748	6	2298	14031
Q9Y266	Nuclear migration protein nudC (Nuclear distribution protein C homolog)	NUDC	3	8	30.8	38.242	0.95747	30.022	49	1.01	19.895	49	3064	58128
P63172	Dynein light chain Tctex-type 1 (Protein CW-1) (T-complex testis-specific protein 1 homolog)	DYNLT1	1	2	37.2	12.452	1.2533	1.7204	2	1.01	8.9522	2	1428	148223
P46977	Dolichyl-diphosphooligosaccharide--protein glycosyltransferase subunit STT3A (Oligosaccharyl transferase subunit STT3A) (STT3-A) (EC 2.4.99.18) (B5) (Integral membrane protein 1) (Transmembrane protein TMC)	STT3A	4	6	8.7	80.529	1.2537	24.094	17	1.01	39.438	17	1121	44879
P09543	2',3'-cyclic-nucleotide 3'-phosphodiesterase (CNP) (CNPase) (EC 3.1.4.37)	CNP	5	10	28	47.578	0.96373	29.175	22	1.0101	18.669	22	630	9223
O15371	Eukaryotic translation initiation factor 3 subunit D (eIF3d) (Eukaryotic translation initiation factor 3 subunit 7) (eIF-3-zeta) (eIF3 p66)	EIF3D	5	8	23	63.972	1.0566	40.565	15	1.0102	15.287	15	210	36655
P10809	60 kDa heat shock protein, mitochondrial (EC 5.6.1.7) (60 kDa chaperonin) (Chaperonin 60) (CPN60) (Heat shock protein 60) (HSP-60) (Hsp60) (HuCHA60) (Mitochondrial matrix protein P1) (P60 lymphocyte protein)	HSPD1	7	50	69.5	61.054	1.0189	44.284	577	1.011	20.996	577	659	2967
A0A0D9SFK2	Unconventional myosin-XVIIIa	MYO18A	2	4	3.3	231.1	1.2073	5.6776	2	1.011	11.63	2	2311	89317
P14406	Cytochrome c oxidase subunit 7A2, mitochondrial (Cytochrome c oxidase subunit VIIa-liver/heart) (Cytochrome c oxidase subunit VIIa-L) (Cytochrome c oxidase subunit VIIaL)	COX7A2	5	2	27.7	9.3959	1.1406	28.872	8	1.0112	24.17	8	714	67266
Q9Y5M8	Signal recognition particle receptor subunit beta (SR-beta) (Protein APMCF1)	SRPRB	2	5	24	29.702	1.6398	32.642	7	1.0112	36.47	8	3163	38436
P11940	Polyadenylate-binding protein 1 (PABP-1) (Poly(A)-binding protein 1)	PABPC1	20	20	39.3	70.67	1.1027	25.251	94	1.0113	24.744	94	682	12040
B1AJQ6	Syntaxin-12 (Fragment)	STX12	2	3	21.9	24.576	0.85929	5.7969	3	1.0114	15.242	3	2110	31324
K7EL75	N-acetylglucosamine-1-phosphodiester alpha-N-acetylglucosaminidase (Fragment)	NAGPA	1	3	17.4	18.631	0.96208	11.292	5	1.0115	19.577	5	3272	62068
P62879	Guanine nucleotide-binding protein G(I)/G(S)/G(T) subunit beta-2 (G protein subunit beta-2) (Transducin beta chain 2)	GNB2	7	6	23.2	37.331	0.99663	17.934	15	1.0119	30.858	15	1409	3964
Q15904	V-type proton ATPase subunit S1 (V-ATPase subunit S1) (Protein XAP-3) (V-ATPase Ac45 subunit) (V-ATPase S1 accessory protein) (Vacuolar proton pump subunit S1)	ATP6AP1	3	2	6.6	52.025	1.4374	8.9355	2	1.0119	10.862	2	1834	52055
O75396	Vesicle-trafficking protein SEC22b (ER-Golgi SNARE of 24 kDa) (ERS-24) (ERS24) (SEC22 vesicle-trafficking protein homolog B) (SEC22 vesicle-trafficking protein-like 1)	SEC22B	2	6	28.4	24.593	1.1311	19.061	10	1.0122	19.716	10	346	34794
H0Y9M8	NADH dehydrogenase [ubiquinone] iron-sulfur protein 4, mitochondrial (Complex I-18 kDa) (NADH-ubiquinone oxidoreductase 18 kDa subunit) (Fragment)	NDUFS4	2	1	12.9	13.498	1.1644	17.989	4	1.0123	10.331	4	226	111158
J3QLR8	28S ribosomal protein S23, mitochondrial	MRPS23	2	2	13.2	17.517	1.0852	11.557	5	1.0124	15.181	5	3120	6831
P50995	Annexin A11 (56 kDa autoantigen) (Annexin XI) (Annexin-11) (Calcyclin-associated annexin 50) (CAP-50)	ANXA11	2	4	8.9	54.389	0.923	10.347	4	1.0128	12.855	4	1197	48692
O60884	DnaJ homolog subfamily A member 2 (Cell cycle progression restoration gene 3 protein) (Dnj3) (Dj3) (HIRA-interacting protein 4) (Renal carcinoma antigen NY-REN-14)	DNAJA2	3	7	28.6	45.745	0.94956	19.034	9	1.0128	8.2606	9	312	54168
Q8NBN7	Retinol dehydrogenase 13 (EC 1.1.1.300) (Short chain dehydrogenase/reductase family 7C member 3)	RDH13	1	3	15.4	35.932	1.2133	19.384	6	1.0128	18.56	6	2191	127187
P12955	Xaa-Pro dipeptidase (X-Pro dipeptidase) (EC 3.4.13.9) (Imidodipeptidase) (Peptidase D) (Proline dipeptidase) (Prolidase)	PEPD	4	8	21.7	54.548	1.2861	43.716	21	1.0128	31.838	20	692	698
B1ANR0	Polyadenylate-binding protein (PABP)	PABPC4	8	13	24.6	67.97	0.95572	19.777	23	1.0131	17.611	23	1638	9795
P50991	T-complex protein 1 subunit delta (TCP-1-delta) (CCT-delta) (Stimulator of TAR RNA-binding)	CCT4	1	19	44.2	57.924	1.0237	22.059	100	1.0133	19.865	100	1196	13984
B4DY09	Interleukin enhancer-binding factor 2 (cDNA FLJ51660, highly similar to Interleukin enhancer-binding factor 2)	ILF2	4	13	37.2	38.91	0.99537	59.926	59	1.0138	22.909	59	1599	18978
Q7RTV0	PHD finger-like domain-containing protein 5A (PHD finger-like domain protein 5A) (Splicing factor 3B-associated 14 kDa protein) (SF3b14b)	PHF5A	1	5	53.6	12.405	0.88218	12.184	12	1.0142	15.09	12	2051	28532
B8ZZZ0	3-hydroxyisobutyryl-CoA hydrolase, mitochondrial (EC 3.1.2.4) (3-hydroxyisobutyryl-coenzyme A hydrolase) (Fragment)	HIBCH	3	2	6.6	30.053	0.98582	1.4611	2	1.0142	1.5723	2	1986	57475
Q5QPE2	Protein transport protein SEC23 (Fragment)	SEC23B	6	7	28.4	37.143	1.664	29.337	7	1.0143	31.91	7	1814	23798
Q71U36	Tubulin alpha-1A chain (Alpha-tubulin 3) (Tubulin B-alpha-1) (Tubulin alpha-3 chain) [Cleaved into: Detyrosinated tubulin alpha-1A chain]	TUBA1A	5	18	49.9	50.135	0.93388	37.974	4	1.0145	39.174	4	2032	24226
Q9Y3U8	60S ribosomal protein L36 (Large ribosomal subunit protein eL36)	RPL36	3	5	38.1	12.254	1.0168	59.108	31	1.0148	17.772	31	3129	14897
O76094	Signal recognition particle subunit SRP72 (SRP72) (Signal recognition particle 72 kDa protein)	SRP72	3	8	16.1	74.605	1.2019	16.526	18	1.0148	18.484	18	391	10498
P15848	Arylsulfatase B (ASB) (EC 3.1.6.12) (N-acetylgalactosamine-4-sulfatase) (G4S)	ARSB	2	4	10.9	59.687	0.90772	13.278	4	1.0149	24.035	4	738	74984
Q9Y5P6	Mannose-1-phosphate guanyltransferase beta (EC 2.7.7.13) (GDP-mannose pyrophosphorylase B) (GTP-mannose-1-phosphate guanylyltransferase beta)	GMPPB	1	2	10.6	39.834	0.77332	12.438	3	1.0152	16.678	3	3164	97705
A0A2R8YDQ9	Succinate--CoA ligase [ADP-forming] subunit beta, mitochondrial (EC 6.2.1.5) (ATP-specific succinyl-CoA synthetase subunit beta) (A-SCS) (Succinyl-CoA synthetase beta-A chain) (SCS-betaA)	SUCLA2	10	7	22.5	43.841	1.0984	10.273	9	1.0152	62.478	9	2936	82126
P05783	Keratin, type I cytoskeletal 18 (Cell proliferation-inducing gene 46 protein) (Cytokeratin-18) (CK-18) (Keratin-18) (K18)	KRT18	34	30	59.8	48.057	1.0154	36.567	231	1.0154	31.594	231	561	19297
Q06210	Glutamine--fructose-6-phosphate aminotransferase [isomerizing] 1 (EC 2.6.1.16) (D-fructose-6-phosphate amidotransferase 1) (Glutamine:fructose-6-phosphate amidotransferase 1) (GFAT 1) (GFAT1) (Hexosephosphate aminotransferase 1)	GFPT1	2	18	33.5	78.806	1.1918	33.592	78	1.0155	37.51	78	1553	26263
O15144	Actin-related protein 2/3 complex subunit 2 (Arp2/3 complex 34 kDa subunit) (p34-ARC)	ARPC2	2	4	12	34.333	1.1777	28.263	9	1.0157	39.768	9	194	21002
Q01081	Splicing factor U2AF 35 kDa subunit (U2 auxiliary factor 35 kDa subunit) (U2 small nuclear RNA auxiliary factor 1) (U2 snRNP auxiliary factor small subunit)	U2AF1	8	5	30.4	27.872	1.4816	32.89	10	1.016	22.979	10	644	6803
O94855	Protein transport protein Sec24D (SEC24-related protein D)	SEC24D	3	13	19	113.01	0.98092	21.14	18	1.0161	20.499	18	401	28489
P61326	Protein mago nashi homolog	MAGOH	3	2	19.2	17.163	1.1186	18.099	5	1.0161	9.0955	5	1344	87401
Q9BTE1	Dynactin subunit 5 (Dynactin subunit p25)	DCTN5	4	2	9.3	20.126	1.1445	10.852	8	1.0166	11.542	8	2589	57656
Q9Y676	28S ribosomal protein S18b, mitochondrial (MRP-S18-b) (Mrps18-b) (S18mt-b) (28S ribosomal protein S18-2, mitochondrial) (MRP-S18-2) (Mitochondrial small ribosomal subunit protein bS18b) (Mitochondrial small ribosomal subunit protein mS40)	MRPS18B	2	3	19.8	29.395	1.1119	15.522	6	1.0167	30.901	6	3175	18375
P09327	Villin-1	VIL1	4	29	41.5	92.694	1.0251	20.634	110	1.0168	23.614	110	625	707
P62266	40S ribosomal protein S23 (Small ribosomal subunit protein uS12)	RPS23	5	6	30.1	15.807	0.93999	43.478	50	1.0169	18.792	50	1375	9746
J3KNF8	Cytochrome b5 type B (Cytochrome b5 outer mitochondrial membrane isoform)	CYB5B	4	5	56	16.694	1.0902	32.405	13	1.0174	30.979	13	3268	57493
Q13045	Protein flightless-1 homolog	FLII	7	5	6.1	144.75	0.82705	21.768	8	1.0175	9.1109	8	1612	5252
Q15366	Poly(rC)-binding protein 2 (Alpha-CP2) (Heterogeneous nuclear ribonucleoprotein E2) (hnRNP E2)	PCBP2	12	8	36.7	38.58	0.95025	27.814	21	1.0177	37.262	21	1800	50651
E7EN77	Condensin complex subunit 1 (Fragment)	NCAPD2	2	3	6.4	102.65	1.2259	58.028	3	1.0179	43.809	3	1765	46408
P07237	Protein disulfide-isomerase (PDI) (EC 5.3.4.1) (Cellular thyroid hormone-binding protein) (Prolyl 4-hydroxylase subunit beta) (p55)	P4HB	12	35	65.2	57.116	1.1019	43.38	252	1.0181	29.307	252	581	12618
O75380	NADH dehydrogenase [ubiquinone] iron-sulfur protein 6, mitochondrial (Complex I-13kD-A) (CI-13kD-A) (NADH-ubiquinone oxidoreductase 13 kDa-A subunit)	NDUFS6	2	1	12.1	13.711	0.94133	12.166	3	1.0182	15.119	3	341	207361
Q9NP72	Ras-related protein Rab-18	RAB18	4	4	24.8	22.977	1.0161	17.528	14	1.0187	27.434	14	2778	89118
Q14694	Ubiquitin carboxyl-terminal hydrolase 10 (EC 3.4.19.12) (Deubiquitinating enzyme 10) (Ubiquitin thioesterase 10) (Ubiquitin-specific-processing protease 10)	USP10	6	6	12.9	87.133	0.86012	11.617	5	1.0191	29.257	5	1740	56451
P04181	Ornithine aminotransferase, mitochondrial (EC 2.6.1.13) (Ornithine delta-aminotransferase) (Ornithine--oxo-acid aminotransferase) [Cleaved into: Ornithine aminotransferase, hepatic form; Ornithine aminotransferase, renal form]	OAT	1	8	22.3	48.534	1.1292	26.777	22	1.0194	36.145	22	535	7643
Q15043	Metal cation symporter ZIP14 (LIV-1 subfamily of ZIP zinc transporter 4) (LZT-Hs4) (Solute carrier family 39 member 14) (Zrt- and Irt-like protein 14) (ZIP-14)	SLC39A14	3	2	9.8	54.212	0.86865	28.129	3	1.0196	9.0754	3	1770	86525
P00846	ATP synthase subunit a (F-ATPase protein 6)	MT-ATP6	1	2	8.4	24.817	1.4143	22.404	5	1.0196	8.0493	5	497	118274
O95881	Thioredoxin domain-containing protein 12 (EC 1.8.4.2) (Endoplasmic reticulum resident protein 18) (ER protein 18) (ERp18) (Endoplasmic reticulum resident protein 19) (ER protein 19) (ERp19) (Thioredoxin-like protein p19) (hTLP19)	TXNDC12	1	3	22.7	19.206	0.98497	13.64	9	1.0204	15.021	9	469	40139
P05023	Sodium/potassium-transporting ATPase subunit alpha-1 (Na(+)/K(+) ATPase alpha-1 subunit) (EC 7.2.2.13) (Sodium pump subunit alpha-1)	ATP1A1	14	25	27.4	112.89	1.0201	37.241	113	1.0208	25.49	113	544	4202
Q9GZL7	Ribosome biogenesis protein WDR12 (WD repeat-containing protein 12)	WDR12	1	3	11.8	47.707	0.93869	26.881	4	1.0209	33.753	4	2665	67340
A0A087WUN7	SRA stem-loop-interacting RNA-binding protein, mitochondrial	SLIRP	9	4	39.1	10.353	0.98824	14.93	16	1.022	18.629	16	2669	95785
E5RGM3	S-phase kinase-associated protein 1 (Fragment)	SKP1	5	2	41.2	11.575	1.5545	12.668	7	1.022	24.606	7	1430	181423
Q7Z5K2	Wings apart-like protein homolog (Friend of EBNA2 protein) (WAPL cohesin release factor)	WAPL	3	2	3.1	132.94	0.79445	7.2957	2	1.0221	27.373	2	2071	184543
Q8TB61	Adenosine 3'-phospho 5'-phosphosulfate transporter 1 (PAPS transporter 1) (Putative MAPK-activating protein PM15) (Putative NF-kappa-B-activating protein 48) (Solute carrier family 35 member B2)	SLC35B2	1	2	4.6	47.514	0.94809	25.738	4	1.0221	14.326	4	2239	62262
P22061	Protein-L-isoaspartate(D-aspartate) O-methyltransferase (PIMT) (EC 2.1.1.77) (L-isoaspartyl protein carboxyl methyltransferase) (Protein L-isoaspartyl/D-aspartyl methyltransferase) (Protein-beta-aspartate methyltransferase)	PCMT1	10	8	52.4	24.636	1.0978	18.197	11	1.0225	15.428	11	829	13176
C9JG87	39S ribosomal protein L39, mitochondrial (Fragment)	MRPL39	2	3	12.8	34.032	0.91774	22.044	4	1.0227	26.528	4	2894	34712
J3QSF2	Solute carrier family 12 member 4 (Fragment)	SLC12A4	7	1	10	9.5569	0.88522	25.621	2	1.0235	11.931	2	2979	123135
O00154	Cytosolic acyl coenzyme A thioester hydrolase (EC 3.1.2.2) (Acyl-CoA thioesterase 7) (Brain acyl-CoA hydrolase) (BACH) (hBACH) (CTE-IIa) (CTE-II) (Long chain acyl-CoA thioester hydrolase)	ACOT7	2	4	15.5	41.796	0.95611	30.862	15	1.0236	33.722	15	106	94265
P62136	Serine/threonine-protein phosphatase PP1-alpha catalytic subunit (PP-1A) (EC 3.1.3.16)	PPP1CA	4	9	31.5	37.512	1.1538	40.676	26	1.0239	27.162	26	1365	9808
A0A2R8Y811	40S ribosomal protein S14 (Fragment)	RPS14	3	7	38.7	16.159	1.0071	35.029	54	1.0241	21.558	54	1374	5404
O60506	Heterogeneous nuclear ribonucleoprotein Q (hnRNP Q) (Glycine- and tyrosine-rich RNA-binding protein) (GRY-RBP) (NS1-associated protein 1) (Synaptotagmin-binding, cytoplasmic RNA-interacting protein)	SYNCRIP	2	14	32.6	69.602	1.1476	34.035	37	1.0242	20.759	37	290	9078
P62140	Serine/threonine-protein phosphatase PP1-beta catalytic subunit (PP-1B) (PPP1CD) (EC 3.1.3.16) (EC 3.1.3.53)	PPP1CB	7	7	31.5	37.186	0.92216	38.718	7	1.0244	55.308	7	1366	4629
Q9NQC3	Reticulon-4 (Foocen) (Neurite outgrowth inhibitor) (Nogo protein) (Neuroendocrine-specific protein) (NSP) (Neuroendocrine-specific protein C homolog) (RTN-x) (Reticulon-5)	RTN4	4	5	8.3	129.93	1.0803	29.281	16	1.0251	44.866	16	2795	71873
P46776	60S ribosomal protein L27a (Large ribosomal subunit protein uL15)	RPL27A	6	6	43.9	16.561	0.97025	75.888	16	1.0252	37.472	16	1109	67495
P50453	Serpin B9 (Cytoplasmic antiproteinase 3) (CAP-3) (CAP3) (Peptidase inhibitor 9) (PI-9)	SERPINB9	1	5	19.1	42.403	1.0625	33.868	3	1.0254	49.411	3	1184	71439
J3QR09	Ribosomal protein L19	RPL19	3	7	30.6	23.134	1.0199	21.21	49	1.0255	25.363	49	1490	91982
Q9HAB8	Phosphopantothenate--cysteine ligase (EC 6.3.2.51) (Phosphopantothenoylcysteine synthetase) (PPC synthetase)	PPCS	2	3	13.8	34.005	1.1243	17.651	3	1.0256	15.19	3	2747	57086
P16422	Epithelial cell adhesion molecule (Ep-CAM) (Adenocarcinoma-associated antigen) (Cell surface glycoprotein Trop-1) (Epithelial cell surface antigen) (Epithelial glycoprotein) (EGP) (Epithelial glycoprotein 314) (EGP314) (hEGP314) (KS 1/4 antigen) (KSA) (Major gastrointestinal tumor-associated protein GA733-2) (Tumor-associated calcium signal transducer 1) (CD antigen CD326)	EPCAM	3	3	16.6	34.932	0.85699	8.9681	4	1.0261	26.762	4	750	12087
P61981	14-3-3 protein gamma (Protein kinase C inhibitor protein 1) (KCIP-1) [Cleaved into: 14-3-3 protein gamma, N-terminally processed]	YWHAG	1	9	38.9	28.302	0.81425	40.865	13	1.0263	17.556	13	1363	36452
P61604	10 kDa heat shock protein, mitochondrial (Hsp10) (10 kDa chaperonin) (Chaperonin 10) (CPN10) (Early-pregnancy factor) (EPF)	HSPE1	4	11	83.3	10.932	0.86252	39.317	143	1.0263	16.744	143	1349	9133
P61106	Ras-related protein Rab-14	RAB14	2	3	26.5	23.897	0.96831	56.1	4	1.0266	33.977	4	1330	22192
P62877	E3 ubiquitin-protein ligase RBX1 (EC 2.3.2.27) (EC 2.3.2.32) (E3 ubiquitin-protein transferase RBX1) (Protein ZYP) (RING finger protein 75) (RING-box protein 1) (Rbx1) (Regulator of cullins 1) (ROC1) [Cleaved into: E3 ubiquitin-protein ligase RBX1, N-terminally processed (E3 ubiquitin-protein transferase RBX1, N-terminally processed)]	RBX1	1	2	17.6	12.274	0.96912	12.964	4	1.0266	16.857	4	1408	569
Q14258	E3 ubiquitin/ISG15 ligase TRIM25 (EC 6.3.2.n3) (Estrogen-responsive finger protein) (RING finger protein 147) (RING-type E3 ubiquitin transferase) (EC 2.3.2.27) (RING-type E3 ubiquitin transferase TRIM25) (Tripartite motif-containing protein 25) (Ubiquitin/ISG15-conjugating enzyme TRIM25) (Zinc finger protein 147)	TRIM25	2	6	11.4	70.973	1.4374	32.038	8	1.0266	12.243	8	1718	30549
C9JIK8	Cysteine protease (EC 3.4.22.-) (Fragment)	ATG4B	6	2	13.2	24.833	1.0628	8.3121	5	1.0267	11.609	5	3141	137539
A0A024RA52	Proteasome subunit alpha type (EC 3.4.25.1)	PSMA2	5	9	50.4	25.898	1.1288	62.431	12	1.0272	20.006	12	872	2157
Q8N5K1	CDGSH iron-sulfur domain-containing protein 2 (Endoplasmic reticulum intermembrane small protein) (MitoNEET-related 1 protein) (Miner1) (Nutrient-deprivation autophagy factor-1) (NAF-1)	CISD2	4	3	20	15.278	1.0266	18.01	10	1.0275	13.264	10	2170	126493
A0A3B3IT15	Coatomer subunit alpha	COPA	12	26	26.1	136.02	1.1412	37.311	63	1.0275	29.411	63	1254	21478
O76071	Probable cytosolic iron-sulfur protein assembly protein CIAO1 (WD repeat-containing protein 39)	CIAO1	1	3	16.2	37.84	0.81808	20.329	3	1.0277	24.121	3	390	152050
H9KV28	Protein diaphanous homolog 1	DIAPH1	6	6	8	136.85	0.86049	21.464	4	1.0282	10.836	4	293	7844
F2Z3H0	DnaJ homolog subfamily C member 2	DNAJC2	3	2	28	13.502	0.97315	39.955	4	1.0283	17.814	4	2514	74000
P54687	Branched-chain-amino-acid aminotransferase, cytosolic (BCAT(c)) (EC 2.6.1.42) (Protein ECA39)	BCAT1	3	5	15	42.966	1.0859	17.822	6	1.0287	18.902	6	1267	11997
K7EK07	Histone H3 (Fragment)	H3-3B	10	6	26.5	14.914	1.0343	34.029	100	1.0288	25.029	100	1449	45136
Q15836	Vesicle-associated membrane protein 3 (VAMP-3) (Cellubrevin) (CEB) (Synaptobrevin-3)	VAMP3	7	3	40	11.309	0.9326	30.002	10	1.0292	29.56	10	1833	4252
P33176	Kinesin-1 heavy chain (Conventional kinesin heavy chain) (Ubiquitous kinesin heavy chain) (UKHC)	KIF5B	6	19	25.2	109.68	0.99509	27.655	32	1.0292	22.426	32	974	1018
Q969Z0	FAST kinase domain-containing protein 4 (Cell cycle progression restoration protein 2) (Cell cycle progression protein 2) (Protein TBRG4) (Transforming growth factor beta regulator 4)	TBRG4	4	3	7.6	70.737	0.90609	3.9783	3	1.0293	15.031	3	2366	11591
P54709	Sodium/potassium-transporting ATPase subunit beta-3 (Sodium/potassium-dependent ATPase subunit beta-3) (ATPB-3) (CD antigen CD298)	ATP1B3	4	3	16.1	31.512	1.1312	22.684	10	1.0293	14.208	10	1269	87823
P34896	Serine hydroxymethyltransferase, cytosolic (SHMT) (EC 2.1.2.1) (Glycine hydroxymethyltransferase) (Serine methylase)	SHMT1	3	4	11.8	53.082	1.2789	70.148	4	1.0294	7.5013	4	983	14932
P06748	Nucleophosmin (NPM) (Nucleolar phosphoprotein B23) (Nucleolar protein NO38) (Numatrin)	NPM1	3	14	47.3	32.575	1.0325	42.73	113	1.0295	23.39	113	574	4896
B7Z7F3	Ran-binding protein 3 (cDNA FLJ58549, highly similar to Ran-binding protein 3)	RANBP3	10	6	18.2	52.894	1.0191	37.208	6	1.03	50.788	5	2728	5023
F8W726	Ubiquitin-associated protein 2-like	UBAP2L	7	6	11.2	113.63	0.78515	13.842	7	1.0302	28.45	7	1706	32161
A0A087WUK2	Heterogeneous nuclear ribonucleoprotein D-like (Heterogeneous nuclear ribonucleoprotein D-like, isoform CRA_b)	HNRNPDL	2	8	31.7	40.04	1.2362	19.359	10	1.0314	26.796	10	184	35106
P27797	Calreticulin (CRP55) (Calregulin) (Endoplasmic reticulum resident protein 60) (ERp60) (HACBP) (grp60)	CALR	3	18	48.9	48.141	1.0519	43.49	80	1.0316	28.658	80	898	49472
Q9H6F5	Coiled-coil domain-containing protein 86 (Cytokine-induced protein with coiled-coil domain)	CCDC86	2	2	9.4	40.235	1.0153	30.424	6	1.0325	28.88	6	2723	16159
P59998	Actin-related protein 2/3 complex subunit 4 (Arp2/3 complex 20 kDa subunit) (p20-ARC)	ARPC4	8	4	25	19.667	0.88216	60.268	17	1.0331	50.325	17	1304	47549
P42704	Leucine-rich PPR motif-containing protein, mitochondrial (130 kDa leucine-rich protein) (LRP 130) (GP130)	LRPPRC	7	56	44.9	157.9	1.1483	36.287	204	1.0336	27.453	203	1080	6818
Q9BT78	COP9 signalosome complex subunit 4 (SGN4) (Signalosome subunit 4) (JAB1-containing signalosome subunit 4)	COPS4	4	6	24.9	46.268	1.1715	14.213	8	1.0348	10.691	8	2586	21309
Q9Y3B7	39S ribosomal protein L11, mitochondrial (L11mt) (MRP-L11) (Mitochondrial large ribosomal subunit protein uL11m)	MRPL11	3	4	30.2	20.683	1.0676	25.79	18	1.035	21.068	18	3112	8537
A0A087X020	Ribosome maturation protein SBDS	SBDS	3	5	18.8	28.864	1.2639	13.668	4	1.0356	17.415	4	3107	56350
Q9Y3D6	Mitochondrial fission 1 protein (FIS1 homolog) (hFis1) (Tetratricopeptide repeat protein 11) (TPR repeat protein 11)	FIS1	1	1	8.6	16.937	0.70817	0.45371	2	1.0362	13.071	2	3118	69967
Q96FX7	tRNA (adenine(58)-N(1))-methyltransferase catalytic subunit TRMT61A (EC 2.1.1.220) (mRNA methyladenosine-N(1)-methyltransferase catalytic subunit TRMT61A) (EC 2.1.1.-) (tRNA(m1A58)-methyltransferase subunit TRMT61A) (tRNA(m1A58)MTase subunit TRMT61A)	TRMT61A	2	2	8	31.381	1.2122	14.279	6	1.0362	3.2792	6	2417	53764
P60866	40S ribosomal protein S20 (Small ribosomal subunit protein uS10)	RPS20	4	4	28.6	13.373	0.90991	29.048	39	1.0368	14.854	39	1315	38045
F5H702	39S ribosomal protein L48, mitochondrial	MRPL48	2	2	22.1	12.77	1.1747	41.848	2	1.0368	7.6087	2	2421	141872
O95793	Double-stranded RNA-binding protein Staufen homolog 1	STAU1	5	16	41.2	63.182	0.91497	36.111	24	1.0371	49.332	24	460	38908
Q9BWD1	Acetyl-CoA acetyltransferase, cytosolic (EC 2.3.1.9) (Acetyl-CoA transferase-like protein) (Cytosolic acetoacetyl-CoA thiolase)	ACAT2	1	13	56.4	41.35	1.1569	48.729	38	1.0372	25.841	38	2620	8292
I3L1R7	Ethanolamine-phosphate cytidylyltransferase	PCYT2	7	4	16.1	41.395	0.96544	26.156	9	1.0376	22.786	9	2503	151878
P55072	Transitional endoplasmic reticulum ATPase (TER ATPase) (EC 3.6.4.6) (15S Mg(2+)-ATPase p97 subunit) (Valosin-containing protein) (VCP)	VCP	3	33	49.6	89.321	1.0099	37.966	152	1.0377	27.373	152	1279	10294
P48643	T-complex protein 1 subunit epsilon (TCP-1-epsilon) (CCT-epsilon)	CCT5	6	23	47.5	59.67	1.2749	34.462	63	1.0378	27.042	63	1138	31805
P30085	UMP-CMP kinase (EC 2.7.4.14) (Deoxycytidylate kinase) (CK) (dCMP kinase) (Nucleoside-diphosphate kinase) (EC 2.7.4.6) (Uridine monophosphate/cytidine monophosphate kinase) (UMP/CMP kinase) (UMP/CMPK)	CMPK1	2	5	32.1	22.222	1.028	23.896	8	1.0379	18.315	8	934	48545
A0A3B3ITG6	Translation initiation factor eIF-2B subunit epsilon (Fragment)	EIF2B5	8	2	6.4	60.823	1.1144	17.138	6	1.0381	16.332	6	1620	204946
G3XAM7	Catenin (Cadherin-associated protein), alpha 1, 102kDa, isoform CRA_a (Catenin alpha-1)	CTNNA1	10	5	6.8	92.721	1.1257	5.4392	2	1.0384	0.37915	2	989	80452
E3W994	CLIP-associating protein 2	CLASP2	9	3	3.7	138.86	0.93728	11.074	4	1.0388	33.422	4	318	117830
Q9NPJ3	Acyl-coenzyme A thioesterase 13 (Acyl-CoA thioesterase 13) (EC 3.1.2.-) (Hotdog-fold thioesterase superfamily member 2) (Palmitoyl-CoA hydrolase) (EC 3.1.2.2) (Thioesterase superfamily member 2) (THEM2) [Cleaved into: Acyl-coenzyme A thioesterase 13, N-terminally processed]	ACOT13	1	2	15.7	14.96	0.91676	32.218	5	1.0398	6.2064	5	2789	99385
Q8N4V1	Membrane magnesium transporter 1 (ER membrane protein complex subunit 5) (Transmembrane protein 32)	MMGT1	1	1	18.3	14.686	1.0847	9.92	2	1.0399	10.356	2	2168	211794
Q8IYB3	Serine/arginine repetitive matrix protein 1 (SR-related nuclear matrix protein of 160 kDa) (SRm160) (Ser/Arg-related nuclear matrix protein)	SRRM1	4	2	5.6	102.33	1.0124	26.972	3	1.0403	6.5064	3	2140	23849
Q9UMX0	Ubiquilin-1 (Protein linking IAP with cytoskeleton 1) (PLIC-1) (hPLIC-1)	UBQLN1	2	5	17.5	62.518	0.97728	16.842	9	1.0406	17.622	9	3029	6659
D6REP8	Histidine triad nucleotide-binding protein 1	HINT1	5	3	52.6	8.7079	1.0024	17.949	27	1.0411	16.996	27	1169	19832
P22234	Multifunctional protein ADE2 [Includes: Phosphoribosylaminoimidazole-succinocarboxamide synthase (EC 6.3.2.6) (SAICAR synthetase); Phosphoribosylaminoimidazole carboxylase (EC 4.1.1.21) (AIR carboxylase) (AIRC)]	PAICS	3	17	40.2	47.079	1.2373	35.521	53	1.0412	19.879	53	832	4108
E9PRB9	Microsomal signal peptidase 25 kDa subunit (Signal peptidase complex subunit 2)	SPCS2	5	3	29.9	10.163	1.4056	39.977	2	1.0418	21.669	2	1758	37096
B7Z9I1	Medium-chain specific acyl-CoA dehydrogenase, mitochondrial (EC 1.3.8.7)	ACADM	6	11	32.7	42.426	0.98984	38.229	18	1.0421	52.433	18	672	43499
J3KQ66	Reelin	RELN	2	4	1.8	388.43	1.0118	16.127	7	1.0425	20.399	7	1464	28370
O75400	Pre-mRNA-processing factor 40 homolog A (Fas ligand-associated factor 1) (Formin-binding protein 11) (Formin-binding protein 3) (Huntingtin yeast partner A) (Huntingtin-interacting protein 10) (HIP-10) (Huntingtin-interacting protein A) (Renal carcinoma antigen NY-REN-6)	PRPF40A	4	4	5.9	108.8	1.0604	51.12	3	1.0429	16.369	3	347	61099
P04406	Glyceraldehyde-3-phosphate dehydrogenase (GAPDH) (EC 1.2.1.12) (Peptidyl-cysteine S-nitrosylase GAPDH) (EC 2.6.99.-)	GAPDH	3	25	59.7	36.053	1.2325	36.577	491	1.0429	22.059	491	536	6327
P08240	Signal recognition particle receptor subunit alpha (SR-alpha) (Docking protein alpha) (DP-alpha)	SRPRA	1	3	8.2	69.81	1.7168	44.375	7	1.0429	29.785	7	604	52033
P06737	Glycogen phosphorylase, liver form (EC 2.4.1.1)	PYGL	2	12	17.5	97.147	1.0941	14.966	13	1.0435	26.96	13	572	26625
P52907	F-actin-capping protein subunit alpha-1 (CapZ alpha-1)	CAPZA1	1	8	47.9	32.922	1.0326	50.43	13	1.0438	29.79	13	1238	32451
P54886	Delta-1-pyrroline-5-carboxylate synthase (P5CS) (Aldehyde dehydrogenase family 18 member A1) [Includes: Glutamate 5-kinase (GK) (EC 2.7.2.11) (Gamma-glutamyl kinase); Gamma-glutamyl phosphate reductase (GPR) (EC 1.2.1.41) (Glutamate-5-semialdehyde dehydrogenase) (Glutamyl-gamma-semialdehyde dehydrogenase)]	ALDH18A1	1	33	49.6	87.301	1.2219	24.522	127	1.0444	28.764	127	1273	2077
O95372	Acyl-protein thioesterase 2 (APT-2) (EC 3.1.2.-) (Lysophospholipase II) (LPL-II) (LysoPLA II)	LYPLA2	7	5	26	24.737	0.66333	12.16	7	1.0446	28.72	7	434	33725
E7ESV4	Ras-related protein Rap-1b (Fragment)	RAP1B	20	4	31.2	17.682	1.23	27.986	15	1.0454	24.628	15	1338	135808
O95197	Reticulon-3 (Homolog of ASY protein) (HAP) (Neuroendocrine-specific protein-like 2) (NSP-like protein 2) (Neuroendocrine-specific protein-like II) (NSP-like protein II) (NSPLII)	RTN3	5	3	6.3	112.61	1.9535	6.5801	4	1.0457	28.747	4	423	6522
P09669	Cytochrome c oxidase subunit 6C (Cytochrome c oxidase polypeptide VIc)	COX6C	1	3	21.3	8.7813	0.96285	37.392	7	1.0458	20.987	7	636	8304
P27348	14-3-3 protein theta (14-3-3 protein T-cell) (14-3-3 protein tau) (Protein HS1)	YWHAQ	2	14	56.7	27.764	1.354	25.585	28	1.0458	19.732	28	891	26371
C9JHW1	GRB10-interacting GYF protein 2 (Fragment)	GIGYF2	11	4	9.4	81.788	0.8074	22.388	5	1.046	32.061	5	2022	1095
P35244	Replication protein A 14 kDa subunit (RP-A p14) (Replication factor A protein 3) (RF-A protein 3)	RPA3	2	3	33.9	13.569	1.0424	32.335	2	1.0461	39.002	2	994	42693
A0A0D9SFB3	RNA helicase (EC 3.6.4.13)	DDX3X	27	17	32.7	70.839	1.3254	30.99	37	1.0465	21.706	37	142	34369
Q9BVG4	Protein PBDC1 (Polysaccharide biosynthesis domain-containing protein 1)	PBDC1	2	3	16.3	26.056	0.9168	34.89	2	1.0467	2.1356	2	2612	83111
Q9BS26	Endoplasmic reticulum resident protein 44 (ER protein 44) (ERp44) (Thioredoxin domain-containing protein 4)	ERP44	1	4	11.6	46.971	0.98304	14.12	14	1.0467	12.072	14	2576	33650
P49458	Signal recognition particle 9 kDa protein (SRP9)	SRP9	2	4	43	10.112	1.1868	18.761	20	1.0468	47.065	20	1157	56019
P11387	DNA topoisomerase 1 (EC 5.6.2.1) (DNA topoisomerase I)	TOP1	12	12	18.4	90.725	0.96353	22.342	30	1.0478	30.936	30	673	5917
P21980	Protein-glutamine gamma-glutamyltransferase 2 (EC 2.3.2.13) (Tissue transglutaminase) (Transglutaminase C) (TG(C)) (TGC) (TGase C) (Transglutaminase H) (TGase H) (Transglutaminase-2) (TGase-2)	TGM2	3	7	13.8	77.328	0.66263	21.202	15	1.0479	12.093	15	826	5872
G3V1R5	Nardilysin (Nardilysin (N-arginine dibasic convertase), isoform CRA_e)	NRDC	5	2	2.3	125.12	0.8172	2.9123	2	1.0487	7.7504	2	269	7589
Q96AG4	Leucine-rich repeat-containing protein 59 (Ribosome-binding protein p34) (p34) [Cleaved into: Leucine-rich repeat-containing protein 59, N-terminally processed]	LRRC59	2	12	34.5	34.93	1.4005	58.916	51	1.05	22.402	51	2375	23229
Q9Y6D9	Mitotic spindle assembly checkpoint protein MAD1 (Mitotic arrest deficient 1-like protein 1) (MAD1-like protein 1) (Mitotic checkpoint MAD1 protein homolog) (HsMAD1) (hMAD1) (Tax-binding protein 181)	MAD1L1	5	3	5.8	83.066	0.8009	7.9433	2	1.0503	7.8873	2	3185	138635
Q15691	Microtubule-associated protein RP/EB family member 1 (APC-binding protein EB1) (End-binding protein 1) (EB1)	MAPRE1	1	12	49.6	29.999	1.0208	37.667	58	1.0503	26.061	58	1824	26025
Q32P28	Prolyl 3-hydroxylase 1 (EC 1.14.11.7) (Growth suppressor 1) (Leucine- and proline-enriched proteoglycan 1) (Leprecan-1)	P3H1	2	3	9	83.393	1.1141	10.381	2	1.0503	24.544	2	1886	131889
J3QRI7	60S ribosomal protein L26 (Fragment)	RPL26	6	6	40.2	12.63	1.2503	51.278	59	1.0503	21.01	59	1341	16880
O14579	Coatomer subunit epsilon (Epsilon-coat protein) (Epsilon-COP)	COPE	3	4	21.1	34.482	0.95853	10.161	8	1.0505	17.613	8	155	18212
P62249	40S ribosomal protein S16 (Small ribosomal subunit protein uS9)	RPS16	6	10	59.6	16.445	1.0638	63.683	65	1.0508	30.023	65	1371	16066
E5RI99	60S ribosomal protein L30 (Fragment)	RPL30	5	6	58.8	12.656	1.5244	29.636	38	1.0508	16.722	38	1410	105767
Q09666	Neuroblast differentiation-associated protein AHNAK (Desmoyokin)	AHNAK	1	87	33.2	629.09	0.96108	39.673	101	1.0512	26.471	101	1583	5955
Q13011	Delta(3,5)-Delta(2,4)-dienoyl-CoA isomerase, mitochondrial (EC 5.3.3.-)	ECH1	3	9	33.2	35.816	0.94631	25.78	31	1.0518	26.541	31	1608	26510
D6R9I9	ATP-binding cassette sub-family E member 1	ABCE1	4	7	22.6	47.037	1.1457	16.768	11	1.0518	25.434	11	1337	4837
P0DP25	Calmodulin-3	CALM3	12	5	54.4	16.837	1.3206	33.714	32	1.0519	41.338	32	646	5383
Q9Y3A6	Transmembrane emp24 domain-containing protein 5 (p24 family protein gamma-2) (p24gamma2) (p28)	TMED5	3	3	14.4	26.005	1.2829	5.8062	5	1.0523	22.594	5	3108	42208
P82914	28S ribosomal protein S15, mitochondrial (MRP-S15) (S15mt) (Mitochondrial small ribosomal subunit protein uS15m)	MRPS15	1	2	8.6	29.842	0.70099	9.754	2	1.0524	37.24	2	1478	110821
Q04760	Lactoylglutathione lyase (EC 4.4.1.5) (Aldoketomutase) (Glyoxalase I) (Glx I) (Ketone-aldehyde mutase) (Methylglyoxalase) (S-D-lactoylglutathione methylglyoxal lyase)	GLO1	1	8	49.5	20.777	1.2487	18.967	20	1.053	21.913	20	1543	6520
F8W020	Nucleosome assembly protein 1-like 1 (Fragment)	NAP1L1	15	4	30.9	24.366	1.3201	20.24	21	1.0533	23.05	21	1283	62602
P00374	Dihydrofolate reductase (EC 1.5.1.3)	DHFR	4	3	21.9	21.452	0.92505	52.76	2	1.0541	10.778	2	482	94619
Q01469	Fatty acid-binding protein 5 (Epidermal-type fatty acid-binding protein) (E-FABP) (Fatty acid-binding protein, epidermal) (Psoriasis-associated fatty acid-binding protein homolog) (PA-FABP)	FABP5	3	7	63.7	15.164	0.96347	26.898	23	1.0547	17.29	23	1511	23771
H0YLZ1	Eukaryotic translation initiation factor 5 (Fragment)	EIF5	7	4	35.6	16.497	1.382	34.375	8	1.0547	10.946	8	1275	61895
A0A087WUL4	Retrotransposon-derived protein PEG10	PEG10	7	9	19	83.607	1.1973	60.282	32	1.0548	60.462	32	3203	16222
E7END7	Ras-related protein Rab-1A	RAB1A	11	10	53.8	19.018	0.99954	24.481	79	1.0549	21.102	79	1397	43792
O43396	Thioredoxin-like protein 1 (32 kDa thioredoxin-related protein)	TXNL1	5	7	37.4	32.251	1.3294	33.019	16	1.055	28.578	16	236	7846
A0A024R4E5	High density lipoprotein binding protein (Vigilin), isoform CRA_a (Vigilin)	HDLBP	21	28	29.1	141.44	1.0151	31.675	79	1.0551	20.275	79	3199	825
Q7L576	Cytoplasmic FMR1-interacting protein 1 (Specifically Rac1-associated protein 1) (Sra-1) (p140sra-1)	CYFIP1	15	5	4.4	145.18	0.95003	43.508	3	1.0552	16.518	3	2044	25480
P49721	Proteasome subunit beta type-2 (EC 3.4.25.1) (Macropain subunit C7-I) (Multicatalytic endopeptidase complex subunit C7-I) (Proteasome component C7-I)	PSMB2	2	5	24.4	22.836	1.0357	35.733	16	1.0552	30.399	16	1162	24858
O95373	Importin-7 (Imp7) (Ran-binding protein 7) (RanBP7)	IPO7	2	4	5.1	119.52	0.90369	57.304	9	1.0553	26.412	9	435	10601
P04424	Argininosuccinate lyase (ASAL) (EC 4.3.2.1) (Arginosuccinase)	ASL	3	4	11.2	51.657	1.3837	36.793	8	1.0556	28.837	8	537	6291
Q99436	Proteasome subunit beta type-7 (EC 3.4.25.1) (Macropain chain Z) (Multicatalytic endopeptidase complex chain Z) (Proteasome subunit Z)	PSMB7	2	4	10.5	29.965	1.4814	28.511	5	1.0556	50.128	5	2501	22474
K7EKE5	Tubulin gamma-1 chain	TUBG1	4	2	30.4	15.173	0.75218	23.662	3	1.0557	9.9679	3	844	136745
O14929	Histone acetyltransferase type B catalytic subunit (EC 2.3.1.48) (Histone acetyltransferase 1)	HAT1	3	6	17.9	49.512	1.2354	25.204	8	1.0559	17.733	8	175	8122
D3YTB1	60S ribosomal protein L32 (Fragment)	RPL32	4	10	47.4	15.616	1.1836	37.344	68	1.0562	28.532	68	1414	1907
P23284	Peptidyl-prolyl cis-trans isomerase B (PPIase B) (EC 5.2.1.8) (CYP-S1) (Cyclophilin B) (Rotamase B) (S-cyclophilin) (SCYLP)	PPIB	1	16	61.1	23.742	1.1604	36.134	176	1.0568	32.861	175	845	31145
Q16719	Kynureninase (EC 3.7.1.3) (L-kynurenine hydrolase)	KYNU	3	4	12.3	52.351	2.7078	48.379	4	1.0569	24.189	4	1863	61094
A0A0A6YYA0	Protein TMED7-TICAM2	TMED7-TICAM2	3	2	16.5	21.233	1.4978	16.568	4	1.0571	12.565	4	3110	157150
A0A0C4DGS1	Dolichyl-diphosphooligosaccharide--protein glycosyltransferase 48 kDa subunit (Oligosaccharyl transferase 48 kDa subunit)	DDOST	3	10	23	48.799	1.2676	35.594	25	1.0574	24.333	25	1043	18452
P38432	Coilin (p80-coilin)	COIL	1	2	4.7	62.608	1.5796	25.134	2	1.0578	13.581	2	1035	40083
A0A0A0MRW6	Nucleolar protein 6	NOL6	2	7	11.4	112.16	0.97395	19.244	8	1.0579	20.815	8	2725	63998
A0A2R8YFD1	Dynamin-like 120 kDa protein, form S1 (EC 3.6.5.5) (Dynamin-like 120 kDa protein, mitochondrial) (Fragment)	OPA1	13	3	6.7	72.406	1.1874	20.797	2	1.0582	11.803	2	282	74942
P14868	Aspartate--tRNA ligase, cytoplasmic (EC 6.1.1.12) (Aspartyl-tRNA synthetase) (AspRS) (Cell proliferation-inducing gene 40 protein)	DARS1	6	20	48.3	57.136	1.4924	37.139	37	1.0582	22.027	37	725	40818
Q02790	Peptidyl-prolyl cis-trans isomerase FKBP4 (PPIase FKBP4) (EC 5.2.1.8) (51 kDa FK506-binding protein) (FKBP51) (52 kDa FK506-binding protein) (52 kDa FKBP) (FKBP-52) (59 kDa immunophilin) (p59) (FK506-binding protein 4) (FKBP-4) (FKBP59) (HSP-binding immunophilin) (HBI) (Immunophilin FKBP52) (Rotamase) [Cleaved into: Peptidyl-prolyl cis-trans isomerase FKBP4, N-terminally processed]	FKBP4	4	11	33.1	51.804	0.90991	49.726	20	1.0588	25.923	20	1527	22785
A0A3B3ISZ5	Tight junction protein ZO-2	TJP2	14	6	8.6	123.58	1.4909	35.597	2	1.0592	8.7383	2	2954	6939
P67870	Casein kinase II subunit beta (CK II beta) (Phosvitin) (Protein G5a)	CSNK2B	5	4	27.9	24.942	0.93805	27.31	12	1.0596	19.784	12	1439	86867
H0YHS6	Tyrosine--tRNA ligase (EC 6.1.1.1) (Tyrosyl-tRNA synthetase) (Fragment)	YARS2	2	4	18.2	32.184	1.2078	8.8219	6	1.0597	22.08	6	3094	9816
A0A087WXS7	Deleted.	0	3	4	16.3	37.119	0.92656	8.7885	7	1.0601	14.078	7	251	63042
Q99536	Synaptic vesicle membrane protein VAT-1 homolog (EC 1.-.-.-)	VAT1	7	13	38.7	41.92	1.0333	38.861	53	1.0609	22.118	53	2511	3993
C9J144	Catenin alpha-2 (Fragment)	CTNNA2	3	1	27.3	7.1843	1.1141	22.674	4	1.0609	21.926	4	877	120785
P62241	40S ribosomal protein S8 (Small ribosomal subunit protein eS8)	RPS8	2	11	46.6	24.205	1.1781	35.74	66	1.0611	30.196	66	1369	4733
P04075	Fructose-bisphosphate aldolase A (EC 4.1.2.13) (Lung cancer antigen NY-LU-1) (Muscle-type aldolase)	ALDOA	12	33	75	39.42	0.89416	46.014	197	1.0615	26.417	197	531	2397
P40227	T-complex protein 1 subunit zeta (TCP-1-zeta) (Acute morphine dependence-related protein 2) (CCT-zeta-1) (HTR3) (Tcp20)	CCT6A	1	17	42	58.024	1.0612	26.462	87	1.0618	23.426	88	1049	14759
Q13283	Ras GTPase-activating protein-binding protein 1 (G3BP-1) (EC 3.6.4.12) (EC 3.6.4.13) (ATP-dependent DNA helicase VIII) (hDH VIII) (GAP SH3 domain-binding protein 1)	G3BP1	9	10	29.6	52.164	1.1069	25.368	54	1.0619	29.331	54	1636	58276
E9PN17	ATP synthase subunit g, mitochondrial	ATP5MG	4	4	52.6	8.4518	0.9472	24.507	28	1.0625	22.023	28	383	101148
Q9UBU6	Protein FAM8A1 (Autosomal highly conserved protein)	FAM8A1	1	2	8.2	44.123	0.72605	84.879	3	1.0626	24.876	3	2948	179622
P05455	Lupus La protein (La autoantigen) (La ribonucleoprotein) (Sjoegren syndrome type B antigen) (SS-B)	SSB	4	10	29.2	46.836	1.1523	20.596	14	1.0631	14.053	14	558	29458
Q13162	Peroxiredoxin-4 (EC 1.11.1.24) (Antioxidant enzyme AOE372) (AOE37-2) (Peroxiredoxin IV) (Prx-IV) (Thioredoxin peroxidase AO372) (Thioredoxin-dependent peroxide reductase A0372) (Thioredoxin-dependent peroxiredoxin 4)	PRDX4	4	10	48.3	30.54	0.86937	38.047	36	1.0635	22.515	36	1624	42867
Q14152	Eukaryotic translation initiation factor 3 subunit A (eIF3a) (Eukaryotic translation initiation factor 3 subunit 10) (eIF-3-theta) (eIF3 p167) (eIF3 p180) (eIF3 p185)	EIF3A	1	26	23.3	166.57	1.1859	40.531	29	1.0636	28.487	29	1703	13516
Q96N67	Dedicator of cytokinesis protein 7	DOCK7	7	3	2.1	242.56	0.93795	1.1791	2	1.0638	20.887	2	2467	82552
H3BQF7	IST1 homolog (Fragment)	IST1	10	4	26.5	19.013	1.3232	35.102	6	1.064	21.841	6	1260	46799
C9JXB8	60S ribosomal protein L24	RPL24	3	6	35.5	14.369	1.1489	26.14	31	1.0646	19.503	31	1486	11663
P43307	Translocon-associated protein subunit alpha (TRAP-alpha) (Signal sequence receptor subunit alpha) (SSR-alpha)	SSR1	7	3	15.7	32.235	1.339	19.142	11	1.0654	14.237	11	1090	58060
A0A024R4M0	40S ribosomal protein S9	RPS9	6	13	49.5	22.591	1.3692	39.665	68	1.0654	29.59	68	1113	47699
Q9NX20	39S ribosomal protein L16, mitochondrial (L16mt) (MRP-L16) (Mitochondrial large ribosomal subunit protein uL16m)	MRPL16	2	4	19.1	28.449	1	24.368	7	1.0656	27.316	7	2873	81428
O14818	Proteasome subunit alpha type-7 (Proteasome subunit RC6-1) (Proteasome subunit XAPC7)	PSMA7	4	6	33.5	27.887	1.1745	38.442	19	1.0658	28.264	19	168	14168
P49368	T-complex protein 1 subunit gamma (TCP-1-gamma) (CCT-gamma) (hTRiC5)	CCT3	8	28	53.9	60.533	1.115	38.17	116	1.0659	29.437	116	1151	4200
P28072	Proteasome subunit beta type-6 (EC 3.4.25.1) (Macropain delta chain) (Multicatalytic endopeptidase complex delta chain) (Proteasome delta chain) (Proteasome subunit Y)	PSMB6	3	4	17.6	25.357	0.93379	13.473	11	1.0668	9.4331	11	904	106749
P63010	AP-2 complex subunit beta (AP105B) (Adaptor protein complex AP-2 subunit beta) (Adaptor-related protein complex 2 subunit beta) (Beta-2-adaptin) (Beta-adaptin) (Clathrin assembly protein complex 2 beta large chain) (Plasma membrane adaptor HA2/AP2 adaptin beta subunit)	AP2B1	7	12	15.6	104.55	1.3548	67.172	14	1.0668	14.066	14	1423	14772
Q9Y5L4	Mitochondrial import inner membrane translocase subunit Tim13	TIMM13	2	5	53.7	10.5	1.1766	15.113	12	1.0672	17.041	12	3162	111409
P43490	Nicotinamide phosphoribosyltransferase (NAmPRTase) (Nampt) (EC 2.4.2.12) (Pre-B-cell colony-enhancing factor 1) (Pre-B cell-enhancing factor) (Visfatin)	NAMPT	2	6	19.6	55.52	1.2755	16.724	11	1.0677	25.604	11	1092	26036
C9IZG4	Protein CutA	CUTA	2	2	17	14.401	0.75784	126.33	10	1.0682	142.79	10	3232	154982
Q9Y3E5	Peptidyl-tRNA hydrolase 2, mitochondrial (PTH 2) (EC 3.1.1.29) (Bcl-2 inhibitor of transcription 1)	PTRH2	2	4	34.6	19.193	1.3798	16.536	4	1.0683	18.04	4	3122	185303
Q96PK6	RNA-binding protein 14 (Paraspeckle protein 2) (PSP2) (RNA-binding motif protein 14) (RRM-containing coactivator activator/modulator) (Synaptotagmin-interacting protein) (SYT-interacting protein)	RBM14	5	8	20.2	69.491	1.2989	19.894	5	1.0686	8.5982	5	2476	19578
O60493	Sorting nexin-3 (Protein SDP3)	SNX3	3	2	13	18.762	1.2657	26.573	6	1.0689	23.529	6	288	64661
Q99959	Plakophilin-2	PKP2	2	3	6	97.414	1.0153	27.836	3	1.0693	16.197	3	2544	34410
P49207	60S ribosomal protein L34 (Large ribosomal subunit protein eL34)	RPL34	1	6	36.8	13.293	1.2056	45.01	19	1.0693	48.518	19	1145	7296
C9J979	Cleavage and polyadenylation-specific factor 3-like protein (Integrator complex subunit 11) (Fragment)	INTS11	6	2	5.5	38.987	1.1292	12.592	2	1.07	6.7573	2	1942	113907
Q96C86	m7GpppX diphosphatase (EC 3.6.1.59) (DCS-1) (Decapping scavenger enzyme) (Hint-related 7meGMP-directed hydrolase) (Histidine triad nucleotide-binding protein 5) (Histidine triad protein member 5) (HINT-5) (Scavenger mRNA-decapping enzyme DcpS)	DCPS	2	2	5.9	38.608	1.3146	16.746	5	1.0703	28.377	5	2385	125934
Q9UNS2	COP9 signalosome complex subunit 3 (SGN3) (Signalosome subunit 3) (JAB1-containing signalosome subunit 3)	COPS3	7	3	10.4	47.873	1.205	11.834	12	1.0708	11.59	12	3040	16415
Q9C0C9	(E3-independent) E2 ubiquitin-conjugating enzyme (EC 2.3.2.24) (E2/E3 hybrid ubiquitin-protein ligase UBE2O) (Ubiquitin carrier protein O) (Ubiquitin-conjugating enzyme E2 O) (Ubiquitin-conjugating enzyme E2 of 230 kDa) (Ubiquitin-conjugating enzyme E2-230K) (Ubiquitin-protein ligase O)	UBE2O	2	5	5.9	141.29	0.97399	18.058	7	1.0712	23.05	7	2660	1848
Q99832	T-complex protein 1 subunit eta (TCP-1-eta) (CCT-eta) (HIV-1 Nef-interacting protein) [Cleaved into: T-complex protein 1 subunit eta, N-terminally processed]	CCT7	4	21	44.9	59.366	1.0334	26.764	124	1.0712	16.324	124	2537	13225
Q9P035	Very-long-chain (3R)-3-hydroxyacyl-CoA dehydratase 3 (EC 4.2.1.134) (3-hydroxyacyl-CoA dehydratase 3) (HACD3) (Butyrate-induced protein 1) (B-ind1) (hB-ind1) (Protein-tyrosine phosphatase-like A domain-containing protein 1)	HACD3	5	6	20.7	43.159	1.3868	27.162	14	1.0718	28.424	14	2916	59969
Q6FI81	Anamorsin (Cytokine-induced apoptosis inhibitor 1) (Fe-S cluster assembly protein DRE2 homolog)	CIAPIN1	7	7	33.7	33.582	0.85108	7.6955	3	1.072	18.58	3	1972	27130
A0A075B6E5	Protein enabled homolog (Fragment)	ENAH	3	1	5.6	24.92	1.0189	22.741	2	1.0721	27.207	2	2182	226758
O60664	Perilipin-3 (47 kDa mannose 6-phosphate receptor-binding protein) (47 kDa MPR-binding protein) (Cargo selection protein TIP47) (Mannose-6-phosphate receptor-binding protein 1) (Placental protein 17) (PP17)	PLIN3	5	12	49.1	47.074	0.88483	25.818	57	1.0723	15.849	57	295	32462
Q02127	Dihydroorotate dehydrogenase (quinone), mitochondrial (DHOdehase) (EC 1.3.5.2) (Dihydroorotate oxidase)	DHODH	5	3	10.4	42.867	0.89085	25.22	5	1.0732	42.543	5	1520	61331
E5RJ47	U6 snRNA-associated Sm-like protein LSm1	LSM1	3	1	38.6	4.9167	0.88599	16.88	4	1.0734	15.111	4	189	143468
P23526	Adenosylhomocysteinase (AdoHcyase) (EC 3.3.1.1) (S-adenosyl-L-homocysteine hydrolase)	AHCY	1	21	47.7	47.716	1.1669	34.068	123	1.0736	19.807	123	853	8340
P39023	60S ribosomal protein L3 (HIV-1 TAR RNA-binding protein B) (TARBP-B) (Large ribosomal subunit protein uL3)	RPL3	7	20	42.7	46.108	1.1584	33.288	98	1.0746	22.152	98	1042	7333
O75439	Mitochondrial-processing peptidase subunit beta (EC 3.4.24.64) (Beta-MPP) (P-52)	PMPCB	5	7	19	54.366	0.91349	18.591	11	1.0748	28.476	11	350	60898
Q92990	Glomulin (FK506-binding protein-associated protein) (FAP) (FKBP-associated protein)	GLMN	2	3	3.7	68.207	0.69908	66.511	2	1.0749	3.1132	2	2347	24785
Q9Y3F4	Serine-threonine kinase receptor-associated protein (MAP activator with WD repeats) (UNR-interacting protein) (WD-40 repeat protein PT-WD)	STRAP	2	9	34.9	38.438	1.1066	19.503	22	1.075	17.627	22	3123	60404
Q15046	Lysine--tRNA ligase (EC 2.7.7.-) (EC 6.1.1.6) (Lysyl-tRNA synthetase) (LysRS)	KARS1	5	17	34.2	68.047	0.97867	30.878	33	1.076	22.482	33	1771	3549
P50990	T-complex protein 1 subunit theta (TCP-1-theta) (CCT-theta) (Chaperonin containing T-complex polypeptide 1 subunit 8) (Renal carcinoma antigen NY-REN-15)	CCT8	3	28	51.1	59.62	1.0063	38.115	117	1.0766	23.684	117	1195	9637
P35754	Glutaredoxin-1 (Thioltransferase-1) (TTase-1)	GLRX	1	5	46.2	11.776	1.4639	44.483	17	1.0767	23.329	17	1011	19014
G8JLD5	Dynamin-1-like protein (EC 3.6.5.5) (Dnm1p/Vps1p-like protein) (DVLP) (Dynamin family member proline-rich carboxyl-terminal domain less) (Dymple) (Dynamin-like protein) (Dynamin-like protein 4) (Dynamin-like protein IV) (HdynIV) (Dynamin-related protein 1)	DNM1L	10	4	9.6	79.621	1.1786	44.645	3	1.0778	8.527	3	130	56499
P09661	U2 small nuclear ribonucleoprotein A' (U2 snRNP A')	SNRPA1	4	6	26.7	28.415	1.8966	36.498	15	1.0778	30.401	15	634	67179
Q9UKK9	ADP-sugar pyrophosphatase (EC 3.6.1.13) (8-oxo-dGDP phosphatase) (EC 3.6.1.58) (Nuclear ATP-synthesis protein NUDIX5) (EC 2.7.7.96) (Nucleoside diphosphate-linked moiety X motif 5) (Nudix motif 5) (hNUDT5) (YSA1H)	NUDT5	6	6	26.5	24.327	1.2584	29.598	9	1.078	12.214	9	3003	49988
O75955	Flotillin-1	FLOT1	15	5	15.5	47.355	0.76469	13.588	7	1.0782	19.816	7	382	97569
P63173	60S ribosomal protein L38 (Large ribosomal subunit protein eL38)	RPL38	1	2	17.1	8.2178	0.9063	30.339	6	1.0783	19.879	6	1429	119203
O60749	Sorting nexin-2 (Transformation-related gene 9 protein) (TRG-9)	SNX2	2	4	8.7	58.47	1.0646	7.3942	3	1.0792	16.103	3	300	15058
P07099	Epoxide hydrolase 1 (EC 3.3.2.9) (Epoxide hydratase) (Microsomal epoxide hydrolase) (mEH)	EPHX1	3	12	24.8	52.948	1.8157	39.606	33	1.0799	28.579	33	578	38892
K7EM56	40S ribosomal protein S15	RPS15	8	4	40.2	12.99	0.92201	34.889	8	1.0804	22.322	8	1401	35711
O95453	Poly(A)-specific ribonuclease PARN (EC 3.1.13.4) (Deadenylating nuclease) (Deadenylation nuclease) (Polyadenylate-specific ribonuclease)	PARN	3	3	7.4	73.45	1.2074	21.132	3	1.0805	23.937	3	439	61525
E9PGZ4	Phosphatidylinositol-3-phosphatase SAC1	SACM1L	5	4	10.1	55.571	1.2575	32.437	2	1.0805	6.1762	2	2831	73424
Q8TEB1	DDB1- and CUL4-associated factor 11 (WD repeat-containing protein 23)	DCAF11	5	2	7.1	61.669	1.2923	24.09	3	1.0805	11.082	3	2254	60414
A0A0A0MR02	Outer mitochondrial membrane protein porin 2 (Voltage-dependent anion-selective channel protein 2) (Fragment)	VDAC2	5	12	56	30.348	1.0197	32.924	86	1.081	23.715	86	1095	22997
O14737	Programmed cell death protein 5 (TF-1 cell apoptosis-related protein 19) (Protein TFAR19)	PDCD5	5	6	45.6	14.285	1.175	10.984	15	1.0813	15.88	15	162	4472
O43707	Alpha-actinin-4 (Non-muscle alpha-actinin 4)	ACTN4	4	40	54.7	104.85	1.0247	24.248	174	1.0815	34.239	174	253	4161
Q92665	28S ribosomal protein S31, mitochondrial (MRP-S31) (S31mt) (Imogen 38) (Mitochondrial small ribosomal subunit protein mS31)	MRPS31	1	4	17.2	45.318	0.82847	16.061	7	1.0821	11.666	7	2316	83719
Q96C01	Protein FAM136A	FAM136A	4	4	30.4	15.641	1.0222	22.112	9	1.0822	14.359	9	2381	6264
Q8WVC2	40S ribosomal protein S21	RPS21	4	5	65.4	8.85	0.98647	30.17	32	1.0824	20.112	32	1431	32412
P55036	26S proteasome non-ATPase regulatory subunit 4 (26S proteasome regulatory subunit RPN10) (26S proteasome regulatory subunit S5A) (Antisecretory factor 1) (AF) (ASF) (Multiubiquitin chain-binding protein)	PSMD4	6	9	38.2	40.736	0.91841	16.695	21	1.0826	16.283	21	1276	372
H0YHA7	60S ribosomal protein L18 (Fragment)	RPL18	7	7	43.7	18.863	1	18.243	116	1.0827	60.423	117	1561	17757
Q9Y305	Acyl-coenzyme A thioesterase 9, mitochondrial (Acyl-CoA thioesterase 9) (EC 3.1.2.-) (Acyl-CoA thioester hydrolase 9)	ACOT9	3	5	15.5	49.901	0.91592	18.923	5	1.0832	15.921	5	3095	37622
E9PNF5	Glutamine-dependent NAD(+) synthetase (Fragment)	NADSYN1	3	1	8.1	16.147	0.67208	31.392	2	1.0833	28.634	2	1975	173325
Q9UHG3	Prenylcysteine oxidase 1 (EC 1.8.3.5) (Prenylcysteine lyase)	PCYOX1	5	6	13.7	56.639	1.5485	24.474	25	1.0835	26.699	25	2973	46354
Q15067	Peroxisomal acyl-coenzyme A oxidase 1 (AOX) (EC 1.3.3.6) (Palmitoyl-CoA oxidase) (Straight-chain acyl-CoA oxidase) (SCOX) [Cleaved into: Peroxisomal acyl-CoA oxidase 1, A chain; Peroxisomal acyl-CoA oxidase 1, B chain; Peroxisomal acyl-CoA oxidase 1, C chain]	ACOX1	4	7	18.3	74.423	1.0286	27.31	12	1.0838	17.538	12	1776	7582
Q9HC07	Transmembrane protein 165 (Transmembrane protein PT27) (Transmembrane protein TPARL)	TMEM165	4	3	19.4	34.905	0.8885	22.734	8	1.084	17.986	8	2755	122272
Q14696	LRP chaperone MESD (LDLR chaperone MESD) (Mesoderm development LRP chaperone MESD) (Mesoderm development candidate 2) (Mesoderm development protein) (Renal carcinoma antigen NY-REN-61)	MESD	1	3	13.7	26.076	0.91497	26.456	5	1.0847	17.691	5	1741	27084
Q13185	Chromobox protein homolog 3 (HECH) (Heterochromatin protein 1 homolog gamma) (HP1 gamma) (Modifier 2 protein)	CBX3	8	4	30.1	20.811	1.0933	17.398	8	1.0847	18.984	8	1626	87763
Q13618	Cullin-3 (CUL-3)	CUL3	3	5	6.6	88.929	0.98435	41.25	11	1.0848	17.564	11	1677	14861
B5MCF9	Pescadillo homolog	PES1	3	5	14.4	66.077	0.94859	21.156	12	1.085	19.96	12	138	7993
E9PGZ1	Caldesmon	CALD1	3	4	10.3	61.705	1.0304	19.7	8	1.0855	21.441	8	3238	43827
P31946	14-3-3 protein beta/alpha (Protein 1054) (Protein kinase C inhibitor protein 1) (KCIP-1) [Cleaved into: 14-3-3 protein beta/alpha, N-terminally processed]	YWHAB	4	16	56.1	28.082	1.1588	42.604	38	1.0859	25.678	38	964	36575
O43747	AP-1 complex subunit gamma-1 (Adaptor protein complex AP-1 subunit gamma-1) (Adaptor-related protein complex 1 subunit gamma-1) (Clathrin assembly protein complex 1 gamma-1 large chain) (Gamma1-adaptin) (Golgi adaptor HA1/AP1 adaptin subunit gamma-1)	AP1G1	4	3	5.7	91.35	1.2893	46.808	4	1.0859	6.074	4	256	106122
P08754	Guanine nucleotide-binding protein G(i) subunit alpha (G(i) alpha-3)	GNAI3	19	4	15.8	40.532	0.92595	5.1732	5	1.0863	6.9584	5	614	46323
P26639	Threonine--tRNA ligase 1, cytoplasmic (EC 6.1.1.3) (Threonyl-tRNA synthetase) (ThrRS) (Threonyl-tRNA synthetase 1)	TARS1	4	8	14.5	83.434	1.0244	26.841	19	1.0866	35.336	19	883	6252
E5RGS4	Prefoldin subunit 1	PFDN1	3	3	23.9	13.466	0.89134	18.541	7	1.0867	12.821	7	313	2339
Q08426	Peroxisomal bifunctional enzyme (PBE) (PBFE) (L-bifunctional protein) (LBP) (Multifunctional enzyme 1) (MFE1) [Includes: Enoyl-CoA hydratase/3,2-trans-enoyl-CoA isomerase (EC 4.2.1.17) (EC 5.3.3.8); 3-hydroxyacyl-CoA dehydrogenase (EC 1.1.1.35)]	EHHADH	2	5	10.7	79.494	1.4494	21.625	10	1.0873	21.061	10	1574	121005
O00629	Importin subunit alpha-3 (Importin alpha Q1) (Qip1) (Karyopherin subunit alpha-4)	KPNA4	2	4	18.8	57.886	0.92371	7.1372	2	1.0874	42.497	2	145	25467
Q15075	Early endosome antigen 1 (Endosome-associated protein p162) (Zinc finger FYVE domain-containing protein 2)	EEA1	1	12	11.7	162.46	0.93078	6.3441	8	1.0874	14.939	8	1777	2445
O43765	Small glutamine-rich tetratricopeptide repeat-containing protein alpha (Alpha-SGT) (Vpu-binding protein) (UBP)	SGTA	2	4	16	34.063	0.99137	15.674	7	1.0874	27.686	7	258	10526
J3KNQ3	26S proteasome non-ATPase regulatory subunit 13 (26S proteasome regulatory subunit RPN9) (26S proteasome regulatory subunit S11) (26S proteasome regulatory subunit p40.5)	PSMD13	4	6	23.5	39.829	1.1695	22.586	33	1.0876	17.042	33	3038	51036
P12004	Proliferating cell nuclear antigen (PCNA) (Cyclin)	PCNA	1	11	55.9	28.768	0.9945	15.189	87	1.0877	22.848	87	683	5819
Q9Y2L6	FERM domain-containing protein 4B (GRP1-binding protein GRSP1)	FRMD4B	6	2	2.4	118.05	1.0595	53.276	4	1.088	17.273	4	3078	48620
P60228	Eukaryotic translation initiation factor 3 subunit E (eIF3e) (Eukaryotic translation initiation factor 3 subunit 6) (Viral integration site protein INT-6 homolog) (eIF-3 p48)	EIF3E	6	10	27.9	52.22	1.6104	49.909	17	1.0887	22.748	17	1308	115553
P20073	Annexin A7 (Annexin VII) (Annexin-7) (Synexin)	ANXA7	1	5	15	52.739	0.99357	24.067	14	1.0888	13.744	14	799	65858
P62195	26S proteasome regulatory subunit 8 (26S proteasome AAA-ATPase subunit RPT6) (Proteasome 26S subunit ATPase 5) (Proteasome subunit p45) (Thyroid hormone receptor-interacting protein 1) (TRIP1) (p45/SUG)	PSMC5	10	8	26.4	45.626	1.2881	54.118	26	1.089	26.658	26	1368	12946
Q9UI12	V-type proton ATPase subunit H (V-ATPase subunit H) (Nef-binding protein 1) (NBP1) (Protein VMA13 homolog) (V-ATPase 50/57 kDa subunits) (Vacuolar proton pump subunit H) (Vacuolar proton pump subunit SFD)	ATP6V1H	6	2	7	55.882	0.84894	14.267	4	1.0894	13.112	4	2982	64117
H0YMZ1	Proteasome subunit alpha type (EC 3.4.25.1) (Fragment)	PSMA4	11	8	46.4	24.526	1.1409	29.593	29	1.0898	16.632	29	874	22317
Q96SB4	SRSF protein kinase 1 (EC 2.7.11.1) (SFRS protein kinase 1) (Serine/arginine-rich protein-specific kinase 1) (SR-protein-specific kinase 1)	SRPK1	11	5	8.9	74.324	1.2834	40.639	6	1.0907	18.033	6	2490	77349
Q02543	60S ribosomal protein L18a (Large ribosomal subunit protein eL20)	RPL18A	5	8	44.9	20.762	1.0561	20.005	53	1.0917	35.715	53	1525	9828
P07108	Acyl-CoA-binding protein (ACBP) (Diazepam-binding inhibitor) (DBI) (Endozepine) (EP)	DBI	3	3	43.7	10.044	1.0369	28.867	29	1.0921	17.242	29	579	26886
C9JNZ1	UTP--glucose-1-phosphate uridylyltransferase (Fragment)	UGP2	9	9	55.7	24.235	1.45	19.744	4	1.0925	12.854	4	3233	70079
O95782	AP-2 complex subunit alpha-1 (100 kDa coated vesicle protein A) (Adaptor protein complex AP-2 subunit alpha-1) (Adaptor-related protein complex 2 subunit alpha-1) (Alpha-adaptin A) (Alpha1-adaptin) (Clathrin assembly protein complex 2 alpha-A large chain) (Plasma membrane adaptor HA2/AP2 adaptin alpha A subunit)	AP2A1	1	8	14.2	107.54	0.92843	23.576	5	1.0927	69.019	5	459	21499
P47914	60S ribosomal protein L29 (Cell surface heparin-binding protein HIP) (Large ribosomal subunit protein eL29)	RPL29	2	2	14.5	17.752	0.90344	16.41	33	1.0934	19.311	33	1126	18688
Q5JNW7	Proteasome endopeptidase complex (EC 3.4.25.1)	PSMB8	4	1	4	27.85	1.1535	20.015	5	1.0939	10.121	5	901	123025
C9J9K3	40S ribosomal protein SA (Fragment)	RPSA	4	10	45.6	29.404	1.0883	28.759	124	1.0941	24.6	124	617	4750
Q99471	Prefoldin subunit 5 (Myc modulator 1) (c-Myc-binding protein Mm-1)	PFDN5	5	4	42.9	17.328	1.0709	37.727	10	1.0943	20.245	10	2507	19695
P15374	Ubiquitin carboxyl-terminal hydrolase isozyme L3 (UCH-L3) (EC 3.4.19.12) (Ubiquitin thioesterase L3)	UCHL3	3	5	32.2	26.182	1.0075	7.4502	5	1.0949	17.467	5	734	57109
O76024	Wolframin	WFS1	1	9	12.8	100.29	1.829	56.134	5	1.0949	17.688	5	387	4722
P61586	Transforming protein RhoA (EC 3.6.5.2) (Rho cDNA clone 12) (h12)	RHOA	1	4	18.1	21.768	0.80866	9.2756	9	1.0955	10.694	9	1348	51819
Q6YP21	Kynurenine--oxoglutarate transaminase 3 (EC 2.6.1.7) (Cysteine-S-conjugate beta-lyase 2) (EC 4.4.1.13) (Kynurenine aminotransferase 3) (Kynurenine aminotransferase III) (KATIII) (Kynurenine--glyoxylate transaminase) (EC 2.6.1.63) (Kynurenine--oxoglutarate transaminase III)	KYAT3	2	9	26.2	51.4	0.96947	4.6136	2	1.096	2.24	2	2024	10939
O75131	Copine-3 (Copine III)	CPNE3	15	8	23.6	60.13	1.0212	23.287	7	1.0963	11.439	7	319	33406
Q9UMS0	NFU1 iron-sulfur cluster scaffold homolog, mitochondrial (HIRA-interacting protein 5)	NFU1	4	3	15.4	28.462	0.92234	26.668	7	1.0967	8.5917	7	3027	56412
D6RCD0	Estradiol 17-beta-dehydrogenase 11	HSD17B11	2	8	32	28.102	1.2012	30.005	39	1.0973	26.023	39	2192	52833
P60709	Actin, cytoplasmic 1 (Beta-actin) [Cleaved into: Actin, cytoplasmic 1, N-terminally processed]	ACTB	7	29	75.2	41.736	0.89997	10.738	29	1.0976	9.7636	29	1313	8026
D6R918	OCIA domain-containing protein 1 (Fragment)	OCIAD1	8	1	24.7	8.2873	0.99188	8.3725	5	1.0981	10.837	5	2875	178636
Q13564	NEDD8-activating enzyme E1 regulatory subunit (Amyloid beta precursor protein-binding protein 1, 59 kDa) (APP-BP1) (Amyloid protein-binding protein 1) (Proto-oncogene protein 1)	NAE1	2	3	9	60.246	1.208	33.866	7	1.0984	21.826	7	1669	119844
Q5W011	Splicing factor 45 (Fragment)	RBM17	4	3	19.3	24.176	0.94519	6.4746	5	1.0989	13.51	5	2438	122772
P53999	Activated RNA polymerase II transcriptional coactivator p15 (Positive cofactor 4) (PC4) (SUB1 homolog) (p14)	SUB1	1	5	37.8	14.395	1.137	17.06	29	1.0993	17.366	29	1262	30420
Q9NUU7	ATP-dependent RNA helicase DDX19A (EC 3.6.4.13) (DDX19-like protein) (DEAD box protein 19A)	DDX19A	8	10	27	53.974	1.071	15.573	14	1.1003	37.978	14	2849	2449
Q96EL3	39S ribosomal protein L53, mitochondrial (L53mt) (MRP-L53) (Mitochondrial large ribosomal subunit protein mL53)	MRPL53	2	2	16.1	12.107	0.82857	3.7679	3	1.1006	27.406	3	2403	183538
Q02318	Sterol 26-hydroxylase, mitochondrial (EC 1.14.15.15) (5-beta-cholestane-3-alpha,7-alpha,12-alpha-triol 26-hydroxylase) (Cytochrome P-450C27/25) (Cytochrome P450 27) (Sterol 27-hydroxylase) (Vitamin D(3) 25-hydroxylase)	CYP27A1	1	5	10	60.234	0.86284	23.59	10	1.1006	13.08	10	1523	45373
Q9Y291	28S ribosomal protein S33, mitochondrial (MRP-S33) (S33mt) (Mitochondrial small ribosomal subunit protein mS33)	MRPS33	2	3	28.3	12.629	0.75018	24.55	6	1.1007	14.375	6	3070	113754
P26885	Peptidyl-prolyl cis-trans isomerase FKBP2 (PPIase FKBP2) (EC 5.2.1.8) (13 kDa FK506-binding protein) (13 kDa FKBP) (FKBP-13) (FK506-binding protein 2) (FKBP-2) (Immunophilin FKBP13) (Rotamase)	FKBP2	2	2	18.3	15.649	0.97056	10.079	12	1.1007	13.47	12	886	76101
H7C003	Protein phosphatase 1 regulatory subunit 7 (Fragment)	PPP1R7	7	4	13.4	38.633	1.5948	22.359	4	1.1032	13.597	4	1812	114062
F8W8D4	NEDD8-activating enzyme E1 catalytic subunit (NEDD8-activating enzyme E1C) (Ubiquitin-activating enzyme E1C) (Ubiquitin-like modifier-activating enzyme 3)	UBA3	2	2	9	47.271	1.0393	7.8575	2	1.1034	11.207	2	2241	103106
Q99460	26S proteasome non-ATPase regulatory subunit 1 (26S proteasome regulatory subunit RPN2) (26S proteasome regulatory subunit S1) (26S proteasome subunit p112)	PSMD1	6	18	29.8	105.84	1.0099	35.425	30	1.1037	31.515	30	2505	38455
Q9Y3L5	Ras-related protein Rap-2c (EC 3.6.5.2)	RAP2C	4	2	10.9	20.745	3.4827	72.472	15	1.1038	36.987	15	3126	217838
P07737	Profilin-1 (Epididymis tissue protein Li 184a) (Profilin I)	PFN1	4	10	89.3	15.054	1.1986	46.372	101	1.1044	36.547	101	590	9491
Q15006	ER membrane protein complex subunit 2 (Tetratricopeptide repeat protein 35) (TPR repeat protein 35)	EMC2	2	3	14.8	34.833	1.3057	4.8176	3	1.1044	28.918	3	1759	24779
P41091	Eukaryotic translation initiation factor 2 subunit 3 (EC 3.6.5.3) (Eukaryotic translation initiation factor 2 subunit gamma X) (eIF-2-gamma X) (eIF-2gX)	EIF2S3	3	11	32.2	51.109	1.0316	21.177	47	1.1048	28.041	47	1060	8140
P16615	Sarcoplasmic/endoplasmic reticulum calcium ATPase 2 (SERCA2) (SR Ca(2+)-ATPase 2) (EC 7.2.2.10) (Calcium pump 2) (Calcium-transporting ATPase sarcoplasmic reticulum type, slow twitch skeletal muscle isoform) (Endoplasmic reticulum class 1/2 Ca(2+) ATPase)	ATP2A2	8	17	24.2	114.76	1.081	22.382	46	1.1048	36.225	46	754	11996
P26641	Elongation factor 1-gamma (EF-1-gamma) (eEF-1B gamma)	EEF1G	1	18	36.2	50.118	1.2061	30.829	83	1.1049	25.701	82	885	626
P48449	Lanosterol synthase (EC 5.4.99.7) (2,3-epoxysqualene--lanosterol cyclase) (Oxidosqualene--lanosterol cyclase) (OSC) (hOSC)	LSS	4	4	7.4	83.308	0.91436	30.928	2	1.1053	4.9741	2	1132	50006
P62753	40S ribosomal protein S6 (Phosphoprotein NP33) (Small ribosomal subunit protein eS6)	RPS6	3	9	32.5	28.68	1.3384	39.245	47	1.1053	17.098	47	1394	32966
P78371	T-complex protein 1 subunit beta (TCP-1-beta) (CCT-beta)	CCT2	3	27	62.2	57.488	1.0895	21.596	109	1.1054	22.105	110	1460	1520
Q13033	Striatin-3 (Cell cycle autoantigen SG2NA) (S/G2 antigen)	STRN3	3	6	13.4	87.208	1.018	28.223	5	1.1063	31.277	5	1610	12472
P26373	60S ribosomal protein L13 (Breast basic conserved protein 1) (Large ribosomal subunit protein eL13)	RPL13	3	12	50.7	24.261	1.043	40.657	96	1.1063	31.786	95	879	66290
Q9NZL9	Methionine adenosyltransferase 2 subunit beta (Methionine adenosyltransferase II beta) (MAT II beta) (Putative dTDP-4-keto-6-deoxy-D-glucose 4-reductase)	MAT2B	3	2	7.5	37.551	1.1281	25.503	7	1.1063	16.271	7	2909	25743
P62979	Ubiquitin-40S ribosomal protein S27a (Ubiquitin carboxyl extension protein 80) [Cleaved into: Ubiquitin; 40S ribosomal protein S27a (Small ribosomal subunit protein eS31)]	RPS27A	24	7	50.6	17.965	1.1766	22.888	73	1.1065	19.833	73	1419	27168
Q9H9Q2	COP9 signalosome complex subunit 7b (SGN7b) (Signalosome subunit 7b) (JAB1-containing signalosome subunit 7b)	COPS7B	12	4	20.5	29.622	1.0136	28.339	3	1.1066	20.61	3	2745	7996
P28070	Proteasome subunit beta type-4 (EC 3.4.25.1) (26 kDa prosomal protein) (HsBPROS26) (PROS-26) (Macropain beta chain) (Multicatalytic endopeptidase complex beta chain) (Proteasome beta chain) (Proteasome chain 3) (HsN3)	PSMB4	1	5	23.5	29.204	1.0726	27.287	22	1.1068	23.357	22	903	10918
P32969	60S ribosomal protein L9 (Large ribosomal subunit protein uL6)	RPL9	6	6	35.9	21.863	1.2978	33.857	40	1.1068	26.736	41	972	56926
K7EM02	Katanin p60 ATPase-containing subunit A-like 2 (Fragment)	KATNAL2	3	1	9.4	13.999	0.9409	9.6587	12	1.1069	10.249	12	2143	69852
Q13200	26S proteasome non-ATPase regulatory subunit 2 (26S proteasome regulatory subunit RPN1) (26S proteasome regulatory subunit S2) (26S proteasome subunit p97) (Protein 55.11) (Tumor necrosis factor type 1 receptor-associated protein 2)	PSMD2	5	17	23.8	100.2	1.0776	42.811	35	1.1069	21.968	35	1628	18611
P50502	Hsc70-interacting protein (Hip) (Aging-associated protein 2) (Progesterone receptor-associated p48 protein) (Protein FAM10A1) (Putative tumor suppressor ST13) (Renal carcinoma antigen NY-REN-33) (Suppression of tumorigenicity 13 protein)	ST13	7	8	26	41.331	1.0788	24.806	38	1.1071	19.776	38	1186	10359
P62873	Guanine nucleotide-binding protein G(I)/G(S)/G(T) subunit beta-1 (Transducin beta chain 1)	GNB1	10	9	28.2	37.377	1.111	25.502	21	1.1074	17.759	21	1407	3677
P61019	Ras-related protein Rab-2A	RAB2A	5	4	23.6	23.545	0.99922	28.418	16	1.1075	20.636	16	1323	26698
Q9BYD2	39S ribosomal protein L9, mitochondrial (L9mt) (MRP-L9) (Mitochondrial large ribosomal subunit protein bL9m)	MRPL9	5	4	18	30.243	1.2871	28.275	4	1.1075	39.325	4	2644	16408
P28074	Proteasome subunit beta type-5 (EC 3.4.25.1) (Macropain epsilon chain) (Multicatalytic endopeptidase complex epsilon chain) (Proteasome chain 6) (Proteasome epsilon chain) (Proteasome subunit MB1) (Proteasome subunit X)	PSMB5	2	4	17.1	28.48	1.4503	19.08	13	1.1075	22.573	13	905	11956
P62906	60S ribosomal protein L10a (CSA-19) (Large ribosomal subunit protein uL1) (Neural precursor cell expressed developmentally down-regulated protein 6) (NEDD-6)	RPL10A	1	10	40.6	24.831	0.91974	41.562	107	1.1079	19.631	107	1413	8500
P20290	Transcription factor BTF3 (Nascent polypeptide-associated complex subunit beta) (NAC-beta) (RNA polymerase B transcription factor 3)	BTF3	3	3	23.3	22.168	1.7591	19.091	6	1.1083	17.171	6	800	17958
O14980	Exportin-1 (Exp1) (Chromosome region maintenance 1 protein homolog)	XPO1	10	16	20	123.38	1.1994	28.232	17	1.1084	27.115	17	185	25427
Q04837	Single-stranded DNA-binding protein, mitochondrial (Mt-SSB) (MtSSB) (PWP1-interacting protein 17)	SSBP1	4	4	34.5	17.259	1.2544	26.205	15	1.1086	21.843	15	1545	83144
O00231	26S proteasome non-ATPase regulatory subunit 11 (26S proteasome regulatory subunit RPN6) (26S proteasome regulatory subunit S9) (26S proteasome regulatory subunit p44.5)	PSMD11	3	9	24.6	47.463	1.0775	23.734	44	1.1096	16.019	44	115	449
Q7L8L6	FAST kinase domain-containing protein 5, mitochondrial	FASTKD5	1	5	10.3	86.573	1.0321	31.602	3	1.1104	16.137	3	2048	3268
P05141	ADP/ATP translocase 2 (ADP,ATP carrier protein 2) (ADP,ATP carrier protein, fibroblast isoform) (Adenine nucleotide translocator 2) (ANT 2) (Solute carrier family 25 member 5) [Cleaved into: ADP/ATP translocase 2, N-terminally processed]	SLC25A5	2	16	44	32.852	1.4684	33.162	106	1.1107	22.575	106	548	3607
Q8NI60	Atypical kinase COQ8A, mitochondrial (EC 2.7.-.-) (Chaperone activity of bc1 complex-like) (Chaperone-ABC1-like) (Coenzyme Q protein 8A) (aarF domain-containing protein kinase 3)	COQ8A	1	2	4.3	71.949	0.77868	12.815	10	1.1109	23.329	10	2230	1604
P63167	Dynein light chain 1, cytoplasmic (8 kDa dynein light chain) (DLC8) (Dynein light chain LC8-type 1) (Protein inhibitor of neuronal nitric oxide synthase) (PIN)	DYNLL1	4	2	37.1	10.366	1.0823	16.045	7	1.111	11.209	7	1427	145745
P11216	Glycogen phosphorylase, brain form (EC 2.4.1.1)	PYGB	3	14	21.2	96.695	1.101	28.911	39	1.1112	19.536	39	670	46321
H3BR35	Eukaryotic peptide chain release factor GTP-binding subunit ERF3A (Fragment)	GSPT1	4	12	27.8	52.832	1.6606	55.395	18	1.1114	31.858	18	731	32675
Q86U42	Polyadenylate-binding protein 2 (PABP-2) (Poly(A)-binding protein 2) (Nuclear poly(A)-binding protein 1) (Poly(A)-binding protein II) (PABII) (Polyadenylate-binding nuclear protein 1)	PABPN1	4	4	30.4	32.749	0.91396	10.79	7	1.1123	26.189	7	2088	14
P62191	26S proteasome regulatory subunit 4 (P26s4) (26S proteasome AAA-ATPase subunit RPT2) (Proteasome 26S subunit ATPase 1)	PSMC1	2	11	30	49.184	1.1511	27.317	38	1.1126	18.423	37	1367	10301
Q9H4M9	EH domain-containing protein 1 (PAST homolog 1) (hPAST1) (Testilin)	EHD1	8	10	25.8	60.626	1.0348	37.212	14	1.1133	30.25	14	2717	5358
O95470	Sphingosine-1-phosphate lyase 1 (S1PL) (SP-lyase 1) (SPL 1) (hSPL) (EC 4.1.2.27) (Sphingosine-1-phosphate aldolase)	SGPL1	1	2	7.2	63.523	0.91066	1.4481	2	1.1139	31.441	2	441	153576
Q07065	Cytoskeleton-associated protein 4 (63-kDa cytoskeleton-linking membrane protein) (Climp-63) (p63)	CKAP4	1	21	42.5	66.022	0.85394	24.992	70	1.114	22.347	70	1563	21821
P18085	ADP-ribosylation factor 4	ARF4	10	4	27.2	20.511	1.1687	16.501	6	1.1146	19.645	6	776	92056
P28838	Cytosol aminopeptidase (EC 3.4.11.1) (Cysteinylglycine-S-conjugate dipeptidase) (EC 3.4.13.23) (Leucine aminopeptidase 3) (LAP-3) (Leucyl aminopeptidase) (Peptidase S) (Proline aminopeptidase) (EC 3.4.11.5) (Prolyl aminopeptidase)	LAP3	3	20	45.7	56.166	0.97569	24.864	58	1.1156	17.083	58	913	5266
P36507	Dual specificity mitogen-activated protein kinase kinase 2 (MAP kinase kinase 2) (MAPKK 2) (EC 2.7.12.2) (ERK activator kinase 2) (MAPK/ERK kinase 2) (MEK 2)	MAP2K2	5	6	23	44.424	1.0917	10.432	5	1.1156	21.28	5	1016	38987
H0Y6T7	Nicastrin (Fragment)	NCSTN	4	2	8.4	30.045	1.3302	19.143	4	1.1159	5.5097	4	2301	12457
P60842	Eukaryotic initiation factor 4A-I (eIF-4A-I) (eIF4A-I) (EC 3.6.4.13) (ATP-dependent RNA helicase eIF4A-1)	EIF4A1	17	16	41.6	46.153	1.3949	36.573	107	1.1162	33.497	107	1314	10987
P10619	Lysosomal protective protein (EC 3.4.16.5) (Carboxypeptidase C) (Carboxypeptidase L) (Cathepsin A) (Protective protein cathepsin A) (PPCA) (Protective protein for beta-galactosidase) [Cleaved into: Lysosomal protective protein 32 kDa chain; Lysosomal protective protein 20 kDa chain]	CTSA	4	5	11.5	54.465	1.2711	50.603	12	1.1168	15.276	12	654	28041
P04066	Tissue alpha-L-fucosidase (EC 3.2.1.51) (Alpha-L-fucosidase I) (Alpha-L-fucoside fucohydrolase 1) (Alpha-L-fucosidase 1)	FUCA1	1	1	2.4	53.688	1.0721	5.8854	4	1.1179	1.5316	4	530	35198
O14672	Disintegrin and metalloproteinase domain-containing protein 10 (ADAM 10) (EC 3.4.24.81) (CDw156) (Kuzbanian protein homolog) (Mammalian disintegrin-metalloprotease) (CD antigen CD156c)	ADAM10	2	4	10	84.141	1.07	3.8567	2	1.1182	17.735	2	160	10372
P20340	Ras-related protein Rab-6A (Rab-6)	RAB6A	8	4	21.6	23.593	1.4709	25.726	24	1.119	18.971	24	802	127339
P18124	60S ribosomal protein L7 (Large ribosomal subunit protein uL30)	RPL7	4	15	46.8	29.225	1.11	22.131	69	1.1196	23.401	69	777	8944
Q99805	Transmembrane 9 superfamily member 2 (p76)	TM9SF2	1	3	7.8	75.775	1.3767	15.172	3	1.1197	18.73	3	2534	53732
Q8TCJ2	Dolichyl-diphosphooligosaccharide--protein glycosyltransferase subunit STT3B (Oligosaccharyl transferase subunit STT3B) (STT3-B) (EC 2.4.99.18) (Source of immunodominant MHC-associated peptides homolog)	STT3B	1	3	5.2	93.673	0.94732	35.285	2	1.1203	43.02	2	2243	9244
P04844	Dolichyl-diphosphooligosaccharide--protein glycosyltransferase subunit 2 (Dolichyl-diphosphooligosaccharide--protein glycosyltransferase 63 kDa subunit) (RIBIIR) (Ribophorin II) (RPN-II) (Ribophorin-2)	RPN2	6	14	30.3	69.283	1.1283	49.335	51	1.1213	28.521	51	541	43723
P62829	60S ribosomal protein L23 (60S ribosomal protein L17) (Large ribosomal subunit protein uL14)	RPL23	6	11	49.3	14.865	1.2071	46.139	79	1.1214	20.68	79	1399	42180
P42224	Signal transducer and activator of transcription 1-alpha/beta (Transcription factor ISGF-3 components p91/p84)	STAT1	7	10	18.1	87.334	0.94284	17.676	17	1.1216	26.213	17	1073	48198
A0A3B3ISG5	Insulin-degrading enzyme	IDE	2	5	6	117.94	1.1926	17.075	5	1.1238	14.837	5	721	7096
P23396	40S ribosomal protein S3 (EC 4.2.99.18) (Small ribosomal subunit protein uS3)	RPS3	14	20	70	26.688	1.2188	36.561	97	1.1243	28.603	97	850	4210
Q9H2P0	Activity-dependent neuroprotector homeobox protein (Activity-dependent neuroprotective protein)	ADNP	5	4	6.9	123.56	0.84187	30.659	2	1.1249	46.725	2	2694	84566
P23381	Tryptophan--tRNA ligase, cytoplasmic (EC 6.1.1.2) (Interferon-induced protein 53) (IFP53) (Tryptophanyl-tRNA synthetase) (TrpRS) (hWRS) [Cleaved into: T1-TrpRS; T2-TrpRS]	WARS1	4	6	16.3	53.165	1.3198	22.636	8	1.1252	29.384	8	849	35145
O00410	Importin-5 (Imp5) (Importin subunit beta-3) (Karyopherin beta-3) (Ran-binding protein 5) (RanBP5)	IPO5	18	20	26.3	123.63	1.4672	36.311	63	1.1252	23.267	63	127	10852
Q9HBH1	Peptide deformylase, mitochondrial (EC 3.5.1.88) (Polypeptide deformylase)	PDF	1	3	17.7	27.013	0.79695	15.778	8	1.1257	21.834	8	2753	28522
Q9Y262	Eukaryotic translation initiation factor 3 subunit L (eIF3l) (Eukaryotic translation initiation factor 3 subunit 6-interacting protein) (Eukaryotic translation initiation factor 3 subunit E-interacting protein)	EIF3L	6	7	18.1	66.726	1.27	22.579	18	1.1257	24.463	18	3062	57969
P17987	T-complex protein 1 subunit alpha (TCP-1-alpha) (CCT-alpha)	TCP1	11	24	53.1	60.343	1.0655	22.666	113	1.1259	19.319	113	772	7083
F8VYE8	Serine/threonine-protein phosphatase (EC 3.1.3.16)	PPP1CC	4	5	24.3	34.95	1.1748	5.0345	2	1.1263	3.7547	2	1022	5048
Q10570	Cleavage and polyadenylation specificity factor subunit 1 (Cleavage and polyadenylation specificity factor 160 kDa subunit) (CPSF 160 kDa subunit)	CPSF1	1	2	2.1	160.88	0.91691	15.991	4	1.127	8.8067	4	1586	108436
P02679	Fibrinogen gamma chain	FGG	5	17	51.9	51.511	0.62086	31.517	31	1.1271	26.887	31	514	11441
Q9NZ08	Endoplasmic reticulum aminopeptidase 1 (EC 3.4.11.-) (ARTS-1) (Adipocyte-derived leucine aminopeptidase) (A-LAP) (Aminopeptidase PILS) (Puromycin-insensitive leucyl-specific aminopeptidase) (PILS-AP) (Type 1 tumor necrosis factor receptor shedding aminopeptidase regulator)	ERAP1	1	3	4.1	107.23	0.74008	3.7675	4	1.1278	20.5	4	2901	21303
A0A2R8Y6J3	60S ribosomal protein L5 (Fragment)	RPL5	4	16	58.4	27.045	1.1395	47.13	71	1.1281	17.338	71	1110	32688
E9PHM2	Leucine--tRNA ligase (EC 6.1.1.4)	LARS2	2	6	9	96.93	1.0398	30.147	3	1.1296	81.9	3	1768	43726
P08758	Annexin A5 (Anchorin CII) (Annexin V) (Annexin-5) (Calphobindin I) (CBP-I) (Endonexin II) (Lipocortin V) (Placental anticoagulant protein 4) (PP4) (Placental anticoagulant protein I) (PAP-I) (Thromboplastin inhibitor) (Vascular anticoagulant-alpha) (VAC-alpha)	ANXA5	5	14	51.6	35.936	1.0685	37.335	84	1.1299	25.948	84	615	34365
A0A0C4DGG1	Protein kinase C and casein kinase substrate in neurons protein 3 (Fragment)	PACSIN3	7	3	10.6	46.494	0.87074	3.7067	2	1.13	17.383	2	3008	110479
Q70UQ0	Inhibitor of nuclear factor kappa-B kinase-interacting protein (I kappa-B kinase-interacting protein) (IKBKB-interacting protein) (IKK-interacting protein)	IKBIP	1	4	11.7	39.309	1.0083	4.5583	6	1.13	9.696	6	2031	57917
A0A087WY82	Junctional adhesion molecule 1 (Junctional adhesion molecule A)	F11R	2	2	8.2	30.197	0.99578	34.555	6	1.1306	19.786	6	3174	128437
O43242	26S proteasome non-ATPase regulatory subunit 3 (26S proteasome regulatory subunit RPN3) (26S proteasome regulatory subunit S3) (Proteasome subunit p58)	PSMD3	2	9	24.9	60.977	1.3906	23.324	23	1.1308	21.071	23	228	11435
Q96JB2	Conserved oligomeric Golgi complex subunit 3 (COG complex subunit 3) (Component of oligomeric Golgi complex 3) (Vesicle-docking protein SEC34 homolog) (p94)	COG3	1	4	7	94.095	0.96029	31.994	4	1.1321	12.844	3	2448	5641
Q9NZ45	CDGSH iron-sulfur domain-containing protein 1 (MitoNEET)	CISD1	1	3	38	12.199	1.3574	27.612	3	1.1326	20.184	3	2902	78652
P63244	Receptor of activated protein C kinase 1 (Cell proliferation-inducing gene 21 protein) (Guanine nucleotide-binding protein subunit beta-2-like 1) (Guanine nucleotide-binding protein subunit beta-like protein 12.3) (Human lung cancer oncogene 7 protein) (HLC-7) (Receptor for activated C kinase) (Small ribosomal subunit protein RACK1) [Cleaved into: Receptor of activated protein C kinase 1, N-termi…	RACK1	22	19	57.1	35.076	1.4029	24.606	128	1.1327	25.731	127	1433	30779
Q9NYY8	FAST kinase domain-containing protein 2, mitochondrial	FASTKD2	1	5	10.7	81.462	1.2297	14.644	5	1.133	35.095	5	2899	32459
Q9UL46	Proteasome activator complex subunit 2 (11S regulator complex subunit beta) (REG-beta) (Activator of multicatalytic protease subunit 2) (Proteasome activator 28 subunit beta) (PA28b) (PA28beta)	PSME2	6	6	30.1	27.401	1.4922	68.78	6	1.133	61.435	6	3014	16752
K7EQ77	Complex I-B14.7 (NADH dehydrogenase [ubiquinone] 1 alpha subcomplex subunit 11) (NADH-ubiquinone oxidoreductase subunit B14.7)	NDUFA11	5	2	28.3	12.671	1.1964	22.442	5	1.1334	31.21	5	2108	26963
O14561	Acyl carrier protein, mitochondrial (ACP) (CI-SDAP) (NADH-ubiquinone oxidoreductase 9.6 kDa subunit)	NDUFAB1	3	4	17.9	17.417	1.6925	22.001	13	1.1335	24.512	13	153	123571
P40763	Signal transducer and activator of transcription 3 (Acute-phase response factor)	STAT3	2	8	15.2	88.067	0.92125	25.992	16	1.134	17.735	16	1053	19909
P15880	40S ribosomal protein S2 (40S ribosomal protein S4) (Protein LLRep3) (Small ribosomal subunit protein uS5)	RPS2	7	11	35.5	31.324	1.0219	37.084	86	1.134	16.348	86	739	5793
Q14789	Golgin subfamily B member 1 (372 kDa Golgi complex-associated protein) (GCP372) (Giantin) (Macrogolgin)	GOLGB1	4	5	2.2	376.01	0.90264	73.459	3	1.1345	4.172	3	1748	19905
Q9Y512	Sorting and assembly machinery component 50 homolog (Transformation-related gene 3 protein) (TRG-3)	SAMM50	1	5	17.1	51.976	1.3412	28.775	9	1.1349	18.808	9	3150	70870
P51452	Dual specificity protein phosphatase 3 (EC 3.1.3.16) (EC 3.1.3.48) (Dual specificity protein phosphatase VHR) (Vaccinia H1-related phosphatase) (VHR)	DUSP3	3	4	26.5	20.478	0.98485	26.261	8	1.1359	22.314	8	1203	871
Q8NC60	Nitric oxide-associated protein 1	NOA1	1	1	2	78.457	0.81837	4.2483	2	1.1362	10.163	2	2199	76994
P07900	Heat shock protein HSP 90-alpha (Heat shock 86 kDa) (HSP 86) (HSP86) (Lipopolysaccharide-associated protein 2) (LAP-2) (LPS-associated protein 2) (Renal carcinoma antigen NY-REN-38)	HSP90AA1	5	36	46.6	84.659	1.0435	44.582	140	1.1371	27.601	140	594	5154
Q9BRR6	ADP-dependent glucokinase (ADP-GK) (ADPGK) (EC 2.7.1.147) (RbBP-35)	ADPGK	3	2	5.2	54.088	1.0977	12.361	2	1.1371	21.66	2	2572	198541
M0QY25	Prostate tumor-overexpressed gene 1 protein	PTOV1	7	3	14.6	43.263	0.89567	37.557	4	1.1375	24.519	4	2111	104006
O43837	Isocitrate dehydrogenase [NAD] subunit beta, mitochondrial (Isocitric dehydrogenase subunit beta) (NAD(+)-specific ICDH subunit beta)	IDH3B	4	5	18.4	42.183	1.2996	22.966	17	1.138	18.062	17	268	35688
R4GMS6	Sideroflexin-2	SFXN2	9	1	20.9	7.4573	0.57124	20.811	2	1.1384	108.62	2	2468	138566
P52564	Dual specificity mitogen-activated protein kinase kinase 6 (MAP kinase kinase 6) (MAPKK 6) (EC 2.7.12.2) (MAPK/ERK kinase 6) (MEK 6) (Stress-activated protein kinase kinase 3) (SAPK kinase 3) (SAPKK-3) (SAPKK3)	MAP2K6	1	1	4.8	37.492	0.81151	0.30835	2	1.1392	6.1328	2	1225	38988
Q15417	Calponin-3 (Calponin, acidic isoform)	CNN3	2	6	26.7	36.413	1.0256	18.379	10	1.1395	16.8	10	1807	9214
O15294	UDP-N-acetylglucosamine--peptide N-acetylglucosaminyltransferase 110 kDa subunit (EC 2.4.1.255) (O-GlcNAc transferase subunit p110) (O-linked N-acetylglucosamine transferase 110 kDa subunit) (OGT)	OGT	1	3	4.4	116.92	0.65362	13.347	5	1.1399	8.5032	5	206	11429
O60547	GDP-mannose 4,6 dehydratase (EC 4.2.1.47) (GDP-D-mannose dehydratase) (GMD)	GMDS	1	9	29.8	41.949	1.1564	14.139	38	1.1406	15.524	38	291	62833
O94874	E3 UFM1-protein ligase 1 (EC 2.3.2.-) (E3 UFM1-protein transferase 1) (Multiple alpha-helix protein located at ER) (Novel LZAP-binding protein) (Regulator of C53/LZAP and DDRGK1)	UFL1	1	6	10.6	89.594	1.2116	15.199	6	1.1416	19.265	6	402	4260
Q7Z2W4	Zinc finger CCCH-type antiviral protein 1 (ADP-ribosyltransferase diphtheria toxin-like 13) (ARTD13) (Inactive Poly [ADP-ribose] polymerase 13) (PARP13) (Zinc finger CCCH domain-containing protein 2) (Zinc finger antiviral protein) (ZAP)	ZC3HAV1	2	8	15.6	101.43	1.0199	11.494	5	1.1425	38.91	5	2054	5341
Q13247	Serine/arginine-rich splicing factor 6 (Pre-mRNA-splicing factor SRP55) (Splicing factor, arginine/serine-rich 6)	SRSF6	6	8	19.2	39.586	1.0476	25.788	13	1.1427	28.56	13	1633	13046
Q9UBB4	Ataxin-10 (Brain protein E46 homolog) (Spinocerebellar ataxia type 10 protein)	ATXN10	4	9	26.5	53.488	1.2133	22.921	15	1.1427	17.689	15	2937	5952
Q9UNH7	Sorting nexin-6 (TRAF4-associated factor 2) [Cleaved into: Sorting nexin-6, N-terminally processed]	SNX6	3	5	10.3	46.648	0.96598	25.799	4	1.1429	13.926	4	3035	38993
Q9UHD1	Cysteine and histidine-rich domain-containing protein 1 (CHORD domain-containing protein 1) (CHORD-containing protein 1) (CHP-1) (Protein morgana)	CHORDC1	7	7	28.3	37.489	1.1602	20.177	15	1.1431	18.496	15	2971	6494
Q9P2E9	Ribosome-binding protein 1 (180 kDa ribosome receptor homolog) (RRp) (ES/130-related protein) (Ribosome receptor protein)	RRBP1	11	40	35	152.45	1.043	28.818	164	1.1435	19.257	164	2932	1587
K7ERF1	Eukaryotic translation initiation factor 3 subunit K (eIF3k) (Eukaryotic translation initiation factor 3 subunit 12) (eIF-3 p25)	EIF3K	6	5	31.2	22.095	1.1512	23.559	10	1.1439	13.182	10	2944	15220
G3V2V8	Epididymal secretory protein E1 (NPC intracellular cholesterol transporter 2) (Fragment)	NPC2	7	4	40.2	13.078	1.0182	11.871	4	1.1443	11.157	4	1355	26507
P62913	60S ribosomal protein L11 (CLL-associated antigen KW-12) (Large ribosomal subunit protein uL5)	RPL11	2	5	28.1	20.252	1.0485	22.367	35	1.1444	16.525	35	1415	18979
C9IZ80	Basic leucine zipper and W2 domain-containing protein 1 (Fragment)	BZW1	3	2	6.5	33.454	1.0698	12.802	5	1.1453	11.393	5	2039	32834
P61247	40S ribosomal protein S3a (Small ribosomal subunit protein eS1) (v-fos transformation effector protein) (Fte-1)	RPS3A	12	17	59.8	29.945	1.1957	26.717	95	1.1459	29.505	95	1340	4184
P42285	Exosome RNA helicase MTR4 (EC 3.6.4.13) (ATP-dependent RNA helicase DOB1) (ATP-dependent RNA helicase SKIV2L2) (Superkiller viralicidic activity 2-like 2) (TRAMP-like complex helicase)	MTREX	2	8	10.9	117.8	0.93063	18.462	12	1.1461	12.798	12	1075	38783
E9PLD3	Uncharacterized protein	0	3	1	13.1	11.6	1.2064	10.906	5	1.1463	4.4268	5	102	223375
Q53S60	Bile salt export pump (Fragment)	ABCB11	5	2	5.5	49.464	1.8353	12.704	4	1.1465	20.615	4	432	91753
P62258	14-3-3 protein epsilon (14-3-3E)	YWHAE	6	21	71.4	29.174	1.1875	39.807	110	1.1466	20.056	110	1373	1129
P25786	Proteasome subunit alpha type-1 (30 kDa prosomal protein) (PROS-30) (Macropain subunit C2) (Multicatalytic endopeptidase complex subunit C2) (Proteasome component C2) (Proteasome nu chain)	PSMA1	4	8	30.8	29.555	1.0106	19.932	30	1.1468	21.631	30	871	51105
Q9Y5J7	Mitochondrial import inner membrane translocase subunit Tim9	TIMM9	5	2	29.2	10.378	1.1133	13.177	4	1.1477	25.677	4	3159	2436
Q96A33	Coiled-coil domain-containing protein 47 (Calumin)	CCDC47	2	5	14.9	55.873	1.1523	24.316	9	1.1477	28.822	9	2368	47519
M0R0Y2	Alpha-soluble NSF attachment protein	NAPA	8	3	18.4	29.163	0.99877	11.261	5	1.1484	16.803	5	1274	138245
Q00325	Phosphate carrier protein, mitochondrial (Phosphate transport protein) (PTP) (Solute carrier family 25 member 3)	SLC25A3	5	10	27.9	40.094	1.1557	26.96	50	1.1485	25.443	50	1497	62482
P18031	Tyrosine-protein phosphatase non-receptor type 1 (EC 3.1.3.48) (Protein-tyrosine phosphatase 1B) (PTP-1B)	PTPN1	2	6	20.9	49.966	1.0397	21.7	8	1.1486	16.324	8	773	48603
P62280	40S ribosomal protein S11 (Small ribosomal subunit protein uS17)	RPS11	4	11	55.1	18.431	1.2612	17.095	83	1.1496	17.571	83	1379	26921
P13639	Elongation factor 2 (EF-2)	EEF2	1	39	43.8	95.337	1.2215	26.347	241	1.1506	27.915	241	699	8311
Q96I51	RCC1-like G exchanging factor-like protein (RCC1-like) (Williams-Beuren syndrome chromosomal region 16 protein)	RCC1L	1	1	4.7	49.996	0.98818	13.575	2	1.1511	21.355	2	2439	221514
P11021	Endoplasmic reticulum chaperone BiP (EC 3.6.4.10) (78 kDa glucose-regulated protein) (GRP-78) (Binding-immunoglobulin protein) (BiP) (Heat shock protein 70 family protein 5) (HSP70 family protein 5) (Heat shock protein family A member 5) (Immunoglobulin heavy chain-binding protein)	HSPA5	1	41	53.5	72.332	0.94448	25.702	521	1.1512	23.706	520	662	12051
P35606	Coatomer subunit beta' (Beta'-coat protein) (Beta'-COP) (p102)	COPB2	7	19	25.1	102.49	1.2862	42.06	40	1.1514	26.123	40	1005	1050
O60341	Lysine-specific histone demethylase 1A (EC 1.14.99.66) (BRAF35-HDAC complex protein BHC110) (Flavin-containing amine oxidase domain-containing protein 2) ([histone H3]-dimethyl-L-lysine(4) FAD-dependent demethylase 1A)	KDM1A	3	5	11.2	92.902	0.68864	29.459	2	1.1515	30.193	2	283	28136
Q9ULV4	Coronin-1C (Coronin-3) (hCRNN4)	CORO1C	10	7	15.2	53.248	0.77378	47.75	6	1.1528	30.201	6	3021	27300
P15924	Desmoplakin (DP) (250/210 kDa paraneoplastic pemphigus antigen)	DSP	1	31	15.6	331.77	0.95843	25.68	63	1.1528	21.501	63	741	6217
Q9Y6M9	NADH dehydrogenase [ubiquinone] 1 beta subcomplex subunit 9 (Complex I-B22) (CI-B22) (LYR motif-containing protein 3) (NADH-ubiquinone oxidoreductase B22 subunit)	NDUFB9	5	4	28.5	21.831	0.91478	20.724	14	1.1533	21.005	14	3193	7242
P00491	Purine nucleoside phosphorylase (PNP) (EC 2.4.2.1) (Inosine phosphorylase) (Inosine-guanosine phosphorylase)	PNP	3	4	18	32.118	0.98216	14.35	6	1.1547	19.268	6	490	32434
P62750	60S ribosomal protein L23a (Large ribosomal subunit protein uL23)	RPL23A	6	8	36.5	17.695	1.4227	42.369	40	1.1548	50.918	40	1393	59265
P54727	UV excision repair protein RAD23 homolog B (HR23B) (hHR23B) (XP-C repair-complementing complex 58 kDa protein) (p58)	RAD23B	5	5	25.2	43.171	1.49	33.825	6	1.1552	14.678	6	1270	50555
K7ENH2	Proteasome activator complex subunit 3 (Fragment)	PSME3	10	5	35.8	20.593	1.007	21.691	35	1.1555	15.041	35	1342	99762
P40429	60S ribosomal protein L13a (23 kDa highly basic protein) (Large ribosomal subunit protein uL13)	RPL13A	6	9	38.9	23.577	1.0248	45.761	67	1.1555	25.56	67	1051	6747
P49406	39S ribosomal protein L19, mitochondrial (L19mt) (MRP-L19) (39S ribosomal protein L15, mitochondrial) (L15mt) (MRP-L15) (Mitochondrial large ribosomal subunit protein bL19m)	MRPL19	4	2	11	33.535	0.93356	3.5671	2	1.1561	1.2072	2	1152	29401
[truncated: 259 more rows]
