# Supplementary material for: Global Lysine Acetylome Analysis of LPS-Stimulated HepG2 Cells Identified Hyperacetylation of PKM2 as a Metabolic Regulator in Sepsis
Source: Int J Mol Sci. 2021 Aug 8;22(16):8529. doi: 10.3390/ijms22168529 (PMC8395202; doi:10.3390/ijms22168529)
Supplement: Supplementary file 1 [file ijms-22-08529-s001.zip › ijms-1283398 suppl/Table S2. Global proteome_clustering.xlsx]

## Sheet: CLUSTER
Table S2. Protein list in Cluster 1-5
T: Protein IDs	T: Majority protein IDs	Group
G5E9D5	tr|G5E9D5|G5E9D5_HUMAN;sp|Q9BQ52|RNZ2_HUMAN;tr|E7ES68|E7ES68_HUMAN;tr|V9GYS7|V9GYS7_HUMAN	1
A0A0A0MR02	tr|A0A0A0MR02|A0A0A0MR02_HUMAN;sp|P45880|VDAC2_HUMAN;tr|Q5JSD2|Q5JSD2_HUMAN;tr|Q5JSD1|Q5JSD1_HUMAN	1
O75131	sp|O75131|CPNE3_HUMAN;tr|H0YB26|H0YB26_HUMAN;tr|A0A087WYQ3|A0A087WYQ3_HUMAN	1
Q99959	sp|Q99959|PKP2_HUMAN	1
F8W1R7	tr|F8W1R7|F8W1R7_HUMAN;sp|P60660|MYL6_HUMAN;tr|G3V1V0|G3V1V0_HUMAN;tr|J3KND3|J3KND3_HUMAN;tr|G8JLA2|G8JLA2_HUMAN;tr|B7Z6Z4|B7Z6Z4_HUMAN;tr|G3V1Y7|G3V1Y7_HUMAN;tr|F8VPF3|F8VPF3_HUMAN;tr|F8VZU9|F8VZU9_HUMAN;tr|F8W180|F8W180_HUMAN	1
P18206	sp|P18206|VINC_HUMAN	1
Q15417	sp|Q15417|CNN3_HUMAN;tr|E9PDU6|E9PDU6_HUMAN	1
P12081	sp|P12081|SYHC_HUMAN;tr|B3KWE1|B3KWE1_HUMAN;tr|B4E1C5|B4E1C5_HUMAN;tr|B4DDD8|B4DDD8_HUMAN;tr|A0A2R8Y6I1|A0A2R8Y6I1_HUMAN;tr|A0A2R8Y3N3|A0A2R8Y3N3_HUMAN;sp|P49590|SYHM_HUMAN;tr|A0A2R8Y5P7|A0A2R8Y5P7_HUMAN	1
Q99567	sp|Q99567|NUP88_HUMAN;tr|J3KMX1|J3KMX1_HUMAN	1
Q15404	sp|Q15404|RSU1_HUMAN	1
Q02818	sp|Q02818|NUCB1_HUMAN;tr|C9JKZ2|C9JKZ2_HUMAN;tr|H7BZI1|H7BZI1_HUMAN	1
M0R0F0	tr|M0R0F0|M0R0F0_HUMAN;sp|P46782|RS5_HUMAN;tr|M0R0R2|M0R0R2_HUMAN;tr|M0QZN2|M0QZN2_HUMAN	1
E9PGZ1	tr|E9PGZ1|E9PGZ1_HUMAN;tr|E7EX44|E7EX44_HUMAN;tr|C9J813|C9J813_HUMAN	1
P13473	sp|P13473|LAMP2_HUMAN	1
F8W8D4	tr|F8W8D4|F8W8D4_HUMAN;sp|Q8TBC4|UBA3_HUMAN	1
O75083	sp|O75083|WDR1_HUMAN;tr|D6RD66|D6RD66_HUMAN	1
Q13509	sp|Q13509|TBB3_HUMAN;tr|A0A0B4J269|A0A0B4J269_HUMAN	1
E9PK01	tr|E9PK01|E9PK01_HUMAN;sp|P29692|EF1D_HUMAN;tr|A0A087X1X7|A0A087X1X7_HUMAN;tr|E9PRY8|E9PRY8_HUMAN;tr|E9PQ49|E9PQ49_HUMAN;tr|E9PI39|E9PI39_HUMAN;tr|E9PPR1|E9PPR1_HUMAN;tr|E9PL12|E9PL12_HUMAN;tr|E9PL71|E9PL71_HUMAN;tr|E9PQZ1|E9PQZ1_HUMAN;tr|E9PMW7|E9PMW7_HUMAN;tr|E9PIZ1|E9PIZ1_HUMAN;tr|H0YCK7|H0YCK7_HUMAN	1
Q13247	sp|Q13247|SRSF6_HUMAN	1
Q15067	sp|Q15067|ACOX1_HUMAN	1
Q15907	sp|Q15907|RB11B_HUMAN;tr|H3BMH2|H3BMH2_HUMAN;tr|H3BSC1|H3BSC1_HUMAN;sp|P62491|RB11A_HUMAN	1
H7C487	tr|H7C487|H7C487_HUMAN;sp|Q9BXB4|OSB11_HUMAN;sp|Q9BXB5|OSB10_HUMAN	1
P62913	sp|P62913|RL11_HUMAN;tr|Q5VVC8|Q5VVC8_HUMAN	1
O43707	sp|O43707|ACTN4_HUMAN;tr|F5GXS2|F5GXS2_HUMAN	1
Q9P2E9	sp|Q9P2E9|RRBP1_HUMAN;tr|A0A087WVV2|A0A087WVV2_HUMAN;tr|F8W7S5|F8W7S5_HUMAN	1
P07900	sp|P07900|HS90A_HUMAN	1
P41091	sp|P41091|IF2G_HUMAN;sp|Q2VIR3|IF2GL_HUMAN	1
Q9H4M9	sp|Q9H4M9|EHD1_HUMAN;tr|A0A024R571|A0A024R571_HUMAN;tr|C9J2Z4|C9J2Z4_HUMAN;tr|C9JC03|C9JC03_HUMAN	1
E9PHM2	tr|E9PHM2|E9PHM2_HUMAN;sp|Q15031|SYLM_HUMAN	1
Q8IYB3	sp|Q8IYB3|SRRM1_HUMAN;tr|A9Z1X7|A9Z1X7_HUMAN;tr|M0R088|M0R088_HUMAN;tr|E9PCT1|E9PCT1_HUMAN	1
O00767	sp|O00767|ACOD_HUMAN	1
Q15555	sp|Q15555|MARE2_HUMAN	1
P55072	sp|P55072|TERA_HUMAN	1
A0A024R4E5	tr|A0A024R4E5|A0A024R4E5_HUMAN;sp|Q00341|VIGLN_HUMAN;tr|H0Y394|H0Y394_HUMAN	1
A0A075B730	tr|A0A075B730|A0A075B730_HUMAN;sp|P58107|EPIPL_HUMAN	1
P18031	sp|P18031|PTN1_HUMAN;tr|B4DSN5|B4DSN5_HUMAN	1
J3KQ66	tr|J3KQ66|J3KQ66_HUMAN;sp|P78509|RELN_HUMAN	1
Q96C01	sp|Q96C01|F136A_HUMAN;tr|E7EQY1|E7EQY1_HUMAN	1
P62857	sp|P62857|RS28_HUMAN	1
Q9NQ88	sp|Q9NQ88|TIGAR_HUMAN;tr|A0A0U1RQD1|A0A0U1RQD1_HUMAN	1
U3KQ12	tr|U3KQ12|U3KQ12_HUMAN;tr|U3KPY7|U3KPY7_HUMAN;sp|O00422|SAP18_HUMAN;tr|H7BZW6|H7BZW6_HUMAN	1
A0A075B6E5	tr|A0A075B6E5|A0A075B6E5_HUMAN;sp|Q8N8S7|ENAH_HUMAN;tr|A0A0U1RRM6|A0A0U1RRM6_HUMAN	1
A0A0A0MT32	tr|A0A0A0MT32|A0A0A0MT32_HUMAN;sp|P38571|LICH_HUMAN	1
P26639	sp|P26639|SYTC_HUMAN	1
A0A2R8Y811	tr|A0A2R8Y811|A0A2R8Y811_HUMAN;sp|P62263|RS14_HUMAN;tr|E5RH77|E5RH77_HUMAN	1
H0YLF3	tr|H0YLF3|H0YLF3_HUMAN;tr|F5H6I0|F5H6I0_HUMAN;sp|P61769|B2MG_HUMAN	1
Q7L8L6	sp|Q7L8L6|FAKD5_HUMAN	1
Q9UHD8	sp|Q9UHD8|SEPT9_HUMAN	1
A0A3B3IRQ8	tr|A0A3B3IRQ8|A0A3B3IRQ8_HUMAN;tr|A0A3B3ITF6|A0A3B3ITF6_HUMAN;tr|A0A3B3IRI2|A0A3B3IRI2_HUMAN;sp|P17812|PYRG1_HUMAN;tr|A0A3B3ITB8|A0A3B3ITB8_HUMAN;tr|B4E1E0|B4E1E0_HUMAN	1
K7ENH2	tr|K7ENH2|K7ENH2_HUMAN;tr|K9J957|K9J957_HUMAN;sp|P61289|PSME3_HUMAN;tr|B3KQ25|B3KQ25_HUMAN;tr|K7ESG5|K7ESG5_HUMAN;tr|K7EMD0|K7EMD0_HUMAN;tr|K7EPX6|K7EPX6_HUMAN;tr|K7EKR3|K7EKR3_HUMAN	1
D6REP8	tr|D6REP8|D6REP8_HUMAN;tr|D6RE99|D6RE99_HUMAN;tr|D6RD60|D6RD60_HUMAN;sp|P49773|HINT1_HUMAN;tr|D6RC06|D6RC06_HUMAN	1
A0A087WTZ5	tr|A0A087WTZ5|A0A087WTZ5_HUMAN;tr|E9PJ81|E9PJ81_HUMAN;tr|E9PRQ7|E9PRQ7_HUMAN;sp|Q04323|UBXN1_HUMAN	1
Q9HCN8	sp|Q9HCN8|SDF2L_HUMAN	1
A0A087WY71	tr|A0A087WY71|A0A087WY71_HUMAN;sp|Q96CW1|AP2M1_HUMAN;tr|E9PFW3|E9PFW3_HUMAN	1
P50990	sp|P50990|TCPQ_HUMAN	1
Q99460	sp|Q99460|PSMD1_HUMAN;tr|A0A087WW66|A0A087WW66_HUMAN	1
A0A087WWU8	tr|A0A087WWU8|A0A087WWU8_HUMAN;tr|Q5HYB6|Q5HYB6_HUMAN;tr|Q5VU61|Q5VU61_HUMAN;tr|D6R904|D6R904_HUMAN;tr|J3KN67|J3KN67_HUMAN	1
P25786	sp|P25786|PSA1_HUMAN;tr|F5GX11|F5GX11_HUMAN;tr|B4DEV8|B4DEV8_HUMAN	1
Q01581	sp|Q01581|HMCS1_HUMAN	1
P15374	sp|P15374|UCHL3_HUMAN;tr|A0A087WTB8|A0A087WTB8_HUMAN;tr|Q5TBK7|Q5TBK7_HUMAN	1
P37268	sp|P37268|FDFT_HUMAN;tr|E9PNM1|E9PNM1_HUMAN;tr|A0A1W2PQ47|A0A1W2PQ47_HUMAN	1
Q70UQ0	sp|Q70UQ0|IKIP_HUMAN	1
Q15738	sp|Q15738|NSDHL_HUMAN;tr|C9JDR0|C9JDR0_HUMAN	1
B7Z2Y2	tr|B7Z2Y2|B7Z2Y2_HUMAN;sp|Q14746|COG2_HUMAN;tr|V9GY21|V9GY21_HUMAN	1
E9PLA9	tr|E9PLA9|E9PLA9_HUMAN;sp|Q14444|CAPR1_HUMAN;tr|G3V153|G3V153_HUMAN	1
P63261	sp|P63261|ACTG_HUMAN;tr|I3L3I0|I3L3I0_HUMAN;tr|I3L1U9|I3L1U9_HUMAN	1
Q7Z2W4	sp|Q7Z2W4|ZCCHV_HUMAN;tr|C9J6P4|C9J6P4_HUMAN	1
Q9H9Q2	sp|Q9H9Q2|CSN7B_HUMAN;tr|A0A087X1P5|A0A087X1P5_HUMAN;tr|J3KQ34|J3KQ34_HUMAN;tr|J3KQ41|J3KQ41_HUMAN;tr|J3QT95|J3QT95_HUMAN;tr|J3QT73|J3QT73_HUMAN	1
F8WJN3	tr|F8WJN3|F8WJN3_HUMAN;sp|Q16630|CPSF6_HUMAN	1
G3V2V8	tr|G3V2V8|G3V2V8_HUMAN;tr|J3KMY5|J3KMY5_HUMAN;sp|P61916|NPC2_HUMAN;tr|G3V3E8|G3V3E8_HUMAN;tr|E7EMS2|E7EMS2_HUMAN;tr|G3V3D1|G3V3D1_HUMAN;tr|H0YIZ1|H0YIZ1_HUMAN	1
P15880	sp|P15880|RS2_HUMAN;tr|H0YEN5|H0YEN5_HUMAN;tr|E9PQD7|E9PQD7_HUMAN;tr|I3L404|I3L404_HUMAN;tr|E9PM36|E9PM36_HUMAN;tr|E9PMM9|E9PMM9_HUMAN	1
P40429	sp|P40429|RL13A_HUMAN;tr|M0QYS1|M0QYS1_HUMAN;tr|Q8J015|Q8J015_HUMAN	1
Q13033	sp|Q13033|STRN3_HUMAN	1
Q9HCE6	sp|Q9HCE6|ARGAL_HUMAN;tr|Q5VXI4|Q5VXI4_HUMAN	1
H0YC42	tr|H0YC42|H0YC42_HUMAN	1
F8WDT8	tr|F8WDT8|F8WDT8_HUMAN;tr|G3V0G3|G3V0G3_HUMAN;tr|H7C3E9|H7C3E9_HUMAN;sp|Q9NY93|DDX56_HUMAN	1
A0A087WVM4	tr|A0A087WVM4|A0A087WVM4_HUMAN;sp|Q6UB35|C1TM_HUMAN;tr|B7ZM99|B7ZM99_HUMAN	1
P11021	sp|P11021|BIP_HUMAN	1
P08238	sp|P08238|HS90B_HUMAN	1
B4DY09	tr|B4DY09|B4DY09_HUMAN;sp|Q12905|ILF2_HUMAN	1
O95757	sp|O95757|HS74L_HUMAN;tr|E9PDE8|E9PDE8_HUMAN;tr|D6RJ96|D6RJ96_HUMAN	1
Q6YP21	sp|Q6YP21|KAT3_HUMAN;tr|A0A0A0MRN7|A0A0A0MRN7_HUMAN	1
Q9P015	sp|Q9P015|RM15_HUMAN;tr|E5RIZ4|E5RIZ4_HUMAN;tr|E5RHF4|E5RHF4_HUMAN	1
Q9C0C9	sp|Q9C0C9|UBE2O_HUMAN;tr|K7ES11|K7ES11_HUMAN	1
Q9BS26	sp|Q9BS26|ERP44_HUMAN	1
O14964	sp|O14964|HGS_HUMAN;tr|I3L165|I3L165_HUMAN;tr|I3L1P5|I3L1P5_HUMAN	1
K7ERI7	tr|K7ERI7|K7ERI7_HUMAN;sp|P35268|RL22_HUMAN;tr|K7EP65|K7EP65_HUMAN;tr|K7EKS7|K7EKS7_HUMAN;tr|K7ELC4|K7ELC4_HUMAN;tr|K7EMH1|K7EMH1_HUMAN;tr|K7EJT5|K7EJT5_HUMAN	1
P42224	sp|P42224|STAT1_HUMAN;tr|J3KPM9|J3KPM9_HUMAN	1
P42285	sp|P42285|MTREX_HUMAN	1
A0A0A0MRW6	tr|A0A0A0MRW6|A0A0A0MRW6_HUMAN;sp|Q9H6R4|NOL6_HUMAN	1
P14324	sp|P14324|FPPS_HUMAN;tr|A0A087X1D8|A0A087X1D8_HUMAN;tr|A0A087WVN4|A0A087WVN4_HUMAN;tr|A0A087WTP2|A0A087WTP2_HUMAN	1
Q15942	sp|Q15942|ZYX_HUMAN;tr|H0Y2Y8|H0Y2Y8_HUMAN;tr|C9IZ41|C9IZ41_HUMAN	1
Q07812	sp|Q07812|BAX_HUMAN;tr|K4JQN1|K4JQN1_HUMAN	1
Q8TCJ2	sp|Q8TCJ2|STT3B_HUMAN	1
P49406	sp|P49406|RM19_HUMAN;tr|S4R455|S4R455_HUMAN;tr|S4R3W9|S4R3W9_HUMAN;tr|A0A0A0MRF4|A0A0A0MRF4_HUMAN	1
P40938	sp|P40938|RFC3_HUMAN	1
Q9NQ29	sp|Q9NQ29|LUC7L_HUMAN;tr|F8WBC1|F8WBC1_HUMAN;tr|F2Z322|F2Z322_HUMAN	1
C9JAW5	tr|C9JAW5|C9JAW5_HUMAN;sp|Q9Y241|HIG1A_HUMAN;tr|C9JNU6|C9JNU6_HUMAN	1
P60059	sp|P60059|SC61G_HUMAN	1
P82932	sp|P82932|RT06_HUMAN	1
P12004	sp|P12004|PCNA_HUMAN	1
P09382	sp|P09382|LEG1_HUMAN	1
P20073	sp|P20073|ANXA7_HUMAN	1
Q969V3	sp|Q969V3|NCLN_HUMAN;tr|K7EMW4|K7EMW4_HUMAN	1
D6R918	tr|D6R918|D6R918_HUMAN;tr|D6RBC5|D6RBC5_HUMAN;tr|D6RDI5|D6RDI5_HUMAN;tr|D6RA54|D6RA54_HUMAN;tr|D6RC55|D6RC55_HUMAN;tr|D6RG39|D6RG39_HUMAN;tr|D6RIT9|D6RIT9_HUMAN;sp|Q9NX40|OCAD1_HUMAN	1
P57081	sp|P57081|WDR4_HUMAN	1
Q96I51	sp|Q96I51|RCC1L_HUMAN	1
P53396	sp|P53396|ACLY_HUMAN	1
P49748	sp|P49748|ACADV_HUMAN	1
A0A087WY82	tr|A0A087WY82|A0A087WY82_HUMAN;sp|Q9Y624|JAM1_HUMAN	1
Q13907	sp|Q13907|IDI1_HUMAN	1
P62269	sp|P62269|RS18_HUMAN	1
E7END7	tr|E7END7|E7END7_HUMAN;sp|P62820|RAB1A_HUMAN	1
H0YHA7	tr|H0YHA7|H0YHA7_HUMAN;sp|Q07020|RL18_HUMAN;tr|J3QQ67|J3QQ67_HUMAN;tr|G3V203|G3V203_HUMAN;tr|F8VUA6|F8VUA6_HUMAN;tr|F8VYV2|F8VYV2_HUMAN;tr|A0A075B7A0|A0A075B7A0_HUMAN	1
Q9NX20	sp|Q9NX20|RM16_HUMAN	1
P61019	sp|P61019|RAB2A_HUMAN;tr|E9PKL7|E9PKL7_HUMAN	1
P31153	sp|P31153|METK2_HUMAN	1
M0R0Y2	tr|M0R0Y2|M0R0Y2_HUMAN;tr|M0R2M1|M0R2M1_HUMAN;sp|P54920|SNAA_HUMAN	1
P63313	sp|P63313|TYB10_HUMAN	1
Q9BZE1	sp|Q9BZE1|RM37_HUMAN;tr|S4R369|S4R369_HUMAN;tr|H0Y4J2|H0Y4J2_HUMAN;tr|A6NHR2|A6NHR2_HUMAN	1
P15924	sp|P15924|DESP_HUMAN	1
Q15046	sp|Q15046|SYK_HUMAN	1
Q5T9A4	sp|Q5T9A4|ATD3B_HUMAN	1
P62879	sp|P62879|GBB2_HUMAN;tr|C9JIS1|C9JIS1_HUMAN;tr|C9JXA5|C9JXA5_HUMAN;tr|C9JZN1|C9JZN1_HUMAN;tr|E7EP32|E7EP32_HUMAN	1
Q8IWE2	sp|Q8IWE2|NXP20_HUMAN	1
Q96JB2	sp|Q96JB2|COG3_HUMAN	1
Q9H2W6	sp|Q9H2W6|RM46_HUMAN	1
E5RGS9	tr|E5RGS9|E5RGS9_HUMAN;sp|Q9NRG0|CHRC1_HUMAN	1
P26885	sp|P26885|FKBP2_HUMAN;tr|F5H0N4|F5H0N4_HUMAN	1
P28838	sp|P28838|AMPL_HUMAN;tr|H0Y9Q1|H0Y9Q1_HUMAN	1
B7Z9I1	tr|B7Z9I1|B7Z9I1_HUMAN;sp|P11310|ACADM_HUMAN;tr|Q5T4U5|Q5T4U5_HUMAN	1
Q14764	sp|Q14764|MVP_HUMAN	1
P50570	sp|P50570|DYN2_HUMAN;tr|A0A0D9SFB1|A0A0D9SFB1_HUMAN;tr|A0A0U1RQP1|A0A0U1RQP1_HUMAN;tr|A0A0D9SFE4|A0A0D9SFE4_HUMAN;sp|Q05193|DYN1_HUMAN	1
J3QQS1	tr|J3QQS1|J3QQS1_HUMAN;sp|Q9Y2R9|RT07_HUMAN;tr|J3QLS3|J3QLS3_HUMAN;tr|J3KSI8|J3KSI8_HUMAN;tr|J3QKW2|J3QKW2_HUMAN	1
Q9UNH7	sp|Q9UNH7|SNX6_HUMAN;tr|A0A0A0MRI2|A0A0A0MRI2_HUMAN	1
Q5JRX3	sp|Q5JRX3|PREP_HUMAN;tr|H0Y7L7|H0Y7L7_HUMAN;tr|A0A0A0MRX9|A0A0A0MRX9_HUMAN	1
F2Z307	tr|F2Z307|F2Z307_HUMAN;sp|O95670|VATG2_HUMAN;sp|O75348|VATG1_HUMAN	1
O15212	sp|O15212|PFD6_HUMAN;tr|A2AB88|A2AB88_HUMAN	1
Q60FE5	tr|Q60FE5|Q60FE5_HUMAN;sp|P21333|FLNA_HUMAN;tr|A0A087WWY3|A0A087WWY3_HUMAN	1
P46940	sp|P46940|IQGA1_HUMAN;tr|A0A0J9YXZ5|A0A0J9YXZ5_HUMAN;tr|H0YLE8|H0YLE8_HUMAN	1
Q8WUM4	sp|Q8WUM4|PDC6I_HUMAN	1
O43765	sp|O43765|SGTA_HUMAN;tr|K7EMD6|K7EMD6_HUMAN	1
P51452	sp|P51452|DUS3_HUMAN;tr|K7ES89|K7ES89_HUMAN	1
P00491	sp|P00491|PNPH_HUMAN;tr|G3V5M2|G3V5M2_HUMAN	1
Q16643	sp|Q16643|DREB_HUMAN;tr|D6RFI1|D6RFI1_HUMAN;tr|D6R9W4|D6R9W4_HUMAN	1
P17096	sp|P17096|HMGA1_HUMAN	1
P53602	sp|P53602|MVD1_HUMAN;tr|H3BP35|H3BP35_HUMAN	1
P33176	sp|P33176|KINH_HUMAN	1
P13797	sp|P13797|PLST_HUMAN;tr|A0A0A0MSQ0|A0A0A0MSQ0_HUMAN	1
Q8WVC2	tr|Q8WVC2|Q8WVC2_HUMAN;sp|P63220|RS21_HUMAN;tr|Q9BYK1|Q9BYK1_HUMAN	1
Q13618	sp|Q13618|CUL3_HUMAN;tr|A0A087WTG3|A0A087WTG3_HUMAN	1
P49326	sp|P49326|FMO5_HUMAN;tr|E9PJF3|E9PJF3_HUMAN	1
H7C5M9	tr|H7C5M9|H7C5M9_HUMAN;tr|C9JSA3|C9JSA3_HUMAN;tr|C9JND6|C9JND6_HUMAN;tr|C9J6F3|C9J6F3_HUMAN;tr|C9J5C3|C9J5C3_HUMAN;sp|Q9BUL8|PDC10_HUMAN;tr|C9J932|C9J932_HUMAN	1
H3BUR9	tr|H3BUR9|H3BUR9_HUMAN;sp|O14735|CDIPT_HUMAN;tr|B3KY94|B3KY94_HUMAN	1
Q9Y2A7	sp|Q9Y2A7|NCKP1_HUMAN	1
P11142	sp|P11142|HSP7C_HUMAN;tr|E9PKE3|E9PKE3_HUMAN;tr|E9PNE6|E9PNE6_HUMAN;tr|E9PN89|E9PN89_HUMAN	1
P18124	sp|P18124|RL7_HUMAN;tr|A8MUD9|A8MUD9_HUMAN	1
P11216	sp|P11216|PYGB_HUMAN	1
P25815	sp|P25815|S100P_HUMAN	1
P35244	sp|P35244|RFA3_HUMAN;tr|B5MC59|B5MC59_HUMAN	1
P43686	sp|P43686|PRS6B_HUMAN	1
Q9NP72	sp|Q9NP72|RAB18_HUMAN;tr|Q5W0J0|Q5W0J0_HUMAN;tr|A0A087X163|A0A087X163_HUMAN	1
P30050	sp|P30050|RL12_HUMAN	1
X1WI28	tr|X1WI28|X1WI28_HUMAN;sp|P27635|RL10_HUMAN;tr|A0A087WV22|A0A087WV22_HUMAN	1
C9JYN0	tr|C9JYN0|C9JYN0_HUMAN;sp|Q16563|SYPL1_HUMAN;tr|A0A0U1RQT9|A0A0U1RQT9_HUMAN;tr|H7C4J8|H7C4J8_HUMAN	1
C9JFU6	tr|C9JFU6|C9JFU6_HUMAN;tr|C9JCB7|C9JCB7_HUMAN;sp|Q8NBZ7|UXS1_HUMAN;tr|C9J3T9|C9J3T9_HUMAN;tr|C9JE50|C9JE50_HUMAN;tr|C9JW33|C9JW33_HUMAN	1
P78371	sp|P78371|TCPB_HUMAN;tr|F5GWF6|F5GWF6_HUMAN;tr|F8VQ14|F8VQ14_HUMAN	1
P16615	sp|P16615|AT2A2_HUMAN;tr|H7C5W9|H7C5W9_HUMAN	1
Q7Z5L9	sp|Q7Z5L9|I2BP2_HUMAN	1
P18077	sp|P18077|RL35A_HUMAN;tr|C9K025|C9K025_HUMAN;tr|F8WBS5|F8WBS5_HUMAN;tr|F8WB72|F8WB72_HUMAN	1
J3QR09	tr|J3QR09|J3QR09_HUMAN;tr|J3KTE4|J3KTE4_HUMAN;sp|P84098|RL19_HUMAN	1
B4DDF4	tr|B4DDF4|B4DDF4_HUMAN;sp|Q99439|CNN2_HUMAN;tr|B4DUT8|B4DUT8_HUMAN;tr|A0A087X271|A0A087X271_HUMAN;tr|A0A087X1X5|A0A087X1X5_HUMAN;tr|H3BVI6|H3BVI6_HUMAN	1
Q9Y5J7	sp|Q9Y5J7|TIM9_HUMAN;tr|G3V2F3|G3V2F3_HUMAN;tr|A0A1W2PRH9|A0A1W2PRH9_HUMAN;tr|A0A1W2PQS5|A0A1W2PQS5_HUMAN;tr|G3V502|G3V502_HUMAN	1
Q99471	sp|Q99471|PFD5_HUMAN;tr|H3BMQ1|H3BMQ1_HUMAN;tr|H3BPF6|H3BPF6_HUMAN	1
Q04917	sp|Q04917|1433F_HUMAN	1
O60749	sp|O60749|SNX2_HUMAN	1
P29966	sp|P29966|MARCS_HUMAN	1
P25398	sp|P25398|RS12_HUMAN	1
P36507	sp|P36507|MP2K2_HUMAN;tr|G5E9C7|G5E9C7_HUMAN	1
Q5T4S7	sp|Q5T4S7|UBR4_HUMAN;tr|A0A0A0MSW0|A0A0A0MSW0_HUMAN	1
P31689	sp|P31689|DNJA1_HUMAN	1
P46063	sp|P46063|RECQ1_HUMAN	1
Q8IXB1	sp|Q8IXB1|DJC10_HUMAN	1
Q9BW27	sp|Q9BW27|NUP85_HUMAN;tr|J3QLV0|J3QLV0_HUMAN;tr|J3QLD4|J3QLD4_HUMAN;tr|J3QL54|J3QL54_HUMAN;tr|J3KT10|J3KT10_HUMAN	1
Q13200	sp|Q13200|PSMD2_HUMAN	1
Q9NUU7	sp|Q9NUU7|DD19A_HUMAN;tr|I3L0H8|I3L0H8_HUMAN;tr|H3BTB3|H3BTB3_HUMAN	1
O00231	sp|O00231|PSD11_HUMAN	1
P52907	sp|P52907|CAZA1_HUMAN	1
P50502	sp|P50502|F10A1_HUMAN;tr|Q3KNR6|Q3KNR6_HUMAN;sp|Q8NFI4|F10A5_HUMAN;tr|H7C3I1|H7C3I1_HUMAN;tr|F6VDH7|F6VDH7_HUMAN;sp|Q8IZP2|ST134_HUMAN	1
P55145	sp|P55145|MANF_HUMAN;tr|A8K878|A8K878_HUMAN	1
P30085	sp|P30085|KCY_HUMAN;tr|Q5T0D2|Q5T0D2_HUMAN	1
O43264	sp|O43264|ZW10_HUMAN	1
Q9BVK6	sp|Q9BVK6|TMED9_HUMAN	1
P61457	sp|P61457|PHS_HUMAN	1
Q9BRR6	sp|Q9BRR6|ADPGK_HUMAN;tr|H3BU35|H3BU35_HUMAN;tr|H3BRS6|H3BRS6_HUMAN	1
P63167	sp|P63167|DYL1_HUMAN;tr|F8VXI7|F8VXI7_HUMAN;tr|F8VXL2|F8VXL2_HUMAN;tr|F8VRV5|F8VRV5_HUMAN	1
Q92598	sp|Q92598|HS105_HUMAN;tr|A0A0A0MSM0|A0A0A0MSM0_HUMAN	1
C9J9K3	tr|C9J9K3|C9J9K3_HUMAN;sp|P08865|RSSA_HUMAN;tr|A0A0C4DG17|A0A0C4DG17_HUMAN;tr|F8WD59|F8WD59_HUMAN	1
Q8WUH6	sp|Q8WUH6|TM263_HUMAN	1
P01011	sp|P01011|AACT_HUMAN;tr|G3V3A0|G3V3A0_HUMAN	1
P05023	sp|P05023|AT1A1_HUMAN	1
Q8N5K1	sp|Q8N5K1|CISD2_HUMAN;tr|A0A2R8Y540|A0A2R8Y540_HUMAN;tr|I3L1N9|I3L1N9_HUMAN	1
F5H8H2	tr|F5H8H2|F5H8H2_HUMAN;sp|Q03426|KIME_HUMAN;tr|A0A1B0GWC2|A0A1B0GWC2_HUMAN	1
P05783	sp|P05783|K1C18_HUMAN;tr|F8VZY9|F8VZY9_HUMAN	1
P46779	sp|P46779|RL28_HUMAN;tr|H0YKD8|H0YKD8_HUMAN;tr|H0YMF4|H0YMF4_HUMAN;tr|H0YLP6|H0YLP6_HUMAN	1
P01019	sp|P01019|ANGT_HUMAN	1
Q96I63	tr|Q96I63|Q96I63_HUMAN;sp|Q96TA2|YMEL1_HUMAN	1
Q9Y399	sp|Q9Y399|RT02_HUMAN;tr|Q5T8A0|Q5T8A0_HUMAN	1
Q9BPX5	sp|Q9BPX5|ARP5L_HUMAN	1
P40227	sp|P40227|TCPZ_HUMAN	1
Q02878	sp|Q02878|RL6_HUMAN	1
E9PKG1	tr|E9PKG1|E9PKG1_HUMAN;sp|Q99873|ANM1_HUMAN	1
P52292	sp|P52292|IMA1_HUMAN	1
K7EK07	tr|K7EK07|K7EK07_HUMAN;sp|Q71DI3|H32_HUMAN;sp|Q16695|H31T_HUMAN;sp|P84243|H33_HUMAN;sp|P68431|H31_HUMAN;tr|K7EMV3|K7EMV3_HUMAN;tr|B4DEB1|B4DEB1_HUMAN;tr|K7ES00|K7ES00_HUMAN;sp|Q6NXT2|H3C_HUMAN;tr|K7EP01|K7EP01_HUMAN	1
C9JEY1	tr|C9JEY1|C9JEY1_HUMAN;tr|C9K057|C9K057_HUMAN;sp|O15143|ARC1B_HUMAN	1
Q9NZL9	sp|Q9NZL9|MAT2B_HUMAN;tr|E5RJR3|E5RJR3_HUMAN;tr|H7C0X7|H7C0X7_HUMAN	1
P05386	sp|P05386|RLA1_HUMAN	1
P0DMV9	sp|P0DMV9|HS71B_HUMAN;sp|P0DMV8|HS71A_HUMAN;tr|A0A0G2JIW1|A0A0G2JIW1_HUMAN;tr|V9GZ37|V9GZ37_HUMAN	1
J3KTA4	tr|J3KTA4|J3KTA4_HUMAN;sp|P17844|DDX5_HUMAN	1
P62701	sp|P62701|RS4X_HUMAN	1
P06748	sp|P06748|NPM_HUMAN	1
Q32Q12	tr|Q32Q12|Q32Q12_HUMAN;sp|P22392|NDKB_HUMAN;tr|J3KPD9|J3KPD9_HUMAN;tr|E7ERL0|E7ERL0_HUMAN;sp|O60361|NDK8_HUMAN	1
A0A2R8Y623	tr|A0A2R8Y623|A0A2R8Y623_HUMAN;sp|P62081|RS7_HUMAN;tr|B5MCP9|B5MCP9_HUMAN	1
O60547	sp|O60547|GMDS_HUMAN	1
Q9UHD1	sp|Q9UHD1|CHRD1_HUMAN;tr|E9PIZ4|E9PIZ4_HUMAN;tr|E9PSD5|E9PSD5_HUMAN;tr|E9PPQ5|E9PPQ5_HUMAN	1
I3L3P7	tr|I3L3P7|I3L3P7_HUMAN;sp|P62244|RS15A_HUMAN	1
P08183	sp|P08183|MDR1_HUMAN	1
Q9Y3U8	sp|Q9Y3U8|RL36_HUMAN;tr|J3QSB5|J3QSB5_HUMAN	1
Q13185	sp|Q13185|CBX3_HUMAN	1
Q5T196	tr|Q5T196|Q5T196_HUMAN;sp|Q8NFF5|FAD1_HUMAN;tr|Q5T191|Q5T191_HUMAN	1
R4GMR5	tr|R4GMR5|R4GMR5_HUMAN;sp|P48556|PSMD8_HUMAN;tr|K7EJC1|K7EJC1_HUMAN;tr|K7EJR3|K7EJR3_HUMAN	1
A0A2R8Y6J3	tr|A0A2R8Y6J3|A0A2R8Y6J3_HUMAN;sp|P46777|RL5_HUMAN;tr|Q5T7N0|Q5T7N0_HUMAN	1
M0QZS6	tr|M0QZS6|M0QZS6_HUMAN;sp|Q9UBE0|SAE1_HUMAN;tr|B3KNJ4|B3KNJ4_HUMAN;tr|M0QX65|M0QX65_HUMAN	1
P78540	sp|P78540|ARGI2_HUMAN	1
Q96SU4	sp|Q96SU4|OSBL9_HUMAN	1
Q9UBM7	sp|Q9UBM7|DHCR7_HUMAN;tr|E9PM00|E9PM00_HUMAN	1
P04844	sp|P04844|RPN2_HUMAN	1
O00299	sp|O00299|CLIC1_HUMAN	1
Q00325	sp|Q00325|MPCP_HUMAN;tr|F8VVM2|F8VVM2_HUMAN	1
P62873	sp|P62873|GBB1_HUMAN;tr|F6UT28|F6UT28_HUMAN;tr|B1AKQ8|B1AKQ8_HUMAN;tr|F6X3N5|F6X3N5_HUMAN	1
P27105	sp|P27105|STOM_HUMAN;tr|F8VSL7|F8VSL7_HUMAN	1
K7ERF1	tr|K7ERF1|K7ERF1_HUMAN;sp|Q9UBQ5|EIF3K_HUMAN;tr|K7ES31|K7ES31_HUMAN;tr|A0A087WVB9|A0A087WVB9_HUMAN	1
E7ETK0	tr|E7ETK0|E7ETK0_HUMAN;tr|A0A2R8Y849|A0A2R8Y849_HUMAN;tr|A0A087WUS0|A0A087WUS0_HUMAN;sp|P62847|RS24_HUMAN;tr|A0A2R8YD14|A0A2R8YD14_HUMAN	1
Q96A33	sp|Q96A33|CCD47_HUMAN	1
P67936	sp|P67936|TPM4_HUMAN;tr|A0A2R8YGX3|A0A2R8YGX3_HUMAN;tr|A0A2R8Y5V9|A0A2R8Y5V9_HUMAN;tr|A0A2R8YE05|A0A2R8YE05_HUMAN;tr|K7ENT6|K7ENT6_HUMAN	1
P42858	sp|P42858|HD_HUMAN	1
Q5JR08	tr|Q5JR08|Q5JR08_HUMAN;sp|P08134|RHOC_HUMAN;tr|E9PQH6|E9PQH6_HUMAN;tr|Q5JR07|Q5JR07_HUMAN;tr|C9JNR4|C9JNR4_HUMAN;tr|C9JX21|C9JX21_HUMAN;tr|Q5JR05|Q5JR05_HUMAN	1
Q9Y6A4	sp|Q9Y6A4|CFA20_HUMAN	1
G5E9W8	tr|G5E9W8|G5E9W8_HUMAN;tr|C9JQ42|C9JQ42_HUMAN;sp|P46976|GLYG_HUMAN	1
H7C3P4	tr|H7C3P4|H7C3P4_HUMAN;sp|P15586|GNS_HUMAN;tr|F6S8M0|F6S8M0_HUMAN;tr|F5H4C6|F5H4C6_HUMAN	1
A0A087X054	tr|A0A087X054|A0A087X054_HUMAN;sp|Q9Y4L1|HYOU1_HUMAN;tr|E9PJ21|E9PJ21_HUMAN;tr|A0A087WWI4|A0A087WWI4_HUMAN;tr|K7EQK2|K7EQK2_HUMAN	1
P35579	sp|P35579|MYH9_HUMAN	1
Q15691	sp|Q15691|MARE1_HUMAN	1
P26373	sp|P26373|RL13_HUMAN;tr|J3QSB4|J3QSB4_HUMAN	1
P07108	sp|P07108|ACBP_HUMAN;tr|B8ZWD1|B8ZWD1_HUMAN;tr|A0A0A0MTI5|A0A0A0MTI5_HUMAN	1
A0A0C4DGS0	tr|A0A0C4DGS0|A0A0C4DGS0_HUMAN;sp|P56556|NDUA6_HUMAN;tr|A0A2Y9D025|A0A2Y9D025_HUMAN;tr|R4GN43|R4GN43_HUMAN	1
H0YDT8	tr|H0YDT8|H0YDT8_HUMAN;sp|Q9NPA0|EMC7_HUMAN;tr|H0YDX2|H0YDX2_HUMAN	1
A0A0U1RQF0	tr|A0A0U1RQF0|A0A0U1RQF0_HUMAN;sp|P49327|FAS_HUMAN	1
Q99832	sp|Q99832|TCPH_HUMAN	1
P17066	sp|P17066|HSP76_HUMAN	1
P07148	sp|P07148|FABPL_HUMAN;tr|A8MW49|A8MW49_HUMAN	1
Q9NR19	sp|Q9NR19|ACSA_HUMAN	1
Q9H6F5	sp|Q9H6F5|CCD86_HUMAN;tr|H0YG79|H0YG79_HUMAN	1
Q9UKK3	sp|Q9UKK3|PARP4_HUMAN	1
C9IZ80	tr|C9IZ80|C9IZ80_HUMAN;sp|Q7L1Q6|BZW1_HUMAN;tr|C9JFN4|C9JFN4_HUMAN	1
P17987	sp|P17987|TCPA_HUMAN;tr|E7ERF2|E7ERF2_HUMAN;tr|E7EQR6|E7EQR6_HUMAN;tr|F5H282|F5H282_HUMAN	1
P08758	sp|P08758|ANXA5_HUMAN;tr|D6RBL5|D6RBL5_HUMAN;tr|D6RBE9|D6RBE9_HUMAN;tr|E9PHT9|E9PHT9_HUMAN	1
Q9HB71	sp|Q9HB71|CYBP_HUMAN	1
A3KMH1	sp|A3KMH1|VWA8_HUMAN	1
Q8TC12	sp|Q8TC12|RDH11_HUMAN;tr|G3V2G6|G3V2G6_HUMAN;tr|G3V234|G3V234_HUMAN;tr|H0YIZ8|H0YIZ8_HUMAN	1
P28070	sp|P28070|PSB4_HUMAN	1
Q99519	sp|Q99519|NEUR1_HUMAN;tr|E9PIF4|E9PIF4_HUMAN	1
A0A096LNZ9	tr|A0A096LNZ9|A0A096LNZ9_HUMAN;tr|A0A096LPJ4|A0A096LPJ4_HUMAN;sp|P05161|ISG15_HUMAN	1
Q9Y2L6	sp|Q9Y2L6|FRM4B_HUMAN;tr|C9JA15|C9JA15_HUMAN;tr|C9JAW0|C9JAW0_HUMAN;tr|C9J6Q2|C9J6Q2_HUMAN;tr|H7C550|H7C550_HUMAN;tr|E9PGA7|E9PGA7_HUMAN	1
Q5VTE0	sp|Q5VTE0|EF1A3_HUMAN;sp|P68104|EF1A1_HUMAN;tr|A0A087WVQ9|A0A087WVQ9_HUMAN;tr|A0A087WV01|A0A087WV01_HUMAN	1
Q9BSJ8	sp|Q9BSJ8|ESYT1_HUMAN	1
F6RFD5	tr|F6RFD5|F6RFD5_HUMAN;sp|P60981|DEST_HUMAN	1
B7Z7F3	tr|B7Z7F3|B7Z7F3_HUMAN;sp|Q9H6Z4|RANB3_HUMAN	1
P19105	sp|P19105|ML12A_HUMAN;sp|O14950|ML12B_HUMAN;tr|J3QRS3|J3QRS3_HUMAN;sp|P24844|MYL9_HUMAN	1
P49721	sp|P49721|PSB2_HUMAN;tr|A0A087WVV1|A0A087WVV1_HUMAN	1
P12814	sp|P12814|ACTN1_HUMAN;tr|H9KV75|H9KV75_HUMAN	1
Q99536	sp|Q99536|VAT1_HUMAN	1
P55884	sp|P55884|EIF3B_HUMAN	1
Q53GQ0	sp|Q53GQ0|DHB12_HUMAN;tr|A0A1B0GV93|A0A1B0GV93_HUMAN	1
A0A2R8Y7Y3	tr|A0A2R8Y7Y3|A0A2R8Y7Y3_HUMAN;tr|Q4VB86|Q4VB86_HUMAN;tr|A0A2R8YD30|A0A2R8YD30_HUMAN;sp|P11171|41_HUMAN;tr|A0A3B3ITP0|A0A3B3ITP0_HUMAN;tr|A0A2U3TZH6|A0A2U3TZH6_HUMAN	1
A0A0A6YYB9	tr|A0A0A6YYB9|A0A0A6YYB9_HUMAN;tr|E5RIS5|E5RIS5_HUMAN;tr|I3L376|I3L376_HUMAN;tr|E5RGC5|E5RGC5_HUMAN;tr|J3KS67|J3KS67_HUMAN;tr|C9JYS5|C9JYS5_HUMAN;sp|Q9NYZ1|TV23B_HUMAN;sp|Q96ET8|TV23C_HUMAN	1
Q13243	sp|Q13243|SRSF5_HUMAN	1
P08708	sp|P08708|RS17_HUMAN;tr|H3BNC9|H3BNC9_HUMAN;tr|H0YN88|H0YN88_HUMAN;tr|A0A075B716|A0A075B716_HUMAN	1
Q02543	sp|Q02543|RL18A_HUMAN;tr|M0R1A7|M0R1A7_HUMAN;tr|M0R117|M0R117_HUMAN;tr|M0R0P7|M0R0P7_HUMAN;tr|M0R3D6|M0R3D6_HUMAN	1
O14672	sp|O14672|ADA10_HUMAN	1
H0Y6Y8	tr|H0Y6Y8|H0Y6Y8_HUMAN;tr|B1AL05|B1AL05_HUMAN;sp|Q8N983|RM43_HUMAN;tr|H0YBU8|H0YBU8_HUMAN	1
P04066	sp|P04066|FUCO_HUMAN	1
Q8NDI1	sp|Q8NDI1|EHBP1_HUMAN	1
J3QT28	tr|J3QT28|J3QT28_HUMAN;sp|O43684|BUB3_HUMAN;tr|J3QSX4|J3QSX4_HUMAN	2
Q9UBS4	sp|Q9UBS4|DJB11_HUMAN	2
P49247	sp|P49247|RPIA_HUMAN	2
B9A018	tr|B9A018|B9A018_HUMAN;sp|Q53GS9|SNUT2_HUMAN;tr|A0A087X1B2|A0A087X1B2_HUMAN	2
O75874	sp|O75874|IDHC_HUMAN	2
P62826	sp|P62826|RAN_HUMAN;tr|B5MDF5|B5MDF5_HUMAN;tr|J3KQE5|J3KQE5_HUMAN;tr|F5H018|F5H018_HUMAN;tr|B4DV51|B4DV51_HUMAN	2
P23378	sp|P23378|GCSP_HUMAN	2
E9PL57	tr|E9PL57|E9PL57_HUMAN;tr|F8VSA6|F8VSA6_HUMAN;tr|E9PS38|E9PS38_HUMAN;sp|Q15843|NEDD8_HUMAN;tr|S4R3E9|S4R3E9_HUMAN;sp|Q86V88|MGDP1_HUMAN	2
E9PGM4	tr|E9PGM4|E9PGM4_HUMAN;sp|Q04446|GLGB_HUMAN	2
P00505	sp|P00505|AATM_HUMAN	2
P10620	sp|P10620|MGST1_HUMAN;tr|F5H7F6|F5H7F6_HUMAN;tr|F5H6X2|F5H6X2_HUMAN	2
P00167	sp|P00167|CYB5_HUMAN	2
A0A2U3TZY2	tr|A0A2U3TZY2|A0A2U3TZY2_HUMAN;sp|Q9H078|CLPB_HUMAN;tr|H0YGM0|H0YGM0_HUMAN;tr|A0A2R8Y602|A0A2R8Y602_HUMAN	2
P01116	sp|P01116|RASK_HUMAN;sp|P01111|RASN_HUMAN;tr|G3V4K2|G3V4K2_HUMAN;tr|G3V5T7|G3V5T7_HUMAN;sp|P01112|RASH_HUMAN	2
H7C0D5	tr|H7C0D5|H7C0D5_HUMAN;sp|Q9BSR8|YIPF4_HUMAN	2
Q13823	sp|Q13823|NOG2_HUMAN	2
P10599	sp|P10599|THIO_HUMAN	2
Q9P287	sp|Q9P287|BCCIP_HUMAN	2
F5H1S8	tr|F5H1S8|F5H1S8_HUMAN;sp|Q14165|MLEC_HUMAN;tr|H0YG07|H0YG07_HUMAN;tr|F5GX14|F5GX14_HUMAN	2
Q16718	sp|Q16718|NDUA5_HUMAN;tr|F8WAS3|F8WAS3_HUMAN;tr|A0A087X1G1|A0A087X1G1_HUMAN;tr|H7BYD0|H7BYD0_HUMAN	2
Q96H79	sp|Q96H79|ZCCHL_HUMAN	2
P13284	sp|P13284|GILT_HUMAN	2
Q8WTT2	sp|Q8WTT2|NOC3L_HUMAN	2
P26599	sp|P26599|PTBP1_HUMAN;tr|A0A0U1RRM4|A0A0U1RRM4_HUMAN;tr|A6NLN1|A6NLN1_HUMAN	2
I3L0N3	tr|I3L0N3|I3L0N3_HUMAN;sp|P46459|NSF_HUMAN	2
P53618	sp|P53618|COPB_HUMAN	2
P16930	sp|P16930|FAAA_HUMAN	2
A0A0B4J1Z1	tr|A0A0B4J1Z1|A0A0B4J1Z1_HUMAN;tr|C9JAB2|C9JAB2_HUMAN;sp|Q16629|SRSF7_HUMAN	2
Q9NUQ9	sp|Q9NUQ9|FA49B_HUMAN;tr|A0A1W2PRQ0|A0A1W2PRQ0_HUMAN	2
P68402	sp|P68402|PA1B2_HUMAN	2
P56385	sp|P56385|ATP5I_HUMAN	2
A0A087WXC5	tr|A0A087WXC5|A0A087WXC5_HUMAN;sp|O95299|NDUAA_HUMAN;tr|E7ESZ7|E7ESZ7_HUMAN	2
P00352	sp|P00352|AL1A1_HUMAN	2
Q13268	sp|Q13268|DHRS2_HUMAN;tr|C9JZP6|C9JZP6_HUMAN;tr|H0YJG9|H0YJG9_HUMAN	2
Q7L014	sp|Q7L014|DDX46_HUMAN;tr|A0A0C4DG89|A0A0C4DG89_HUMAN;tr|D6RJA6|D6RJA6_HUMAN	2
O94826	sp|O94826|TOM70_HUMAN	2
P30046	sp|P30046|DOPD_HUMAN;tr|J3KQ18|J3KQ18_HUMAN;sp|A6NHG4|DDTL_HUMAN;tr|B5MC82|B5MC82_HUMAN	2
P04080	sp|P04080|CYTB_HUMAN;tr|A0A1W2PS52|A0A1W2PS52_HUMAN	2
P51857	sp|P51857|AK1D1_HUMAN	2
P36578	sp|P36578|RL4_HUMAN;tr|H3BM89|H3BM89_HUMAN;tr|H3BU31|H3BU31_HUMAN	2
P56192	sp|P56192|SYMC_HUMAN	2
Q09028	sp|Q09028|RBBP4_HUMAN;tr|H0YF10|H0YF10_HUMAN;tr|H0YCT5|H0YCT5_HUMAN;tr|H0YDK2|H0YDK2_HUMAN	2
P04899	sp|P04899|GNAI2_HUMAN	2
A0A3B3ITL5	tr|A0A3B3ITL5|A0A3B3ITL5_HUMAN;tr|A0A3B3IT59|A0A3B3IT59_HUMAN;sp|Q8N5Y2|MS3L1_HUMAN;tr|F8WC61|F8WC61_HUMAN;tr|A0A3F2YNX2|A0A3F2YNX2_HUMAN;tr|A0A3B3ITF3|A0A3B3ITF3_HUMAN;sp|P0C860|MS3L2_HUMAN	2
O00483	sp|O00483|NDUA4_HUMAN	2
A0A2R8Y425	tr|A0A2R8Y425|A0A2R8Y425_HUMAN;tr|A0A2R8Y5J0|A0A2R8Y5J0_HUMAN;tr|A0A2R8YFK9|A0A2R8YFK9_HUMAN;tr|A0A2U3TZM0|A0A2U3TZM0_HUMAN;tr|A0A2R8YFD8|A0A2R8YFD8_HUMAN;tr|F5GWX5|F5GWX5_HUMAN;sp|Q14839|CHD4_HUMAN;tr|A0A2R8Y212|A0A2R8Y212_HUMAN;tr|A0A2R8Y521|A0A2R8Y521_HUMAN;tr|A0A0C4DGG9|A0A0C4DGG9_HUMAN;tr|A0A2R8YDW2|A0A2R8YDW2_HUMAN;tr|A0A2R8YD40|A0A2R8YD40_HUMAN;tr|A0A2R8YDJ9|A0A2R8YDJ9_HUMAN;tr|A0A2R8Y4X2|…	2
Q8TB37	sp|Q8TB37|NUBPL_HUMAN	2
O95394	sp|O95394|AGM1_HUMAN;tr|A0A087WT27|A0A087WT27_HUMAN;tr|J3KN95|J3KN95_HUMAN;tr|H0Y8I3|H0Y8I3_HUMAN;tr|H0Y987|H0Y987_HUMAN	2
Q9NR30	sp|Q9NR30|DDX21_HUMAN	2
Q6P996	sp|Q6P996|PDXD1_HUMAN;tr|H3BND4|H3BND4_HUMAN	2
P25205	sp|P25205|MCM3_HUMAN;tr|J3KQ69|J3KQ69_HUMAN	2
C9IZY8	tr|C9IZY8|C9IZY8_HUMAN;sp|Q96PY5|FMNL2_HUMAN;tr|F8W1F5|F8W1F5_HUMAN;sp|Q8IVF7|FMNL3_HUMAN	2
P62633	sp|P62633|CNBP_HUMAN	2
A0A1X7SBZ2	tr|A0A1X7SBZ2|A0A1X7SBZ2_HUMAN;sp|Q92841|DDX17_HUMAN;tr|A0A1W2PQ51|A0A1W2PQ51_HUMAN	2
Q16706	sp|Q16706|MA2A1_HUMAN	2
Q96QD8	sp|Q96QD8|S38A2_HUMAN;tr|F8VUY8|F8VUY8_HUMAN	2
E9PG35	tr|E9PG35|E9PG35_HUMAN;tr|E9PHF7|E9PHF7_HUMAN;sp|Q96RQ3|MCCA_HUMAN;tr|G5E9X5|G5E9X5_HUMAN;tr|F5GYT8|F5GYT8_HUMAN	2
Q96I59	sp|Q96I59|SYNM_HUMAN;tr|H0YEL9|H0YEL9_HUMAN;tr|E9PRK2|E9PRK2_HUMAN	2
P53634	sp|P53634|CATC_HUMAN;tr|H0YCY8|H0YCY8_HUMAN	2
O43583	sp|O43583|DENR_HUMAN;tr|F8VVL1|F8VVL1_HUMAN	2
A0A096LPD9	tr|A0A096LPD9|A0A096LPD9_HUMAN;tr|E7EWK1|E7EWK1_HUMAN;tr|A0A182DWF2|A0A182DWF2_HUMAN;tr|D3YTF8|D3YTF8_HUMAN;tr|A0A182DWF3|A0A182DWF3_HUMAN;sp|Q9NNW7|TRXR2_HUMAN;tr|E9PLT3|E9PLT3_HUMAN;tr|E9PKI4|E9PKI4_HUMAN;tr|A0A096LPK7|A0A096LPK7_HUMAN	2
F8VZJ2	tr|F8VZJ2|F8VZJ2_HUMAN;tr|F8W0W4|F8W0W4_HUMAN;tr|H0YHX9|H0YHX9_HUMAN;sp|Q13765|NACA_HUMAN;sp|E9PAV3|NACAM_HUMAN;tr|F8W1N5|F8W1N5_HUMAN;tr|F8VNW4|F8VNW4_HUMAN	2
P80404	sp|P80404|GABT_HUMAN;tr|H3BRN4|H3BRN4_HUMAN;tr|H3BNQ7|H3BNQ7_HUMAN	2
P16989	sp|P16989|YBOX3_HUMAN	2
Q99961	sp|Q99961|SH3G1_HUMAN;tr|M0QYE0|M0QYE0_HUMAN;tr|M0R0I3|M0R0I3_HUMAN	2
Q13057	sp|Q13057|COASY_HUMAN	2
P38606	sp|P38606|VATA_HUMAN	2
P02749	sp|P02749|APOH_HUMAN;tr|J3QRN2|J3QRN2_HUMAN	2
O15145	sp|O15145|ARPC3_HUMAN;tr|C9JZD1|C9JZD1_HUMAN;tr|F8VR50|F8VR50_HUMAN	2
P62861	sp|P62861|RS30_HUMAN;tr|E9PR30|E9PR30_HUMAN	2
Q8NI22	sp|Q8NI22|MCFD2_HUMAN	2
K7ELQ9	tr|K7ELQ9|K7ELQ9_HUMAN;sp|Q6UW68|TM205_HUMAN;tr|K7ER05|K7ER05_HUMAN;tr|K7EJQ9|K7EJQ9_HUMAN;tr|K7EM09|K7EM09_HUMAN;tr|K7EPR0|K7EPR0_HUMAN	2
O60701	sp|O60701|UGDH_HUMAN	2
E9PBP6	tr|E9PBP6|E9PBP6_HUMAN;sp|P55157|MTP_HUMAN	2
Q8NC51	sp|Q8NC51|PAIRB_HUMAN	2
P62277	sp|P62277|RS13_HUMAN;tr|J3KMX5|J3KMX5_HUMAN	2
B1AK87	tr|B1AK87|B1AK87_HUMAN;tr|B1AK88|B1AK88_HUMAN	2
Q6UXN9	sp|Q6UXN9|WDR82_HUMAN	2
A0A0B4J2A0	tr|A0A0B4J2A0|A0A0B4J2A0_HUMAN;sp|Q9UHJ6|SHPK_HUMAN	2
A0A087WZK9	tr|A0A087WZK9|A0A087WZK9_HUMAN;sp|O15372|EIF3H_HUMAN;tr|B3KS98|B3KS98_HUMAN	2
Q9BY32	sp|Q9BY32|ITPA_HUMAN	2
O95747	sp|O95747|OXSR1_HUMAN;tr|C9JIG9|C9JIG9_HUMAN	2
H0YMC9	tr|H0YMC9|H0YMC9_HUMAN;tr|H0YLM6|H0YLM6_HUMAN;sp|Q9P253|VPS18_HUMAN	2
J3QLI9	tr|J3QLI9|J3QLI9_HUMAN;sp|P62314|SMD1_HUMAN	2
Q14697	sp|Q14697|GANAB_HUMAN;tr|F5H6X6|F5H6X6_HUMAN;tr|E9PKU7|E9PKU7_HUMAN	2
P27824	sp|P27824|CALX_HUMAN;tr|H0Y9Q7|H0Y9Q7_HUMAN;tr|D6RGY2|D6RGY2_HUMAN	2
Q99613	sp|Q99613|EIF3C_HUMAN;sp|B5ME19|EIFCL_HUMAN	2
P38159	sp|P38159|RBMX_HUMAN;tr|H0Y6E7|H0Y6E7_HUMAN;tr|H3BT71|H3BT71_HUMAN;tr|H3BR27|H3BR27_HUMAN;sp|Q96E39|RMXL1_HUMAN	2
Q6P1L8	sp|Q6P1L8|RM14_HUMAN	2
O43670	sp|O43670|ZN207_HUMAN;tr|J3QRS9|J3QRS9_HUMAN;tr|X6R4W8|X6R4W8_HUMAN;tr|J3KS31|J3KS31_HUMAN	2
A0A0C4DGA2	tr|A0A0C4DGA2|A0A0C4DGA2_HUMAN;sp|O75521|ECI2_HUMAN;tr|F1LLU7|F1LLU7_HUMAN;tr|F8WAW4|F8WAW4_HUMAN;tr|C9JB63|C9JB63_HUMAN	2
P62805	sp|P62805|H4_HUMAN	2
E9PSI1	tr|E9PSI1|E9PSI1_HUMAN;tr|E9PMQ9|E9PMQ9_HUMAN;sp|O15321|TM9S1_HUMAN	2
P53582	sp|P53582|MAP11_HUMAN;tr|H0Y955|H0Y955_HUMAN	2
G3V279	tr|G3V279|G3V279_HUMAN;sp|P84090|ERH_HUMAN	2
Q8N183	sp|Q8N183|NDUF2_HUMAN	2
C9J0Q4	tr|C9J0Q4|C9J0Q4_HUMAN;tr|F8WE49|F8WE49_HUMAN;sp|Q9NS91|RAD18_HUMAN;tr|F8WFA6|F8WFA6_HUMAN	2
H3BNW0	tr|H3BNW0|H3BNW0_HUMAN;sp|Q9NXG2|THUM1_HUMAN	2
P11166	sp|P11166|GTR1_HUMAN	2
A0A2U3TZN1	tr|A0A2U3TZN1|A0A2U3TZN1_HUMAN;tr|A0A087WWU9|A0A087WWU9_HUMAN;sp|P09132|SRP19_HUMAN;tr|D6RBG4|D6RBG4_HUMAN;tr|A0A2R8Y4M3|A0A2R8Y4M3_HUMAN;tr|A0A087WYR0|A0A087WYR0_HUMAN	2
P35270	sp|P35270|SPRE_HUMAN	2
Q5UIP0	sp|Q5UIP0|RIF1_HUMAN;tr|H7C2B5|H7C2B5_HUMAN;tr|H7BZN3|H7BZN3_HUMAN	2
E7EX73	tr|E7EX73|E7EX73_HUMAN;tr|E9PGM1|E9PGM1_HUMAN;tr|E7EUU4|E7EUU4_HUMAN;sp|Q04637|IF4G1_HUMAN;tr|C9JF13|C9JF13_HUMAN;tr|C9J6B6|C9J6B6_HUMAN;tr|C9K073|C9K073_HUMAN	2
Q8WVM8	sp|Q8WVM8|SCFD1_HUMAN	2
P21796	sp|P21796|VDAC1_HUMAN;tr|C9JI87|C9JI87_HUMAN	2
P23141	sp|P23141|EST1_HUMAN	2
Q86VP6	sp|Q86VP6|CAND1_HUMAN;tr|A0A0C4DGH5|A0A0C4DGH5_HUMAN	2
Q9Y617	sp|Q9Y617|SERC_HUMAN	2
P30086	sp|P30086|PEBP1_HUMAN	2
P49755	sp|P49755|TMEDA_HUMAN;tr|G3V2K7|G3V2K7_HUMAN	2
P67775	sp|P67775|PP2AA_HUMAN;sp|P62714|PP2AB_HUMAN;tr|H0YBN9|H0YBN9_HUMAN	2
H0YAE9	tr|H0YAE9|H0YAE9_HUMAN;tr|D6REQ6|D6REQ6_HUMAN;tr|D6RHI9|D6RHI9_HUMAN;sp|O00584|RNT2_HUMAN;tr|A0A087WZM2|A0A087WZM2_HUMAN	2
B8ZZU8	tr|B8ZZU8|B8ZZU8_HUMAN;sp|Q15370|ELOB_HUMAN;tr|I3L0M9|I3L0M9_HUMAN	2
E9PLK3	tr|E9PLK3|E9PLK3_HUMAN;sp|P55786|PSA_HUMAN	2
Q2NL82	sp|Q2NL82|TSR1_HUMAN	2
Q9NYF8	sp|Q9NYF8|BCLF1_HUMAN;tr|E9PJA7|E9PJA7_HUMAN;tr|A0A1W2PQ43|A0A1W2PQ43_HUMAN;tr|E9PK09|E9PK09_HUMAN;tr|E9PQN2|E9PQN2_HUMAN;tr|E9PKI6|E9PKI6_HUMAN;tr|E9PK91|E9PK91_HUMAN	2
P61353	sp|P61353|RL27_HUMAN;tr|K7ELC7|K7ELC7_HUMAN	2
Q16401	sp|Q16401|PSMD5_HUMAN	2
J3QQZ9	tr|J3QQZ9|J3QQZ9_HUMAN;sp|Q9NVS9|PNPO_HUMAN	2
P13995	sp|P13995|MTDC_HUMAN	2
Q9Y4W2	sp|Q9Y4W2|LAS1L_HUMAN	2
D6RH17	tr|D6RH17|D6RH17_HUMAN;tr|Q8IUN7|Q8IUN7_HUMAN;sp|P28332|ADH6_HUMAN	2
P06744	sp|P06744|G6PI_HUMAN;tr|A0A0A0MTS2|A0A0A0MTS2_HUMAN;tr|A0A2U3TZU2|A0A2U3TZU2_HUMAN;tr|K7EQ48|K7EQ48_HUMAN;tr|A0A0J9YXP8|A0A0J9YXP8_HUMAN;tr|A0A0J9YX90|A0A0J9YX90_HUMAN;tr|A0A0J9YYH3|A0A0J9YYH3_HUMAN;tr|A0A2R8Y6C7|A0A2R8Y6C7_HUMAN	2
Q9Y678	sp|Q9Y678|COPG1_HUMAN	2
Q9HAV7	sp|Q9HAV7|GRPE1_HUMAN	2
Q9Y2U8	sp|Q9Y2U8|MAN1_HUMAN	2
K7ER90	tr|K7ER90|K7ER90_HUMAN;tr|K7EL20|K7EL20_HUMAN;sp|O75821|EIF3G_HUMAN	2
P12277	sp|P12277|KCRB_HUMAN;tr|G3V4N7|G3V4N7_HUMAN	2
Q99575	sp|Q99575|POP1_HUMAN	2
P46783	sp|P46783|RS10_HUMAN;sp|Q9NQ39|RS10L_HUMAN;tr|A0A2R8Y6L3|A0A2R8Y6L3_HUMAN;tr|F6U211|F6U211_HUMAN;tr|A0A2R8Y7H1|A0A2R8Y7H1_HUMAN;tr|S4R435|S4R435_HUMAN;tr|A0A2R8YFH6|A0A2R8YFH6_HUMAN	2
P46926	sp|P46926|GNPI1_HUMAN;tr|D6RAY7|D6RAY7_HUMAN;tr|D6R9P4|D6R9P4_HUMAN;tr|D6R917|D6R917_HUMAN;tr|D6RB13|D6RB13_HUMAN;tr|D6RFF8|D6RFF8_HUMAN	2
Q13347	sp|Q13347|EIF3I_HUMAN	2
Q9BYD1	sp|Q9BYD1|RM13_HUMAN;tr|E5RFI2|E5RFI2_HUMAN;tr|E5RJI7|E5RJI7_HUMAN	2
A0A0A0MS45	tr|A0A0A0MS45|A0A0A0MS45_HUMAN;sp|Q9H9E3|COG4_HUMAN;tr|J3KNI1|J3KNI1_HUMAN	2
Q86VW0	sp|Q86VW0|SESD1_HUMAN;tr|F8WFB2|F8WFB2_HUMAN;tr|C9J4X8|C9J4X8_HUMAN;tr|C9JHW6|C9JHW6_HUMAN	2
E7EWC2	tr|E7EWC2|E7EWC2_HUMAN;tr|F5H7S7|F5H7S7_HUMAN;sp|Q13576|IQGA2_HUMAN;tr|D6R939|D6R939_HUMAN	2
H0YGW7	tr|H0YGW7|H0YGW7_HUMAN;sp|Q8NE71|ABCF1_HUMAN	2
Q8NEZ5	sp|Q8NEZ5|FBX22_HUMAN;tr|H3BTH6|H3BTH6_HUMAN	2
P42785	sp|P42785|PCP_HUMAN;tr|E9PNF7|E9PNF7_HUMAN	2
Q9Y320	sp|Q9Y320|TMX2_HUMAN;tr|E9PSF0|E9PSF0_HUMAN;tr|E9PRL5|E9PRL5_HUMAN;tr|H3BSU7|H3BSU7_HUMAN;tr|E9PLR1|E9PLR1_HUMAN;tr|G3V155|G3V155_HUMAN	2
Q04828	sp|Q04828|AK1C1_HUMAN;tr|H0Y804|H0Y804_HUMAN	2
Q99829	sp|Q99829|CPNE1_HUMAN;tr|B0QZ18|B0QZ18_HUMAN;tr|A6PVH9|A6PVH9_HUMAN;tr|F2Z2V0|F2Z2V0_HUMAN;tr|E7ENH5|E7ENH5_HUMAN;tr|Q5JX55|Q5JX55_HUMAN;tr|Q5JX56|Q5JX56_HUMAN;tr|Q5JX58|Q5JX58_HUMAN;tr|Q5JX59|Q5JX59_HUMAN;tr|Q5JX60|Q5JX60_HUMAN;tr|Q5JX44|Q5JX44_HUMAN	2
A0A087X0M4	tr|A0A087X0M4|A0A087X0M4_HUMAN;tr|A0A087WWF4|A0A087WWF4_HUMAN;sp|Q9BWU0|NADAP_HUMAN	2
Q96HE7	sp|Q96HE7|ERO1A_HUMAN;tr|G3V3E6|G3V3E6_HUMAN;tr|G3V5B3|G3V5B3_HUMAN	2
Q15393	sp|Q15393|SF3B3_HUMAN	2
P17174	sp|P17174|AATC_HUMAN	2
F5GY37	tr|F5GY37|F5GY37_HUMAN;tr|J3KPX7|J3KPX7_HUMAN;sp|Q99623|PHB2_HUMAN;tr|F5GWA7|F5GWA7_HUMAN;tr|F5H3X6|F5H3X6_HUMAN	2
B4DLR8	tr|B4DLR8|B4DLR8_HUMAN;sp|P15559|NQO1_HUMAN;tr|H3BNV2|H3BNV2_HUMAN;tr|H3BRK3|H3BRK3_HUMAN	2
P15531	sp|P15531|NDKA_HUMAN	2
Q9Y696	sp|Q9Y696|CLIC4_HUMAN	2
Q9H307	sp|Q9H307|PININ_HUMAN	2
P50213	sp|P50213|IDH3A_HUMAN;tr|H0YL72|H0YL72_HUMAN;tr|H0YLI6|H0YLI6_HUMAN;tr|H0YKD0|H0YKD0_HUMAN;tr|H0YMU3|H0YMU3_HUMAN	2
P34932	sp|P34932|HSP74_HUMAN;tr|A0A087WYC1|A0A087WYC1_HUMAN;tr|A0A087WTS8|A0A087WTS8_HUMAN	2
P36957	sp|P36957|ODO2_HUMAN;tr|Q86SW4|Q86SW4_HUMAN	2
P78344	sp|P78344|IF4G2_HUMAN;tr|D3DQV9|D3DQV9_HUMAN;tr|H0Y3P2|H0Y3P2_HUMAN;tr|H0YCH5|H0YCH5_HUMAN	2
P20020	sp|P20020|AT2B1_HUMAN;tr|E7ERY9|E7ERY9_HUMAN;sp|P23634|AT2B4_HUMAN	2
P21912	sp|P21912|SDHB_HUMAN;tr|A0A087WXX8|A0A087WXX8_HUMAN;tr|A0A087WWT1|A0A087WWT1_HUMAN	2
Q92526	sp|Q92526|TCPW_HUMAN	2
P02795	sp|P02795|MT2_HUMAN;tr|H3BSP9|H3BSP9_HUMAN	2
A0A087X0D5	tr|A0A087X0D5|A0A087X0D5_HUMAN;sp|P09668|CATH_HUMAN;tr|E9PKT6|E9PKT6_HUMAN	2
E9PQM0	tr|E9PQM0|E9PQM0_HUMAN;sp|Q8WUK0|PTPM1_HUMAN	2
P34897	sp|P34897|GLYM_HUMAN;tr|H0YIZ0|H0YIZ0_HUMAN;tr|G3V2Y4|G3V2Y4_HUMAN	2
Q9UKM9	sp|Q9UKM9|RALY_HUMAN;tr|Q5QPL9|Q5QPL9_HUMAN;tr|Q5QPM1|Q5QPM1_HUMAN;tr|Q5QPM0|Q5QPM0_HUMAN	2
Q5T7C4	tr|Q5T7C4|Q5T7C4_HUMAN;sp|P09429|HMGB1_HUMAN;sp|B2RPK0|HGB1A_HUMAN	2
P21281	sp|P21281|VATB2_HUMAN;tr|H0YC04|H0YC04_HUMAN	2
B4DJV2	tr|B4DJV2|B4DJV2_HUMAN;sp|O75390|CISY_HUMAN;tr|A0A0C4DGI3|A0A0C4DGI3_HUMAN;tr|H0YIC4|H0YIC4_HUMAN	2
Q07021	sp|Q07021|C1QBP_HUMAN;tr|I3L3Q7|I3L3Q7_HUMAN;tr|I3L3B0|I3L3B0_HUMAN	2
P62995	sp|P62995|TRA2B_HUMAN;tr|H7C2L4|H7C2L4_HUMAN;tr|H7BXF3|H7BXF3_HUMAN	2
Q86W42	sp|Q86W42|THOC6_HUMAN	2
Q9H8H0	sp|Q9H8H0|NOL11_HUMAN;tr|J3QR28|J3QR28_HUMAN;tr|J3QLQ6|J3QLQ6_HUMAN	2
P36542	sp|P36542|ATPG_HUMAN	2
P02649	sp|P02649|APOE_HUMAN;tr|H0Y7L5|H0Y7L5_HUMAN	2
O14776	sp|O14776|TCRG1_HUMAN;tr|G3V220|G3V220_HUMAN	2
O15427	sp|O15427|MOT4_HUMAN	2
Q92820	sp|Q92820|GGH_HUMAN	2
Q9H832	sp|Q9H832|UBE2Z_HUMAN;tr|I3L4C5|I3L4C5_HUMAN;tr|H0Y9X8|H0Y9X8_HUMAN	2
I3L3N5	tr|I3L3N5|I3L3N5_HUMAN;sp|P43034|LIS1_HUMAN	2
P06730	sp|P06730|IF4E_HUMAN;tr|D6RBW1|D6RBW1_HUMAN	2
P53007	sp|P53007|TXTP_HUMAN;tr|B4DP62|B4DP62_HUMAN	2
C9JZI1	tr|C9JZI1|C9JZI1_HUMAN;sp|P35249|RFC4_HUMAN;tr|C9JTT7|C9JTT7_HUMAN;tr|C9J8M3|C9J8M3_HUMAN	2
O75940	sp|O75940|SPF30_HUMAN	2
P07686	sp|P07686|HEXB_HUMAN;tr|Q5URX0|Q5URX0_HUMAN	2
K7EM73	tr|K7EM73|K7EM73_HUMAN;sp|P04632|CPNS1_HUMAN;tr|K7ELJ7|K7ELJ7_HUMAN;tr|A0A0C4DGQ5|A0A0C4DGQ5_HUMAN;tr|K7ES78|K7ES78_HUMAN;tr|K7EMQ1|K7EMQ1_HUMAN;tr|K7EIV0|K7EIV0_HUMAN;tr|A0A075B7C0|A0A075B7C0_HUMAN;tr|K7EKD8|K7EKD8_HUMAN	2
E9PPH5	tr|E9PPH5|E9PPH5_HUMAN;sp|Q9BTT0|AN32E_HUMAN	2
I3L3B4	tr|I3L3B4|I3L3B4_HUMAN;tr|F8W9H0|F8W9H0_HUMAN;sp|Q9BQB6|VKOR1_HUMAN;tr|E9PLN8|E9PLN8_HUMAN	2
P30049	sp|P30049|ATPD_HUMAN	2
O43809	sp|O43809|CPSF5_HUMAN;tr|H3BND3|H3BND3_HUMAN	2
I3L0Q0	tr|I3L0Q0|I3L0Q0_HUMAN;tr|I3L2Q4|I3L2Q4_HUMAN;sp|P62253|UB2G1_HUMAN	2
Q9Y6D5	sp|Q9Y6D5|BIG2_HUMAN	2
Q07955	sp|Q07955|SRSF1_HUMAN;tr|J3KTL2|J3KTL2_HUMAN;tr|J3KSR8|J3KSR8_HUMAN	2
E9PF19	tr|E9PF19|E9PF19_HUMAN;sp|Q9Y4P3|TBL2_HUMAN;tr|Q96E41|Q96E41_HUMAN	2
Q2Q1W2	sp|Q2Q1W2|LIN41_HUMAN	2
B8ZZA8	tr|B8ZZA8|B8ZZA8_HUMAN;tr|B8ZZC5|B8ZZC5_HUMAN	2
Q0VDF9	sp|Q0VDF9|HSP7E_HUMAN	2
V9GYD0	tr|V9GYD0|V9GYD0_HUMAN;sp|P36404|ARL2_HUMAN	2
C9JK83	tr|C9JK83|C9JK83_HUMAN;sp|O95630|STABP_HUMAN	2
G5E9S8	tr|G5E9S8|G5E9S8_HUMAN;tr|G3V2E7|G3V2E7_HUMAN;sp|Q07866|KLC1_HUMAN;tr|F8W6L3|F8W6L3_HUMAN;tr|G3V3H3|G3V3H3_HUMAN;tr|G3V5R9|G3V5R9_HUMAN;tr|E7EVH7|E7EVH7_HUMAN;tr|H0YGB8|H0YGB8_HUMAN;tr|H0YJU9|H0YJU9_HUMAN;tr|H0YJL0|H0YJL0_HUMAN;tr|H0YJT3|H0YJT3_HUMAN;tr|H0YG16|H0YG16_HUMAN	2
Q14683	sp|Q14683|SMC1A_HUMAN;tr|G8JLG1|G8JLG1_HUMAN	2
Q9HDC9	sp|Q9HDC9|APMAP_HUMAN;tr|H0Y512|H0Y512_HUMAN	2
P31939	sp|P31939|PUR9_HUMAN	2
P52209	sp|P52209|6PGD_HUMAN;tr|K7EM49|K7EM49_HUMAN;tr|K7EMN2|K7EMN2_HUMAN;tr|K7EPF6|K7EPF6_HUMAN	2
P11766	sp|P11766|ADHX_HUMAN;tr|H0YAG8|H0YAG8_HUMAN	2
O14744	sp|O14744|ANM5_HUMAN	2
Q06520	sp|Q06520|ST2A1_HUMAN	2
P60602	sp|P60602|ROMO1_HUMAN	2
B1ALA9	tr|B1ALA9|B1ALA9_HUMAN;sp|P60891|PRPS1_HUMAN;tr|A0A2R8Y7H4|A0A2R8Y7H4_HUMAN;tr|B1ALA7|B1ALA7_HUMAN;tr|A0A0B4J207|A0A0B4J207_HUMAN;sp|P21108|PRPS3_HUMAN	2
A0A3B3ITX7	tr|A0A3B3ITX7|A0A3B3ITX7_HUMAN;tr|E9PG39|E9PG39_HUMAN;tr|A0A3B3ISZ0|A0A3B3ISZ0_HUMAN;tr|E9PC15|E9PC15_HUMAN;tr|A0A3B3ITD0|A0A3B3ITD0_HUMAN;sp|Q53H12|AGK_HUMAN;tr|A0A3B3IUC9|A0A3B3IUC9_HUMAN;tr|A0A3B3ITV0|A0A3B3ITV0_HUMAN;tr|A0A3B3ISY9|A0A3B3ISY9_HUMAN	2
E7ETU5	tr|E7ETU5|E7ETU5_HUMAN;tr|F6Y5H0|F6Y5H0_HUMAN;sp|P29558|RBMS1_HUMAN;tr|E7EPF2|E7EPF2_HUMAN;tr|C9J9B2|C9J9B2_HUMAN;tr|C9JIJ9|C9JIJ9_HUMAN;sp|Q6XE24|RBMS3_HUMAN;tr|A0A1B0GUW5|A0A1B0GUW5_HUMAN	2
K7EIN2	tr|K7EIN2|K7EIN2_HUMAN;sp|Q9BRJ7|TIRR_HUMAN	2
Q9BRP1	sp|Q9BRP1|PDD2L_HUMAN	2
P00338	sp|P00338|LDHA_HUMAN;tr|F5GYU2|F5GYU2_HUMAN;tr|F5GXY2|F5GXY2_HUMAN	2
D6R938	tr|D6R938|D6R938_HUMAN;sp|Q13557|KCC2D_HUMAN;tr|E9PBG7|E9PBG7_HUMAN;tr|E9PF82|E9PF82_HUMAN;tr|H0Y9C2|H0Y9C2_HUMAN	2
P10768	sp|P10768|ESTD_HUMAN;tr|H7BZT7|H7BZT7_HUMAN;tr|X6RA14|X6RA14_HUMAN;tr|U3KQT1|U3KQT1_HUMAN	2
Q8N392	sp|Q8N392|RHG18_HUMAN	2
O00330	sp|O00330|ODPX_HUMAN;tr|H0YD97|H0YD97_HUMAN	2
P51003	sp|P51003|PAPOA_HUMAN;tr|G3XAH6|G3XAH6_HUMAN	2
H0YNM1	tr|H0YNM1|H0YNM1_HUMAN;sp|P30047|GFRP_HUMAN	2
Q12792	sp|Q12792|TWF1_HUMAN;tr|F8VS81|F8VS81_HUMAN	2
P26196	sp|P26196|DDX6_HUMAN	2
F5H1Z6	tr|F5H1Z6|F5H1Z6_HUMAN;tr|F5H8H3|F5H8H3_HUMAN;sp|Q9Y365|STA10_HUMAN;tr|F5GY11|F5GY11_HUMAN;tr|H0YGN8|H0YGN8_HUMAN;tr|H0YH17|H0YH17_HUMAN;tr|H0YFF3|H0YFF3_HUMAN;tr|F5H8G1|F5H8G1_HUMAN	2
Q8NBF2	sp|Q8NBF2|NHLC2_HUMAN	2
H3BQQ9	tr|H3BQQ9|H3BQQ9_HUMAN;sp|P63279|UBC9_HUMAN;tr|B0QYN7|B0QYN7_HUMAN;tr|H3BPC4|H3BPC4_HUMAN	2
Q9NX14	sp|Q9NX14|NDUBB_HUMAN	2
Q86VM6	tr|Q86VM6|Q86VM6_HUMAN;tr|C9JP00|C9JP00_HUMAN;sp|Q9NR56|MBNL1_HUMAN;tr|A0A0A0MQX8|A0A0A0MQX8_HUMAN;tr|C9JCX1|C9JCX1_HUMAN;tr|H7C4Y1|H7C4Y1_HUMAN;tr|O95205|O95205_HUMAN;tr|H7C4T5|H7C4T5_HUMAN	2
Q7L5D6	sp|Q7L5D6|GET4_HUMAN;tr|C9JPA8|C9JPA8_HUMAN;tr|C9JHN8|C9JHN8_HUMAN	2
Q08209	sp|Q08209|PP2BA_HUMAN;tr|E9PPC8|E9PPC8_HUMAN;tr|E9PK68|E9PK68_HUMAN;tr|E7ETC2|E7ETC2_HUMAN	2
O00748	sp|O00748|EST2_HUMAN	2
P41250	sp|P41250|GARS_HUMAN	2
Q13492	sp|Q13492|PICAL_HUMAN	2
Q86UE4	sp|Q86UE4|LYRIC_HUMAN;tr|E5RJU9|E5RJU9_HUMAN	2
P08319	sp|P08319|ADH4_HUMAN;tr|A0A0D9SFB5|A0A0D9SFB5_HUMAN;tr|D6R9K8|D6R9K8_HUMAN;tr|H0Y9N0|H0Y9N0_HUMAN;tr|D6RIB1|D6RIB1_HUMAN	2
A0A1B0GTB8	tr|A0A1B0GTB8|A0A1B0GTB8_HUMAN;tr|A0A1B0GWC0|A0A1B0GWC0_HUMAN;sp|P23786|CPT2_HUMAN;tr|A0A1B0GVF3|A0A1B0GVF3_HUMAN;tr|A0A1B0GV75|A0A1B0GV75_HUMAN	2
E9PP21	tr|E9PP21|E9PP21_HUMAN;sp|P21291|CSRP1_HUMAN;tr|E9PND2|E9PND2_HUMAN;tr|E9PS42|E9PS42_HUMAN	2
D6RIZ4	tr|D6RIZ4|D6RIZ4_HUMAN;tr|D6RA47|D6RA47_HUMAN;sp|Q14728|MFS10_HUMAN;tr|D6RE79|D6RE79_HUMAN	2
K7EQ02	tr|K7EQ02|K7EQ02_HUMAN;tr|K7EQ55|K7EQ55_HUMAN;tr|K7EK33|K7EK33_HUMAN;sp|Q96EP5|DAZP1_HUMAN	2
Q52LJ0	sp|Q52LJ0|FA98B_HUMAN	2
P00441	sp|P00441|SODC_HUMAN;tr|H7BYH4|H7BYH4_HUMAN	2
Q14847	sp|Q14847|LASP1_HUMAN;tr|F6S2S5|F6S2S5_HUMAN;tr|C9J9W2|C9J9W2_HUMAN	2
O00203	sp|O00203|AP3B1_HUMAN	2
Q9UMY1	sp|Q9UMY1|NOL7_HUMAN	2
Q6GMV2	sp|Q6GMV2|SMYD5_HUMAN;tr|C9IYN9|C9IYN9_HUMAN	2
P62917	sp|P62917|RL8_HUMAN;tr|E9PKZ0|E9PKZ0_HUMAN;tr|G3V1A1|G3V1A1_HUMAN;tr|E9PKU4|E9PKU4_HUMAN	2
Q14558	sp|Q14558|KPRA_HUMAN;tr|B4DP31|B4DP31_HUMAN	2
Q9Y285	sp|Q9Y285|SYFA_HUMAN;tr|K7ER00|K7ER00_HUMAN;tr|K7ER16|K7ER16_HUMAN;tr|K7EPH2|K7EPH2_HUMAN	2
P13667	sp|P13667|PDIA4_HUMAN	2
P48735	sp|P48735|IDHP_HUMAN	2
Q5T3Q7	tr|Q5T3Q7|Q5T3Q7_HUMAN;sp|Q9H583|HEAT1_HUMAN	2
G3V1C3	tr|G3V1C3|G3V1C3_HUMAN;sp|Q9BZZ5|API5_HUMAN;tr|E9PQK6|E9PQK6_HUMAN	2
O75531	sp|O75531|BAF_HUMAN	2
Q96TC7	sp|Q96TC7|RMD3_HUMAN;tr|H0YMB1|H0YMB1_HUMAN	2
A0A2R8YGD1	tr|A0A2R8YGD1|A0A2R8YGD1_HUMAN;tr|A0A2R8YD45|A0A2R8YD45_HUMAN;sp|O14773|TPP1_HUMAN;tr|A0A2R8Y7U1|A0A2R8Y7U1_HUMAN	2
Q9UN37	sp|Q9UN37|VPS4A_HUMAN;tr|I3L4J1|I3L4J1_HUMAN	2
E9PNJ4	tr|E9PNJ4|E9PNJ4_HUMAN;sp|Q13586|STIM1_HUMAN;tr|G0XQ39|G0XQ39_HUMAN;tr|E9PIQ8|E9PIQ8_HUMAN;tr|H0YDB2|H0YDB2_HUMAN	2
O43813	sp|O43813|LANC1_HUMAN;tr|F8WDS9|F8WDS9_HUMAN;tr|E9PHS0|E9PHS0_HUMAN	2
P30041	sp|P30041|PRDX6_HUMAN	2
P22626	sp|P22626|ROA2_HUMAN;tr|A0A087WUI2|A0A087WUI2_HUMAN	2
P67809	sp|P67809|YBOX1_HUMAN;tr|H0Y449|H0Y449_HUMAN	2
P36551	sp|P36551|HEM6_HUMAN	2
P09651	sp|P09651|ROA1_HUMAN;tr|F8W6I7|F8W6I7_HUMAN;tr|H0YH80|H0YH80_HUMAN;tr|F8VZ49|F8VZ49_HUMAN;sp|Q32P51|RA1L2_HUMAN	2
Q13242	sp|Q13242|SRSF9_HUMAN;tr|H0YIB4|H0YIB4_HUMAN;tr|S4R3G0|S4R3G0_HUMAN	2
E5RIT6	tr|E5RIT6|E5RIT6_HUMAN;sp|Q9UNX3|RL26L_HUMAN;tr|E5RHH1|E5RHH1_HUMAN	2
Q15020	sp|Q15020|SART3_HUMAN;tr|F8VV04|F8VV04_HUMAN	2
P47985	sp|P47985|UCRI_HUMAN;sp|P0C7P4|UCRIL_HUMAN	2
A6NHR9	sp|A6NHR9|SMHD1_HUMAN;tr|J3KTL8|J3KTL8_HUMAN	2
Q9NUJ1	sp|Q9NUJ1|ABHDA_HUMAN	2
P42126	sp|P42126|ECI1_HUMAN;tr|Q96DC0|Q96DC0_HUMAN;tr|H3BS70|H3BS70_HUMAN	2
Q9NS69	sp|Q9NS69|TOM22_HUMAN	2
C9JJV6	tr|C9JJV6|C9JJV6_HUMAN;tr|C9JZL8|C9JZL8_HUMAN;tr|C9J5M0|C9J5M0_HUMAN;tr|C9JC07|C9JC07_HUMAN;sp|Q96S97|MYADM_HUMAN	2
Q96P70	sp|Q96P70|IPO9_HUMAN	2
P13010	sp|P13010|XRCC5_HUMAN	2
P51812	sp|P51812|KS6A3_HUMAN;tr|B4DG22|B4DG22_HUMAN;tr|B1AXG1|B1AXG1_HUMAN;tr|B7ZB17|B7ZB17_HUMAN;tr|A0A2R8Y603|A0A2R8Y603_HUMAN	2
Q13838	sp|Q13838|DX39B_HUMAN;tr|A0A0G2JJZ9|A0A0G2JJZ9_HUMAN;tr|Q5STU3|Q5STU3_HUMAN;tr|F6WLT2|F6WLT2_HUMAN;tr|A0A140T9X3|A0A140T9X3_HUMAN;tr|A0A140T996|A0A140T996_HUMAN;tr|A0A140T9X9|A0A140T9X9_HUMAN;tr|A0A0A0MT12|A0A0A0MT12_HUMAN;tr|F6TRA5|F6TRA5_HUMAN;tr|F6UJC5|F6UJC5_HUMAN;tr|A0A140TA18|A0A140TA18_HUMAN	2
Q01518	sp|Q01518|CAP1_HUMAN	2
Q5VYK3	sp|Q5VYK3|ECM29_HUMAN;tr|J3KN16|J3KN16_HUMAN	2
Q9BSE5	sp|Q9BSE5|SPEB_HUMAN	2
P35914	sp|P35914|HMGCL_HUMAN	2
H3BLU7	tr|H3BLU7|H3BLU7_HUMAN;sp|O43488|ARK72_HUMAN	2
M0R208	tr|M0R208|M0R208_HUMAN;sp|Q16740|CLPP_HUMAN	2
E9PS17	tr|E9PS17|E9PS17_HUMAN;tr|E9PK59|E9PK59_HUMAN;sp|Q96KG9|SCYL1_HUMAN;tr|E9PPN3|E9PPN3_HUMAN	2
P08579	sp|P08579|RU2B_HUMAN	2
H7BYN3	tr|H7BYN3|H7BYN3_HUMAN;sp|Q00059|TFAM_HUMAN	2
R9WNI0	tr|R9WNI0|R9WNI0_HUMAN;tr|A8MQB8|A8MQB8_HUMAN;tr|G3V0J0|G3V0J0_HUMAN;sp|Q06787|FMR1_HUMAN;tr|A0A087WXI3|A0A087WXI3_HUMAN	2
O00625	sp|O00625|PIR_HUMAN	2
Q5T8U5	tr|Q5T8U5|Q5T8U5_HUMAN;sp|O15260|SURF4_HUMAN;tr|B7Z1G8|B7Z1G8_HUMAN	2
G5EA31	tr|G5EA31|G5EA31_HUMAN;sp|P53992|SC24C_HUMAN	2
Q9NVP1	sp|Q9NVP1|DDX18_HUMAN	2
P11172	sp|P11172|UMPS_HUMAN;tr|E9PFD2|E9PFD2_HUMAN	2
H0YDP7	tr|H0YDP7|H0YDP7_HUMAN;sp|Q13405|RM49_HUMAN	2
J3KRS1	tr|J3KRS1|J3KRS1_HUMAN;tr|A0A0C4DGQ8|A0A0C4DGQ8_HUMAN;sp|Q6IAN0|DRS7B_HUMAN	2
P61978	sp|P61978|HNRPK_HUMAN;tr|Q5T6W2|Q5T6W2_HUMAN	2
P47897	sp|P47897|SYQ_HUMAN;tr|A0A1B0GVU9|A0A1B0GVU9_HUMAN;tr|B4DDN1|B4DDN1_HUMAN	2
Q8NBS9	sp|Q8NBS9|TXND5_HUMAN	2
P0DMN0	sp|P0DMN0|ST1A4_HUMAN;sp|P0DMM9|ST1A3_HUMAN;tr|A0A0A6YYL2|A0A0A6YYL2_HUMAN	2
A0A3B3IUA2	tr|A0A3B3IUA2|A0A3B3IUA2_HUMAN;sp|P55769|NH2L1_HUMAN;tr|B1AHD1|B1AHD1_HUMAN	2
Q7Z2W9	sp|Q7Z2W9|RM21_HUMAN;tr|F5H7V8|F5H7V8_HUMAN	2
Q9BTT6	sp|Q9BTT6|LRRC1_HUMAN	2
Q3LXA3	sp|Q3LXA3|TKFC_HUMAN;tr|H0YCY6|H0YCY6_HUMAN	2
P45954	sp|P45954|ACDSB_HUMAN	2
Q92896	sp|Q92896|GSLG1_HUMAN	2
Q14166	sp|Q14166|TTL12_HUMAN	2
P39748	sp|P39748|FEN1_HUMAN;tr|F5H1Y3|F5H1Y3_HUMAN	2
Q96DG6	sp|Q96DG6|CMBL_HUMAN	2
Q9NQ94	sp|Q9NQ94|A1CF_HUMAN;tr|F8W9F8|F8W9F8_HUMAN	2
P40939	sp|P40939|ECHA_HUMAN;tr|H0YFD6|H0YFD6_HUMAN;tr|A0A2R8Y4F5|A0A2R8Y4F5_HUMAN;tr|A0A2R8YG21|A0A2R8YG21_HUMAN	2
P02787	sp|P02787|TRFE_HUMAN	2
P16403	sp|P16403|H12_HUMAN;sp|P16402|H13_HUMAN	2
Q9UMS4	sp|Q9UMS4|PRP19_HUMAN	2
A0A087WVZ9	tr|A0A087WVZ9|A0A087WVZ9_HUMAN;sp|P19388|RPAB1_HUMAN;tr|A0A087WWX0|A0A087WWX0_HUMAN;tr|A0A0A0MQR7|A0A0A0MQR7_HUMAN	2
A0A0A0MRN4	tr|A0A0A0MRN4|A0A0A0MRN4_HUMAN;sp|Q5BKZ1|ZN326_HUMAN	2
Q9HC35	sp|Q9HC35|EMAL4_HUMAN;tr|B5MBZ0|B5MBZ0_HUMAN	2
P31948	sp|P31948|STIP1_HUMAN	2
F5GZS6	tr|F5GZS6|F5GZS6_HUMAN;sp|P08195|4F2_HUMAN;tr|J3KPF3|J3KPF3_HUMAN	2
P38919	sp|P38919|IF4A3_HUMAN;tr|I3L3H2|I3L3H2_HUMAN	2
Q8IXI1	sp|Q8IXI1|MIRO2_HUMAN;tr|H3BST5|H3BST5_HUMAN;tr|I3L2C6|I3L2C6_HUMAN	2
C9JBI3	tr|C9JBI3|C9JBI3_HUMAN;sp|P78330|SERB_HUMAN	2
O75436	sp|O75436|VP26A_HUMAN;tr|S4R3Q6|S4R3Q6_HUMAN	2
Q14739	sp|Q14739|LBR_HUMAN;tr|C9JXK0|C9JXK0_HUMAN	2
Q99848	sp|Q99848|EBP2_HUMAN;tr|H7C2Q8|H7C2Q8_HUMAN	2
Q01650	sp|Q01650|LAT1_HUMAN;tr|H0YJ95|H0YJ95_HUMAN;tr|A0A0C4DGL4|A0A0C4DGL4_HUMAN;tr|G3V4Z6|G3V4Z6_HUMAN;sp|Q9UM01|YLAT1_HUMAN;sp|Q92536|YLAT2_HUMAN	2
Q8WX92	sp|Q8WX92|NELFB_HUMAN	2
Q9Y312	sp|Q9Y312|AAR2_HUMAN;tr|A2A2Q9|A2A2Q9_HUMAN	2
O43390	sp|O43390|HNRPR_HUMAN;tr|B4DT28|B4DT28_HUMAN	2
P32119	sp|P32119|PRDX2_HUMAN;tr|A6NIW5|A6NIW5_HUMAN	2
Q14498	sp|Q14498|RBM39_HUMAN;tr|G3XAC6|G3XAC6_HUMAN;tr|A0A0U1RQH7|A0A0U1RQH7_HUMAN;tr|H0Y4X3|H0Y4X3_HUMAN	2
C9JFR7	tr|C9JFR7|C9JFR7_HUMAN;sp|P99999|CYC_HUMAN	2
P19623	sp|P19623|SPEE_HUMAN	2
Q71UM5	sp|Q71UM5|RS27L_HUMAN;tr|H0YMV8|H0YMV8_HUMAN;tr|C9JLI6|C9JLI6_HUMAN	2
H3BQ52	tr|H3BQ52|H3BQ52_HUMAN;tr|H3BTD3|H3BTD3_HUMAN;sp|P56211|ARP19_HUMAN;sp|O43768|ENSA_HUMAN;tr|H3BMD8|H3BMD8_HUMAN;tr|A6NMQ3|A6NMQ3_HUMAN;tr|Q5T5H1|Q5T5H1_HUMAN	2
Q8NB78	sp|Q8NB78|KDM1B_HUMAN;tr|H0Y6H0|H0Y6H0_HUMAN	2
C9JA28	tr|C9JA28|C9JA28_HUMAN;sp|Q9UNL2|SSRG_HUMAN	2
K7EQ23	tr|K7EQ23|K7EQ23_HUMAN;sp|O15118|NPC1_HUMAN	2
P12268	sp|P12268|IMDH2_HUMAN;tr|H0Y4R1|H0Y4R1_HUMAN	2
Q7Z2K6	sp|Q7Z2K6|ERMP1_HUMAN;tr|E7ER77|E7ER77_HUMAN	2
Q6YN16	sp|Q6YN16|HSDL2_HUMAN	2
Q92734	sp|Q92734|TFG_HUMAN;tr|C9JJP5|C9JJP5_HUMAN;tr|C9JUE0|C9JUE0_HUMAN	2
P62942	sp|P62942|FKB1A_HUMAN;tr|Q5W0X3|Q5W0X3_HUMAN;tr|A0A087WZM5|A0A087WZM5_HUMAN;tr|Q1JUQ5|Q1JUQ5_HUMAN	2
H3BPK3	tr|H3BPK3|H3BPK3_HUMAN;sp|Q16775|GLO2_HUMAN;tr|H3BPQ4|H3BPQ4_HUMAN	2
O60869	sp|O60869|EDF1_HUMAN	2
D6RBD7	tr|D6RBD7|D6RBD7_HUMAN;tr|C9J1V9|C9J1V9_HUMAN;sp|O43324|MCA3_HUMAN;tr|H0YAL7|H0YAL7_HUMAN	2
X6R700	tr|X6R700|X6R700_HUMAN;sp|Q9Y3Y2|CHTOP_HUMAN;tr|A0A087X1B7|A0A087X1B7_HUMAN;tr|Q5T7Y7|Q5T7Y7_HUMAN	2
A0A1W2PPS1	tr|A0A1W2PPS1|A0A1W2PPS1_HUMAN;sp|Q00839|HNRPU_HUMAN;tr|A0A1X7SBS1|A0A1X7SBS1_HUMAN;tr|A0A1W2PP35|A0A1W2PP35_HUMAN;tr|Q5RI18|Q5RI18_HUMAN;tr|A0A1W2PQL0|A0A1W2PQL0_HUMAN;tr|A0A1W2PP34|A0A1W2PP34_HUMAN;tr|A0A1W2PPL4|A0A1W2PPL4_HUMAN;tr|A0A1W2PPH7|A0A1W2PPH7_HUMAN;tr|A0A1W2PRZ7|A0A1W2PRZ7_HUMAN;tr|A0A1W2PQ74|A0A1W2PQ74_HUMAN;tr|A0A1W2PQD4|A0A1W2PQD4_HUMAN	2
P49588	sp|P49588|SYAC_HUMAN	2
Q96I99	sp|Q96I99|SUCB2_HUMAN;tr|E9PDQ8|E9PDQ8_HUMAN	2
A0A3B3ITP6	tr|A0A3B3ITP6|A0A3B3ITP6_HUMAN;tr|A0A3B3IS57|A0A3B3IS57_HUMAN;tr|A0A3B3IU45|A0A3B3IU45_HUMAN;sp|P33991|MCM4_HUMAN;tr|A0A3B3IT92|A0A3B3IT92_HUMAN;tr|E5RG31|E5RG31_HUMAN	2
Q5LJA5	tr|Q5LJA5|Q5LJA5_HUMAN;tr|Q5LJB0|Q5LJB0_HUMAN;sp|Q9Y5K5|UCHL5_HUMAN;tr|Q5LJA9|Q5LJA9_HUMAN;tr|H0Y4K0|H0Y4K0_HUMAN;tr|H0Y636|H0Y636_HUMAN;tr|H0Y4E0|H0Y4E0_HUMAN;tr|H0Y6Y4|H0Y6Y4_HUMAN	2
Q9Y2R4	sp|Q9Y2R4|DDX52_HUMAN	2
P82909	sp|P82909|RT36_HUMAN	2
F5H1S9	tr|F5H1S9|F5H1S9_HUMAN;tr|G8JLB3|G8JLB3_HUMAN;sp|Q9Y606|TRUA_HUMAN	2
P68036	sp|P68036|UB2L3_HUMAN;sp|A0A1B0GUS4|UB2L5_HUMAN	2
Q3MHD2	sp|Q3MHD2|LSM12_HUMAN;tr|K7ELG9|K7ELG9_HUMAN	2
Q9Y2R5	sp|Q9Y2R5|RT17_HUMAN;tr|I3L0E3|I3L0E3_HUMAN;tr|E9PE17|E9PE17_HUMAN	2
Q9UQ80	sp|Q9UQ80|PA2G4_HUMAN;tr|F8VR77|F8VR77_HUMAN	2
P09525	sp|P09525|ANXA4_HUMAN;tr|Q6P452|Q6P452_HUMAN	2
Q96KR1	sp|Q96KR1|ZFR_HUMAN	2
Q13724	sp|Q13724|MOGS_HUMAN;tr|A0A3B3IRK6|A0A3B3IRK6_HUMAN;tr|C9J8D4|C9J8D4_HUMAN;tr|A0A3B3IRW2|A0A3B3IRW2_HUMAN;tr|A0A3B3IS52|A0A3B3IS52_HUMAN	2
P51649	sp|P51649|SSDH_HUMAN;tr|C9J8Q5|C9J8Q5_HUMAN	2
P26368	sp|P26368|U2AF2_HUMAN;tr|K7ENG2|K7ENG2_HUMAN	2
F8W7Q4	tr|F8W7Q4|F8W7Q4_HUMAN;sp|Q96A26|F162A_HUMAN;tr|E9PH05|E9PH05_HUMAN	2
P51654	sp|P51654|GPC3_HUMAN;tr|H0Y3U6|H0Y3U6_HUMAN	2
A0A0U1RRM8	tr|A0A0U1RRM8|A0A0U1RRM8_HUMAN;tr|H0YJ34|H0YJ34_HUMAN;sp|Q96AC1|FERM2_HUMAN	2
Q9BVJ6	sp|Q9BVJ6|UT14A_HUMAN	2
E7EQ29	tr|E7EQ29|E7EQ29_HUMAN;sp|P16278|BGAL_HUMAN	2
B7Z8V7	tr|B7Z8V7|B7Z8V7_HUMAN;sp|Q4G0N4|NAKD2_HUMAN;tr|H0Y9H7|H0Y9H7_HUMAN;tr|A0A0C4DGV3|A0A0C4DGV3_HUMAN	2
H0YG82	tr|H0YG82|H0YG82_HUMAN;sp|P82673|RT35_HUMAN	2
P36405	sp|P36405|ARL3_HUMAN	2
J3KSI4	tr|J3KSI4|J3KSI4_HUMAN;tr|I3L1D2|I3L1D2_HUMAN;tr|I3L4E0|I3L4E0_HUMAN;tr|J3QS48|J3QS48_HUMAN;tr|I3L295|I3L295_HUMAN;tr|J3KT75|J3KT75_HUMAN;tr|J3QW43|J3QW43_HUMAN;tr|J3QRD5|J3QRD5_HUMAN;sp|O75352|MPU1_HUMAN;tr|I3L405|I3L405_HUMAN;tr|I3L261|I3L261_HUMAN;tr|J3KTK8|J3KTK8_HUMAN;tr|J3QQZ4|J3QQZ4_HUMAN	2
Q8NFX7	sp|Q8NFX7|STXB6_HUMAN	2
Q9Y3B4	sp|Q9Y3B4|SF3B6_HUMAN	2
A0A1C7CYZ1	tr|A0A1C7CYZ1|A0A1C7CYZ1_HUMAN;sp|Q8TD08|MK15_HUMAN	2
Q92922	sp|Q92922|SMRC1_HUMAN	2
O75643	sp|O75643|U520_HUMAN	2
Q6P2Q9	sp|Q6P2Q9|PRP8_HUMAN	2
P50395	sp|P50395|GDIB_HUMAN	2
P20700	sp|P20700|LMNB1_HUMAN;tr|E9PBF6|E9PBF6_HUMAN;tr|A0A0D9SFE5|A0A0D9SFE5_HUMAN	2
Q8WXF1	sp|Q8WXF1|PSPC1_HUMAN;tr|X6RDA4|X6RDA4_HUMAN	2
Q02252	sp|Q02252|MMSA_HUMAN	2
C9IYN3	tr|C9IYN3|C9IYN3_HUMAN;tr|D6W592|D6W592_HUMAN;sp|Q8WVV9|HNRLL_HUMAN;tr|B7WPG3|B7WPG3_HUMAN	2
H0YJS4	tr|H0YJS4|H0YJS4_HUMAN;tr|G3V4T5|G3V4T5_HUMAN;sp|P05198|IF2A_HUMAN	2
P08559	sp|P08559|ODPA_HUMAN;tr|Q5JPT9|Q5JPT9_HUMAN;tr|Q5JPU0|Q5JPU0_HUMAN;tr|Q5JPU1|Q5JPU1_HUMAN	2
E9PES6	tr|E9PES6|E9PES6_HUMAN;tr|E7ES08|E7ES08_HUMAN;tr|E7EQU1|E7EQU1_HUMAN;sp|O15347|HMGB3_HUMAN	2
O95487	sp|O95487|SC24B_HUMAN	2
Q96ST2	sp|Q96ST2|IWS1_HUMAN;tr|A0A1B0GW95|A0A1B0GW95_HUMAN	2
Q8IWX8	sp|Q8IWX8|CHERP_HUMAN;tr|J3QK89|J3QK89_HUMAN	2
A0A0R4J2E8	tr|A0A0R4J2E8|A0A0R4J2E8_HUMAN;sp|P43243|MATR3_HUMAN;tr|A8MXP9|A8MXP9_HUMAN;tr|D6REM6|D6REM6_HUMAN;tr|D6R991|D6R991_HUMAN	2
O75116	sp|O75116|ROCK2_HUMAN;tr|E9PF63|E9PF63_HUMAN;tr|Q14DU5|Q14DU5_HUMAN	2
Q8WWM7	sp|Q8WWM7|ATX2L_HUMAN;tr|H3BUF6|H3BUF6_HUMAN	2
P37837	sp|P37837|TALDO_HUMAN;tr|F2Z393|F2Z393_HUMAN	2
P49591	sp|P49591|SYSC_HUMAN;tr|Q5T5C7|Q5T5C7_HUMAN	2
P27694	sp|P27694|RFA1_HUMAN	2
A0A024QZP7	tr|A0A024QZP7|A0A024QZP7_HUMAN;sp|P06493|CDK1_HUMAN;tr|E5RIU6|E5RIU6_HUMAN;tr|A0A087WZZ9|A0A087WZZ9_HUMAN	2
Q96P48	sp|Q96P48|ARAP1_HUMAN;tr|E7EU13|E7EU13_HUMAN;tr|A0A0A0MSJ2|A0A0A0MSJ2_HUMAN	2
Q9UL12	sp|Q9UL12|SARDH_HUMAN;tr|A0A0A0MT55|A0A0A0MT55_HUMAN;tr|Q5SYV1|Q5SYV1_HUMAN	2
O43290	sp|O43290|SNUT1_HUMAN	2
Q96IU4	sp|Q96IU4|ABHEB_HUMAN;tr|B4DQI4|B4DQI4_HUMAN;tr|F8W9U3|F8W9U3_HUMAN	2
J3QKY9	tr|J3QKY9|J3QKY9_HUMAN;tr|J3QLT5|J3QLT5_HUMAN;tr|A0A087WVI0|A0A087WVI0_HUMAN;tr|E9PBL8|E9PBL8_HUMAN;sp|Q8WTW3|COG1_HUMAN	2
P21964	sp|P21964|COMT_HUMAN;tr|E7EMS6|E7EMS6_HUMAN;tr|E7EUU8|E7EUU8_HUMAN	2
P04114	sp|P04114|APOB_HUMAN	2
Q13435	sp|Q13435|SF3B2_HUMAN;tr|E9PPJ0|E9PPJ0_HUMAN;tr|E9PJT3|E9PJT3_HUMAN	2
P18754	sp|P18754|RCC1_HUMAN;tr|C9JW69|C9JW69_HUMAN;tr|C9JRH2|C9JRH2_HUMAN;tr|C9J3R0|C9J3R0_HUMAN;tr|C9JMJ4|C9JMJ4_HUMAN;tr|C9JQZ4|C9JQZ4_HUMAN	2
A0A3B3ITZ9	tr|A0A3B3ITZ9|A0A3B3ITZ9_HUMAN;sp|Q9Y2W1|TR150_HUMAN	2
A0A286YF37	tr|A0A286YF37|A0A286YF37_HUMAN;sp|Q9UK22|FBX2_HUMAN	2
Q7Z3B4	sp|Q7Z3B4|NUP54_HUMAN	2
Q9UEY8	sp|Q9UEY8|ADDG_HUMAN	2
Q8WU90	sp|Q8WU90|ZC3HF_HUMAN	2
Q9NX58	sp|Q9NX58|LYAR_HUMAN;tr|D6RDJ1|D6RDJ1_HUMAN	2
A0A1W2PQV2	tr|A0A1W2PQV2|A0A1W2PQV2_HUMAN;tr|H3BUH9|H3BUH9_HUMAN;sp|P23434|GCSH_HUMAN	2
P49770	sp|P49770|EI2BB_HUMAN	2
K7EN05	tr|K7EN05|K7EN05_HUMAN;sp|P60002|ELOF1_HUMAN;tr|K7EPC8|K7EPC8_HUMAN;tr|A0A024R7E8|A0A024R7E8_HUMAN;tr|K7EQ44|K7EQ44_HUMAN;tr|K7EMV4|K7EMV4_HUMAN	2
Q9NVI7	sp|Q9NVI7|ATD3A_HUMAN	2
A0A1W2PNM1	tr|A0A1W2PNM1|A0A1W2PNM1_HUMAN;sp|Q16836|HCDH_HUMAN;tr|A0A0A0MSE2|A0A0A0MSE2_HUMAN;tr|A0A0D9SFP2|A0A0D9SFP2_HUMAN;tr|E9PF18|E9PF18_HUMAN;tr|A0A1W2PQ78|A0A1W2PQ78_HUMAN;tr|A0A1W2PQV5|A0A1W2PQV5_HUMAN;tr|A0A1W2PQC2|A0A1W2PQC2_HUMAN;tr|A0A1W2PRT2|A0A1W2PRT2_HUMAN	2
Q9Y6C9	sp|Q9Y6C9|MTCH2_HUMAN	2
Q5T760	tr|Q5T760|Q5T760_HUMAN;sp|Q05519|SRS11_HUMAN	2
C9J1X0	tr|C9J1X0|C9J1X0_HUMAN;sp|A4D1P6|WDR91_HUMAN	2
G3V158	tr|G3V158|G3V158_HUMAN;tr|E9PPM8|E9PPM8_HUMAN;sp|Q9Y315|DEOC_HUMAN;tr|E9PPK3|E9PPK3_HUMAN;tr|E9PMH9|E9PMH9_HUMAN;tr|E9PML7|E9PML7_HUMAN	2
P06576	sp|P06576|ATPB_HUMAN;tr|H0YH81|H0YH81_HUMAN;tr|F8W079|F8W079_HUMAN	2
A0A140TA44	tr|A0A140TA44|A0A140TA44_HUMAN;tr|A0A140TA32|A0A140TA32_HUMAN;tr|A0A140TA49|A0A140TA49_HUMAN;tr|F5GXS0|F5GXS0_HUMAN;tr|A0A140TA29|A0A140TA29_HUMAN;tr|A0A0G2JL54|A0A0G2JL54_HUMAN;sp|P0C0L4|CO4A_HUMAN;tr|A0A0G2JPR0|A0A0G2JPR0_HUMAN;sp|P0C0L5|CO4B_HUMAN;tr|A0A3B3ISA6|A0A3B3ISA6_HUMAN	2
P68363	sp|P68363|TBA1B_HUMAN	2
E7EQG2	tr|E7EQG2|E7EQG2_HUMAN;sp|Q14240|IF4A2_HUMAN	2
O75367	sp|O75367|H2AY_HUMAN	2
P31327	sp|P31327|CPSM_HUMAN	2
F6TR53	tr|F6TR53|F6TR53_HUMAN;sp|Q53T59|H1BP3_HUMAN	2
O14828	sp|O14828|SCAM3_HUMAN	2
A0A0C4DFV9	tr|A0A0C4DFV9|A0A0C4DFV9_HUMAN;sp|Q01105|SET_HUMAN;tr|A0A087X027|A0A087X027_HUMAN;sp|P0DME0|SETLP_HUMAN	2
C9IZC9	tr|C9IZC9|C9IZC9_HUMAN;tr|H7BZ75|H7BZ75_HUMAN;sp|O75600|KBL_HUMAN	2
F5H6N1	tr|F5H6N1|F5H6N1_HUMAN;sp|Q96A72|MGN2_HUMAN;tr|F5H124|F5H124_HUMAN	2
K7ES02	tr|K7ES02|K7ES02_HUMAN;sp|Q13867|BLMH_HUMAN;tr|K7ESE8|K7ESE8_HUMAN;tr|J3KSD8|J3KSD8_HUMAN	2
O95573	sp|O95573|ACSL3_HUMAN	2
E2QRB9	tr|E2QRB9|E2QRB9_HUMAN;tr|E9PIR7|E9PIR7_HUMAN;tr|F8W809|F8W809_HUMAN;tr|A0A087WSW9|A0A087WSW9_HUMAN;tr|A0A182DWI3|A0A182DWI3_HUMAN;tr|A0A087WSY9|A0A087WSY9_HUMAN;sp|Q16881|TRXR1_HUMAN;tr|E9PKD3|E9PKD3_HUMAN	2
P84103	sp|P84103|SRSF3_HUMAN;tr|A0A087X2D0|A0A087X2D0_HUMAN	2
Q99956	sp|Q99956|DUS9_HUMAN	2
A0A3B3IUB9	tr|A0A3B3IUB9|A0A3B3IUB9_HUMAN;sp|Q9NR09|BIRC6_HUMAN	2
A0A096LPI6	tr|A0A096LPI6|A0A096LPI6_HUMAN;tr|A0A096LNH5|A0A096LNH5_HUMAN;tr|H7C1F6|H7C1F6_HUMAN;tr|H7C2G3|H7C2G3_HUMAN;sp|P0DPI2|GAL3A_HUMAN;sp|A0A0B4J2D5|GAL3B_HUMAN;tr|A0A096LNJ1|A0A096LNJ1_HUMAN;tr|A0A096LP73|A0A096LP73_HUMAN;tr|A0A2R8Y6K9|A0A2R8Y6K9_HUMAN;tr|A0A2R8YDR7|A0A2R8YDR7_HUMAN;tr|F2Z2Q0|F2Z2Q0_HUMAN;tr|A0A096LP12|A0A096LP12_HUMAN;tr|A0A0B4J2H4|A0A0B4J2H4_HUMAN	2
O95104	sp|O95104|SFR15_HUMAN	2
Q9NVV4	sp|Q9NVV4|PAPD1_HUMAN	2
F8WEG8	tr|F8WEG8|F8WEG8_HUMAN;tr|G5E9Q4|G5E9Q4_HUMAN;tr|C9JMM3|C9JMM3_HUMAN;sp|O75569|PRKRA_HUMAN	2
Q9BSC4	sp|Q9BSC4|NOL10_HUMAN	2
Q9Y5B9	sp|Q9Y5B9|SP16H_HUMAN	2
Q13177	sp|Q13177|PAK2_HUMAN	2
P49736	sp|P49736|MCM2_HUMAN;tr|H0Y8E6|H0Y8E6_HUMAN	2
H7BXZ6	tr|H7BXZ6|H7BXZ6_HUMAN;sp|Q8IXI2|MIRO1_HUMAN;tr|J3QLG2|J3QLG2_HUMAN;tr|K7EP86|K7EP86_HUMAN;tr|K7EIQ7|K7EIQ7_HUMAN	2
P14373	sp|P14373|TRI27_HUMAN;tr|A0A0G2JIZ4|A0A0G2JIZ4_HUMAN	2
E7ETN3	tr|E7ETN3|E7ETN3_HUMAN;tr|B4E1Z4|B4E1Z4_HUMAN;tr|A0A0G2JH38|A0A0G2JH38_HUMAN;sp|P00751|CFAB_HUMAN	2
O75891	sp|O75891|AL1L1_HUMAN	2
Q15056	sp|Q15056|IF4H_HUMAN	2
Q14684	sp|Q14684|RRP1B_HUMAN	2
O14841	sp|O14841|OPLA_HUMAN	2
Q9H488	sp|Q9H488|OFUT1_HUMAN	2
A0A0A0MRA5	tr|A0A0A0MRA5|A0A0A0MRA5_HUMAN;tr|B7Z4B8|B7Z4B8_HUMAN;sp|Q9BUJ2|HNRL1_HUMAN;tr|M0QYZ0|M0QYZ0_HUMAN;tr|M0R3F1|M0R3F1_HUMAN	2
P24752	sp|P24752|THIL_HUMAN	2
Q93099	sp|Q93099|HGD_HUMAN	2
Q9NTK5	sp|Q9NTK5|OLA1_HUMAN;tr|J3KQ32|J3KQ32_HUMAN;tr|C9JTK6|C9JTK6_HUMAN	2
P26583	sp|P26583|HMGB2_HUMAN;tr|D6R9A6|D6R9A6_HUMAN	2
E9PF10	tr|E9PF10|E9PF10_HUMAN;sp|O75694|NU155_HUMAN	2
O43252	sp|O43252|PAPS1_HUMAN	2
Q9UGP8	sp|Q9UGP8|SEC63_HUMAN	2
H3BV80	tr|H3BV80|H3BV80_HUMAN;tr|H3BMM9|H3BMM9_HUMAN;tr|H3BTC0|H3BTC0_HUMAN;sp|Q15287|RNPS1_HUMAN;tr|H3BPG5|H3BPG5_HUMAN;tr|H3BMS0|H3BMS0_HUMAN	2
H0YDK8	tr|H0YDK8|H0YDK8_HUMAN;tr|E9PR38|E9PR38_HUMAN;tr|H0YEH2|H0YEH2_HUMAN;sp|Q14671|PUM1_HUMAN;tr|Q5T1Z4|Q5T1Z4_HUMAN;tr|Q5T1Z8|Q5T1Z8_HUMAN;tr|A0A0C4DG68|A0A0C4DG68_HUMAN;tr|A0A0A0MR59|A0A0A0MR59_HUMAN;sp|Q8TB72|PUM2_HUMAN	2
O43678	sp|O43678|NDUA2_HUMAN	2
Q9GZN8	sp|Q9GZN8|CT027_HUMAN	2
X6RI37	tr|X6RI37|X6RI37_HUMAN;sp|Q9UQ13|SHOC2_HUMAN	2
H7C048	tr|H7C048|H7C048_HUMAN;tr|K7EMQ8|K7EMQ8_HUMAN;tr|A0A2R8Y765|A0A2R8Y765_HUMAN;tr|J3QKS7|J3QKS7_HUMAN;tr|A0A2R8Y7U4|A0A2R8Y7U4_HUMAN;tr|A0A2U3TZQ7|A0A2U3TZQ7_HUMAN;tr|A0A2R8Y7I9|A0A2R8Y7I9_HUMAN;tr|A0A2R8Y4T4|A0A2R8Y4T4_HUMAN;tr|A0A2R8YES3|A0A2R8YES3_HUMAN;tr|A0A2R8Y855|A0A2R8Y855_HUMAN;tr|B4DGM3|B4DGM3_HUMAN;sp|Q969G3|SMCE1_HUMAN	2
Q9H8S9	sp|Q9H8S9|MOB1A_HUMAN;sp|Q7L9L4|MOB1B_HUMAN	2
Q15029	sp|Q15029|U5S1_HUMAN	2
Q9NSE4	sp|Q9NSE4|SYIM_HUMAN	2
P18669	sp|P18669|PGAM1_HUMAN	2
O60832	sp|O60832|DKC1_HUMAN;tr|C9IYT0|C9IYT0_HUMAN;tr|H7C0M1|H7C0M1_HUMAN	2
Q96AY3	sp|Q96AY3|FKB10_HUMAN	2
O95163	sp|O95163|ELP1_HUMAN;tr|F5H2T0|F5H2T0_HUMAN	2
Q53EP0	sp|Q53EP0|FND3B_HUMAN	2
Q92947	sp|Q92947|GCDH_HUMAN;tr|K7EKT3|K7EKT3_HUMAN	2
O43172	sp|O43172|PRP4_HUMAN	2
Q9NYV4	sp|Q9NYV4|CDK12_HUMAN	2
Q13595	sp|Q13595|TRA2A_HUMAN	2
A0A0U1RR23	tr|A0A0U1RR23|A0A0U1RR23_HUMAN;tr|A0A0A6YYL1|A0A0A6YYL1_HUMAN;sp|P49914|MTHFS_HUMAN;tr|A0A0U1RQM3|A0A0U1RQM3_HUMAN	2
O95168	sp|O95168|NDUB4_HUMAN	2
Q08211	sp|Q08211|DHX9_HUMAN	2
O43776	sp|O43776|SYNC_HUMAN	2
P49916	sp|P49916|DNLI3_HUMAN	2
Q9Y248	sp|Q9Y248|PSF2_HUMAN	2
Q9NPE3	sp|Q9NPE3|NOP10_HUMAN	2
P09960	sp|P09960|LKHA4_HUMAN	2
O76021	sp|O76021|RL1D1_HUMAN;tr|J3QSV6|J3QSV6_HUMAN;tr|I3L3C4|I3L3C4_HUMAN;tr|I3L3U9|I3L3U9_HUMAN	2
P28482	sp|P28482|MK01_HUMAN	2
P05556	sp|P05556|ITB1_HUMAN	2
P07305	sp|P07305|H10_HUMAN	2
Q92797	sp|Q92797|SYMPK_HUMAN;tr|A0A087WUE9|A0A087WUE9_HUMAN;tr|M0R3C7|M0R3C7_HUMAN	2
Q9NP97	sp|Q9NP97|DLRB1_HUMAN;sp|Q8TF09|DLRB2_HUMAN;tr|B1AKR6|B1AKR6_HUMAN	2
Q8TAT6	sp|Q8TAT6|NPL4_HUMAN;tr|I3L4U9|I3L4U9_HUMAN	2
P52597	sp|P52597|HNRPF_HUMAN	2
Q96I24	sp|Q96I24|FUBP3_HUMAN	2
Q9Y281	sp|Q9Y281|COF2_HUMAN	2
A5YKK6	sp|A5YKK6|CNOT1_HUMAN	2
P21549	sp|P21549|SPYA_HUMAN	2
O15126	sp|O15126|SCAM1_HUMAN;tr|A0A087WXB0|A0A087WXB0_HUMAN	2
K4DIB8	tr|K4DIB8|K4DIB8_HUMAN;tr|K4DIA8|K4DIA8_HUMAN;tr|E9PS95|E9PS95_HUMAN;tr|A0A0D9SEI9|A0A0D9SEI9_HUMAN;tr|A0A0D9SFE1|A0A0D9SFE1_HUMAN;tr|E9PJH7|E9PJH7_HUMAN;sp|Q9H936|GHC1_HUMAN	2
Q9BSH4	sp|Q9BSH4|TACO1_HUMAN	2
P14174	sp|P14174|MIF_HUMAN	2
Q99735	sp|Q99735|MGST2_HUMAN	2
P22102	sp|P22102|PUR2_HUMAN	2
Q99541	sp|Q99541|PLIN2_HUMAN	2
P07858	sp|P07858|CATB_HUMAN	2
P33993	sp|P33993|MCM7_HUMAN	2
Q13404	sp|Q13404|UB2V1_HUMAN;tr|I3L0A0|I3L0A0_HUMAN;tr|G3V2F7|G3V2F7_HUMAN	2
D6RDM7	tr|D6RDM7|D6RDM7_HUMAN;sp|P61086|UBE2K_HUMAN	2
A8MZF9	tr|A8MZF9|A8MZF9_HUMAN;sp|P55039|DRG2_HUMAN;tr|J3QR71|J3QR71_HUMAN;tr|J3QRI9|J3QRI9_HUMAN;tr|J3QKW7|J3QKW7_HUMAN	2
Q9Y587	sp|Q9Y587|AP4S1_HUMAN	2
P48507	sp|P48507|GSH0_HUMAN	2
P05091	sp|P05091|ALDH2_HUMAN	2
O00148	sp|O00148|DX39A_HUMAN;tr|K7EQN7|K7EQN7_HUMAN	2
P50225	sp|P50225|ST1A1_HUMAN;tr|H3BRY5|H3BRY5_HUMAN;sp|P50226|ST1A2_HUMAN	2
A0A087WZ13	tr|A0A087WZ13|A0A087WZ13_HUMAN;tr|E9PAU2|E9PAU2_HUMAN;sp|Q8IY67|RAVR1_HUMAN	2
Q96C23	sp|Q96C23|GALM_HUMAN;tr|H7C320|H7C320_HUMAN;tr|B8ZZ75|B8ZZ75_HUMAN	2
E7ETB7	tr|E7ETB7|E7ETB7_HUMAN;tr|E7EQ06|E7EQ06_HUMAN;tr|A0A0A0MS31|A0A0A0MS31_HUMAN;sp|Q14790|CASP8_HUMAN;tr|H7BZM4|H7BZM4_HUMAN;tr|E7EQ01|E7EQ01_HUMAN;tr|E7EVN1|E7EVN1_HUMAN;tr|C9JB29|C9JB29_HUMAN;tr|H7C0E2|H7C0E2_HUMAN	2
Q9NTZ6	sp|Q9NTZ6|RBM12_HUMAN	2
Q03252	sp|Q03252|LMNB2_HUMAN	2
Q08257	sp|Q08257|QOR_HUMAN;tr|C9JH92|C9JH92_HUMAN;tr|A6NP24|A6NP24_HUMAN	2
Q99856	sp|Q99856|ARI3A_HUMAN;tr|K7EJ04|K7EJ04_HUMAN	2
Q96RS6	sp|Q96RS6|NUDC1_HUMAN;tr|E5RGX7|E5RGX7_HUMAN	2
A0A1W2PPZ5	tr|A0A1W2PPZ5|A0A1W2PPZ5_HUMAN;sp|P23193|TCEA1_HUMAN;tr|A0A1W2PRL9|A0A1W2PRL9_HUMAN	2
Q14257	sp|Q14257|RCN2_HUMAN;tr|H0YL43|H0YL43_HUMAN	2
Q8NCW5	sp|Q8NCW5|NNRE_HUMAN	2
P31942	sp|P31942|HNRH3_HUMAN	2
Q08752	sp|Q08752|PPID_HUMAN	2
Q9H773	sp|Q9H773|DCTP1_HUMAN;tr|H3BSA6|H3BSA6_HUMAN	2
Q15102	sp|Q15102|PA1B3_HUMAN;tr|M0R389|M0R389_HUMAN;tr|M0R1K3|M0R1K3_HUMAN	2
H0YDD4	tr|H0YDD4|H0YDD4_HUMAN;sp|P10515|ODP2_HUMAN;tr|E9PEJ4|E9PEJ4_HUMAN	2
Q12904	sp|Q12904|AIMP1_HUMAN	2
P48147	sp|P48147|PPCE_HUMAN	2
P60983	sp|P60983|GMFB_HUMAN;tr|G3V4P8|G3V4P8_HUMAN;tr|G3V3X4|G3V3X4_HUMAN	2
P21399	sp|P21399|ACOC_HUMAN	2
Q5TDH0	sp|Q5TDH0|DDI2_HUMAN;tr|H0YII4|H0YII4_HUMAN;tr|H0YI90|H0YI90_HUMAN	2
Q5TEJ7	tr|Q5TEJ7|Q5TEJ7_HUMAN;sp|P15927|RFA2_HUMAN	2
Q96PE7	sp|Q96PE7|MCEE_HUMAN;tr|F5GZ54|F5GZ54_HUMAN;tr|H7BZS7|H7BZS7_HUMAN	2
Q06323	sp|Q06323|PSME1_HUMAN	2
P46060	sp|P46060|RAGP1_HUMAN	2
E9PDF6	tr|E9PDF6|E9PDF6_HUMAN;sp|O43795|MYO1B_HUMAN	2
P24666	sp|P24666|PPAC_HUMAN;tr|G5E9R5|G5E9R5_HUMAN	2
Q5R3I4	sp|Q5R3I4|TTC38_HUMAN;tr|H7C089|H7C089_HUMAN	2
P10644	sp|P10644|KAP0_HUMAN;tr|K7EPB2|K7EPB2_HUMAN;tr|K7EM13|K7EM13_HUMAN	2
Q8NFH3	sp|Q8NFH3|NUP43_HUMAN	2
Q13740	sp|Q13740|CD166_HUMAN;tr|H7C543|H7C543_HUMAN;tr|F5GXJ9|F5GXJ9_HUMAN	2
Q9NVH1	sp|Q9NVH1|DJC11_HUMAN;tr|B1AK20|B1AK20_HUMAN	2
Q9BQ67	sp|Q9BQ67|GRWD1_HUMAN;tr|M0QX71|M0QX71_HUMAN	2
C9JJV1	tr|C9JJV1|C9JJV1_HUMAN;sp|Q9Y5U2|TSSC4_HUMAN	2
Q6PK04	sp|Q6PK04|CC137_HUMAN;tr|I3L0U5|I3L0U5_HUMAN	2
P00367	sp|P00367|DHE3_HUMAN;sp|P49448|DHE4_HUMAN	2
P14866	sp|P14866|HNRPL_HUMAN;tr|M0QXS5|M0QXS5_HUMAN;tr|A0A3B3ITJ4|A0A3B3ITJ4_HUMAN	2
P09210	sp|P09210|GSTA2_HUMAN;sp|P08263|GSTA1_HUMAN;tr|Q5JW85|Q5JW85_HUMAN;sp|Q16772|GSTA3_HUMAN;sp|Q7RTV2|GSTA5_HUMAN	2
B1AHB1	tr|B1AHB1|B1AHB1_HUMAN;sp|P33992|MCM5_HUMAN;tr|B1AHB2|B1AHB2_HUMAN	2
Q15637	sp|Q15637|SF01_HUMAN;tr|F8WEV5|F8WEV5_HUMAN	2
O00267	sp|O00267|SPT5H_HUMAN	2
P49720	sp|P49720|PSB3_HUMAN;tr|A0A087WXQ8|A0A087WXQ8_HUMAN;tr|A0A087WY10|A0A087WY10_HUMAN;tr|A0A087WUL2|A0A087WUL2_HUMAN	2
Q01780	sp|Q01780|EXOSX_HUMAN	2
D6RG15	tr|D6RG15|D6RG15_HUMAN;sp|Q6IBS0|TWF2_HUMAN;tr|H0Y858|H0Y858_HUMAN	2
P21695	sp|P21695|GPDA_HUMAN	2
Q9Y2P8	sp|Q9Y2P8|RCL1_HUMAN;tr|Q5VYW8|Q5VYW8_HUMAN	2
Q9Y333	sp|Q9Y333|LSM2_HUMAN	2
P60468	sp|P60468|SC61B_HUMAN	2
Q00610	sp|Q00610|CLH1_HUMAN;tr|A0A087WVQ6|A0A087WVQ6_HUMAN	2
Q96AE4	sp|Q96AE4|FUBP1_HUMAN;tr|E9PEB5|E9PEB5_HUMAN	2
Q00266	sp|Q00266|METK1_HUMAN	2
P35659	sp|P35659|DEK_HUMAN;tr|H0Y8X0|H0Y8X0_HUMAN;tr|B4DFG0|B4DFG0_HUMAN;tr|D6RDA2|D6RDA2_HUMAN;tr|D6R9L5|D6R9L5_HUMAN	2
P24928	sp|P24928|RPB1_HUMAN	2
C9JTN7	tr|C9JTN7|C9JTN7_HUMAN;tr|F8W8I6|F8W8I6_HUMAN;sp|P31483|TIA1_HUMAN;tr|E5RGV5|E5RGV5_HUMAN;tr|H7BY49|H7BY49_HUMAN;tr|E5RG67|E5RG67_HUMAN	2
Q13363	sp|Q13363|CTBP1_HUMAN;tr|E9PGB1|E9PGB1_HUMAN;tr|E7ESU7|E7ESU7_HUMAN;tr|D6RAX2|D6RAX2_HUMAN;tr|E7EPF8|E7EPF8_HUMAN;tr|E7EUB3|E7EUB3_HUMAN	2
Q86SX6	sp|Q86SX6|GLRX5_HUMAN	2
E5RHI8	tr|E5RHI8|E5RHI8_HUMAN;tr|E5RFK2|E5RFK2_HUMAN;tr|E5RGF9|E5RGF9_HUMAN;sp|Q9NRY5|F1142_HUMAN	2
Q8WY22	sp|Q8WY22|BRI3B_HUMAN	2
E9PIU7	tr|E9PIU7|E9PIU7_HUMAN;tr|H0YEE4|H0YEE4_HUMAN;tr|E9PKH3|E9PKH3_HUMAN;sp|P62487|RPB7_HUMAN	2
Q13885	sp|Q13885|TBB2A_HUMAN;sp|Q9BVA1|TBB2B_HUMAN	2
P00390	sp|P00390|GSHR_HUMAN	2
Q12874	sp|Q12874|SF3A3_HUMAN	2
Q9BZE4	sp|Q9BZE4|NOG1_HUMAN;tr|Q5T3R7|Q5T3R7_HUMAN	2
Q96DI7	sp|Q96DI7|SNR40_HUMAN	2
Q9NWU1	sp|Q9NWU1|OXSM_HUMAN;tr|C9J2G3|C9J2G3_HUMAN;tr|C9JQQ2|C9JQQ2_HUMAN	2
O00273	sp|O00273|DFFA_HUMAN;tr|K7ERT1|K7ERT1_HUMAN	2
F5GWH5	tr|F5GWH5|F5GWH5_HUMAN;sp|P61165|TM258_HUMAN	2
P17152	sp|P17152|TMM11_HUMAN	2
Q9UJS0	sp|Q9UJS0|CMC2_HUMAN	2
P40925	sp|P40925|MDHC_HUMAN;tr|B9A041|B9A041_HUMAN;tr|B8ZZ51|B8ZZ51_HUMAN	2
P53004	sp|P53004|BIEA_HUMAN	2
Q96GD0	sp|Q96GD0|PLPP_HUMAN	2
O94760	sp|O94760|DDAH1_HUMAN;tr|B4DYP1|B4DYP1_HUMAN	2
P38646	sp|P38646|GRP75_HUMAN	2
P12956	sp|P12956|XRCC6_HUMAN;tr|B1AHC9|B1AHC9_HUMAN	2
A0A286YF22	tr|A0A286YF22|A0A286YF22_HUMAN;sp|O43175|SERA_HUMAN;tr|A0A2C9F2M7|A0A2C9F2M7_HUMAN;tr|A0A286YFA2|A0A286YFA2_HUMAN;tr|A0A286YFL2|A0A286YFL2_HUMAN;tr|A0A286YFM8|A0A286YFM8_HUMAN	2
K7EJE8	tr|K7EJE8|K7EJE8_HUMAN;tr|K7EKE6|K7EKE6_HUMAN;sp|P36776|LONM_HUMAN	2
Q7Z434	sp|Q7Z434|MAVS_HUMAN	2
P11413	sp|P11413|G6PD_HUMAN;tr|E7EUI8|E7EUI8_HUMAN;tr|E9PD92|E9PD92_HUMAN;tr|E7EM57|E7EM57_HUMAN	2
O95831	sp|O95831|AIFM1_HUMAN	2
P31930	sp|P31930|QCR1_HUMAN	2
F1T0B3	tr|F1T0B3|F1T0B3_HUMAN;tr|A0A087X2G1|A0A087X2G1_HUMAN;sp|Q92499|DDX1_HUMAN	2
Q9Y237	sp|Q9Y237|PIN4_HUMAN;tr|H0Y4T6|H0Y4T6_HUMAN;tr|J3KMW3|J3KMW3_HUMAN;tr|H0Y8P6|H0Y8P6_HUMAN;tr|H0Y610|H0Y610_HUMAN	2
Q9UI30	sp|Q9UI30|TR112_HUMAN;tr|F5GX77|F5GX77_HUMAN;tr|F5GYQ2|F5GYQ2_HUMAN	2
P55084	sp|P55084|ECHB_HUMAN;tr|F5GZQ3|F5GZQ3_HUMAN;tr|B5MD38|B5MD38_HUMAN	2
Q9UQ35	sp|Q9UQ35|SRRM2_HUMAN	2
A0A0A0MT83	tr|A0A0A0MT83|A0A0A0MT83_HUMAN;sp|P26440|IVD_HUMAN;tr|H0YLC3|H0YLC3_HUMAN;tr|H7C4G6|H7C4G6_HUMAN	2
Q15019	sp|Q15019|SEPT2_HUMAN;tr|B5MCX3|B5MCX3_HUMAN;tr|H7C2Y0|H7C2Y0_HUMAN	2
D6R9P3	tr|D6R9P3|D6R9P3_HUMAN;tr|D6RD18|D6RD18_HUMAN;tr|D6RBZ0|D6RBZ0_HUMAN;sp|Q99729|ROAA_HUMAN	2
Q68CK6	sp|Q68CK6|ACS2B_HUMAN;tr|H3BTX9|H3BTX9_HUMAN;tr|H3BNJ9|H3BNJ9_HUMAN;tr|E7EPS5|E7EPS5_HUMAN;sp|Q08AH3|ACS2A_HUMAN	2
E9PKL9	tr|E9PKL9|E9PKL9_HUMAN;sp|Q13630|FCL_HUMAN;tr|E9PP60|E9PP60_HUMAN;tr|E9PLH9|E9PLH9_HUMAN;tr|E9PP14|E9PP14_HUMAN;tr|A0A0J9YX13|A0A0J9YX13_HUMAN	2
F8VQX6	tr|F8VQX6|F8VQX6_HUMAN;tr|H0YI09|H0YI09_HUMAN;sp|Q9H8H3|MET7A_HUMAN	2
Q9NXS2	sp|Q9NXS2|QPCTL_HUMAN;tr|K7EQG1|K7EQG1_HUMAN	2
C9JLJ1	tr|C9JLJ1|C9JLJ1_HUMAN;tr|C9JCK0|C9JCK0_HUMAN;tr|C9JBN1|C9JBN1_HUMAN;tr|A0A0D9SF25|A0A0D9SF25_HUMAN;tr|A0A1B0GUU2|A0A1B0GUU2_HUMAN;tr|F8W9D8|F8W9D8_HUMAN;tr|C9IYU9|C9IYU9_HUMAN;tr|A0A0D9SF63|A0A0D9SF63_HUMAN;sp|Q9BZK7|TBL1R_HUMAN	2
O95232	sp|O95232|LC7L3_HUMAN;tr|J3KPP4|J3KPP4_HUMAN;tr|D6RDI2|D6RDI2_HUMAN	2
P08243	sp|P08243|ASNS_HUMAN;tr|F8WEJ5|F8WEJ5_HUMAN	2
Q9NUB1	sp|Q9NUB1|ACS2L_HUMAN	2
P00387	sp|P00387|NB5R3_HUMAN;tr|B1AHF3|B1AHF3_HUMAN	2
P30520	sp|P30520|PURA2_HUMAN	2
B4E107	tr|B4E107|B4E107_HUMAN;tr|F5GXE4|F5GXE4_HUMAN;tr|B4DK25|B4DK25_HUMAN;tr|H0Y5C2|H0Y5C2_HUMAN;sp|O95260|ATE1_HUMAN	2
P28066	sp|P28066|PSA5_HUMAN	2
P62258	sp|P62258|1433E_HUMAN	3
P62249	sp|P62249|RS16_HUMAN;tr|M0R210|M0R210_HUMAN;tr|M0R3H0|M0R3H0_HUMAN;tr|M0R1M5|M0R1M5_HUMAN;tr|Q6IPX4|Q6IPX4_HUMAN	3
O95433	sp|O95433|AHSA1_HUMAN;tr|G3V438|G3V438_HUMAN;tr|H0YJG7|H0YJG7_HUMAN;tr|H0YJ63|H0YJ63_HUMAN	3
O00303	sp|O00303|EIF3F_HUMAN	3
H0YLV5	tr|H0YLV5|H0YLV5_HUMAN;tr|H0YNJ6|H0YNJ6_HUMAN;tr|H0YMB3|H0YMB3_HUMAN;tr|A0A087WWM4|A0A087WWM4_HUMAN;sp|Q9P2T1|GMPR2_HUMAN;tr|F8WAN9|F8WAN9_HUMAN	3
P62854	sp|P62854|RS26_HUMAN;sp|Q5JNZ5|RS26L_HUMAN	3
Q969Q0	sp|Q969Q0|RL36L_HUMAN	3
C9J4Z3	tr|C9J4Z3|C9J4Z3_HUMAN;sp|P61513|RL37A_HUMAN;tr|M0R0A1|M0R0A1_HUMAN;tr|Q6P4E4|Q6P4E4_HUMAN;tr|E9PEL3|E9PEL3_HUMAN;tr|M0R2L6|M0R2L6_HUMAN;tr|G5E9R3|G5E9R3_HUMAN	3
H0YBS9	tr|H0YBS9|H0YBS9_HUMAN;sp|O00308|WWP2_HUMAN;sp|Q96J02|ITCH_HUMAN;sp|Q9H0M0|WWP1_HUMAN	3
P61626	sp|P61626|LYSC_HUMAN;tr|F8VV32|F8VV32_HUMAN;tr|A0A0B4J259|A0A0B4J259_HUMAN	3
P13639	sp|P13639|EF2_HUMAN	3
P09327	sp|P09327|VILI_HUMAN	3
A8K7Q2	tr|A8K7Q2|A8K7Q2_HUMAN	3
Q9UBB4	sp|Q9UBB4|ATX10_HUMAN;tr|A0A1W2PQD2|A0A1W2PQD2_HUMAN	3
G3V295	tr|G3V295|G3V295_HUMAN;sp|P60900|PSA6_HUMAN;tr|G3V5Z7|G3V5Z7_HUMAN;tr|G3V3I1|G3V3I1_HUMAN;tr|G3V3U4|G3V3U4_HUMAN	3
H0YMZ1	tr|H0YMZ1|H0YMZ1_HUMAN;tr|H0YL69|H0YL69_HUMAN;sp|P25789|PSA4_HUMAN;tr|H0YN18|H0YN18_HUMAN;tr|H0YMA1|H0YMA1_HUMAN;tr|H0YKT8|H0YKT8_HUMAN;tr|H0YLC2|H0YLC2_HUMAN;tr|H0YMI6|H0YMI6_HUMAN	3
P61011	sp|P61011|SRP54_HUMAN;tr|G3V4F7|G3V4F7_HUMAN	3
Q9UBF2	sp|Q9UBF2|COPG2_HUMAN	3
A0A024R6I7	tr|A0A024R6I7|A0A024R6I7_HUMAN;sp|P01009|A1AT_HUMAN;tr|A0A0G2JRN3|A0A0G2JRN3_HUMAN	3
O94874	sp|O94874|UFL1_HUMAN	3
A0A3B3ISG5	tr|A0A3B3ISG5|A0A3B3ISG5_HUMAN;sp|P14735|IDE_HUMAN	3
Q8TCT9	sp|Q8TCT9|HM13_HUMAN;tr|A0A3B3IUB5|A0A3B3IUB5_HUMAN;tr|A0A075B6F6|A0A075B6F6_HUMAN;tr|A0A0S2Z6F0|A0A0S2Z6F0_HUMAN;tr|A0A3B3IT72|A0A3B3IT72_HUMAN	3
P18085	sp|P18085|ARF4_HUMAN;tr|C9JPM4|C9JPM4_HUMAN;tr|F5H0C7|F5H0C7_HUMAN;tr|C9J1Z8|C9J1Z8_HUMAN;tr|C9JAK5|C9JAK5_HUMAN;sp|P84085|ARF5_HUMAN	3
Q13547	sp|Q13547|HDAC1_HUMAN	3
Q96IX5	sp|Q96IX5|USMG5_HUMAN	3
K7EQ77	tr|K7EQ77|K7EQ77_HUMAN;tr|K7EK78|K7EK78_HUMAN;sp|Q86Y39|NDUAB_HUMAN;tr|K7EP35|K7EP35_HUMAN;tr|K7EMT4|K7EMT4_HUMAN	3
D6RAA6	tr|D6RAA6|D6RAA6_HUMAN;sp|P57088|TMM33_HUMAN;tr|H0Y8N0|H0Y8N0_HUMAN	3
Q9BQE3	sp|Q9BQE3|TBA1C_HUMAN;tr|F5H5D3|F5H5D3_HUMAN;tr|A0A1W2PQM2|A0A1W2PQM2_HUMAN	3
P61247	sp|P61247|RS3A_HUMAN;tr|D6RG13|D6RG13_HUMAN;tr|D6RAT0|D6RAT0_HUMAN;tr|H0Y9Y4|H0Y9Y4_HUMAN;tr|D6RB09|D6RB09_HUMAN;tr|E9PFI5|E9PFI5_HUMAN;tr|H0Y8L7|H0Y8L7_HUMAN;tr|D6R9B6|D6R9B6_HUMAN	3
P12236	sp|P12236|ADT3_HUMAN;sp|P12235|ADT1_HUMAN	3
P62191	sp|P62191|PRS4_HUMAN	3
Q9Y3F4	sp|Q9Y3F4|STRAP_HUMAN	3
Q96HC4	sp|Q96HC4|PDLI5_HUMAN;tr|H0Y8Y3|H0Y8Y3_HUMAN	3
P40222	sp|P40222|TXLNA_HUMAN	3
Q15061	sp|Q15061|WDR43_HUMAN;tr|C9IZK7|C9IZK7_HUMAN	3
P42766	sp|P42766|RL35_HUMAN;tr|F2Z388|F2Z388_HUMAN	3
P53999	sp|P53999|TCP4_HUMAN	3
F8VYE8	tr|F8VYE8|F8VYE8_HUMAN;sp|P36873|PP1G_HUMAN;tr|F8VR82|F8VR82_HUMAN	3
A6NDG6	sp|A6NDG6|PGP_HUMAN	3
O75400	sp|O75400|PR40A_HUMAN;tr|A0A3F2YNY6|A0A3F2YNY6_HUMAN	3
P13693	sp|P13693|TCTP_HUMAN;tr|Q5W0H4|Q5W0H4_HUMAN;tr|A0A0B4J2C3|A0A0B4J2C3_HUMAN;tr|J3KPG2|J3KPG2_HUMAN;tr|E9PJF7|E9PJF7_HUMAN	3
O14925	sp|O14925|TIM23_HUMAN;tr|B4DDK6|B4DDK6_HUMAN;sp|Q5SRD1|TI23B_HUMAN	3
Q14232	sp|Q14232|EI2BA_HUMAN	3
A0A087WTU3	tr|A0A087WTU3|A0A087WTU3_HUMAN;sp|Q9Y6I9|TX264_HUMAN;tr|C9JL43|C9JL43_HUMAN;tr|C9JUC3|C9JUC3_HUMAN;tr|C9J7N0|C9J7N0_HUMAN;tr|C9JXQ7|C9JXQ7_HUMAN;tr|C9JHH5|C9JHH5_HUMAN	3
F8WF49	tr|F8WF49|F8WF49_HUMAN;tr|A0A0B4J2C2|A0A0B4J2C2_HUMAN;sp|Q9Y2H0|DLGP4_HUMAN	3
E9PLD3	tr|E9PLD3|E9PLD3_HUMAN;sp|E9PRG8|CK098_HUMAN;tr|A0A0B4J220|A0A0B4J220_HUMAN	3
P39023	sp|P39023|RL3_HUMAN;tr|G5E9G0|G5E9G0_HUMAN;tr|H7C422|H7C422_HUMAN;tr|B5MCW2|B5MCW2_HUMAN	3
D6RCD0	tr|D6RCD0|D6RCD0_HUMAN;sp|Q8NBQ5|DHB11_HUMAN	3
Q13564	sp|Q13564|ULA1_HUMAN	3
Q9NP61	sp|Q9NP61|ARFG3_HUMAN;tr|B0QYV8|B0QYV8_HUMAN	3
Q8N4V1	sp|Q8N4V1|MMGT1_HUMAN	3
A0A1B0GV06	tr|A0A1B0GV06|A0A1B0GV06_HUMAN;tr|A0A1B0GTP7|A0A1B0GTP7_HUMAN;tr|A0A1B0GUE3|A0A1B0GUE3_HUMAN;tr|A0A1B0GUG1|A0A1B0GUG1_HUMAN;tr|A0A1B0GUW4|A0A1B0GUW4_HUMAN;tr|E7EMM4|E7EMM4_HUMAN;tr|A0A1B0GW68|A0A1B0GW68_HUMAN;tr|A0A1B0GUA4|A0A1B0GUA4_HUMAN;tr|A0A1B0GTM3|A0A1B0GTM3_HUMAN;tr|A0A1B0GTZ5|A0A1B0GTZ5_HUMAN;tr|A0A1B0GUH5|A0A1B0GUH5_HUMAN;sp|Q13510|ASAH1_HUMAN	3
O14737	sp|O14737|PDCD5_HUMAN;tr|K7EQA1|K7EQA1_HUMAN	3
Q9Y262	sp|Q9Y262|EIF3L_HUMAN;tr|B0QY89|B0QY89_HUMAN;tr|B0QY90|B0QY90_HUMAN	3
P06737	sp|P06737|PYGL_HUMAN;tr|E9PK47|E9PK47_HUMAN	3
P05387	sp|P05387|RLA2_HUMAN;tr|H0YDD8|H0YDD8_HUMAN	3
P47755	sp|P47755|CAZA2_HUMAN;tr|C9JUG7|C9JUG7_HUMAN;tr|F8W9N7|F8W9N7_HUMAN;tr|A0A0D9SET8|A0A0D9SET8_HUMAN	3
O43837	sp|O43837|IDH3B_HUMAN;tr|A0A087WZN1|A0A087WZN1_HUMAN;tr|A0A087X2E5|A0A087X2E5_HUMAN;tr|A0A0D9SG66|A0A0D9SG66_HUMAN	3
P61009	sp|P61009|SPCS3_HUMAN	3
Q9H9J2	sp|Q9H9J2|RM44_HUMAN	3
P05455	sp|P05455|LA_HUMAN;tr|E7ERC4|E7ERC4_HUMAN;tr|E9PFL9|E9PFL9_HUMAN	3
E9PB90	tr|E9PB90|E9PB90_HUMAN;sp|P52789|HXK2_HUMAN	3
P50453	sp|P50453|SPB9_HUMAN	3
P10619	sp|P10619|PPGB_HUMAN;tr|X6R5C5|X6R5C5_HUMAN;tr|X6R8A1|X6R8A1_HUMAN;tr|Q5JZH0|Q5JZH0_HUMAN	3
Q04837	sp|Q04837|SSBP_HUMAN;tr|A0A0G2JLD8|A0A0G2JLD8_HUMAN;tr|E7EUY5|E7EUY5_HUMAN;tr|C9K0U8|C9K0U8_HUMAN	3
C9JIK8	tr|C9JIK8|C9JIK8_HUMAN;sp|Q9Y4P1|ATG4B_HUMAN;tr|F2Z2K8|F2Z2K8_HUMAN;tr|C9J3C0|C9J3C0_HUMAN;tr|H7C2A6|H7C2A6_HUMAN;tr|C9JQ72|C9JQ72_HUMAN	3
B3KME9	tr|B3KME9|B3KME9_HUMAN;sp|Q9NV06|DCA13_HUMAN;tr|A0A087WT20|A0A087WT20_HUMAN	3
P23526	sp|P23526|SAHH_HUMAN	3
P68032	sp|P68032|ACTC_HUMAN;sp|P63267|ACTH_HUMAN;sp|P68133|ACTS_HUMAN;sp|P62736|ACTA_HUMAN;tr|A6NL76|A6NL76_HUMAN;tr|C9JFL5|C9JFL5_HUMAN;tr|F6UVQ4|F6UVQ4_HUMAN;tr|F6QUT6|F6QUT6_HUMAN	3
Q13085	sp|Q13085|ACACA_HUMAN	3
C9JXB8	tr|C9JXB8|C9JXB8_HUMAN;tr|C9JNW5|C9JNW5_HUMAN;sp|P83731|RL24_HUMAN	3
G8JLD5	tr|G8JLD5|G8JLD5_HUMAN;sp|O00429|DNM1L_HUMAN;tr|F8VZ52|F8VZ52_HUMAN;tr|B4DDQ3|B4DDQ3_HUMAN	3
Q32P28	sp|Q32P28|P3H1_HUMAN	3
Q9Y2R0	sp|Q9Y2R0|COA3_HUMAN;tr|K7EPV0|K7EPV0_HUMAN	3
P23919	sp|P23919|KTHY_HUMAN;tr|H7BZ20|H7BZ20_HUMAN	3
P10809	sp|P10809|CH60_HUMAN	3
P49368	sp|P49368|TCPG_HUMAN;tr|B4DUR8|B4DUR8_HUMAN	3
P23396	sp|P23396|RS3_HUMAN;tr|E9PL09|E9PL09_HUMAN;tr|E9PPU1|E9PPU1_HUMAN;tr|F2Z2S8|F2Z2S8_HUMAN;tr|H0YEU2|H0YEU2_HUMAN;tr|H0YCJ7|H0YCJ7_HUMAN	3
P50991	sp|P50991|TCPD_HUMAN	3
P27797	sp|P27797|CALR_HUMAN;tr|K7EJB9|K7EJB9_HUMAN	3
P63104	sp|P63104|1433Z_HUMAN;tr|E7EX29|E7EX29_HUMAN;tr|B0AZS6|B0AZS6_HUMAN;tr|B7Z2E6|B7Z2E6_HUMAN;tr|H0YB80|H0YB80_HUMAN;tr|E7ESK7|E7ESK7_HUMAN	3
P62829	sp|P62829|RL23_HUMAN;tr|C9JD32|C9JD32_HUMAN;tr|J3KT29|J3KT29_HUMAN;tr|B9ZVP7|B9ZVP7_HUMAN	3
P62280	sp|P62280|RS11_HUMAN;tr|M0QZC5|M0QZC5_HUMAN	3
Q13283	sp|Q13283|G3BP1_HUMAN;tr|E5RIZ6|E5RIZ6_HUMAN	3
P05388	sp|P05388|RLA0_HUMAN;tr|F8VWS0|F8VWS0_HUMAN;tr|F8VU65|F8VU65_HUMAN;tr|F8VPE8|F8VPE8_HUMAN;tr|G3V210|G3V210_HUMAN;tr|F8VQY6|F8VQY6_HUMAN;tr|F8VRK7|F8VRK7_HUMAN;tr|F8VW21|F8VW21_HUMAN;sp|Q8NHW5|RLA0L_HUMAN;tr|F8VS58|F8VS58_HUMAN;tr|F8VZS0|F8VZS0_HUMAN	3
Q96QK1	sp|Q96QK1|VPS35_HUMAN	3
F8W7C6	tr|F8W7C6|F8W7C6_HUMAN	3
P62979	sp|P62979|RS27A_HUMAN;tr|A0A2R8Y422|A0A2R8Y422_HUMAN;tr|J3QS39|J3QS39_HUMAN;tr|J3QTR3|J3QTR3_HUMAN;tr|F5H6Q2|F5H6Q2_HUMAN;sp|P62987|RL40_HUMAN;tr|F5GYU3|F5GYU3_HUMAN;tr|F5H2Z3|F5H2Z3_HUMAN;tr|F5H265|F5H265_HUMAN;tr|B4DV12|B4DV12_HUMAN;tr|F5H388|F5H388_HUMAN;tr|F5H747|F5H747_HUMAN;tr|F5GXK7|F5GXK7_HUMAN;tr|J3QKN0|J3QKN0_HUMAN;tr|Q5PY61|Q5PY61_HUMAN;sp|P0CG47|UBB_HUMAN;tr|Q96C32|Q96C32_HUMAN;sp|P0C…	3
Q9NYY8	sp|Q9NYY8|FAKD2_HUMAN	3
P50914	sp|P50914|RL14_HUMAN;tr|E7EPB3|E7EPB3_HUMAN	3
P15104	sp|P15104|GLNA_HUMAN;tr|A0A2R8YDT1|A0A2R8YDT1_HUMAN	3
Q5JNW7	tr|Q5JNW7|Q5JNW7_HUMAN;tr|A0A140T998|A0A140T998_HUMAN;tr|X5D2R7|X5D2R7_HUMAN;sp|P28062|PSB8_HUMAN	3
P35606	sp|P35606|COPB2_HUMAN	3
P26641	sp|P26641|EF1G_HUMAN	3
P31946	sp|P31946|1433B_HUMAN	3
O14980	sp|O14980|XPO1_HUMAN	3
Q16531	sp|Q16531|DDB1_HUMAN;tr|F5GY55|F5GY55_HUMAN	3
P07737	sp|P07737|PROF1_HUMAN;tr|K7EJ44|K7EJ44_HUMAN	3
P09972	sp|P09972|ALDOC_HUMAN;tr|A8MVZ9|A8MVZ9_HUMAN;tr|J3KSV6|J3KSV6_HUMAN;tr|J3QKP5|J3QKP5_HUMAN	3
P61619	sp|P61619|S61A1_HUMAN;tr|B4DR61|B4DR61_HUMAN	3
J3KNQ3	tr|J3KNQ3|J3KNQ3_HUMAN;sp|Q9UNM6|PSD13_HUMAN;tr|A0A087WUL9|A0A087WUL9_HUMAN;tr|E9PL38|E9PL38_HUMAN	3
Q96T76	sp|Q96T76|MMS19_HUMAN;tr|H0Y746|H0Y746_HUMAN	3
Q9NUQ6	sp|Q9NUQ6|SPS2L_HUMAN;tr|B8ZZZ7|B8ZZZ7_HUMAN;tr|F8W6C2|F8W6C2_HUMAN;tr|C9JKE4|C9JKE4_HUMAN;tr|F8VZ02|F8VZ02_HUMAN;tr|F8VT91|F8VT91_HUMAN;tr|C9JGM8|C9JGM8_HUMAN	3
H7C2W9	tr|H7C2W9|H7C2W9_HUMAN;tr|C9JU56|C9JU56_HUMAN;tr|B7Z4E3|B7Z4E3_HUMAN;sp|P62899|RL31_HUMAN;tr|B7Z4C8|B7Z4C8_HUMAN;tr|B8ZZK4|B8ZZK4_HUMAN	3
Q9Y3B7	sp|Q9Y3B7|RM11_HUMAN	3
Q9UL25	sp|Q9UL25|RAB21_HUMAN	3
C9J979	tr|C9J979|C9J979_HUMAN;tr|C9IYS7|C9IYS7_HUMAN;tr|A0A087WYI0|A0A087WYI0_HUMAN;sp|Q5TA45|INT11_HUMAN;tr|J3QRY6|J3QRY6_HUMAN;tr|Q96HV7|Q96HV7_HUMAN	3
E9PH82	tr|E9PH82|E9PH82_HUMAN;sp|Q8NCA5|FA98A_HUMAN	3
P27449	sp|P27449|VATL_HUMAN	3
C9J144	tr|C9J144|C9J144_HUMAN;tr|C9IZ88|C9IZ88_HUMAN;sp|P26232|CTNA2_HUMAN	3
P11940	sp|P11940|PABP1_HUMAN;tr|E7EQV3|E7EQV3_HUMAN;tr|A0A087WTT1|A0A087WTT1_HUMAN;tr|E7ERJ7|E7ERJ7_HUMAN;tr|H0YAR2|H0YAR2_HUMAN	3
O76024	sp|O76024|WFS1_HUMAN	3
P34896	sp|P34896|GLYC_HUMAN	3
Q99436	sp|Q99436|PSB7_HUMAN	3
E9PRB9	tr|E9PRB9|E9PRB9_HUMAN;tr|E9PL01|E9PL01_HUMAN;sp|Q15005|SPCS2_HUMAN;tr|A0A087WUC6|A0A087WUC6_HUMAN;tr|E9PI68|E9PI68_HUMAN	3
Q9BTE1	sp|Q9BTE1|DCTN5_HUMAN;tr|H3BUD2|H3BUD2_HUMAN;tr|H3BS05|H3BS05_HUMAN;tr|H3BR94|H3BR94_HUMAN	3
A0A0A6YYA0	tr|A0A0A6YYA0|A0A0A6YYA0_HUMAN;sp|Q9Y3B3|TMED7_HUMAN;tr|G3V2Y2|G3V2Y2_HUMAN	3
Q99643	sp|Q99643|C560_HUMAN	3
Q9NZ01	sp|Q9NZ01|TECR_HUMAN;tr|M0R2N5|M0R2N5_HUMAN	3
P14868	sp|P14868|SYDC_HUMAN	3
A0A3B3ISZ5	tr|A0A3B3ISZ5|A0A3B3ISZ5_HUMAN;tr|A0A3B3IRI3|A0A3B3IRI3_HUMAN;sp|Q9UDY2|ZO2_HUMAN;tr|A0A3B3ITE1|A0A3B3ITE1_HUMAN;tr|A0A1B0GTW1|A0A1B0GTW1_HUMAN;tr|A0A2R8YDH4|A0A2R8YDH4_HUMAN;tr|A0A3B3IS03|A0A3B3IS03_HUMAN;tr|A0A3B3ISF1|A0A3B3ISF1_HUMAN;tr|A0A3B3IU51|A0A3B3IU51_HUMAN;tr|A0A3B3IRV6|A0A3B3IRV6_HUMAN	3
Q96AG4	sp|Q96AG4|LRC59_HUMAN	3
A0A0D9SFB3	tr|A0A0D9SFB3|A0A0D9SFB3_HUMAN;tr|A0A2R8YF78|A0A2R8YF78_HUMAN;tr|A0A0D9SG12|A0A0D9SG12_HUMAN;tr|A0A2R8YFS5|A0A2R8YFS5_HUMAN;tr|A0A2R8Y4A4|A0A2R8Y4A4_HUMAN;sp|O00571|DDX3X_HUMAN;tr|A0A0D9SF53|A0A0D9SF53_HUMAN;tr|A0A2R8Y5G6|A0A2R8Y5G6_HUMAN;tr|A0A2R8YCW1|A0A2R8YCW1_HUMAN;tr|A0A2R8YFR4|A0A2R8YFR4_HUMAN;tr|A0A2U3TZJ9|A0A2U3TZJ9_HUMAN;tr|A0A2R8Y645|A0A2R8Y645_HUMAN;tr|A0A2R8YDT5|A0A2R8YDT5_HUMAN;tr|A0…	3
P60228	sp|P60228|EIF3E_HUMAN;tr|E5RGA2|E5RGA2_HUMAN	3
P04181	sp|P04181|OAT_HUMAN	3
Q9UHG3	sp|Q9UHG3|PCYOX_HUMAN;tr|C9K055|C9K055_HUMAN;tr|F8W8W4|F8W8W4_HUMAN	3
P84077	sp|P84077|ARF1_HUMAN;sp|P61204|ARF3_HUMAN;tr|F5H423|F5H423_HUMAN	3
H0YLZ1	tr|H0YLZ1|H0YLZ1_HUMAN;tr|H0YN40|H0YN40_HUMAN;sp|P55010|IF5_HUMAN;tr|H0YMJ8|H0YMJ8_HUMAN;tr|H0YM54|H0YM54_HUMAN	3
P04424	sp|P04424|ARLY_HUMAN;tr|F8W943|F8W943_HUMAN	3
Q9Y676	sp|Q9Y676|RT18B_HUMAN;tr|A0A0G2JIC6|A0A0G2JIC6_HUMAN	3
P20290	sp|P20290|BTF3_HUMAN	3
J3QLR8	tr|J3QLR8|J3QLR8_HUMAN;sp|Q9Y3D9|RT23_HUMAN	3
O75223	sp|O75223|GGCT_HUMAN;tr|M0QZK8|M0QZK8_HUMAN	3
P48643	sp|P48643|TCPE_HUMAN;tr|B7ZAR1|B7ZAR1_HUMAN;tr|E9PCA1|E9PCA1_HUMAN;tr|E7ENZ3|E7ENZ3_HUMAN	3
P27348	sp|P27348|1433T_HUMAN	3
A0A087WUK2	tr|A0A087WUK2|A0A087WUK2_HUMAN;sp|O14979|HNRDL_HUMAN	3
P61326	sp|P61326|MGN_HUMAN;tr|F5H3U9|F5H3U9_HUMAN;tr|F5H6P7|F5H6P7_HUMAN	3
A0A087X020	tr|A0A087X020|A0A087X020_HUMAN;sp|Q9Y3A5|SBDS_HUMAN	3
P07099	sp|P07099|HYEP_HUMAN	3
O75396	sp|O75396|SC22B_HUMAN	3
E5RI99	tr|E5RI99|E5RI99_HUMAN;sp|P62888|RL30_HUMAN	3
P09661	sp|P09661|RU2A_HUMAN;tr|H0YLR3|H0YLR3_HUMAN;tr|H0YMA0|H0YMA0_HUMAN	3
P38432	sp|P38432|COIL_HUMAN	3
O15144	sp|O15144|ARPC2_HUMAN;tr|H7C3F9|H7C3F9_HUMAN	3
Q06210	sp|Q06210|GFPT1_HUMAN	3
P48637	sp|P48637|GSHB_HUMAN;tr|A0A2R8Y430|A0A2R8Y430_HUMAN;tr|A0A2R8Y5T7|A0A2R8Y5T7_HUMAN	3
O76094	sp|O76094|SRP72_HUMAN;tr|D6RDY6|D6RDY6_HUMAN	3
Q9NWH9	sp|Q9NWH9|SLTM_HUMAN;tr|H7BXE3|H7BXE3_HUMAN;tr|H0YLW7|H0YLW7_HUMAN;tr|H0YMW8|H0YMW8_HUMAN;tr|H0YNF3|H0YNF3_HUMAN;tr|H0YMR6|H0YMR6_HUMAN;tr|H0YLE6|H0YLE6_HUMAN;tr|H0YL55|H0YL55_HUMAN	3
E7EN77	tr|E7EN77|E7EN77_HUMAN;sp|Q15021|CND1_HUMAN	3
H0Y9M8	tr|H0Y9M8|H0Y9M8_HUMAN;sp|O43181|NDUS4_HUMAN	3
P14406	sp|P14406|CX7A2_HUMAN;tr|D6RIE3|D6RIE3_HUMAN;tr|D6RGV5|D6RGV5_HUMAN;tr|H0UI06|H0UI06_HUMAN;tr|D6R9C3|D6R9C3_HUMAN	3
O94979	sp|O94979|SC31A_HUMAN;tr|D6REX3|D6REX3_HUMAN;tr|D6RHZ5|D6RHZ5_HUMAN;tr|H7BXG7|H7BXG7_HUMAN	3
P12955	sp|P12955|PEPD_HUMAN	3
P46977	sp|P46977|STT3A_HUMAN	3
Q14258	sp|Q14258|TRI25_HUMAN;tr|A0A3B3IUA7|A0A3B3IUA7_HUMAN	3
A0A0D9SFK2	tr|A0A0D9SFK2|A0A0D9SFK2_HUMAN;sp|Q92614|MY18A_HUMAN	3
Q96P11	sp|Q96P11|NSUN5_HUMAN;sp|Q3KNT7|NSN5B_HUMAN;sp|Q63ZY6|NSN5C_HUMAN	3
Q8NBN7	sp|Q8NBN7|RDH13_HUMAN	3
P08240	sp|P08240|SRPRA_HUMAN	3
O95197	sp|O95197|RTN3_HUMAN	3
P63172	sp|P63172|DYLT1_HUMAN	3
P00846	sp|P00846|ATP6_HUMAN	3
Q9Y3L5	sp|Q9Y3L5|RAP2C_HUMAN;tr|F6U784|F6U784_HUMAN;tr|A0A087X2C3|A0A087X2C3_HUMAN;sp|P10114|RAP2A_HUMAN	3
E5RGM3	tr|E5RGM3|E5RGM3_HUMAN;tr|E7ERH2|E7ERH2_HUMAN;tr|F8W8N3|F8W8N3_HUMAN;tr|E5RJR5|E5RJR5_HUMAN;sp|P63208|SKP1_HUMAN	3
O60506	sp|O60506|HNRPQ_HUMAN	3
H3BR35	tr|H3BR35|H3BR35_HUMAN;sp|P15170|ERF3A_HUMAN;sp|Q8IYD1|ERF3B_HUMAN	3
O00232	sp|O00232|PSD12_HUMAN	3
P62136	sp|P62136|PP1A_HUMAN	3
A0A2R8YDQ9	tr|A0A2R8YDQ9|A0A2R8YDQ9_HUMAN;sp|Q9P2R7|SUCB1_HUMAN;tr|A0A2R8Y6Y7|A0A2R8Y6Y7_HUMAN;tr|Q5T9Q5|Q5T9Q5_HUMAN	3
O43396	sp|O43396|TXNL1_HUMAN;tr|K7ER96|K7ER96_HUMAN;tr|K7EML9|K7EML9_HUMAN	3
P0DP25	sp|P0DP25|CALM3_HUMAN;sp|P0DP24|CALM2_HUMAN;sp|P0DP23|CALM1_HUMAN;tr|H0Y7A7|H0Y7A7_HUMAN;tr|E7ETZ0|E7ETZ0_HUMAN;tr|E7EMB3|E7EMB3_HUMAN;tr|M0QZ52|M0QZ52_HUMAN;tr|Q96HY3|Q96HY3_HUMAN	3
F8W020	tr|F8W020|F8W020_HUMAN;tr|F8VXI6|F8VXI6_HUMAN;tr|F8VUX1|F8VUX1_HUMAN;tr|F8VY35|F8VY35_HUMAN;tr|F8W0J6|F8W0J6_HUMAN;tr|F5H4R6|F5H4R6_HUMAN;tr|H0YIV4|H0YIV4_HUMAN;sp|P55209|NP1L1_HUMAN;tr|H0YHC3|H0YHC3_HUMAN;tr|F8W118|F8W118_HUMAN;tr|F8VV59|F8VV59_HUMAN;tr|B7Z9C2|B7Z9C2_HUMAN;tr|F8VRJ2|F8VRJ2_HUMAN;tr|F8VVB5|F8VVB5_HUMAN;tr|H0YH88|H0YH88_HUMAN	3
P35754	sp|P35754|GLRX1_HUMAN	3
P07237	sp|P07237|PDIA1_HUMAN;tr|H7BZ94|H7BZ94_HUMAN;tr|H0Y3Z3|H0Y3Z3_HUMAN	3
P22234	sp|P22234|PUR6_HUMAN;tr|E9PBS1|E9PBS1_HUMAN;tr|D6RF62|D6RF62_HUMAN	3
A0A024R4M0	tr|A0A024R4M0|A0A024R4M0_HUMAN;sp|P46781|RS9_HUMAN;tr|B5MCT8|B5MCT8_HUMAN;tr|C9JM19|C9JM19_HUMAN	3
O15371	sp|O15371|EIF3D_HUMAN;tr|B0QYA5|B0QYA5_HUMAN	3
Q9Y3E5	sp|Q9Y3E5|PTH2_HUMAN;tr|J3KQ48|J3KQ48_HUMAN	3
H7C003	tr|H7C003|H7C003_HUMAN;sp|Q15435|PP1R7_HUMAN;tr|C9JD73|C9JD73_HUMAN;tr|C9J177|C9J177_HUMAN;tr|B5MBZ8|B5MBZ8_HUMAN	3
Q53S60	tr|Q53S60|Q53S60_HUMAN;tr|A0A3B3IS78|A0A3B3IS78_HUMAN;sp|O95342|ABCBB_HUMAN;tr|H7C0M2|H7C0M2_HUMAN;tr|A0A3B3ISD4|A0A3B3ISD4_HUMAN	3
Q96FX7	sp|Q96FX7|TRM61_HUMAN;tr|H0Y2Q1|H0Y2Q1_HUMAN	3
P04406	sp|P04406|G3P_HUMAN;tr|E7EUT5|E7EUT5_HUMAN	3
P63010	sp|P63010|AP2B1_HUMAN;tr|A0A087X253|A0A087X253_HUMAN	3
Q9P035	sp|Q9P035|HACD3_HUMAN;tr|H3BS72|H3BS72_HUMAN;tr|H3BPZ1|H3BPZ1_HUMAN	3
Q9Y3A6	sp|Q9Y3A6|TMED5_HUMAN;tr|B1AKT3|B1AKT3_HUMAN	3
O43592	sp|O43592|XPOT_HUMAN	3
P54886	sp|P54886|P5CS_HUMAN	3
A0A3B3IT15	tr|A0A3B3IT15|A0A3B3IT15_HUMAN;sp|P53621|COPA_HUMAN;tr|A0A3B3IS84|A0A3B3IS84_HUMAN;tr|A0A3B3ISC6|A0A3B3ISC6_HUMAN;tr|A0A3B3IU89|A0A3B3IU89_HUMAN	3
J3QRI7	tr|J3QRI7|J3QRI7_HUMAN;tr|J3QQQ9|J3QQQ9_HUMAN;tr|J3QQV1|J3QQV1_HUMAN;sp|P61254|RL26_HUMAN;tr|J3KSS0|J3KSS0_HUMAN;tr|J3QRC4|J3QRC4_HUMAN	3
J3KNF8	tr|J3KNF8|J3KNF8_HUMAN;tr|H3BUX2|H3BUX2_HUMAN;sp|O43169|CYB5B_HUMAN	3
Q08426	sp|Q08426|ECHP_HUMAN	3
E7ESV4	tr|E7ESV4|E7ESV4_HUMAN;tr|F5H7Y6|F5H7Y6_HUMAN;sp|P61224|RAP1B_HUMAN;tr|F5H6R7|F5H6R7_HUMAN;tr|F5H004|F5H004_HUMAN;tr|F5GX62|F5GX62_HUMAN;sp|A6NIZ1|RP1BL_HUMAN;tr|F5H4H0|F5H4H0_HUMAN;tr|F5GYH7|F5GYH7_HUMAN;tr|F5H077|F5H077_HUMAN;tr|F5GWU8|F5GWU8_HUMAN;tr|F5H491|F5H491_HUMAN;tr|F5H0B7|F5H0B7_HUMAN;tr|F5H500|F5H500_HUMAN;tr|F5H823|F5H823_HUMAN;tr|B7ZB78|B7ZB78_HUMAN;tr|F5GZG1|F5GZG1_HUMAN;tr|A0A075B…	3
H3BQF7	tr|H3BQF7|H3BQF7_HUMAN;tr|H3BMU1|H3BMU1_HUMAN;tr|H3BUI0|H3BUI0_HUMAN;sp|P53990|IST1_HUMAN;tr|F5GXM3|F5GXM3_HUMAN;tr|J3KR23|J3KR23_HUMAN;tr|H3BRE2|H3BRE2_HUMAN	3
O14561	sp|O14561|ACPM_HUMAN;tr|H3BNK3|H3BNK3_HUMAN	3
Q9NR31	sp|Q9NR31|SAR1A_HUMAN;tr|X1WI22|X1WI22_HUMAN;tr|D6RAA2|D6RAA2_HUMAN;tr|H0Y5E8|H0Y5E8_HUMAN;tr|Q5SQT8|Q5SQT8_HUMAN;tr|D6RDB2|D6RDB2_HUMAN	3
Q9UKD2	sp|Q9UKD2|MRT4_HUMAN	3
P43307	sp|P43307|SSRA_HUMAN;tr|A0A3B3IRT8|A0A3B3IRT8_HUMAN;tr|C9J3L8|C9J3L8_HUMAN;tr|C9J5W0|C9J5W0_HUMAN;tr|E9PAL7|E9PAL7_HUMAN;tr|C9IZQ1|C9IZQ1_HUMAN	3
A0A0C4DGS1	tr|A0A0C4DGS1|A0A0C4DGS1_HUMAN;sp|P39656|OST48_HUMAN;tr|U3KQ84|U3KQ84_HUMAN	3
A0A024RA52	tr|A0A024RA52|A0A024RA52_HUMAN;sp|P25787|PSA2_HUMAN	3
C9JNZ1	tr|C9JNZ1|C9JNZ1_HUMAN;tr|C9JVG3|C9JVG3_HUMAN;tr|C9JWG0|C9JWG0_HUMAN;tr|C9JTZ5|C9JTZ5_HUMAN;tr|C9JUW1|C9JUW1_HUMAN	3
Q04760	sp|Q04760|LGUL_HUMAN	3
Q9BT78	sp|Q9BT78|CSN4_HUMAN;tr|D6RFN0|D6RFN0_HUMAN;tr|D6RAX7|D6RAX7_HUMAN;tr|D6RD63|D6RD63_HUMAN	3
F5H702	tr|F5H702|F5H702_HUMAN;sp|Q96GC5|RM48_HUMAN	3
Q9HAB8	sp|Q9HAB8|PPCS_HUMAN;tr|Q5VVM3|Q5VVM3_HUMAN	3
P42704	sp|P42704|LPPRC_HUMAN	3
Q9Y2S7	sp|Q9Y2S7|PDIP2_HUMAN;tr|B4DEM9|B4DEM9_HUMAN	3
Q96C86	sp|Q96C86|DCPS_HUMAN;tr|A0A3B3ITF0|A0A3B3ITF0_HUMAN	3
P54709	sp|P54709|AT1B3_HUMAN;tr|C9JA36|C9JA36_HUMAN	3
P05141	sp|P05141|ADT2_HUMAN	3
Q9BWD1	sp|Q9BWD1|THIC_HUMAN	3
P22061	sp|P22061|PIMT_HUMAN;tr|A0A3F2YNX8|A0A3F2YNX8_HUMAN;tr|A0A0A0MRJ6|A0A0A0MRJ6_HUMAN;tr|H7BY58|H7BY58_HUMAN;tr|F6S8N6|F6S8N6_HUMAN	3
Q96PK6	sp|Q96PK6|RBM14_HUMAN	3
O14929	sp|O14929|HAT1_HUMAN	3
P28074	sp|P28074|PSB5_HUMAN;tr|H0YJM8|H0YJM8_HUMAN	3
Q9H3K2	sp|Q9H3K2|GHITM_HUMAN	3
J3QLE5	tr|J3QLE5|J3QLE5_HUMAN;sp|P63162|RSMN_HUMAN;sp|P14678|RSMB_HUMAN;tr|J3KRY3|J3KRY3_HUMAN;tr|S4R3P3|S4R3P3_HUMAN	3
P62750	sp|P62750|RL23A_HUMAN;tr|H7BY10|H7BY10_HUMAN;tr|K7ERT8|K7ERT8_HUMAN;tr|A8MUS3|A8MUS3_HUMAN;tr|K7EJV9|K7EJV9_HUMAN;tr|K7EMA7|K7EMA7_HUMAN	3
O14818	sp|O14818|PSA7_HUMAN;tr|H0Y586|H0Y586_HUMAN;tr|A0A087WYS6|A0A087WYS6_HUMAN;sp|Q8TAA3|PSMA8_HUMAN	3
P23381	sp|P23381|SYWC_HUMAN;tr|H0YJP3|H0YJP3_HUMAN	3
Q9Y5L4	sp|Q9Y5L4|TIM13_HUMAN	3
Q9Y512	sp|Q9Y512|SAM50_HUMAN	3
Q15185	sp|Q15185|TEBP_HUMAN;tr|A0A087WYT3|A0A087WYT3_HUMAN	3
Q9BQA1	sp|Q9BQA1|MEP50_HUMAN;tr|H0Y711|H0Y711_HUMAN	3
P46778	sp|P46778|RL21_HUMAN;tr|M0R181|M0R181_HUMAN	3
Q9BYD2	sp|Q9BYD2|RM09_HUMAN;tr|Q5SZR1|Q5SZR1_HUMAN	3
O95453	sp|O95453|PARN_HUMAN	3
Q8WVM0	sp|Q8WVM0|TFB1M_HUMAN	3
Q9NZ45	sp|Q9NZ45|CISD1_HUMAN	3
Q14152	sp|Q14152|EIF3A_HUMAN	3
P63244	sp|P63244|RACK1_HUMAN;tr|J3KPE3|J3KPE3_HUMAN;tr|D6RAC2|D6RAC2_HUMAN;tr|H0Y8W2|H0Y8W2_HUMAN;tr|D6REE5|D6REE5_HUMAN;tr|D6RHH4|D6RHH4_HUMAN;tr|H0YAM7|H0YAM7_HUMAN;tr|H0YAF8|H0YAF8_HUMAN;tr|D6RFX4|D6RFX4_HUMAN;tr|D6R9Z1|D6R9Z1_HUMAN;tr|D6R9L0|D6R9L0_HUMAN	3
P23284	sp|P23284|PPIB_HUMAN	3
P62241	sp|P62241|RS8_HUMAN;tr|Q5JR95|Q5JR95_HUMAN	3
O43242	sp|O43242|PSMD3_HUMAN	3
D6R9I9	tr|D6R9I9|D6R9I9_HUMAN;sp|P61221|ABCE1_HUMAN;tr|D6RGF4|D6RGF4_HUMAN	3
P49207	sp|P49207|RL34_HUMAN	3
P32969	sp|P32969|RL9_HUMAN;tr|E7ESE0|E7ESE0_HUMAN;tr|D6RAN4|D6RAN4_HUMAN;tr|A0A2R8Y5Y7|A0A2R8Y5Y7_HUMAN;tr|H0Y9V9|H0Y9V9_HUMAN	3
P54687	sp|P54687|BCAT1_HUMAN;tr|F5H2F2|F5H2F2_HUMAN	3
P62851	sp|P62851|RS25_HUMAN	3
Q9UNS2	sp|Q9UNS2|CSN3_HUMAN;tr|J3KTQ1|J3KTQ1_HUMAN;tr|J3QKR0|J3QKR0_HUMAN;tr|C9JLV5|C9JLV5_HUMAN	3
Q15006	sp|Q15006|EMC2_HUMAN	3
F5GWE5	tr|F5GWE5|F5GWE5_HUMAN;sp|Q00169|PIPNA_HUMAN;tr|I3L4H1|I3L4H1_HUMAN	3
A0A3B3ITG6	tr|A0A3B3ITG6|A0A3B3ITG6_HUMAN;sp|Q13144|EI2BE_HUMAN;tr|A0A3B3IUB1|A0A3B3IUB1_HUMAN;tr|A0A3B3ISV1|A0A3B3ISV1_HUMAN;tr|A0A3B3ITQ2|A0A3B3ITQ2_HUMAN;tr|A0A3B3IUF2|A0A3B3IUF2_HUMAN;tr|A0A3B3ISM8|A0A3B3ISM8_HUMAN;tr|A0A3B3ISX3|A0A3B3ISX3_HUMAN	3
P23297	sp|P23297|S10A1_HUMAN;tr|Q5T7Y6|Q5T7Y6_HUMAN	3
H0Y6T7	tr|H0Y6T7|H0Y6T7_HUMAN;sp|Q92542|NICA_HUMAN;tr|Q5T205|Q5T205_HUMAN;tr|H0Y3Z4|H0Y3Z4_HUMAN	3
P62495	sp|P62495|ERF1_HUMAN;tr|B7Z7P8|B7Z7P8_HUMAN	3
P43490	sp|P43490|NAMPT_HUMAN;tr|A0A0C4DFS8|A0A0C4DFS8_HUMAN	3
P49458	sp|P49458|SRP09_HUMAN;tr|E9PE20|E9PE20_HUMAN	3
P20340	sp|P20340|RAB6A_HUMAN;tr|F5H3K7|F5H3K7_HUMAN;tr|C9JU14|C9JU14_HUMAN;tr|J3KR73|J3KR73_HUMAN;sp|Q9NRW1|RAB6B_HUMAN	3
O60493	sp|O60493|SNX3_HUMAN;tr|A0A087X0R6|A0A087X0R6_HUMAN;sp|Q9UMY4|SNX12_HUMAN	3
F5GXX5	tr|F5GXX5|F5GXX5_HUMAN;sp|P61803|DAD1_HUMAN;tr|F5H895|F5H895_HUMAN;tr|A0A0B4J239|A0A0B4J239_HUMAN	3
O00410	sp|O00410|IPO5_HUMAN;tr|H0Y8C6|H0Y8C6_HUMAN	3
A0A087WUL4	tr|A0A087WUL4|A0A087WUL4_HUMAN;tr|A0A087WX23|A0A087WX23_HUMAN;tr|A0A087WXK2|A0A087WXK2_HUMAN;sp|Q86TG7|PEG10_HUMAN;tr|A0A087WZG9|A0A087WZG9_HUMAN;tr|B4DSP0|B4DSP0_HUMAN	3
Q9UL46	sp|Q9UL46|PSME2_HUMAN;tr|A0A087X1Z3|A0A087X1Z3_HUMAN;tr|H0YM70|H0YM70_HUMAN	3
P03915	sp|P03915|NU5M_HUMAN	3
Q8TEB1	sp|Q8TEB1|DCA11_HUMAN;tr|H0YM86|H0YM86_HUMAN;tr|H0YN92|H0YN92_HUMAN;tr|H0YL98|H0YL98_HUMAN;tr|H0YL77|H0YL77_HUMAN	3
Q969H8	sp|Q969H8|MYDGF_HUMAN;tr|M0QXF7|M0QXF7_HUMAN;tr|M0QYN0|M0QYN0_HUMAN	3
D3YTB1	tr|D3YTB1|D3YTB1_HUMAN;sp|P62910|RL32_HUMAN;tr|F8W727|F8W727_HUMAN	3
P62753	sp|P62753|RS6_HUMAN;tr|A2A3R5|A2A3R5_HUMAN	3
P62195	sp|P62195|PRS8_HUMAN;tr|J3QQM1|J3QQM1_HUMAN	3
Q9NQC3	sp|Q9NQC3|RTN4_HUMAN;tr|F8W914|F8W914_HUMAN	3
G3XAM7	tr|G3XAM7|G3XAM7_HUMAN;sp|P35221|CTNA1_HUMAN;tr|E5RIB1|E5RIB1_HUMAN	3
Q96SB4	sp|Q96SB4|SRPK1_HUMAN;tr|H3BLV9|H3BLV9_HUMAN	3
P54727	sp|P54727|RD23B_HUMAN	3
E9PGZ4	tr|E9PGZ4|E9PGZ4_HUMAN;sp|Q9NTJ5|SAC1_HUMAN;tr|C9JV50|C9JV50_HUMAN;tr|F8WDN7|F8WDN7_HUMAN	3
A0A2R8YFD1	tr|A0A2R8YFD1|A0A2R8YFD1_HUMAN;tr|A0A2R8Y3X5|A0A2R8Y3X5_HUMAN;sp|O60313|OPA1_HUMAN;tr|A0A2R8YE78|A0A2R8YE78_HUMAN;tr|A0A2R8YDM2|A0A2R8YDM2_HUMAN;tr|C9JMB8|C9JMB8_HUMAN;tr|E5KLJ9|E5KLJ9_HUMAN;tr|H7C141|H7C141_HUMAN	3
P17931	sp|P17931|LEG3_HUMAN;tr|G3V3R6|G3V3R6_HUMAN	3
Q99805	sp|Q99805|TM9S2_HUMAN	3
P02771	sp|P02771|FETA_HUMAN;tr|J3KMX3|J3KMX3_HUMAN	3
P60842	sp|P60842|IF4A1_HUMAN;tr|J3KT12|J3KT12_HUMAN;tr|J3QS69|J3QS69_HUMAN;tr|J3KTB5|J3KTB5_HUMAN;tr|J3QL43|J3QL43_HUMAN;tr|J3QLN6|J3QLN6_HUMAN;tr|J3QR64|J3QR64_HUMAN;tr|J3QKZ9|J3QKZ9_HUMAN;tr|J3KS25|J3KS25_HUMAN;tr|J3KSZ0|J3KSZ0_HUMAN	3
P09622	sp|P09622|DLDH_HUMAN;tr|E9PEX6|E9PEX6_HUMAN	3
Q9UKK9	sp|Q9UKK9|NUDT5_HUMAN;tr|A6NFX8|A6NFX8_HUMAN;tr|A6NJU6|A6NJU6_HUMAN;tr|A6NCQ0|A6NCQ0_HUMAN	3
P02794	sp|P02794|FRIH_HUMAN;tr|G3V192|G3V192_HUMAN;tr|E9PRK8|E9PRK8_HUMAN;tr|G3V1D1|G3V1D1_HUMAN;tr|E9PKY7|E9PKY7_HUMAN	3
H0YHS6	tr|H0YHS6|H0YHS6_HUMAN;sp|Q9Y2Z4|SYYM_HUMAN	3
F8VZ44	tr|F8VZ44|F8VZ44_HUMAN;sp|Q9NRG9|AAAS_HUMAN;tr|H3BU82|H3BU82_HUMAN	3
O43747	sp|O43747|AP1G1_HUMAN	3
O60763	sp|O60763|USO1_HUMAN	3
B4DK69	tr|B4DK69|B4DK69_HUMAN;sp|P52895|AK1C2_HUMAN;tr|S4R3P0|S4R3P0_HUMAN	3
P09110	sp|P09110|THIK_HUMAN;tr|H7C131|H7C131_HUMAN;tr|C9JDE9|C9JDE9_HUMAN;tr|H0Y4D4|H0Y4D4_HUMAN	3
P18583	sp|P18583|SON_HUMAN;tr|H7C1M2|H7C1M2_HUMAN	3
P24534	sp|P24534|EF1B_HUMAN	3
P13073	sp|P13073|COX41_HUMAN;tr|H3BN72|H3BN72_HUMAN;tr|H3BNV9|H3BNV9_HUMAN;tr|Q86WV2|Q86WV2_HUMAN;tr|H3BPG0|H3BPG0_HUMAN	3
Q9BUB7	sp|Q9BUB7|TMM70_HUMAN	3
F5H669	tr|F5H669|F5H669_HUMAN;sp|Q8N684|CPSF7_HUMAN;tr|J3QT54|J3QT54_HUMAN;tr|F5H6M0|F5H6M0_HUMAN;tr|F5H047|F5H047_HUMAN	3
P56134	sp|P56134|ATPK_HUMAN	3
A0A140T955	tr|A0A140T955|A0A140T955_HUMAN;tr|A0A140T933|A0A140T933_HUMAN;tr|A0A1W2PPQ2|A0A1W2PPQ2_HUMAN;tr|A0A1W2PRT9|A0A1W2PRT9_HUMAN;tr|A0A140T9I0|A0A140T9I0_HUMAN;sp|P10316|1A69_HUMAN;sp|P01892|1A02_HUMAN;tr|A0A140T9X5|A0A140T9X5_HUMAN;tr|A0A140T913|A0A140T913_HUMAN;tr|A0A1W2PRU9|A0A1W2PRU9_HUMAN;sp|Q31612|1B73_HUMAN;sp|P01891|1A68_HUMAN;tr|O19617|O19617_HUMAN;sp|P10321|1C07_HUMAN;tr|A0A140T921|A0A140T92…	3
Q6P1M0	sp|Q6P1M0|S27A4_HUMAN	3
O43865	sp|O43865|SAHH2_HUMAN	3
P36871	sp|P36871|PGM1_HUMAN;tr|A0A3B3ITK7|A0A3B3ITK7_HUMAN	3
Q9BQG0	sp|Q9BQG0|MBB1A_HUMAN;tr|I3L1L3|I3L1L3_HUMAN	3
P19823	sp|P19823|ITIH2_HUMAN;tr|Q5T985|Q5T985_HUMAN	3
Q16778	sp|Q16778|H2B2E_HUMAN;sp|P33778|H2B1B_HUMAN;sp|P23527|H2B1O_HUMAN;sp|P06899|H2B1J_HUMAN;sp|Q8N257|H2B3B_HUMAN	3
P48506	sp|P48506|GSH1_HUMAN;tr|A0A0C4DGB2|A0A0C4DGB2_HUMAN;tr|B4E2I4|B4E2I4_HUMAN;tr|A0A2R8YEL6|A0A2R8YEL6_HUMAN;tr|E1CEI4|E1CEI4_HUMAN	3
O00487	sp|O00487|PSDE_HUMAN	3
Q9BRX8	sp|Q9BRX8|PXL2A_HUMAN	3
P51148	sp|P51148|RAB5C_HUMAN;tr|K7ERI8|K7ERI8_HUMAN;tr|K7ERQ8|K7ERQ8_HUMAN	3
P11233	sp|P11233|RALA_HUMAN;tr|H7C3P7|H7C3P7_HUMAN;sp|P11234|RALB_HUMAN	3
E9PCN4	tr|E9PCN4|E9PCN4_HUMAN;sp|P57679|EVC_HUMAN	3
A0A0C4DGX4	tr|A0A0C4DGX4|A0A0C4DGX4_HUMAN;sp|Q13616|CUL1_HUMAN	3
P49189	sp|P49189|AL9A1_HUMAN	3
P30084	sp|P30084|ECHM_HUMAN	3
P20042	sp|P20042|IF2B_HUMAN	3
P07384	sp|P07384|CAN1_HUMAN	3
P27144	sp|P27144|KAD4_HUMAN;tr|D3DQ64|D3DQ64_HUMAN	3
P25788	sp|P25788|PSA3_HUMAN	3
E9PFR3	tr|E9PFR3|E9PFR3_HUMAN;sp|Q14738|2A5D_HUMAN;tr|H0Y8C4|H0Y8C4_HUMAN	3
Q15758	sp|Q15758|AAAT_HUMAN;tr|M0QXM4|M0QXM4_HUMAN	3
H0YN26	tr|H0YN26|H0YN26_HUMAN;sp|P39687|AN32A_HUMAN	3
Q14669	sp|Q14669|TRIPC_HUMAN	3
O00442	sp|O00442|RTCA_HUMAN	3
K7EP07	tr|K7EP07|K7EP07_HUMAN;tr|K7EK42|K7EK42_HUMAN;sp|Q99426|TBCB_HUMAN	3
Q96BP3	sp|Q96BP3|PPWD1_HUMAN;tr|F5H7P7|F5H7P7_HUMAN	3
Q9H2M9	sp|Q9H2M9|RBGPR_HUMAN	3
U3KPU7	tr|U3KPU7|U3KPU7_HUMAN;sp|O43826|G6PT1_HUMAN;tr|U3KQS2|U3KQS2_HUMAN	3
P00395	sp|P00395|COX1_HUMAN	3
Q9P0S9	sp|Q9P0S9|TM14C_HUMAN	3
H0YCR5	tr|H0YCR5|H0YCR5_HUMAN;sp|Q9BQC3|DPH2_HUMAN	3
H3BUW8	tr|H3BUW8|H3BUW8_HUMAN;sp|Q86WA8|LONP2_HUMAN	3
P02751	sp|P02751|FINC_HUMAN;tr|H0Y7Z1|H0Y7Z1_HUMAN	3
A0A2R8Y804	tr|A0A2R8Y804|A0A2R8Y804_HUMAN;tr|A0A2R8Y543|A0A2R8Y543_HUMAN;tr|A0A2R8YCH5|A0A2R8YCH5_HUMAN;sp|P35222|CTNB1_HUMAN;tr|A0A2R8Y5A3|A0A2R8Y5A3_HUMAN;tr|A0A2R8Y750|A0A2R8Y750_HUMAN;tr|B4DGU4|B4DGU4_HUMAN;tr|A0A2R8Y7Z0|A0A2R8Y7Z0_HUMAN;tr|A0A2R8Y5C3|A0A2R8Y5C3_HUMAN;tr|A0A2R8Y5Z1|A0A2R8Y5Z1_HUMAN;tr|A0A2R8Y6G0|A0A2R8Y6G0_HUMAN	3
A0A087WUT6	tr|A0A087WUT6|A0A087WUT6_HUMAN;sp|O60841|IF2P_HUMAN	3
P48444	sp|P48444|COPD_HUMAN;tr|B0YIW6|B0YIW6_HUMAN	3
M0QYT0	tr|M0QYT0|M0QYT0_HUMAN	3
A6NJA2	tr|A6NJA2|A6NJA2_HUMAN;sp|P54578|UBP14_HUMAN	3
Q13151	sp|Q13151|ROA0_HUMAN	3
Q9HD45	sp|Q9HD45|TM9S3_HUMAN;tr|Q5TB53|Q5TB53_HUMAN	3
P27338	sp|P27338|AOFB_HUMAN	3
E9PCB6	tr|E9PCB6|E9PCB6_HUMAN;sp|Q9BYT8|NEUL_HUMAN	3
Q8IXM3	sp|Q8IXM3|RM41_HUMAN	3
F8VWL0	tr|F8VWL0|F8VWL0_HUMAN;sp|Q12800|TFCP2_HUMAN	3
Q9HC52	sp|Q9HC52|CBX8_HUMAN;tr|B0QXZ6|B0QXZ6_HUMAN;sp|O95503|CBX6_HUMAN	3
P35998	sp|P35998|PRS7_HUMAN;tr|A0A1W2PQS1|A0A1W2PQS1_HUMAN	3
O60218	sp|O60218|AK1BA_HUMAN	3
G3V576	tr|G3V576|G3V576_HUMAN;tr|G3V4W0|G3V4W0_HUMAN;tr|B4DY08|B4DY08_HUMAN;tr|B2R5W2|B2R5W2_HUMAN;tr|G3V4C1|G3V4C1_HUMAN;tr|G3V2Q1|G3V2Q1_HUMAN;sp|P07910|HNRPC_HUMAN;tr|G3V555|G3V555_HUMAN;tr|G3V575|G3V575_HUMAN;tr|G3V5X6|G3V5X6_HUMAN;tr|G3V3K6|G3V3K6_HUMAN;tr|G3V251|G3V251_HUMAN;tr|B4DSU6|B4DSU6_HUMAN;tr|A0A0G2JNQ3|A0A0G2JNQ3_HUMAN;sp|B2RXH8|HNRC2_HUMAN	3
P61313	sp|P61313|RL15_HUMAN;tr|A0A2R8YEM3|A0A2R8YEM3_HUMAN;tr|E7EQV9|E7EQV9_HUMAN;tr|E7ENU7|E7ENU7_HUMAN;tr|E7EX53|E7EX53_HUMAN;tr|A0A2R8Y738|A0A2R8Y738_HUMAN	3
Q9Y277	sp|Q9Y277|VDAC3_HUMAN;tr|E5RFP6|E5RFP6_HUMAN;tr|E5RJN6|E5RJN6_HUMAN;tr|E5RHZ6|E5RHZ6_HUMAN	3
Q9H3P7	sp|Q9H3P7|GCP60_HUMAN	3
Q9Y570	sp|Q9Y570|PPME1_HUMAN	3
Q9Y2T2	sp|Q9Y2T2|AP3M1_HUMAN	3
Q9H0N0	sp|Q9H0N0|RAB6C_HUMAN;sp|Q53S08|RAB6D_HUMAN	3
Q92520	sp|Q92520|FAM3C_HUMAN;tr|C9JP35|C9JP35_HUMAN;tr|C9JMN4|C9JMN4_HUMAN	3
P01023	sp|P01023|A2MG_HUMAN	3
F5H365	tr|F5H365|F5H365_HUMAN;sp|Q15436|SC23A_HUMAN	3
P39019	sp|P39019|RS19_HUMAN;tr|M0R2L9|M0R2L9_HUMAN;tr|M0QXK4|M0QXK4_HUMAN;tr|M0QYF7|M0QYF7_HUMAN;tr|M0R140|M0R140_HUMAN	3
Q7Z406	sp|Q7Z406|MYH14_HUMAN;tr|M0QY43|M0QY43_HUMAN	3
K7EJL1	tr|K7EJL1|K7EJL1_HUMAN;sp|Q9BXS5|AP1M1_HUMAN;tr|E7ENJ6|E7ENJ6_HUMAN	3
P78417	sp|P78417|GSTO1_HUMAN;tr|Q5TA02|Q5TA02_HUMAN;tr|Q5TA01|Q5TA01_HUMAN	3
Q6NUQ4	sp|Q6NUQ4|TM214_HUMAN;tr|H7C0H8|H7C0H8_HUMAN	3
P62318	sp|P62318|SMD3_HUMAN;tr|H3BT13|H3BT13_HUMAN	3
Q9UBQ0	sp|Q9UBQ0|VPS29_HUMAN;tr|F8VXU5|F8VXU5_HUMAN	3
Q96EK6	sp|Q96EK6|GNA1_HUMAN;tr|G3V4W4|G3V4W4_HUMAN	3
P37108	sp|P37108|SRP14_HUMAN;tr|H0YLA2|H0YLA2_HUMAN	3
O43760	sp|O43760|SNG2_HUMAN;tr|K7ELD9|K7ELD9_HUMAN;tr|K7ENG9|K7ENG9_HUMAN;tr|K7ELS8|K7ELS8_HUMAN;tr|K7EJ35|K7EJ35_HUMAN	3
A0A2R8YEX5	tr|A0A2R8YEX5|A0A2R8YEX5_HUMAN;tr|A0A2R8Y359|A0A2R8Y359_HUMAN;tr|H7C532|H7C532_HUMAN;tr|A0A2R8Y5I5|A0A2R8Y5I5_HUMAN;tr|A0A2R8Y6H1|A0A2R8Y6H1_HUMAN;tr|A0A2R8YF57|A0A2R8YF57_HUMAN;sp|O00400|ACATN_HUMAN	3
Q9UHV9	sp|Q9UHV9|PFD2_HUMAN	3
A0A024RCR6	tr|A0A024RCR6|A0A024RCR6_HUMAN;tr|A0A0G2JK23|A0A0G2JK23_HUMAN;sp|P46379|BAG6_HUMAN;tr|A0A0G2JL47|A0A0G2JL47_HUMAN;tr|F6S6P2|F6S6P2_HUMAN;tr|X6REW1|X6REW1_HUMAN;tr|A0A0G2JJM1|A0A0G2JJM1_HUMAN	3
P30048	sp|P30048|PRDX3_HUMAN	3
Q5TEC6	tr|Q5TEC6|Q5TEC6_HUMAN	3
P51571	sp|P51571|SSRD_HUMAN;tr|A6NLM8|A6NLM8_HUMAN	3
P23588	sp|P23588|IF4B_HUMAN;tr|E7EX17|E7EX17_HUMAN	3
P62304	sp|P62304|RUXE_HUMAN;tr|A6NHK2|A6NHK2_HUMAN	3
Q5QPP4	tr|Q5QPP4|Q5QPP4_HUMAN;sp|Q14376|GALE_HUMAN;tr|Q5QPP9|Q5QPP9_HUMAN;tr|Q5QPP3|Q5QPP3_HUMAN	3
D6RD69	tr|D6RD69|D6RD69_HUMAN;sp|Q9Y6B6|SAR1B_HUMAN	3
F8W696	tr|F8W696|F8W696_HUMAN;sp|P02647|APOA1_HUMAN	3
F6RWC2	tr|F6RWC2|F6RWC2_HUMAN;tr|G3V4N6|G3V4N6_HUMAN;tr|G3V5T1|G3V5T1_HUMAN;tr|Q86TZ5|Q86TZ5_HUMAN;sp|Q9NRG7|D39U1_HUMAN	3
H3BRL3	tr|H3BRL3|H3BRL3_HUMAN;sp|O14562|UBFD1_HUMAN;tr|H3BUM8|H3BUM8_HUMAN	3
P82675	sp|P82675|RT05_HUMAN	3
E9PMI6	tr|E9PMI6|E9PMI6_HUMAN;tr|J3KN38|J3KN38_HUMAN;sp|P54105|ICLN_HUMAN	3
O60220	sp|O60220|TIM8A_HUMAN	3
Q15746	sp|Q15746|MYLK_HUMAN	3
Q96JH7	sp|Q96JH7|VCIP1_HUMAN	3
A0A2R8YD50	tr|A0A2R8YD50|A0A2R8YD50_HUMAN;sp|P51659|DHB4_HUMAN;tr|E7EWE5|E7EWE5_HUMAN;tr|E7ER27|E7ER27_HUMAN;tr|G5E9S2|G5E9S2_HUMAN;tr|E7ET17|E7ET17_HUMAN;tr|A0A2R8Y7L2|A0A2R8Y7L2_HUMAN	3
Q13155	sp|Q13155|AIMP2_HUMAN;tr|A8MU58|A8MU58_HUMAN	3
P61923	sp|P61923|COPZ1_HUMAN;tr|F8VVA7|F8VVA7_HUMAN;tr|F8W651|F8W651_HUMAN;tr|F8VYK5|F8VYK5_HUMAN;tr|F8VXB1|F8VXB1_HUMAN;tr|F8VUC5|F8VUC5_HUMAN;tr|F8W156|F8W156_HUMAN;tr|F8VYZ4|F8VYZ4_HUMAN	3
Q969X6	sp|Q969X6|UTP4_HUMAN;tr|H3BPD7|H3BPD7_HUMAN;tr|A0A0J9YXV4|A0A0J9YXV4_HUMAN;tr|A0A0J9YWM9|A0A0J9YWM9_HUMAN;tr|H3BSH7|H3BSH7_HUMAN	3
Q8NE01	sp|Q8NE01|CNNM3_HUMAN	3
Q14566	sp|Q14566|MCM6_HUMAN	3
Q9BXP5	sp|Q9BXP5|SRRT_HUMAN;tr|H7C3A1|H7C3A1_HUMAN	3
P16435	sp|P16435|NCPR_HUMAN;tr|E7EMD0|E7EMD0_HUMAN	3
G3V0I5	tr|G3V0I5|G3V0I5_HUMAN;sp|P49821|NDUV1_HUMAN;tr|B4DE93|B4DE93_HUMAN;tr|E9PQP1|E9PQP1_HUMAN	3
E7EQ72	tr|E7EQ72|E7EQ72_HUMAN;sp|Q15363|TMED2_HUMAN;tr|F5GX39|F5GX39_HUMAN	3
Q9BRQ8	sp|Q9BRQ8|AIFM2_HUMAN	3
A0A0B4J1R4	tr|A0A0B4J1R4|A0A0B4J1R4_HUMAN;sp|P32754|HPPD_HUMAN	3
P08133	sp|P08133|ANXA6_HUMAN;tr|E7EMC6|E7EMC6_HUMAN	3
Q99798	sp|Q99798|ACON_HUMAN;tr|A2A274|A2A274_HUMAN	3
C9JCJ5	tr|C9JCJ5|C9JCJ5_HUMAN;sp|Q15274|NADC_HUMAN	3
Q5JTJ3	sp|Q5JTJ3|COA6_HUMAN;tr|X6R5Z6|X6R5Z6_HUMAN	3
O95816	sp|O95816|BAG2_HUMAN	3
E5RHT6	tr|E5RHT6|E5RHT6_HUMAN;tr|F8W1U7|F8W1U7_HUMAN;tr|F8VWH9|F8VWH9_HUMAN;sp|Q8N6T3|ARFG1_HUMAN;tr|E5RHC5|E5RHC5_HUMAN	3
O94925	sp|O94925|GLSK_HUMAN;tr|H7BZD1|H7BZD1_HUMAN	3
Q9UI09	sp|Q9UI09|NDUAC_HUMAN;tr|F8VXI1|F8VXI1_HUMAN;tr|F8VRD8|F8VRD8_HUMAN	3
Q9GZZ9	sp|Q9GZZ9|UBA5_HUMAN;tr|E7EQ61|E7EQ61_HUMAN;tr|E7EWE1|E7EWE1_HUMAN	3
Q06203	sp|Q06203|PUR1_HUMAN;tr|D6RCC8|D6RCC8_HUMAN	3
P62424	sp|P62424|RL7A_HUMAN;tr|Q5T8U2|Q5T8U2_HUMAN;tr|Q5T8U3|Q5T8U3_HUMAN	3
Q5QPE2	tr|Q5QPE2|Q5QPE2_HUMAN;tr|A0A2R8YFH5|A0A2R8YFH5_HUMAN;sp|Q15437|SC23B_HUMAN	3
Q9H8Y8	sp|Q9H8Y8|GORS2_HUMAN	3
Q9Y5M8	sp|Q9Y5M8|SRPRB_HUMAN;tr|H7C4H2|H7C4H2_HUMAN	3
Q01081	sp|Q01081|U2AF1_HUMAN;sp|P0DN76|U2AF5_HUMAN;sp|Q8WU68|U2AF4_HUMAN	3
Q16719	sp|Q16719|KYNU_HUMAN	3
Q15904	sp|Q15904|VAS1_HUMAN;tr|A6QRJ1|A6QRJ1_HUMAN;tr|A0A0C4DGX8|A0A0C4DGX8_HUMAN	3
P15291	sp|P15291|B4GT1_HUMAN;tr|Q86XA6|Q86XA6_HUMAN	3
J3KTF8	tr|J3KTF8|J3KTF8_HUMAN;sp|P52565|GDIR1_HUMAN;tr|J3QQX2|J3QQX2_HUMAN;tr|J3KRE2|J3KRE2_HUMAN;tr|J3KRY1|J3KRY1_HUMAN	3
D6RGI3	tr|D6RGI3|D6RGI3_HUMAN;sp|Q9NVA2|SEP11_HUMAN;tr|D6RER5|D6RER5_HUMAN	3
Q9UHB9	sp|Q9UHB9|SRP68_HUMAN	3
P07602	sp|P07602|SAP_HUMAN;tr|C9JIZ6|C9JIZ6_HUMAN;tr|A0A0J9YXB8|A0A0J9YXB8_HUMAN;tr|Q5BJH1|Q5BJH1_HUMAN	3
Q6DKI1	sp|Q6DKI1|RL7L_HUMAN;tr|R4GMU7|R4GMU7_HUMAN	3
P11498	sp|P11498|PYC_HUMAN	4
Q14974	sp|Q14974|IMB1_HUMAN;tr|J3KTM9|J3KTM9_HUMAN	4
P49257	sp|P49257|LMAN1_HUMAN	4
E7ETU9	tr|E7ETU9|E7ETU9_HUMAN;sp|O00469|PLOD2_HUMAN	4
E7EX90	tr|E7EX90|E7EX90_HUMAN;sp|Q14203|DCTN1_HUMAN;tr|E7EWF7|E7EWF7_HUMAN	4
O75746	sp|O75746|CMC1_HUMAN	4
P20674	sp|P20674|COX5A_HUMAN;tr|H3BRM5|H3BRM5_HUMAN;tr|H3BV69|H3BV69_HUMAN;tr|H3BNX8|H3BNX8_HUMAN	4
H0Y5T1	tr|H0Y5T1|H0Y5T1_HUMAN;tr|F8WA11|F8WA11_HUMAN;sp|Q7Z460|CLAP1_HUMAN	4
E5RFX7	tr|E5RFX7|E5RFX7_HUMAN;tr|E5RG77|E5RG77_HUMAN;sp|O94903|PLPHP_HUMAN;tr|H0YBG2|H0YBG2_HUMAN	4
Q53HI1	sp|Q53HI1|UNC50_HUMAN;tr|J3KQ47|J3KQ47_HUMAN	4
S4R3M9	tr|S4R3M9|S4R3M9_HUMAN;sp|O75764|TCEA3_HUMAN	4
F8VPD4	tr|F8VPD4|F8VPD4_HUMAN;sp|P27708|PYR1_HUMAN	4
Q92973	sp|Q92973|TNPO1_HUMAN	4
Q9Y230	sp|Q9Y230|RUVB2_HUMAN;tr|X6R2L4|X6R2L4_HUMAN;tr|M0R0Y3|M0R0Y3_HUMAN	4
F8W7U8	tr|F8W7U8|F8W7U8_HUMAN;sp|P49959|MRE11_HUMAN	4
Q9Y2Z0	sp|Q9Y2Z0|SGT1_HUMAN	4
Q9BPW8	sp|Q9BPW8|NIPS1_HUMAN;tr|H7C2U6|H7C2U6_HUMAN	4
Q9P2I0	sp|Q9P2I0|CPSF2_HUMAN	4
Q15392	sp|Q15392|DHC24_HUMAN;tr|A0A0A0MTI1|A0A0A0MTI1_HUMAN;tr|H7C4B7|H7C4B7_HUMAN	4
O00186	sp|O00186|STXB3_HUMAN	4
P29083	sp|P29083|T2EA_HUMAN;tr|C9J329|C9J329_HUMAN;tr|E9PER7|E9PER7_HUMAN;tr|C9IYL4|C9IYL4_HUMAN	4
P40926	sp|P40926|MDHM_HUMAN;tr|G3XAL0|G3XAL0_HUMAN	4
K7ELL7	tr|K7ELL7|K7ELL7_HUMAN;sp|P14314|GLU2B_HUMAN	4
O76031	sp|O76031|CLPX_HUMAN	4
P29144	sp|P29144|TPP2_HUMAN;tr|Q5VZU9|Q5VZU9_HUMAN	4
F8W1A4	tr|F8W1A4|F8W1A4_HUMAN;sp|P54819|KAD2_HUMAN;tr|F8VZG5|F8VZG5_HUMAN;tr|G3V213|G3V213_HUMAN;tr|F8VY04|F8VY04_HUMAN	4
Q9H0U4	sp|Q9H0U4|RAB1B_HUMAN;tr|E9PLD0|E9PLD0_HUMAN	4
Q8NCN5	sp|Q8NCN5|PDPR_HUMAN;tr|A8MT40|A8MT40_HUMAN;tr|H3BQG3|H3BQG3_HUMAN	4
Q07960	sp|Q07960|RHG01_HUMAN	4
E5RHG8	tr|E5RHG8|E5RHG8_HUMAN;sp|Q15369|ELOC_HUMAN;tr|R4GMY8|R4GMY8_HUMAN	4
Q12824	sp|Q12824|SNF5_HUMAN;tr|G5E975|G5E975_HUMAN;tr|A0A2R8YEE8|A0A2R8YEE8_HUMAN;tr|A0A0G2JSE9|A0A0G2JSE9_HUMAN;tr|C9JTA6|C9JTA6_HUMAN;tr|A0A2R8Y5N5|A0A2R8Y5N5_HUMAN;tr|A0A0G2JRV3|A0A0G2JRV3_HUMAN	4
A0A0G2JS82	tr|A0A0G2JS82|A0A0G2JS82_HUMAN;sp|O94973|AP2A2_HUMAN	4
H7C1W2	tr|H7C1W2|H7C1W2_HUMAN;tr|E9PF84|E9PF84_HUMAN;tr|G5E9Q7|G5E9Q7_HUMAN;tr|E7EQB8|E7EQB8_HUMAN;sp|P51553|IDH3G_HUMAN	4
O15067	sp|O15067|PUR4_HUMAN	4
P17301	sp|P17301|ITA2_HUMAN;tr|E7EMF1|E7EMF1_HUMAN;tr|E7ESP4|E7ESP4_HUMAN;tr|E9PB77|E9PB77_HUMAN	4
P10253	sp|P10253|LYAG_HUMAN	4
O00764	sp|O00764|PDXK_HUMAN;tr|F2Z2Y4|F2Z2Y4_HUMAN	4
P50552	sp|P50552|VASP_HUMAN;tr|K7EM16|K7EM16_HUMAN	4
P53384	sp|P53384|NUBP1_HUMAN;tr|I3L531|I3L531_HUMAN	4
A6NGP5	tr|A6NGP5|A6NGP5_HUMAN;tr|H3BMV3|H3BMV3_HUMAN;sp|Q9H910|JUPI2_HUMAN;tr|H3BMM8|H3BMM8_HUMAN;tr|B4E1P3|B4E1P3_HUMAN;tr|H3BMT0|H3BMT0_HUMAN;tr|H3BTV5|H3BTV5_HUMAN;tr|H3BU16|H3BU16_HUMAN	4
G5EA06	tr|G5EA06|G5EA06_HUMAN;sp|Q92552|RT27_HUMAN;tr|D6RH20|D6RH20_HUMAN	4
O95456	sp|O95456|PSMG1_HUMAN;tr|F8WBH7|F8WBH7_HUMAN	4
Q66K74	sp|Q66K74|MAP1S_HUMAN	4
X6R631	tr|X6R631|X6R631_HUMAN;sp|Q7Z7F7|RM55_HUMAN	4
Q5SNT2	sp|Q5SNT2|TM201_HUMAN	4
O95202	sp|O95202|LETM1_HUMAN	4
P35237	sp|P35237|SPB6_HUMAN;tr|A0A024QZX5|A0A024QZX5_HUMAN;tr|A0A087X1N8|A0A087X1N8_HUMAN;tr|A0A2R8YD12|A0A2R8YD12_HUMAN;tr|A0A2R8Y6A7|A0A2R8Y6A7_HUMAN	4
Q9H3G5	sp|Q9H3G5|CPVL_HUMAN;tr|H7C0X5|H7C0X5_HUMAN	4
G3V1J5	tr|G3V1J5|G3V1J5_HUMAN;sp|Q9Y2L1|RRP44_HUMAN;tr|F2Z2C0|F2Z2C0_HUMAN	4
P31350	sp|P31350|RIR2_HUMAN;tr|A0A286YFD6|A0A286YFD6_HUMAN;tr|C9JXC1|C9JXC1_HUMAN	4
P61026	sp|P61026|RAB10_HUMAN;sp|P51153|RAB13_HUMAN	4
Q7L2H7	sp|Q7L2H7|EIF3M_HUMAN	4
B7ZKQ9	tr|B7ZKQ9|B7ZKQ9_HUMAN;sp|Q8WTV0|SCRB1_HUMAN	4
E5RFP0	tr|E5RFP0|E5RFP0_HUMAN;sp|Q8WVJ2|NUDC2_HUMAN	4
Q9UNE7	sp|Q9UNE7|CHIP_HUMAN;tr|H3BTA3|H3BTA3_HUMAN;tr|H3BUD0|H3BUD0_HUMAN;tr|H3BS86|H3BS86_HUMAN	4
Q9H4A6	sp|Q9H4A6|GOLP3_HUMAN	4
A0A087WV57	tr|A0A087WV57|A0A087WV57_HUMAN;tr|A0A087WYS3|A0A087WYS3_HUMAN;tr|H7C4X9|H7C4X9_HUMAN;tr|A0A087WVZ6|A0A087WVZ6_HUMAN;sp|Q9ULU4|PKCB1_HUMAN	4
Q9Y490	sp|Q9Y490|TLN1_HUMAN	4
Q14690	sp|Q14690|RRP5_HUMAN;tr|A0A3B3IUD7|A0A3B3IUD7_HUMAN	4
O76003	sp|O76003|GLRX3_HUMAN	4
Q15050	sp|Q15050|RRS1_HUMAN	4
Q5QNZ2	tr|Q5QNZ2|Q5QNZ2_HUMAN;sp|P24539|AT5F1_HUMAN	4
Q9NZJ7	sp|Q9NZJ7|MTCH1_HUMAN;tr|H0Y8C3|H0Y8C3_HUMAN	4
Q9BVC6	sp|Q9BVC6|TM109_HUMAN	4
P02545	sp|P02545|LMNA_HUMAN;tr|Q3BDU5|Q3BDU5_HUMAN;tr|Q5TCI8|Q5TCI8_HUMAN	4
Q15149	sp|Q15149|PLEC_HUMAN;tr|H0YDN1|H0YDN1_HUMAN	4
Q99497	sp|Q99497|PARK7_HUMAN;tr|K7ELW0|K7ELW0_HUMAN	4
P00738	sp|P00738|HPT_HUMAN;tr|A0A087WU08|A0A087WU08_HUMAN;tr|A0A0C4DGL8|A0A0C4DGL8_HUMAN;tr|J3QLC9|J3QLC9_HUMAN;tr|J3QR68|J3QR68_HUMAN;tr|H0Y300|H0Y300_HUMAN;tr|H3BS21|H3BS21_HUMAN	4
P22413	sp|P22413|ENPP1_HUMAN	4
Q01085	sp|Q01085|TIAR_HUMAN;tr|E7ETC0|E7ETC0_HUMAN	4
P30740	sp|P30740|ILEU_HUMAN	4
F8VQQ3	tr|F8VQQ3|F8VQQ3_HUMAN;sp|Q9HB07|MYG1_HUMAN;tr|F8VR84|F8VR84_HUMAN	4
O75937	sp|O75937|DNJC8_HUMAN	4
A0A3B3ISN2	tr|A0A3B3ISN2|A0A3B3ISN2_HUMAN;tr|A0A2R8Y640|A0A2R8Y640_HUMAN;tr|A0A2R8YHB3|A0A2R8YHB3_HUMAN;tr|A0A1B0GUB2|A0A1B0GUB2_HUMAN;tr|A0A3B3IRP5|A0A3B3IRP5_HUMAN;sp|Q6P1J9|CDC73_HUMAN	4
Q92604	sp|Q92604|LGAT1_HUMAN	4
Q9NYU2	sp|Q9NYU2|UGGG1_HUMAN	4
E9PM69	tr|E9PM69|E9PM69_HUMAN;sp|P17980|PRS6A_HUMAN	4
E7EQR4	tr|E7EQR4|E7EQR4_HUMAN;sp|P15311|EZRI_HUMAN;sp|P26038|MOES_HUMAN	4
P14923	sp|P14923|PLAK_HUMAN	4
O43399	sp|O43399|TPD54_HUMAN;tr|A0A087WYR3|A0A087WYR3_HUMAN;tr|A0A087WZ51|A0A087WZ51_HUMAN	4
G5E9W7	tr|G5E9W7|G5E9W7_HUMAN;tr|G5E9V5|G5E9V5_HUMAN;sp|P82650|RT22_HUMAN;tr|H7C5F2|H7C5F2_HUMAN;tr|H7C5H3|H7C5H3_HUMAN	4
Q9BR76	sp|Q9BR76|COR1B_HUMAN;tr|A0A087WW53|A0A087WW53_HUMAN;tr|F5H390|F5H390_HUMAN	4
Q9UPN3	sp|Q9UPN3|MACF1_HUMAN;tr|H3BPE1|H3BPE1_HUMAN;tr|H3BQK9|H3BQK9_HUMAN;tr|H0Y390|H0Y390_HUMAN	4
O14617	sp|O14617|AP3D1_HUMAN;tr|A0A2R8Y4J3|A0A2R8Y4J3_HUMAN	4
Q5T6V5	sp|Q5T6V5|QSPP_HUMAN	4
Q9H3K6	sp|Q9H3K6|BOLA2_HUMAN;tr|A0A087WZT3|A0A087WZT3_HUMAN	4
Q8IWZ3	sp|Q8IWZ3|ANKH1_HUMAN;tr|E9PDP5|E9PDP5_HUMAN	4
P30101	sp|P30101|PDIA3_HUMAN	4
P10155	sp|P10155|RO60_HUMAN;tr|D6RDN1|D6RDN1_HUMAN;tr|D6RE09|D6RE09_HUMAN	4
Q96IJ6	sp|Q96IJ6|GMPPA_HUMAN;tr|A0A0U1RRC2|A0A0U1RRC2_HUMAN;tr|A0A087WUI8|A0A087WUI8_HUMAN	4
P00403	sp|P00403|COX2_HUMAN	4
O14745	sp|O14745|NHRF1_HUMAN;tr|J3QRP6|J3QRP6_HUMAN	4
Q8TEX9	sp|Q8TEX9|IPO4_HUMAN;tr|H0YN14|H0YN14_HUMAN	4
Q02809	sp|Q02809|PLOD1_HUMAN	4
Q8NBJ5	sp|Q8NBJ5|GT251_HUMAN	4
C9IZ01	tr|C9IZ01|C9IZ01_HUMAN;sp|Q96RP9|EFGM_HUMAN;tr|F8WAU4|F8WAU4_HUMAN	4
Q9ULW3	sp|Q9ULW3|ABT1_HUMAN	4
C9JTS3	tr|C9JTS3|C9JTS3_HUMAN;tr|C9JG97|C9JG97_HUMAN;sp|Q13685|AAMP_HUMAN;tr|C9JEH3|C9JEH3_HUMAN	4
Q14139	sp|Q14139|UBE4A_HUMAN	4
Q9Y6A9	sp|Q9Y6A9|SPCS1_HUMAN	4
P31150	sp|P31150|GDIA_HUMAN	4
I3L2B0	tr|I3L2B0|I3L2B0_HUMAN;tr|K7EIG1|K7EIG1_HUMAN;sp|O75153|CLU_HUMAN	4
G3V1U3	tr|G3V1U3|G3V1U3_HUMAN;tr|F8VRR3|F8VRR3_HUMAN;tr|F8VQZ7|F8VQZ7_HUMAN;sp|P50579|MAP2_HUMAN;tr|F8VY03|F8VY03_HUMAN;tr|F8VSC4|F8VSC4_HUMAN;tr|F8VZX9|F8VZX9_HUMAN	4
Q9BQ69	sp|Q9BQ69|MACD1_HUMAN	4
Q5T6F2	sp|Q5T6F2|UBAP2_HUMAN	4
O95870	sp|O95870|ABHGA_HUMAN;tr|A0A0G2JJD3|A0A0G2JJD3_HUMAN;tr|F2Z3G6|F2Z3G6_HUMAN;tr|F2Z3H2|F2Z3H2_HUMAN;tr|A0A0G2JI89|A0A0G2JI89_HUMAN	4
P62273	sp|P62273|RS29_HUMAN;tr|A0A087WTT6|A0A087WTT6_HUMAN;tr|A0A2R8Y851|A0A2R8Y851_HUMAN	4
Q14204	sp|Q14204|DYHC1_HUMAN	4
Q99797	sp|Q99797|MIPEP_HUMAN	4
Q9HB66	tr|Q9HB66|Q9HB66_HUMAN	4
K7EKF3	tr|K7EKF3|K7EKF3_HUMAN;tr|E7EVE9|E7EVE9_HUMAN;tr|A8MX75|A8MX75_HUMAN;sp|P18074|ERCC2_HUMAN	4
Q16222	sp|Q16222|UAP1_HUMAN	4
P50454	sp|P50454|SERPH_HUMAN;tr|E9PPV6|E9PPV6_HUMAN;tr|E9PR70|E9PR70_HUMAN;tr|E9PKH2|E9PKH2_HUMAN;tr|E9PNX1|E9PNX1_HUMAN;tr|E9PK86|E9PK86_HUMAN;tr|E9PMI5|E9PMI5_HUMAN	4
B7Z6D5	tr|B7Z6D5|B7Z6D5_HUMAN;sp|Q96GQ7|DDX27_HUMAN	4
P43246	sp|P43246|MSH2_HUMAN;tr|A0A2R8Y7S8|A0A2R8Y7S8_HUMAN;tr|A0A2R8YFH0|A0A2R8YFH0_HUMAN;tr|E9PHA6|E9PHA6_HUMAN;tr|A0A2R8Y6P0|A0A2R8Y6P0_HUMAN;tr|A0A2R8YG02|A0A2R8YG02_HUMAN	4
Q96A35	sp|Q96A35|RM24_HUMAN;tr|X6RJ73|X6RJ73_HUMAN	4
A0MZ66	sp|A0MZ66|SHOT1_HUMAN	4
Q9Y383	sp|Q9Y383|LC7L2_HUMAN;tr|A0A0A6YYJ8|A0A0A6YYJ8_HUMAN	4
P07814	sp|P07814|SYEP_HUMAN;tr|V9GYZ6|V9GYZ6_HUMAN	4
Q16555	sp|Q16555|DPYL2_HUMAN;tr|A0A1C7CYX9|A0A1C7CYX9_HUMAN	4
Q9Y3Z3	sp|Q9Y3Z3|SAMH1_HUMAN;tr|A0A2R8YCS7|A0A2R8YCS7_HUMAN;tr|A0A2R8YD90|A0A2R8YD90_HUMAN	4
Q9UNF0	sp|Q9UNF0|PACN2_HUMAN;tr|A0A0U1RR22|A0A0U1RR22_HUMAN	4
A0A087WXM6	tr|A0A087WXM6|A0A087WXM6_HUMAN;tr|J3QQT2|J3QQT2_HUMAN;tr|J3KRX5|J3KRX5_HUMAN;sp|P18621|RL17_HUMAN;tr|A0A0A6YYL6|A0A0A6YYL6_HUMAN;tr|J3QLC8|J3QLC8_HUMAN;tr|A0A0A0MRF8|A0A0A0MRF8_HUMAN;tr|A0A087WY81|A0A087WY81_HUMAN;tr|J3KRB3|J3KRB3_HUMAN;tr|A0A087WWH0|A0A087WWH0_HUMAN;tr|J3QS96|J3QS96_HUMAN	4
Q9BTX1	sp|Q9BTX1|NDC1_HUMAN	4
E7EM64	tr|E7EM64|E7EM64_HUMAN;sp|Q7L5N1|CSN6_HUMAN;tr|H7C3T0|H7C3T0_HUMAN	4
Q562R1	sp|Q562R1|ACTBL_HUMAN	4
Q9UBT2	sp|Q9UBT2|SAE2_HUMAN;tr|K7EPL2|K7EPL2_HUMAN	4
O96019	sp|O96019|ACL6A_HUMAN	4
Q8TAQ2	sp|Q8TAQ2|SMRC2_HUMAN;tr|F8VXC8|F8VXC8_HUMAN	4
Q15008	sp|Q15008|PSMD6_HUMAN;tr|C9J7B7|C9J7B7_HUMAN	4
Q92616	sp|Q92616|GCN1_HUMAN	4
Q7KZF4	sp|Q7KZF4|SND1_HUMAN	4
P41252	sp|P41252|SYIC_HUMAN;tr|J3KR24|J3KR24_HUMAN;tr|A0A0A0MSX9|A0A0A0MSX9_HUMAN	4
Q13596	sp|Q13596|SNX1_HUMAN;tr|H0YK42|H0YK42_HUMAN	4
F5H6E2	tr|F5H6E2|F5H6E2_HUMAN;sp|O00159|MYO1C_HUMAN	4
R4GMT0	tr|R4GMT0|R4GMT0_HUMAN;sp|P61163|ACTZ_HUMAN;tr|A0A1B0GVS3|A0A1B0GVS3_HUMAN	4
Q9Y6Y8	sp|Q9Y6Y8|S23IP_HUMAN	4
P51665	sp|P51665|PSMD7_HUMAN	4
Q9NPH2	sp|Q9NPH2|INO1_HUMAN;tr|J3QS51|J3QS51_HUMAN	4
P55735	sp|P55735|SEC13_HUMAN;tr|A8MXL6|A8MXL6_HUMAN	4
Q9Y446	sp|Q9Y446|PKP3_HUMAN;tr|E9PKC4|E9PKC4_HUMAN;tr|E9PQ15|E9PQ15_HUMAN	4
Q9UM22	sp|Q9UM22|EPDR1_HUMAN	4
P17568	sp|P17568|NDUB7_HUMAN	4
O94855	sp|O94855|SC24D_HUMAN;tr|E9PDM8|E9PDM8_HUMAN	4
A0A087WXS7	tr|A0A087WXS7|A0A087WXS7_HUMAN;sp|O43681|ASNA_HUMAN;tr|K7ERW9|K7ERW9_HUMAN	4
Q9H2P0	sp|Q9H2P0|ADNP_HUMAN;tr|E9PQK8|E9PQK8_HUMAN;tr|A0A2R8Y6X0|A0A2R8Y6X0_HUMAN	4
P61106	sp|P61106|RAB14_HUMAN;tr|X6RFL8|X6RFL8_HUMAN	4
P63173	sp|P63173|RL38_HUMAN	4
E5RGS4	tr|E5RGS4|E5RGS4_HUMAN;sp|O60925|PFD1_HUMAN	4
O15523	sp|O15523|DDX3Y_HUMAN	4
O75439	sp|O75439|MPPB_HUMAN;tr|G3V0E4|G3V0E4_HUMAN	4
P46776	sp|P46776|RL27A_HUMAN;tr|E9PLL6|E9PLL6_HUMAN;tr|E9PJD9|E9PJD9_HUMAN;tr|E9PLX7|E9PLX7_HUMAN	4
P62877	sp|P62877|RBX1_HUMAN	4
P04792	sp|P04792|HSPB1_HUMAN;tr|F8WE04|F8WE04_HUMAN	4
Q07065	sp|Q07065|CKAP4_HUMAN	4
Q9Y6N5	sp|Q9Y6N5|SQOR_HUMAN;tr|H3BNX3|H3BNX3_HUMAN	4
Q02318	sp|Q02318|CP27A_HUMAN	4
P00374	sp|P00374|DYR_HUMAN;tr|B4DM58|B4DM58_HUMAN	4
Q9HC07	sp|Q9HC07|TM165_HUMAN;tr|V9GY93|V9GY93_HUMAN	4
P52564	sp|P52564|MP2K6_HUMAN	4
Q8NC60	sp|Q8NC60|NOA1_HUMAN	4
P60709	sp|P60709|ACTB_HUMAN	4
Q13011	sp|Q13011|ECH1_HUMAN;tr|M0R248|M0R248_HUMAN	4
P55036	sp|P55036|PSMD4_HUMAN;tr|Q5VWC4|Q5VWC4_HUMAN;tr|A6PVX3|A6PVX3_HUMAN	4
Q9Y305	sp|Q9Y305|ACOT9_HUMAN;tr|H7C5Q2|H7C5Q2_HUMAN	4
P67870	sp|P67870|CSK2B_HUMAN;tr|Q5SRQ6|Q5SRQ6_HUMAN;tr|Q5SRQ3|Q5SRQ3_HUMAN	4
P28072	sp|P28072|PSB6_HUMAN;tr|I3L3X7|I3L3X7_HUMAN;tr|A0A087X2I4|A0A087X2I4_HUMAN	4
Q14696	sp|Q14696|MESD_HUMAN	4
A0A0C4DGG1	tr|A0A0C4DGG1|A0A0C4DGG1_HUMAN;sp|Q9UKS6|PACN3_HUMAN;tr|E9PIY1|E9PIY1_HUMAN	4
B8ZZZ0	tr|B8ZZZ0|B8ZZZ0_HUMAN;sp|Q6NVY1|HIBCH_HUMAN;tr|H7BYI7|H7BYI7_HUMAN	4
P46734	sp|P46734|MP2K3_HUMAN;tr|J3KRV4|J3KRV4_HUMAN;tr|J3QR49|J3QR49_HUMAN	4
P47914	sp|P47914|RL29_HUMAN;tr|A0A3B3ITT5|A0A3B3ITT5_HUMAN	4
Q7L576	sp|Q7L576|CYFP1_HUMAN;tr|H7C229|H7C229_HUMAN;tr|E7EVJ5|E7EVJ5_HUMAN;tr|A0A0G2JR96|A0A0G2JR96_HUMAN;tr|A0A0G2JQT1|A0A0G2JQT1_HUMAN;tr|E7EW33|E7EW33_HUMAN;sp|Q96F07|CYFP2_HUMAN	4
I3L1R7	tr|I3L1R7|I3L1R7_HUMAN;sp|Q99447|PCY2_HUMAN;tr|I3L2Q1|I3L2Q1_HUMAN;tr|I3L1L9|I3L1L9_HUMAN;tr|I3L3V9|I3L3V9_HUMAN	4
K7EM56	tr|K7EM56|K7EM56_HUMAN;tr|A0A0B4J2B4|A0A0B4J2B4_HUMAN;tr|S4R417|S4R417_HUMAN;tr|K7EQJ5|K7EQJ5_HUMAN;sp|P62841|RS15_HUMAN;tr|K7ELC2|K7ELC2_HUMAN;tr|S4R456|S4R456_HUMAN;tr|K7EJ78|K7EJ78_HUMAN	4
Q96N67	sp|Q96N67|DOCK7_HUMAN;tr|A0A1B0GUE9|A0A1B0GUE9_HUMAN	4
Q9NRF9	sp|Q9NRF9|DPOE3_HUMAN	4
F2Z3H0	tr|F2Z3H0|F2Z3H0_HUMAN;tr|F2Z3N9|F2Z3N9_HUMAN;sp|Q99543|DNJC2_HUMAN	4
P40763	sp|P40763|STAT3_HUMAN;tr|G8JLH9|G8JLH9_HUMAN	4
Q9UMX0	sp|Q9UMX0|UBQL1_HUMAN	4
A0A087WUN7	tr|A0A087WUN7|A0A087WUN7_HUMAN;tr|H0YJ40|H0YJ40_HUMAN;tr|G3V4X6|G3V4X6_HUMAN;sp|Q9GZT3|SLIRP_HUMAN;tr|G3V2S9|G3V2S9_HUMAN;tr|H0YJW7|H0YJW7_HUMAN;tr|H0YJ07|H0YJ07_HUMAN;tr|H0YJU7|H0YJU7_HUMAN	4
Q9Y6M9	sp|Q9Y6M9|NDUB9_HUMAN;tr|A0A3B3IT57|A0A3B3IT57_HUMAN;tr|E9PH64|E9PH64_HUMAN;tr|E7EWZ0|E7EWZ0_HUMAN;tr|E9PF49|E9PF49_HUMAN	4
A0A3B3IRQ7	tr|A0A3B3IRQ7|A0A3B3IRQ7_HUMAN;sp|P30533|AMRP_HUMAN	4
Q5W011	tr|Q5W011|Q5W011_HUMAN;tr|Q5W010|Q5W010_HUMAN;sp|Q96I25|SPF45_HUMAN	4
B1AHA8	tr|B1AHA8|B1AHA8_HUMAN;sp|P09601|HMOX1_HUMAN	4
Q9NVS2	sp|Q9NVS2|RT18A_HUMAN;tr|Q5QPA5|Q5QPA5_HUMAN	4
K7EM02	tr|K7EM02|K7EM02_HUMAN;tr|K7EIJ8|K7EIJ8_HUMAN;sp|Q8IYT4|KATL2_HUMAN	4
Q01469	sp|Q01469|FABP5_HUMAN;tr|I6L8B7|I6L8B7_HUMAN	4
B5MCF9	tr|B5MCF9|B5MCF9_HUMAN;sp|O00541|PESC_HUMAN;tr|B3KXD6|B3KXD6_HUMAN	4
P21589	sp|P21589|5NTD_HUMAN;tr|Q96B60|Q96B60_HUMAN	4
E9PKG6	tr|E9PKG6|E9PKG6_HUMAN;tr|A0A087WSV8|A0A087WSV8_HUMAN;sp|P80303|NUCB2_HUMAN;tr|Q2L696|Q2L696_HUMAN	4
F8VUA2	tr|F8VUA2|F8VUA2_HUMAN;tr|F8VVT7|F8VVT7_HUMAN;sp|Q9HD42|CHM1A_HUMAN	4
Q10570	sp|Q10570|CPSF1_HUMAN	4
Q92696	sp|Q92696|PGTA_HUMAN;tr|H0YLH3|H0YLH3_HUMAN	4
O14579	sp|O14579|COPE_HUMAN;tr|M0QXB4|M0QXB4_HUMAN	4
E9PN17	tr|E9PN17|E9PN17_HUMAN;tr|A0A3B3ITX4|A0A3B3ITX4_HUMAN;sp|O75964|ATP5L_HUMAN	4
P08754	sp|P08754|GNAI3_HUMAN;sp|P63096|GNAI1_HUMAN	4
O00629	sp|O00629|IMA3_HUMAN;tr|H7C4F6|H7C4F6_HUMAN	4
P48449	sp|P48449|ERG7_HUMAN;tr|C9J315|C9J315_HUMAN;tr|A0A0G2JQD0|A0A0G2JQD0_HUMAN	4
Q9UMS0	sp|Q9UMS0|NFU1_HUMAN	4
P09669	sp|P09669|COX6C_HUMAN	4
Q09666	sp|Q09666|AHNK_HUMAN	4
P11387	sp|P11387|TOP1_HUMAN	4
Q15075	sp|Q15075|EEA1_HUMAN	4
O95782	sp|O95782|AP2A1_HUMAN	4
Q86U38	sp|Q86U38|NOP9_HUMAN;tr|A0A3B3ISH6|A0A3B3ISH6_HUMAN	4
Q86U42	sp|Q86U42|PABP2_HUMAN;tr|B4DEH8|B4DEH8_HUMAN;tr|G3V4T2|G3V4T2_HUMAN	4
M0QY25	tr|M0QY25|M0QY25_HUMAN;sp|Q86YD1|PTOV1_HUMAN;tr|M0QZB9|M0QZB9_HUMAN;tr|M0QYQ4|M0QYQ4_HUMAN;tr|M0QYH7|M0QYH7_HUMAN;tr|A0A0C4DGR2|A0A0C4DGR2_HUMAN	4
O95470	sp|O95470|SGPL1_HUMAN	4
Q5QPM7	tr|Q5QPM7|Q5QPM7_HUMAN;sp|Q92530|PSMF1_HUMAN;tr|H0Y555|H0Y555_HUMAN;tr|F5H4Z3|F5H4Z3_HUMAN;tr|Q5QPM9|Q5QPM9_HUMAN	4
Q14789	sp|Q14789|GOGB1_HUMAN	4
O95881	sp|O95881|TXD12_HUMAN	4
P62906	sp|P62906|RL10A_HUMAN	4
O60664	sp|O60664|PLIN3_HUMAN;tr|K7EL96|K7EL96_HUMAN;tr|K7ERZ3|K7ERZ3_HUMAN	4
Q02790	sp|Q02790|FKBP4_HUMAN	4
Q9ULV4	sp|Q9ULV4|COR1C_HUMAN;tr|B4E3S0|B4E3S0_HUMAN	4
E5RJ47	tr|E5RJ47|E5RJ47_HUMAN;tr|E5RH18|E5RH18_HUMAN;sp|O15116|LSM1_HUMAN	4
Q02127	sp|Q02127|PYRD_HUMAN;tr|I3NI32|I3NI32_HUMAN	4
P04075	sp|P04075|ALDOA_HUMAN;tr|J3KPS3|J3KPS3_HUMAN;tr|H3BQN4|H3BQN4_HUMAN;tr|H3BPS8|H3BPS8_HUMAN;tr|H3BUH7|H3BUH7_HUMAN	4
O95373	sp|O95373|IPO7_HUMAN	4
E3W994	tr|E3W994|E3W994_HUMAN;tr|J3KR49|J3KR49_HUMAN;sp|O75122|CLAP2_HUMAN;tr|A0A0U1RQI6|A0A0U1RQI6_HUMAN;tr|E7ERI8|E7ERI8_HUMAN;tr|E7EW49|E7EW49_HUMAN	4
Q9BVG4	sp|Q9BVG4|PBDC1_HUMAN;tr|A6NDF3|A6NDF3_HUMAN	4
Q9HBH1	sp|Q9HBH1|DEFM_HUMAN	4
Q96EL3	sp|Q96EL3|RM53_HUMAN;tr|B9A051|B9A051_HUMAN	4
Q9UI12	sp|Q9UI12|VATH_HUMAN;tr|E5RK31|E5RK31_HUMAN;tr|E5RJG1|E5RJG1_HUMAN;tr|E5RG49|E5RG49_HUMAN;tr|E5RHH0|E5RHH0_HUMAN;tr|G3V126|G3V126_HUMAN	4
O00154	sp|O00154|BACH_HUMAN;tr|K7EKP8|K7EKP8_HUMAN	4
Q8NI60	sp|Q8NI60|COQ8A_HUMAN	4
P61586	sp|P61586|RHOA_HUMAN	4
Q13162	sp|Q13162|PRDX4_HUMAN;tr|H7C3T4|H7C3T4_HUMAN	4
Q6FI81	sp|Q6FI81|CPIN1_HUMAN;tr|H3BV90|H3BV90_HUMAN	4
O60341	sp|O60341|KDM1A_HUMAN;tr|R4GMQ1|R4GMQ1_HUMAN;tr|R4GMP9|R4GMP9_HUMAN	4
Q92665	sp|Q92665|RT31_HUMAN	4
Q9NPJ3	sp|Q9NPJ3|ACO13_HUMAN	4
Q9NZ08	sp|Q9NZ08|ERAP1_HUMAN	4
O95793	sp|O95793|STAU1_HUMAN;tr|A0A087X1A5|A0A087X1A5_HUMAN;tr|Q5JW30|Q5JW30_HUMAN	4
P60866	sp|P60866|RS20_HUMAN;tr|E5RJX2|E5RJX2_HUMAN;tr|E5RIP1|E5RIP1_HUMAN	4
Q15836	sp|Q15836|VAMP3_HUMAN;tr|K7ENK9|K7ENK9_HUMAN;tr|K7EKX0|K7EKX0_HUMAN;tr|J3QRU4|J3QRU4_HUMAN;sp|P63027|VAMP2_HUMAN;tr|F8WCA0|F8WCA0_HUMAN;tr|L7N2F9|L7N2F9_HUMAN	4
Q9Y291	sp|Q9Y291|RT33_HUMAN;tr|C9JBY7|C9JBY7_HUMAN	4
Q8TB61	sp|Q8TB61|S35B2_HUMAN	4
O15294	sp|O15294|OGT1_HUMAN	4
P04843	sp|P04843|RPN1_HUMAN;tr|B7Z4L4|B7Z4L4_HUMAN	4
P13489	sp|P13489|RINI_HUMAN;tr|E9PMJ3|E9PMJ3_HUMAN;tr|E9PLZ3|E9PLZ3_HUMAN;tr|E9PIM9|E9PIM9_HUMAN	4
P31947	sp|P31947|1433S_HUMAN	4
Q13045	sp|Q13045|FLII_HUMAN	4
Q9BRK5	sp|Q9BRK5|CAB45_HUMAN	4
B1AJQ6	tr|B1AJQ6|B1AJQ6_HUMAN;sp|Q86Y82|STX12_HUMAN	4
Q9Y5P6	sp|Q9Y5P6|GMPPB_HUMAN	4
A0A0A0MSI9	tr|A0A0A0MSI9|A0A0A0MSI9_HUMAN;sp|Q99836|MYD88_HUMAN;tr|A0A0A0MS70|A0A0A0MS70_HUMAN;tr|H0Y4G9|H0Y4G9_HUMAN	4
Q7Z5K2	sp|Q7Z5K2|WAPL_HUMAN;tr|Q8WVX6|Q8WVX6_HUMAN;tr|F6QZY1|F6QZY1_HUMAN	4
P50995	sp|P50995|ANX11_HUMAN;tr|H0Y6E1|H0Y6E1_HUMAN	4
P15848	sp|P15848|ARSB_HUMAN;tr|A0A2U3U034|A0A2U3U034_HUMAN	4
P82914	sp|P82914|RT15_HUMAN	4
P16422	sp|P16422|EPCAM_HUMAN;tr|B5MCA4|B5MCA4_HUMAN;tr|C9JKY3|C9JKY3_HUMAN	4
P61981	sp|P61981|1433G_HUMAN	4
P21980	sp|P21980|TGM2_HUMAN	4
Q14694	sp|Q14694|UBP10_HUMAN;tr|H3BQC6|H3BQC6_HUMAN	4
F8W726	tr|F8W726|F8W726_HUMAN;sp|Q14157|UBP2L_HUMAN;tr|Q5VU77|Q5VU77_HUMAN	4
Q7RTV0	sp|Q7RTV0|PHF5A_HUMAN	4
O95372	sp|O95372|LYPA2_HUMAN;tr|Q5QPQ1|Q5QPQ1_HUMAN;tr|Q5QPQ0|Q5QPQ0_HUMAN	4
O76071	sp|O76071|CIAO1_HUMAN	4
Q9Y3D6	sp|Q9Y3D6|FIS1_HUMAN	4
Q15043	sp|Q15043|S39AE_HUMAN;tr|E5RIP4|E5RIP4_HUMAN;tr|E5RFT1|E5RFT1_HUMAN	4
Q71U36	sp|Q71U36|TBA1A_HUMAN;sp|P0DPH8|TBA3D_HUMAN;sp|P0DPH7|TBA3C_HUMAN;sp|Q6PEY2|TBA3E_HUMAN	4
P61604	sp|P61604|CH10_HUMAN;tr|B8ZZL8|B8ZZL8_HUMAN;tr|S4R3N1|S4R3N1_HUMAN	4
H9KV28	tr|H9KV28|H9KV28_HUMAN;tr|A0A140T8Z0|A0A140T8Z0_HUMAN;tr|A0A0G2JH68|A0A0G2JH68_HUMAN;sp|O60610|DIAP1_HUMAN;tr|A0A2R8Y5N1|A0A2R8Y5N1_HUMAN	4
K7EKE5	tr|K7EKE5|K7EKE5_HUMAN;sp|Q9NRH3|TBG2_HUMAN;sp|P23258|TBG1_HUMAN;tr|K7EIS0|K7EIS0_HUMAN	4
J3QSF2	tr|J3QSF2|J3QSF2_HUMAN;tr|H0YMQ9|H0YMQ9_HUMAN;tr|H0YKQ8|H0YKQ8_HUMAN;tr|B3KXX3|B3KXX3_HUMAN;tr|I3L4N6|I3L4N6_HUMAN;sp|Q9UP95|S12A4_HUMAN;sp|Q9UHW9|S12A6_HUMAN	4
Q9UBU6	sp|Q9UBU6|FA8A1_HUMAN	4
B1ANR0	tr|B1ANR0|B1ANR0_HUMAN;sp|Q13310|PABP4_HUMAN;tr|H0Y5F5|H0Y5F5_HUMAN	4
P09543	sp|P09543|CN37_HUMAN	4
P62266	sp|P62266|RS23_HUMAN;tr|D6RD47|D6RD47_HUMAN;tr|D6RDJ2|D6RDJ2_HUMAN;tr|D6RIX0|D6RIX0_HUMAN;tr|D6R9I7|D6R9I7_HUMAN	4
P59998	sp|P59998|ARPC4_HUMAN;tr|F8WCF6|F8WCF6_HUMAN;tr|F8WDD7|F8WDD7_HUMAN;tr|H7C0A3|H7C0A3_HUMAN;tr|A0A0A6YYG9|A0A0A6YYG9_HUMAN	4
C9JG87	tr|C9JG87|C9JG87_HUMAN;sp|Q9NYK5|RM39_HUMAN	4
C9IZG4	tr|C9IZG4|C9IZG4_HUMAN;sp|O60888|CUTA_HUMAN	4
G3V1R5	tr|G3V1R5|G3V1R5_HUMAN;sp|O43847|NRDC_HUMAN;tr|B1AKJ5|B1AKJ5_HUMAN;tr|H0Y5G9|H0Y5G9_HUMAN;tr|F5H7V1|F5H7V1_HUMAN	4
Q9Y266	sp|Q9Y266|NUDC_HUMAN;tr|A0A0A0MSU9|A0A0A0MSU9_HUMAN	4
O60884	sp|O60884|DNJA2_HUMAN	4
C9JHW1	tr|C9JHW1|C9JHW1_HUMAN;tr|E7ESB6|E7ESB6_HUMAN;sp|Q6Y7W6|GGYF2_HUMAN;tr|I1E4Y6|I1E4Y6_HUMAN;tr|C9JW88|C9JW88_HUMAN;tr|F8WCD5|F8WCD5_HUMAN;tr|C9JPV7|C9JPV7_HUMAN;tr|C9JXQ0|C9JXQ0_HUMAN;tr|C9J0V6|C9J0V6_HUMAN;tr|C9JHT0|C9JHT0_HUMAN;tr|C9JRZ2|C9JRZ2_HUMAN	4
Q9Y6D9	sp|Q9Y6D9|MD1L1_HUMAN;tr|C9JP81|C9JP81_HUMAN	4
E9PNF5	tr|E9PNF5|E9PNF5_HUMAN;tr|A0A0B4J216|A0A0B4J216_HUMAN;sp|Q6IA69|NADE_HUMAN	4
Q92990	sp|Q92990|GLMN_HUMAN	4
P02679	sp|P02679|FIBG_HUMAN;tr|C9JC84|C9JC84_HUMAN;tr|C9JEU5|C9JEU5_HUMAN	4
Q15366	sp|Q15366|PCBP2_HUMAN;tr|F8VZX2|F8VZX2_HUMAN;tr|H3BRU6|H3BRU6_HUMAN;tr|F8W0G4|F8W0G4_HUMAN;tr|J3QT27|J3QT27_HUMAN;tr|E9PFP8|E9PFP8_HUMAN;sp|P57721|PCBP3_HUMAN;tr|F8VXH9|F8VXH9_HUMAN;tr|F8W1G6|F8W1G6_HUMAN	4
Q9GZL7	sp|Q9GZL7|WDR12_HUMAN	4
O75955	sp|O75955|FLOT1_HUMAN;tr|A2AB12|A2AB12_HUMAN;tr|A2AB10|A2AB10_HUMAN;tr|A0A140T9R1|A0A140T9R1_HUMAN	4
P62140	sp|P62140|PP1B_HUMAN;tr|E7ETD8|E7ETD8_HUMAN;tr|F8W0W8|F8W0W8_HUMAN	4
K7EL75	tr|K7EL75|K7EL75_HUMAN	4
Q969Z0	sp|Q969Z0|FAKD4_HUMAN;tr|C9IZN7|C9IZN7_HUMAN	4
R4GMS6	tr|R4GMS6|R4GMS6_HUMAN;tr|R4GMR9|R4GMR9_HUMAN;tr|R4GN74|R4GN74_HUMAN;tr|R4GNC2|R4GNC2_HUMAN;tr|R4GN63|R4GN63_HUMAN;tr|A0A1B0GX61|A0A1B0GX61_HUMAN;tr|R4GMW0|R4GMW0_HUMAN;tr|A0A0C4DGR6|A0A0C4DGR6_HUMAN;sp|Q96NB2|SFXN2_HUMAN	4
O75380	sp|O75380|NDUS6_HUMAN;tr|D6RBT3|D6RBT3_HUMAN	4
Q15717	sp|Q15717|ELAV1_HUMAN;tr|M0QZR9|M0QZR9_HUMAN	5
Q86TX2	sp|Q86TX2|ACOT1_HUMAN;tr|G3V4F2|G3V4F2_HUMAN;tr|A0A087X0W7|A0A087X0W7_HUMAN;tr|A0A087WT95|A0A087WT95_HUMAN;sp|P49753|ACOT2_HUMAN	5
Q9H9B4	sp|Q9H9B4|SFXN1_HUMAN;tr|D6RFI0|D6RFI0_HUMAN;tr|D6RDG7|D6RDG7_HUMAN;tr|S4R2X2|S4R2X2_HUMAN	5
O95861	sp|O95861|BPNT1_HUMAN;tr|A6NF51|A6NF51_HUMAN;tr|F8VZG4|F8VZG4_HUMAN;tr|F8W1J0|F8W1J0_HUMAN	5
O96008	sp|O96008|TOM40_HUMAN;tr|K7EJ57|K7EJ57_HUMAN	5
Q7L266	sp|Q7L266|ASGL1_HUMAN	5
J3QL05	tr|J3QL05|J3QL05_HUMAN;tr|J3KP15|J3KP15_HUMAN;sp|Q01130|SRSF2_HUMAN	5
Q13228	sp|Q13228|SBP1_HUMAN	5
Q5T440	sp|Q5T440|CAF17_HUMAN	5
Q96DV4	sp|Q96DV4|RM38_HUMAN	5
C9JDF5	tr|C9JDF5|C9JDF5_HUMAN;tr|A0A0C4DG26|A0A0C4DG26_HUMAN;sp|Q9NP71|MLXPL_HUMAN	5
Q16658	sp|Q16658|FSCN1_HUMAN	5
P78527	sp|P78527|PRKDC_HUMAN	5
P25705	sp|P25705|ATPA_HUMAN;tr|K7EK77|K7EK77_HUMAN	5
P46939	sp|P46939|UTRO_HUMAN	5
Q15084	sp|Q15084|PDIA6_HUMAN	5
A0A1B0GTG2	tr|A0A1B0GTG2|A0A1B0GTG2_HUMAN;sp|P49419|AL7A1_HUMAN;tr|A0A1B0GW77|A0A1B0GW77_HUMAN;tr|A0A1B0GTY9|A0A1B0GTY9_HUMAN;tr|A0A1B0GUA1|A0A1B0GUA1_HUMAN;tr|A0A1B0GW82|A0A1B0GW82_HUMAN;tr|A0A1B0GTJ4|A0A1B0GTJ4_HUMAN;tr|A0A1B0GV49|A0A1B0GV49_HUMAN;tr|A0A0J9YWF7|A0A0J9YWF7_HUMAN	5
C9JZR2	tr|C9JZR2|C9JZR2_HUMAN;sp|O60716|CTND1_HUMAN	5
Q9UBQ7	sp|Q9UBQ7|GRHPR_HUMAN;tr|U3KQ56|U3KQ56_HUMAN	5
X6RGJ2	tr|X6RGJ2|X6RGJ2_HUMAN;sp|Q5SSJ5|HP1B3_HUMAN;tr|B0QZK4|B0QZK4_HUMAN;tr|Q5SWC8|Q5SWC8_HUMAN	5
A0A2R8Y5A0	tr|A0A2R8Y5A0|A0A2R8Y5A0_HUMAN;tr|A0A2R8YF43|A0A2R8YF43_HUMAN;tr|A0A2R8YD58|A0A2R8YD58_HUMAN;tr|E7EU96|E7EU96_HUMAN;sp|Q8NEV1|CSK23_HUMAN;sp|P68400|CSK21_HUMAN;tr|A0A2R8YEW1|A0A2R8YEW1_HUMAN;tr|V9GYA2|V9GYA2_HUMAN;tr|A0A2R8Y4D6|A0A2R8Y4D6_HUMAN;tr|A0A2R8Y4H0|A0A2R8Y4H0_HUMAN;tr|A0A2R8YDY7|A0A2R8YDY7_HUMAN;tr|A0A2R8YDP2|A0A2R8YDP2_HUMAN;tr|A0A2R8YFU2|A0A2R8YFU2_HUMAN	5
Q8NI27	sp|Q8NI27|THOC2_HUMAN;tr|A0A0C4DG98|A0A0C4DG98_HUMAN	5
P51858	sp|P51858|HDGF_HUMAN	5
P01024	sp|P01024|CO3_HUMAN	5
Q92945	sp|Q92945|FUBP2_HUMAN;tr|A0A087WTP3|A0A087WTP3_HUMAN;tr|M0R0I5|M0R0I5_HUMAN	5
O43852	sp|O43852|CALU_HUMAN	5
P62333	sp|P62333|PRS10_HUMAN;tr|A0A087X2I1|A0A087X2I1_HUMAN;tr|H0YJC0|H0YJC0_HUMAN;tr|H0YJS8|H0YJS8_HUMAN	5
Q9Y5Z4	sp|Q9Y5Z4|HEBP2_HUMAN;tr|Q5THN1|Q5THN1_HUMAN	5
P43487	sp|P43487|RANG_HUMAN;tr|F6WQW2|F6WQW2_HUMAN;tr|C9JXG8|C9JXG8_HUMAN;tr|C9JJ34|C9JJ34_HUMAN;tr|C9JGV6|C9JGV6_HUMAN	5
E9PCY7	tr|E9PCY7|E9PCY7_HUMAN;sp|P31943|HNRH1_HUMAN;tr|G8JLB6|G8JLB6_HUMAN;tr|D6RBM0|D6RBM0_HUMAN;tr|D6RIT2|D6RIT2_HUMAN;tr|D6RIU0|D6RIU0_HUMAN;tr|E7EQJ0|E7EQJ0_HUMAN;tr|D6RAM1|D6RAM1_HUMAN;tr|E5RGV0|E5RGV0_HUMAN;tr|D6R9T0|D6R9T0_HUMAN;tr|D6RFM3|D6RFM3_HUMAN;tr|E7EN40|E7EN40_HUMAN;tr|D6RDU3|D6RDU3_HUMAN;tr|D6RJ04|D6RJ04_HUMAN;tr|D6RIH9|D6RIH9_HUMAN;tr|H0YB39|H0YB39_HUMAN	5
Q96AB3	sp|Q96AB3|ISOC2_HUMAN;tr|K7ENV7|K7ENV7_HUMAN;tr|K7EKW4|K7EKW4_HUMAN	5
P35269	sp|P35269|T2FA_HUMAN;tr|M0R0Z3|M0R0Z3_HUMAN;tr|M0R0R9|M0R0R9_HUMAN;tr|M0QXD6|M0QXD6_HUMAN	5
Q86X55	sp|Q86X55|CARM1_HUMAN;tr|K7EK20|K7EK20_HUMAN;tr|K7EPK1|K7EPK1_HUMAN	5
A0A3B3ISQ6	tr|A0A3B3ISQ6|A0A3B3ISQ6_HUMAN;tr|A0A3B3IT14|A0A3B3IT14_HUMAN;tr|A0A3B3IS87|A0A3B3IS87_HUMAN;tr|G5E965|G5E965_HUMAN;tr|H0Y882|H0Y882_HUMAN;tr|A0A3B3IRW5|A0A3B3IRW5_HUMAN;tr|A0A0B4J2F3|A0A0B4J2F3_HUMAN;tr|A0A3B3IT66|A0A3B3IT66_HUMAN;tr|C9J0F0|C9J0F0_HUMAN;tr|A0A3B3IST6|A0A3B3IST6_HUMAN;tr|A0A3B3IUB6|A0A3B3IUB6_HUMAN;tr|A0A3B3IRS5|A0A3B3IRS5_HUMAN;tr|A0A3B3IST0|A0A3B3IST0_HUMAN;sp|Q9H334|FOXP1_HUMA…	5
Q01658	sp|Q01658|NC2B_HUMAN	5
Q9BRR8	sp|Q9BRR8|GPTC1_HUMAN	5
Q8WW12	sp|Q8WW12|PCNP_HUMAN	5
Q75MG1	tr|Q75MG1|Q75MG1_HUMAN;tr|E7ETZ4|E7ETZ4_HUMAN;sp|Q9Y6E2|BZW2_HUMAN;tr|E9PFE3|E9PFE3_HUMAN;tr|C9JF98|C9JF98_HUMAN;tr|F8WDX8|F8WDX8_HUMAN;tr|E9PFD4|E9PFD4_HUMAN;tr|E7EMS9|E7EMS9_HUMAN;tr|B5MCE7|B5MCE7_HUMAN;tr|B5MCH7|B5MCH7_HUMAN	5
P32929	sp|P32929|CGL_HUMAN	5
Q16822	sp|Q16822|PCKGM_HUMAN;tr|H0YML5|H0YML5_HUMAN;tr|H0YM31|H0YM31_HUMAN;tr|A0A0A0MS74|A0A0A0MS74_HUMAN	5
Q9Y2X3	sp|Q9Y2X3|NOP58_HUMAN	5
Q7KZ85	sp|Q7KZ85|SPT6H_HUMAN	5
O75191	sp|O75191|XYLB_HUMAN;tr|A0A3B3IRM4|A0A3B3IRM4_HUMAN;tr|A0A3B3IS07|A0A3B3IS07_HUMAN	5
P14927	sp|P14927|QCR7_HUMAN;tr|E5RHG9|E5RHG9_HUMAN;tr|B7Z2R2|B7Z2R2_HUMAN	5
P22033	sp|P22033|MUTA_HUMAN	5
H0Y612	tr|H0Y612|H0Y612_HUMAN;sp|Q9UPN9|TRI33_HUMAN	5
P00492	sp|P00492|HPRT_HUMAN	5
O00567	sp|O00567|NOP56_HUMAN;tr|H0YDU4|H0YDU4_HUMAN;tr|Q5JXT2|Q5JXT2_HUMAN	5
R4GNH3	tr|R4GNH3|R4GNH3_HUMAN;tr|E9PKD5|E9PKD5_HUMAN	5
G3V3M6	tr|G3V3M6|G3V3M6_HUMAN;sp|P27695|APEX1_HUMAN;tr|G3V5Q1|G3V5Q1_HUMAN;tr|G3V5M0|G3V5M0_HUMAN;tr|G3V359|G3V359_HUMAN;tr|G3V3C7|G3V3C7_HUMAN;tr|A0A0C4DGK8|A0A0C4DGK8_HUMAN;tr|G3V5D9|G3V5D9_HUMAN;tr|H7C4A8|H7C4A8_HUMAN	5
A0A0A6YYL4	tr|A0A0A6YYL4|A0A0A6YYL4_HUMAN;sp|P57737|CORO7_HUMAN	5
Q99879	sp|Q99879|H2B1M_HUMAN;sp|Q99877|H2B1N_HUMAN;sp|Q93079|H2B1H_HUMAN;sp|Q5QNW6|H2B2F_HUMAN;sp|P62807|H2B1C_HUMAN;sp|P58876|H2B1D_HUMAN;sp|O60814|H2B1K_HUMAN;tr|U3KQK0|U3KQK0_HUMAN;sp|Q99880|H2B1L_HUMAN;sp|P57053|H2BFS_HUMAN;sp|Q96A08|H2B1A_HUMAN	5
E7ETB3	tr|E7ETB3|E7ETB3_HUMAN;tr|A0A024R442|A0A024R442_HUMAN;sp|Q9ULA0|DNPEP_HUMAN;tr|E7EMB6|E7EMB6_HUMAN	5
P00439	sp|P00439|PH4H_HUMAN;tr|J3KND8|J3KND8_HUMAN;tr|F8W1D4|F8W1D4_HUMAN;tr|F8W0A0|F8W0A0_HUMAN	5
H0YG47	tr|H0YG47|H0YG47_HUMAN;sp|Q96PU8|QKI_HUMAN;tr|H0YGD6|H0YGD6_HUMAN	5
O43615	sp|O43615|TIM44_HUMAN;tr|M0QXU7|M0QXU7_HUMAN	5
Q96HS1	sp|Q96HS1|PGAM5_HUMAN;tr|F5GXG4|F5GXG4_HUMAN	5
Q9Y4Z0	sp|Q9Y4Z0|LSM4_HUMAN;tr|V9GZ56|V9GZ56_HUMAN;tr|M0QXB0|M0QXB0_HUMAN;tr|U3KQK1|U3KQK1_HUMAN	5
Q6P1N7	tr|Q6P1N7|Q6P1N7_HUMAN;tr|C9JA35|C9JA35_HUMAN;tr|A0A0G2JKZ1|A0A0G2JKZ1_HUMAN;sp|O15533|TPSN_HUMAN;tr|A2AB90|A2AB90_HUMAN;tr|A0A0G2JH37|A0A0G2JH37_HUMAN;tr|A0A0A0MSV9|A0A0A0MSV9_HUMAN	5
P63151	sp|P63151|2ABA_HUMAN;tr|E5RFR9|E5RFR9_HUMAN;sp|Q9Y2T4|2ABG_HUMAN	5
P14625	sp|P14625|ENPL_HUMAN	5
Q06830	sp|Q06830|PRDX1_HUMAN;tr|A0A0A0MSI0|A0A0A0MSI0_HUMAN	5
P22695	sp|P22695|QCR2_HUMAN;tr|H3BRG4|H3BRG4_HUMAN;tr|H3BSJ9|H3BSJ9_HUMAN;tr|H3BP04|H3BP04_HUMAN	5
Q9Y265	sp|Q9Y265|RUVB1_HUMAN;tr|E7ETR0|E7ETR0_HUMAN	5
Q99714	sp|Q99714|HCD2_HUMAN;tr|Q5H928|Q5H928_HUMAN	5
E7EPM6	tr|E7EPM6|E7EPM6_HUMAN;sp|P33121|ACSL1_HUMAN;tr|B7Z3Z9|B7Z3Z9_HUMAN	5
A8MQ02	tr|A8MQ02|A8MQ02_HUMAN;sp|P55196|AFAD_HUMAN;tr|J3KN01|J3KN01_HUMAN;tr|Q5TIG5|Q5TIG5_HUMAN	5
E7EUY3	tr|E7EUY3|E7EUY3_HUMAN;sp|P05166|PCCB_HUMAN;tr|E9PDR0|E9PDR0_HUMAN;tr|C9JQS9|C9JQS9_HUMAN;tr|E7EX59|E7EX59_HUMAN;tr|E9PEC3|E9PEC3_HUMAN;tr|E7ETT4|E7ETT4_HUMAN;tr|E7ETT1|E7ETT1_HUMAN;tr|F8WBI9|F8WBI9_HUMAN;tr|E7ENC1|E7ENC1_HUMAN	5
P51688	sp|P51688|SPHM_HUMAN	5
O75844	sp|O75844|FACE1_HUMAN	5
Q9UIA9	sp|Q9UIA9|XPO7_HUMAN;tr|E7ESC6|E7ESC6_HUMAN;tr|H0YBE1|H0YBE1_HUMAN	5
P23246	sp|P23246|SFPQ_HUMAN	5
Q3ZCM7	sp|Q3ZCM7|TBB8_HUMAN;tr|A0A075B736|A0A075B736_HUMAN;tr|Q5SQY0|Q5SQY0_HUMAN	5
P30405	sp|P30405|PPIF_HUMAN	5
Q4KMQ2	sp|Q4KMQ2|ANO6_HUMAN	5
P13798	sp|P13798|ACPH_HUMAN;tr|C9JIF9|C9JIF9_HUMAN;tr|H7C393|H7C393_HUMAN	5
P68371	sp|P68371|TBB4B_HUMAN;sp|P04350|TBB4A_HUMAN	5
O15173	sp|O15173|PGRC2_HUMAN	5
Q16186	sp|Q16186|ADRM1_HUMAN;tr|A0A087WX59|A0A087WX59_HUMAN	5
D6RGE2	tr|D6RGE2|D6RGE2_HUMAN;sp|Q96CN7|ISOC1_HUMAN	5
Q5T6L6	tr|Q5T6L6|Q5T6L6_HUMAN;sp|P00966|ASSY_HUMAN;tr|Q5T6L5|Q5T6L5_HUMAN	5
Q92466	sp|Q92466|DDB2_HUMAN;tr|A0A087WYT8|A0A087WYT8_HUMAN;tr|A0A087WW71|A0A087WW71_HUMAN;tr|A0A087X0X5|A0A087X0X5_HUMAN	5
O60488	sp|O60488|ACSL4_HUMAN	5
P30038	sp|P30038|AL4A1_HUMAN	5
Q86UP2	sp|Q86UP2|KTN1_HUMAN;tr|G3V4Y7|G3V4Y7_HUMAN	5
Q7Z6Z7	sp|Q7Z6Z7|HUWE1_HUMAN	5
O95486	sp|O95486|SC24A_HUMAN	5
J3QRD1	tr|J3QRD1|J3QRD1_HUMAN;sp|P51648|AL3A2_HUMAN;tr|I3L1M4|I3L1M4_HUMAN	5
P78406	sp|P78406|RAE1L_HUMAN;tr|E9PQ57|E9PQ57_HUMAN;tr|E9PPG9|E9PPG9_HUMAN	5
P37059	sp|P37059|DHB2_HUMAN;tr|H3BRZ6|H3BRZ6_HUMAN;tr|H3BS44|H3BS44_HUMAN;tr|H3BNN1|H3BNN1_HUMAN	5
A0A0J9YXF2	tr|A0A0J9YXF2|A0A0J9YXF2_HUMAN;tr|J3QT77|J3QT77_HUMAN;tr|A0A0J9YYG4|A0A0J9YYG4_HUMAN;sp|Q15165|PON2_HUMAN	5
Q9NX63	sp|Q9NX63|MIC19_HUMAN;tr|C9JRZ6|C9JRZ6_HUMAN;tr|F8WAR4|F8WAR4_HUMAN;tr|A0A286YEX5|A0A286YEX5_HUMAN	5
Q9Y6M1	sp|Q9Y6M1|IF2B2_HUMAN;tr|F8W930|F8W930_HUMAN	5
P07954	sp|P07954|FUMH_HUMAN	5
P30044	sp|P30044|PRDX5_HUMAN	5
F8WAE5	tr|F8WAE5|F8WAE5_HUMAN;sp|Q9BY44|EIF2A_HUMAN;tr|C9IZE1|C9IZE1_HUMAN	5
Q6PKG0	sp|Q6PKG0|LARP1_HUMAN;tr|A0A0B4J210|A0A0B4J210_HUMAN;tr|E5RH50|E5RH50_HUMAN	5
Q8TAE8	sp|Q8TAE8|G45IP_HUMAN	5
A0A087WTA5	tr|A0A087WTA5|A0A087WTA5_HUMAN;sp|Q9UI10|EI2BD_HUMAN;tr|E7ERK9|E7ERK9_HUMAN;tr|H7C2L8|H7C2L8_HUMAN;tr|A0A087WW69|A0A087WW69_HUMAN	5
Q9BSD7	sp|Q9BSD7|NTPCR_HUMAN;tr|Q5TDF0|Q5TDF0_HUMAN	5
B5MCK8	tr|B5MCK8|B5MCK8_HUMAN;sp|A6NGU5|GGT3_HUMAN;sp|P36268|GGT2_HUMAN;sp|P19440|GGT1_HUMAN;tr|E7ETR7|E7ETR7_HUMAN;tr|B5MC36|B5MC36_HUMAN;sp|Q14390|GGTL2_HUMAN;tr|A0A0C4DG87|A0A0C4DG87_HUMAN;sp|B5MD39|GGTL3_HUMAN;tr|B5MC34|B5MC34_HUMAN;tr|E7ET76|E7ET76_HUMAN	5
P29350	sp|P29350|PTN6_HUMAN;tr|F5GY79|F5GY79_HUMAN;tr|F5H0N8|F5H0N8_HUMAN	5
P49321	sp|P49321|NASP_HUMAN;tr|Q5T624|Q5T624_HUMAN	5
Q08945	sp|Q08945|SSRP1_HUMAN	5
P46109	sp|P46109|CRKL_HUMAN	5
E9PMP7	tr|E9PMP7|E9PMP7_HUMAN;tr|H0Y424|H0Y424_HUMAN;tr|E9PMS6|E9PMS6_HUMAN;tr|A0A0A0MTE2|A0A0A0MTE2_HUMAN;tr|E9PMT2|E9PMT2_HUMAN;tr|F8WD26|F8WD26_HUMAN;tr|J3KP06|J3KP06_HUMAN;sp|Q8WWI1|LMO7_HUMAN	5
O60343	sp|O60343|TBCD4_HUMAN;tr|A0A3B3IRT3|A0A3B3IRT3_HUMAN	5
K7EPS5	tr|K7EPS5|K7EPS5_HUMAN;sp|P07306|ASGR1_HUMAN;tr|J3QSZ2|J3QSZ2_HUMAN;tr|I3L129|I3L129_HUMAN	5
Q96K17	sp|Q96K17|BT3L4_HUMAN	5
Q96GW9	sp|Q96GW9|SYMM_HUMAN	5
P49915	sp|P49915|GUAA_HUMAN	5
H7BXY3	tr|H7BXY3|H7BXY3_HUMAN;sp|Q7L2E3|DHX30_HUMAN	5
Q9H4A4	sp|Q9H4A4|AMPB_HUMAN;tr|A6NKB8|A6NKB8_HUMAN	5
Q9HCC0	sp|Q9HCC0|MCCB_HUMAN;tr|D6RDF7|D6RDF7_HUMAN;tr|D6R9R1|D6R9R1_HUMAN	5
Q92785	sp|Q92785|REQU_HUMAN;tr|J3KMZ8|J3KMZ8_HUMAN	5
Q07666	sp|Q07666|KHDR1_HUMAN	5
O15446	sp|O15446|RPA34_HUMAN	5
P08621	sp|P08621|RU17_HUMAN	5
C9JQV0	tr|C9JQV0|C9JQV0_HUMAN;sp|Q9BRJ6|CG050_HUMAN	5
A0A2C9F2P4	tr|A0A2C9F2P4|A0A2C9F2P4_HUMAN;sp|P50897|PPT1_HUMAN;tr|A0A286YFF7|A0A286YFF7_HUMAN;tr|E9PIA8|E9PIA8_HUMAN;tr|Q5T0S4|Q5T0S4_HUMAN;tr|A0A286YFE3|A0A286YFE3_HUMAN;tr|A0A286YFL8|A0A286YFL8_HUMAN	5
Q15042	sp|Q15042|RB3GP_HUMAN	5
O95865	sp|O95865|DDAH2_HUMAN	5
P30837	sp|P30837|AL1B1_HUMAN	5
A0A0A0MSS8	tr|A0A0A0MSS8|A0A0A0MSS8_HUMAN;sp|P42330|AK1C3_HUMAN;tr|S4R3Z2|S4R3Z2_HUMAN	5
Q9UQE7	sp|Q9UQE7|SMC3_HUMAN	5
P14550	sp|P14550|AK1A1_HUMAN	5
A0A087WZF1	tr|A0A087WZF1|A0A087WZF1_HUMAN;sp|Q93052|LPP_HUMAN;tr|C9JUT4|C9JUT4_HUMAN;tr|C9JXK9|C9JXK9_HUMAN	5
O75822	sp|O75822|EIF3J_HUMAN;tr|H0YGJ7|H0YGJ7_HUMAN	5
Q16795	sp|Q16795|NDUA9_HUMAN;tr|A0A3B3ISG8|A0A3B3ISG8_HUMAN	5
P36543	sp|P36543|VATE1_HUMAN;tr|C9J8H1|C9J8H1_HUMAN	5
Q8NFH5	sp|Q8NFH5|NUP35_HUMAN;tr|C9IYQ7|C9IYQ7_HUMAN;tr|F8WCF5|F8WCF5_HUMAN;tr|F8WEL4|F8WEL4_HUMAN	5
Q9UF12	sp|Q9UF12|HYPDH_HUMAN	5
Q3ZCQ8	sp|Q3ZCQ8|TIM50_HUMAN;tr|M0R0C3|M0R0C3_HUMAN;tr|M0R2F8|M0R2F8_HUMAN	5
Q13451	sp|Q13451|FKBP5_HUMAN	5
H7C1D4	tr|H7C1D4|H7C1D4_HUMAN;tr|E9PGT1|E9PGT1_HUMAN;sp|Q15631|TSN_HUMAN	5
P20645	sp|P20645|MPRD_HUMAN;tr|H0YGT2|H0YGT2_HUMAN;tr|H0YF90|H0YF90_HUMAN;tr|F5GX30|F5GX30_HUMAN	5
P10909	sp|P10909|CLUS_HUMAN;tr|H0YAS8|H0YAS8_HUMAN;tr|H0YC35|H0YC35_HUMAN	5
H7C5S6	tr|H7C5S6|H7C5S6_HUMAN;sp|Q9UFC0|LRWD1_HUMAN	5
Q99538	sp|Q99538|LGMN_HUMAN;tr|H0YJN9|H0YJN9_HUMAN;tr|G3V2T4|G3V2T4_HUMAN;tr|G3V4E4|G3V4E4_HUMAN	5
M0R2A8	tr|M0R2A8|M0R2A8_HUMAN;sp|Q86TI2|DPP9_HUMAN	5
Q9P0Z9	sp|Q9P0Z9|SOX_HUMAN;tr|K7EK30|K7EK30_HUMAN;tr|K7EJU8|K7EJU8_HUMAN	5
P19338	sp|P19338|NUCL_HUMAN	5
Q93009	sp|Q93009|UBP7_HUMAN;tr|H3BND8|H3BND8_HUMAN	5
Q15459	sp|Q15459|SF3A1_HUMAN	5
P10412	sp|P10412|H14_HUMAN	5
H3BQZ7	tr|H3BQZ7|H3BQZ7_HUMAN;sp|Q1KMD3|HNRL2_HUMAN	5
G3V0E5	tr|G3V0E5|G3V0E5_HUMAN;sp|P02786|TFR1_HUMAN	5
Q9UJZ1	sp|Q9UJZ1|STML2_HUMAN;tr|A0A087WYB4|A0A087WYB4_HUMAN	5
P52948	sp|P52948|NUP98_HUMAN;tr|H7C3P6|H7C3P6_HUMAN;tr|A0A3B3ITD8|A0A3B3ITD8_HUMAN	5
E5RIW3	tr|E5RIW3|E5RIW3_HUMAN;sp|O75347|TBCA_HUMAN;tr|E5RJD8|E5RJD8_HUMAN;tr|E5RHG6|E5RHG6_HUMAN	5
Q9Y5K6	sp|Q9Y5K6|CD2AP_HUMAN	5
E9PC05	tr|E9PC05|E9PC05_HUMAN;sp|Q9H0C8|ILKAP_HUMAN;tr|F8SNU6|F8SNU6_HUMAN;tr|F8SNU7|F8SNU7_HUMAN	5
O95777	sp|O95777|LSM8_HUMAN;tr|F2Z2Y6|F2Z2Y6_HUMAN;tr|C9JIZ0|C9JIZ0_HUMAN;tr|C9JNV3|C9JNV3_HUMAN	5
Q6ZRP7	sp|Q6ZRP7|QSOX2_HUMAN	5
D6RIY6	tr|D6RIY6|D6RIY6_HUMAN;sp|Q06265|EXOS9_HUMAN;tr|D6RAP4|D6RAP4_HUMAN;tr|D6R905|D6R905_HUMAN;tr|D6RA17|D6RA17_HUMAN	5
P49792	sp|P49792|RBP2_HUMAN	5
Q8N163	sp|Q8N163|CCAR2_HUMAN;tr|G3V119|G3V119_HUMAN;tr|H0YB24|H0YB24_HUMAN	5
P42166	sp|P42166|LAP2A_HUMAN	5
P17858	sp|P17858|PFKAL_HUMAN	5
Q9H0D6	sp|Q9H0D6|XRN2_HUMAN	5
A0A3B3ITC2	tr|A0A3B3ITC2|A0A3B3ITC2_HUMAN;sp|Q13884|SNTB1_HUMAN	5
A0A3B3IS06	tr|A0A3B3IS06|A0A3B3IS06_HUMAN;tr|J3KQ96|J3KQ96_HUMAN;tr|E7ETY2|E7ETY2_HUMAN;sp|Q13428|TCOF_HUMAN;tr|H0Y8Y7|H0Y8Y7_HUMAN	5
Q14353	sp|Q14353|GAMT_HUMAN;tr|A0A1W2PR36|A0A1W2PR36_HUMAN	5
Q9UKY7	sp|Q9UKY7|CDV3_HUMAN;tr|D6R9V8|D6R9V8_HUMAN;tr|D6RFH2|D6RFH2_HUMAN;tr|H0Y8K3|H0Y8K3_HUMAN	5
Q09161	sp|Q09161|NCBP1_HUMAN	5
Q9BX68	sp|Q9BX68|HINT2_HUMAN	5
F8W9S7	tr|F8W9S7|F8W9S7_HUMAN;sp|Q14C86|GAPD1_HUMAN	5
Q9C005	sp|Q9C005|DPY30_HUMAN	5
Q7Z7H5	sp|Q7Z7H5|TMED4_HUMAN;tr|F8W7F7|F8W7F7_HUMAN	5
P49411	sp|P49411|EFTU_HUMAN	5
Q9NQG5	sp|Q9NQG5|RPR1B_HUMAN	5
P30040	sp|P30040|ERP29_HUMAN;tr|F8VY02|F8VY02_HUMAN	5
Q9H2H8	sp|Q9H2H8|PPIL3_HUMAN;tr|H7BZ14|H7BZ14_HUMAN;tr|B8ZZ77|B8ZZ77_HUMAN	5
Q8TED0	sp|Q8TED0|UTP15_HUMAN;tr|H0Y8P4|H0Y8P4_HUMAN;tr|D6RF65|D6RF65_HUMAN	5
P43155	sp|P43155|CACP_HUMAN;tr|B7ZBP5|B7ZBP5_HUMAN;tr|A6PVN3|A6PVN3_HUMAN	5
Q9Y5J1	sp|Q9Y5J1|UTP18_HUMAN	5
Q96GK7	sp|Q96GK7|FAH2A_HUMAN;sp|Q6P2I3|FAH2B_HUMAN	5
K7ENI6	tr|K7ENI6|K7ENI6_HUMAN;tr|K7ERE1|K7ERE1_HUMAN;sp|Q8N2U0|TM256_HUMAN	5
Q5VT52	sp|Q5VT52|RPRD2_HUMAN	5
A0A0J9YYL3	tr|A0A0J9YYL3|A0A0J9YYL3_HUMAN;tr|A0A0J9YVP6|A0A0J9YVP6_HUMAN;tr|A0A0J9YXJ8|A0A0J9YXJ8_HUMAN;tr|A0A0J9YXX5|A0A0J9YXX5_HUMAN;sp|Q9UHX1|PUF60_HUMAN;tr|A0A0J9YVR6|A0A0J9YVR6_HUMAN;tr|A0A0J9YWM1|A0A0J9YWM1_HUMAN;tr|H0YEM1|H0YEM1_HUMAN;tr|E9PMU7|E9PMU7_HUMAN;tr|E9PN18|E9PN18_HUMAN	5
P20618	sp|P20618|PSB1_HUMAN	5
Q8N1G2	sp|Q8N1G2|CMTR1_HUMAN	5
Q86WA6	sp|Q86WA6|BPHL_HUMAN	5
Q8N766	sp|Q8N766|EMC1_HUMAN	5
Q5JP53	tr|Q5JP53|Q5JP53_HUMAN;sp|P07437|TBB5_HUMAN;tr|Q5ST81|Q5ST81_HUMAN	5
P35637	sp|P35637|FUS_HUMAN;tr|H3BPE7|H3BPE7_HUMAN	5
Q7Z3J3	sp|Q7Z3J3|RGPD4_HUMAN	5
A0A2R8Y7S2	tr|A0A2R8Y7S2|A0A2R8Y7S2_HUMAN;sp|P51532|SMCA4_HUMAN;tr|A0A2R8Y4P4|A0A2R8Y4P4_HUMAN;tr|Q9HBD4|Q9HBD4_HUMAN;tr|A0A0A0MT49|A0A0A0MT49_HUMAN;tr|A0A2R8YGP5|A0A2R8YGP5_HUMAN;tr|A0A2R8YGG3|A0A2R8YGG3_HUMAN;tr|A0A2R8Y523|A0A2R8Y523_HUMAN;tr|A0A2R8YDA1|A0A2R8YDA1_HUMAN;tr|A0A2R8Y6V2|A0A2R8Y6V2_HUMAN;tr|A0A2R8Y4C5|A0A2R8Y4C5_HUMAN;tr|A0A2R8YF58|A0A2R8YF58_HUMAN;tr|A0A2R8Y526|A0A2R8Y526_HUMAN;tr|A0A2R8Y7Y7…	5
A0A140T9L0	tr|A0A140T9L0|A0A140T9L0_HUMAN;tr|A0A0G2JJL1|A0A0G2JJL1_HUMAN;tr|H0Y6G3|H0Y6G3_HUMAN;sp|O15213|WDR46_HUMAN	5
Q7Z7K6	sp|Q7Z7K6|CENPV_HUMAN	5
Q8WXX5	sp|Q8WXX5|DNJC9_HUMAN	5
Q8N6C5	sp|Q8N6C5|IGSF1_HUMAN	5
Q96SL4	sp|Q96SL4|GPX7_HUMAN	5
B1AKM8	tr|B1AKM8|B1AKM8_HUMAN;tr|B1AKM6|B1AKM6_HUMAN;tr|H0Y7P7|H0Y7P7_HUMAN;sp|Q9UG56|PISD_HUMAN	5
A0A0B4J1R2	tr|A0A0B4J1R2|A0A0B4J1R2_HUMAN;sp|Q9H6R3|ACSS3_HUMAN	5
P62937	sp|P62937|PPIA_HUMAN;tr|F8WE65|F8WE65_HUMAN;tr|C9J5S7|C9J5S7_HUMAN	5
Q16762	sp|Q16762|THTR_HUMAN	5
O00178	sp|O00178|GTPB1_HUMAN;tr|B0QY59|B0QY59_HUMAN	5
Q68EM7	sp|Q68EM7|RHG17_HUMAN	5
P13674	sp|P13674|P4HA1_HUMAN	5
P50895	sp|P50895|BCAM_HUMAN;tr|A0A087WXM8|A0A087WXM8_HUMAN;tr|K7ENU8|K7ENU8_HUMAN	5
Q8N1G4	sp|Q8N1G4|LRC47_HUMAN	5
P04179	sp|P04179|SODM_HUMAN;tr|F5H3C5|F5H3C5_HUMAN;tr|F5H4R2|F5H4R2_HUMAN;tr|F5GYZ5|F5GYZ5_HUMAN;tr|G8JLJ2|G8JLJ2_HUMAN	5
Q9UKX7	sp|Q9UKX7|NUP50_HUMAN	5
P82979	sp|P82979|SARNP_HUMAN;tr|F8VZQ9|F8VZQ9_HUMAN;tr|H0YHG0|H0YHG0_HUMAN	5
Q4VC31	sp|Q4VC31|CCD58_HUMAN;tr|C9JQ41|C9JQ41_HUMAN;tr|H7C525|H7C525_HUMAN	5
E9PIX0	tr|E9PIX0|E9PIX0_HUMAN;sp|Q9BTY7|HGH1_HUMAN	5
F8WAH1	tr|F8WAH1|F8WAH1_HUMAN;sp|Q9UDR5|AASS_HUMAN;tr|F8WE53|F8WE53_HUMAN	5
O75533	sp|O75533|SF3B1_HUMAN	5
Q14247	sp|Q14247|SRC8_HUMAN	5
P38117	sp|P38117|ETFB_HUMAN	5
O75909	sp|O75909|CCNK_HUMAN	5
K7EML3	tr|K7EML3|K7EML3_HUMAN;sp|Q9NUL5|RYDEN_HUMAN	5
Q01082	sp|Q01082|SPTB2_HUMAN;tr|A0A087WUZ3|A0A087WUZ3_HUMAN	5
P52272	sp|P52272|HNRPM_HUMAN;tr|A0A087X0X3|A0A087X0X3_HUMAN	5
Q12906	sp|Q12906|ILF3_HUMAN	5
P48047	sp|P48047|ATPO_HUMAN;tr|H7C0C1|H7C0C1_HUMAN	5
Q8TAV3	sp|Q8TAV3|CP2W1_HUMAN;tr|A6NJ10|A6NJ10_HUMAN;tr|H7C015|H7C015_HUMAN	5
Q9BUQ8	sp|Q9BUQ8|DDX23_HUMAN	5
S4R3N9	tr|S4R3N9|S4R3N9_HUMAN;tr|A0A0A0MS41|A0A0A0MS41_HUMAN;sp|Q9BWM7|SFXN3_HUMAN;tr|A0A1P0AYU5|A0A1P0AYU5_HUMAN	5
A0A087WZX2	tr|A0A087WZX2|A0A087WZX2_HUMAN;sp|O95139|NDUB6_HUMAN	5
Q6P587	sp|Q6P587|FAHD1_HUMAN	5
P09874	sp|P09874|PARP1_HUMAN	5
P46087	sp|P46087|NOP2_HUMAN	5
P61158	sp|P61158|ARP3_HUMAN;tr|B4DXW1|B4DXW1_HUMAN	5
E9PCH5	tr|E9PCH5|E9PCH5_HUMAN;tr|E7EVY3|E7EVY3_HUMAN;tr|B7Z574|B7Z574_HUMAN;sp|P20810|ICAL_HUMAN;tr|A0A0C4DGB5|A0A0C4DGB5_HUMAN;tr|H0Y7F0|H0Y7F0_HUMAN;tr|H0Y9H6|H0Y9H6_HUMAN;tr|E9PDE4|E9PDE4_HUMAN;tr|E7ES10|E7ES10_HUMAN;tr|E7EQ12|E7EQ12_HUMAN;tr|A0A0A0MR45|A0A0A0MR45_HUMAN;tr|E7EQA0|E7EQA0_HUMAN;tr|H0YD33|H0YD33_HUMAN	5
B4DLN1	tr|B4DLN1|B4DLN1_HUMAN;sp|Q9UBX3|DIC_HUMAN	5
C9JXF9	tr|C9JXF9|C9JXF9_HUMAN;sp|P08833|IBP1_HUMAN;tr|C9J6H2|C9J6H2_HUMAN	5
H3BQF1	tr|H3BQF1|H3BQF1_HUMAN;sp|P07741|APT_HUMAN;tr|H3BSW3|H3BSW3_HUMAN;tr|H3BQZ9|H3BQZ9_HUMAN;tr|H3BQB1|H3BQB1_HUMAN	5
Q9BWJ5	sp|Q9BWJ5|SF3B5_HUMAN	5
Q15276	sp|Q15276|RABE1_HUMAN;tr|K7ENJ9|K7ENJ9_HUMAN	5
Q9H3H3	sp|Q9H3H3|CK068_HUMAN	5
Q9Y6H1	sp|Q9Y6H1|CHCH2_HUMAN;sp|Q5T1J5|CHCH9_HUMAN	5
O15355	sp|O15355|PPM1G_HUMAN	5
Q02880	sp|Q02880|TOP2B_HUMAN;tr|E9PCY5|E9PCY5_HUMAN	5
A0A0C4DFM1	tr|A0A0C4DFM1|A0A0C4DFM1_HUMAN;sp|Q92544|TM9S4_HUMAN	5
P17252	sp|P17252|KPCA_HUMAN;tr|J3KRN5|J3KRN5_HUMAN	5
Q99733	sp|Q99733|NP1L4_HUMAN;tr|C9JZI7|C9JZI7_HUMAN;tr|E9PNW0|E9PNW0_HUMAN;tr|E9PJJ2|E9PJJ2_HUMAN;tr|E9PS34|E9PS34_HUMAN;tr|E9PNJ7|E9PNJ7_HUMAN;tr|E9PP22|E9PP22_HUMAN;tr|C9J6D1|C9J6D1_HUMAN;tr|E9PKI2|E9PKI2_HUMAN;tr|A8MXH2|A8MXH2_HUMAN;tr|E9PKT8|E9PKT8_HUMAN	5
O75489	sp|O75489|NDUS3_HUMAN	5
A0A087X208	tr|A0A087X208|A0A087X208_HUMAN;sp|O00468|AGRIN_HUMAN	5
Q9BXR0	sp|Q9BXR0|TGT_HUMAN;tr|K7ESP6|K7ESP6_HUMAN;tr|K7EJ21|K7EJ21_HUMAN	5
A0A087WVW8	tr|A0A087WVW8|A0A087WVW8_HUMAN;tr|A0A087X1Q4|A0A087X1Q4_HUMAN;tr|A0A087X175|A0A087X175_HUMAN;sp|Q99624|S38A3_HUMAN	5
A0A087WT34	tr|A0A087WT34|A0A087WT34_HUMAN;tr|A0A087X1H1|A0A087X1H1_HUMAN;tr|A0A0A0MTS6|A0A0A0MTS6_HUMAN;tr|K7EIE8|K7EIE8_HUMAN;sp|O95983|MBD3_HUMAN	5
A0A0C4DFQ1	tr|A0A0C4DFQ1|A0A0C4DFQ1_HUMAN;sp|Q13505|MTX1_HUMAN	5
H0Y8G5	tr|H0Y8G5|H0Y8G5_HUMAN;sp|Q14103|HNRPD_HUMAN;tr|H0YA96|H0YA96_HUMAN;tr|D6RAF8|D6RAF8_HUMAN;tr|D6RF44|D6RF44_HUMAN;tr|D6RD83|D6RD83_HUMAN;tr|D6RBQ9|D6RBQ9_HUMAN	5
Q15365	sp|Q15365|PCBP1_HUMAN	5
Q9HC38	sp|Q9HC38|GLOD4_HUMAN;tr|F6TLX2|F6TLX2_HUMAN;tr|I3L3Q4|I3L3Q4_HUMAN	5
A0A0A0MTB8	tr|A0A0A0MTB8|A0A0A0MTB8_HUMAN;sp|Q8NI36|WDR36_HUMAN	5
C9JSZ1	tr|C9JSZ1|C9JSZ1_HUMAN	5
P33908	sp|P33908|MA1A1_HUMAN	5
Q07954	sp|Q07954|LRP1_HUMAN	5
A6ND22	tr|A6ND22|A6ND22_HUMAN;sp|Q9Y3D3|RT16_HUMAN	5
C9J719	tr|C9J719|C9J719_HUMAN;tr|C9JJ78|C9JJ78_HUMAN;sp|Q15125|EBP_HUMAN	5
P22314	sp|P22314|UBA1_HUMAN	5
P42167	sp|P42167|LAP2B_HUMAN;tr|G5E972|G5E972_HUMAN	5
Q9Y295	sp|Q9Y295|DRG1_HUMAN	5
P09104	sp|P09104|ENOG_HUMAN;tr|F5H0C8|F5H0C8_HUMAN	5
A0A1W2PQ90	tr|A0A1W2PQ90|A0A1W2PQ90_HUMAN;sp|Q92878|RAD50_HUMAN	5
A0A0D9SEI3	tr|A0A0D9SEI3|A0A0D9SEI3_HUMAN;tr|A0A0D9SER5|A0A0D9SER5_HUMAN;tr|A0A0D9SEN2|A0A0D9SEN2_HUMAN;sp|P21127|CD11B_HUMAN;tr|Q5QPR4|Q5QPR4_HUMAN;tr|Q5QPR3|Q5QPR3_HUMAN;sp|Q9UQ88|CD11A_HUMAN	5
Q9H0S4	sp|Q9H0S4|DDX47_HUMAN	5
A0A0X1KG75	tr|A0A0X1KG75|A0A0X1KG75_HUMAN;sp|Q53SF7|COBL1_HUMAN;tr|A0A0D9SG04|A0A0D9SG04_HUMAN	5
P54577	sp|P54577|SYYC_HUMAN;tr|A0A0C4DGZ5|A0A0C4DGZ5_HUMAN	5
P13804	sp|P13804|ETFA_HUMAN;tr|H0YL12|H0YL12_HUMAN;tr|H0YLU7|H0YLU7_HUMAN;tr|H0YK49|H0YK49_HUMAN;tr|H0YKF0|H0YKF0_HUMAN;tr|H0YNX6|H0YNX6_HUMAN	5
P62310	sp|P62310|LSM3_HUMAN	5
Q86V81	sp|Q86V81|THOC4_HUMAN;tr|E9PB61|E9PB61_HUMAN	5
P54136	sp|P54136|SYRC_HUMAN	5
P32189	sp|P32189|GLPK_HUMAN;sp|Q14409|GLPK3_HUMAN	5
Q9H9A6	sp|Q9H9A6|LRC40_HUMAN	5
H7C585	tr|H7C585|H7C585_HUMAN;tr|C9JAX1|C9JAX1_HUMAN;sp|Q16595|FRDA_HUMAN;tr|A0A2R8Y5A1|A0A2R8Y5A1_HUMAN	5
P22570	sp|P22570|ADRO_HUMAN;tr|A0A0C4DFN8|A0A0C4DFN8_HUMAN;tr|A0A0A0MSZ4|A0A0A0MSZ4_HUMAN;tr|A0A0A0MT64|A0A0A0MT64_HUMAN;tr|A0A0A0MTN9|A0A0A0MTN9_HUMAN;tr|A0A0A0MTR6|A0A0A0MTR6_HUMAN;tr|A0A0C4DGN7|A0A0C4DGN7_HUMAN;tr|J3QQX3|J3QQX3_HUMAN	5
A0A0G2JQF2	tr|A0A0G2JQF2|A0A0G2JQF2_HUMAN;tr|B7WPK3|B7WPK3_HUMAN;sp|O95954|FTCD_HUMAN	5
Q9NWT6	sp|Q9NWT6|HIF1N_HUMAN	5
A0A0B4J2E5	tr|A0A0B4J2E5|A0A0B4J2E5_HUMAN;sp|Q15269|PWP2_HUMAN	5
O95478	sp|O95478|NSA2_HUMAN	5
P23528	sp|P23528|COF1_HUMAN;tr|E9PP50|E9PP50_HUMAN;tr|G3V1A4|G3V1A4_HUMAN;tr|E9PK25|E9PK25_HUMAN;tr|E9PS23|E9PS23_HUMAN;tr|E9PQB7|E9PQB7_HUMAN	5
Q14008	sp|Q14008|CKAP5_HUMAN	5
Q9UNZ2	sp|Q9UNZ2|NSF1C_HUMAN;tr|F2Z2K0|F2Z2K0_HUMAN	5
Q96PZ0	sp|Q96PZ0|PUS7_HUMAN;tr|E7EUH7|E7EUH7_HUMAN	5
P25325	sp|P25325|THTM_HUMAN;tr|B1AH49|B1AH49_HUMAN	5
A0A087X1K9	tr|A0A087X1K9|A0A087X1K9_HUMAN;tr|E5RGR0|E5RGR0_HUMAN;sp|O75608|LYPA1_HUMAN;tr|B4DP64|B4DP64_HUMAN	5
Q13148	sp|Q13148|TADBP_HUMAN;tr|A0A087WX29|A0A087WX29_HUMAN	5
Q969X5	sp|Q969X5|ERGI1_HUMAN	5
Q9NPD3	sp|Q9NPD3|EXOS4_HUMAN;tr|E9PPI9|E9PPI9_HUMAN;tr|E9PI41|E9PI41_HUMAN	5
P61960	sp|P61960|UFM1_HUMAN;tr|H0Y614|H0Y614_HUMAN	5
Q9NZI8	sp|Q9NZI8|IF2B1_HUMAN	5
O43143	sp|O43143|DHX15_HUMAN	5
Q8TD30	sp|Q8TD30|ALAT2_HUMAN	5
Q8IY81	sp|Q8IY81|SPB1_HUMAN	5
P11177	sp|P11177|ODPB_HUMAN;tr|C9J634|C9J634_HUMAN;tr|F8WF02|F8WF02_HUMAN	5
P35658	sp|P35658|NU214_HUMAN;tr|A0A0A0MSW3|A0A0A0MSW3_HUMAN;tr|H0YF36|H0YF36_HUMAN	5
Q9NSD9	sp|Q9NSD9|SYFB_HUMAN	5
O75976	sp|O75976|CBPD_HUMAN	5
O43660	sp|O43660|PLRG1_HUMAN	5
Q9BY49	sp|Q9BY49|PECR_HUMAN;tr|B4DJS2|B4DJS2_HUMAN	5
H0YEF3	tr|H0YEF3|H0YEF3_HUMAN;sp|Q8TDP1|RNH2C_HUMAN;tr|E9PN81|E9PN81_HUMAN	5
Q9BTU6	sp|Q9BTU6|P4K2A_HUMAN	5
C9J2G0	tr|C9J2G0|C9J2G0_HUMAN;tr|F8W733|F8W733_HUMAN;sp|Q9NXR7|BABA2_HUMAN	5
P60174	sp|P60174|TPIS_HUMAN	5
P52701	sp|P52701|MSH6_HUMAN;tr|A0A087WWJ1|A0A087WWJ1_HUMAN	5
Q9HAV4	sp|Q9HAV4|XPO5_HUMAN	5
M0QWZ7	tr|M0QWZ7|M0QWZ7_HUMAN;sp|Q9NP81|SYSM_HUMAN;tr|M0R2C6|M0R2C6_HUMAN;tr|M0R259|M0R259_HUMAN	5
Q9HCU5	sp|Q9HCU5|PREB_HUMAN;tr|B5MC98|B5MC98_HUMAN	5
P18859	sp|P18859|ATP5J_HUMAN;tr|A8MUH2|A8MUH2_HUMAN	5
P63165	sp|P63165|SUMO1_HUMAN;sp|G2XKQ0|SUMO5_HUMAN;tr|B8ZZN6|B8ZZN6_HUMAN;tr|B8ZZJ0|B8ZZJ0_HUMAN;tr|B8ZZ67|B8ZZ67_HUMAN;tr|B9A032|B9A032_HUMAN	5
A0A0C4DGQ6	tr|A0A0C4DGQ6|A0A0C4DGQ6_HUMAN;sp|Q96P16|RPR1A_HUMAN;tr|K7EQR8|K7EQR8_HUMAN;tr|K7EP82|K7EP82_HUMAN	5
P11388	sp|P11388|TOP2A_HUMAN	5
P78347	sp|P78347|GTF2I_HUMAN	5
Q16698	sp|Q16698|DECR_HUMAN;tr|E5RJG7|E5RJG7_HUMAN;tr|E5RFV2|E5RFV2_HUMAN;tr|E5RJD2|E5RJD2_HUMAN	5
Q9UIJ7	sp|Q9UIJ7|KAD3_HUMAN	5
P13861	sp|P13861|KAP2_HUMAN;tr|H7C330|H7C330_HUMAN	5
Q8WUM0	sp|Q8WUM0|NU133_HUMAN	5
P84022	sp|P84022|SMAD3_HUMAN;tr|H0YMP2|H0YMP2_HUMAN;tr|H0YL71|H0YL71_HUMAN;tr|H3BP09|H3BP09_HUMAN;tr|H3BVD1|H3BVD1_HUMAN;sp|O15198|SMAD9_HUMAN	5
Q92890	sp|Q92890|UFD1_HUMAN;tr|C9J6N9|C9J6N9_HUMAN;tr|C9IZG3|C9IZG3_HUMAN	5
P11586	sp|P11586|C1TC_HUMAN	5
Q92900	sp|Q92900|RENT1_HUMAN	5
P48634	sp|P48634|PRC2A_HUMAN	5
P55263	sp|P55263|ADK_HUMAN	5
P12270	sp|P12270|TPR_HUMAN	5
J3KS22	tr|J3KS22|J3KS22_HUMAN;sp|Q7Z4W1|DCXR_HUMAN;tr|J3QS36|J3QS36_HUMAN;tr|J3QL34|J3QL34_HUMAN;tr|J3KRZ4|J3KRZ4_HUMAN	5
A0A087X2B5	tr|A0A087X2B5|A0A087X2B5_HUMAN;sp|P35613|BASI_HUMAN;tr|I3L192|I3L192_HUMAN;tr|A0A087WUV8|A0A087WUV8_HUMAN	5
Q96EM0	sp|Q96EM0|T3HPD_HUMAN	5
Q14126	sp|Q14126|DSG2_HUMAN	5
Q99459	sp|Q99459|CDC5L_HUMAN	5
P04040	sp|P04040|CATA_HUMAN	5
P51991	sp|P51991|ROA3_HUMAN	5
Q9Y4W6	sp|Q9Y4W6|AFG32_HUMAN	5
P40937	sp|P40937|RFC5_HUMAN;tr|F5H5S0|F5H5S0_HUMAN	5
Q8IYB8	sp|Q8IYB8|SUV3_HUMAN	5
O00425	sp|O00425|IF2B3_HUMAN	5
Q00796	sp|Q00796|DHSO_HUMAN;tr|H0YLA4|H0YLA4_HUMAN	5
P43897	sp|P43897|EFTS_HUMAN;tr|C9JG32|C9JG32_HUMAN;tr|C9JT21|C9JT21_HUMAN;tr|F8VPA7|F8VPA7_HUMAN;tr|F8VS27|F8VS27_HUMAN	5
Q96C90	sp|Q96C90|PP14B_HUMAN	5
Q15233	sp|Q15233|NONO_HUMAN;tr|H7C367|H7C367_HUMAN	5
Q92597	sp|Q92597|NDRG1_HUMAN;tr|E5RJY1|E5RJY1_HUMAN;tr|E7ESM1|E7ESM1_HUMAN	5
H7C1G6	tr|H7C1G6|H7C1G6_HUMAN;tr|H7C152|H7C152_HUMAN;sp|Q7Z3C6|ATG9A_HUMAN	5
H0YIQ2	tr|H0YIQ2|H0YIQ2_HUMAN;sp|P49750|YLPM1_HUMAN	5
P28331	sp|P28331|NDUS1_HUMAN;tr|B4DJ81|B4DJ81_HUMAN	5
P15121	sp|P15121|ALDR_HUMAN;tr|E9PCX2|E9PCX2_HUMAN	5
Q9BZE9	sp|Q9BZE9|ASPC1_HUMAN;tr|J3QL04|J3QL04_HUMAN;tr|J3KRY8|J3KRY8_HUMAN;tr|J3QR12|J3QR12_HUMAN	5
Q14692	sp|Q14692|BMS1_HUMAN	5
P50135	sp|P50135|HNMT_HUMAN	5
E9PQP3	tr|E9PQP3|E9PQP3_HUMAN;tr|A0A0D9SF70|A0A0D9SF70_HUMAN;tr|G5E9L0|G5E9L0_HUMAN;sp|Q8N6H7|ARFG2_HUMAN	5
B5MCN0	tr|B5MCN0|B5MCN0_HUMAN;sp|Q8NHH9|ATLA2_HUMAN	5
P14618	sp|P14618|KPYM_HUMAN;tr|B4DNK4|B4DNK4_HUMAN;tr|H3BTN5|H3BTN5_HUMAN;tr|H3BQ34|H3BQ34_HUMAN;tr|H3BR70|H3BR70_HUMAN	5
P49790	sp|P49790|NU153_HUMAN	5
P16401	sp|P16401|H15_HUMAN	5
Q9BVP2	sp|Q9BVP2|GNL3_HUMAN	5
P09012	sp|P09012|SNRPA_HUMAN;tr|M0QZG7|M0QZG7_HUMAN;tr|M0R268|M0R268_HUMAN;tr|M0R221|M0R221_HUMAN;tr|M0R2B8|M0R2B8_HUMAN	5
Q9NR45	sp|Q9NR45|SIAS_HUMAN	5
H0YAC6	tr|H0YAC6|H0YAC6_HUMAN;tr|E9PEM5|E9PEM5_HUMAN;sp|P50851|LRBA_HUMAN;tr|A0A3B3ISK3|A0A3B3ISK3_HUMAN;tr|A0A3B3IS13|A0A3B3IS13_HUMAN	5
Q92522	sp|Q92522|H1X_HUMAN	5
J3KMX2	tr|J3KMX2|J3KMX2_HUMAN;tr|B9EGA3|B9EGA3_HUMAN;sp|Q92925|SMRD2_HUMAN;tr|J3QWB6|J3QWB6_HUMAN	5
J3QQY2	tr|J3QQY2|J3QQY2_HUMAN;sp|Q9UM00|TMCO1_HUMAN;tr|J9JIE6|J9JIE6_HUMAN	5
O43815	sp|O43815|STRN_HUMAN	5
Q9NRP0	sp|Q9NRP0|OSTC_HUMAN;tr|A0A087WUD3|A0A087WUD3_HUMAN	5
Q13263	sp|Q13263|TIF1B_HUMAN;tr|M0R0K9|M0R0K9_HUMAN	5
A0A3B3ISL2	tr|A0A3B3ISL2|A0A3B3ISL2_HUMAN;tr|A0A3B3IRU6|A0A3B3IRU6_HUMAN;sp|Q9GZU2|PEG3_HUMAN	5
P30153	sp|P30153|2AAA_HUMAN;tr|B3KQV6|B3KQV6_HUMAN;tr|C9J9C1|C9J9C1_HUMAN	5
Q8TCS8	sp|Q8TCS8|PNPT1_HUMAN	5
P31937	sp|P31937|3HIDH_HUMAN;tr|H7BZL2|H7BZL2_HUMAN	5
Q00534	sp|Q00534|CDK6_HUMAN	5
A0A0C4DGL3	tr|A0A0C4DGL3|A0A0C4DGL3_HUMAN;tr|H0YNW5|H0YNW5_HUMAN;tr|H0YKC5|H0YKC5_HUMAN;sp|P33316|DUT_HUMAN;tr|H0YMM5|H0YMM5_HUMAN;tr|H0YNJ9|H0YNJ9_HUMAN;tr|H0YKI0|H0YKI0_HUMAN	5
P49756	sp|P49756|RBM25_HUMAN;tr|H0YE46|H0YE46_HUMAN	5
Q96EY1	sp|Q96EY1|DNJA3_HUMAN	5
O00170	sp|O00170|AIP_HUMAN	5
B1AJY7	tr|B1AJY7|B1AJY7_HUMAN;sp|O75832|PSD10_HUMAN;tr|B1AJY6|B1AJY6_HUMAN;tr|B1AJY5|B1AJY5_HUMAN	5
O75947	sp|O75947|ATP5H_HUMAN;tr|F5H608|F5H608_HUMAN	5
Q9P258	sp|Q9P258|RCC2_HUMAN	5
P56537	sp|P56537|IF6_HUMAN	5
Q9BTV4	sp|Q9BTV4|TMM43_HUMAN	5
P42025	sp|P42025|ACTY_HUMAN	5
Q16543	sp|Q16543|CDC37_HUMAN;tr|K7EQA9|K7EQA9_HUMAN;tr|K7EL68|K7EL68_HUMAN	5
Q9Y679	sp|Q9Y679|AUP1_HUMAN	5
Q71UI9	sp|Q71UI9|H2AV_HUMAN;sp|P0C0S5|H2AZ_HUMAN;tr|C9J0D1|C9J0D1_HUMAN;tr|C9J386|C9J386_HUMAN	5
Q9Y3C6	sp|Q9Y3C6|PPIL1_HUMAN	5
Q6PGP7	sp|Q6PGP7|TTC37_HUMAN	5
P14635	sp|P14635|CCNB1_HUMAN;tr|H0YA62|H0YA62_HUMAN;tr|E9PC90|E9PC90_HUMAN	5
Q8NCU7	sp|Q8NCU7|C2C4A_HUMAN	5
Q9BYN0	sp|Q9BYN0|SRXN1_HUMAN	5
Q9Y2W2	sp|Q9Y2W2|WBP11_HUMAN;tr|F5H5G4|F5H5G4_HUMAN	5
E9PBT8	tr|E9PBT8|E9PBT8_HUMAN;tr|J3QT17|J3QT17_HUMAN;sp|Q8NBJ7|SUMF2_HUMAN;tr|A8MXB9|A8MXB9_HUMAN;tr|J3KQJ1|J3KQJ1_HUMAN;tr|F8WEV7|F8WEV7_HUMAN;tr|F8WES7|F8WES7_HUMAN;tr|F8WEX5|F8WEX5_HUMAN;tr|E9PG02|E9PG02_HUMAN;tr|C9JL30|C9JL30_HUMAN;tr|H7C3B2|H7C3B2_HUMAN;tr|C9J660|C9J660_HUMAN;tr|F8WA42|F8WA42_HUMAN	5
P06756	sp|P06756|ITAV_HUMAN	5
P32322	sp|P32322|P5CR1_HUMAN;tr|E2QRB3|E2QRB3_HUMAN;tr|J3KQ22|J3KQ22_HUMAN;tr|J3QL24|J3QL24_HUMAN;tr|J3QKT4|J3QKT4_HUMAN	5
Q96EY7	sp|Q96EY7|PTCD3_HUMAN;tr|B8ZZQ4|B8ZZQ4_HUMAN	5
Q9BYG3	sp|Q9BYG3|MK67I_HUMAN;tr|C9J6C5|C9J6C5_HUMAN	5
A0A0C4DG79	tr|A0A0C4DG79|A0A0C4DG79_HUMAN;sp|Q9NZB2|F120A_HUMAN	5
Q9NQT8	sp|Q9NQT8|KI13B_HUMAN;tr|F2Z2F9|F2Z2F9_HUMAN;tr|E7ERX9|E7ERX9_HUMAN	5
P51970	sp|P51970|NDUA8_HUMAN	5
Q9P2J5	sp|Q9P2J5|SYLC_HUMAN	5
P51149	sp|P51149|RAB7A_HUMAN;tr|C9J8S3|C9J8S3_HUMAN;tr|C9IZZ0|C9IZZ0_HUMAN;tr|C9J4V0|C9J4V0_HUMAN;tr|C9J592|C9J592_HUMAN;tr|C9J4S4|C9J4S4_HUMAN;tr|C9J7D1|C9J7D1_HUMAN	5
Q14554	sp|Q14554|PDIA5_HUMAN	5
H0Y8N7	tr|H0Y8N7|H0Y8N7_HUMAN;sp|Q9BYD6|RM01_HUMAN	5
Q15819	sp|Q15819|UB2V2_HUMAN;tr|G3V113|G3V113_HUMAN	5
P35250	sp|P35250|RFC2_HUMAN;tr|H7C5S7|H7C5S7_HUMAN;tr|H7C5P1|H7C5P1_HUMAN;tr|H7C5Q7|H7C5Q7_HUMAN;tr|F8WC37|F8WC37_HUMAN;tr|H7C5A0|H7C5A0_HUMAN;tr|H7C5G4|H7C5G4_HUMAN	5
Q9BRA2	sp|Q9BRA2|TXD17_HUMAN;tr|I3L0K2|I3L0K2_HUMAN;tr|I3L3M7|I3L3M7_HUMAN	5
C9JL85	tr|C9JL85|C9JL85_HUMAN;sp|P58546|MTPN_HUMAN	5
P29992	sp|P29992|GNA11_HUMAN;tr|A0A087WVZ3|A0A087WVZ3_HUMAN;tr|K7EL62|K7EL62_HUMAN;sp|O95837|GNA14_HUMAN;sp|P50148|GNAQ_HUMAN	5
Q9UJY4	sp|Q9UJY4|GGA2_HUMAN;tr|H3BMM6|H3BMM6_HUMAN	5
Q86XP3	sp|Q86XP3|DDX42_HUMAN;tr|A0A0A0MSJ0|A0A0A0MSJ0_HUMAN	5
[truncated: 258 more rows]
