# Supplementary material for: Global Lysine Acetylome Analysis of LPS-Stimulated HepG2 Cells Identified Hyperacetylation of PKM2 as a Metabolic Regulator in Sepsis
Source: Int J Mol Sci. 2021 Aug 8;22(16):8529. doi: 10.3390/ijms22168529 (PMC8395202; doi:10.3390/ijms22168529)
Supplement: Supplementary file 1 [file ijms-22-08529-s001.zip › ijms-1283398 suppl/Table S3. All identified list of acetylated peptides.xlsx]

## Sheet: Acetyl (K)Sites
Table S3. All identified list of acetylated peptides
Proteins	Protein names	Gene names	Localization prob	Score	Number of Acetyl (K)	Amino acid	Modified sequence	Positions within proteins	Position in peptide	Code	Charge	Mass error [ppm]	Kac site ratio (LPS 24h/Cont)	Protein ratio (LPS 24h/Cont)	Kac site ratio (LPS 24h/Cont)	Ratio H/L count	Surrounded sequence	Best PEP raw file	Best PEP scan number
P17676	CCAAT/enhancer-binding protein beta	CEBPB	1	59.116	1	K	_K(ac)PAEYGYVSLGR_	133	1	P17676_133	2	-1.3891	-	-	-	-	YGGKNCKKPAEYGYV	200719_HepG2_LPS_Kac_15cm_ExSen_2hr_ooo	9720
Q9HCM1	Retroelement silencing factor 1	RESF1	1	101.3	2	K	_EDWLK(ac)FVATK(ac)K_	1680	5	Q9HCM1_1680	2	4.4504	-	-	-	-	WLKFVATKKRTQKDS	20190613_HepG2_LPS_SILAC_KacIP_CID_120min_AS_1st-1	15177
Q9HCM1	Retroelement silencing factor 1	RESF1	1	101.3	2	K	_EDWLK(ac)FVATK(ac)K_	1685	10	Q9HCM1_1685	2	4.4504	-	-	-	-	WLKFVATKKRTQKDS	20190613_HepG2_LPS_SILAC_KacIP_CID_120min_AS_1st-1	15177
A5PLL3	Histone acetyltransferase	KAT6A	1	77.923	1	K	_GPFSK(ac)VR_	355	5	A5PLL3_355	2	-1.2099	-	-	-	-	VSKGPFSKVRTGPGR	20200603_LPS_SILAC_Kac_IP_Combine_120min	1957
O60244	Mediator of RNA polymerase II transcription subunit 14	MED14	1	69.03	1	K	_K(ac)LSDDPCPVESK_	615	1	O60244_615	2	-1.4182	-	-	-	-	TRTNAKRKLSDDPCP	200719_HepG2_LPS_Kac_15cm_ExSen_2hr_ooo	5129
H3BRT0	Sulfotransferase	SULT1A4	1	162.65	1	K	_LIK(ac)SHLPLALLPQTLLDQK_	28	3	H3BRT0_28	2	0.7079	-	-	-	-	TPPPRLIKSHLPLAL	20190709_HepG2_LPS_SILAC_KacIP_CID_120min_AS_1st	30447
H3BQX5	Sulfotransferase	SULT1A1	1	175.65	1	K	_LLK(ac)THLPLALLPQTLLDQKVK_	64	3	H3BQX5_64	3	0.88389	-	-	-	-	TPAPRLLKTHLPLAL	20190709_HepG2_LPS_SILAC_KacIP_CID_120min_AS_1st	31283
M0QXD6	Transcription initiation factor IIF subunit alpha	GTF2F1	0.999814	100.93	1	K	_AAASK(ac)LEQGKR_	323	5	M0QXD6_323	3	-0.59468	-	-	-	-	TLRAAASKLEQGKRV	200719_HepG2_LPS_Kac_15cm_ExSen_2hr_ooo	2506
B1AHF3	NADH-cytochrome b5 reductase 3	CYB5R3	1	130.64	1	K	_STPAITLESPDIK(ac)YPLR_	19	13	B1AHF3_19	2	0.56674	-	-	-	-	TLESPDIKYPLRLID	20190613_HepG2_LPS_SILAC_KacIP_CID_120min_AS_2nd-1	23495
C9JLJ1	F-box-like/WD repeat-containing protein TBL1XR1	TBL1XR1	1	82.479	1	K	_DK(ac)LAQQQAAAAAAAAAAASQQGSAK_	15	2	C9JLJ1_15	3	-0.38488	-	-	-	-	RQQAYRDKLAQQQAA	200719_HepG2_LPS_Kac_15cm_ExSen_2hr_ooo	13173
A0A1W2PQG6	Cystatin-B	CSTB	1	130.47	1	K	_VFQSLPHENK(ac)PLTLSNYQTNK_	34	10	A0A1W2PQG6_34	3	0.72772	-	-	-	-	QSLPHENKPLTLSNY	20190709_HepG2_LPS_SILAC_KacIP_CID_120min_AS_1st	18338
Q709F0	Acyl-CoA dehydrogenase family member 11	ACAD11	1	116.78	1	K	_K(ac)LYAHEVVAHWIAESR_	663	1	Q709F0_663	3	-0.95202	-	-	-	-	QRIAFKKKLYAHEVV	20190709_HepG2_LPS_SILAC_KacIP_CID_120min_AS_1st	19349
G3V5E4	Glucosamine 6-phosphate N-acetyltransferase	GNPNAT1	1	49.298	1	K	_K(ac)FGYTVSEENYM(ox)CR_	96	1	G3V5E4_96	2	0.21355	-	-	-	-	QNVGFYKKFGYTVSE	200719_HepG2_LPS_Kac_15cm_ExSen_2hr_ooo	9522
H0Y8X0	Protein DEK	DEK	1	40.625	1	K	_(ac)SASAPAAEGEGTPTQPASEK(ac)EPEM(ox)PGPR_	21	20	H0Y8X0_21	3	0.32971	-	-	-	-	PTQPASEKEPEMPGP	200719_HepG2_LPS_Kac_15cm_ExSen_2hr_ooo	9228
A0A0A0MTR6	NADPH:adrenodoxin oxidoreductase, mitochondrial	FDXR	1	61.963	1	K	_SRPVDPSVPFDSK(ac)LGVIPNVEGR_	368	13	A0A0A0MTR6_368	3	-0.76888	-	-	-	-	PSVPFDSKLGVIPNV	20200603_LPS_SILAC_Kac_IP_Combine_120min	8532
O14686	Histone-lysine N-methyltransferase 2D	KMT2D	1	149.8	1	K	_PNPLALEAGK(ac)LPCEDPELDDDFDAHK_	2985	10	O14686_2985	3	1.2404	-	-	-	-	PLALEAGKLPCEDPE	20190617_HepG2_LPS_SILAC_KacIP_CID_120min_AS_1st	28147
G3V4E7	RNA transcription, translation and transport factor protein	RTRAF	1	83.065	1	K	_LTALDYHNPAGFNCK(ac)DETEFR_	20	15	G3V4E7_20	3	0.27639	-	-	-	-	NPAGFNCKDETEFRN	20190709_HepG2_LPS_SILAC_KacIP_CID_120min_AS_1st	20341
A0A1B0GVZ3	Aminoacylase-1	ACY1	1	55.011	1	K	_(ac)TSK(ac)GPEEEHPSVTLFR_	4	3	A0A1B0GVZ3_4	2	-3.6423	-	-	-	-	MTSKGPEEEHP	200719_HepG2_LPS_Kac_15cm_ExSen_2hr_ooo	11831
D6REM6	Matrin-3	MATR3	1	89.663	1	K	_(ac)SK(ac)SFQQSSLSR_	3	2	D6REM6_3	2	0.55149	-	-	-	-	MSKSFQQSSL	20190709_HepG2_LPS_SILAC_KacIP_CID_120min_AS_1st	11966
A8MW49	Fatty acid-binding protein 1	FABP1	1	73.294	1	K	_(ac)SFSGK(ac)YQLQSQENFEAFM(ox)K_	6	5	A8MW49_6	3	-0.29255	-	-	-	-	MSFSGKYQLQSQE	20200603_LPS_SILAC_Kac_IP_Combine_120min	9631
E5RG27	Casein kinase I isoform alpha	CSNK1A1	1	42.947	1	K	_(ac)ASSSGSK(ac)AEFIVGGK_	8	7	E5RG27_8	2	1.2261	-	-	-	-	MASSSGSKAEFIVGG	200719_HepG2_LPS_Kac_15cm_ExSen_2hr_ooo	12650
Q9NXE8	Pre-mRNA-splicing factor CWC25 homolog	CWC25	1	82.774	2	K	_ELLQMSLEK(ac)K(ac)EK_	173	9	Q9NXE8_173	2	-3.8416	-	-	-	-	LQMSLEKKEKKKKKE	20190617_HepG2_LPS_SILAC_KacIP_CID_120min_AS_1st	7298
Q9NXE8	Pre-mRNA-splicing factor CWC25 homolog	CWC25	1	82.774	2	K	_ELLQMSLEK(ac)K(ac)EK_	174	10	Q9NXE8_174	2	-3.8416	-	-	-	-	LQMSLEKKEKKKKKE	20190617_HepG2_LPS_SILAC_KacIP_CID_120min_AS_1st	7298
I3L1L3	Myb-binding protein 1A	MYBBP1A	1	108.9	1	K	_DQEALM(ox)K(ac)SVK_	78	7	I3L1L3_78	2	0.20086	-	-	-	-	KDQEALMKSVKLLQA	200719_HepG2_LPS_Kac_15cm_ExSen_2hr_ooo	4948
A0A096LNH5	Glutamine amidotransferase-like class 1 domain-containing protein 3B, mitochondrial	GATD3B	1	70.449	1	K	_GVEVTVGHEQEEGGK(ac)WPYAGTAEAIK_	117	15	A0A096LNH5_117	3	0.98234	-	-	-	-	HEQEEGGKWPYAGTA	20190613_HepG2_LPS_SILAC_KacIP_CID_120min_AS_1st-1	18195
P51659	Peroxisomal multifunctional enzyme type 2	HSD17B4	1	48.899	1	K	_GGK(ac)AVANYDSVEEGEK_	68	3	P51659_68	2	-1.5714	-	-	-	-	EIRRRGGKAVANYDS	200719_HepG2_LPS_Kac_15cm_ExSen_2hr_ooo	6648
E9PJA7	Bcl-2-associated transcription factor 1	BCLAF1	0.986802	40.086	1	K	_SK(ac)SQEEPKDTFEHDPSESIDEFNK_	180	2	E9PJA7_180	4	0.43044	-	-	-	-	EESPLKSKSQEEPKD	20200603_LPS_SILAC_Kac_IP_Combine_120min	4511
B1AK63	Chromatin modification-related protein MEAF6	MEAF6	1	52.326	1	K	_EPGSGTESDTSPDFHNQENEPSQEDPEDLDGSVQGVK(ac)PQK_	129	37	B1AK63_129	4	1.1335	-	-	-	-	DGSVQGVKPQKAASS	20190709_HepG2_LPS_SILAC_KacIP_CID_120min_AS_2nd	16166
F8WES8	THO complex subunit 5 homolog	THOC5	1	78.342	1	K	_SDGAPAEGK(ac)R_	24	9	F8WES8_24	2	2.1392	-	-	-	-	DGAPAEGKRNRSDTE	200719_HepG2_LPS_Kac_15cm_ExSen_2hr_ooo	2271
P04732	Metallothionein-1E	MT1E	1	155.09	1	K	_CAQGCVCK(ac)GASEK_	51	8	P04732_51	2	0.98031	-	-	-	-	CAQGCVCKGASEKCS	20190617_HepG2_LPS_SILAC_KacIP_CID_120min_AS_2nd	1942
B1AK63	Chromatin modification-related protein MEAF6	MEAF6	1	264.03	2	K	_YLTNQK(ac)NSNSK(ac)NDR_	52	11	B1AK63_52	2	0.32172	6.0475	-	-	1	NQKNSNSKNDRRNRK	20200603_LPS_SILAC_Kac_IP_Combine_120min	1580
Q9BYX7	Putative beta-actin-like protein 3	POTEKP	1	69.345	1	K	_EITALAPSIM(ox)K(ac)IK_	326	11	Q9BYX7_326	2	0.44936	1.6834	-	-	1	ALAPSIMKIKIIAPP	20190709_HepG2_LPS_SILAC_KacIP_CID_120min_AS_1st	20251
A0A0J9YWJ4	RNA polymerase II subunit A C-terminal domain phosphatase	CTDP1	1	105.13		K	_IYDSNTGK(ac)LIR_	712	8	A0A0J9YWJ4_712	2	0.60053	1.6612	-	-	1	IYDSNTGKLIRTGAR	20190709_HepG2_LPS_SILAC_KacIP_CID_120min_AS_1st	11202
A0A087WVM7	Ribosomal RNA small subunit methyltransferase NEP1	EMG1	1	82.515	1	K	_VGK(ac)TYELLNCDK_	14	3	A0A087WVM7_14	2	0.20564	1.6293	-	-	1	LETVKVGKTYELLNC	20190709_HepG2_LPS_SILAC_KacIP_CID_120min_AS_1st	13876
A0A087WY81	60S ribosomal protein L17	RPL17	1	67.113	1	K	_YLK(ac)DVTLQK_	49	3	A0A087WY81_49	2	0.84575	1.5441	-	-	1	RKATKYLKDVTLQKQ	200719_HepG2_LPS_Kac_15cm_ExSen_2hr_ooo	8032
Q05BQ5	MBT domain-containing protein 1	MBTD1	1	66.299	1	K	_DAFYSK(ac)TK_	69	6	Q05BQ5_69	2	0.37384	1.5307	-	-	1	VRDAFYSKTKRFCSV	200719_HepG2_LPS_Kac_15cm_ExSen_2hr_ooo	5689
Q5JYA8	Monofunctional C1-tetrahydrofolate synthase, mitochondrial	MTHFD1L	1	200.19	1	K	_DVDGVTDINLGK(ac)LVR_	79	12	Q5JYA8_79	2	0.75558	1.5218	-	-	8	VTDINLGKLVRGDAH	20200603_LPS_SILAC_Kac_IP_Combine_120min	9290
Q3BDU5	Prelamin-A/C	LMNA	1	85.533	1	K	_K(ac)LLEGEEER_	378	1	Q3BDU5_378	2	-0.3125	1.5208	-	-	1	MEIHAYRKLLEGEEE	200719_HepG2_LPS_Kac_15cm_ExSen_2hr_ooo	5196
Q3BDU5	Prelamin-A/C	LMNA	1	70.942	1	K	_TYSAK(ac)LDNAR_	270	5	Q3BDU5_270	2	-0.090725	1.4851	-	-	1	LEKTYSAKLDNARQS	200719_HepG2_LPS_Kac_15cm_ExSen_2hr_ooo	5187
Q96T23	Remodeling and spacing factor 1	RSF1	1	187.76	1	K	_GK(ac)DISTITGHR_	1050	2	Q96T23_1050	3	-0.13948	1.4683	-	-	19	GGGVGRGKDISTITG	200719_HepG2_LPS_Kac_15cm_ExSen_2hr_ooo	5715
O95696	Bromodomain-containing protein 1	BRD1	1	68.371	1	K	_ESSVK(ac)TVR_	418	5	O95696_418	2	-0.3806	1.4602	-	-	1	CRKESSVKTVRSTSK	200719_HepG2_LPS_Kac_15cm_ExSen_2hr_ooo	2796
Q09472	Histone acetyltransferase p300	EP300	1	50.029	1	K	_M(ox)EK(ac)LGLGLDDESNNQQAAATQSPGDSR_	1707	3	Q09472_1707	3	-0.7844	1.4551	-	-	1	NHDHKMEKLGLGLDD	200719_HepG2_LPS_Kac_15cm_ExSen_2hr_ooo	10921
E9PRX2	Transcription factor p65	RELA	1	100.11	1	K	_CIHSFQNLGIQCVK(ac)K_	91	14	E9PRX2_91	3	0.25061	1.4542	-	-	5	NLGIQCVKKRDL	20200603_LPS_SILAC_Kac_IP_Combine_120min	4797
H3BV17	Glycerol-3-phosphate phosphatase	PGP	1	74.392	1	K	_NNQESDCVSK(ac)K_	36	10	H3BV17_36	2	2.4739	1.4212	-	-	1	QESDCVSKKKMVPDF	200719_HepG2_LPS_Kac_15cm_ExSen_2hr_ooo	2359
Q09472	Histone acetyltransferase p300	EP300	1	196.11	1;2	K	_TSK(ac)NK(ac)SSLSR_	1560	5	Q09472_1560	2	0.34024	1.4093	-	-	2	NKKTSKNKSSLSRGN	200719_HepG2_LPS_Kac_15cm_ExSen_2hr_ooo	3405
A6NM56	Diamine acetyltransferase 1	SAT1	1	91.317	1	K	_ELAK(ac)YEYM(ox)EEQVILTEK_	26	4	A6NM56_26	3	0.69884	1.405	-	-	1	RLIKELAKYEYMEEQ	200719_HepG2_LPS_Kac_15cm_ExSen_2hr_ooo	14041
P62987	Ubiquitin-60S ribosomal protein L40	UBA52	1	67.08	1	K	_QLAQK(ac)YNCDK_	88	5	P62987_88	2	1.6559	1.375	-	-	1	SLRQLAQKYNCDKMI	200719_HepG2_LPS_Kac_15cm_ExSen_2hr_ooo	4035
G3V361	Calmodulin-1	CALM1	1	65.231	1	K	_VFDK(ac)DGNGYISAAELR_	59	4	G3V361_59	2	0.0071056	1.3444	-	-	1	EAFRVFDKDGNGYIS	200719_HepG2_LPS_Kac_15cm_ExSen_2hr_ooo	12988
B1AH48	Thiosulfate sulfurtransferase	TST	1	94.45	1	K	_ALVSTK(ac)WLAESIR_	14	6	B1AH48_14	2	-0.58128	1.3367	-	-	2	YRALVSTKWLAESIR	20190709_HepG2_LPS_SILAC_KacIP_CID_120min_AS_2nd	23699
P04437	T cell receptor alpha variable 29/delta variable 5	TRAV29DV5	0.816836	48.616	1	K	_YPAEGPTFLISISSIKDK(ac)NEDGR_	82	18	P04437_82	3	2.4801	1.3306	-	-	1	SISSIKDKNEDGRFT	20190709_HepG2_LPS_SILAC_KacIP_CID_120min_AS_2nd	12693
B5MBX1	E3 ubiquitin-protein ligase Jade-2	JADE2	1	161.48	2	K	_CSK(ac)LPSSTK(ac)SGWPR_	32	3	B5MBX1_32	2	-1.4046	1.3182	-	-	11	TSASRCSKLPSSTKS	20190613_HepG2_LPS_SILAC_KacIP_CID_120min_AS_1st-1	12880
Q9Y2F5	Little elongation complex subunit 1	ICE1	1	78.556	1	K	_ASEIGEK(ac)YR_	1218	7	Q9Y2F5_1218	2	-0.0074374	1.3157	-	-	1	KASEIGEKYRKQPCE	200719_HepG2_LPS_Kac_15cm_ExSen_2hr_ooo	4622
Q96T23	Remodeling and spacing factor 1	RSF1	1	201.72	1	K	_GK(ac)DISTILDEERK_	1061	2	Q96T23_1061	3	-1.4955	1.2923	-	-	25	TITGHRGKDISTILD	20190613_HepG2_LPS_SILAC_KacIP_CID_120min_AS_1st-2	16435
H0Y5N4	Transcription factor SOX-10	SOX10	1	100.74	1	K	_TLGK(ac)LWR_	17	4	H0Y5N4_17	2	0.34876	1.2854	-	-	1	ELSKTLGKLWRLLNE	200719_HepG2_LPS_Kac_15cm_ExSen_2hr_ooo	9793
Q8NEF9	Serum response factor-binding protein 1	SRFBP1	1	46.88	1	K	_EQQSNIAVFQGK(ac)K_	423	12	Q8NEF9_423	2	-0.13385	1.2657	-	-	1	NIAVFQGKKITFDD	200719_HepG2_LPS_Kac_15cm_ExSen_2hr_ooo	7837
C9JUX3	Protein FRG2-like-2	FRG2C	1	49.188	1	K	_QGSDPNPNK(ac)ENSEETK_	67	9	C9JUX3_67	2	-0.21618	1.2655	-	-	1	GSDPNPNKENSEETK	200719_HepG2_LPS_Kac_15cm_ExSen_2hr_ooo	2498
Q96T23	Remodeling and spacing factor 1	RSF1	0.980544	86.944	1	K	_VLPSEQESTK(ac)KPYR_	1338	10	Q96T23_1338	3	-0.14623	1.2528	-	-	1	PSEQESTKKPYRIES	200719_HepG2_LPS_Kac_15cm_ExSen_2hr_ooo	4616
Q09472	Histone acetyltransferase p300	EP300	1	203.04	1	K	_FVYTCNECK(ac)HHVETR_	1674	9	Q09472_1674	3	-0.08721	1.2521	-	-	13	VYTCNECKHHVETRW	20200603_LPS_SILAC_Kac_IP_Combine_120min	1688
E7EWM1	Nuclear receptor coactivator 2	NCOA2	1	156.6	1	K	_TDPASNTK(ac)LIAM(ox)K_	780	8	E7EWM1_780	2	0.077346	1.2401	-	-	13	TDPASNTKLIAMKTE	20200603_LPS_SILAC_Kac_IP_Combine_120min	2646
H0YBG3	Myc proto-oncogene protein	MYC	1	193.06	1	K	_LVSEK(ac)LASYQAAR_	162	5	H0YBG3_162	3	-0.17858	1.2345	-	-	10	AAKLVSEKLASYQAA	20200603_LPS_SILAC_Kac_IP_Combine_120min	4471
H0Y721	Mitochondrial tRNA methylthiotransferase CDK5RAP1	CDK5RAP1	1	112.64	1	K	_NDGNLK(ac)VIFPDAEMEDVNNPGLR_	201	6	H0Y721_201	3	0.56227	1.2216	-	-	5	GRNDGNLKVIFPDAE	20190709_HepG2_LPS_SILAC_KacIP_CID_120min_AS_3rd	27079
A0A1W2PQS6	RPS10-NUDT3 readthrough	RPS10-NUDT3	1	69.261	1	K	_EVCEEAGVK(ac)GTLGR_	193	9	A0A1W2PQS6_193	2	-0.66044	1.2156	-	-	1	VCEEAGVKGTLGRLV	200719_HepG2_LPS_Kac_15cm_ExSen_2hr_ooo	7793
P55201	Peregrin	BRPF1	1	114.78	1	K	_GK(ac)PSFSR_	1027	2	P55201_1027	2	-0.38618	1.2156	-	-	1	PSKQGRGKPSFSRGT	200719_HepG2_LPS_Kac_15cm_ExSen_2hr_ooo	4145
A0A3B3IU93	Histone acetyltransferase	KAT6B	1	124.21	2	K	_QSPAK(ac)VQSK(ac)NK_	859	9	A0A3B3IU93_859	2	-0.70924	1.215	-	-	2	SPAKVQSKNKYLHSP	20190617_HepG2_LPS_SILAC_KacIP_CID_120min_AS_1st	1306
A0A3B3IU93	Histone acetyltransferase	KAT6B	1	124.21	2	K	_QSPAK(ac)VQSK(ac)NK_	855	5	A0A3B3IU93_855	2	-0.70924	1.215	-	-	2	NSRQSPAKVQSKNKY	20190617_HepG2_LPS_SILAC_KacIP_CID_120min_AS_1st	1306
E5RIU6	Cyclin-dependent kinase 1	CDK1	1	64.73	1	K	_(ac)M(ox)EDYTK(ac)IEK_	6	6	E5RIU6_6	2	-1.2091	1.2119	-	-	1	MEDYTKIEKIGEG	200719_HepG2_LPS_Kac_15cm_ExSen_2hr_ooo	8669
Q09472	Histone acetyltransferase p300	EP300	1	69.275	1	K	_LYATM(ox)EK(ac)HK_	1590	7	Q09472_1590	3	-1.3325	1.2085	-	-	1	KLYATMEKHKEVFFV	200719_HepG2_LPS_Kac_15cm_ExSen_2hr_ooo	2472
Q92585	Mastermind-like protein 1	MAML1	1	48.655	1	K	_ALAGVVLPSQGPGGASELSSAHQLQQIAAK(ac)QK_	405	30	Q92585_405	3	-0.075316	1.2071	-	-	1	QLQQIAAKQKREQML	20200603_LPS_SILAC_Kac_IP_Combine_120min	8255
P16104	Histone H2AX	H2AX	1	111.06	2	K	_GK(ac)TGGK(ac)AR_	6	2	P16104_6	2	0.84772	1.2068	-	-	5	MSGRGKTGGKARA	20190617_HepG2_LPS_SILAC_KacIP_CID_120min_AS_1st	388
P16104	Histone H2AX	H2AX	1	111.06	2	K	_GK(ac)TGGK(ac)AR_	10	6	P16104_10	2	0.84772	1.2068	-	-	5	GRGKTGGKARAKAKS	20190617_HepG2_LPS_SILAC_KacIP_CID_120min_AS_1st	388
Q8WWQ0	PH-interacting protein	PHIP	1	99.663	1	K	_ANASAIPGK(ac)TILENSVK_	1542	9	Q8WWQ0_1542	2	0.54558	1.2066	-	-	3	NASAIPGKTILENSV	20190709_HepG2_LPS_SILAC_KacIP_CID_120min_AS_1st	21180
A0A096LNW1	DNA helicase	ATRX	1	160.03	1	K	_VQDGLSDIAEK(ac)FLK_	938	11	A0A096LNW1_938	2	-0.30237	1.1913	-	-	8	GLSDIAEKFLKKDQS	20200603_LPS_SILAC_Kac_IP_Combine_120min	10523
Q09472	Histone acetyltransferase p300	EP300	1	51.135	1	K	_NANCSLPSCQK(ac)M(ox)K_	1760	11	Q09472_1760	2	-0.019647	1.191	-	-	1	CSLPSCQKMKRVVQH	200719_HepG2_LPS_Kac_15cm_ExSen_2hr_ooo	3798
K7EPU6	Putative oxidoreductase GLYR1	GLYR1	1	90.15	1	K	_LSLSEGK(ac)VK_	37	7	K7EPU6_37	2	-0.14036	1.1827	-	-	1	KLSLSEGKVKKNMGE	200719_HepG2_LPS_Kac_15cm_ExSen_2hr_ooo	6514
C9JMM0	Chromobox protein homolog 3	CBX3	1	116.71	1	K	_VVNGK(ac)VEYFLK_	44	5	C9JMM0_44	2	0.088343	1.1818	-	-	6	DRRVVNGKVEYFLKW	20190709_HepG2_LPS_SILAC_KacIP_CID_120min_AS_2nd	17752
D6RCB6	Bifunctional lysine-specific demethylase and histidyl-hydroxylase	RIOX2	1	63.694	1	K	_EEGPAPCK(ac)QM(ox)K_	20	8	D6RCB6_20	2	0.42685	1.1811	-	-	1	EEGPAPCKQMKLEAA	200719_HepG2_LPS_Kac_15cm_ExSen_2hr_ooo	2629
E9PC52	Histone-binding protein RBBP7	RBBP7	1	196.18	1	K	_(ac)ASK(ac)EM(ox)FEDTVEER_	4	3	E9PC52_4	2	0.27093	1.181	-	-	8	MASKEMFEDTV	20190709_HepG2_LPS_SILAC_KacIP_CID_120min_AS_1st	24183
A0A087WV29	RNA cytidine acetyltransferase	NAT10	1	171.67	1	K	_SLSLK(ac)LIQQLR_	273	5	A0A087WV29_273	2	0.09549	1.1809	-	-	10	TGRSLSLKLIQQLRQ	20200603_LPS_SILAC_Kac_IP_Combine_120min	8401
Q9NS73	MAP3K12-binding inhibitory protein 1	MBIP	1	81.017	1	K	_ILELEGISPEYFQSVSFSGK(ac)R_	301	20	Q9NS73_301	3	0.22183	1.1742	-	-	1	QSVSFSGKRRKVQPP	20190709_HepG2_LPS_SILAC_KacIP_CID_120min_AS_2nd	30680
Q6ZQQ6	WD repeat-containing protein 87	WDR87	1	108.09	1	K	_ATAQK(ac)LK_	1187	5	Q6ZQQ6_1187	2	0.15527	1.1694	-	-	4	DKKATAQKLKKKHKK	20190613_HepG2_LPS_SILAC_KacIP_CID_120min_AS_2nd-2	953
A0A286YF34	D-3-phosphoglycerate dehydrogenase	PHGDH	1	100.18	1	K	_K(ac)ILQDGGLQVVEK_	21	1	A0A286YF34_21	2	0.21254	1.1688	-	-	2	SLDPCCRKILQDGGL	200719_HepG2_LPS_Kac_15cm_ExSen_2hr_ooo	10429
G3V555	Heterogeneous nuclear ribonucleoproteins C1/C2	HNRNPC	1	88.101	1	K	_(ac)ASNVTNK(ac)TDPR_	8	7	G3V555_8	2	1.3424	1.1665	-	-	2	MASNVTNKTDPRSMN	20190709_HepG2_LPS_SILAC_KacIP_CID_120min_AS_1st	8661
Q3BDU5	Prelamin-A/C	LMNA	1	218.64	1	K	_ASSHSSQTQGGGSVTK(ac)K_	417	16	Q3BDU5_417	3	0.51302	1.1659	-	-	1	QGGGSVTKKRKLEST	20190613_HepG2_LPS_SILAC_KacIP_CID_120min_AS_1st-1	316
Q15059	Bromodomain-containing protein 3	BRD3	1	96.113	1	K	_SK(ac)EELAQEK_	657	2	Q15059_657	2	0.86882	1.1634	-	-	1	KKQAAKSKEELAQEK	200719_HepG2_LPS_Kac_15cm_ExSen_2hr_ooo	3376
Q9UNL4	Inhibitor of growth protein 4	ING4	1	100.19	1	K	_GK(ac)WFCPR_	236	2	Q9UNL4_236	2	0.94725	1.1595	-	-	4	LTTKPRGKWFCPRCS	20190709_HepG2_LPS_SILAC_KacIP_CID_120min_AS_1st	12020
J3QRQ7	RNA helicase	DDX5	1	86.344	1	K	_FGNPGEK(ac)LVK_	40	7	J3QRQ7_40	2	1.3101	1.1546	-	-	2	KFGNPGEKLVKKKWN	200719_HepG2_LPS_Kac_15cm_ExSen_2hr_ooo	8057
F8VTR4	YEATS domain-containing protein 4	YEATS4	1	84.753	1	K	_LFQSDTNAM(ox)LGK(ac)K_	73	12	F8VTR4_73	2	-0.45518	1.1538	-	-	2	DTNAMLGKKTVVSEF	20200603_LPS_SILAC_Kac_IP_Combine_120min	3198
Q96T17	MAP7 domain-containing protein 2	MAP7D2	1	133.58	1	K	_AENSAALGKPTAGTTDAGEAAK(ac)ILAEK_	402	22	Q96T17_402	3	0.55177	1.151	-	-	6	TDAGEAAKILAEKRR	200719_HepG2_LPS_Kac_15cm_ExSen_2hr_ooo	11200
C9JP58	Histone-lysine N-methyltransferase KMT5B	KMT5B	1	104.05	1	K	_LQHTGK(ac)DTLK_	37	6	C9JP58_37	3	-0.019176	1.1501	-	-	2	SKLQHTGKDTLKAGK	20190709_HepG2_LPS_SILAC_KacIP_CID_120min_AS_2nd	2651
Q6ZU65	Ubinuclein-2	UBN2	1	250.39	1	K	_NLQAPSK(ac)LTNSSSTGTVGK_	1148	7	Q6ZU65_1148	2	-0.56773	1.1472	-	-	11	KNLQAPSKLTNSSST	20190617_HepG2_LPS_SILAC_KacIP_CID_120min_AS_1st	11983
Q6ZU65	Ubinuclein-2	UBN2	1	76.17	1	K	_TSDK(ac)PLM(ox)YR_	976	4	Q6ZU65_976	2	0.62321	1.1443	-	-	1	SLIKTSDKPLMYRLP	200719_HepG2_LPS_Kac_15cm_ExSen_2hr_ooo	5463
E7ER40	PHD finger protein 3	PHF3	1	111.65	1	K	_AAK(ac)VATK_	226	3	E7ER40_226	2	-0.7734	1.1385	-	-	2	VPEEKAAKVATKIEK	200719_HepG2_LPS_Kac_15cm_ExSen_2hr_ooo	2183
B4DDC6	Prostaglandin E synthase 3	PTGES3	1	87.184	1	K	_DVNVNFEK(ac)SK_	33	8	B4DDC6_33	2	-0.20623	1.1366	-	-	2	DVNVNFEKSKLTFSC	200719_HepG2_LPS_Kac_15cm_ExSen_2hr_ooo	7677
H3BT13	Small nuclear ribonucleoprotein Sm D3	SNRPD3	1	97.94	1	K	_(ac)SIGVPIK(ac)VLHEAEGHIVTCETNTGEVYR_	8	7	H3BT13_8	3	-0.50812	1.1361	-	-	8	MSIGVPIKVLHEAEG	20190613_HepG2_LPS_SILAC_KacIP_CID_120min_AS_1st-1	30112
M0R088	Serine/arginine repetitive matrix protein 1	SRRM1	1	87.641	1	K	_QIEQEK(ac)LASM(ox)K_	101	6	M0R088_101	2	1.0457	1.1347	-	-	1	QRQIEQEKLASMKKQ	200719_HepG2_LPS_Kac_15cm_ExSen_2hr_ooo	4867
Q49AI2	BPHL protein	BPHL	1	63.624	1	K	_DAVDLM(ox)K(ac)ALK_	109	7	Q49AI2_109	2	0.6137	1.134	-	-	1	KDAVDLMKALKFKKV	200719_HepG2_LPS_Kac_15cm_ExSen_2hr_ooo	10074
Q92994	Transcription factor IIIB 90 kDa subunit	BRF1	1	52.576	1	K	_SGADPVTSVGK(ac)R_	590	11	Q92994_590	2	-2.3952	1.1336	-	-	1	DPVTSVGKRLRPLVS	200719_HepG2_LPS_Kac_15cm_ExSen_2hr_ooo	5015
F2Z2S8	40S ribosomal protein S3	RPS3	1	73.499	1	K	_YK(ac)LLGGLAVR_	108	2	F2Z2S8_108	2	-0.35731	1.1308	-	-	3	QAESLRYKLLGGLAV	20190709_HepG2_LPS_SILAC_KacIP_CID_120min_AS_1st	19604
O14686	Histone-lysine N-methyltransferase 2D	KMT2D	1	113.13	1	K	_VEPAPAANSLGLGLK(ac)PGQSM(ox)M(ox)GSR_	3155	15	O14686_3155	3	-0.71947	1.13	-	-	10	NSLGLGLKPGQSMMG	20200603_LPS_SILAC_Kac_IP_Combine_120min	6047
K7EP38	Casein kinase I isoform gamma-2	CSNK1G2	1	78.964	1	K	_K(ac)IGCGNFGELR_	51	1	K7EP38_51	2	0.33173	1.1296	-	-	2	PNFRVGKKIGCGNFG	200719_HepG2_LPS_Kac_15cm_ExSen_2hr_ooo	8867
H0YEN5	40S ribosomal protein S2	RPS2	1	87.388	1	K	_SPYQEFTDHLVK(ac)THTR_	177	12	H0YEN5_177	3	0.55763	1.1285	-	-	3	EFTDHLVKTHTRVSV	20200603_LPS_SILAC_Kac_IP_Combine_120min	4786
Q92613	Protein Jade-3	JADE3	1	176.18	2	K	_IK(ac)SK(ac)IPNEHK_	30	2	Q92613_30	3	-0.90986	1.1265	-	-	5	SGSMYRIKSKIPNEH	20200603_LPS_SILAC_Kac_IP_Combine_120min	1515
A0A087WTP3	Far upstream element-binding protein 2	KHSRP	1	192.19	1	K	_QIAAK(ac)IGGDAATTVNNSTPDFGFGGQKR_	87	5	A0A087WTP3_87	3	-0.40404	1.1235	-	-	15	RARQIAAKIGGDAAT	20190709_HepG2_LPS_SILAC_KacIP_CID_120min_AS_1st	22113
I3L0K7	Heat shock protein 75 kDa, mitochondrial	TRAP1	1	94.767	1	K	_LIK(ac)FFIDQSK_	215	3	I3L0K7_215	2	-0.016206	1.1212	-	-	1	VLQQRLIKFFIDQSK	20200603_LPS_SILAC_Kac_IP_Combine_120min	7181
C9JMM0	Chromobox protein homolog 3	CBX3	1	126.19	1	K	_(ac)ASNK(ac)TTLQK_	5	4	C9JMM0_5	2	0.10235	1.1132	-	-	3	MASNKTTLQKMG	20200603_LPS_SILAC_Kac_IP_Combine_120min	1853
Q09472	Histone acetyltransferase p300	EP300	1	142	1	K	_VVQHTK(ac)GCK_	1769	6	Q09472_1769	2	0.396	1.1074	-	-	1	KRVVQHTKGCKRKTN	20190709_HepG2_LPS_SILAC_KacIP_CID_120min_AS_3rd	413
K7EL96	Perilipin-3	PLIN3	1	95.477	1	K	_GAVQSGVDK(ac)TK_	133	9	K7EL96_133	2	0.24011	1.1069	-	-	1	AVQSGVDKTKSVVTG	200719_HepG2_LPS_Kac_15cm_ExSen_2hr_ooo	2915
B9A058	3-hydroxyisobutyryl-CoA hydrolase, mitochondrial	HIBCH	1	185.3	1	K	_AVLIDK(ac)DQSPK_	130	6	B9A058_130	2	0.34708	1.1004	-	-	5	VRAVLIDKDQSPKWK	20190709_HepG2_LPS_SILAC_KacIP_CID_120min_AS_1st	8880
J3QRP6	Ezrin-radixin-moesin-binding phosphoprotein 50	SLC9A3R1	1	109.01	1	K	_GK(ac)LGQYIR_	34	2	J3QRP6_34	2	-0.56319	1.0962	-	-	5	HLHGEKGKLGQYIRL	200719_HepG2_LPS_Kac_15cm_ExSen_2hr_ooo	7698
E7EWM1	Nuclear receptor coactivator 2	NCOA2	1	99.815	1	K	_LIAM(ox)K(ac)TEK_	785	5	E7EWM1_785	2	-0.061223	1.0947	-	-	2	NTKLIAMKTEKEEMS	20200603_LPS_SILAC_Kac_IP_Combine_120min	1383
Q9NPI1	Bromodomain-containing protein 7	BRD7	1	85.744	1	K	_ESGGK(ac)LTR_	328	5	Q9NPI1_328	2	0.76464	1.0945	-	-	1	IVKESGGKLTRRLVN	200719_HepG2_LPS_Kac_15cm_ExSen_2hr_ooo	2548
A0A087WY81	60S ribosomal protein L17	RPL17	1	43.761	1	K	_YSLDPENPTK(ac)SCK_	13	10	A0A087WY81_13	2	-0.62606	1.0923	-	-	1	LDPENPTKSCKSRGS	200719_HepG2_LPS_Kac_15cm_ExSen_2hr_ooo	7833
J3KMX5	40S ribosomal protein S13	RPS13	1	109.55	1	K	_MHAPGK(ac)GLSQSALPYRR_	9	6	J3KMX5_9	4	0.35733	1.0877	-	-	8	GRMHAPGKGLSQSAL	20190617_HepG2_LPS_SILAC_KacIP_CID_120min_AS_2nd	13150
Q5H9M0	PWWP domain-containing DNA repair factor 3B	PWWP3B	1	56.746	1	K	_FAPPLSPLSSDM(ox)LIM(ox)PK(ac)ALK_	252	17	Q5H9M0_252	3	3.5731	1.0862	-	-	1	SDMLIMPKALKEESE	20190709_HepG2_LPS_SILAC_KacIP_CID_120min_AS_2nd	18939
H0Y2V1	Microtubule-associated protein	MAP4	1	61.78	1	K	_IESQK(ac)LNFK_	388	5	H0Y2V1_388	2	1.0513	1.0838	-	-	1	DVKIESQKLNFKEKA	200719_HepG2_LPS_Kac_15cm_ExSen_2hr_ooo	7534
Q86UU0	B-cell CLL/lymphoma 9-like protein	BCL9L	1	149.9	1;2	K	_LTNHGK(ac)TGNGGAQSQHQNVNQGPTCNVGSK(ac)GVGAGNHGAK_	49	6	Q86UU0_49	5	-0.46876	1.0773	-	-	9	NKLTNHGKTGNGGAQ	20200603_LPS_SILAC_Kac_IP_Combine_120min	1607
H0YLP6	60S ribosomal protein L28	RPL28	1	51.726	1	K	_QTYSTEPNNLK(ac)AR_	33	11	H0YLP6_33	2	2.6659	1.0771	-	-	1	STEPNNLKARNSFRY	200719_HepG2_LPS_Kac_15cm_ExSen_2hr_ooo	5750
B5MBX1	E3 ubiquitin-protein ligase Jade-2	JADE2	1	161.48	1;2	K	_LPSSTK(ac)SGWPR_	38	6	B5MBX1_38	2	0.8532	1.0759	-	-	6	SKLPSSTKSGWPRQN	20190613_HepG2_LPS_SILAC_KacIP_CID_120min_AS_1st-1	12880
B1AK63	Chromatin modification-related protein MEAF6	MEAF6	1	322.23	1;2	K	_YLTNQK(ac)NSNSK(ac)NDR_	47	6	B1AK63_47	2	0.32172	1.0729	-	-	10	DRYLTNQKNSNSKND	20200603_LPS_SILAC_Kac_IP_Combine_120min	766
O95696	Bromodomain-containing protein 1	BRD1	1	99.161	1	K	_HPSSPCSVK(ac)HSPTR_	23	9	O95696_23	3	-0.19275	1.07	-	-	10	PSSPCSVKHSPTRET	20190617_HepG2_LPS_SILAC_KacIP_CID_120min_AS_2nd	1367
E5RIU6	Cyclin-dependent kinase 1	CDK1	1	152.7	1	K	_TTGQVVAM(ox)K(ac)K_	33	9	E5RIU6_33	2	-1.4223	1.069	-	-	6	TGQVVAMKKIRLESE	20200603_LPS_SILAC_Kac_IP_Combine_120min	1657
B4DKA4	Elongator complex protein 3	ELP3	1	86.258	1	K	_DSGFK(ac)VVAHMMPDLPNVGLER_	208	5	B4DKA4_208	3	0.23525	1.0686	-	-	3	LAKDSGFKVVAHMMP	20190709_HepG2_LPS_SILAC_KacIP_CID_120min_AS_1st	31220
Q86UU0	B-cell CLL/lymphoma 9-like protein	BCL9L	1	98.943	1;2	K	_NPQAGVPPFSSLK(ac)GK(ac)VK_	108	13	Q86UU0_108	2	0.12301	1.0651	-	-	5	VPPFSSLKGKVKRDR	20190617_HepG2_LPS_SILAC_KacIP_CID_120min_AS_1st	17736
Q147X3	N-alpha-acetyltransferase 30	NAA30	1	276.14	1	K	_LITK(ac)DLSEPYSIYTYR_	233	4	Q147X3_233	3	0.3036	1.0608	-	-	20	DIMRLITKDLSEPYS	20190613_HepG2_LPS_SILAC_KacIP_CID_120min_AS_2nd-1	23004
B9A053	pre-mRNA 3' end-processing protein WDR33	WDR33	1	150.7	1	K	_RPDFAQQQAM(ox)QQLTFDGK(ac)R_	46	18	B9A053_46	3	0.57026	1.0597	-	-	5	QQLTFDGKRMRKAVN	20200603_LPS_SILAC_Kac_IP_Combine_120min	4614
E9PL10	Transcription factor BTF3	BTF3L4	1	145.65	1	K	_IGGK(ac)GTAR_	18	4	E9PL10_18	2	-0.88894	1.0593	-	-	1	AQVRIGGKGTARRKK	200719_HepG2_LPS_Kac_15cm_ExSen_2hr_ooo	2174
Q09472	Histone acetyltransferase p300	EP300	1	361.76	1;2	K	_EENTSNESTDVTK(ac)GDSK(ac)NAK_	1542	13	Q09472_1542	3	-0.25328	1.0554	-	-	14	NESTDVTKGDSKNAK	20200603_LPS_SILAC_Kac_IP_Combine_120min	1747
C9JDV8	Protein NipSnap homolog 1	NIPSNAP1	0.999348	84.375	1	K	_TYK(ac)LKPGTMIEWGNNWAR_	56	3	C9JDV8_56	3	-0.29124	1.0534	-	-	2	IYELRTYKLKPGTMI	20190709_HepG2_LPS_SILAC_KacIP_CID_120min_AS_1st	23961
Q92613	Protein Jade-3	JADE3	1	176.18	1;2	K	_SK(ac)IPNEHK_	32	2	Q92613_32	3	0.037629	1.0507	-	-	10	SMYRIKSKIPNEHKK	20200603_LPS_SILAC_Kac_IP_Combine_120min	1515
Q09472	Histone acetyltransferase p300	EP300	1	361.76	1;2	K	_EENTSNESTDVTK(ac)GDSK(ac)NAK_	1546	17	Q09472_1546	3	-0.25328	1.05	-	-	1	DVTKGDSKNAKKKNN	20200603_LPS_SILAC_Kac_IP_Combine_120min	1747
E9PEW0	Ubiquitin carboxyl-terminal hydrolase	USP36	1	55.261	1	K	_ACLNGCAK(ac)LDR_	230	8	E9PEW0_230	2	-0.41038	1.0456	-	-	1	ACLNGCAKLDRQTQA	200719_HepG2_LPS_Kac_15cm_ExSen_2hr_ooo	6070
F8W1N5	Nascent polypeptide-associated complex subunit alpha	NACA	1	253.34	1	K	_IEDLSQQAQLAAAEK(ac)FK_	63	15	F8W1N5_63	2	0.32761	1.0453	-	-	22	AQLAAAEKFKVQGEA	20190617_HepG2_LPS_SILAC_KacIP_CID_120min_AS_1st	24474
P55201	Peregrin	BRPF1	1	107.57	1	K	_TSVLFSK(ac)K_	896	7	P55201_896	2	0.30017	1.0419	-	-	1	RTSVLFSKKNPKTAG	200719_HepG2_LPS_Kac_15cm_ExSen_2hr_ooo	7188
A0A3B3IU93	Histone acetyltransferase	KAT6B	1	99.219	1	K	_LAVTDPTRPGATTK(ac)ITTTSTYISASTLK_	412	14	A0A3B3IU93_412	3	-0.022567	1.041	-	-	2	TRPGATTKITTTSTY	20190617_HepG2_LPS_SILAC_KacIP_CID_120min_AS_1st	24243
Q92613	Protein Jade-3	JADE3	1	200.97	1	K	_NTEDLQCYVK(ac)PTK_	735	10	Q92613_735	2	-0.31893	1.0401	-	-	8	EDLQCYVKPTKNMSP	20190709_HepG2_LPS_SILAC_KacIP_CID_120min_AS_3rd	12522
G3V295	Proteasome subunit alpha type	PSMA6	1	61.11	1	K	_QTESTSFLEK(ac)K_	181	10	G3V295_181	2	-0.59258	1.0383	-	-	1	ESTSFLEKKVKKKFD	200719_HepG2_LPS_Kac_15cm_ExSen_2hr_ooo	7245
Q5T5U6	Selenide, water dikinase 1	SEPHS1	1	61.344	1	K	_FTELK(ac)GTGCK_	27	5	Q5T5U6_27	2	-0.97033	1.0373	-	-	1	LTRFTELKGTGCKVP	200719_HepG2_LPS_Kac_15cm_ExSen_2hr_ooo	5277
B4DDC6	Prostaglandin E synthase 3	PTGES3	1	92.781	1	K	_(ac)MQPASAK(ac)WYDRR_	7	7	B4DDC6_7	2	0.32236	1.0284	-	-	2	MQPASAKWYDRRDY	20190709_HepG2_LPS_SILAC_KacIP_CID_120min_AS_2nd	14693
A0A0M3HER2	Centromere protein V	CENPV	1	168.23	1	K	_SSAAAK(ac)LR_	11	6	A0A0M3HER2_11	2	-0.53983	1.0278	-	-	1	SRSSAAAKLRGQKRS	200719_HepG2_LPS_Kac_15cm_ExSen_2hr_ooo	2947
Q9UMN6	Histone-lysine N-methyltransferase 2B	KMT2B	1	123.74	1	K	_RGK(ac)VEAAGPGGESEPTGSGGTLAHTPR_	926	3	Q9UMN6_926	4	-0.5425	1.0229	-	-	12	PSRSRRGKVEAAGPG	200719_HepG2_LPS_Kac_15cm_ExSen_2hr_ooo	6423
Q6P4R8	Nuclear factor related to kappa-B-binding protein	NFRKB	1	247.51	1	K	_LIAGNK(ac)PVSFLTAQQLQQLQQQGQATQVR_	1237	6	Q6P4R8_1237	4	0.73518	1.0213	-	-	16	TKLIAGNKPVSFLTA	20200603_LPS_SILAC_Kac_IP_Combine_120min	9776
Q09472	Histone acetyltransferase p300	EP300	1	196.11	2	K	_TSK(ac)NK(ac)SSLSR_	1558	3	Q09472_1558	2	0.34024	1.0204	-	-	9	KNNKKTSKNKSSLSR	200719_HepG2_LPS_Kac_15cm_ExSen_2hr_ooo	3405
Q8NEZ4	Histone-lysine N-methyltransferase 2C	KMT2C	1	142.89	1	K	_DVSYQGGK(ac)SIK_	758	8	Q8NEZ4_758	2	-0.80593	1.0159	-	-	5	DVSYQGGKSIKLSSE	20190709_HepG2_LPS_SILAC_KacIP_CID_120min_AS_1st	7429
I3L0K2	Thioredoxin domain-containing protein 17	TXNDC17	1	201.14	1	K	_DAGGK(ac)SWCPDCVQAEPVVR_	40	5	I3L0K2_40	3	-0.78172	1.0145	-	-	6	GSKDAGGKSWCPDCV	20190709_HepG2_LPS_SILAC_KacIP_CID_120min_AS_1st	18323
F8W7S5	Ribosome-binding protein 1	RRBP1	1	95.9	1	K	_SK(ac)CEELSGLHGQLQEAR_	273	2	F8W7S5_273	3	-0.2874	1.0131	-	-	6	SEAEVRSKCEELSGL	200719_HepG2_LPS_Kac_15cm_ExSen_2hr_ooo	8367
Q8NEZ4	Histone-lysine N-methyltransferase 2C	KMT2C	1	92.611	1	K	_IGMGK(ac)PAITK_	827	5	Q8NEZ4_827	2	-0.63162	1.011	-	-	8	TPKIGMGKPAITKRK	20190613_HepG2_LPS_SILAC_KacIP_CID_120min_AS_1st-1	8845
B1AK63	Chromatin modification-related protein MEAF6	MEAF6	1	143.36	1	K	_LFSK(ac)SSVTSAAAVSALAGVQDQLIEK_	69	4	B1AK63_69	3	1.2455	1.0085	-	-	9	EAERLFSKSSVTSAA	20190709_HepG2_LPS_SILAC_KacIP_CID_120min_AS_3rd	31907
Q5VVC8	60S ribosomal protein L11	RPL11	1	93.096	1	K	_AEEILEK(ac)GLK_	74	7	Q5VVC8_74	2	1.0083	1.0058	-	-	3	KAEEILEKGLKVREY	200719_HepG2_LPS_Kac_15cm_ExSen_2hr_ooo	9166
A0A286YF34	D-3-phosphoglycerate dehydrogenase	PHGDH	1	135.61	1	K	_SATK(ac)VTADVINAAEK_	58	4	A0A286YF34_58	2	1.645	1.0051	-	-	2	LIVRSATKVTADVIN	20190709_HepG2_LPS_SILAC_KacIP_CID_120min_AS_1st	15472
H0Y6I7	Lysine-specific demethylase 6A	KDM6A	1	87.319	1	K	_ANNNVGTGTCDK(ac)VNNIHPAVHTK_	397	12	H0Y6I7_397	4	-0.052121	1.0033	-	-	6	VGTGTCDKVNNIHPA	20200603_LPS_SILAC_Kac_IP_Combine_120min	2253
Q99525	Histone H4-like protein type G	H4C7	1	132.08	1;2	K	_GLGK(ac)GGAK_	13	4	Q99525_13	2	-0.2541	1.0023	-	-	7	KAGKGLGKGGAKCHR	20190613_HepG2_LPS_SILAC_KacIP_CID_120min_AS_2nd-2	687
R4GN99	Peptidyl-prolyl cis-trans isomerase	PPIF	1	59.55	1	K	_VIPSFMCQAGDFTNHNGTGGK(ac)SIYGSR_	118	21	R4GN99_118	3	0.1351	1.002	-	-	1	NHNGTGGKSIYGSRF	20190709_HepG2_LPS_SILAC_KacIP_CID_120min_AS_1st	22892
Q5T0R7	Adenylyl cyclase-associated protein 1	CAP1	1	71.933	1	K	_HAEMVHTGLK(ac)LER_	81	10	Q5T0R7_81	3	-0.38078	1.0006	-	-	2	EMVHTGLKLERALLV	20190709_HepG2_LPS_SILAC_KacIP_CID_120min_AS_3rd	7686
E9PIM3	Integrator complex subunit 4	INTS4	1	109.6	1	K	_VVQPQEEIATK(ac)K_	26	11	E9PIM3_26	2	-0.7371	0.99915	-	-	9	PQEEIATKKLRLTKP	200719_HepG2_LPS_Kac_15cm_ExSen_2hr_ooo	6313
Q3BDU5	Prelamin-A/C	LMNA	1	151.44	1	K	_K(ac)LESTESR_	420	1	Q3BDU5_420	2	0.59111	0.99824	-	-	1	GSVTKKRKLESTESR	200719_HepG2_LPS_Kac_15cm_ExSen_2hr_ooo	2338
J3QRQ2	L-xylulose reductase	DCXR	1	104.44	1	K	_AK(ac)TM(ox)LNR_	37	2	J3QRQ2_37	2	0.69355	0.99811	-	-	3	WSDPHKAKTMLNRIP	20190617_HepG2_LPS_SILAC_KacIP_CID_120min_AS_1st	3399
D6RHU2	NAD	NNT	1	127.02	1	K	_EIFQNEK(ac)R_	70	7	D6RHU2_70	2	-0.44014	0.99762	-	-	1	KEIFQNEKRVALSPA	200719_HepG2_LPS_Kac_15cm_ExSen_2hr_ooo	5147
F8VY04	Nucleoside-diphosphate kinase	AK2	1	61.593	1	K	_SDDNEK(ac)ALK_	139	6	F8VY04_139	2	0.32638	0.99761	-	-	1	RRSDDNEKALKIRLQ	200719_HepG2_LPS_Kac_15cm_ExSen_2hr_ooo	2863
Q9UNL4	Inhibitor of growth protein 4	ING4	1	221.47	2	K	_QIESSDYDSSSSK(ac)GK(ac)K_	127	13	Q9UNL4_127	2	1.5929	0.99545	-	-	4	DYDSSSSKGKKKGRT	20200603_LPS_SILAC_Kac_IP_Combine_120min	1822
Q9UNL4	Inhibitor of growth protein 4	ING4	1	221.47	2	K	_QIESSDYDSSSSK(ac)GK(ac)K_	129	15	Q9UNL4_129	2	1.5929	0.99545	-	-	4	DSSSSKGKKKGRTQK	20200603_LPS_SILAC_Kac_IP_Combine_120min	1822
E5RGH3	Polyadenylate-binding protein 1	PABPC1	1	108.26	1	K	_NLDK(ac)SIDNK_	63	4	E5RGH3_63	2	0.40654	0.99462	-	-	1	IFIKNLDKSIDNKAL	200719_HepG2_LPS_Kac_15cm_ExSen_2hr_ooo	4514
O14686	Histone-lysine N-methyltransferase 2D	KMT2D	1	136.02	1	K	_LVTEQQSK(ac)IQK_	3573	8	O14686_3573	2	0.40163	0.9883	-	-	1	LVTEQQSKIQKQLDQ	200719_HepG2_LPS_Kac_15cm_ExSen_2hr_ooo	4546
H0YJS8	26S proteasome regulatory subunit 10B	PSMC6	1	200.81	1	K	_VVSSSIVDK(ac)YIGESAR_	166	9	H0YJS8_166	3	-0.72293	0.98822	-	-	14	VSSSIVDKYIGESAR	20190613_HepG2_LPS_SILAC_KacIP_CID_120min_AS_2nd-1	18875
K7EMN2	6-phosphogluconate dehydrogenase, decarboxylating	PGD	1	146.27	1	K	_TVSK(ac)VDDFLANEAK_	25	4	K7EMN2_25	2	0.88545	0.98411	-	-	4	AFNRTVSKVDDFLAN	20190709_HepG2_LPS_SILAC_KacIP_CID_120min_AS_1st	19544
I3L0W4	Diamine acetyltransferase 2	SAT2	1	225.21	1	K	_LSDQVK(ac)ISEEALR_	35	6	I3L0W4_35	2	0.81404	0.98206	-	-	11	EKLSDQVKISEEALR	20200603_LPS_SILAC_Kac_IP_Combine_120min	4972
Q8TAF3	WD repeat-containing protein 48	WDR48	1	135.38	1	K	_IPFYLQPHASSGAK(ac)TLK_	578	14	Q8TAF3_578	3	0.32088	0.97751	-	-	2	PHASSGAKTLKKDRL	20200603_LPS_SILAC_Kac_IP_Combine_120min	5356
B4E1S2	Annexin	ANXA4	1	80.24	1	K	_(ac)AM(ox)ATK(ac)GGTVK_	6	5	B4E1S2_6	2	0.23432	0.97738	-	-	1	MAMATKGGTVKAA	200719_HepG2_LPS_Kac_15cm_ExSen_2hr_ooo	3998
B1AL33	E3 ubiquitin-protein ligase UHRF2	UHRF2	1	163.02	1	K	_TIDGSK(ac)TCTIEDVSR_	12	6	B1AL33_12	2	0.7272	0.97582	-	-	1	VRTIDGSKTCTIEDV	20190709_HepG2_LPS_SILAC_KacIP_CID_120min_AS_1st	13473
A0A2R8Y7S8	DNA mismatch repair protein Msh2	MSH2	1	157.7	1	K	_YM(ox)GPAGAK(ac)NLQSVVLSK_	73	8	A0A2R8Y7S8_73	2	0.31932	0.97414	-	-	7	YMGPAGAKNLQSVVL	20200603_LPS_SILAC_Kac_IP_Combine_120min	5944
H3BT22	Origin recognition complex subunit 6	ORC6	1	51.135	1	K	_IVVEAPAK(ac)EM(ox)EK_	161	8	H3BT22_161	2	-0.37295	0.97411	-	-	1	IVVEAPAKEMEKVEE	200719_HepG2_LPS_Kac_15cm_ExSen_2hr_ooo	6472
A0A075B6H4	Cysteine-rich protein 2-binding protein	KAT14	1	66.004	1	K	_STSSTPVK(ac)FISR_	291	8	A0A075B6H4_291	2	-0.26378	0.97307	-	-	1	STSSTPVKFISRGRR	200719_HepG2_LPS_Kac_15cm_ExSen_2hr_ooo	8630
Q86UU0	B-cell CLL/lymphoma 9-like protein	BCL9L	1	92.427	2	K	_NPQAGVPPFSSLK(ac)GK(ac)VK_	110	15	Q86UU0_110	2	0.12301	0.97172	-	-	6	PFSSLKGKVKRDRSV	20190617_HepG2_LPS_SILAC_KacIP_CID_120min_AS_2nd	22433
Q6A1A2	Putative 3-phosphoinositide-dependent protein kinase 2	PDPK2P	1	160.46	1	K	_LEYDFPEK(ac)FFPK_	277	8	Q6A1A2_277	2	-0.15314	0.9717	-	-	6	LEYDFPEKFFPKARD	20190709_HepG2_LPS_SILAC_KacIP_CID_120min_AS_3rd	28758
Q92613	Protein Jade-3	JADE3	1	213.41	1	K	_TPSSECYHGQSLGK(ac)PLVLQAALHGQSSIGNGK_	638	14	Q92613_638	4	-0.65621	0.97152	-	-	10	YHGQSLGKPLVLQAA	20200603_LPS_SILAC_Kac_IP_Combine_120min	7207
O00238	Bone morphogenetic protein receptor type-1B	BMPR1B	1	81.565	1	K	_TLAKMSESQDIK(ac)L_	501	12	O00238_501	3	-3.7317	0.96668	-	-	3	MSESQDIKL	20190709_HepG2_LPS_SILAC_KacIP_CID_120min_AS_2nd	15856
Q92585	Mastermind-like protein 1	MAML1	1	143.58	1	K	_GTLNPGLTK(ac)PPVPR_	822	9	Q92585_822	2	-1.1964	0.96594	-	-	10	TLNPGLTKPPVPRVS	20190613_HepG2_LPS_SILAC_KacIP_CID_120min_AS_1st-1	14400
H0Y561	26S proteasome non-ATPase regulatory subunit 4	PSMD4	0.769545	49.535	1	K	_NAM(ox)GSLASQATK(ac)DGKK_	72	12	H0Y561_72	3	-1.694	0.96218	-	-	1	SLASQATKDGKKDKK	200719_HepG2_LPS_Kac_15cm_ExSen_2hr_ooo	3121
H3BN84	SAGA-associated factor 29	SGF29	1	67.113	1	K	_YVVACK(ac)EPK_	85	6	H3BN84_85	2	-0.45477	0.96087	-	-	1	QRYVVACKEPKKK	200719_HepG2_LPS_Kac_15cm_ExSen_2hr_ooo	4860
E7EWM1	Nuclear receptor coactivator 2	NCOA2	1	59.227	1	K	_ECPDQLGPSPK(ac)R_	31	11	E7EWM1_31	2	-0.58098	0.96066	-	-	1	DQLGPSPKRNTEKRN	20200603_LPS_SILAC_Kac_IP_Combine_120min	2194
K7ESD6	LIM and SH3 domain protein 1	LASP1	1	74.173	1	K	_M(ox)TLNM(ox)K(ac)NYK_	42	6	K7ESD6_42	2	-1.0042	0.96001	-	-	1	CKMTLNMKNYKGYEK	200719_HepG2_LPS_Kac_15cm_ExSen_2hr_ooo	3566
E9PNS2	Histone-binding protein RBBP4	RBBP4	1	192.4	1	K	_(ac)ADK(ac)EAAFDDAVEER_	4	3	E9PNS2_4	2	0.38676	0.95887	-	-	10	MADKEAAFDDA	20190617_HepG2_LPS_SILAC_KacIP_CID_120min_AS_1st	24030
H7C2G8	Protein SON	SON	1	200.81	1	K	_RLTDLDK(ac)AQLLEIAK_	116	7	H7C2G8_116	2	0.30087	0.95609	-	-	16	KRLTDLDKAQLLEIA	20190709_HepG2_LPS_SILAC_KacIP_CID_120min_AS_1st	23457
A0A087WYS6	Proteasome endopeptidase complex	PSMA8	1	112.04	1	K	_SVAK(ac)LQDER_	28	4	A0A087WYS6_28	2	1.0358	0.95451	-	-	1	VEKKSVAKLQDERTV	200719_HepG2_LPS_Kac_15cm_ExSen_2hr_ooo	4149
R4GN99	Peptidyl-prolyl cis-trans isomerase	PPIF	1	65.118	1	K	_GSGDPSSSSSSGNPLVYLDVDANGK(ac)PLGR_	57	25	R4GN99_57	3	0.80439	0.95443	-	-	1	LDVDANGKPLGRVVL	20190709_HepG2_LPS_SILAC_KacIP_CID_120min_AS_1st	27039
C9JXR7	Caspase-3	CASP3	1	73.834	1	K	_(ac)M(ox)ENTENSVDSK(ac)SIK_	11	11	C9JXR7_11	2	-0.14496	0.95425	-	-	1	TENSVDSKSIKNLEP	200719_HepG2_LPS_Kac_15cm_ExSen_2hr_ooo	7296
A0A2R8Y857	Treacle protein	TCOF1	1	153.32	1	K	_TVANLLSGK(ac)SPR_	155	9	A0A2R8Y857_155	2	-3.3977	0.9523	-	-	4	VANLLSGKSPRKSAE	20200603_LPS_SILAC_Kac_IP_Combine_120min	4262
Q5LJB0	Ubiquitin carboxyl-terminal hydrolase	UCHL5	1	190.8	1	K	_TSAK(ac)EEDAFHFVSYVPVNGR_	149	4	Q5LJB0_149	3	0.85032	0.94885	-	-	11	FDTKTSAKEEDAFHF	20200603_LPS_SILAC_Kac_IP_Combine_120min	7669
F8WBU2	Choline-phosphate cytidylyltransferase A	PCYT1A	1	101.53	1	K	_(ac)M(ox)DAQCSAK(ac)VNAR_	8	8	F8WBU2_8	2	-0.28924	0.94782	-	-	1	MDAQCSAKVNARKRR	200719_HepG2_LPS_Kac_15cm_ExSen_2hr_ooo	5201
C9J7T7	Nuclear receptor corepressor 2	NCOR2	1	149.59	1	K	_TQSK(ac)PFSIQELELR_	1574	4	C9J7T7_1574	2	0.22184	0.94608	-	-	6	HREKTQSKPFSIQEL	20190709_HepG2_LPS_SILAC_KacIP_CID_120min_AS_1st	24446
Q8NEZ4	Histone-lysine N-methyltransferase 2C	KMT2C	1	69.92	2	K	_TLVLSDK(ac)HSPQK(ac)K_	2814	12	Q8NEZ4_2814	3	-0.23054	0.94505	-	-	2	SDKHSPQKKSTVTNE	200719_HepG2_LPS_Kac_15cm_ExSen_2hr_ooo	5779
I3L2T8	Nuclear distribution protein nudE homolog 1	NDE1	1	143.04	1	K	_K(ac)VGALESK_	56	1	I3L2T8_56	2	-0.99515	0.94202	-	-	2	IVGDLLRKVGALESK	20200603_LPS_SILAC_Kac_IP_Combine_120min	563
Q09472	Histone acetyltransferase p300	EP300	1	166.34	1	K	_KLEFSPQTLCCYGK(ac)QLCTIPR_	1180	14	Q09472_1180	3	-1.1157	0.9417	-	-	8	QTLCCYGKQLCTIPR	20200603_LPS_SILAC_Kac_IP_Combine_120min	8673
H3BNW0	THUMP domain-containing protein 1	THUMPD1	1	126.71	1	K	_(ac)AAPAQQTTQPGGGK(ac)R_	15	14	H3BNW0_15	2	0.12518	0.94121	-	-	1	TTQPGGGKRKGKAQY	200719_HepG2_LPS_Kac_15cm_ExSen_2hr_ooo	4685
F5GXF9	AF4/FMR2 family member 1	AFF1	1	85.355	1	K	_QTVGTK(ac)QPK_	603	6	F5GXF9_603	2	-0.059656	0.94062	-	-	1	QRQTVGTKQPKKPVK	200719_HepG2_LPS_Kac_15cm_ExSen_2hr_ooo	2295
P55769	NHP2-like protein 1	SNU13	1	225.21	1	K	_K(ac)LLDLVQQSCNYK_	21	1	P55769_21	2	-0.18906	0.93761	-	-	7	ADAHLTKKLLDLVQQ	20190709_HepG2_LPS_SILAC_KacIP_CID_120min_AS_1st	20000
A5PLL3	Histone acetyltransferase	KAT6A	1	63.091	1	K	_QNTVSK(ac)GPFSK_	350	6	A5PLL3_350	2	-0.56315	0.93491	-	-	1	KKQNTVSKGPFSKVR	200719_HepG2_LPS_Kac_15cm_ExSen_2hr_ooo	5899
F8VQQ8	Ubiquitin-conjugating enzyme E2 N	UBE2N	1	165.89	1	K	_ICLDILK(ac)DK_	29	7	F8VQQ8_29	2	-0.28506	0.93091	-	-	8	RICLDILKDKWSPAL	20190709_HepG2_LPS_SILAC_KacIP_CID_120min_AS_3rd	28505
P54198	Protein HIRA	HIRA	1	130.36	1	K	_ATYIGPSTVFGSSGK(ac)LANVEQWR_	114	15	P54198_114	3	0.10812	0.92924	-	-	5	TVFGSSGKLANVEQW	20190613_HepG2_LPS_SILAC_KacIP_CID_120min_AS_2nd-1	27876
K7EMT0	Splicing factor 3A subunit 2	SF3A2	1	164.06	1	K	_(ac)M(ox)DFQHRPGGK(ac)TGSGGVASSSESNR_	10	10	K7EMT0_10	3	-0.37656	0.92803	-	-	3	FQHRPGGKTGSGGVA	20190709_HepG2_LPS_SILAC_KacIP_CID_120min_AS_1st	10443
E7EVL6	Replication initiator 1	REPIN1	1	217.67	1	K	_LLSGPSQESPQTLGK(ac)ESR_	33	15	E7EVL6_33	2	-0.3623	0.92589	-	-	4	ESPQTLGKESRGLRQ	20190709_HepG2_LPS_SILAC_KacIP_CID_120min_AS_1st	12821
G3V279	Enhancer of rudimentary homolog	ERH	1	83.877	1	K	_(ac)SHTILLVQPTK(ac)RPEGR_	12	11	G3V279_12	3	0.2342	0.92212	-	-	3	ILLVQPTKRPEGRTY	20190709_HepG2_LPS_SILAC_KacIP_CID_120min_AS_1st	13813
R4GN99	Peptidyl-prolyl cis-trans isomerase	PPIF	1	57.267	1	K	_ADVVPK(ac)TAENFR_	73	6	R4GN99_73	2	0.55197	0.92118	-	-	2	LKADVVPKTAENFRA	200719_HepG2_LPS_Kac_15cm_ExSen_2hr_ooo	8562
Q9H0U4	Ras-related protein Rab-1B	RAB1B	1	94.61	1	K	_TIK(ac)LQIWDTAGQER_	58	3	Q9H0U4_58	2	0.21388	0.91917	-	-	1	ELDGKTIKLQIWDTA	20190617_HepG2_LPS_SILAC_KacIP_CID_120min_AS_2nd	22634
H0YGN8	START domain-containing protein 10	STARD10	1	41.996	1	K	_WVVNK(ac)SSQFLAPK_	49	5	H0YGN8_49	2	1.1065	0.91826	-	-	1	LPKWVVNKSSQFLAP	200719_HepG2_LPS_Kac_15cm_ExSen_2hr_ooo	12860
Q8NEZ4	Histone-lysine N-methyltransferase 2C	KMT2C	1	156.08	1	K	_TEVLSPNSK(ac)VESK_	2832	9	Q8NEZ4_2832	2	1.3947	0.91689	-	-	7	EVLSPNSKVESKCET	200719_HepG2_LPS_Kac_15cm_ExSen_2hr_ooo	6272
Q86UU0	B-cell CLL/lymphoma 9-like protein	BCL9L	1	149.9	2	K	_LTNHGK(ac)TGNGGAQSQHQNVNQGPTCNVGSK(ac)GVGAGNHGAK_	73	30	Q86UU0_73	5	-0.46876	0.91659	-	-	6	PTCNVGSKGVGAGNH	20200603_LPS_SILAC_Kac_IP_Combine_120min	1607
B5MBX1	E3 ubiquitin-protein ligase Jade-2	JADE2	1	44.925	1	K	_M(ox)EPITK(ac)ISHIPASR_	298	6	B5MBX1_298	3	-0.54985	0.91556	-	-	1	EKMEPITKISHIPAS	200719_HepG2_LPS_Kac_15cm_ExSen_2hr_ooo	8181
A0A1B0GVU9	Glutaminyl-tRNA synthetase	QARS1	1	64.104	1	K	_LVM(ox)EDGK(ac)M(ox)DPVAYR_	356	7	A0A1B0GVU9_356	2	-0.083084	0.91386	-	-	1	KLVMEDGKMDPVAYR	200719_HepG2_LPS_Kac_15cm_ExSen_2hr_ooo	7817
K7EK07	Histone H3	H3-3B	0.966416	77.776	1	K	_SAPSTGGVK(ac)KPHR_	37	9	K7EK07_37	2	-0.098337	0.91365	-	-	1	APSTGGVKKPHRYRP	20200603_LPS_SILAC_Kac_IP_Combine_120min	472
H3BRH3	Zinc finger CCCH domain-containing protein 18	ZC3H18	1	131.27	1	K	_SSQQPSTPQQAPPGQPQQGTFVAHK(ac)EIK_	57	25	H3BRH3_57	3	1.0994	0.91323	-	-	2	QGTFVAHKEIKLTLL	20190709_HepG2_LPS_SILAC_KacIP_CID_120min_AS_1st	12291
F8VX16	Sodium-dependent neutral amino acid transporter B	SLC6A15	1	71.806	1	K	_(ac)M(ox)FTPK(ac)LEIM(ox)LEPK_	5	5	F8VX16_5	3	-2.0115	0.91255	-	-	1	MFTPKLEIMLEP	20190613_HepG2_LPS_SILAC_KacIP_CID_120min_AS_1st-1	8070
Q86UU0	B-cell CLL/lymphoma 9-like protein	BCL9L	1	83.423	2	K	_GHCPPAPAK(ac)PMHPENK(ac)LTNHGK_	43	16	Q86UU0_43	4	-0.77708	0.91254	-	-	3	KPMHPENKLTNHGKT	20190709_HepG2_LPS_SILAC_KacIP_CID_120min_AS_3rd	8128
Q9UMZ2	Synergin gamma	SYNRG	1	48.568	1	K	_ALPSM(ox)DK(ac)YAVFK_	513	7	Q9UMZ2_513	2	-1.337	0.90355	-	-	1	KALPSMDKYAVFKGI	200719_HepG2_LPS_Kac_15cm_ExSen_2hr_ooo	11250
A0A087WXQ8	Proteasome chain 13	PSMB3	1	118.61	1	K	_LNLYELK(ac)EGR_	77	7	A0A087WXQ8_77	2	-0.34933	0.90102	-	-	4	RLNLYELKEGRQIKP	20190709_HepG2_LPS_SILAC_KacIP_CID_120min_AS_3rd	19004
H7C2N3	Pre-mRNA-processing factor 40 homolog A	PRPF40A	1	56.569	1	K	_SDSGK(ac)PYYYNSQTK_	122	5	H7C2N3_122	2	-0.31382	0.89768	-	-	1	GKPYYYNSQTKESRW	200719_HepG2_LPS_Kac_15cm_ExSen_2hr_ooo	6022
Q9UBW7	Zinc finger MYM-type protein 2	ZMYM2	0.99181	58.123	1	K	_YQVSSLCGTDNEDKITTGK(ac)R_	1280	19	Q9UBW7_1280	3	-0.22566	0.89182	-	-	1	EDKITTGKRKHEDDE	200719_HepG2_LPS_Kac_15cm_ExSen_2hr_ooo	8179
E9PC52	Histone-binding protein RBBP7	RBBP7	1	173.44	1	K	_IECEIK(ac)INHEGEVNR_	110	6	E9PC52_110	3	-0.44195	0.89089	-	-	11	GKIECEIKINHEGEV	200719_HepG2_LPS_Kac_15cm_ExSen_2hr_ooo	6668
A0A2R8Y857	Treacle protein	TCOF1	1	78.95	1	K	_ASGK(ac)TSQVGAASAPAK_	219	4	A0A2R8Y857_219	2	-0.053882	0.88813	-	-	1	VEAKASGKTSQVGAA	200719_HepG2_LPS_Kac_15cm_ExSen_2hr_ooo	3342
Q02078	Myocyte-specific enhancer factor 2A	MEF2A	1	107.39	1	K	_ASPNLIGATGANSLGK(ac)VM(ox)PTK_	249	16	Q02078_249	3	0.7376	0.88801	-	-	1	TGANSLGKVMPTKSP	20200603_LPS_SILAC_Kac_IP_Combine_120min	6019
M0R054	SUMO-activating enzyme subunit 1	SAE1	1	95.981	1	K	_VSQGVEDGPDTK(ac)R_	131	12	M0R054_131	2	0.25487	0.88782	-	-	1	VEDGPDTKRAKLDSS	200719_HepG2_LPS_Kac_15cm_ExSen_2hr_ooo	3518
Q5T7F5	Cap-specific mRNA	CMTR1	1	51.726	1	K	_RTDPECTAPIK(ac)K_	14	11	Q5T7F5_14	3	0.15492	0.88321	-	-	1	PECTAPIKKQKKRVA	200719_HepG2_LPS_Kac_15cm_ExSen_2hr_ooo	3389
J3QT56	Huntingtin-interacting protein K	HYPK	1	190.34	1	K	_K(ac)HDSGAADLER_	35	1	J3QT56_35	3	-0.33171	0.88317	-	-	5	HDSGAADLERVTDYA	200719_HepG2_LPS_Kac_15cm_ExSen_2hr_ooo	2534
I3L0W4	Diamine acetyltransferase 2	SAT2	1	124.16	1	K	_ELAEFEK(ac)LSDQVK_	29	7	I3L0W4_29	2	0.57192	0.88182	-	-	3	RELAEFEKLSDQVKI	20200603_LPS_SILAC_Kac_IP_Combine_120min	7033
P62841	40S ribosomal protein S15	RPS15	1	86.794	1	K	_(ac)AEVEQK(ac)K_	7	6	P62841_7	2	-0.57016	0.87966	-	-	1	MAEVEQKKKRTFRK	200719_HepG2_LPS_Kac_15cm_ExSen_2hr_ooo	4353
H7BY36	RNA-binding protein EWS	EWSR1	1	138.66	1	K	_DFQGSK(ac)LK_	95	6	H7BY36_95	2	0.2462	0.87889	-	-	3	GKDFQGSKLKVSLAR	20200603_LPS_SILAC_Kac_IP_Combine_120min	6672
B3KPX4	2-hydroxyacyl-CoA lyase 1	HACL1	1	72.321	1	K	_SNEAASK(ac)ELASK_	124	7	B3KPX4_124	2	0.16291	0.87837	-	-	1	KSNEAASKELASKKS	200719_HepG2_LPS_Kac_15cm_ExSen_2hr_ooo	3615
O14686	Histone-lysine N-methyltransferase 2D	KMT2D	1	151.26	1	K	_LVESANEK(ac)AER_	3079	8	O14686_3079	2	0.42067	0.87292	-	-	1	LVESANEKAEREALL	200719_HepG2_LPS_Kac_15cm_ExSen_2hr_ooo	3564
A0A0A0MTR6	NADPH:adrenodoxin oxidoreductase, mitochondrial	FDXR	1	50.042	1	K	_TPQICVVGSGPAGFYTAQHLLK(ac)HPQAHVDIYEK_	59	22	A0A0A0MTR6_59	5	-0.33584	0.86946	-	-	1	YTAQHLLKHPQAHVD	20200603_LPS_SILAC_Kac_IP_Combine_120min	8363
K7EQA9	Hsp90 chaperone protein kinase-targeting subunit	CDC37	1	211.75	1	K	_LKELEVAEGGK(ac)AELER_	78	11	K7EQA9_78	3	-0.29404	0.86933	-	-	20	LEVAEGGKAELERLQ	20190617_HepG2_LPS_SILAC_KacIP_CID_120min_AS_1st	14926
C9J7L8	Acyl-coenzyme A thioesterase 9, mitochondrial	ACOT9	1	132.32	1	K	_EK(ac)YLTVQNTVR_	43	2	C9J7L8_43	2	-1.1535	0.86602	-	-	3	SEPELREKYLTVQNT	200719_HepG2_LPS_Kac_15cm_ExSen_2hr_ooo	8314
Q5HY92	Fidgetin	FIGN	1	61.409	1	K	_SAETSSLAFK(ac)PTK_	377	10	Q5HY92_377	2	0.035372	0.86354	-	-	1	ETSSLAFKPTKQLMS	200719_HepG2_LPS_Kac_15cm_ExSen_2hr_ooo	8068
Q09472	Histone acetyltransferase p300	EP300	1	88.504	1	K	_MEVDQPEPADTQPEDISESK(ac)VEDCK_	1001	20	Q09472_1001	3	0.21574	0.86293	-	-	3	PEDISESKVEDCKME	20190709_HepG2_LPS_SILAC_KacIP_CID_120min_AS_1st	19052
O75586	Mediator of RNA polymerase II transcription subunit 6	MED6	1	81.632	1;2	K	_NVQQTVSAK(ac)GPPEK(ac)R_	236	9	O75586_236	2	0.47234	0.85978	-	-	1	VQQTVSAKGPPEKRM	200719_HepG2_LPS_Kac_15cm_ExSen_2hr_ooo	4248
H0Y8U3	Exosome RNA helicase MTR4	MTREX	0.834645	79.346	1	K	_DVDFEGTDEPIFGK(ac)KPR_	34	14	H0Y8U3_34	3	0.39743	0.85443	-	-	1	TDEPIFGKKPRIEES	200719_HepG2_LPS_Kac_15cm_ExSen_2hr_ooo	12514
Q03111	Protein ENL	MLLT1	1	107.01	1	K	_AAFK(ac)EPK_	252	4	Q03111_252	2	0.37371	0.85282	-	-	6	PPPKAAFKEPKMALK	20190613_HepG2_LPS_SILAC_KacIP_CID_120min_AS_2nd-1	3677
Q8NEZ4	Histone-lysine N-methyltransferase 2C	KMT2C	1	69.92	2	K	_TLVLSDK(ac)HSPQK(ac)K_	2809	7	Q8NEZ4_2809	3	-0.23054	0.84644	-	-	1	KTLVLSDKHSPQKKS	200719_HepG2_LPS_Kac_15cm_ExSen_2hr_ooo	5779
H3BPS6	Serine/threonine-protein kinase SMG1	SMG1	1	118.73	1	K	_QLK(ac)EFIQQPENK_	41	3	H3BPS6_41	2	0.0029609	0.84624	-	-	3	LATVKQLKEFIQQPE	200719_HepG2_LPS_Kac_15cm_ExSen_2hr_ooo	9146
O14686	Histone-lysine N-methyltransferase 2D	KMT2D	1	95.477	1	K	_LASVLPEVK(ac)PK_	3119	9	O14686_3119	2	0.62919	0.84599	-	-	3	ASVLPEVKPKVEEGG	20200603_LPS_SILAC_Kac_IP_Combine_120min	4874
Q9BR39	Junctophilin-2	JPH2	1	98.582	1	K	_GLTK(ac)AGAK_	647	4	Q9BR39_647	2	-0.13033	0.83923	-	-	1	TEARGLTKAGAKKKA	20190709_HepG2_LPS_SILAC_KacIP_CID_120min_AS_1st	583
A0A087WT27	Acetylglucosamine phosphomutase	PGM3	1	75.819	1	K	_VPVYCTK(ac)TGVK_	269	7	A0A087WT27_269	2	-1.7691	0.83812	-	-	1	KVPVYCTKTGVKHLH	20190709_HepG2_LPS_SILAC_KacIP_CID_120min_AS_1st	8149
Q03164	Histone-lysine N-methyltransferase 2A	KMT2A	0.996579	142.45	1	K	_SSIAGSEDAEPLAPPIKPIK(ac)PVTR_	1133	20	Q03164_1133	3	0.38514	0.83791	-	-	4	APPIKPIKPVTRNKA	20200603_LPS_SILAC_Kac_IP_Combine_120min	6542
O95696	Bromodomain-containing protein 1	BRD1	1	56.139	2	K	_ENDEEM(ox)K(ac)AAK(ac)EK_	516	7	O95696_516	2	0.95831	0.8336	-	-	1	RENDEEMKAAKEKLK	200719_HepG2_LPS_Kac_15cm_ExSen_2hr_ooo	3374
O95696	Bromodomain-containing protein 1	BRD1	1	56.139	2	K	_ENDEEM(ox)K(ac)AAK(ac)EK_	519	10	O95696_519	2	0.95831	0.8336	-	-	1	DEEMKAAKEKLKYWQ	200719_HepG2_LPS_Kac_15cm_ExSen_2hr_ooo	3374
H0Y5L2	Ethylmalonyl-CoA decarboxylase	ECHDC1	1	92.856	1	K	_VLSGALK(ac)LDSK_	225	7	H0Y5L2_225	2	1.7376	0.83017	-	-	2	KVLSGALKLDSKNAL	20200603_LPS_SILAC_Kac_IP_Combine_120min	3776
E9PRL6	Histone acetyltransferase	KAT5	1	58.082	1	K	_EVPASAQASGK(ac)TLPIPVQITLR_	98	11	E9PRL6_98	3	0.84779	0.82954	-	-	1	ASAQASGKTLPIPVQ	20190709_HepG2_LPS_SILAC_KacIP_CID_120min_AS_1st	26731
H0YC16	Phospholipase A-2-activating protein	PLAA	1	111.31	1	K	_SAASK(ac)TMNIYFPK_	56	5	H0YC16_56	2	0.40572	0.82835	-	-	1	AYRSAASKTMNIYFP	20190709_HepG2_LPS_SILAC_KacIP_CID_120min_AS_1st	18349
A0A0U1RQU7	Succinate--CoA ligase [ADP-forming] subunit beta, mitochondrial	SUCLA2	1	103.08	1	K	_SPDEAYAIAK(ac)K_	87	10	A0A0U1RQU7_87	2	1.043	0.82643	-	-	1	DEAYAIAKKLGTEER	200719_HepG2_LPS_Kac_15cm_ExSen_2hr_ooo	6539
K7EN42	Glycylpeptide N-tetradecanoyltransferase 1	NMT1	1	88.101	1	K	_GGLSPANDTGAK(ac)K_	54	12	K7EN42_54	2	0.81227	0.8245	-	-	1	PANDTGAKKKKKKQK	200719_HepG2_LPS_Kac_15cm_ExSen_2hr_ooo	3559
B4DUR8	T-complex protein 1 subunit gamma	CCT3	1	111.12	1	K	_GASK(ac)EILSEVER_	336	4	B4DUR8_336	2	-0.5528	0.82244	-	-	2	ILLRGASKEILSEVE	20200603_LPS_SILAC_Kac_IP_Combine_120min	4822
O75586	Mediator of RNA polymerase II transcription subunit 6	MED6	1	68.481	2	K	_NVQQTVSAK(ac)GPPEK(ac)R_	241	14	O75586_241	2	0.47234	0.81378	-	-	1	SAKGPPEKRMRLQ	200719_HepG2_LPS_Kac_15cm_ExSen_2hr_ooo	6746
H7BZ29	MRS2-like protein	MRS2	1	129.43	1	K	_TSDVSQATLASVAPVFTVTK(ac)FDK_	42	20	H7BZ29_42	3	0.7128	0.81374	-	-	7	APVFTVTKFDKQGNV	20190613_HepG2_LPS_SILAC_KacIP_CID_120min_AS_1st-2	28352
Q9UNL4	Inhibitor of growth protein 4	ING4	1	98.676	2	K	_SK(ac)GK(ac)NSDEEAPK_	146	2	Q9UNL4_146	2	1.3756	0.81235	-	-	3	KAARARSKGKNSDEE	20190709_HepG2_LPS_SILAC_KacIP_CID_120min_AS_1st	2538
Q9UNL4	Inhibitor of growth protein 4	ING4	1	98.676	2	K	_SK(ac)GK(ac)NSDEEAPK_	148	4	Q9UNL4_148	2	1.3756	0.81235	-	-	3	ARARSKGKNSDEEAP	20190709_HepG2_LPS_SILAC_KacIP_CID_120min_AS_1st	2538
C9JW34	Replication factor C subunit 4	RFC4	1	110.92	1	K	_GTSISTK(ac)PPLTK_	13	7	C9JW34_13	2	-1.1719	0.81209	-	-	7	KGTSISTKPPLTKDR	20190613_HepG2_LPS_SILAC_KacIP_CID_120min_AS_2nd-2	7333
C9JWM1	Runt-related transcription factor 1	RUNX1	1	121.41	1	K	_RFTPPSTALSPGK(ac)M(ox)SEALPLGAPDAGAALAGK_	38	13	C9JWM1_38	3	0.26876	0.81094	-	-	12	STALSPGKMSEALPL	20190709_HepG2_LPS_SILAC_KacIP_CID_120min_AS_1st	27006
G3V5Z3	Serine/threonine-protein phosphatase 4 regulatory subunit 3A	PPP4R3A	1	85.813	1	K	_QDNPK(ac)LDSM(ox)R_	642	5	G3V5Z3_642	2	0.76126	0.80988	-	-	2	RERQDNPKLDSMRSI	200719_HepG2_LPS_Kac_15cm_ExSen_2hr_ooo	3503
A0A0B4J220	Uncharacterized protein C11orf98	C11orf98	1	74.987	1	K	_TAM(ox)EVEAPSK(ac)PAR_	93	10	A0A0B4J220_93	2	1.2951	0.80685	-	-	1	MEVEAPSKPARTSEP	200719_HepG2_LPS_Kac_15cm_ExSen_2hr_ooo	5146
H3BQ99	E3 ubiquitin protein ligase	RNF40	1	168.76	1	K	_AAGDGGSGPPEK(ac)K_	20	12	H3BQ99_20	2	-0.73982	0.80546	-	-	3	GGSGPPEKKLSREEK	200719_HepG2_LPS_Kac_15cm_ExSen_2hr_ooo	2347
C9JYY9	ADP-sugar pyrophosphatase	NUDT5	1	54.023	1	K	_TTYM(ox)DPTGK(ac)TR_	42	9	C9JYY9_42	2	1.1622	0.80468	-	-	1	TYMDPTGKTRTWESV	200719_HepG2_LPS_Kac_15cm_ExSen_2hr_ooo	4504
J3KTJ6	Gamma-soluble NSF attachment protein	NAPG	1	118.07	1	K	_AAVAFK(ac)NAK_	91	6	J3KTJ6_91	2	-0.52937	0.79778	-	-	1	GKAAVAFKNAKQFEQ	200719_HepG2_LPS_Kac_15cm_ExSen_2hr_ooo	4563
A0A0A0MQR4	Protein capicua homolog	CIC	1	187.13	1	K	_PAATM(ox)VTNVVRPVSSTPVPIASK(ac)PFPTSGR_	689	23	A0A0A0MQR4_689	3	0.081868	0.79628	-	-	14	TPVPIASKPFPTSGR	20190617_HepG2_LPS_SILAC_KacIP_CID_120min_AS_2nd	25472
Q6KC79	Nipped-B-like protein	NIPBL	1	128.12	1	K	_STVNEK(ac)PK_	1082	6	Q6KC79_1082	2	-0.74073	0.79628	-	-	1	KRSTVNEKPKYAEIS	20190709_HepG2_LPS_SILAC_KacIP_CID_120min_AS_1st	1325
H0Y4D4	3-ketoacyl-CoA thiolase, peroxisomal	ACAA1	0.806741	88.09	1	K	_GCFQAEIVPVTTTVHDDKGTK(ac)R_	110	21	H0Y4D4_110	4	-0.074495	0.79523	-	-	1	VHDDKGTKRSITVTQ	200719_HepG2_LPS_Kac_15cm_ExSen_2hr_ooo	9113
D6RAL1	Ribosome-releasing factor 2, mitochondrial	GFM2	1	143.31	1	K	_TFK(ac)GVVDVVM(ox)K_	191	3	D6RAL1_191	2	-0.26789	0.79207	-	-	12	IGEAKTFKGVVDVVM	20190709_HepG2_LPS_SILAC_KacIP_CID_120min_AS_2nd	19345
P42568	Protein AF-9	MLLT3	0.974857	48.044	1	K	_M(ox)AFK(ac)EPKPM(ox)SK_	254	4	P42568_254	3	-0.3143	0.79202	-	-	1	IVPKMAFKEPKPMSK	200719_HepG2_LPS_Kac_15cm_ExSen_2hr_ooo	3092
F5H6T1	Actin-related protein 2	ACTR2	1	46.569	1	K	_SEFYK(ac)HIVLSGGSTMYPGLPSR_	244	5	F5H6T1_244	3	-0.11261	0.79079	-	-	1	DTRSEFYKHIVLSGG	20190709_HepG2_LPS_SILAC_KacIP_CID_120min_AS_1st	24361
M0R054	SUMO-activating enzyme subunit 1	SAE1	1	59.227	1	K	_AK(ac)LDSSETTM(ox)VK_	134	2	M0R054_134	2	-0.53277	0.7903	-	-	1	GPDTKRAKLDSSETT	200719_HepG2_LPS_Kac_15cm_ExSen_2hr_ooo	4644
K7EL96	Perilipin-3	PLIN3	1	109.16	1	K	_TVCDAAEK(ac)GVR_	34	8	K7EL96_34	2	-1.4468	0.78705	-	-	2	TVCDAAEKGVRTLTA	200719_HepG2_LPS_Kac_15cm_ExSen_2hr_ooo	4490
O14686	Histone-lysine N-methyltransferase 2D	KMT2D	1	87.352	1	K	_DPFAPLHK(ac)PPRPQPPEVAFK_	2468	8	O14686_2468	4	0.3939	0.78654	-	-	6	DPFAPLHKPPRPQPP	20200603_LPS_SILAC_Kac_IP_Combine_120min	6552
A0A1W2PQ37	Malic enzyme	ME2	1	187.86	1	K	_SIVDNWPENHVK(ac)AVVVTDGER_	119	12	A0A1W2PQ37_119	3	0.38205	0.78604	-	-	9	NWPENHVKAVVVTDG	20200603_LPS_SILAC_Kac_IP_Combine_120min	7303
H0Y6I7	Lysine-specific demethylase 6A	KDM6A	1	74.141	1	K	_ESK(ac)PSGNILTVPETSR_	317	3	H0Y6I7_317	2	0.69171	0.78346	-	-	1	ITLTKESKPSGNILT	200719_HepG2_LPS_Kac_15cm_ExSen_2hr_ooo	10236
B4DT28	Heterogeneous nuclear ribonucleoprotein R	HNRNPR	0.999999	157.68	1	K	_VQESTKGPDEAK(ac)IK_	25	12	B4DT28_25	2	0.053418	0.78127	-	-	2	TKGPDEAKIKVFVGK	200719_HepG2_LPS_Kac_15cm_ExSen_2hr_ooo	3395
A0A2R8Y7R0	Transcription activator BRG1	SMARCA4	1	50.188	1	K	_VIHVESGK(ac)ILTGTDAPK_	96	8	A0A2R8Y7R0_96	3	0.44436	0.77877	-	-	1	VIHVESGKILTGTDA	200719_HepG2_LPS_Kac_15cm_ExSen_2hr_ooo	8850
Q15059	Bromodomain-containing protein 3	BRD3	1	113.53	1	K	_DLEDGEVPQHAGK(ac)K_	304	13	Q15059_304	2	0.1692	0.77571	-	-	1	EVPQHAGKKGKLSEH	20200603_LPS_SILAC_Kac_IP_Combine_120min	1914
A0A0U1RQC1	PCNA-associated factor	0	1	133.93	1	K	_K(ac)VLGSSTSATNSTSVSSR_	24	1	A0A0U1RQC1_24	2	-0.040491	0.77497	-	-	1	VAARAPRKVLGSSTS	200719_HepG2_LPS_Kac_15cm_ExSen_2hr_ooo	5152
H0Y4D4	3-ketoacyl-CoA thiolase, peroxisomal	ACAA1	1	54.898	1	K	_EK(ac)QDTFALASQQK_	71	2	H0Y4D4_71	2	-0.32788	0.77426	-	-	1	RFGISREKQDTFALA	200719_HepG2_LPS_Kac_15cm_ExSen_2hr_ooo	7641
F5H6Y5	Nuclear mitotic apparatus protein 1	NUMA1	1	52.247	1	K	_CLEEK(ac)NEILQGK_	379	5	F5H6Y5_379	2	-0.60306	0.77318	-	-	1	DKKCLEEKNEILQGK	200719_HepG2_LPS_Kac_15cm_ExSen_2hr_ooo	9681
Q709F0	Acyl-CoA dehydrogenase family member 11	ACAD11	1	110.12	1	K	_IAIEK(ac)IR_	683	5	Q709F0_683	2	-1.1269	0.77095	-	-	8	ESRIAIEKIRLLTLK	20190709_HepG2_LPS_SILAC_KacIP_CID_120min_AS_1st	9992
E7EWM1	Nuclear receptor coactivator 2	NCOA2	1	57.434	1	K	_GQTK(ac)LLQLLTTK_	640	4	E7EWM1_640	2	0.16442	0.76577	-	-	1	HDSKGQTKLLQLLTT	200719_HepG2_LPS_Kac_15cm_ExSen_2hr_ooo	15287
H0Y4D4	3-ketoacyl-CoA thiolase, peroxisomal	ACAA1	1	87.352	1	K	_GCFQAEIVPVTTTVHDDK(ac)GTK_	107	18	H0Y4D4_107	3	0.14033	0.76278	-	-	8	TTTVHDDKGTKRSIT	20200603_LPS_SILAC_Kac_IP_Combine_120min	5606
Q709F0	Acyl-CoA dehydrogenase family member 11	ACAD11	1	110.97	1	K	_AAHSM(ox)DTLGSAGAK(ac)K_	704	14	Q709F0_704	2	-1.1372	0.75758	-	-	2	TLGSAGAKKEIAMIK	20200603_LPS_SILAC_Kac_IP_Combine_120min	762
C9IYS5	Phytanoyl-CoA dioxygenase, peroxisomal	PHYH	1	90.707	1	K	_DVTISK(ac)SEYAPSEK_	8	6	C9IYS5_8	2	0.21566	0.75748	-	-	1	MRDVTISKSEYAPSE	200719_HepG2_LPS_Kac_15cm_ExSen_2hr_ooo	8965
O00512	B-cell CLL/lymphoma 9 protein	BCL9	1	210.38	1	K	_K(ac)PLDISVAGSQVHSPGINPLK_	844	1	O00512_844	3	-0.98015	0.7531	-	-	3	VQRGLGRKPLDISVA	20200603_LPS_SILAC_Kac_IP_Combine_120min	6773
Q96DC0	DCI protein	ECI1	1	101.17	1	K	_DADVQNFVSFISK(ac)DSIQK_	224	13	Q96DC0_224	3	0.45345	0.7477	-	-	1	NFVSFISKDSIQKSL	20200603_LPS_SILAC_Kac_IP_Combine_120min	10786
F1T0B3	ATP-dependent RNA helicase DDX1	DDX1	1	95.205	1	K	_SQHSGNAQVTQTK(ac)FLPNAPK_	200	13	F1T0B3_200	3	0.61455	0.74113	-	-	1	NAQVTQTKFLPNAPK	20200603_LPS_SILAC_Kac_IP_Combine_120min	3394
Q5T7F5	Cap-specific mRNA	CMTR1	1	45.28	1	K	_EGEGLGK(ac)YSQGR_	108	7	Q5T7F5_108	2	-1.1234	0.73886	-	-	1	REGEGLGKYSQGRKD	200719_HepG2_LPS_Kac_15cm_ExSen_2hr_ooo	5611
R4GN99	Peptidyl-prolyl cis-trans isomerase	PPIF	1	143.98	1	K	_VVLELK(ac)ADVVPK_	67	6	R4GN99_67	2	-0.04148	0.73768	-	-	8	GRVVLELKADVVPKT	20190613_HepG2_LPS_SILAC_KacIP_CID_120min_AS_1st-1	19568
C9J9S3	Serine/threonine-protein phosphatase	PPP1CB	1	123.42	1	K	_GCRPGK(ac)IVQM(ox)TEAEVR_	25	6	C9J9S3_25	3	0.53389	0.73082	-	-	3	VRGCRPGKIVQMTEA	20190709_HepG2_LPS_SILAC_KacIP_CID_120min_AS_2nd	13397
Q09472	Histone acetyltransferase p300	EP300	1	49.022	1	K	_TQAAGPVSQGK(ac)AAGQVTPPTPPQTAQPPLPGPPPAAVEMAMQIQR_	1900	11	Q09472_1900	4	-0.52905	0.72343	-	-	1	AGPVSQGKAAGQVTP	20190709_HepG2_LPS_SILAC_KacIP_CID_120min_AS_1st	29703
F5H2U8	High mobility group protein HMGI-C	HMGA2	1	61.616	1	K	_GEGAGQPSTSAQGQPAAPAPQK(ac)R_	26	22	F5H2U8_26	2	0.40718	0.72247	-	-	2	PAAPAPQKRGRGRPR	200719_HepG2_LPS_Kac_15cm_ExSen_2hr_ooo	4749
H0YDD4	Acetyltransferase component of pyruvate dehydrogenase complex	DLAT	1	135.1	1	K	_SK(ac)ISVNDFIIK_	305	2	H0YDD4_305	2	0.36559	0.71761	-	-	6	KILEGRSKISVNDFI	20200603_LPS_SILAC_Kac_IP_Combine_120min	7335
M0R0J3	Hepatoma-derived growth factor-related protein 2	HDGFL2	0.961176	66.014	1	K	_IDDIADGAVKPPPNK(ac)YPIFFFGTHETAFLGPK_	39	15	M0R0J3_39	4	0.55367	0.71232	-	-	3	AVKPPPNKYPIFFFG	20190709_HepG2_LPS_SILAC_KacIP_CID_120min_AS_3rd	30732
Q86UU0	B-cell CLL/lymphoma 9-like protein	BCL9L	1	124.25	1;2	K	_GHCPPAPAK(ac)PMHPENK(ac)LTNHGK_	36	9	Q86UU0_36	4	-0.77708	0.70936	-	-	13	HCPPAPAKPMHPENK	20190709_HepG2_LPS_SILAC_KacIP_CID_120min_AS_2nd	4391
Q5JR95	40S ribosomal protein S8	RPS8	1	230.69	1	K	_GAK(ac)LTPEEEEILNK_	108	3	Q5JR95_108	2	0.91692	0.70637	-	-	13	LGRKKGAKLTPEEEE	20190613_HepG2_LPS_SILAC_KacIP_CID_120min_AS_1st-1	14625
Q8IWA0	WD repeat-containing protein 75	WDR75	1	225.17	1	K	_SEQPTLVTASK(ac)DGYFK_	466	11	Q8IWA0_466	3	-0.99463	0.70528	-	-	12	PTLVTASKDGYFKVW	20190617_HepG2_LPS_SILAC_KacIP_CID_120min_AS_1st	19699
C9IZ41	Zyxin	ZYX	1	119.5	1	K	_PSPAISVSVSAPAFYAPQK(ac)K_	24	19	C9IZ41_24	2	-0.13053	0.69017	-	-	5	PAFYAPQKKFGPVVA	20200603_LPS_SILAC_Kac_IP_Combine_120min	7515
J3QQY0	Male-specific lethal 1 homolog	MSL1	1	133.27	1	K	_LKEPGPPLASSQGGSPAPSPAGCGGK(ac)GR_	77	26	J3QQY0_77	3	0.12695	0.68935	-	-	2	SPAGCGGKGRGLLLP	20200603_LPS_SILAC_Kac_IP_Combine_120min	3392
H3BRE0	F-box only protein 22	FBXO22	1	117.09	1	K	_VLTFLPAK(ac)ALLR_	40	8	H3BRE0_40	2	0.42332	0.68361	-	-	1	VLTFLPAKALLRVAC	20190709_HepG2_LPS_SILAC_KacIP_CID_120min_AS_1st	29601
E5RGS7	LIM zinc-binding domain-containing protein	0	1	204.28	1	K	_ALATPPK(ac)LHTCEK_	76	7	E5RGS7_76	3	-0.93654	0.68144	-	-	19	RALATPPKLHTCEKC	20200603_LPS_SILAC_Kac_IP_Combine_120min	2246
Q8J015	60S ribosomal protein L13a	RPL13A	1	73.36	1	K	_YTEVLK(ac)THGLLV_	136	6	Q8J015_136	2	-1.1608	0.67754	-	-	2	DKYTEVLKTHGLLV	20190617_HepG2_LPS_SILAC_KacIP_CID_120min_AS_2nd	22285
B9A058	3-hydroxyisobutyryl-CoA hydrolase, mitochondrial	HIBCH	1	49.448	1	K	_VINK(ac)M(ox)SPTSLK_	78	4	B9A058_78	2	0.3919	0.67631	-	-	1	EQLKVINKMSPTSLK	200719_HepG2_LPS_Kac_15cm_ExSen_2hr_ooo	5807
H3BRH3	Zinc finger CCCH domain-containing protein 18	ZC3H18	0.986719	139.56	1	K	_SAKPPAGGK(ac)SSQQPSTPQQAPPGQPQQGTFVAHK_	32	9	H3BRH3_32	4	0.27467	0.67135	-	-	4	AKPPAGGKSSQQPST	20190613_HepG2_LPS_SILAC_KacIP_CID_120min_AS_2nd-1	7308
E9PER7	General transcription factor IIE subunit 1	GTF2E1	1	63.091	1	K	_SVLNNLK(ac)GDK_	67	7	E9PER7_67	2	-0.35906	0.66654	-	-	1	RSVLNNLKGDKFIKC	20200603_LPS_SILAC_Kac_IP_Combine_120min	3317
E5RIW9	Peroxisome biogenesis factor 2	PEX2	1	226.88	1	K	_NATVGQSVLNIK(ac)YK_	84	12	E5RIW9_84	2	0.29557	0.66505	-	-	9	GQSVLNIKYKNDFSP	20190613_HepG2_LPS_SILAC_KacIP_CID_120min_AS_1st-1	15405
K7EMH3	DNA-directed RNA polymerase, mitochondrial	POLRMT	1	49.265	1	K	_TLQCLFEK(ac)QLHMELASR_	324	8	K7EMH3_324	3	0.023144	0.66237	-	-	1	TLQCLFEKQLHMELA	20190709_HepG2_LPS_SILAC_KacIP_CID_120min_AS_1st	27600
Q96JC9	ELL-associated factor 1	EAF1	1	98.634	1	K	_APTK(ac)PPVGPK_	150	4	Q96JC9_150	2	0.32115	0.66097	-	-	11	MPFRAPTKPPVGPKT	200719_HepG2_LPS_Kac_15cm_ExSen_2hr_ooo	4336
K7EMN2	6-phosphogluconate dehydrogenase, decarboxylating	PGD	1	56.569	1	K	_VVGAQSLK(ac)EM(ox)VSK_	46	8	K7EMN2_46	2	-1.7476	0.65655	-	-	1	VVGAQSLKEMVSKLK	200719_HepG2_LPS_Kac_15cm_ExSen_2hr_ooo	8723
H0YAW3	2,4-dienoyl-CoA reductase, mitochondrial	DECR1	1	65.043	1	K	_FNVIQPGPIK(ac)TK_	21	10	H0YAW3_21	2	0.52103	0.65621	-	-	1	VIQPGPIKTKECVWG	200719_HepG2_LPS_Kac_15cm_ExSen_2hr_ooo	10532
H0YKD0	Isocitrate dehydrogenase [NAD] subunit alpha, mitochondrial	IDH3A	1	107.98	1	K	_GPLK(ac)TPIAAGHPSMNLLLR_	50	4	H0YKD0_50	3	-0.12863	0.65559	-	-	5	MGLKGPLKTPIAAGH	20190709_HepG2_LPS_SILAC_KacIP_CID_120min_AS_1st	22338
P05204	Non-histone chromosomal protein HMG-17	HMGN2	1	42.317	1	K	_TDQAQK(ac)AEGAGDAK_	82	6	P05204_82	2	-0.72955	0.64692	-	-	1	AKTDQAQKAEGAGDA	200719_HepG2_LPS_Kac_15cm_ExSen_2hr_ooo	2526
E5RGR5	Ribosomal biogenesis factor	RBIS	1	50.354	1	K	_NVFHIASQK(ac)NFK_	21	9	E5RGR5_21	3	-0.45436	0.6469	-	-	1	VFHIASQKNFKAKNK	20200603_LPS_SILAC_Kac_IP_Combine_120min	3627
O75152	Zinc finger CCCH domain-containing protein 11A	ZC3H11A	0.987597	40.145	1	K	_AVEMHAAVIAAVK(ac)PLSSSSVLQEPPAKK_	684	13	O75152_684	4	0.0087126	0.64093	-	-	1	AAVIAAVKPLSSSSV	20190709_HepG2_LPS_SILAC_KacIP_CID_120min_AS_1st	21879
H0YEL7	Acetyl-CoA acetyltransferase, mitochondrial	ACAT1	1	191.44	1	K	_GSTPYGGVK(ac)LEDLIVK_	110	9	H0YEL7_110	2	0.59985	0.63911	-	-	18	STPYGGVKLEDLIVK	20200603_LPS_SILAC_Kac_IP_Combine_120min	8578
Q5SV16	ATPase family AAA domain-containing protein 3A	ATAD3A	0.999942	81.992	1	K	_MYFDK(ac)YVLKPATEGK_	154	5	Q5SV16_154	3	0.077735	0.63719	-	-	4	ERERLVRMYFDKYVL	20190709_HepG2_LPS_SILAC_KacIP_CID_120min_AS_2nd	18020
K7EJ49	Kelch-like ECH-associated protein 1	KEAP1	1	74.147	1	K	_EQGMEVVSIEGIHPK(ac)VMER_	131	15	K7EJ49_131	3	0.79043	0.6328	-	-	3	SIEGIHPKVMERLIE	20190709_HepG2_LPS_SILAC_KacIP_CID_120min_AS_1st	21230
Q53TQ3	INO80 complex subunit D	INO80D	1	80.832	1	K	_RPQK(ac)PIPPAVPQGNLSM(ox)PASVSLPVEASHIR_	560	4	Q53TQ3_560	4	0.035296	0.62457	-	-	1	RGPRRPQKPIPPAVP	20200603_LPS_SILAC_Kac_IP_Combine_120min	7209
A0A0A0MSS4	Nuclear migration protein nudC	NUDC	1	75.088	1	K	_EAK(ac)SETSGPQIK_	47	3	A0A0A0MSS4_47	2	-0.15893	0.62171	-	-	1	ARLAKEAKSETSGPQ	200719_HepG2_LPS_Kac_15cm_ExSen_2hr_ooo	3623
A0A087WW66	26S proteasome non-ATPase regulatory subunit 1	PSMD1	1	96.208	1	K	_TSSAFVGK(ac)TPEASPEPK_	310	8	A0A087WW66_310	2	0.28976	0.6118	-	-	1	TSSAFVGKTPEASPE	200719_HepG2_LPS_Kac_15cm_ExSen_2hr_ooo	7672
C9J164	Ras-associated and pleckstrin homology domains-containing protein 1	RAPH1	1	63.701	1	K	_VTRPQELDLTHQGQPITEEEQAAK(ac)LK_	250	24	C9J164_250	4	0.42148	0.60257	-	-	1	TEEEQAAKLKAEKIR	20200603_LPS_SILAC_Kac_IP_Combine_120min	5509
K7ENG2	U2 snRNP auxiliary factor large subunit	U2AF2	1	79.886	1	K	_VVVTK(ac)YCDPDSYHR_	294	5	K7ENG2_294	3	-0.063937	0.59958	-	-	4	ANRVVVTKYCDPDSY	20190617_HepG2_LPS_SILAC_KacIP_CID_120min_AS_2nd	10754
Q9BZ95	Histone-lysine N-methyltransferase NSD3	NSD3	1	95.264	1	K	_KFPTAIFESK(ac)GFR_	790	10	Q9BZ95_790	3	1.0422	0.57733	-	-	1	PTAIFESKGFRCPQH	20200603_LPS_SILAC_Kac_IP_Combine_120min	6535
A0A0A0MS66	Phosphatidate phosphatase LPIN1	LPIN1	1	41.292	1	K	_NPEMLWLWGELPQAAK(ac)SSSPHK_	325	16	A0A0A0MS66_325	3	-3.2626	0.56537	-	-	1	GELPQAAKSSSPHKM	20190709_HepG2_LPS_SILAC_KacIP_CID_120min_AS_2nd	30752
A0A3B3IRS8	SMC5-SMC6 complex localization factor protein 2	SLF2	1	58.511	2	K	_SAIK(ac)K(ac)ASNLQK_	451	4	A0A3B3IRS8_451	2	0.1719	0.52887	-	-	1	SQEKSAIKKASNLQK	200719_HepG2_LPS_Kac_15cm_ExSen_2hr_ooo	3631
A0A3B3IRS8	SMC5-SMC6 complex localization factor protein 2	SLF2	1	58.511	2	K	_SAIK(ac)K(ac)ASNLQK_	452	5	A0A3B3IRS8_452	2	0.1719	0.52887	-	-	1	QEKSAIKKASNLQKN	200719_HepG2_LPS_Kac_15cm_ExSen_2hr_ooo	3631
E9PDQ8	Succinate--CoA ligase [GDP-forming] subunit beta, mitochondrial	SUCLG2	1	73.675	1	K	_PANFLDLGGGVK(ac)EAQVYQAFK_	338	12	E9PDQ8_338	3	2.0077	0.5227	-	-	1	LDLGGGVKEAQVYQA	20190617_HepG2_LPS_SILAC_KacIP_CID_120min_AS_1st	32862
P05204	Non-histone chromosomal protein HMG-17	HMGN2	0.999972	76.357	1	K	_LSAKPAPPK(ac)PEPK_	36	9	P05204_36	3	-0.51295	0.51155	-	-	5	SAKPAPPKPEPKPKK	20190613_HepG2_LPS_SILAC_KacIP_CID_120min_AS_1st-1	4943
H0Y8S8	Ubiquitin-like modifier-activating enzyme 6	UBA6	1	106.42	1	K	_IDAHLNK(ac)VCPTTETIYNDEFYTK_	78	7	H0Y8S8_78	3	-1.247	0.50216	-	-	1	KIDAHLNKVCPTTET	20190617_HepG2_LPS_SILAC_KacIP_CID_120min_AS_2nd	23188
F5H3L7	Serine/threonine-protein kinase TAO3	TAOK3	0.999141	73.632	1	K	_WQDILKEVK(ac)FLR_	74	9	F5H3L7_74	3	1.8405	0.4963	-	-	1	QDILKEVKFLRQLKH	20190709_HepG2_LPS_SILAC_KacIP_CID_120min_AS_1st	24470
C9JM14	B-cell receptor-associated protein	BCAP31	1	51.235	1	K	_VNLQNNPGAMEHFHMK(ac)LFR_	95	16	C9JM14_95	4	-0.69486	0.40997	-	-	1	AMEHFHMKLFRAQRN	20190709_HepG2_LPS_SILAC_KacIP_CID_120min_AS_1st	20720
P04732	Metallothionein-1E	MT1E	1	82.494	1	K	_GASEK(ac)CSCCA_	56	5	P04732_56	2	1.3918	0.39975	-	-	1	VCKGASEKCSCCA	20190617_HepG2_LPS_SILAC_KacIP_CID_120min_AS_2nd	1954
J3KSW1	Phosphoinositide 3-kinase regulatory subunit 5	PIK3R5	1	102.77	1	K	_ISGK(ac)VAR_	530	4	J3KSW1_530	2	-0.54147	0.3264	-	-	1	GSDRISGKVARAYSN	20190613_HepG2_LPS_SILAC_KacIP_CID_120min_AS_1st-1	730
H0YMG7	Retinal dehydrogenase 2	ALDH1A2	1	73.415	1	K	_IAK(ac)EEIFGPVQEILR_	386	3	H0YMG7_386	2	-1.9355	0.26728	-	-	3	TDDMRIAKEEIFGPV	20190617_HepG2_LPS_SILAC_KacIP_CID_120min_AS_2nd	24060
Q8WUF5	RelA-associated inhibitor	PPP1R13L	1	64.565	1	K	_GSM(ox)EQAPAVALPPTHK(ac)K_	540	16	Q8WUF5_540	3	3.9559	0.18138	-	-	1	VALPPTHKKQYQQII	20190613_HepG2_LPS_SILAC_KacIP_CID_120min_AS_2nd-2	18533
E7EUW0	Serine-rich coiled-coil domain-containing protein 1	CCSER1	1	79.986	1	K	_QNLSLK(ac)LTK_	580	6	E7EUW0_580	2	1.0413	0.11255	-	-	1	SKQNLSLKLTKDVDQ	20190613_HepG2_LPS_SILAC_KacIP_CID_120min_AS_1st-1	4437
A0A0A0MRA3	Titin	TTN	0.999994	104.94	1	K	_ILMPEQITIKAGK(ac)K_	12609	13	A0A0A0MRA3_12609	3	-3.8271	0.077203	-	-	1	QITIKAGKKLRIEAH	20190617_HepG2_LPS_SILAC_KacIP_CID_120min_AS_1st	6614
Q5W011	Splicing factor 45	RBM17	1	68.168	1	K	_TK(ac)QSTVLAPVIDLK_	46	2	Q5W011_46	2	0.14544	0.075936	-	-	1	QAKSQRTKQSTVLAP	20190617_HepG2_LPS_SILAC_KacIP_CID_120min_AS_1st	31865
Q9BYV1	Alanine--glyoxylate aminotransferase 2, mitochondrial	AGXT2	1	58.743	1	K	_VNAVAQK(ac)QLGR_	129	7	Q9BYV1_129	2	-0.017379	0.062044	-	-	1	KVNAVAQKQLGRLWH	200719_HepG2_LPS_Kac_15cm_ExSen_2hr_ooo	5048
P09972	Fructose-bisphosphate aldolase C	ALDOC	1	59.561	1	K	_ALSDHHVYLEGTLLK(ac)PNMVTPGHACPIK_	230	15	P09972_230	4	-0.8791	-	1.2612	-	-	YLEGTLLKPNMVTPG	20190709_HepG2_LPS_SILAC_KacIP_CID_120min_AS_1st	20789
Q93077	Histone H2A type 1-C	H2AC6	1	160.09	1	K	_VTIAQGGVLPNIQAVLLPK(ac)K_	119	19	Q93077_119	3	0.30511	-	1.19	-	-	IQAVLLPKKTESHHK	20190613_HepG2_LPS_SILAC_KacIP_CID_120min_AS_1st-1	29972
Q32Q12	Nucleoside diphosphate kinase	NME1-NME2	1	156.06	1	K	_VMLGETNPADSK(ac)PGTIR_	125	12	Q32Q12_125	2	1.5144	-	1.16895	-	-	ETNPADSKPGTIRGD	20190709_HepG2_LPS_SILAC_KacIP_CID_120min_AS_1st	14881
P22234	Multifunctional protein ADE2 [Includes: Phosphoribosylaminoimidazole-succinocarboxamide synthase	PAICS	1	48.568	1	K	_EVTPEGLQM(ox)VK(ac)K_	246	11	P22234_246	2	-0.04874	-	1.1265	-	-	PEGLQMVKKNFEWVA	200719_HepG2_LPS_Kac_15cm_ExSen_2hr_ooo	7772
P21796	Voltage-dependent anion-selective channel protein 1	VDAC1	1	60.55	1	K	_(ac)AVPPTYADLGK(ac)SAR_	12	11	P21796_12	2	-0.97844	-	1.1201	-	-	PTYADLGKSARDVFT	200719_HepG2_LPS_Kac_15cm_ExSen_2hr_ooo	13404
P11021	Endoplasmic reticulum chaperone BiP	HSPA5	1	71.451	1	K	_IPK(ac)IQQLVK_	370	3	P11021_370	2	0.10656	-	1.0849	-	-	GGSTRIPKIQQLVKE	20200603_LPS_SILAC_Kac_IP_Combine_120min	4945
P30048	Thioredoxin-dependent peroxide reductase, mitochondrial	PRDX3	0.999995	53.522	1	K	_LVK(ac)AFQYVETHGEVCPANWTPDSPTIKPSPAASK_	217	3	P30048_217	4	-0.14424	-	1.08025	-	-	EETLRLVKAFQYVET	20190709_HepG2_LPS_SILAC_KacIP_CID_120min_AS_1st	24197
P50990	T-complex protein 1 subunit theta	CCT8	1	66.267	1	K	_K(ac)FAEAFEAIPR_	440	1	P50990_440	2	0.68658	-	1.0778	-	-	LEQYAIKKFAEAFEA	200719_HepG2_LPS_Kac_15cm_ExSen_2hr_ooo	12984
Q13404	Ubiquitin-conjugating enzyme E2 variant 1	UBE2V1	1	55.261	1	K	_(ac)AATTGSGVK(ac)VPR_	10	9	Q13404_10	2	-0.17859	-	1.07583	-	-	ATTGSGVKVPRNFRL	200719_HepG2_LPS_Kac_15cm_ExSen_2hr_ooo	7866
P14866	Heterogeneous nuclear ribonucleoprotein L	HNRNPL	1	52.784	1	K	_LK(ac)TDNAGDQHGGGGGGGGGAGAAGGGGGGENYDDPHK_	62	2	P14866_62	4	0.84371	-	1.0724	-	-	GRAPKRLKTDNAGDQ	20190613_HepG2_LPS_SILAC_KacIP_CID_120min_AS_1st-2	3899
O76021	Ribosomal L1 domain-containing protein 1	RSL1D1	1	133.98	1	K	_AAESETPGK(ac)SPEK_	426	9	O76021_426	2	1.4271	-	1.0629	-	-	AESETPGKSPEKKPK	20190613_HepG2_LPS_SILAC_KacIP_CID_120min_AS_2nd-1	2322
P05455	Lupus La protein	SSB	1	145.61	1	K	_IIEDQQESLNK(ac)WK_	328	11	P05455_328	2	-0.16658	-	1.05895	-	-	DQQESLNKWKSKGRR	20190613_HepG2_LPS_SILAC_KacIP_CID_120min_AS_1st-1	13431
P08758	Annexin A5	ANXA5	1	140.63	1	K	_HALK(ac)GAGTNEK_	101	4	P08758_101	2	0.25257	-	1.05785	-	-	YELKHALKGAGTNEK	20200603_LPS_SILAC_Kac_IP_Combine_120min	380
P00505	Aspartate aminotransferase, mitochondrial	GOT2	1	65.808	1	K	_ASAELALGENSEVLK(ac)SGR_	122	15	P00505_122	2	0.17429	-	1.05453	-	-	GENSEVLKSGRFVTV	200719_HepG2_LPS_Kac_15cm_ExSen_2hr_ooo	11451
P30837	Aldehyde dehydrogenase X, mitochondrial	ALDH1B1	1	83.204	1	K	_EEIFGPVQPLFK(ac)FK_	426	12	P30837_426	2	1.1717	-	1.05365	-	-	GPVQPLFKFKKIEEV	20200603_LPS_SILAC_Kac_IP_Combine_120min	10772
P61604	10 kDa heat shock protein, mitochondrial	HSPE1	1	124.84	1	K	_VLLPEYGGTK(ac)VVLDDK_	80	10	P61604_80	2	0.54068	-	1.05356	-	-	LPEYGGTKVVLDDKD	20190617_HepG2_LPS_SILAC_KacIP_CID_120min_AS_1st	24264
P55072	Transitional endoplasmic reticulum ATPase	VCP	1	56.817	1	K	_(ac)ASGADSK(ac)GDDLSTAILK_	8	7	P55072_8	2	1.2953	-	1.0464	-	-	MASGADSKGDDLSTA	200719_HepG2_LPS_Kac_15cm_ExSen_2hr_ooo	14759
P07108	Acyl-CoA-binding protein	DBI	1	89.624	1	K	_(ac)SQAEFEK(ac)AAEEVR_	8	7	P07108_8	2	0.23338	-	1.04124	-	-	MSQAEFEKAAEEVRH	200719_HepG2_LPS_Kac_15cm_ExSen_2hr_ooo	14274
P04843	Dolichyl-diphosphooligosaccharide--protein glycosyltransferase subunit 1	RPN1	1	94.122	1	K	_ELVLK(ac)SAVEAER_	564	5	P04843_564	2	1.4975	-	1.03935	-	-	QVKELVLKSAVEAER	200719_HepG2_LPS_Kac_15cm_ExSen_2hr_ooo	11453
Q15067	Peroxisomal acyl-coenzyme A oxidase 1	ACOX1	1	68.481	1	K	_SK(ac)EVAWNLTSVDLVR_	512	2	Q15067_512	2	-0.23116	-	1.03896	-	-	EVIHRKSKEVAWNLT	200719_HepG2_LPS_Kac_15cm_ExSen_2hr_ooo	16185
P24666	Low molecular weight phosphotyrosine protein phosphatase	ACP1	1	70.889	1	K	_AK(ac)IELLGSYDPQK_	113	2	P24666_113	2	1.9919	-	1.03672	-	-	QVKTCKAKIELLGSY	200719_HepG2_LPS_Kac_15cm_ExSen_2hr_ooo	12549
Q9BQ69	ADP-ribose glycohydrolase MACROD1	MACROD1	1	89.355	1	K	_DK(ac)QLNEK_	148	2	Q9BQ69_148	2	-0.41943	-	1.03366	-	-	EPRYKKDKQLNEKIS	200719_HepG2_LPS_Kac_15cm_ExSen_2hr_ooo	2539
Q8IYQ7	Threonine synthase-like 1	THNSL1	1	205.78	1	K	_LSCGEWK(ac)SLVGATYVER_	281	7	Q8IYQ7_281	2	0.10395	-	1.0302	-	-	KLSCGEWKSLVGATY	20190709_HepG2_LPS_SILAC_KacIP_CID_120min_AS_1st	26223
P19338	Nucleolin	NCL	1	89.698	1	K	_AAATPAK(ac)K_	95	7	P19338_95	2	-0.87875	-	1.01775	-	-	KAAATPAKKTVTPAK	20200603_LPS_SILAC_Kac_IP_Combine_120min	322
P19338	Nucleolin	NCL	1	79.713	1	K	_NQGDPK(ac)K_	15	6	P19338_15	2	-0.092613	-	1.01775	-	-	GKNQGDPKKMAPPPK	20200603_LPS_SILAC_Kac_IP_Combine_120min	234
P19338	Nucleolin	NCL	1	130.28	1	K	_K(ac)TVTPAK_	96	1	P19338_96	2	-0.8037	-	1.01775	-	-	AAATPAKKTVTPAKA	200719_HepG2_LPS_Kac_15cm_ExSen_2hr_ooo	2193
P38646	Stress-70 protein, mitochondrial	HSPA9	1	83.167	1	K	_VINEPTAAALAYGLDK(ac)SEDK_	234	16	P38646_234	3	1.0977	-	1.01573	-	-	ALAYGLDKSEDKVIA	20190613_HepG2_LPS_SILAC_KacIP_CID_120min_AS_1st-2	21097
P11142	Heat shock cognate 71 kDa protein	HSPA8	1	72.29	1	K	_IQK(ac)LLQDFFNGK_	348	3	P11142_348	2	0.5909	-	0.99867	-	-	TRIPKIQKLLQDFFN	200719_HepG2_LPS_Kac_15cm_ExSen_2hr_ooo	16483
P06748	Nucleophosmin	NPM1	1	104.05	1	K	_FINYVK(ac)NCFR_	273	6	P06748_273	2	0.31085	-	0.998465	-	-	AKFINYVKNCFRMTD	20190613_HepG2_LPS_SILAC_KacIP_CID_120min_AS_2nd-1	16907
A0A3B3ITZ9	Thyroid hormone receptor-associated protein 3	THRAP3	1	146.36	1	K	_VIGANK(ac)NQEEEK_	461	6	A0A3B3ITZ9_461	2	1.5558	-	0.99705	-	-	SKVIGANKNQEEEKS	200719_HepG2_LPS_Kac_15cm_ExSen_2hr_ooo	3276
P61978	Heterogeneous nuclear ribonucleoprotein K	HNRNPK	1	48.527	1	K	_IILDLISESPIK(ac)GR_	219	12	P61978_219	2	-1.731	-	0.9942	-	-	LISESPIKGRAQPYD	200719_HepG2_LPS_Kac_15cm_ExSen_2hr_ooo	16906
A0A0C4DGA2	Enoyl-CoA delta isomerase 2, mitochondrial	ECI2	1	87.639	1	K	_ALK(ac)AASK_	147	3	A0A0C4DGA2_147	2	0.094051	-	0.99368	-	-	HEIMRALKAASKDDS	20200603_LPS_SILAC_Kac_IP_Combine_120min	379
P35754	Glutaredoxin-1	GLRX	1	117.93	1	K	_VVVFIK(ac)PTCPYCR_	20	6	P35754_20	2	0.93005	-	0.99247	-	-	GKVVVFIKPTCPYCR	20190709_HepG2_LPS_SILAC_KacIP_CID_120min_AS_3rd	18669
A0A0C4DFV9	Protein SET	SET	1	155.06	1	K	_VEVTEFEDIK(ac)SGYR_	108	10	A0A0C4DFV9_108	2	-0.81912	-	0.99099	-	-	VTEFEDIKSGYRIDF	20190617_HepG2_LPS_SILAC_KacIP_CID_120min_AS_1st	22938
P04406	Glyceraldehyde-3-phosphate dehydrogenase	GAPDH	1	94.465	1	K	_AGAHLQGGAK(ac)R_	117	10	P04406_117	2	-0.52202	-	0.98917	-	-	AHLQGGAKRVIISAP	20200603_LPS_SILAC_Kac_IP_Combine_120min	401
P49748	Very long-chain specific acyl-CoA dehydrogenase, mitochondrial	ACADVL	1	68.168	1	K	_TPVTDPATGAVK(ac)EK_	276	12	P49748_276	2	0.15903	-	0.983745	-	-	DPATGAVKEKITAFV	200719_HepG2_LPS_Kac_15cm_ExSen_2hr_ooo	5840
O75822	Eukaryotic translation initiation factor 3 subunit J	EIF3J	1	71.176	1	K	_K(ac)LQEESDLELAK_	122	1	O75822_122	2	2.3257	-	0.96389	-	-	ADKLRLKKLQEESDL	200719_HepG2_LPS_Kac_15cm_ExSen_2hr_ooo	8535
Q9NQ88	Fructose-2,6-bisphosphatase TIGAR	TIGAR	1	78.708	1	K	_QAAAAGIFLNNVK(ac)FTHAFSSDLMR_	50	13	Q9NQ88_50	3	-0.35661	-	0.96225	-	-	GIFLNNVKFTHAFSS	20190709_HepG2_LPS_SILAC_KacIP_CID_120min_AS_2nd	30031
P38117	Electron transfer flavoprotein subunit beta	ETFB	1	53.448	1	K	_VETTEDLVAK(ac)LK_	248	10	P38117_248	2	1.9634	-	0.96186	-	-	TTEDLVAKLKEIGRI	200719_HepG2_LPS_Kac_15cm_ExSen_2hr_ooo	13121
P00558	Phosphoglycerate kinase 1	PGK1	1	123.58	1	K	_GCITIIGGGDTATCCAK(ac)WNTEDK_	382	17	P00558_382	3	0.73346	-	0.960415	-	-	DTATCCAKWNTEDKV	20190613_HepG2_LPS_SILAC_KacIP_CID_120min_AS_1st-1	19068
Q8NE71	ATP-binding cassette sub-family F member 1	ABCF1	1	71.176	1	K	_AVSEEQQPALK(ac)GK_	174	11	Q8NE71_174	2	0.097421	-	0.945375	-	-	EEQQPALKGKKGKEE	200719_HepG2_LPS_Kac_15cm_ExSen_2hr_ooo	4602
Q92793	CREB-binding protein	CREBBP	1	78.976	2	K	_WHCTVCEDYDLCINCYNTK(ac)SHAHK(ac)MVK_	1736	19	Q92793_1736	4	0.74609	-	0.94392	-	-	NTKSHAHKMVKWGLG	20190709_HepG2_LPS_SILAC_KacIP_CID_120min_AS_2nd	16811
Q06830	Peroxiredoxin-1	PRDX1	1	89.859	1	K	_IGHPAPNFK(ac)ATAVM(ox)PDGQFK_	16	9	Q06830_16	3	0.96444	-	0.93677	-	-	GHPAPNFKATAVMPD	20200603_LPS_SILAC_Kac_IP_Combine_120min	4868
P09874	Poly [ADP-ribose] polymerase 1	PARP1	1	51.089	1	K	_TAEAGGVTGK(ac)GQDGIGSK_	97	10	P09874_97	2	0.0447	-	0.935645	-	-	EAGGVTGKGQDGIGS	200719_HepG2_LPS_Kac_15cm_ExSen_2hr_ooo	5095
H3BQZ7	HCG2044799	HNRNPUL2-BSCL2	1	71.289	1	K	_LQEALDAEMLEDEAGGGGAGPGGACK(ac)AEPR_	58	26	H3BQZ7_58	3	-0.58129	-	0.92624	-	-	AGPGGACKAEPRPVA	20190613_HepG2_LPS_SILAC_KacIP_CID_120min_AS_1st-1	21190
Q9Y696	Chloride intracellular channel protein 4	CLIC4	1	121.91	1	K	_K(ac)PADLQNLAPGTHPPFITFNSEVK_	62	1	Q9Y696_62	3	-0.64056	-	0.918295	-	-	TTVDLKRKPADLQNL	20190709_HepG2_LPS_SILAC_KacIP_CID_120min_AS_1st	24957
Q9H1E3	Nuclear ubiquitous casein and cyclin-dependent kinase substrate 1	NUCKS1	1	70.094	1	K	_K(ac)VVDYSQFQESDDADEDYGR_	9	1	Q9H1E3_9	3	1.0831	-	0.918235	-	-	SRPVRNRKVVDYSQF	200719_HepG2_LPS_Kac_15cm_ExSen_2hr_ooo	11415
A0A087WWP4	RNA-binding protein 15	RBM15	1	74.141	1	K	_SDGSAPSTSTASSK(ac)LK_	718	14	A0A087WWP4_718	2	0.35198	-	0.91329	-	-	STSTASSKLKSPSQK	200719_HepG2_LPS_Kac_15cm_ExSen_2hr_ooo	5131
A0A0A0MT83	Butyryl-CoA dehydrogenase	IVD	1	92.034	1	K	_GSNTCELIFEDCK(ac)IPAANILGHENK_	262	13	A0A0A0MT83_262	3	-2.0717	-	0.89091	-	-	FEDCKIPAANILGHE	20190613_HepG2_LPS_SILAC_KacIP_CID_120min_AS_1st-1	25251
H0YA96	Heterogeneous nuclear ribonucleoprotein D0	HNRNPD	1	82.069	1	K	_GGDQQSGYGK(ac)VSR_	196	10	H0YA96_196	2	0.53756	-	0.87883	-	-	DQQSGYGKVSRRGGH	200719_HepG2_LPS_Kac_15cm_ExSen_2hr_ooo	3563
P06733	Alpha-enolase	ENO1	1	153.75	1	K	_K(ac)LNVTEQEKIDK_	81	1	P06733_81	3	0.70913	-	0.8785	-	-	APALVSKKLNVTEQE	200719_HepG2_LPS_Kac_15cm_ExSen_2hr_ooo	4871
P10412	Histone H1.4	H1-4	1	144.4	1	K	_ALAAAGYDVEK(ac)NNSR_	75	11	P10412_75	2	0.50562	-	0.86769	-	-	AAGYDVEKNNSRIKL	20190613_HepG2_LPS_SILAC_KacIP_CID_120min_AS_2nd-1	8706
P78347	General transcription factor II-I	GTF2I	1	59.709	1	K	_TPTQTNGSNVPFK(ac)PR_	715	13	P78347_715	2	0.46647	-	0.851925	-	-	NGSNVPFKPRGREFS	200719_HepG2_LPS_Kac_15cm_ExSen_2hr_ooo	7658
Q9NV56	MRG/MORF4L-binding protein	MRGBP	1	58.024	1	K	_VTDK(ac)VLTANSNPSSPSAAK_	185	4	Q9NV56_185	2	0.21538	-	0.81685	-	-	KRSRVTDKVLTANSN	200719_HepG2_LPS_Kac_15cm_ExSen_2hr_ooo	6789
P09104	Gamma-enolase	ENO2	1	96.55	1	K	_ACNCLLLK(ac)VNQIGSVTEAIQACK_	343	8	P09104_343	3	-0.5335	-	0.79151	-	-	ACNCLLLKVNQIGSV	20190709_HepG2_LPS_SILAC_KacIP_CID_120min_AS_2nd	31481
Q96JM3	Chromosome alignment-maintaining phosphoprotein 1	CHAMP1	1	85.813	1	K	_K(ac)PALFPEPAK_	527	1	Q96JM3_527	2	0.16263	-	0.76742	-	-	SIDTEPRKPALFPEP	200719_HepG2_LPS_Kac_15cm_ExSen_2hr_ooo	9454
P27797	Calreticulin	CALR	1	76.478	1	K	_GK(ac)NVLINK_	153	2	P27797_153	2	0.7252	4.7256	0.84752	5.5758	1	VIFNYKGKNVLINKD	200719_HepG2_LPS_Kac_15cm_ExSen_2hr_ooo	4910
P35579	Myosin-9	MYH9	1	63.473	1	K	_K(ac)FDQLLAEEK_	1445	1	P35579_1445	2	-1.1821	2.6092	0.81536	3.20006	1	NLEKKQKKFDQLLAE	200719_HepG2_LPS_Kac_15cm_ExSen_2hr_ooo	10574
Q32Q12	Nucleoside diphosphate kinase	NME1-NME2	1	100.19	1	K	_FEQK(ac)GFR_	56	4	Q32Q12_56	2	-0.18212	3.5763	1.16895	3.05941	1	IIKRFEQKGFRLVGL	200719_HepG2_LPS_Kac_15cm_ExSen_2hr_ooo	5204
P53567	CCAAT/enhancer-binding protein gamma	CEBPG	1	104.89	1	K	_AVAPSK(ac)QSK_	50	6	P53567_50	2	-0.015939	1.8489	0.67054	2.75733	1	GKAVAPSKQSKKSSP	200719_HepG2_LPS_Kac_15cm_ExSen_2hr_ooo	2169
P42330	Aldo-keto reductase family 1 member C3	AKR1C3	1	72.2	1	K	_SK(ac)IADGSVK_	68	2	P42330_68	2	0.22547	2.4644	0.93533	2.63479	1	VGLAIRSKIADGSVK	200719_HepG2_LPS_Kac_15cm_ExSen_2hr_ooo	3209
A0A1X7SBS1	Heterogeneous nuclear ribonucleoprotein U	HNRNPU	0.817573	68.751	1	K	_K(ac)AEVEGKDLPEHAVLK_	539	1	A0A1X7SBS1_539	3	-0.11847	2.5858	1.003	2.57807	1	YKQRTQKKAEVEGKD	20190709_HepG2_LPS_SILAC_KacIP_CID_120min_AS_2nd	9190
P42766	60S ribosomal protein L35	RPL35	1	75.652	1	K	_LNK(ac)HEENLK_	97	3	P42766_97	3	1.9004	2.4199	0.974365	2.48357	1	AMRRRLNKHEENLKT	20190617_HepG2_LPS_SILAC_KacIP_CID_120min_AS_2nd	1940
P39023	60S ribosomal protein L3	RPL3	1	41.242	1	K	_FIDTTSK(ac)FGHGR_	373	7	P39023_373	3	0.7722	2.4036	1.0408	2.30938	1	KFIDTTSKFGHGRFQ	200719_HepG2_LPS_Kac_15cm_ExSen_2hr_ooo	7236
P07237	Protein disulfide-isomerase	P4HB	1	76.228	1	K	_TAAESFK(ac)GK_	283	7	P07237_283	2	0.49786	2.1493	0.983695	2.18493	1	KTAAESFKGKILFIF	200719_HepG2_LPS_Kac_15cm_ExSen_2hr_ooo	3613
C9J9K3	40S ribosomal protein SA	RPSA	1	118.66	1	K	_AVLK(ac)FAAATGATPIAGR_	89	4	C9J9K3_89	2	1.7731	2.2348	1.0704	2.08782	1	TGQRAVLKFAAATGA	200719_HepG2_LPS_Kac_15cm_ExSen_2hr_ooo	12872
P32119	Peroxiredoxin-2	PRDX2	1	119.88	1	K	_ATAVVDGAFK(ac)EVK_	26	10	P32119_26	2	0.55978	2.0054	0.970915	2.06547	1	AVVDGAFKEVKLSDY	200719_HepG2_LPS_Kac_15cm_ExSen_2hr_ooo	9469
P06733	Alpha-enolase	ENO1	1	171.15	1	K	_IDK(ac)LM(ox)IEM(ox)DGTENK_	92	3	P06733_92	2	0.58929	1.7975	0.8785	2.0461	1	TEQEKIDKLMIEMDG	20190617_HepG2_LPS_SILAC_KacIP_CID_120min_AS_2nd	20139
P04075	Fructose-bisphosphate aldolase A	ALDOA	1	113.62	1	K	_AAQEEYVK(ac)R_	330	8	P04075_330	2	0.38411	1.8622	0.911145	2.0438	1	AAQEEYVKRALANSL	200719_HepG2_LPS_Kac_15cm_ExSen_2hr_ooo	3558
P07900	Heat shock protein HSP 90-alpha	HSP90AA1	1	66.056	1	K	_FYEQFSK(ac)NIK_	443	7	P07900_443	2	1.5884	2.1549	1.0581	2.03657	1	KFYEQFSKNIKLGIH	200719_HepG2_LPS_Kac_15cm_ExSen_2hr_ooo	10002
P14618	Pyruvate kinase PKM	PKM	1	43.68	1	K	_EM(ox)IK(ac)SGM(ox)NVAR_	66	4	P14618_66	2	-0.23758	1.7901	0.893515	2.00344	1	ETLKEMIKSGMNVAR	200719_HepG2_LPS_Kac_15cm_ExSen_2hr_ooo	3470
P08133	Annexin A6	ANXA6	1	81.92	1	K	_GAGTDEK(ac)TLTR_	620	7	P08133_620	2	1.3868	2.1599	1.11805	1.93185	1	KGAGTDEKTLTRIMV	200719_HepG2_LPS_Kac_15cm_ExSen_2hr_ooo	3845
P14618	Pyruvate kinase PKM	PKM	1	41.164	1	K	_VFLAQK(ac)M(ox)M(ox)IGR_	311	6	P14618_311	2	-0.41292	1.723	0.893515	1.92834	1	EKVFLAQKMMIGRCN	200719_HepG2_LPS_Kac_15cm_ExSen_2hr_ooo	9167
P31948	Stress-induced-phosphoprotein 1	STIP1	1	87.258	1	K	_NPVIAQK(ac)IQK_	530	7	P31948_530	2	0.63582	1.7753	0.92436	1.92057	1	KNPVIAQKIQKLMDV	200719_HepG2_LPS_Kac_15cm_ExSen_2hr_ooo	6450
A0A0U1RQF0	3-hydroxyacyl-[acyl-carrier-protein] dehydratase	FASN	1	125.03	1	K	_LGMLSPEGTCK(ac)AFDTAGNGYCR_	213	11	A0A0U1RQF0_213	3	-0.11637	1.9583	1.0197	1.92047	3	LSPEGTCKAFDTAGN	20190709_HepG2_LPS_SILAC_KacIP_CID_120min_AS_2nd	20631
F8W8D4	NEDD8-activating enzyme E1 catalytic subunit	UBA3	1	47.037	1	K	_SPAITATLEGK(ac)NR_	368	11	F8W8D4_368	2	-1.8169	1.875	0.97637	1.92038	1	ITATLEGKNRTLYLQ	200719_HepG2_LPS_Kac_15cm_ExSen_2hr_ooo	8352
P62701	40S ribosomal protein S4, X isoform	RPS4X	1	61.78	1	K	_ITPEEAK(ac)YK_	120	7	P62701_120	2	0.13711	2.1036	1.1012	1.91028	1	RITPEEAKYKLCKVR	200719_HepG2_LPS_Kac_15cm_ExSen_2hr_ooo	4782
O60701	UDP-glucose 6-dehydrogenase	UGDH	1	84.479	1	K	_IVTEK(ac)STVPVR_	129	5	O60701_129	2	1.5736	1.8682	1.01913	1.83313	1	GYKIVTEKSTVPVRA	200719_HepG2_LPS_Kac_15cm_ExSen_2hr_ooo	6405
P14618	Pyruvate kinase PKM	PKM	1	61.235	1	K	_IISK(ac)IENHEGVR_	270	4	P14618_270	3	-0.56929	1.5843	0.893515	1.77311	1	KNIKIISKIENHEGV	200719_HepG2_LPS_Kac_15cm_ExSen_2hr_ooo	5648
P61978	Heterogeneous nuclear ribonucleoprotein K	HNRNPK	1	53.034	1	K	_DLAGSIIGK(ac)GGQR_	405	9	P61978_405	2	0.46992	1.7598	0.9942	1.77007	1	LAGSIIGKGGQRIKQ	20200603_LPS_SILAC_Kac_IP_Combine_120min	5363
H0YNP9	Guanosine-3',5'-bis	HDDC3	1	78.848	1	K	_RK(ac)DPEGTPYINHPIGVAR_	25	2	H0YNP9_25	3	0.24394	1.462	0.83152	1.75823	1	KHRQQRRKDPEGTPY	20190709_HepG2_LPS_SILAC_KacIP_CID_120min_AS_3rd	9760
P26641	Elongation factor 1-gamma	EEF1G	1	65.179	1	K	_LCEK(ac)M(ox)AQFDAK_	212	4	P26641_212	2	-0.84104	1.751	1.00516	1.74202	1	GEVKLCEKMAQFDAK	200719_HepG2_LPS_Kac_15cm_ExSen_2hr_ooo	5917
P30101	Protein disulfide-isomerase A3	PDIA3	1	68.972	1	K	_TVAYTEQK(ac)M(ox)TSGK_	226	8	P30101_226	2	0.50018	1.667	0.960995	1.73466	1	TVAYTEQKMTSGKIK	200719_HepG2_LPS_Kac_15cm_ExSen_2hr_ooo	3642
E9PL71	Elongation factor 1-delta	EEF1D	1	74.92	1	K	_FK(ac)YDDAER_	17	2	E9PL71_17	2	0.50204	1.697	0.9808	1.73022	1	KIWFDKFKYDDAERR	200719_HepG2_LPS_Kac_15cm_ExSen_2hr_ooo	5142
O75891	Cytosolic 10-formyltetrahydrofolate dehydrogenase	ALDH1L1	1	62.792	1	K	_QSGFGK(ac)DLGEAALNEYLR_	882	6	O75891_882	3	-0.24432	1.5084	0.87817	1.71766	2	FKQSGFGKDLGEAAL	20190709_HepG2_LPS_SILAC_KacIP_CID_120min_AS_1st	28372
H0Y612	E3 ubiquitin-protein ligase TRIM33	TRIM33	1	118.61	1	K	_TSLSFK(ac)SDQVK_	530	6	H0Y612_530	2	3.6682	1.1472	0.67418	1.70162	5	EKTSLSFKSDQVKVK	20190617_HepG2_LPS_SILAC_KacIP_CID_120min_AS_2nd	10828
P25788	Proteasome subunit alpha type-3	PSMA3	1	51.726	1	K	_IIYIVHDEVK(ac)DK_	206	10	P25788_206	3	-0.77643	1.8312	1.08025	1.69516	1	YIVHDEVKDKAFELE	200719_HepG2_LPS_Kac_15cm_ExSen_2hr_ooo	8225
P06748	Nucleophosmin	NPM1	1	111.17	1	K	_GQESFK(ac)K_	229	6	P06748_229	2	-0.74526	1.6735	0.998465	1.67607	1	SKGQESFKKQEKTPK	20200603_LPS_SILAC_Kac_IP_Combine_120min	617
Q9UIG0	Tyrosine-protein kinase BAZ1B	BAZ1B	1	102.4	1	K	_VENGLGK(ac)TDR_	817	7	Q9UIG0_817	2	-0.026519	1.492	0.891735	1.67314	1	KVENGLGKTDRKKEI	200719_HepG2_LPS_Kac_15cm_ExSen_2hr_ooo	3573
I3L387	Serine/threonine-protein kinase PLK1	PLK1	1	72.531	1	K	_(ac)SAAVTAGK(ac)LAR_	9	8	I3L387_9	2	0.011374	1.224	0.73462	1.66617	1	SAAVTAGKLARAPAD	200719_HepG2_LPS_Kac_15cm_ExSen_2hr_ooo	9944
P26641	Elongation factor 1-gamma	EEF1G	1	62.088	1	K	_QATENAK(ac)EEVR_	132	7	P26641_132	2	-0.32166	1.6664	1.00516	1.65785	1	KQATENAKEEVRRIL	200719_HepG2_LPS_Kac_15cm_ExSen_2hr_ooo	3441
P00390	Glutathione reductase, mitochondrial	GSR	1	79.837	1	K	_LNAIYQNNLTK(ac)SHIEIIR_	164	11	P00390_164	3	-0.83372	1.6638	1.01545	1.63849	1	IYQNNLTKSHIEIIR	20200603_LPS_SILAC_Kac_IP_Combine_120min	6676
B4DK69	Aldo-keto reductase family 1 member C2	AKR1C2	1	51.286	1	K	_LLEM(ox)ILNK(ac)PGLK_	153	8	B4DK69_153	2	-0.3333	1.6049	0.98144	1.63525	1	LLEMILNKPGLKYKP	200719_HepG2_LPS_Kac_15cm_ExSen_2hr_ooo	14262
H7C2W9	60S ribosomal protein L31	RPL31	1	106.36	1	K	_LNK(ac)AVWAK_	58	3	H7C2W9_58	2	-0.16306	1.7849	1.098	1.62559	1	RIDTRLNKAVWAKGI	200719_HepG2_LPS_Kac_15cm_ExSen_2hr_ooo	7150
P08238	Heat shock protein HSP 90-beta	HSP90AB1	1	115.09	1	K	_ELISNASDALDK(ac)IR_	53	12	P08238_53	2	-0.089143	1.5977	0.9839	1.62384	1	NASDALDKIRYESLT	200719_HepG2_LPS_Kac_15cm_ExSen_2hr_ooo	13861
Q16695	Histone H3.1t	H3-4	1	125.68	2	K	_K(ac)QLATK(ac)VAR_	19	1	Q16695_19	2	-0.44876	2.4331	1.5014	1.62055	9	TGGKAPRKQLATKVA	20190613_HepG2_LPS_SILAC_KacIP_CID_120min_AS_2nd-1	6283
P00558	Phosphoglycerate kinase 1	PGK1	1	65.627	1	K	_LTLDK(ac)LDVK_	11	5	P00558_11	2	0.5937	1.5549	0.960415	1.61899	1	SNKLTLDKLDVKGKR	200719_HepG2_LPS_Kac_15cm_ExSen_2hr_ooo	11314
Q01581	Hydroxymethylglutaryl-CoA synthase, cytoplasmic	HMGCS1	1	78.516	1	K	_LVQK(ac)SLAR_	273	4	Q01581_273	2	-0.091613	1.8059	1.12165	1.61004	2	PYCKLVQKSLARMLL	200719_HepG2_LPS_Kac_15cm_ExSen_2hr_ooo	4798
B4DK69	Aldo-keto reductase family 1 member C2	AKR1C2	1	79.489	1	K	_SK(ac)DIVLVAYSALGSHR_	183	2	B4DK69_183	3	0.14486	1.5754	0.98144	1.60519	1	LLDFCKSKDIVLVAY	20200603_LPS_SILAC_Kac_IP_Combine_120min	8393
P19338	Nucleolin	NCL	1	127.83	1	K	_K(ac)FGYVDFESAEDLEK_	348	1	P19338_348	2	1.1684	1.6144	1.01775	1.58624	9	VRIGMTRKFGYVDFE	20200603_LPS_SILAC_Kac_IP_Combine_120min	8117
O43865	S-adenosylhomocysteine hydrolase-like protein 1	AHCYL1	1	156.72	1	K	_K(ac)QIQFADDMQEFTKFPTK_	40	1	O43865_40	3	0.24432	1.3777	0.87406	1.57621	1	TVTKAPKKQIQFADD	20190617_HepG2_LPS_SILAC_KacIP_CID_120min_AS_1st	22927
M0QZC5	40S ribosomal protein S11	RPS11	1	77.662	1	K	_YYK(ac)NIGLGFK_	38	3	M0QZC5_38	2	1.575	1.7357	1.1106	1.56285	2	EKLPRYYKNIGLGFK	200719_HepG2_LPS_Kac_15cm_ExSen_2hr_ooo	11888
J3QKT4	Pyrroline-5-carboxylate reductase	PYCR1	1	89.721	1	K	_LGAQALLGAAK(ac)M(ox)LLHSEQHPGQLK_	185	11	J3QKT4_185	4	-0.33505	1.4501	0.92956	1.55999	1	QALLGAAKMLLHSEQ	20200603_LPS_SILAC_Kac_IP_Combine_120min	10413
P51659	Peroxisomal multifunctional enzyme type 2	HSD17B4	1	112.44	1	K	_VVK(ac)TALDAFGR_	84	3	P51659_84	2	-0.021919	1.346	0.86474	1.55654	2	EEGEKVVKTALDAFG	20200603_LPS_SILAC_Kac_IP_Combine_120min	5097
P60709	Actin, cytoplasmic 1	ACTB	1	44.252	1	K	_M(ox)QK(ac)EITALAPSTM(ox)K_	315	3	P60709_315	2	-0.83198	1.4784	0.951655	1.5535	1	GIADRMQKEITALAP	200719_HepG2_LPS_Kac_15cm_ExSen_2hr_ooo	8178
P0DMV9	Heat shock 70 kDa protein 1B	HSPA1B	1	70.056		K	_LSK(ac)EEIER_	512	3	P0DMV9_512	2	-1.533	1.7871	1.1506	1.55319	1	NDKGRLSKEEIERMV	200719_HepG2_LPS_Kac_15cm_ExSen_2hr_ooo	5870
A0A0U1RQF0	3-hydroxyacyl-[acyl-carrier-protein] dehydratase	FASN	1	49.125	1	K	_LSPDAIPGK(ac)WTSQDSLLGMEFSGR_	1589	9	A0A0U1RQF0_1589	3	-0.23826	1.5777	1.0197	1.54722	1	SPDAIPGKWTSQDSL	20190709_HepG2_LPS_SILAC_KacIP_CID_120min_AS_3rd	31564
P10809	60 kDa heat shock protein, mitochondrial	HSPD1	1	110.12	1	K	_TLNDELEIIEGM(ox)K(ac)FDR_	218	13	P10809_218	3	-0.75542	1.4561	0.954885	1.5249	1	LEIIEGMKFDRGYIS	20200603_LPS_SILAC_Kac_IP_Combine_120min	10014
P08238	Heat shock protein HSP 90-beta	HSP90AB1	1	67.385	1	K	_DNSTM(ox)GYM(ox)M(ox)AK(ac)K_	623	11	P08238_623	2	-0.048695	1.4984	0.9839	1.52292	1	TMGYMMAKKHLEINP	200719_HepG2_LPS_Kac_15cm_ExSen_2hr_ooo	3178
H0YBG2	Pyridoxal phosphate homeostasis protein	PLPBP	1	73.435	1	K	_LADK(ac)VNSSWQR_	44	4	H0YBG2_44	2	-0.33229	1.4283	0.93871	1.52156	1	DSVKLADKVNSSWQR	200719_HepG2_LPS_Kac_15cm_ExSen_2hr_ooo	7374
P33778	Histone H2B type 1-B	H2BC3	1	104.22	2	K	_GSK(ac)K(ac)AITK_	16	3	P33778_16	2	-1.0595	1.9178	1.2609	1.52098	2	PAPKKGSKKAITKAQ	20190613_HepG2_LPS_SILAC_KacIP_CID_120min_AS_2nd-1	2139
P62979	Ubiquitin-40S ribosomal protein S27a	RPS27A	1	73.26	1	K	_LAVLK(ac)YYK_	104	5	P62979_104	2	0.51583	1.6707	1.1	1.51882	1	KVKLAVLKYYKVDEN	200719_HepG2_LPS_Kac_15cm_ExSen_2hr_ooo	10170
E9PNF3	4'-phosphopantetheinyl transferase	AASDHPPT	1	170.95	1	K	_K(ac)FTNKEWETIR_	86	1	E9PNF3_86	2	-0.62374	1.2202	0.81199	1.50273	6	FFHIMKRKFTNKEWE	20190709_HepG2_LPS_SILAC_KacIP_CID_120min_AS_2nd	10823
O75874	Isocitrate dehydrogenase [NADP] cytoplasmic	IDH1	1	91.095	1	K	_QYK(ac)SQFEAQK_	236	3	O75874_236	2	-1.0888	1.592	1.06015	1.50167	1	EIYDKQYKSQFEAQK	200719_HepG2_LPS_Kac_15cm_ExSen_2hr_ooo	4863
P13639	Elongation factor 2	EEF2	1	61.167	1	K	_K(ac)LWGDRYFDPANGK_	259	1	P13639_259	3	0.3272	1.5088	1.0093	1.4949	1	KVEDMMKKLWGDRYF	20190709_HepG2_LPS_SILAC_KacIP_CID_120min_AS_1st	17147
P09429	High mobility group protein B1	HMGB1	1	213.83	1	K	_GK(ac)M(ox)SSYAFFVQTCR_	12	2	P09429_12	2	-0.093128	1.4015	0.94029	1.4905	11	DPKKPRGKMSSYAFF	20190613_HepG2_LPS_SILAC_KacIP_CID_120min_AS_1st-1	19894
Q08426	Peroxisomal bifunctional enzyme	EHHADH	1	147.49	1	K	_LGILDK(ac)VVNSDPVEEAIR_	171	6	Q08426_171	3	0.2814	1.2956	0.8746	1.48136	3	LKLGILDKVVNSDPV	20190709_HepG2_LPS_SILAC_KacIP_CID_120min_AS_3rd	30677
Q92793	CREB-binding protein	CREBBP	1	72.99	1	K	_WGLGLDDEGSSQGEPQSK(ac)SPQESR_	1762	18	Q92793_1762	3	0.062583	1.3958	0.94392	1.47873	1	SQGEPQSKSPQESRR	20190709_HepG2_LPS_SILAC_KacIP_CID_120min_AS_1st	17798
Q99832	T-complex protein 1 subunit eta	CCT7	1	51.727	1	K	_TATQLAVNK(ac)IK_	135	9	Q99832_135	2	-0.027206	1.5223	1.03245	1.47445	1	ATQLAVNKIKEIAVT	200719_HepG2_LPS_Kac_15cm_ExSen_2hr_ooo	7552
P07237	Protein disulfide-isomerase	P4HB	1	71.879	1	K	_SVSDYDGK(ac)LSNFK_	271	8	P07237_271	2	0.069477	1.4418	0.983695	1.4657	1	SVSDYDGKLSNFKTA	200719_HepG2_LPS_Kac_15cm_ExSen_2hr_ooo	11097
Q14202	Zinc finger MYM-type protein 3	ZMYM3	1	79.875	1	K	_YANGETSK(ac)GDELR_	1086	8	Q14202_1086	2	0.29899	1.2588	0.86403	1.45689	1	YANGETSKGDELRFG	200719_HepG2_LPS_Kac_15cm_ExSen_2hr_ooo	5018
Q08426	Peroxisomal bifunctional enzyme	EHHADH	1	105.19	1	K	_TGK(ac)GWYQYDKPLGR_	577	3	Q08426_577	3	0.399	1.2715	0.8746	1.45381	3	RFGQKTGKGWYQYDK	20190709_HepG2_LPS_SILAC_KacIP_CID_120min_AS_2nd	12758
H0Y612	E3 ubiquitin-protein ligase TRIM33	TRIM33	0.978686	138.55	1	K	_K(ac)GKTAQGLSPVDQR_	712	1	H0Y612_712	3	-0.77608	0.97384	0.67418	1.44448	4	DNLQHSKKGKTAQGL	200719_HepG2_LPS_Kac_15cm_ExSen_2hr_ooo	4044
P11142	Heat shock cognate 71 kDa protein	HSPA8	1	70.908	1	K	_M(ox)VQEAEK(ac)YK_	524	7	P11142_524	2	-0.54636	1.4409	0.99867	1.44282	1	RMVQEAEKYKAEDEK	200719_HepG2_LPS_Kac_15cm_ExSen_2hr_ooo	3204
P22626	Heterogeneous nuclear ribonucleoproteins A2/B1	HNRNPA2B1	1	80.632	1	K	_LFVGGIK(ac)EDTEEHHLR_	120	7	P22626_120	4	0.11401	1.3251	0.92694	1.42954	9	KLFVGGIKEDTEEHH	20200603_LPS_SILAC_Kac_IP_Combine_120min	4146
Q13247	Serine/arginine-rich splicing factor 6	SRSF6	1	97.69	1	K	_ALDK(ac)LDGTEINGR_	165	4	Q13247_165	2	-1.451	1.6346	1.15045	1.42084	1	DMKRALDKLDGTEIN	200719_HepG2_LPS_Kac_15cm_ExSen_2hr_ooo	9303
P08238	Heat shock protein HSP 90-beta	HSP90AB1	1	74.841	1	K	_FYEAFSK(ac)NLK_	435	7	P08238_435	2	-0.22494	1.3963	0.9839	1.41915	1	KFYEAFSKNLKLGIH	200719_HepG2_LPS_Kac_15cm_ExSen_2hr_ooo	10948
P47914	60S ribosomal protein L29	RPL29	1	89.911	1	K	_AQAAAPASVPAQAPK(ac)R_	149	15	P47914_149	2	0.46916	1.0685	0.753215	1.41859	1	SVPAQAPKRTQAPTK	200719_HepG2_LPS_Kac_15cm_ExSen_2hr_ooo	5336
B7WP74	Pre-mRNA-splicing factor CWC22 homolog	CWC22	1	44.252	1	K	_M(ox)M(ox)QEQITDK(ac)NSLAYQR_	149	9	B7WP74_149	3	0.29894	1.2054	0.85062	1.41708	1	MQEQITDKNSLAYQR	200719_HepG2_LPS_Kac_15cm_ExSen_2hr_ooo	8124
M0R3F6	SURP and G-patch domain-containing protein 2	SUGP2	1	118.28	1	K	_VIEGSLSPK(ac)ER_	605	9	M0R3F6_605	2	0.73881	0.95752	0.67631	1.4158	3	IEGSLSPKERTLLKE	20190709_HepG2_LPS_SILAC_KacIP_CID_120min_AS_1st	8092
A0A0U1RQF0	3-hydroxyacyl-[acyl-carrier-protein] dehydratase	FASN	1	82.831	1	K	_WK(ac)AGLYGLPR_	41	2	A0A0U1RQF0_41	2	-0.11294	1.4436	1.0197	1.41571	1	TDDDRRWKAGLYGLP	20190709_HepG2_LPS_SILAC_KacIP_CID_120min_AS_1st	19003
C9JCD9	Protein BUD31 homolog	BUD31	1	93.374	1	K	_SK(ac)LEVGR_	84	2	C9JCD9_84	2	0.097207	1.3755	0.97233	1.41464	1	ICRVPKSKLEVGRII	200719_HepG2_LPS_Kac_15cm_ExSen_2hr_ooo	4224
P62979	Ubiquitin-40S ribosomal protein S27a	RPS27A	1	117.2	1	K	_M(ox)QIFVK(ac)TLTGK_	6	6	P62979_6	2	-0.39306	1.5552	1.1	1.41382	1	MQIFVKTLTGKTI	20200603_LPS_SILAC_Kac_IP_Combine_120min	5328
A0A0U1RQF0	3-hydroxyacyl-[acyl-carrier-protein] dehydratase	FASN	1	96.113	1	K	_AK(ac)YHGNVMLLR_	2436	2	A0A0U1RQF0_2436	3	0.096101	1.4316	1.0197	1.40394	1	EQYTPKAKYHGNVML	20190709_HepG2_LPS_SILAC_KacIP_CID_120min_AS_2nd	9506
P27797	Calreticulin	CALR	1	62.035	1	K	_SDFGK(ac)FVLSSGK_	48	5	P27797_48	2	-0.1746	1.185	0.84752	1.3982	2	KHKSDFGKFVLSSGK	20200603_LPS_SILAC_Kac_IP_Combine_120min	6107
P0DMV9	Heat shock 70 kDa protein 1B	HSPA1B	1	45.347	1	K	_LDK(ac)AQIHDLVLVGGSTR_	328	3	P0DMV9_328	3	-0.60972	1.5989	1.1506	1.38962	2	LRDAKLDKAQIHDLV	200719_HepG2_LPS_Kac_15cm_ExSen_2hr_ooo	13301
E9PFN5	Glutathione S-transferase kappa	GSTK1	0.999334	113.4	1	K	_VK(ac)NQLKETTEAACR_	165	2	E9PFN5_165	3	-1.2611	1.2721	0.91774	1.38612	2	KIATPKVKNQLKETT	20190709_HepG2_LPS_SILAC_KacIP_CID_120min_AS_3rd	5335
Q9P0Z9	Peroxisomal sarcosine oxidase	PIPOX	1	108.57	1	K	_ISRFPSLGK(ac)AHL_	387	9	Q9P0Z9_387	3	-0.45569	1.1747	0.84944	1.38291	6	SRFPSLGKAHL	20200603_LPS_SILAC_Kac_IP_Combine_120min	5757
P12004	Proliferating cell nuclear antigen	PCNA	1	199.37	1	K	_ILK(ac)CAGNEDIITLR_	80	3	P12004_80	2	0.06419	1.2532	0.91111	1.37547	11	TSMSKILKCAGNEDI	20200603_LPS_SILAC_Kac_IP_Combine_120min	6283
P13639	Elongation factor 2	EEF2	1	51.066	1	K	_IK(ac)PVLM(ox)M(ox)NK_	152	2	P13639_152	2	0.50816	1.382	1.0093	1.36927	1	QAIAERIKPVLMMNK	200719_HepG2_LPS_Kac_15cm_ExSen_2hr_ooo	5395
P10809	60 kDa heat shock protein, mitochondrial	HSPD1	1	74.173	1	K	_IGIEIIK(ac)R_	469	7	P10809_469	2	0.91414	1.3039	0.954885	1.3655	2	KIGIEIIKRTLKIPA	20190709_HepG2_LPS_SILAC_KacIP_CID_120min_AS_2nd	26652
P10412	Histone H1.4	H1-4	1	137.46	1	K	_LGLK(ac)SLVSK_	85	4	P10412_85	2	-0.32021	1.1821	0.86769	1.36235	9	SRIKLGLKSLVSKGT	20190709_HepG2_LPS_SILAC_KacIP_CID_120min_AS_3rd	15686
Q14151	Scaffold attachment factor B2	SAFB2	1	135.86	1	K	_ADSLLAVVK(ac)REPAEQPGDGER_	293	9	Q14151_293	3	0.84444	1.1511	0.85008	1.35411	9	DSLLAVVKREPAEQP	20200603_LPS_SILAC_Kac_IP_Combine_120min	5742
J3KTF8	Rho GDP-dissociation inhibitor 1	ARHGDIA	1	176.42	1	K	_IDK(ac)TDYM(ox)VGSYGPR_	141	3	J3KTF8_141	2	1.1935	1.313	0.97037	1.35309	1	RKGVKIDKTDYMVGS	20190709_HepG2_LPS_SILAC_KacIP_CID_120min_AS_3rd	17440
P55072	Transitional endoplasmic reticulum ATPase	VCP	1	78.516	1	K	_VAILK(ac)ANLR_	658	5	P55072_658	2	0.08925	1.407	1.0464	1.34461	1	KSRVAILKANLRKSP	200719_HepG2_LPS_Kac_15cm_ExSen_2hr_ooo	9330
P53396	ATP-citrate synthase	ACLY	1	89.55	1	K	_LK(ac)QGLYR_	1080	2	P53396_1080	2	0.55214	1.4921	1.11085	1.34321	3	YLDQKRLKQGLYRHP	20200603_LPS_SILAC_Kac_IP_Combine_120min	1804
P04075	Fructose-bisphosphate aldolase A	ALDOA	1	100.88	1	K	_GGVVGIK(ac)VDK_	108	7	P04075_108	2	-0.4656	1.2181	0.911145	1.33689	6	KGGVVGIKVDKGVVP	20190709_HepG2_LPS_SILAC_KacIP_CID_120min_AS_1st	24353
Q8IY81	pre-rRNA 2'-O-ribose RNA methyltransferase FTSJ3	FTSJ3	1	114.86	1	K	_TVTELVTK(ac)K_	233	8	Q8IY81_233	2	-1.5991	1.1447	0.857795	1.33447	1	TVTELVTKKKPKAEG	200719_HepG2_LPS_Kac_15cm_ExSen_2hr_ooo	6513
P05455	Lupus La protein	SSB	1	95.531	1	K	_GK(ac)VQFQGK_	354	2	P05455_354	2	1.0514	1.4104	1.05895	1.33189	1	QPGSGKGKVQFQGKK	200719_HepG2_LPS_Kac_15cm_ExSen_2hr_ooo	3804
H9KV75	Alpha-actinin cytoskeletal isoform	ACTN1	1	62.525		K	_K(ac)HEAFESDLAAHQDR_	371	1	H9KV75_371	3	0.142	1.3583	1.0251	1.32504	1	EIKALLKKHEAFESD	20190617_HepG2_LPS_SILAC_KacIP_CID_120min_AS_2nd	6490
A0A096LNH5	Glutamine amidotransferase-like class 1 domain-containing protein 3B, mitochondrial	GATD3B	1	69.03	1	K	_EVVEAHVDQK(ac)NK_	147	10	A0A096LNH5_147	3	0.46805	0.99266	0.75044	1.32277	1	VEAHVDQKNKVVTTP	200719_HepG2_LPS_Kac_15cm_ExSen_2hr_ooo	3311
Q96ST3	Paired amphipathic helix protein Sin3a	SIN3A	1	77.279	1	K	_LLFSNTAAQK(ac)LR_	875	10	Q96ST3_875	2	-1.5691	1.4849	1.1239	1.3212	2	FSNTAAQKLRGMDEV	200719_HepG2_LPS_Kac_15cm_ExSen_2hr_ooo	11956
P11021	Endoplasmic reticulum chaperone BiP	HSPA5	1	101.39	1	K	_NK(ac)ITITNDQNR_	523	2	P11021_523	2	0.017742	1.4323	1.0849	1.32021	1	KGTGNKNKITITNDQ	200719_HepG2_LPS_Kac_15cm_ExSen_2hr_ooo	5100
Q16695	Histone H3.1t	H3-4	1	125.68	2	K	_KQLATK(ac)VAR_	24	6	Q16695_24	2	-0.93825	1.9798	1.5014	1.31864	1	PRKQLATKVARKSAP	20190613_HepG2_LPS_SILAC_KacIP_CID_120min_AS_2nd-1	6283
E7ES08	High mobility group protein B3	HMGB3	1	97.223	1	K	_GK(ac)M(ox)SAYAFFVQTCR_	12	2	E7ES08_12	3	-0.84203	1.1996	0.91135	1.31629	1	DPKKPKGKMSAYAFF	20190613_HepG2_LPS_SILAC_KacIP_CID_120min_AS_1st-1	19913
P37837	Transaldolase	TALDO1	1	113.22	1	K	_FAADAVK(ac)LER_	321	7	P37837_321	2	0.080601	1.3346	1.01425	1.31585	1	KFAADAVKLERMLTE	20200603_LPS_SILAC_Kac_IP_Combine_120min	3752
Q92793	CREB-binding protein	CREBBP	1	166.7	2	K	_TNK(ac)NK(ac)SSISR_	1595	3	Q92793_1595	2	0.57982	1.2397	0.94392	1.31335	6	NKKTNKNKSSISRAN	20190617_HepG2_LPS_SILAC_KacIP_CID_120min_AS_1st	2513
Q92793	CREB-binding protein	CREBBP	1	166.7	2	K	_TNK(ac)NK(ac)SSISR_	1597	5	Q92793_1597	2	0.57982	1.2397	0.94392	1.31335	6	NKKTNKNKSSISRAN	20190617_HepG2_LPS_SILAC_KacIP_CID_120min_AS_1st	2513
Q9H307	Pinin	PNN	1	75.548	1	K	_LTEVPVEPVLTVHPESK(ac)SK_	553	17	Q9H307_553	3	0.37094	1.0456	0.79959	1.30767	1	LTVHPESKSKTKTRS	200719_HepG2_LPS_Kac_15cm_ExSen_2hr_ooo	11395
H0Y612	E3 ubiquitin-protein ligase TRIM33	TRIM33	1	239.38	1	K	_GK(ac)TAQGLSPVDQR_	714	2	H0Y612_714	3	0.77723	0.88152	0.67418	1.30754	14	LQHSKKGKTAQGLSP	20190709_HepG2_LPS_SILAC_KacIP_CID_120min_AS_1st	7491
Q99879	Histone H2B type 1-M	H2BC14	1	96.665	2	K	_GSK(ac)K(ac)AINK_	16	3	Q99879_16	2	1.1456	1.6281	1.2477	1.30488	3	PVPKKGSKKAINKAQ	20190613_HepG2_LPS_SILAC_KacIP_CID_120min_AS_1st-2	1371
A0A0U1RQF0	3-hydroxyacyl-[acyl-carrier-protein] dehydratase	FASN	1	77.543	1	K	_QEPLLIGSTK(ac)SNMGHPEPASGLAALAK_	326	10	A0A0U1RQF0_326	3	0.44239	1.3291	1.0197	1.30342	3	PLLIGSTKSNMGHPE	20190709_HepG2_LPS_SILAC_KacIP_CID_120min_AS_1st	23659
Q13263	Transcription intermediary factor 1-beta	TRIM28	1	89.369	1	K	_M(ox)FK(ac)QFNK_	770	3	Q13263_770	2	1.3335	1.0868	0.83762	1.29749	2	QDVGRMFKQFNKLTE	200719_HepG2_LPS_Kac_15cm_ExSen_2hr_ooo	5039
P11142	Heat shock cognate 71 kDa protein	HSPA8	1	137.45	1	K	_LDK(ac)SQIHDIVLVGGSTR_	328	3	P11142_328	3	0.75356	1.2934	0.99867	1.29512	8	LRDAKLDKSQIHDIV	200719_HepG2_LPS_Kac_15cm_ExSen_2hr_ooo	12812
Q9Y2X3	Nucleolar protein 58	NOP58	1	106.4	1	K	_ISGTGK(ac)ALAK_	411	6	Q9Y2X3_411	2	0.66026	1.3866	1.07185	1.29365	1	RKISGTGKALAKTEK	200719_HepG2_LPS_Kac_15cm_ExSen_2hr_ooo	3781
H0YK42	Sorting nexin-1	SNX1	1	150.69	1	K	_EDSSSAEFLEK(ac)R_	19	11	H0YK42_19	2	-0.20581	1.2145	0.93891	1.29352	2	SSAEFLEKRRAALER	20200603_LPS_SILAC_Kac_IP_Combine_120min	3744
Q13268	Dehydrogenase/reductase SDR family member 2, mitochondrial	DHRS2	1	105.13	1	K	_NFK(ac)EHHQLQR_	237	3	Q13268_237	3	-3.6997	1.454	1.12555	1.29181	2	ESLWKNFKEHHQLQR	20200603_LPS_SILAC_Kac_IP_Combine_120min	793
Q14978	Nucleolar and coiled-body phosphoprotein 1	NOLC1	1	98.368	1	K	_QPVGGGQK(ac)LLTR_	415	8	Q14978_415	2	-0.76835	1.2621	0.97724	1.29149	7	QPVGGGQKLLTRKAD	20190613_HepG2_LPS_SILAC_KacIP_CID_120min_AS_1st-2	7249
P49790	Nuclear pore complex protein Nup153	NUP153	1	107.11	1	K	_(ac)ASGAGGVGGGGGGK(ac)IR_	15	14	P49790_15	2	-0.20785	1.1533	0.8971	1.28559	2	VGGGGGGKIRTRRCH	200719_HepG2_LPS_Kac_15cm_ExSen_2hr_ooo	6577
P27797	Calreticulin	CALR	1	146.11	1	K	_NVLINK(ac)DIR_	159	6	P27797_159	2	-0.89952	1.0865	0.84752	1.28198	6	GKNVLINKDIRCKDD	20190613_HepG2_LPS_SILAC_KacIP_CID_120min_AS_2nd-2	10399
P21796	Voltage-dependent anion-selective channel protein 1	VDAC1	1	104.82	1	K	_VTGSLETK(ac)YR_	61	8	P21796_61	2	0.72414	1.4321	1.1201	1.27855	1	VTGSLETKYRWTEYG	200719_HepG2_LPS_Kac_15cm_ExSen_2hr_ooo	5915
E9PFK5	Nucleolar protein 14	NOP14	1	66.504	1	K	_GLISGK(ac)ER_	411	6	E9PFK5_411	2	-1.0507	0.97999	0.76759	1.27671	1	GKGLISGKERAGKAT	200719_HepG2_LPS_Kac_15cm_ExSen_2hr_ooo	4635
P26641	Elongation factor 1-gamma	EEF1G	1	164.13	1	K	_ILGLLDAYLK(ac)TR_	147	10	P26641_147	2	0.70262	1.2793	1.00516	1.27274	5	GLLDAYLKTRTFLVG	20200603_LPS_SILAC_Kac_IP_Combine_120min	10196
P13010	X-ray repair cross-complementing protein 5	XRCC5	1	167.71	1	K	_IAAYK(ac)SILQER_	265	5	P13010_265	2	-0.58088	1.173	0.92214	1.27204	6	SIRIAAYKSILQERV	20190709_HepG2_LPS_SILAC_KacIP_CID_120min_AS_1st	17099
E9PP50	Cofilin, non-muscle isoform	CFL1	1	151.03	1	K	_LTGIK(ac)HELQANCYEEVKDR_	132	5	E9PP50_132	3	-0.74801	1.2839	1.0103	1.27081	6	KKKLTGIKHELQANC	20190617_HepG2_LPS_SILAC_KacIP_CID_120min_AS_2nd	13861
B1AHC9	ATP-dependent DNA helicase 2 subunit 1	XRCC6	1	88.029	1	K	_AIVEK(ac)LR_	418	5	B1AHC9_418	2	0.036262	1.1853	0.93386	1.26925	1	KMKAIVEKLRFTYRS	200719_HepG2_LPS_Kac_15cm_ExSen_2hr_ooo	6634
P61086	Ubiquitin-conjugating enzyme E2 K	UBE2K	1	94.114	1	K	_EFK(ac)EVLK_	14	3	P61086_14	2	-0.54096	1.1336	0.89319	1.26916	1	QRIKREFKEVLKSEE	200719_HepG2_LPS_Kac_15cm_ExSen_2hr_ooo	7427
G3V4F2	Acyl-coenzyme A thioesterase 1	ACOT1	1	65.231	1	K	_ASLRDEK(ac)GALFQAHAR_	42	7	G3V4F2_42	3	-0.12663	1.2566	0.99149	1.26739	1	RASLRDEKGALFQAH	20190709_HepG2_LPS_SILAC_KacIP_CID_120min_AS_1st	14465
Q9GZR7	ATP-dependent RNA helicase DDX24	DDX24	1	96.745	1	K	_QSSCGK(ac)FQTK_	17	6	Q9GZR7_17	2	0.19493	1.2077	0.95458	1.26516	1	PKQSSCGKFQTKGIK	200719_HepG2_LPS_Kac_15cm_ExSen_2hr_ooo	3146
P06576	ATP synthase subunit beta, mitochondrial	ATP5F1B	1	70.942	1	K	_GVQK(ac)ILQDYK_	426	4	P06576_426	2	0.31623	1.2173	0.96249	1.26474	1	DVARGVQKILQDYKS	200719_HepG2_LPS_Kac_15cm_ExSen_2hr_ooo	9549
P10412	Histone H1.4	H1-4	1	198.37	1	K	_SLVSK(ac)GTLVQTK_	90	5	P10412_90	2	-0.82847	1.0974	0.86769	1.26474	8	GLKSLVSKGTLVQTK	20200603_LPS_SILAC_Kac_IP_Combine_120min	4003
Q07021	Complement component 1 Q subcomponent-binding protein, mitochondrial	C1QBP	1	101.53	1	K	_AFVDFLSDEIK(ac)EER_	91	11	Q07021_91	2	0.21626	1.1849	0.938905	1.262	2	DFLSDEIKEERKIQK	20200603_LPS_SILAC_Kac_IP_Combine_120min	9878
P06733	Alpha-enolase	ENO1	1	62.088	1	K	_TAIGK(ac)AGYTDK_	233	5	P06733_233	2	1.4936	1.1083	0.8785	1.26158	1	LLKTAIGKAGYTDKV	200719_HepG2_LPS_Kac_15cm_ExSen_2hr_ooo	4892
Q15648	Mediator of RNA polymerase II transcription subunit 1	MED1	1	66.925	1	K	_GTVM(ox)VGK(ac)PSSHSQYTSSGSVSSSGSK_	1076	7	Q15648_1076	3	0.41099	1.1821	0.94007	1.25746	1	KGTVMVGKPSSHSQY	200719_HepG2_LPS_Kac_15cm_ExSen_2hr_ooo	5502
P11142	Heat shock cognate 71 kDa protein	HSPA8	1	89.831	1	K	_LIGDAAK(ac)NQVAM(ox)NPTNTVFDAK_	56	7	P11142_56	3	-0.34561	1.2554	0.99867	1.25707	3	RLIGDAAKNQVAMNP	200719_HepG2_LPS_Kac_15cm_ExSen_2hr_ooo	12772
Q16822	Phosphoenolpyruvate carboxykinase [GTP], mitochondrial	PCK2	1	81.185	1	K	_VESK(ac)TVIVTPSQR_	108	4	Q16822_108	2	0.28741	1.1966	0.95422	1.25401	2	DVARVESKTVIVTPS	20190709_HepG2_LPS_SILAC_KacIP_CID_120min_AS_1st	9772
A0A0U1RQF0	3-hydroxyacyl-[acyl-carrier-protein] dehydratase	FASN	1	133.65	1	K	_RQQEQQVPILEK(ac)FCFTPHTEEGCLSER_	1116	12	A0A0U1RQF0_1116	4	-0.11194	1.2753	1.0197	1.25066	3	QQVPILEKFCFTPHT	20190709_HepG2_LPS_SILAC_KacIP_CID_120min_AS_3rd	23852
Q9BWD1	Acetyl-CoA acetyltransferase, cytosolic	ACAT2	1	112.39	1	K	_LK(ac)PYFLTDGTGTVTPANASGINDGAAAVVLMK_	235	2	Q9BWD1_235	3	-0.60465	1.2103	0.969235	1.24872	4	IEAMSKLKPYFLTDG	20190709_HepG2_LPS_SILAC_KacIP_CID_120min_AS_3rd	31164
Q96L91	E1A-binding protein p400	EP400	1	92.39	1	K	_HQPASASSTAASPAHPAK(ac)LR_	1553	18	Q96L91_1553	3	-0.15232	1.0553	0.84511	1.24871	1	ASPAHPAKLRAQTTA	20190617_HepG2_LPS_SILAC_KacIP_CID_120min_AS_1st	4225
P31948	Stress-induced-phosphoprotein 1	STIP1	1	73.573	1	K	_DAK(ac)LYSNR_	395	3	P31948_395	2	-0.25867	1.1502	0.92436	1.24432	1	KRNPKDAKLYSNRAA	200719_HepG2_LPS_Kac_15cm_ExSen_2hr_ooo	4128
P11142	Heat shock cognate 71 kDa protein	HSPA8	1	94.66	1	K	_VQVEYK(ac)GETK_	108	6	P11142_108	2	-0.12797	1.2424	0.99867	1.24405	1	PKVQVEYKGETKSFY	200719_HepG2_LPS_Kac_15cm_ExSen_2hr_ooo	4762
A0A087X1D8	Farnesyl pyrophosphate synthase	FDPS	1	183.06	1	K	_EVLEYNAIGGK(ac)YNR_	123	11	A0A087X1D8_123	2	1.0877	1.2531	1.0086	1.24242	6	EYNAIGGKYNRGLTV	20200603_LPS_SILAC_Kac_IP_Combine_120min	5213
O75874	Isocitrate dehydrogenase [NADP] cytoplasmic	IDH1	1	111.31	1	K	_LVSGWVK(ac)PIIIGR_	126	7	O75874_126	2	-0.13722	1.3157	1.06015	1.24105	3	RLVSGWVKPIIIGRH	20200603_LPS_SILAC_Kac_IP_Combine_120min	8921
A0A0A0MT83	Butyryl-CoA dehydrogenase	IVD	1	46.249	1	K	_FLQEHLAPK(ac)AQEIDR_	67	9	A0A0A0MT83_67	3	-0.53793	1.1052	0.89091	1.24053	1	HLAPKAQEIDRSNEF	200719_HepG2_LPS_Kac_15cm_ExSen_2hr_ooo	9438
P68133	Actin, alpha skeletal muscle	ACTA1	1	67.76	1	K	_GILTLK(ac)YPIEHGIITNWDDM(ox)EK_	70	6	P68133_70	3	-0.022776	1.3687	1.1061	1.23741	1	KRGILTLKYPIEHGI	20200603_LPS_SILAC_Kac_IP_Combine_120min	10146
P30084	Enoyl-CoA hydratase, mitochondrial	ECHS1	1	83.53	1	K	_FLK(ac)HWDHLTQVK_	118	3	P30084_118	4	0.2696	1.2962	1.05555	1.22799	5	CYSSKFLKHWDHLTQ	20190709_HepG2_LPS_SILAC_KacIP_CID_120min_AS_1st	13012
P30044	Peroxiredoxin-5, mitochondrial	PRDX5	1	66.738	1	K	_THLPGFVEQAEALK(ac)AK_	116	14	P30044_116	3	0.79942	1.169	0.95312	1.2265	1	VEQAEALKAKGVQVV	20190709_HepG2_LPS_SILAC_KacIP_CID_120min_AS_1st	21205
P12004	Proliferating cell nuclear antigen	PCNA	1	94.538	1	K	_IADMGHLK(ac)YYLAPK_	248	8	P12004_248	3	0.79539	1.1163	0.91111	1.22521	3	IADMGHLKYYLAPKI	20190709_HepG2_LPS_SILAC_KacIP_CID_120min_AS_2nd	19208
P35580	Myosin-10	MYH10	1	74.987	1	K	_K(ac)LDAQVQELHAK_	1256	1	P35580_1256	3	0.9601	1.0756	0.878615	1.2242	2	ESEHKRKKLDAQVQE	20190709_HepG2_LPS_SILAC_KacIP_CID_120min_AS_2nd	7487
Q08426	Peroxisomal bifunctional enzyme	EHHADH	1	153.14	1	K	_VSDLAGLDVGWK(ac)SR_	532	12	Q08426_532	2	0.70469	1.0701	0.8746	1.22353	4	AGLDVGWKSRKGQGL	20190709_HepG2_LPS_SILAC_KacIP_CID_120min_AS_1st	21930
P06576	ATP synthase subunit beta, mitochondrial	ATP5F1B	1	89.816	1	K	_TREGNDLYHEMIESGVINLK(ac)DATSK_	259	20	P06576_259	4	0.4885	1.1776	0.96249	1.22349	1	ESGVINLKDATSKVA	20190613_HepG2_LPS_SILAC_KacIP_CID_120min_AS_1st-1	29567
Q92793	CREB-binding protein	CREBBP	1	109.48	1;2	K	_WHCTVCEDYDLCINCYNTK(ac)SHAHK(ac)MVK_	1741	24	Q92793_1741	4	0.74609	1.1544	0.94392	1.22298	7	NTKSHAHKMVKWGLG	20190709_HepG2_LPS_SILAC_KacIP_CID_120min_AS_1st	16229
P05141	ADP/ATP translocase 2	SLC25A5	1	138.99	1	K	_QIFLGGVDK(ac)R_	105	9	P05141_105	2	-0.38632	1.3015	1.065	1.22207	10	IFLGGVDKRTQFWLY	20200603_LPS_SILAC_Kac_IP_Combine_120min	4457
Q99832	T-complex protein 1 subunit eta	CCT7	1	84.169	1	K	_IHHSGAK(ac)VVLSK_	287	7	Q99832_287	3	1.3951	1.2605	1.03245	1.22088	1	KIHHSGAKVVLSKLP	20190613_HepG2_LPS_SILAC_KacIP_CID_120min_AS_2nd-1	2253
Q5JP53	Tubulin beta chain	TUBB	1	171.46	1	K	_ISVYYNEATGGK(ac)YVPR_	40	12	Q5JP53_40	2	0.79465	1.1659	0.95637	1.21909	6	YNEATGGKYVPRAIL	20190709_HepG2_LPS_SILAC_KacIP_CID_120min_AS_1st	17563
P62805	Histone H4	H4C1	1	206.74	1	K	_TVTAMDVVYALK(ac)R_	92	12	P62805_92	2	0.98258	1.5234	1.25045	1.21828	9	MDVVYALKRQGRTLY	20190617_HepG2_LPS_SILAC_KacIP_CID_120min_AS_2nd	29586
Q9UK76	Jupiter microtubule associated homolog 1	JPT1	1	73.834	1	K	_(ac)TTTTTFK(ac)GVDPNSR_	8	7	Q9UK76_8	2	0.36247	1.2394	1.01804	1.21744	1	MTTTTTFKGVDPNSR	200719_HepG2_LPS_Kac_15cm_ExSen_2hr_ooo	10889
Q3LXA3	Triokinase/FMN cyclase	TKFC	1	68.972	1	K	_AVK(ac)SAEAAAEATK_	525	3	Q3LXA3_525	2	-1.4028	1.1395	0.93656	1.21669	1	QVLTKAVKSAEAAAE	200719_HepG2_LPS_Kac_15cm_ExSen_2hr_ooo	4317
P55084	Trifunctional enzyme subunit beta, mitochondrial	HADHB	1	98.048	1	K	_K(ac)LM(ox)LDLNK_	181	1	P55084_181	2	0.13705	1.1282	0.929725	1.21348	2	RHSRKMRKLMLDLNK	20200603_LPS_SILAC_Kac_IP_Combine_120min	3552
P06748	Nucleophosmin	NPM1	1	152.34	1	K	_LLSISGK(ac)R_	141	7	P06748_141	2	0.086105	1.2111	0.998465	1.21296	10	KLLSISGKRSAPGGG	20200603_LPS_SILAC_Kac_IP_Combine_120min	2559
E9PP50	Cofilin, non-muscle isoform	CFL1	1	93.649	1	K	_VFNDMK(ac)VR_	19	6	E9PP50_19	2	-0.012896	1.2235	1.0103	1.21103	2	IKVFNDMKVRKSSTP	20200603_LPS_SILAC_Kac_IP_Combine_120min	2649
Q13442	28 kDa heat- and acid-stable phosphoprotein	PDAP1	1	111.46	1	K	_DDATLSGK(ac)R_	172	8	Q13442_172	2	-0.53813	1.0816	0.89439	1.20932	1	DDATLSGKRMQSLSL	200719_HepG2_LPS_Kac_15cm_ExSen_2hr_ooo	3560
Q9BY49	Peroxisomal trans-2-enoyl-CoA reductase	PECR	1	72.2	1	K	_GAGDLSVVK(ac)K_	291	9	Q9BY49_291	2	0.68833	0.94822	0.784505	1.20869	1	AGDLSVVKKMKETFK	200719_HepG2_LPS_Kac_15cm_ExSen_2hr_ooo	5979
H0YA96	Heterogeneous nuclear ribonucleoprotein D0	HNRNPD	1	102.29	1	K	_IFVGGLSPDTPEEK(ac)IR_	101	14	H0YA96_101	2	0.12799	1.0608	0.87883	1.20706	1	SPDTPEEKIREYFGG	200719_HepG2_LPS_Kac_15cm_ExSen_2hr_ooo	13543
P06733	Alpha-enolase	ENO1	1	189.99	1	K	_AVNEK(ac)SCNCLLLK_	335	5	P06733_335	2	0.063067	1.0602	0.8785	1.20683	2	IAKAVNEKSCNCLLL	20200603_LPS_SILAC_Kac_IP_Combine_120min	3997
P12270	Nucleoprotein TPR	TPR	1	108.97	1	K	_LTATTQK(ac)QEQIINTM(ox)TQDLR_	755	7	P12270_755	3	0.060836	1.1522	0.95497	1.20653	5	KLTATTQKQEQIINT	200719_HepG2_LPS_Kac_15cm_ExSen_2hr_ooo	11495
P50395	Rab GDP dissociation inhibitor beta	GDI2	1	62.338	1	K	_VIGVK(ac)SEGEIAR_	269	5	P50395_269	2	0.46541	1.3069	1.08375	1.20591	1	NGKVIGVKSEGEIAR	200719_HepG2_LPS_Kac_15cm_ExSen_2hr_ooo	7502
Q9H1E3	Nuclear ubiquitous casein and cyclin-dependent kinase substrate 1	NUCKS1	1	181.31	1	K	_GK(ac)VGRPTASK_	188	2	Q9H1E3_188	2	1.6193	1.1016	0.918235	1.19969	2	SPVKGKGKVGRPTAS	20200603_LPS_SILAC_Kac_IP_Combine_120min	364
P10809	60 kDa heat shock protein, mitochondrial	HSPD1	1	81.625	1	K	_LK(ac)VGLQVVAVK_	292	2	P10809_292	2	0.065627	1.1445	0.954885	1.19857	1	TLVLNRLKVGLQVVA	20200603_LPS_SILAC_Kac_IP_Combine_120min	5812
P11142	Heat shock cognate 71 kDa protein	HSPA8	1	159.34	1	K	_ITITNDK(ac)GR_	507	7	P11142_507	2	0.93402	1.1957	0.99867	1.19729	5	KITITNDKGRLSKED	20190613_HepG2_LPS_SILAC_KacIP_CID_120min_AS_1st-2	4450
P22234	Multifunctional protein ADE2 [Includes: Phosphoribosylaminoimidazole-succinocarboxamide synthase	PAICS	1	117.52	1	K	_(ac)ATAEVLNIGK(ac)K_	11	10	P22234_11	2	-0.044988	1.3475	1.1265	1.19618	2	AEVLNIGKKLYEGKT	200719_HepG2_LPS_Kac_15cm_ExSen_2hr_ooo	13354
P07900	Heat shock protein HSP 90-alpha	HSP90AA1	1	180.56	1	K	_VILHLK(ac)EDQTEYLEER_	191	6	P07900_191	3	0.49121	1.2652	1.0581	1.19573	10	TKVILHLKEDQTEYL	20190613_HepG2_LPS_SILAC_KacIP_CID_120min_AS_1st-1	16978
P07900	Heat shock protein HSP 90-alpha	HSP90AA1	1	152.63	1	K	_NNIK(ac)LYVR_	362	4	P07900_362	2	0.43094	1.2643	1.0581	1.19488	3	RKKKNNIKLYVRRVF	20200603_LPS_SILAC_Kac_IP_Combine_120min	3187
Q9P016	Thymocyte nuclear protein 1	THYN1	1	68.044	1	K	_LAGTSGSDK(ac)GLSGK_	16	9	Q9P016_16	2	0.9226	1.0024	0.83986	1.19353	1	AGTSGSDKGLSGKRT	200719_HepG2_LPS_Kac_15cm_ExSen_2hr_ooo	4233
A0A0A0MR02	Outer mitochondrial membrane protein porin 2	VDAC2	1	79.659	1	K	_VTGTLETK(ac)YK_	72	8	A0A0A0MR02_72	2	0.35634	1.5276	1.2804	1.19306	1	VTGTLETKYKWCEYG	200719_HepG2_LPS_Kac_15cm_ExSen_2hr_ooo	5669
P68371	Tubulin beta-4B chain	TUBB4B	1	116.96	1	K	_INVYYNEATGGK(ac)YVPR_	58	12	P68371_58	2	0.39983	1.1615	0.977635	1.18807	2	YNEATGGKYVPRAVL	200719_HepG2_LPS_Kac_15cm_ExSen_2hr_ooo	11391
O15355	Protein phosphatase 1G	PPM1G	1	213.38	1	K	_NAGGK(ac)VTM(ox)DGR_	383	5	O15355_383	2	-0.98464	1.0295	0.867225	1.18712	26	RIKNAGGKVTMDGRV	20200603_LPS_SILAC_Kac_IP_Combine_120min	658
P09622	Dihydrolipoyl dehydrogenase, mitochondrial	DLD	1	70.552	1	K	_ILGQK(ac)STDR_	445	5	P09622_445	2	-0.9196	1.1495	0.97184	1.18281	1	MVKILGQKSTDRVLG	200719_HepG2_LPS_Kac_15cm_ExSen_2hr_ooo	3735
H9KV75	Alpha-actinin cytoskeletal isoform	ACTN1	1	79.489	1	K	_LDHLAEK(ac)FR_	333	7	H9KV75_333	3	0.11402	1.2102	1.0251	1.18057	1	RLDHLAEKFRQKASI	20190709_HepG2_LPS_SILAC_KacIP_CID_120min_AS_2nd	9104
O75947	ATP synthase subunit d, mitochondrial	ATP5PD	1	75.064	1	K	_YTAQVDAEEK(ac)EDVK_	95	10	O75947_95	2	-0.19056	0.94053	0.79708	1.17997	1	AQVDAEEKEDVKSCA	200719_HepG2_LPS_Kac_15cm_ExSen_2hr_ooo	9581
Q02252	Methylmalonate-semialdehyde dehydrogenase [acylating], mitochondrial	ALDH6A1	1	66.267	1	K	_LFIGGK(ac)FVESK_	47	6	Q02252_47	2	0.061943	0.98309	0.83352	1.17944	1	VKLFIGGKFVESKSD	200719_HepG2_LPS_Kac_15cm_ExSen_2hr_ooo	12365
Q9BTM1	Histone H2A.J	H2AJ	1	124.08	2	K	_GK(ac)QGGK(ac)VR_	6	2	Q9BTM1_6	2	-0.88982	1.3264	1.125	1.17902	8	MSGRGKQGGKVRA	20190709_HepG2_LPS_SILAC_KacIP_CID_120min_AS_3rd	959
Q9BTM1	Histone H2A.J	H2AJ	1	124.08	2	K	_GK(ac)QGGK(ac)VR_	10	6	Q9BTM1_10	2	-0.88982	1.3264	1.125	1.17902	8	MSGRGKQGGKVRA	20190709_HepG2_LPS_SILAC_KacIP_CID_120min_AS_3rd	959
P50135	Histamine N-methyltransferase	HNMT	1	81.92	1	K	_TSNLENVK(ac)FAWHK_	112	8	P50135_112	3	0.96937	1.0884	0.923325	1.17878	4	TSNLENVKFAWHKET	20190709_HepG2_LPS_SILAC_KacIP_CID_120min_AS_1st	16411
A0A3B3ITZ9	Thyroid hormone receptor-associated protein 3	THRAP3	1	184.01	1	K	_GDFPTGK(ac)SSFSITR_	558	7	A0A3B3ITZ9_558	2	0.53638	1.1723	0.99705	1.17577	6	KGDFPTGKSSFSITR	20190709_HepG2_LPS_SILAC_KacIP_CID_120min_AS_2nd	16288
P09429	High mobility group protein B1	HMGB1	1	126.14	1	K	_K(ac)LGEM(ox)WNNTAADDKQPYEK_	128	1	P09429_128	3	0.71711	1.104	0.94029	1.17411	1	SIGDVAKKLGEMWNN	20190613_HepG2_LPS_SILAC_KacIP_CID_120min_AS_2nd-1	12529
A0A0U1RQF0	3-hydroxyacyl-[acyl-carrier-protein] dehydratase	FASN	1	73.168	1	K	_WVESLK(ac)GILADEDSSRPVWLK_	1427	6	A0A0U1RQF0_1427	3	-0.28723	1.1959	1.0197	1.1728	2	FRWVESLKGILADED	20190709_HepG2_LPS_SILAC_KacIP_CID_120min_AS_3rd	30940
Q9P0L0	Vesicle-associated membrane protein-associated protein A	VAPA	0.999751	42.317	1	K	_EAKPDELM(ox)DSK(ac)LR_	125	11	Q9P0L0_125	3	-1.1278	0.95702	0.81604	1.17276	1	PDELMDSKLRCVFEM	200719_HepG2_LPS_Kac_15cm_ExSen_2hr_ooo	5859
Q5QNZ2	ATP synthase F	ATP5PB	1	102.01	1	K	_SQQALVQK(ac)R_	101	8	Q5QNZ2_101	2	0.33076	1.1182	0.95466	1.17131	1	SQQALVQKRHYLFDV	200719_HepG2_LPS_Kac_15cm_ExSen_2hr_ooo	3743
P33778	Histone H2B type 1-B	H2BC3	1	101.46	2	K	_AITK(ac)AQK(ac)K_	24	7	P33778_24	2	2.7045	1.4766	1.2609	1.17107	3	KAITKAQKKDGKKRK	20200603_LPS_SILAC_Kac_IP_Combine_120min	802
P06733	Alpha-enolase	ENO1	1	67.207	1	K	_SGK(ac)YDLDFK_	256	3	P06733_256	2	0.16701	1.0241	0.8785	1.16574	1	SEFFRSGKYDLDFKS	200719_HepG2_LPS_Kac_15cm_ExSen_2hr_ooo	9670
P49321	Nuclear autoantigenic sperm protein	NASP	1	199.31	1	K	_K(ac)PTDGASSSNCVTDISHLVR_	698	1	P49321_698	3	0.21508	0.97795	0.83916	1.16539	6	VSMIASRKPTDGASS	20200603_LPS_SILAC_Kac_IP_Combine_120min	5203
O00330	Pyruvate dehydrogenase protein X component, mitochondrial	PDHX	1	123.67	1	K	_IVVEEGSK(ac)NIR_	120	8	O00330_120	2	0.22619	1.1802	1.01316	1.16486	3	IVVEEGSKNIRLGSL	20190709_HepG2_LPS_SILAC_KacIP_CID_120min_AS_1st	8909
H0Y488	AT-rich interactive domain-containing protein 1A	ARID1A	1	131.42	1	K	_K(ac)HVTTAEGTPGTTDQEGPPPDGPPEKR_	1496	1	H0Y488_1496	3	0.61411	0.98519	0.84628	1.16414	3	PCPPAPRKHVTTAEG	20200603_LPS_SILAC_Kac_IP_Combine_120min	1915
Q14964	Ras-related protein Rab-39A	RAB39A	1	72.615	1	K	_IK(ac)LQLWDTAGQER_	63	2	Q14964_63	2	0.1818	1.1388	0.97926	1.16292	2	IEPGKRIKLQLWDTA	200719_HepG2_LPS_Kac_15cm_ExSen_2hr_ooo	13292
Q03701	CCAAT/enhancer-binding protein zeta	CEBPZ	1	67.93	1	K	_QLNK(ac)YDPFSR_	695	4	Q03701_695	2	-1.1821	1.0459	0.9012	1.16056	1	KGGKQLNKYDPFSRN	200719_HepG2_LPS_Kac_15cm_ExSen_2hr_ooo	11256
A0A0C4DGA2	Enoyl-CoA delta isomerase 2, mitochondrial	ECI2	1	74.376	1	K	_AK(ac)NNAVLLR_	188	2	A0A0C4DGA2_188	2	-0.42411	1.1518	0.99368	1.15913	1	GGVEEKAKNNAVLLR	200719_HepG2_LPS_Kac_15cm_ExSen_2hr_ooo	5647
A0A3B3ITZ9	Thyroid hormone receptor-associated protein 3	THRAP3	1	107.06	1	K	_VTAYK(ac)AVQEK_	527	5	A0A3B3ITZ9_527	2	0.6253	1.154	0.99705	1.15741	1	NFRVTAYKAVQEKSS	200719_HepG2_LPS_Kac_15cm_ExSen_2hr_ooo	4503
C9JXG8	Ran-specific GTPase-activating protein	RANBP1	1	88.021	1	K	_VAEK(ac)LEALSVK_	132	4	C9JXG8_132	2	-0.314	1.0114	0.87401	1.15719	1	HAEKVAEKLEALSVK	200719_HepG2_LPS_Kac_15cm_ExSen_2hr_ooo	10334
Q08426	Peroxisomal bifunctional enzyme	EHHADH	1	186.46	1	K	_GWYQYDK(ac)PLGR_	584	7	Q08426_584	2	0.35976	1.0106	0.8746	1.1555	11	KGWYQYDKPLGRIHK	20190709_HepG2_LPS_SILAC_KacIP_CID_120min_AS_2nd	15782
P17987	T-complex protein 1 subunit alpha	TCP1	1	77.506	1	K	_DDK(ac)HGSYEDAVHSGALND_	541	3	P17987_541	3	-0.15969	1.1792	1.02305	1.15263	1	HPESKDDKHGSYEDA	200719_HepG2_LPS_Kac_15cm_ExSen_2hr_ooo	7561
Q96L91	E1A-binding protein p400	EP400	1	78.418	1	K	_TAVPPGLSSLPLTSVGNTGM(ox)K(ac)K_	345	21	Q96L91_345	3	-0.98559	0.97393	0.84511	1.15243	6	SVGNTGMKKVPKKLE	20190709_HepG2_LPS_SILAC_KacIP_CID_120min_AS_3rd	23362
A0A087X0X3	Heterogeneous nuclear ribonucleoprotein M	HNRNPM	1	65.179	1	K	_ADILEDK(ac)DGK_	239	7	A0A087X0X3_239	2	0.20756	1.1246	0.9779	1.15002	2	RADILEDKDGKSRGI	20200603_LPS_SILAC_Kac_IP_Combine_120min	2444
P54136	Arginine--tRNA ligase, cytoplasmic	RARS1	1	71.263	1	K	_VIVDFSSPNIAK(ac)EMHVGHLR_	205	12	P54136_205	4	0.28216	1.2249	1.06539	1.14971	3	FSSPNIAKEMHVGHL	20190709_HepG2_LPS_SILAC_KacIP_CID_120min_AS_1st	22261
P60174	Triosephosphate isomerase	TPI1	1	96.673	1	K	_TATPQQAQEVHEK(ac)LR_	225	13	P60174_225	3	-0.015316	1.0611	0.923275	1.14928	3	CKELASQPDVDGFLV	200719_HepG2_LPS_Kac_15cm_ExSen_2hr_ooo	5585
E7ENZ3	T-complex protein 1 subunit epsilon	CCT5	1	85.67	1	K	_LEDTK(ac)LIK_	168	5	E7ENZ3_168	2	0.48538	1.1647	1.0136	1.14907	1	GGRLEDTKLIKGVIV	200719_HepG2_LPS_Kac_15cm_ExSen_2hr_ooo	6857
P13010	X-ray repair cross-complementing protein 5	XRCC5	1	121.99	1	K	_EEASGSSVTAEEAK(ac)K_	702	14	P13010_702	2	-0.39506	1.0592	0.92214	1.14863	1	SVTAEEAKKFLAPKD	200719_HepG2_LPS_Kac_15cm_ExSen_2hr_ooo	3730
A0A0U1RQF0	3-hydroxyacyl-[acyl-carrier-protein] dehydratase	FASN	1	119.17	1	K	_GLK(ac)PSCTIIPLM(ox)K_	776	3	A0A0U1RQF0_776	2	0.24434	1.1707	1.0197	1.14808	6	AVLKRGLKPSCTIIP	20190709_HepG2_LPS_SILAC_KacIP_CID_120min_AS_2nd	20797
A0A0U1RQF0	3-hydroxyacyl-[acyl-carrier-protein] dehydratase	FASN	1	77.509	1	K	_CPPGVVPACHNSK(ac)DTVTISGPQAPVFEFVEQLRK_	646	13	A0A0U1RQF0_646	4	-0.36579	1.1706	1.0197	1.14798	2	VPACHNSKDTVTISG	20190709_HepG2_LPS_SILAC_KacIP_CID_120min_AS_1st	29484
A0A0U1RQF0	3-hydroxyacyl-[acyl-carrier-protein] dehydratase	FASN	1	260.58	1	K	_LYTLQDK(ac)AQVADVVVSR_	1072	7	A0A0U1RQF0_1072	3	-0.36603	1.1668	1.0197	1.14426	25	KLYTLQDKAQVADVV	20190617_HepG2_LPS_SILAC_KacIP_CID_120min_AS_1st	27686
Q86V81	THO complex subunit 4	ALYREF	1	72.801	1	K	_NSK(ac)QQLSAEELDAQLDAYNAR_	235	3	Q86V81_235	3	-0.63466	1.1076	0.968415	1.14372	3	RGAGRNSKQQLSAEE	200719_HepG2_LPS_Kac_15cm_ExSen_2hr_ooo	14029
E7ETK0	40S ribosomal protein S24	RPS24	1	111.61	1	K	_ATVPK(ac)TEIR_	37	5	E7ETK0_37	2	0.64755	1.5367	1.3447	1.14278	1	PGKATVPKTEIREKL	200719_HepG2_LPS_Kac_15cm_ExSen_2hr_ooo	5143
O60701	UDP-glucose 6-dehydrogenase	UGDH	1	87.181	1	K	_TYGM(ox)GK(ac)GR_	100	6	O60701_100	2	0.45854	1.1595	1.01913	1.13774	1	TKTYGMGKGRAADLK	200719_HepG2_LPS_Kac_15cm_ExSen_2hr_ooo	2293
Q8WVC2	40S ribosomal protein S21	RPS21	1	96.143	1	K	_DHASIQM(ox)NVAEVDK(ac)VTGR_	41	14	Q8WVC2_41	3	-0.26402	1.0704	0.943225	1.13483	1	MNVAEVDKVTGRFNG	200719_HepG2_LPS_Kac_15cm_ExSen_2hr_ooo	9820
Q9Y617	Phosphoserine aminotransferase	PSAT1	1	112.41	1	K	_GDDALEK(ac)R_	318	7	Q9Y617_318	2	0.29262	1.3869	1.2222	1.13476	1	KGDDALEKRFLDKAL	200719_HepG2_LPS_Kac_15cm_ExSen_2hr_ooo	3532
P07900	Heat shock protein HSP 90-alpha	HSP90AA1	1	81.625	1	K	_DNSTM(ox)GYM(ox)AAK(ac)K_	631	11	P07900_631	2	-0.30524	1.2005	1.0581	1.13458	1	TMGYMAAKKHLEINP	200719_HepG2_LPS_Kac_15cm_ExSen_2hr_ooo	3355
Q08426	Peroxisomal bifunctional enzyme	EHHADH	1	121.09	1	K	_DIK(ac)EGLQK_	33	3	Q08426_33	2	0.21427	0.99222	0.8746	1.13448	1	TTLLRDIKEGLQKAV	200719_HepG2_LPS_Kac_15cm_ExSen_2hr_ooo	5520
P16949	Stathmin	STMN1	1	161.93	1	K	_EAQM(ox)AAK(ac)LER_	119	7	P16949_119	2	0.75028	1.0219	0.90088	1.13434	5	REAQMAAKLERLREK	20200603_LPS_SILAC_Kac_IP_Combine_120min	2466
B1AHC9	ATP-dependent DNA helicase 2 subunit 1	XRCC6	1	186.76	1	K	_IM(ox)ATPEQVGK(ac)M(ox)K_	411	10	B1AHC9_411	2	2.264	1.059	0.93386	1.134	16	ATPEQVGKMKAIVEK	20200603_LPS_SILAC_Kac_IP_Combine_120min	1808
P51649	Succinate-semialdehyde dehydrogenase, mitochondrial	ALDH5A1	1	181.26	1	K	_WYNLM(ox)IQNK(ac)DDLAR_	135	9	P51649_135	2	1.0893	1.0696	0.9437	1.13341	4	YNLMIQNKDDLARII	20200603_LPS_SILAC_Kac_IP_Combine_120min	7287
P49321	Nuclear autoantigenic sperm protein	NASP	1	103.71	1	K	_AK(ac)LVPSQEETK_	417	2	P49321_417	2	-0.03844	0.95106	0.83916	1.13335	5	LEEKVRAKLVPSQEE	20190709_HepG2_LPS_SILAC_KacIP_CID_120min_AS_2nd	16352
E9PSF3	Bromodomain and PHD finger-containing protein 3	BRPF3	1	148.19	1	K	_ESCSK(ac)HASGTSFHLPQPSFR_	105	5	E9PSF3_105	4	0.25073	1.144	1.0103	1.13234	13	KKKESCSKHASGTSF	20190613_HepG2_LPS_SILAC_KacIP_CID_120min_AS_1st-1	12685
Q92793	CREB-binding protein	CREBBP	1	155.53	1;2	K	_SHAHK(ac)M(ox)VK(ac)WGLGLDDEGSSQGEPQSK_	1744	8	Q92793_1744	4	-0.051464	1.0685	0.94392	1.13198	7	SHAHKMVKWGLGLDD	20190709_HepG2_LPS_SILAC_KacIP_CID_120min_AS_3rd	20279
P11413	Glucose-6-phosphate 1-dehydrogenase	G6PD	1	91.867	1	K	_IIVEK(ac)PFGR_	171	5	P11413_171	2	0.67769	1.1823	1.0466	1.12966	2	WNRIIVEKPFGRDLQ	20190709_HepG2_LPS_SILAC_KacIP_CID_120min_AS_3rd	14725
P83731	60S ribosomal protein L24	RPL24	1	265.53	1	K	_TDGK(ac)VFQFLNAK_	27	4	P83731_27	2	0.425	1.1567	1.0243	1.12926	11	RYARTDGKVFQFLNA	20190709_HepG2_LPS_SILAC_KacIP_CID_120min_AS_2nd	20763
E7ENZ3	T-complex protein 1 subunit epsilon	CCT5	1	68.972	1	K	_HK(ac)LDVTSVEDYK_	210	2	E7ENZ3_210	2	0.71606	1.1411	1.0136	1.12579	2	PKPKTKHKLDVTSVE	20200603_LPS_SILAC_Kac_IP_Combine_120min	3708
P22307	Non-specific lipid-transfer protein	SCP2	1	95.307	1	K	_ITGNMGLAMK(ac)LQNLQLQPGNAK_	534	10	P22307_534	3	0.070495	1.0901	0.968475	1.12558	2	GNMGLAMKLQNLQLQ	20190709_HepG2_LPS_SILAC_KacIP_CID_120min_AS_1st	31084
Q96L91	E1A-binding protein p400	EP400	1	113.69	1	K	_TPTK(ac)PPCQ_	3155	4	Q96L91_3155	2	-0.82032	0.95033	0.84511	1.1245	5	VRLKTPTKPPCQ	200719_HepG2_LPS_Kac_15cm_ExSen_2hr_ooo	3816
A6NLN1	Polypyrimidine tract-binding protein 1	PTBP1	1	103.97	1	K	_ITLSK(ac)HQNVQLPR_	406	5	A6NLN1_406	3	0.14089	1.048	0.93248	1.12388	5	PIRITLSKHQNVQLP	20190709_HepG2_LPS_SILAC_KacIP_CID_120min_AS_2nd	11279
Q7KZF4	Staphylococcal nuclease domain-containing protein 1	SND1	1	55.536	1	K	_HFVDSHHQK(ac)PVNAIIEHVR_	193	9	Q7KZF4_193	4	-0.74809	1.0618	0.94573	1.12273	1	FVDSHHQKPVNAIIE	20190709_HepG2_LPS_SILAC_KacIP_CID_120min_AS_1st	11309
O76021	Ribosomal L1 domain-containing protein 1	RSL1D1	1	62.466	1	K	_FFTTPSK(ac)SVR_	468	7	O76021_468	2	-0.26255	1.1926	1.0629	1.12202	1	KFFTTPSKSVRKASH	200719_HepG2_LPS_Kac_15cm_ExSen_2hr_ooo	8324
A0A087WV57	Protein kinase C-binding protein 1	ZMYND8	1	110.84	1	K	_ILM(ox)SK(ac)PVLSGGTGR_	388	5	A0A087WV57_388	2	-0.45247	1.1066	0.98726	1.12088	6	SPKILMSKPVLSGGT	20190709_HepG2_LPS_SILAC_KacIP_CID_120min_AS_1st	16277
Q99879	Histone H2B type 1-M	H2BC14	1	75.696		K	_AINK(ac)AQK(ac)K_	24	7	Q99879_24	2	-0.86244	1.3985	1.2477	1.12086	1	KAINKAQKKDGKKRK	200719_HepG2_LPS_Kac_15cm_ExSen_2hr_ooo	2614
P42766	60S ribosomal protein L35	RPL35	1	123.95	1	K	_VTGGAASK(ac)LSK_	43	8	P42766_43	2	2.5074	1.0905	0.974365	1.11919	3	VTGGAASKLSKIRVV	200719_HepG2_LPS_Kac_15cm_ExSen_2hr_ooo	3652
F2Z2W6	Non-histone chromosomal protein HMG-14	HMGN1	1	127.3	1	K	_VSSAEGAAK(ac)EEPK_	14	9	F2Z2W6_14	2	0.17266	0.92411	0.82694	1.11751	2	SSAEGAAKEEPKRRS	200719_HepG2_LPS_Kac_15cm_ExSen_2hr_ooo	3230
P22626	Heterogeneous nuclear ribonucleoproteins A2/B1	HNRNPA2B1	1	130.87	1	K	_GFGFVTFDDHDPVDK(ac)IVLQK_	168	15	P22626_168	3	0.040762	1.0353	0.92694	1.1169	10	DDHDPVDKIVLQKYH	20200603_LPS_SILAC_Kac_IP_Combine_120min	10334
Q00610	Clathrin heavy chain 1	CLTC	1	71.03	1	K	_TGQIK(ac)EVER_	742	5	Q00610_742	2	0.64856	1.1962	1.0711	1.1168	1	ACKTGQIKEVERICR	200719_HepG2_LPS_Kac_15cm_ExSen_2hr_ooo	3819
P60709	Actin, cytoplasmic 1	ACTB	1	176.18	1	K	_DSYVGDEAQSK(ac)R_	61	11	P60709_61	2	0.36602	1.0618	0.951655	1.11574	10	VGDEAQSKRGILTLK	20190709_HepG2_LPS_SILAC_KacIP_CID_120min_AS_1st	6446
P40925	Malate dehydrogenase, cytoplasmic	MDH1	1	50.467	1	K	_SQGAALDK(ac)YAK_	118	8	P40925_118	2	-0.1996	1.0795	0.967535	1.11572	1	SQGAALDKYAKKSVK	200719_HepG2_LPS_Kac_15cm_ExSen_2hr_ooo	5412
P18859	ATP synthase-coupling factor 6, mitochondrial	ATP5PF	1	70.167	1	K	_LK(ac)QMFGNADMNTFPTFK_	79	2	P18859_79	3	0.88454	1.0077	0.90387	1.11487	1	ERELFKLKQMFGNAD	20190709_HepG2_LPS_SILAC_KacIP_CID_120min_AS_1st	26975
D6REM6	Matrin-3	MATR3	1	68.224	1	K	_EPSDK(ac)AVK_	698	5	D6REM6_698	2	0.28617	1.0325	0.92708	1.11371	1	GKKEPSDKAVKKDGS	200719_HepG2_LPS_Kac_15cm_ExSen_2hr_ooo	2380
P14174	Macrophage migration inhibitory factor	MIF	1	168.67	1	K	_SYSK(ac)LLCGLLAER_	78	4	P14174_78	2	0.035153	0.94165	0.845545	1.11366	10	AQNRSYSKLLCGLLA	20200603_LPS_SILAC_Kac_IP_Combine_120min	9117
P39023	60S ribosomal protein L3	RPL3	1	156.29	1	K	_LIK(ac)NNASTDYDLSDK_	300	3	P39023_300	2	0.52335	1.158	1.0408	1.11261	1	IKDGKLIKNNASTDY	200719_HepG2_LPS_Kac_15cm_ExSen_2hr_ooo	8360
B5MCP9	40S ribosomal protein S7	RPS7	1	80.438	1	K	_LIK(ac)VHLDK_	155	3	B5MCP9_155	3	0.90491	1.0872	0.97781	1.11187	2	LDGSRLIKVHLDKAQ	20190613_HepG2_LPS_SILAC_KacIP_CID_120min_AS_1st-1	6463
P60866	40S ribosomal protein S20	RPS20	1	91.9	1;2	K	_AFK(ac)DTGK(ac)TPVEPEVAIHR_	4	3	P60866_4	3	-0.27941	1.0873	0.97803	1.11172	1	MAFKDTGKTPV	200719_HepG2_LPS_Kac_15cm_ExSen_2hr_ooo	10853
E5RGN3	Copper transport protein ATOX1	ATOX1	0.951081	82.069	1	K	_K(ac)TGKTVSYLGLE_	48	1	E5RGN3_48	2	-0.34035	1.0107	0.9104	1.11017	2	TLLATLKKTGKTVSY	20200603_LPS_SILAC_Kac_IP_Combine_120min	4696
O00330	Pyruvate dehydrogenase protein X component, mitochondrial	PDHX	1	86.772	1	K	_SFK(ac)ANLENPIR_	491	3	O00330_491	2	-0.26298	1.1242	1.01316	1.10959	3	TRFLKSFKANLENPI	20190709_HepG2_LPS_SILAC_KacIP_CID_120min_AS_2nd	14600
P00367	Glutamate dehydrogenase 1, mitochondrial	GLUD1	1	108.66	1	K	_IIK(ac)PCNHVLSLSFPIRR_	110	3	P00367_110	4	0.34894	1.0593	0.95784	1.10593	10	RGILRIIKPCNHVLS	20200603_LPS_SILAC_Kac_IP_Combine_120min	8030
A0A087X0X3	Heterogeneous nuclear ribonucleoprotein M	HNRNPM	1	157.58	1	K	_GCGVVK(ac)FESPEVAER_	698	6	A0A087X0X3_698	2	0.52205	1.0796	0.9779	1.104	9	SKGCGVVKFESPEVA	20200603_LPS_SILAC_Kac_IP_Combine_120min	4833
P49207	60S ribosomal protein L34	RPL34	1	96.009	1	K	_VLK(ac)AQAQSQK_	108	3	P49207_108	2	0.74891	1.2723	1.15345	1.10304	1	KIVVKVLKAQAQSQK	200719_HepG2_LPS_Kac_15cm_ExSen_2hr_ooo	2551
P49207	60S ribosomal protein L34	RPL34	1	99.5	1	K	_LSYNTASNK(ac)TR_	19	9	P49207_19	2	0.085294	1.2715	1.15345	1.10235	1	SYNTASNKTRLSRTP	200719_HepG2_LPS_Kac_15cm_ExSen_2hr_ooo	4390
P19338	Nucleolin	NCL	1	147.28	1	K	_IVTDRETGSSK(ac)GFGFVDFNSEEDAK_	610	11	P19338_610	3	0.12194	1.1217	1.01775	1.10214	3	DRETGSSKGFGFVDF	20190709_HepG2_LPS_SILAC_KacIP_CID_120min_AS_2nd	19519
P14618	Pyruvate kinase PKM	PKM	1	77.506	1	K	_LNFSHGTHEYHAETIK(ac)NVR_	89	16	P14618_89	4	0.32333	0.98452	0.893515	1.10185	2	EYHAETIKNVRTATE	20190709_HepG2_LPS_SILAC_KacIP_CID_120min_AS_2nd	9156
P00441	Superoxide dismutase [Cu-Zn]	SOD1	1	46.968	1	K	_HVGDLGNVTADK(ac)DGVADVSIEDSVISLSGDHCIIGR_	92	12	P00441_92	4	-0.042327	1.0056	0.9128	1.10167	2	LGNVTADKDGVADVS	20190709_HepG2_LPS_SILAC_KacIP_CID_120min_AS_3rd	29827
P40925	Malate dehydrogenase, cytoplasmic	MDH1	1	132.32	1	K	_IFK(ac)SQGAALDK_	110	3	P40925_110	2	0.32082	1.0643	0.967535	1.10001	1	KANVKIFKSQGAALD	200719_HepG2_LPS_Kac_15cm_ExSen_2hr_ooo	6387
P04040	Catalase	CAT	1	62.438	1	K	_GAGAFGYFEVTHDITK(ac)YSK_	93	16	P04040_93	3	0.42834	1.053	0.95861	1.09847	9	EVTHDITKYSKAKVF	20190709_HepG2_LPS_SILAC_KacIP_CID_120min_AS_2nd	22653
P41250	Glycine--tRNA ligase	GARS1	1	54.343	1	K	_VLEAK(ac)ELALQPK_	108	5	P41250_108	2	-0.11319	1.0547	0.96092	1.09759	1	RKRVLEAKELALQPK	200719_HepG2_LPS_Kac_15cm_ExSen_2hr_ooo	11335
Q9Y2W2	WW domain-binding protein 11	WBP11	1	82.069	1	K	_SGK(ac)FM(ox)NPTDQAR_	13	3	Q9Y2W2_13	2	-0.72832	0.9344	0.85184	1.09692	1	TSSTKSGKFMNPTDQ	200719_HepG2_LPS_Kac_15cm_ExSen_2hr_ooo	5338
P62805	Histone H4	H4C1	1	126.19	1	K	_DAVTYTEHAK(ac)R_	78	10	P62805_78	2	-1.522	1.3686	1.25045	1.09449	6	VTYTEHAKRKTVTAM	200719_HepG2_LPS_Kac_15cm_ExSen_2hr_ooo	4125
P22307	Non-specific lipid-transfer protein	SCP2	1	102.4	1	K	_K(ac)LEEEGEQFVK_	443	1	P22307_443	2	0.054463	1.0599	0.968475	1.0944	1	VFKEIEKKLEEEGEQ	200719_HepG2_LPS_Kac_15cm_ExSen_2hr_ooo	8162
Q9P0Z9	Peroxisomal sarcosine oxidase	PIPOX	1	107.06	1	K	_K(ac)AYLEDFYTR_	57	1	Q9P0Z9_57	2	0.49754	0.92911	0.84944	1.09379	3	GQSRIIRKAYLEDFY	200719_HepG2_LPS_Kac_15cm_ExSen_2hr_ooo	11896
F8W6I7	Helix-destabilizing protein	HNRNPA1	1	110.12	1;2	K	_SK(ac)SESPK(ac)EPEQLR_	3	2	F8W6I7_3	2	-0.24831	1.4993	1.3714	1.09326	1	MSKSESPKEP	20200603_LPS_SILAC_Kac_IP_Combine_120min	2248
A0A0U1RQF0	3-hydroxyacyl-[acyl-carrier-protein] dehydratase	FASN	1	284.51	1	K	_TPEAVQK(ac)LLEQGLR_	436	7	A0A0U1RQF0_436	3	0.183	1.1131	1.0197	1.0916	17	RTPEAVQKLLEQGLR	20200603_LPS_SILAC_Kac_IP_Combine_120min	8674
Q9P0Z9	Peroxisomal sarcosine oxidase	PIPOX	1	43.69	1	K	_VEHQCLSSEELK(ac)QR_	126	12	Q9P0Z9_126	3	0.40928	0.92656	0.84944	1.09079	1	CLSSEELKQRFPNIR	200719_HepG2_LPS_Kac_15cm_ExSen_2hr_ooo	5345
O15355	Protein phosphatase 1G	PPM1G	1	103.97	1	K	_NTAELQPESGK(ac)R_	519	11	O15355_519	2	0.56015	0.94585	0.867225	1.09066	1	ELQPESGKRKLEEVL	200719_HepG2_LPS_Kac_15cm_ExSen_2hr_ooo	3988
P13984	General transcription factor IIF subunit 2	GTF2F2	1	49.188	1	K	_VVTTNYK(ac)PVANHQYNIEYER_	154	7	P13984_154	3	1.5359	0.95669	0.877585	1.09014	1	KVVTTNYKPVANHQY	200719_HepG2_LPS_Kac_15cm_ExSen_2hr_ooo	9633
O00148	ATP-dependent RNA helicase DDX39A	DDX39A	1	58.079	1	K	_DIK(ac)GSYVSIHSSGFR_	35	3	O00148_35	3	0.45029	1.077	0.98952	1.08841	2	APPKKDIKGSYVSIH	20200603_LPS_SILAC_Kac_IP_Combine_120min	4948
P12270	Nucleoprotein TPR	TPR	1	99.568	1	K	_K(ac)LENEVEQR_	854	1	P12270_854	2	1.0363	1.0388	0.95497	1.08778	1	EISHLKKKLENEVEQ	200719_HepG2_LPS_Kac_15cm_ExSen_2hr_ooo	4202
E9PF16	Medium-chain acyl-CoA ligase ACSF2, mitochondrial	ACSF2	1	114.24	1	K	_QFK(ac)TQQYYNVLK_	139	3	E9PF16_139	2	1.7849	0.83606	0.76927	1.08682	2	LVFPKQFKTQQYYNV	200719_HepG2_LPS_Kac_15cm_ExSen_2hr_ooo	11328
B4DLR8	NAD	NQO1	1	59.198	1	K	_SIPTDNQIK(ac)AR_	199	9	B4DLR8_199	2	0.1087	1.2619	1.16395	1.08415	1	IPTDNQIKARK	200719_HepG2_LPS_Kac_15cm_ExSen_2hr_ooo	5801
A6NLN1	Polypyrimidine tract-binding protein 1	PTBP1	1	80.632	1	K	_(ac)SSNSASAANGNDSK(ac)K_	15	14	A6NLN1_15	2	0.39342	1.0094	0.93248	1.08249	1	AANGNDSKKFKGDSR	200719_HepG2_LPS_Kac_15cm_ExSen_2hr_ooo	2567
P05387	60S acidic ribosomal protein P2	RPLP2	1	219.96	1	K	_YVASYLLAALGGNSSPSAK(ac)DIK_	21	19	P05387_21	3	-0.2863	0.96386	0.890845	1.08196	17	GNSSPSAKDIKKILD	20190613_HepG2_LPS_SILAC_KacIP_CID_120min_AS_2nd-1	27621
P62906	60S ribosomal protein L10a	RPL10A	0.999919	64.537	1	K	_KYDAFLASESLIK(ac)QIPR_	118	13	P62906_118	3	-0.49699	1.0978	1.01535	1.0812	1	LASESLIKQIPRILG	20190709_HepG2_LPS_SILAC_KacIP_CID_120min_AS_1st	27163
Q9Y3I0	RNA-splicing ligase RtcB homolog	RTCB	1	83.499	1	K	_AIK(ac)LRPIAVIK_	496	3	Q9Y3I0_496	3	0.4451	1.0879	1.00638	1.08101	2	GISKKAIKLRPIAVI	20190617_HepG2_LPS_SILAC_KacIP_CID_120min_AS_1st	15057
P04075	Fructose-bisphosphate aldolase A	ALDOA	1	239.75	1	K	_GILAADESTGSIAK(ac)R_	42	14	P04075_42	3	-0.51028	0.98405	0.911145	1.08001	15	ESTGSIAKRLQSIGT	20200603_LPS_SILAC_Kac_IP_Combine_120min	4087
P08263	Glutathione S-transferase A1	GSTA1	1	65.956	1	K	_VLK(ac)SHGQDYLVGNK_	141	3	P08263_141	3	0.61996	0.69455	0.64418	1.07819	2	PAFEKVLKSHGQDYL	20190617_HepG2_LPS_SILAC_KacIP_CID_120min_AS_2nd	7658
Q29RF7	Sister chromatid cohesion protein PDS5 homolog A	PDS5A	1	72.582	1	K	_NDDLNK(ac)PINK_	1290	6	Q29RF7_1290	2	-3.2797	0.9691	0.89948	1.0774	1	TKNDDLNKPINKGRK	200719_HepG2_LPS_Kac_15cm_ExSen_2hr_ooo	5002
P22307	Non-specific lipid-transfer protein	SCP2	1	101.38	1	K	_EATWVVDVK(ac)NGK_	479	9	P22307_479	2	-1.1685	1.0409	0.968475	1.07478	3	ATWVVDVKNGKGSVL	20190709_HepG2_LPS_SILAC_KacIP_CID_120min_AS_3rd	15716
Q96KR1	Zinc finger RNA-binding protein	ZFR	1	249.36	1	K	_INFVGGNK(ac)LQSTGNK_	509	8	Q96KR1_509	2	0.34817	1.0502	0.97718	1.07473	10	INFVGGNKLQSTGNK	20190617_HepG2_LPS_SILAC_KacIP_CID_120min_AS_1st	14108
P19338	Nucleolin	NCL	1	103.55	1	K	_VAVATPAK(ac)K_	79	8	P19338_79	2	0.92396	1.0937	1.01775	1.07463	2	VAVATPAKKAAVTPG	200719_HepG2_LPS_Kac_15cm_ExSen_2hr_ooo	3600
P68104	Elongation factor 1-alpha 1	EEF1A1	1	112.17	1	K	_YEEIVK(ac)EVSTYIK_	172	6	P68104_172	2	-0.34837	1.179	1.0973	1.07446	4	KRYEEIVKEVSTYIK	20200603_LPS_SILAC_Kac_IP_Combine_120min	8513
P51659	Peroxisomal multifunctional enzyme type 2	HSD17B4	1	264.09	1	K	_GSLAADK(ac)VVEEIRR_	57	7	P51659_57	3	0.74423	0.92904	0.86474	1.07436	14	KGSLAADKVVEEIRR	20190709_HepG2_LPS_SILAC_KacIP_CID_120min_AS_1st	18505
Q92793	CREB-binding protein	CREBBP	1	197.4	1	K	_KYEFSPQTLCCYGK(ac)QLCTIPR_	1216	14	Q92793_1216	3	-0.79925	1.014	0.94392	1.07424	11	QTLCCYGKQLCTIPR	20200603_LPS_SILAC_Kac_IP_Combine_120min	8262
Q71DI3	Histone H3.2	H3C15	1	141.08	1;2	K	_K(ac)STGGK(ac)APR_	10	1	Q71DI3_10	3	-0.78412	1.6088	1.5014	1.07153	1	RTKQTARKSTGGKAP	20200603_LPS_SILAC_Kac_IP_Combine_120min	463
P06733	Alpha-enolase	ENO1	1	141.48	1	K	_LAK(ac)YNQLLR_	406	3	P06733_406	2	0.057311	0.93965	0.8785	1.06961	9	CRSERLAKYNQLLRI	20200603_LPS_SILAC_Kac_IP_Combine_120min	4191
P54886	Delta-1-pyrroline-5-carboxylate synthase	ALDH18A1	1	97.813	1	K	_K(ac)DLEEAEGR_	409	1	P54886_409	2	-0.52258	1.0819	1.0119	1.06918	1	EILLANKKDLEEAEG	200719_HepG2_LPS_Kac_15cm_ExSen_2hr_ooo	10988
P55884	Eukaryotic translation initiation factor 3 subunit B	EIF3B	1	89.296	1	K	_IFEQK(ac)DR_	734	5	P55884_734	2	-0.20748	1.2177	1.13985	1.0683	1	YSKIFEQKDRLSQSK	200719_HepG2_LPS_Kac_15cm_ExSen_2hr_ooo	4241
Q5STU3	RNA helicase	DDX39B	1	99.344	1	K	_DVK(ac)GSYVSIHSSGFR_	36	3	Q5STU3_36	3	0.4756	1.271	1.1901	1.06798	12	APAKKDVKGSYVSIH	200719_HepG2_LPS_Kac_15cm_ExSen_2hr_ooo	9311
P40939	Trifunctional enzyme subunit alpha, mitochondrial	HADHA	1	130.73	1	K	_HLAILGAGLMGAGIAQVSVDK(ac)GLK_	383	21	P40939_383	3	-0.22442	1.044	0.977645	1.06787	2	IAQVSVDKGLKTILK	20190709_HepG2_LPS_SILAC_KacIP_CID_120min_AS_2nd	28052
P04040	Catalase	CAT	1	61.423	1	K	_VWPHK(ac)DYPLIPVGK_	306	5	P04040_306	3	-0.9575	1.0234	0.95861	1.06759	1	LTKVWPHKDYPLIPV	20190613_HepG2_LPS_SILAC_KacIP_CID_120min_AS_1st-1	18693
P49773	Histidine triad nucleotide-binding protein 1	HINT1	1	113.76	1	K	_EIPAK(ac)IIFEDDR_	30	5	P49773_30	2	0.62491	1.0043	0.94141	1.0668	8	IRKEIPAKIIFEDDR	20200603_LPS_SILAC_Kac_IP_Combine_120min	7787
A0A1X7SBS1	Heterogeneous nuclear ribonucleoprotein U	HNRNPU	1	173.06	1	K	_HLYTK(ac)DIDIHEVR_	271	5	A0A1X7SBS1_271	3	-2.5899	1.0695	1.003	1.0663	12	PVRHLYTKDIDIHEV	20190613_HepG2_LPS_SILAC_KacIP_CID_120min_AS_1st-2	9733
P13667	Protein disulfide-isomerase A4	PDIA4	1	77.062	1	K	_FIEEHATK(ac)LSR_	637	8	P13667_637	3	-0.92641	1.0273	0.963735	1.06596	4	FIEEHATKLSRTKEE	200719_HepG2_LPS_Kac_15cm_ExSen_2hr_ooo	5897
A0A096LNH5	Glutamine amidotransferase-like class 1 domain-containing protein 3B, mitochondrial	GATD3B	1	93.374	1	K	_VNK(ac)EVER_	71	3	A0A096LNH5_71	2	1.0577	0.79902	0.75044	1.06474	1	GKDCKVNKEVERVLK	200719_HepG2_LPS_Kac_15cm_ExSen_2hr_ooo	2627
P24534	Elongation factor 1-beta	EEF1B2	1	102.62	1	K	_LVPVGYGIK(ac)K_	185	9	P24534_185	2	-0.36363	1.0476	0.98702	1.06138	6	VPVGYGIKKLQIQCV	20190613_HepG2_LPS_SILAC_KacIP_CID_120min_AS_2nd-2	10489
Q06830	Peroxiredoxin-1	PRDX1	1	75.73	1	K	_K(ac)LNCQVIGASVDSHFCHLAWVNTPK_	68	1	Q06830_68	4	-0.99186	0.99411	0.93677	1.06121	5	DRAEEFKKLNCQVIG	20190613_HepG2_LPS_SILAC_KacIP_CID_120min_AS_1st-1	22217
B1AHC9	ATP-dependent DNA helicase 2 subunit 1	XRCC6	0.999999	82.651	1	K	_KQELLEALTK(ac)HFQD_	555	10	B1AHC9_555	3	-0.12928	0.98871	0.93386	1.05873	4	ELLEALTKHFQD	20200603_LPS_SILAC_Kac_IP_Combine_120min	7535
Q32Q12	Nucleoside diphosphate kinase	NME1-NME2	1	65.295	1	K	_TFIAIK(ac)PDGVQR_	37	6	Q32Q12_37	2	-0.71036	1.2376	1.16895	1.05873	1	ERTFIAIKPDGVQRG	200719_HepG2_LPS_Kac_15cm_ExSen_2hr_ooo	11104
A0A0U1RQF0	3-hydroxyacyl-[acyl-carrier-protein] dehydratase	FASN	1	97.823	1	K	_VLEALLPLK(ac)GLEER_	2389	9	A0A0U1RQF0_2389	2	0.34629	1.0792	1.0197	1.05835	10	LEALLPLKGLEERVA	200719_HepG2_LPS_Kac_15cm_ExSen_2hr_ooo	18458
Q15459	Splicing factor 3A subunit 1	SF3A1	1	162.37	1	K	_TDIFGVEETAIGK(ac)K_	486	13	Q15459_486	2	-0.55884	0.94408	0.89204	1.05834	4	VEETAIGKKIGEEEI	20200603_LPS_SILAC_Kac_IP_Combine_120min	7394
Q14978	Nucleolar and coiled-body phosphoprotein 1	NOLC1	1	125.03	1	K	_ITPVTVK(ac)AQTK_	193	7	Q14978_193	2	-0.90796	1.0337	0.97724	1.05777	2	KITPVTVKAQTKAPP	200719_HepG2_LPS_Kac_15cm_ExSen_2hr_ooo	5905
Q04828	Aldo-keto reductase family 1 member C1	AKR1C1	1	130.72	1	K	_ALEATK(ac)LAIEAGFR_	39	6	Q04828_39	2	0.10912	1.0447	0.988095	1.05729	4	SKALEATKLAIEAGF	20190617_HepG2_LPS_SILAC_KacIP_CID_120min_AS_1st	26752
Q06203	Amidophosphoribosyltransferase	PPAT	1	140.33	1	K	_K(ac)LYVSNLGIGHTR_	81	1	Q06203_81	3	0.19183	1.1488	1.08683	1.05701	10	FTEDNLKKLYVSNLG	200719_HepG2_LPS_Kac_15cm_ExSen_2hr_ooo	8750
P62937	Peptidyl-prolyl cis-trans isomerase A	PPIA	1	123.76	1	K	_VPK(ac)TAENFR_	31	3	P62937_31	2	-1.2356	0.9621	0.911095	1.05598	4	LFADKVPKTAENFRA	20190709_HepG2_LPS_SILAC_KacIP_CID_120min_AS_1st	25099
Q96AG4	Leucine-rich repeat-containing protein 59	LRRC59	1	108.56	1	K	_VAGDCLDEK(ac)QCK_	135	9	Q96AG4_135	2	0.1341	1.0829	1.02585	1.05561	1	AGDCLDEKQCKQCAN	200719_HepG2_LPS_Kac_15cm_ExSen_2hr_ooo	4605
Q99879	Histone H2B type 1-M	H2BC14	1	180.87	1;2	K	_K(ac)AINK(ac)AQK_	21	5	Q99879_21	2	0.39135	1.3162	1.2477	1.0549	1	GSKKAINKAQKKDGK	20200603_LPS_SILAC_Kac_IP_Combine_120min	846
P13010	X-ray repair cross-complementing protein 5	XRCC5	1	142.85	1	K	_DQVTAQEIFQDNHEDGPTAK(ac)K_	565	20	P13010_565	3	0.38836	0.97133	0.92214	1.05334	4	HEDGPTAKKLKTEQG	20200603_LPS_SILAC_Kac_IP_Combine_120min	4886
Q96C86	m7GpppX diphosphatase	DCPS	1	88.495	1	K	_(ac)ADAAPQLGK(ac)R_	10	9	Q96C86_10	2	-0.73055	0.95761	0.909555	1.05283	1	DAAPQLGKRKRELDV	200719_HepG2_LPS_Kac_15cm_ExSen_2hr_ooo	8116
K4DI93	Cullin 4B, isoform CRA_e	CUL4B	1	58.246	1	K	_SATDGNTSTTPPTSAK(ac)K_	42	16	K4DI93_42	2	0.56958	1.1221	1.0661	1.05253	1	TTPPTSAKKRKLNSS	200719_HepG2_LPS_Kac_15cm_ExSen_2hr_ooo	3248
P62906	60S ribosomal protein L10a	RPL10A	1	152.07	1	K	_K(ac)YDAFLASESLIK_	106	1	P62906_106	2	-1.7836	1.0681	1.01535	1.05195	5	LVKKLAKKYDAFLAS	20190709_HepG2_LPS_SILAC_KacIP_CID_120min_AS_1st	24022
Q08426	Peroxisomal bifunctional enzyme	EHHADH	1	104.23	1	K	_LLEVIPSQYSSPTTIATVM(ox)NLSK(ac)K_	464	23	Q08426_464	3	-1.5326	0.91917	0.8746	1.05096	3	ATVMNLSKKIKKIGV	20190709_HepG2_LPS_SILAC_KacIP_CID_120min_AS_1st	32606
B4DLR8	NAD	NQO1	1	80.871	1	K	_K(ac)FGLSVGHHLGK_	179	1	B4DLR8_179	3	1.2437	1.2224	1.16395	1.05022	6	QDEEKNKKFGLSVGH	20190613_HepG2_LPS_SILAC_KacIP_CID_120min_AS_1st-1	7271
P60866	40S ribosomal protein S20	RPS20	1	77.505	2	K	_AFK(ac)DTGK(ac)TPVEPEVAIHR_	8	7	P60866_8	3	-0.27941	1.0269	0.97803	1.04997	4	MAFKDTGKTPV	200719_HepG2_LPS_Kac_15cm_ExSen_2hr_ooo	10853
P23246	Splicing factor, proline- and glutamine-rich	SFPQ	1	64.121	1	K	_GIVEFASK(ac)PAAR_	421	8	P23246_421	2	0.12422	1.0481	0.998615	1.04955	1	GIVEFASKPAARKAF	200719_HepG2_LPS_Kac_15cm_ExSen_2hr_ooo	9764
P14866	Heterogeneous nuclear ribonucleoprotein L	HNRNPL	1	84.365	1	K	_YYGGGSEGGRAPK(ac)R_	59	13	P14866_59	3	1.02	1.1253	1.0724	1.04933	3	SEGGRAPKRLKTDNA	200719_HepG2_LPS_Kac_15cm_ExSen_2hr_ooo	2624
Q8N3C0	Activating signal cointegrator 1 complex subunit 3	ASCC3	1	57.288	1	K	_ELTGDM(ox)QLSK(ac)SEILR_	572	10	Q8N3C0_572	2	-0.043392	1.202	1.146	1.04887	1	TGDMQLSKSEILRTQ	200719_HepG2_LPS_Kac_15cm_ExSen_2hr_ooo	12055
M0QZC5	40S ribosomal protein S11	RPS11	1	72.891	1	K	_VLLGETGK(ac)EK_	30	8	M0QZC5_30	2	1.5194	1.1644	1.1106	1.04844	3	VLLGETGKEKLPRYY	200719_HepG2_LPS_Kac_15cm_ExSen_2hr_ooo	7965
P30086	Phosphatidylethanolamine-binding protein 1	PEBP1	1	42.03	1	K	_GNDISSGTVLSDYVGSGPPK(ac)GTGLHR_	113	20	P30086_113	3	-0.85236	0.84668	0.80763	1.04835	1	YVGSGPPKGTGLHRY	20190709_HepG2_LPS_SILAC_KacIP_CID_120min_AS_1st	20737
A0A1X7SBS1	Heterogeneous nuclear ribonucleoprotein U	HNRNPU	1	93.561	1	K	_LSDK(ac)GLK_	28	4	A0A1X7SBS1_28	2	0.5771	1.0514	1.003	1.04826	3	KKRRLSDKGLKAELM	200719_HepG2_LPS_Kac_15cm_ExSen_2hr_ooo	3627
Q9BSH5	Haloacid dehalogenase-like hydrolase domain-containing protein 3	HDHD3	1	190.85	1	K	_LLTWDVK(ac)DTLLR_	15	7	Q9BSH5_15	2	-0.048589	0.9738	0.92991	1.0472	5	RLLTWDVKDTLLRLR	20190709_HepG2_LPS_SILAC_KacIP_CID_120min_AS_1st	30255
P45954	Short/branched chain specific acyl-CoA dehydrogenase, mitochondrial	ACADSB	1	55.575	1	K	_EASM(ox)AK(ac)YYASEIAGQTTSK_	371	6	P45954_371	3	-0.27525	1.0869	1.038	1.04711	1	IKEASMAKYYASEIA	200719_HepG2_LPS_Kac_15cm_ExSen_2hr_ooo	11389
P10809	60 kDa heat shock protein, mitochondrial	HSPD1	1	186.96	1	K	_TVIIEQSWGSPK(ac)VTK_	72	12	P10809_72	2	-0.29393	0.9992	0.954885	1.04641	3	EQSWGSPKVTKDGVT	20190709_HepG2_LPS_SILAC_KacIP_CID_120min_AS_2nd	15853
P50990	T-complex protein 1 subunit theta	CCT8	1	74.464	1	K	_LNSK(ac)WDLR_	318	4	P50990_318	2	-0.67003	1.1272	1.0778	1.04583	1	MLVRLNSKWDLRRLC	200719_HepG2_LPS_Kac_15cm_ExSen_2hr_ooo	9209
A0A3B3ITZ9	Thyroid hormone receptor-associated protein 3	THRAP3	1	53.034	1	K	_EESTTGFDK(ac)SR_	811	9	A0A3B3ITZ9_811	2	1.0768	1.0427	0.99705	1.04579	1	ESTTGFDKSRLGTKD	200719_HepG2_LPS_Kac_15cm_ExSen_2hr_ooo	4448
P42330	Aldo-keto reductase family 1 member C3	AKR1C3	1	72.434	1	K	_(ac)M(ox)DSK(ac)HQCVK_	4	4	P42330_4	2	-0.1673	0.97762	0.93533	1.04521	1	MDSKHQCVKLN	200719_HepG2_LPS_Kac_15cm_ExSen_2hr_ooo	2383
P40939	Trifunctional enzyme subunit alpha, mitochondrial	HADHA	1	161.93	1	K	_GFYIYQEGVK(ac)R_	644	10	P40939_644	2	-0.27526	1.0216	0.977645	1.04496	10	YIYQEGVKRKDLNSD	20200603_LPS_SILAC_Kac_IP_Combine_120min	4918
P40227	T-complex protein 1 subunit zeta	CCT6A	1	97.734	1	K	_FTFIEK(ac)CNNPR_	365	6	P40227_365	2	-0.3066	1.0748	1.03105	1.04243	3	EKFTFIEKCNNPRSV	200719_HepG2_LPS_Kac_15cm_ExSen_2hr_ooo	9931
O60488	Long-chain-fatty-acid--CoA ligase 4	ACSL4	1	74.726	1	K	_LK(ac)DWQEGGYTINDKPNPR_	500	2	O60488_500	3	-1.0817	1.1479	1.10278	1.04091	2	ICCEIKLKDWQEGGY	20190709_HepG2_LPS_SILAC_KacIP_CID_120min_AS_1st	14179
P0DMV9	Heat shock 70 kDa protein 1B	HSPA1B	1	159.34	1	K	_ITITNDK(ac)GR_	507	7	P0DMV9_507	2	0.93402	1.1957	1.1506	1.0392	5	KITITNDKGRLSKED	20190613_HepG2_LPS_SILAC_KacIP_CID_120min_AS_1st-2	4450
G3V5E4	Glucosamine 6-phosphate N-acetyltransferase	GNPNAT1	1	45.138	1	K	_LNCYK(ac)ITLECLPQNVGFYK_	81	5	G3V5E4_81	3	0.32876	1.027	0.98841	1.03904	3	SKKLNCYKITLECLP	20200603_LPS_SILAC_Kac_IP_Combine_120min	10161
P10809	60 kDa heat shock protein, mitochondrial	HSPD1	1	220.25	1	K	_CEFQDAYVLLSEK(ac)K_	249	13	P10809_249	2	-0.61543	0.99206	0.954885	1.03893	4	AYVLLSEKKISSIQS	20190613_HepG2_LPS_SILAC_KacIP_CID_120min_AS_1st-1	23693
P00338	L-lactate dehydrogenase A chain	LDHA	1	187.08	1	K	_IVSGK(ac)DYNVTANSK_	81	5	P00338_81	2	0.88744	1.052	1.01261	1.0389	2	TPKIVSGKDYNVTAN	20190709_HepG2_LPS_SILAC_KacIP_CID_120min_AS_1st	7978
P62937	Peptidyl-prolyl cis-trans isomerase A	PPIA	1	239.87	1	K	_SIYGEK(ac)FEDENFILK_	82	6	P62937_82	2	-0.20616	0.94444	0.911095	1.0366	14	GKSIYGEKFEDENFI	20190709_HepG2_LPS_SILAC_KacIP_CID_120min_AS_1st	26488
D6RAT0	40S ribosomal protein S3a	RPS3A	1	83.998	1	K	_DK(ac)M(ox)CSM(ox)VK_	72	2	D6RAT0_72	2	-0.697	1.1146	1.0776	1.03434	1	GMDLTRDKMCSMVKK	200719_HepG2_LPS_Kac_15cm_ExSen_2hr_ooo	2164
P27348	14-3-3 protein theta	YWHAQ	1	50.088	1	K	_NLLSVAYK(ac)NVVGGR_	49	8	P27348_49	2	-0.71743	1.196	1.15725	1.03348	1	NLLSVAYKNVVGGRR	200719_HepG2_LPS_Kac_15cm_ExSen_2hr_ooo	15964
E9PP50	Cofilin, non-muscle isoform	CFL1	1	107.09	1	K	_M(ox)IYASSK(ac)DAIK_	121	7	E9PP50_121	2	0.054298	1.044	1.0103	1.03336	2	KMIYASSKDAIKKKL	200719_HepG2_LPS_Kac_15cm_ExSen_2hr_ooo	6184
P07900	Heat shock protein HSP 90-alpha	HSP90AA1	0.999998	148.7	1	K	_YIDQEELNK(ac)TKPIWTR_	292	9	P07900_292	3	0.14342	1.0926	1.0581	1.03261	3	IDQEELNKTKPIWTR	200719_HepG2_LPS_Kac_15cm_ExSen_2hr_ooo	11910
P00441	Superoxide dismutase [Cu-Zn]	SOD1	1	151.07	1	K	_TLVVHEK(ac)ADDLGKGGNEESTK_	123	7	P00441_123	3	1.3058	0.94179	0.9128	1.03176	13	RTLVVHEKADDLGKG	20200603_LPS_SILAC_Kac_IP_Combine_120min	2400
Q9HD33	39S ribosomal protein L47, mitochondrial	MRPL47	1	221.78	1	K	_VVDSM(ox)DALDK(ac)VVQEREDALR_	144	10	Q9HD33_144	3	0.020451	0.98133	0.95126	1.03161	31	DSMDALDKVVQERED	20190617_HepG2_LPS_SILAC_KacIP_CID_120min_AS_2nd	23481
P42704	Leucine-rich PPR motif-containing protein, mitochondrial	LRPPRC	1	46.249	1	K	_LDSSAVLDTGK(ac)YVGLVR_	750	11	P42704_750	2	-0.022559	1.1139	1.0812	1.03024	1	SAVLDTGKYVGLVRV	200719_HepG2_LPS_Kac_15cm_ExSen_2hr_ooo	16364
P54886	Delta-1-pyrroline-5-carboxylate synthase	ALDH18A1	1	76.868	1	K	_VSGHVITDIVEGK(ac)K_	347	13	P54886_347	3	0.21572	1.0401	1.0119	1.02787	1	ITDIVEGKKVGTFFS	20200603_LPS_SILAC_Kac_IP_Combine_120min	4513
C9JXG8	Ran-specific GTPase-activating protein	RANBP1	1	88.596	1	K	_FLNAENAQK(ac)FK_	100	9	C9JXG8_100	2	0.72221	0.89793	0.87401	1.02737	1	LNAENAQKFKTKFEE	200719_HepG2_LPS_Kac_15cm_ExSen_2hr_ooo	8788
P23527	Histone H2B type 1-O	H2BC17	1	128.27	1	K	_AVTK(ac)YTSSK_	121	4	P23527_121	2	0.30539	1.3193	1.2863	1.02565	7	EGTKAVTKYTSSK	20190613_HepG2_LPS_SILAC_KacIP_CID_120min_AS_2nd-1	1792
P04075	Fructose-bisphosphate aldolase A	ALDOA	1	102.97	1	K	_VDK(ac)GVVPLAGTNGETTTQGLDGLSER_	111	3	P04075_111	3	-0.055471	0.93426	0.911145	1.02537	7	VVGIKVDKGVVPLAG	20190709_HepG2_LPS_SILAC_KacIP_CID_120min_AS_1st	22446
P31946	14-3-3 protein beta/alpha	YWHAB	1	219.84	1	K	_NLLSVAYK(ac)NVVGAR_	51	8	P31946_51	2	0.49945	1.2147	1.18525	1.02485	10	NLLSVAYKNVVGARR	20190709_HepG2_LPS_SILAC_KacIP_CID_120min_AS_1st	26357
P11182	Lipoamide acyltransferase component of branched-chain alpha-keto acid dehydrogenase complex, mitochondrial	DBT	1	54.412	1	K	_GEVYK(ac)AQIMNVSWSADHR_	440	5	P11182_440	3	-0.17534	0.98114	0.95737	1.02483	1	NQKGEVYKAQIMNVS	20190613_HepG2_LPS_SILAC_KacIP_CID_120min_AS_1st-1	18547
P21549	Serine--pyruvate aminotransferase	AGXT	1	131.06	1	K	_(ac)ASHK(ac)LLVTPPK_	5	4	P21549_5	2	0.84522	0.56937	0.555675	1.02465	6	MASHKLLVTPPK	200719_HepG2_LPS_Kac_15cm_ExSen_2hr_ooo	9159
Q8TD30	Alanine aminotransferase 2	GPT2	1	147.29	1	K	_LK(ac)TVLQK_	505	2	Q8TD30_505	2	-0.16323	0.87772	0.85788	1.02313	1	LPPVEKLKTVLQKVK	200719_HepG2_LPS_Kac_15cm_ExSen_2hr_ooo	4981
P23526	Adenosylhomocysteinase	AHCY	1	97.384	1	K	_GISEETTTGVHNLYK(ac)MMANGILK_	166	15	P23526_166	3	0.11186	1.0021	0.98025	1.02229	1	TGVHNLYKMMANGIL	20190709_HepG2_LPS_SILAC_KacIP_CID_120min_AS_2nd	31045
F8VQ14	CCT-beta	CCT2	1	150.04	1	K	_ILK(ac)HGINCFINR_	284	3	F8VQ14_284	3	0.50797	1.0559	1.0334	1.02177	3	EKVERILKHGINCFI	20190617_HepG2_LPS_SILAC_KacIP_CID_120min_AS_2nd	13722
P62826	GTP-binding nuclear protein Ran	RAN	1	177.04	1	K	_GPIK(ac)FNVWDTAGQEK_	60	4	P62826_60	2	1.3366	1.084	1.06117	1.02151	4	HTNRGPIKFNVWDTA	20190613_HepG2_LPS_SILAC_KacIP_CID_120min_AS_1st-1	20003
P39023	60S ribosomal protein L3	RPL3	1	110.8	1	K	_IDLK(ac)FIDTTSK_	366	4	P39023_366	2	0.046169	1.0627	1.0408	1.02104	4	ALEKIDLKFIDTTSK	20190613_HepG2_LPS_SILAC_KacIP_CID_120min_AS_1st-2	18123
P30101	Protein disulfide-isomerase A3	PDIA3	1	75.788	1	K	_PSHLTNK(ac)FEDK_	214	7	P30101_214	3	-0.2731	0.9807	0.960995	1.0205	3	RPSHLTNKFEDKTVA	20190613_HepG2_LPS_SILAC_KacIP_CID_120min_AS_2nd-2	5165
A0A0U1RQF0	3-hydroxyacyl-[acyl-carrier-protein] dehydratase	FASN	1	177.57	1	K	_EGVFAK(ac)EVR_	673	6	A0A0U1RQF0_673	2	0.54294	1.0403	1.0197	1.0202	14	RKEGVFAKEVRTGGM	20200603_LPS_SILAC_Kac_IP_Combine_120min	2980
P23527	Histone H2B type 1-O	H2BC17	1	156.48	2	K	_GSK(ac)K(ac)AVTK_	16	3	P23527_16	2	-0.714	1.3101	1.2863	1.0185	9	PAPKKGSKKAVTKAQ	20200603_LPS_SILAC_Kac_IP_Combine_120min	529
B8ZZQ6	Prothymosin alpha	PTMA	1	277.34	1	K	_(ac)SDAAVDTSSEITTK(ac)DLK_	15	14	B8ZZQ6_15	3	0.39813	0.89735	0.881275	1.01824	22	TSSEITTKDLKEKKE	20190709_HepG2_LPS_SILAC_KacIP_CID_120min_AS_2nd	18011
P04040	Catalase	CAT	1	211.9	1	K	_TDQGIK(ac)NLSVEDAAR_	243	6	P04040_243	2	1.0072	0.97511	0.95861	1.01721	4	YKTDQGIKNLSVEDA	20190709_HepG2_LPS_SILAC_KacIP_CID_120min_AS_1st	14245
P0DMV9	Heat shock 70 kDa protein 1B	HSPA1B	1	70.908	1	K	_M(ox)VQEAEK(ac)YK_	524	7	P0DMV9_524	2	-0.54636	1.1695	1.1506	1.01643	2	RMVQEAEKYKAEDEK	200719_HepG2_LPS_Kac_15cm_ExSen_2hr_ooo	5972
P06733	Alpha-enolase	ENO1	1	87.568	1	K	_TIAPALVSK(ac)K_	80	9	P06733_80	2	1.8518	0.89173	0.8785	1.01506	4	IAPALVSKKLNVTEQ	200719_HepG2_LPS_Kac_15cm_ExSen_2hr_ooo	7494
P28370	Probable global transcription activator SNF2L1	SMARCA1	1	132.51	1	K	_DIDVLNSSGK(ac)M(ox)DK_	443	10	P28370_443	2	0.52632	1.0182	1.00476	1.01337	2	DVLNSSGKMDKMRLL	20200603_LPS_SILAC_Kac_IP_Combine_120min	3668
P10412	Histone H1.4	H1-4	1	114.55	1	K	_ASGPPVSELITK(ac)AVAASK_	46	12	P10412_46	2	0.36559	0.87871	0.86769	1.0127	1	PVSELITKAVAASKE	20190709_HepG2_LPS_SILAC_KacIP_CID_120min_AS_1st	28306
A6NLN1	Polypyrimidine tract-binding protein 1	PTBP1	1	45.28	1	K	_LTSLNVK(ac)YNNDK_	236	7	A6NLN1_236	2	0.17195	0.94409	0.93248	1.01245	1	KLTSLNVKYNNDKSR	200719_HepG2_LPS_Kac_15cm_ExSen_2hr_ooo	7506
H0Y5B5	Protein polybromo-1	PBRM1	1	177.67	1	K	_NNQGQLIAEPFYHLPSK(ac)K_	358	17	H0Y5B5_358	3	0.36307	1.0857	1.0739	1.01099	5	PFYHLPSKKKYPDYY	20200603_LPS_SILAC_Kac_IP_Combine_120min	6540
P10809	60 kDa heat shock protein, mitochondrial	HSPD1	0.817277	175.65	1	K	_IQEIIEQLDVTTSEYEK(ac)EKLNER_	387	17	P10809_387	3	-0.083712	0.96467	0.954885	1.01025	1	VTTSEYEKEKLNERL	20190709_HepG2_LPS_SILAC_KacIP_CID_120min_AS_2nd	27496
P38646	Stress-70 protein, mitochondrial	HSPA9	1	152.69	1	K	_NAEK(ac)YAEEDR_	567	4	P38646_567	2	-0.57532	1.0251	1.01573	1.00922	1	NMVKNAEKYAEEDRR	200719_HepG2_LPS_Kac_15cm_ExSen_2hr_ooo	3511
P51659	Peroxisomal multifunctional enzyme type 2	HSD17B4	1	238.72	1	K	_TPSEGGK(ac)LQSTFVFEEIGRR_	621	7	P51659_621	3	0.8723	0.87173	0.86474	1.00808	17	KTPSEGGKLQSTFVF	20190617_HepG2_LPS_SILAC_KacIP_CID_120min_AS_1st	27962
Q9Y696	Chloride intracellular channel protein 4	CLIC4	1	103.04	1	K	_FSAYIK(ac)NSRPEANEALER_	130	6	Q9Y696_130	3	-0.55282	0.92522	0.918295	1.00754	5	AKFSAYIKNSRPEAN	20190709_HepG2_LPS_SILAC_KacIP_CID_120min_AS_2nd	12561
H0YNP9	Guanosine-3',5'-bis	HDDC3	0.999995	79.885	1	K	_LVEEVTDDKTLPK(ac)LER_	97	13	H0YNP9_97	3	0.44592	0.83738	0.83152	1.00705	3	TDDKTLPKLERKRLQ	20200603_LPS_SILAC_Kac_IP_Combine_120min	5193
P07919	Cytochrome b-c1 complex subunit 6, mitochondrial	UQCRH	1	116.24	1	K	_DHCVAHK(ac)LFNNLK_	85	7	P07919_85	3	-1.0151	0.88253	0.876475	1.00691	6	RDHCVAHKLFNNLK	20190709_HepG2_LPS_SILAC_KacIP_CID_120min_AS_1st	13151
S4R3H4	Apoptotic chromatin condensation inducer in the nucleus	ACIN1	1	78.354	1	K	_AAK(ac)LSEGSQPAEEEEDQETPSR_	180	3	S4R3H4_180	3	0.37758	0.96127	0.955615	1.00592	1	VRQARAAKLSEGSQP	200719_HepG2_LPS_Kac_15cm_ExSen_2hr_ooo	6576
P62937	Peptidyl-prolyl cis-trans isomerase A	PPIA	1	168.82	1	K	_VSFELFADK(ac)VPK_	28	9	P62937_28	2	-0.13265	0.9161	0.911095	1.00549	4	SFELFADKVPKTAEN	20190709_HepG2_LPS_SILAC_KacIP_CID_120min_AS_2nd	24006
P62979	Ubiquitin-40S ribosomal protein S27a	RPS27A	1	148.18	1	K	_LIFAGK(ac)QLEDGR_	48	6	P62979_48	2	0.26278	1.1056	1.1	1.00509	9	QRLIFAGKQLEDGRT	200719_HepG2_LPS_Kac_15cm_ExSen_2hr_ooo	11678
A0A0C4DGA2	Enoyl-CoA delta isomerase 2, mitochondrial	ECI2	1	209.22	1	K	_K(ac)NAINTEM(ox)YHEIM(ox)R_	131	1	A0A0C4DGA2_131	3	-0.030476	0.99857	0.99368	1.00492	12	MFNRPKKKNAINTEM	20190709_HepG2_LPS_SILAC_KacIP_CID_120min_AS_1st	13526
P31948	Stress-induced-phosphoprotein 1	STIP1	1	111.77	1	K	_DCEECIQLEPTFIK(ac)GYTR_	429	14	P31948_429	3	0.06158	0.92886	0.92436	1.00487	6	QLEPTFIKGYTRKAA	20190613_HepG2_LPS_SILAC_KacIP_CID_120min_AS_2nd-1	25434
Q92793	CREB-binding protein	CREBBP	1	116.39	2	K	_EESTAASETTEGSQGDSK(ac)NAK(ac)K_	1583	18	Q92793_1583	3	0.7879	0.94751	0.94392	1.0038	2	QGDSKNAKKKNNKKT	200719_HepG2_LPS_Kac_15cm_ExSen_2hr_ooo	3722
Q92793	CREB-binding protein	CREBBP	1	116.39	2	K	_EESTAASETTEGSQGDSK(ac)NAK(ac)K_	1586	21	Q92793_1586	3	0.7879	0.94751	0.94392	1.0038	2	QGDSKNAKKKNNKKT	200719_HepG2_LPS_Kac_15cm_ExSen_2hr_ooo	3722
P04075	Fructose-bisphosphate aldolase A	ALDOA	1	101.75	1	K	_ADDGRPFPQVIK(ac)SK_	99	12	P04075_99	3	-0.2266	0.913	0.911145	1.00204	5	RPFPQVIKSKGGVVG	20200603_LPS_SILAC_Kac_IP_Combine_120min	3436
P22102	Trifunctional purine biosynthetic protein adenosine-3 [Includes: Phosphoribosylamine--glycine ligase	GART	1	57.434	1	K	_ASGLAAGK(ac)GVIVAK_	156	8	P22102_156	2	0.87605	1.063	1.06116	1.00173	1	ASGLAAGKGVIVAKS	200719_HepG2_LPS_Kac_15cm_ExSen_2hr_ooo	8595
Q08426	Peroxisomal bifunctional enzyme	EHHADH	1	243.37	1	K	_M(ox)ITSVLEK(ac)EASK_	346	8	Q08426_346	2	-0.74238	0.87592	0.8746	1.00151	21	MITSVLEKEASKMQQ	20190709_HepG2_LPS_SILAC_KacIP_CID_120min_AS_3rd	15115
P00558	Phosphoglycerate kinase 1	PGK1	1	152.01	1	K	_VDFNVPM(ox)K(ac)NNQITNNQR_	30	8	P00558_30	2	1.1507	0.96119	0.960415	1.00081	6	VDFNVPMKNNQITNN	20190709_HepG2_LPS_SILAC_KacIP_CID_120min_AS_1st	18147
P48735	Isocitrate dehydrogenase [NADP], mitochondrial	IDH2	1	111.11	1	K	_HAHGDQYK(ac)ATDFVADR_	180	8	P48735_180	3	-0.48872	1.0233	1.02263	1.00066	2	HAHGDQYKATDFVAD	20190617_HepG2_LPS_SILAC_KacIP_CID_120min_AS_1st	7544
E9PSF3	Bromodomain and PHD finger-containing protein 3	BRPF3	1	172.88	1	K	_TSAVK(ac)EELK_	546	5	E9PSF3_546	2	0.71744	1.01	1.0103	0.999703	15	DEKTSAVKEELKYWQ	20200603_LPS_SILAC_Kac_IP_Combine_120min	1766
P68104	Elongation factor 1-alpha 1	EEF1A1	1	158.53	1	K	_LPLQDVYK(ac)IGGIGTVPVGR_	255	8	P68104_255	3	-0.097656	1.096	1.0973	0.998815	15	LPLQDVYKIGGIGTV	20200603_LPS_SILAC_Kac_IP_Combine_120min	9794
Q9NR19	Acetyl-coenzyme A synthetase, cytoplasmic	ACSS2	1	198.37	1	K	_LLM(ox)K(ac)FGDEPVTK_	418	4	Q9NR19_418	2	-0.066849	0.86209	0.86316	0.99876	19	TAIRLLMKFGDEPVT	20190709_HepG2_LPS_SILAC_KacIP_CID_120min_AS_1st	18275
Q96AE4	Far upstream element-binding protein 1	FUBP1	1	155.71	1	K	_QIAAK(ac)IGGDAGTSLNSNDYGYGGQK_	44	5	Q96AE4_44	3	-0.59314	0.97162	0.973075	0.998505	6	RARQIAAKIGGDAGT	20190613_HepG2_LPS_SILAC_KacIP_CID_120min_AS_1st-1	16424
H3BPG0	Cytochrome c oxidase subunit 4 isoform 1, mitochondrial	COX4I1	1	124.39	1	K	_FK(ac)ESFAEM(ox)NR_	49	2	H3BPG0_49	2	0.51076	0.98423	0.98692	0.997274	6	ELYRIKFKESFAEMN	20190613_HepG2_LPS_SILAC_KacIP_CID_120min_AS_2nd-2	10361
Q9UIG0	Tyrosine-protein kinase BAZ1B	BAZ1B	1	103.13	1	K	_APPVDDAEVDELVLQTK(ac)R_	1335	17	Q9UIG0_1335	3	0.52128	0.88869	0.891735	0.996585	6	DELVLQTKRSSRRQS	20200603_LPS_SILAC_Kac_IP_Combine_120min	8604
A0A0U1RQF0	3-hydroxyacyl-[acyl-carrier-protein] dehydratase	FASN	1	109.66	1	K	_YM(ox)AQGK(ac)HIGK_	1845	6	A0A0U1RQF0_1845	3	0.46542	1.0162	1.0197	0.996568	16	FRYMAQGKHIGKVVV	20200603_LPS_SILAC_Kac_IP_Combine_120min	857
E9PP50	Cofilin, non-muscle isoform	CFL1	1	260.97	1	K	_YALYDATYETK(ac)ESK_	92	11	E9PP50_92	2	0.16669	1.0068	1.0103	0.996536	6	YDATYETKESKKEDL	20190617_HepG2_LPS_SILAC_KacIP_CID_120min_AS_2nd	15360
P08238	Heat shock protein HSP 90-beta	HSP90AB1	1	165.45	1	K	_K(ac)HLEINPDHPIVETLR_	624	1	P08238_624	3	-0.17319	0.98033	0.9839	0.996372	10	MGYMMAKKHLEINPD	20200603_LPS_SILAC_Kac_IP_Combine_120min	4917
P31040	Succinate dehydrogenase [ubiquinone] flavoprotein subunit, mitochondrial	SDHA	1	73.927	1	K	_AK(ac)NTVVATGGYGR_	250	2	P31040_250	2	-0.33831	0.94175	0.94549	0.996044	1	SIHRIRAKNTVVATG	200719_HepG2_LPS_Kac_15cm_ExSen_2hr_ooo	5436
A8MW49	Fatty acid-binding protein 1	FABP1	1	145.81	1	K	_HFK(ac)FTITAGSK_	49	3	A8MW49_49	2	-0.78609	1.0228	1.0273	0.99562	6	VQNGKHFKFTITAGS	20190617_HepG2_LPS_SILAC_KacIP_CID_120min_AS_2nd	11397
A0A1X7SBS1	Heterogeneous nuclear ribonucleoprotein U	HNRNPU	1	74.789	1	K	_QM(ox)ADTGK(ac)LNTLLQR_	470	7	A0A1X7SBS1_470	2	-0.57154	0.99852	1.003	0.995533	1	KQMADTGKLNTLLQR	200719_HepG2_LPS_Kac_15cm_ExSen_2hr_ooo	11918
P04075	Fructose-bisphosphate aldolase A	ALDOA	1	97.352	1	K	_ALANSLACQGK(ac)YTPSGQAGAAASESLFVSNHAY_	342	11	P04075_342	3	0.10124	0.90632	0.911145	0.994704	7	NSLACQGKYTPSGQA	20190709_HepG2_LPS_SILAC_KacIP_CID_120min_AS_3rd	25157
P33778	Histone H2B type 1-B	H2BC3	1	186.78	2	K	_K(ac)AITK(ac)AQK_	17	1	P33778_17	2	-1.8333	1.2535	1.2609	0.994131	9	APKKGSKKAITKAQK	20200603_LPS_SILAC_Kac_IP_Combine_120min	965
C9JZU6	N-alpha-acetyltransferase 50	NAA50	1	183.41	1	K	_FYK(ac)DVLEVGELAK_	36	3	C9JZU6_36	2	1.6828	0.91374	0.91931	0.993941	11	SYNDKFYKDVLEVGE	20200603_LPS_SILAC_Kac_IP_Combine_120min	8283
P06748	Nucleophosmin	NPM1	1	136.99	1	K	_SK(ac)GQESFK_	223	2	P06748_223	2	-0.07957	0.99235	0.998465	0.993876	2	PSSTPRSKGQESFKK	20190709_HepG2_LPS_SILAC_KacIP_CID_120min_AS_1st	2128
P12236	ADP/ATP translocase 3	SLC25A6	1	86.497	1	K	_QIFLGGVDK(ac)HTQFWR_	105	9	P12236_105	3	-0.61007	1.079	1.08607	0.993486	4	IFLGGVDKHTQFWRY	20200603_LPS_SILAC_Kac_IP_Combine_120min	7517
A0A0U1RQF0	3-hydroxyacyl-[acyl-carrier-protein] dehydratase	FASN	1	303.05	1	K	_GVDLVLNSLAEEK(ac)LQASVR_	1750	13	A0A0U1RQF0_1750	2	0.16157	1.0112	1.0197	0.991664	18	LNSLAEEKLQASVRC	20190613_HepG2_LPS_SILAC_KacIP_CID_120min_AS_1st-1	30740
A0A0U1RQF0	3-hydroxyacyl-[acyl-carrier-protein] dehydratase	FASN	1	188.51	1	K	_AK(ac)TGGAYGEDLGADYNLSQVCDGK_	2447	2	A0A0U1RQF0_2447	3	1.4368	1.0103	1.0197	0.990782	3	NVMLLRAKTGGAYGE	20190709_HepG2_LPS_SILAC_KacIP_CID_120min_AS_1st	20046
P04040	Catalase	CAT	1	90.758	1	K	_ADVLTTGAGNPVGDK(ac)LNVITVGPR_	38	15	P04040_38	3	-0.38184	0.94955	0.95861	0.990549	1	AGNPVGDKLNVITVG	200719_HepG2_LPS_Kac_15cm_ExSen_2hr_ooo	17064
P62937	Peptidyl-prolyl cis-trans isomerase A	PPIA	1	258.68	1	K	_HNGTGGK(ac)SIYGEKFEDENFILK_	76	7	P62937_76	3	0.5659	0.90115	0.911095	0.989085	24	RHNGTGGKSIYGEKF	20200603_LPS_SILAC_Kac_IP_Combine_120min	6021
O43809	Cleavage and polyadenylation specificity factor subunit 5	NUDT21	1	346.06	1	K	_GVTQFGNK(ac)YIQQTKPLTLER_	23	8	O43809_23	2	0.28498	1.0214	1.03345	0.98834	39	GVTQFGNKYIQQTKP	20190617_HepG2_LPS_SILAC_KacIP_CID_120min_AS_1st	13576
P04406	Glyceraldehyde-3-phosphate dehydrogenase	GAPDH	1	162.75	1	K	_WGDAGAEYVVESTGVFTTMEK(ac)AGAHLQGGAK_	107	21	P04406_107	3	0.15353	0.97717	0.98917	0.987869	9	GVFTTMEKAGAHLQG	20190613_HepG2_LPS_SILAC_KacIP_CID_120min_AS_2nd-1	31340
P04075	Fructose-bisphosphate aldolase A	ALDOA	1	124.69	1	K	_CVLK(ac)IGEHTPSALAIM(ox)ENANVLAR_	153	4	P04075_153	3	-1.1476	0.89957	0.911145	0.987296	8	AKWRCVLKIGEHTPS	20190613_HepG2_LPS_SILAC_KacIP_CID_120min_AS_1st-1	28012
P21549	Serine--pyruvate aminotransferase	AGXT	1	231.37	1	K	_ALNAPPGTSLISFSDK(ac)AK_	225	16	P21549_225	3	-0.074928	0.54778	0.555675	0.985792	18	SLISFSDKAKKKMYS	20200603_LPS_SILAC_Kac_IP_Combine_120min	7319
Q08426	Peroxisomal bifunctional enzyme	EHHADH	1	130.29	1	K	_ILADEALK(ac)LGILDK_	165	8	Q08426_165	2	0.31512	0.8621	0.8746	0.985708	4	ILADEALKLGILDKV	20200603_LPS_SILAC_Kac_IP_Combine_120min	9608
P06733	Alpha-enolase	ENO1	1	115.09	1	K	_LNVTEQEK(ac)IDK_	89	8	P06733_89	2	0.011019	0.86547	0.8785	0.985168	4	LNVTEQEKIDKLMIE	20200603_LPS_SILAC_Kac_IP_Combine_120min	2516
A0A0U1RQF0	3-hydroxyacyl-[acyl-carrier-protein] dehydratase	FASN	1	219.03	1	K	_ACLDTAVENM(ox)PSLK(ac)M(ox)K_	1239	14	A0A0U1RQF0_1239	2	-0.60303	1.0037	1.0197	0.984309	26	VENMPSLKMKVVLAG	20190709_HepG2_LPS_SILAC_KacIP_CID_120min_AS_2nd	20437
P42330	Aldo-keto reductase family 1 member C3	AKR1C3	1	63.754	1	K	_IADGSVK(ac)REDIFYTSK_	75	7	P42330_75	3	-0.52131	0.92036	0.93533	0.983995	3	KIADGSVKREDIFYT	20190709_HepG2_LPS_SILAC_KacIP_CID_120min_AS_2nd	13071
P33778	Histone H2B type 1-B	H2BC3	1	186.78	1;2	K	_K(ac)AITK(ac)AQK_	21	5	P33778_21	2	-1.8333	1.2405	1.2609	0.983821	10	APKKGSKKAITKAQK	20200603_LPS_SILAC_Kac_IP_Combine_120min	965
F5H7R9	Parathymosin	PTMS	1	126.77	1	K	_(ac)SEK(ac)SVEAAAELSAK_	4	3	F5H7R9_4	2	-0.32454	0.86201	0.87658	0.983379	1	MSEKSVEAAAE	200719_HepG2_LPS_Kac_15cm_ExSen_2hr_ooo	12477
P06576	ATP synthase subunit beta, mitochondrial	ATP5F1B	1	101.42	1	K	_IM(ox)NVIGEPIDERGPIK(ac)TK_	159	16	P06576_159	3	0.76658	0.94628	0.96249	0.983158	5	IDERGPIKTKQFAPI	20190709_HepG2_LPS_SILAC_KacIP_CID_120min_AS_3rd	16997
P11142	Heat shock cognate 71 kDa protein	HSPA8	1	124.04	1	K	_NQTAEKEEFEHQQK(ac)ELEK_	597	14	P11142_597	3	-0.16443	0.98176	0.99867	0.983067	1	EEFEHQQKELEKVCN	20190613_HepG2_LPS_SILAC_KacIP_CID_120min_AS_1st-1	6046
Q5T280	Putative methyltransferase C9orf114	SPOUT1	1	62.088	1	K	_TVEGEFTGVGK(ac)K_	134	11	Q5T280_134	2	-0.0088136	0.85746	0.87298	0.982222	1	GEFTGVGKKGQACVQ	200719_HepG2_LPS_Kac_15cm_ExSen_2hr_ooo	7363
P48735	Isocitrate dehydrogenase [NADP], mitochondrial	IDH2	1	96.334	1	K	_GK(ac)LDGNQDLIR_	384	2	P48735_384	2	0.52591	1.0024	1.02263	0.980218	3	RGLEHRGKLDGNQDL	200719_HepG2_LPS_Kac_15cm_ExSen_2hr_ooo	8740
P61604	10 kDa heat shock protein, mitochondrial	HSPE1	1	176.25	1	K	_VVLDDK(ac)DYFLFR_	86	6	P61604_86	2	-1.0582	1.0324	1.05356	0.97992	6	TKVVLDDKDYFLFRD	20200603_LPS_SILAC_Kac_IP_Combine_120min	9640
Q9NR45	Sialic acid synthase	NANS	1	85.087	1	K	_VLVTVEEDDTIMEELVDNHGK(ac)K_	355	21	Q9NR45_355	3	-0.82395	0.96452	0.984845	0.979362	4	ELVDNHGKKIKS	20200603_LPS_SILAC_Kac_IP_Combine_120min	9538
Q08426	Peroxisomal bifunctional enzyme	EHHADH	1	104.52	1	K	_LASQGNPPLK(ac)EWQSLAGSPSSK_	710	10	Q08426_710	3	-0.4378	0.85654	0.8746	0.979351	2	SQGNPPLKEWQSLAG	20200603_LPS_SILAC_Kac_IP_Combine_120min	7191
Q15843	NEDD8	NEDD8	1	88.282	1	K	_EIEIDIEPTDK(ac)VER_	22	11	Q15843_22	2	0.19759	0.8666	0.88489	0.979331	1	IDIEPTDKVERIKER	200719_HepG2_LPS_Kac_15cm_ExSen_2hr_ooo	12986
A0A1X7SBS1	Heterogeneous nuclear ribonucleoprotein U	HNRNPU	1	165.58	1	K	_EAAGK(ac)SSGPTSLFAVTVAPPGAR_	186	5	A0A1X7SBS1_186	2	0.39569	0.98224	1.003	0.979302	12	AAKEAAGKSSGPTSL	20190709_HepG2_LPS_SILAC_KacIP_CID_120min_AS_2nd	21600
P31946	14-3-3 protein beta/alpha	YWHAB	1	81.92	1	K	_VISSIEQK(ac)TER_	70	8	P31946_70	2	-0.4011	1.16	1.18525	0.978696	1	VISSIEQKTERNEKK	200719_HepG2_LPS_Kac_15cm_ExSen_2hr_ooo	6562
A0A0C4DGA2	Enoyl-CoA delta isomerase 2, mitochondrial	ECI2	1	227.47	1	K	_ASQK(ac)DFENSM(ox)NQVK_	11	4	A0A0C4DGA2_11	2	-1.3086	0.97222	0.99368	0.978404	3	TAMRASQKDFENSMN	20190709_HepG2_LPS_SILAC_KacIP_CID_120min_AS_3rd	11557
C9JZU6	N-alpha-acetyltransferase 50	NAA50	1	253.06	1	K	_RLNQVIFPVSYNDK(ac)FYK_	33	14	C9JZU6_33	3	0.63636	0.89937	0.91931	0.97831	20	FPVSYNDKFYKDVLE	20190613_HepG2_LPS_SILAC_KacIP_CID_120min_AS_2nd-1	24671
P60174	Triosephosphate isomerase	TPI1	1	113.99	1	K	_VIADNVK(ac)DWSK_	193	7	P60174_193	2	-0.77366	0.9021	0.923275	0.977065	5	HEKLRGWLKSNVSDA	20190709_HepG2_LPS_SILAC_KacIP_CID_120min_AS_1st	13951
O15355	Protein phosphatase 1G	PPM1G	1	122.67	1	K	_GTEAGQVGEPGIPTGEAGPSCSSASDK(ac)LPR_	247	27	O15355_247	3	0.48852	0.84721	0.867225	0.976921	9	SCSSASDKLPRVAKS	200719_HepG2_LPS_Kac_15cm_ExSen_2hr_ooo	11394
Q9Y617	Phosphoserine aminotransferase	PSAT1	1	66.538	1	K	_ALELNM(ox)LSLK(ac)GHR_	333	10	Q9Y617_333	3	-0.13572	1.1936	1.2222	0.9766	4	ELNMLSLKGHRSVGG	20190709_HepG2_LPS_SILAC_KacIP_CID_120min_AS_1st	20708
P39023	60S ribosomal protein L3	RPL3	1	55.66	1	K	_TFK(ac)TVFAEHISDECK_	103	3	P39023_103	3	-0.33428	1.0162	1.0408	0.976364	2	PRGLRTFKTVFAEHI	20190617_HepG2_LPS_SILAC_KacIP_CID_120min_AS_1st	19401
P05783	Keratin, type I cytoskeletal 18	KRT18	1	143.55	1	K	_VVSETNDTK(ac)VLR_	426	9	P05783_426	2	-0.093328	1.1123	1.1397	0.975959	2	VSETNDTKVLRH	20190617_HepG2_LPS_SILAC_KacIP_CID_120min_AS_1st	7342
A0A0C4DGA2	Enoyl-CoA delta isomerase 2, mitochondrial	ECI2	1	101.75	1	K	_KLTAGEACAQGLVTEVFPDSTFQK(ac)EVWTR_	298	24	A0A0C4DGA2_298	3	-0.10449	0.9696	0.99368	0.975767	1	FPDSTFQKEVWTRLK	20190709_HepG2_LPS_SILAC_KacIP_CID_120min_AS_1st	31003
P00441	Superoxide dismutase [Cu-Zn]	SOD1	1	75.608	1	K	_AVCVLK(ac)GDGPVQGIINFEQK_	10	6	P00441_10	3	0.10615	0.88782	0.9128	0.972634	2	TKAVCVLKGDGPVQG	20200603_LPS_SILAC_Kac_IP_Combine_120min	9387
P06748	Nucleophosmin	NPM1	1	104.43	1	K	_AK(ac)M(ox)QASIEK_	250	2	P06748_250	2	-0.31347	0.97105	0.998465	0.972543	1	SVEDIKAKMQASIEK	200719_HepG2_LPS_Kac_15cm_ExSen_2hr_ooo	2441
P11586	C-1-tetrahydrofolate synthase, cytoplasmic	MTHFD1	1	107.17	1	K	_DDSNLYINVK(ac)LK_	56	10	P11586_56	2	-0.046653	0.928	0.95479	0.971941	1	SNLYINVKLKAAEEI	20190613_HepG2_LPS_SILAC_KacIP_CID_120min_AS_1st-1	18683
Q13268	Dehydrogenase/reductase SDR family member 2, mitochondrial	DHRS2	1	106.38	1	K	_VNCVVPGIIK(ac)TDFSK_	219	10	Q13268_219	3	0.26562	1.0938	1.12555	0.971792	9	CVVPGIIKTDFSKVF	20200603_LPS_SILAC_Kac_IP_Combine_120min	7728
F8VXL2	Dynein light chain	DYNLL1	1	137.01	1	K	_YNIEK(ac)DIAAHIK_	36	5	F8VXL2_36	3	0.72101	0.93797	0.96554	0.971446	4	LEKYNIEKDIAAHIK	20200603_LPS_SILAC_Kac_IP_Combine_120min	5567
B4DLR8	NAD	NQO1	0.997423	136.53	1	K	_DITGK(ac)LKDPANFQYPAESVLAYK_	59	5	B4DLR8_59	3	-0.55432	1.1303	1.16395	0.97109	5	SRKDITGKLKDPANF	20200603_LPS_SILAC_Kac_IP_Combine_120min	9792
P62861	40S ribosomal protein S30	FAU	1	127.17	1	K	_RFVNVVPTFGK(ac)K_	51	11	P62861_51	3	0.79652	0.97321	1.00246	0.970817	13	NVVPTFGKKKGPNAN	20200603_LPS_SILAC_Kac_IP_Combine_120min	6055
P04075	Fructose-bisphosphate aldolase A	ALDOA	1	154.85	1	K	_DGADFAK(ac)WR_	147	7	P04075_147	2	0.91086	0.88386	0.911145	0.970054	16	KDGADFAKWRCVLKI	20200603_LPS_SILAC_Kac_IP_Combine_120min	4604
P51659	Peroxisomal multifunctional enzyme type 2	HSD17B4	1	130.44	1	K	_SGSGK(ac)VYQGPAK_	674	5	P51659_674	2	0.25945	0.83872	0.86474	0.96991	3	DLKSGSGKVYQGPAK	20190709_HepG2_LPS_SILAC_KacIP_CID_120min_AS_1st	4614
Q15233	Non-POU domain-containing octamer-binding protein	NONO	1	99.991	1	K	_(ac)M(ox)QSNK(ac)TFNLEK_	5	5	Q15233_5	2	0.52715	0.96572	0.996375	0.969233	1	MQSNKTFNLEKQ	20200603_LPS_SILAC_Kac_IP_Combine_120min	4352
B5MCP9	40S ribosomal protein S7	RPS7	1	70.54	1	K	_FSGK(ac)HVVFIAQR_	90	4	B5MCP9_90	3	0.16087	0.9472	0.97781	0.968695	3	LEKKFSGKHVVFIAQ	20190617_HepG2_LPS_SILAC_KacIP_CID_120min_AS_2nd	12608
P23284	Peptidyl-prolyl cis-trans isomerase B	PPIB	1	161.19	1	K	_VIK(ac)DFMIQGGDFTRGDGTGGK_	98	3	P23284_98	3	0.3756	1.0578	1.09235	0.968371	10	SKFHRVIKDFMIQGG	20200603_LPS_SILAC_Kac_IP_Combine_120min	6606
P30101	Protein disulfide-isomerase A3	PDIA3	1	134.05	1	K	_K(ac)FLDAGHK_	289	1	P30101_289	3	0.36651	0.93011	0.960995	0.967861	1	RVMMVAKKFLDAGHK	20190613_HepG2_LPS_SILAC_KacIP_CID_120min_AS_2nd-1	4333
Q9Y2W2	WW domain-binding protein 11	WBP11	1	124.78	1	K	_ATATISAK(ac)PQITNPK_	565	8	Q9Y2W2_565	2	0.49985	0.82441	0.85184	0.967799	7	ATATISAKPQITNPK	20190617_HepG2_LPS_SILAC_KacIP_CID_120min_AS_1st	10797
Q15233	Non-POU domain-containing octamer-binding protein	NONO	1	102.28	1	K	_AAPGAEFAPNK(ac)R_	467	11	Q15233_467	2	0.84586	0.96369	0.996375	0.967196	9	GAEFAPNKRRRY	200719_HepG2_LPS_Kac_15cm_ExSen_2hr_ooo	6248
Q5TA02	Glutathione-dependent dehydroascorbate reductase	GSTO1	0.99999	56.569	1	K	_EFTK(ac)LEEVLTNKK_	124	4	Q5TA02_124	3	0.48805	1.0176	1.0525	0.966841	1	EFRKEFTKLEEVLTN	200719_HepG2_LPS_Kac_15cm_ExSen_2hr_ooo	12710
P25788	Proteasome subunit alpha type-3	PSMA3	0.999999	78.814	1	K	_LVLSK(ac)LYEEGSNKR_	57	5	P25788_57	3	-0.13655	1.0436	1.08025	0.966073	1	VEKLVLSKLYEEGSN	200719_HepG2_LPS_Kac_15cm_ExSen_2hr_ooo	10139
P07954	Fumarate hydratase, mitochondrial	FH	1	163.04	1	K	_VPNDK(ac)YYGAQTVR_	66	5	P07954_66	2	-0.33925	0.88004	0.911265	0.965734	8	ELKVPNDKYYGAQTV	20190709_HepG2_LPS_SILAC_KacIP_CID_120min_AS_1st	23805
P12270	Nucleoprotein TPR	TPR	1	203.05	1	K	_SQNTK(ac)ISTQLDFASK_	713	5	P12270_713	2	-0.020068	0.92215	0.95497	0.965632	5	DLRSQNTKISTQLDF	20190613_HepG2_LPS_SILAC_KacIP_CID_120min_AS_1st-1	13981
P06733	Alpha-enolase	ENO1	1	152.34	1	K	_(ac)SILK(ac)IHAR_	5	4	P06733_5	2	0.85294	0.8481	0.8785	0.965396	8	MSILKIHAREIF	20190613_HepG2_LPS_SILAC_KacIP_CID_120min_AS_1st-1	12393
E9PFN5	Glutathione S-transferase kappa	GSTK1	1	236.28	1	K	_NQLK(ac)ETTEAACR_	169	4	E9PFN5_169	2	0.22299	0.88505	0.91774	0.96438	6	PKVKNQLKETTEAAC	20200603_LPS_SILAC_Kac_IP_Combine_120min	1983
P51649	Succinate-semialdehyde dehydrogenase, mitochondrial	ALDH5A1	1	61.11	1	K	_VEK(ac)QVNDAVSK_	394	3	P51649_394	2	1.2758	0.90996	0.9437	0.964247	1	KAVEKVEKQVNDAVS	200719_HepG2_LPS_Kac_15cm_ExSen_2hr_ooo	3821
P45954	Short/branched chain specific acyl-CoA dehydrogenase, mitochondrial	ACADSB	1	47.082	1	K	_K(ac)FAQEQIAPLVSTM(ox)DENSK_	70	1	P45954_70	3	1.3104	1.0001	1.038	0.963487	1	MIKSSVKKFAQEQIA	200719_HepG2_LPS_Kac_15cm_ExSen_2hr_ooo	11795
Q15067	Peroxisomal acyl-coenzyme A oxidase 1	ACOX1	1	116.74	1	K	_IQDK(ac)AIQAVLR_	549	4	Q15067_549	2	-0.12195	1.0004	1.03896	0.962881	4	KLLKIQDKAIQAVLR	20190613_HepG2_LPS_SILAC_KacIP_CID_120min_AS_1st-2	13933
B4DJV2	Citrate synthase	CS	1	225.69	1	K	_GMK(ac)GLVYETSVLDPDEGIRFR_	63	3	B4DJV2_63	3	0.13896	0.93095	0.966915	0.962804	18	YGGMRGMKGLVYETS	20190709_HepG2_LPS_SILAC_KacIP_CID_120min_AS_1st	26522
B7Z9I1	Medium-chain specific acyl-CoA dehydrogenase, mitochondrial	ACADM	1	182.47	1	K	_VAM(ox)GAFDK(ac)TRPVVAAGAVGLAQR_	243	8	B7Z9I1_243	3	-0.88421	0.92965	0.96636	0.962012	10	VAMGAFDKTRPVVAA	20200603_LPS_SILAC_Kac_IP_Combine_120min	6314
P60842	Eukaryotic initiation factor 4A-I	EIF4A1	1	42.947	1	K	_DFTVSAM(ox)HGDM(ox)DQK(ac)ER_	309	14	P60842_309	3	0.60531	1.0754	1.11805	0.961853	1	MHGDMDQKERDVIMR	200719_HepG2_LPS_Kac_15cm_ExSen_2hr_ooo	5372
Q06830	Peroxiredoxin-1	PRDX1	1	169.62	1	K	_ATAVM(ox)PDGQFK(ac)DISLSDYK_	27	11	Q06830_27	2	-1.0404	0.90063	0.93677	0.961421	6	VMPDGQFKDISLSDY	20190617_HepG2_LPS_SILAC_KacIP_CID_120min_AS_2nd	24992
P38646	Stress-70 protein, mitochondrial	HSPA9	1	99.136	1	K	_DIK(ac)NVPFK_	138	3	P38646_138	2	1.3204	0.97577	1.01573	0.960659	5	PEVQKDIKNVPFKIV	20190709_HepG2_LPS_SILAC_KacIP_CID_120min_AS_1st	17790
P49773	Histidine triad nucleotide-binding protein 1	HINT1	1	158.34	1	K	_PGGDTIFGK(ac)IIR_	21	9	P49773_21	2	0.34563	0.90414	0.94141	0.96041	7	GGDTIFGKIIRKEIP	20200603_LPS_SILAC_Kac_IP_Combine_120min	7690
P07737	Profilin-1	PFN1	1	147.49	1	K	_TFVNITPAEVGVLVGK(ac)DR_	54	16	P07737_54	3	0.21685	1.0247	1.067	0.960356	9	EVGVLVGKDRSSFYV	20200603_LPS_SILAC_Kac_IP_Combine_120min	10394
P42330	Aldo-keto reductase family 1 member C3	AKR1C3	1	255.54	1	K	_GVVVLAK(ac)SYNEQR_	270	7	P42330_270	2	0.0031837	0.89774	0.93533	0.959811	5	RGVVVLAKSYNEQRI	20190709_HepG2_LPS_SILAC_KacIP_CID_120min_AS_1st	13284
S4R3H4	Apoptotic chromatin condensation inducer in the nucleus	ACIN1	1	76.073	1	K	_K(ac)PSISITTESLK_	803	1	S4R3H4_803	2	-0.072815	0.91578	0.955615	0.958315	2	STATTQKKPSISITT	200719_HepG2_LPS_Kac_15cm_ExSen_2hr_ooo	10286
P27144	Adenylate kinase 4, mitochondrial	AK4	1	67.997	1	K	_DVAK(ac)PVIELYK_	179	4	P27144_179	2	0.113	0.9331	0.973845	0.958161	4	RQYKDVAKPVIELYK	200719_HepG2_LPS_Kac_15cm_ExSen_2hr_ooo	13287
Q9H0D6	5'-3' exoribonuclease 2	XRN2	1	64.654	1	K	_QWK(ac)PQLGFNR_	796	3	Q9H0D6_796	2	0.83165	0.86681	0.90481	0.958002	2	SSNGRQWKPQLGFNR	200719_HepG2_LPS_Kac_15cm_ExSen_2hr_ooo	11802
P04040	Catalase	CAT	1	118.72	1	K	_(ac)ADSRDPASDQM(ox)QHWK(ac)EQR_	16	15	P04040_16	3	-0.4486	0.91752	0.95861	0.957136	4	SDQMQHWKEQRAAQK	20190709_HepG2_LPS_SILAC_KacIP_CID_120min_AS_1st	14383
P04075	Fructose-bisphosphate aldolase A	ALDOA	1	137.69	1	K	_IVAPGK(ac)GILAADESTGSIAK_	28	6	P04075_28	3	-0.21791	0.86957	0.911145	0.954371	9	HRIVAPGKGILAADE	20190709_HepG2_LPS_SILAC_KacIP_CID_120min_AS_1st	19894
Q93077	Histone H2A type 1-C	H2AC6	1	73.881	1	K	_NDEELNK(ac)LLGR_	96	7	Q93077_96	2	0.59859	1.1354	1.19	0.954118	1	RNDEELNKLLGRVTI	20190617_HepG2_LPS_SILAC_KacIP_CID_120min_AS_2nd	19209
P06733	Alpha-enolase	ENO1	1	55.588	1	K	_AAVPSGASTGIYEALELRDNDK(ac)TR_	54	22	P06733_54	3	-0.44273	0.83803	0.8785	0.953933	3	LELRDNDKTRYMGKG	200719_HepG2_LPS_Kac_15cm_ExSen_2hr_ooo	13463
Q08426	Peroxisomal bifunctional enzyme	EHHADH	1	169.92	1	K	_IHKPDPWLSK(ac)FLSR_	598	10	Q08426_598	3	0.45457	0.83418	0.8746	0.953785	9	KPDPWLSKFLSRYRK	20200603_LPS_SILAC_Kac_IP_Combine_120min	6537
P13984	General transcription factor IIF subunit 2	GTF2F2	1	107.06	1	K	_LQIEESSK(ac)PVR_	137	8	P13984_137	2	-0.25257	0.8369	0.877585	0.95364	1	LQIEESSKPVRLSQQ	200719_HepG2_LPS_Kac_15cm_ExSen_2hr_ooo	6918
A0A087WYS1	UTP--glucose-1-phosphate uridylyltransferase	UGP2	1	42.958	1	K	_ADVK(ac)GGTLTQYEGK_	291	4	A0A087WYS1_291	2	0.081185	0.9039	0.948375	0.953104	1	NKTRADVKGGTLTQY	200719_HepG2_LPS_Kac_15cm_ExSen_2hr_ooo	7650
P30038	Delta-1-pyrroline-5-carboxylate dehydrogenase, mitochondrial	ALDH4A1	1	143.96	1	K	_VAK(ac)FCYADK_	93	3	P30038_93	2	-1.2029	0.82896	0.870125	0.952691	8	NHGHKVAKFCYADKS	20190617_HepG2_LPS_SILAC_KacIP_CID_120min_AS_2nd	8469
P68104	Elongation factor 1-alpha 1	EEF1A1	1	127.46	1	K	_K(ac)LEDGPK_	386	1	P68104_386	2	0.13701	1.0452	1.0973	0.95252	3	IDRRSGKKLEDGPKF	20190613_HepG2_LPS_SILAC_KacIP_CID_120min_AS_2nd-2	1154
E7ET15	U2 snRNP-associated SURP motif-containing protein	U2SURP	1	109.56	1	K	_VAPSK(ac)WEAVDESELEAQAVTTSK_	759	5	E7ET15_759	3	-0.94072	1.0464	1.0986	0.952485	5	IFKVAPSKWEAVDES	200719_HepG2_LPS_Kac_15cm_ExSen_2hr_ooo	15516
P12004	Proliferating cell nuclear antigen	PCNA	1	78.166	1	K	_NLAMGVNLTSMSK(ac)ILK_	77	13	P12004_77	2	0.25695	0.86741	0.91111	0.952037	2	VNLTSMSKILKCAGN	20190709_HepG2_LPS_SILAC_KacIP_CID_120min_AS_1st	29665
P31948	Stress-induced-phosphoprotein 1	STIP1	1	50.354	1	K	_(ac)M(ox)EQVNELK(ac)EK_	8	8	P31948_8	2	-0.73467	0.87943	0.92436	0.951393	1	MEQVNELKEKGNKAL	200719_HepG2_LPS_Kac_15cm_ExSen_2hr_ooo	8977
Q15233	Non-POU domain-containing octamer-binding protein	NONO	1	136.01	1	K	_GIVEFSGK(ac)PAAR_	198	8	Q15233_198	2	-0.22436	0.94791	0.996375	0.951359	11	GIVEFSGKPAARKAL	20200603_LPS_SILAC_Kac_IP_Combine_120min	3975
Q93077	Histone H2A type 1-C	H2AC6	1	180.03	2	K	_GK(ac)QGGK(ac)AR_	6	2	Q93077_6	2	-0.97259	1.1319	1.19	0.951176	11	MSGRGKQGGKARA	20200603_LPS_SILAC_Kac_IP_Combine_120min	281
Q93077	Histone H2A type 1-C	H2AC6	1	180.03	2	K	_GK(ac)QGGK(ac)AR_	10	6	Q93077_10	2	-0.97259	1.1319	1.19	0.951176	11	MSGRGKQGGKARA	20200603_LPS_SILAC_Kac_IP_Combine_120min	281
P62857	40S ribosomal protein S28	RPS28	1	89.752	1	K	_VQPIK(ac)LAR_	10	5	P62857_10	2	0.26813	1.0187	1.07125	0.950945	1	TSRVQPIKLARVTKV	200719_HepG2_LPS_Kac_15cm_ExSen_2hr_ooo	6486
P07900	Heat shock protein HSP 90-alpha	HSP90AA1	1	175.65	1	K	_EM(ox)LQQSK(ac)ILK_	407	7	P07900_407	2	-0.99208	1.0056	1.0581	0.950383	16	REMLQQSKILKVIRK	20200603_LPS_SILAC_Kac_IP_Combine_120min	3898
P68104	Elongation factor 1-alpha 1	EEF1A1	1	123.98	1	K	_YEEIVKEVSTYIK(ac)K_	179	13	P68104_179	3	0.34707	1.0422	1.0973	0.949786	7	KEVSTYIKKIGYNPD	20190709_HepG2_LPS_SILAC_KacIP_CID_120min_AS_2nd	20204
E9PP50	Cofilin, non-muscle isoform	CFL1	1	149.49	1	K	_AVLFCLSEDK(ac)K_	44	10	E9PP50_44	2	1.2287	0.95931	1.0103	0.94953	8	LFCLSEDKKNIILEE	20190709_HepG2_LPS_SILAC_KacIP_CID_120min_AS_1st	17696
P07919	Cytochrome b-c1 complex subunit 6, mitochondrial	UQCRH	1	65.179	1	K	_EQCEQLEK(ac)CVK_	42	8	P07919_42	2	-0.2217	0.83209	0.876475	0.94936	1	EQCEQLEKCVKARER	200719_HepG2_LPS_Kac_15cm_ExSen_2hr_ooo	5391
E9PSF3	Bromodomain and PHD finger-containing protein 3	BRPF3	1	96.492	1	K	_GK(ac)PALSR_	769	2	E9PSF3_769	2	0.57357	0.95876	1.0103	0.948985	2	PPKRSRGKPALSRVP	200719_HepG2_LPS_Kac_15cm_ExSen_2hr_ooo	3307
P05091	Aldehyde dehydrogenase, mitochondrial	ALDH2	1	61.344	1	K	_FK(ac)TIEEVVGR_	428	2	P05091_428	2	0.59033	0.92475	0.974465	0.948982	1	VMQILKFKTIEEVVG	200719_HepG2_LPS_Kac_15cm_ExSen_2hr_ooo	11727
P08238	Heat shock protein HSP 90-beta	HSP90AB1	1	84.41	1	K	_K(ac)HSQFIGYPITLYLEK_	204	1	P08238_204	3	0.77076	0.93324	0.9839	0.948511	2	RVKEVVKKHSQFIGY	20190709_HepG2_LPS_SILAC_KacIP_CID_120min_AS_1st	25130
F8WCJ1	Eukaryotic translation initiation factor 5A	EIF5A2	1	152.96	1	K	_IVEM(ox)STSK(ac)TGK_	47	8	F8WCJ1_47	2	0.4747	0.95936	1.0118	0.948172	11	IVEMSTSKTGKHGHA	20200603_LPS_SILAC_Kac_IP_Combine_120min	810
P40227	T-complex protein 1 subunit zeta	CCT6A	1	83.456	1	K	_(ac)AAVK(ac)TLNPK_	5	4	P40227_5	2	-0.63545	0.97741	1.03105	0.947975	1	MAAVKTLNPKAE	200719_HepG2_LPS_Kac_15cm_ExSen_2hr_ooo	9024
Q86YP4	Transcriptional repressor p66-alpha	GATAD2A	1	50.178	1	K	_GTQNIPAGK(ac)PSLQTSSAR_	204	9	Q86YP4_204	2	0.28371	0.8054	0.85011	0.947407	1	TQNIPAGKPSLQTSS	200719_HepG2_LPS_Kac_15cm_ExSen_2hr_ooo	7788
O15355	Protein phosphatase 1G	PPM1G	1	46.318	1	K	_GK(ac)QLIVANAGDSR_	339	2	O15355_339	2	-0.30494	0.82155	0.867225	0.947332	1	VVALIRGKQLIVANA	200719_HepG2_LPS_Kac_15cm_ExSen_2hr_ooo	6985
Q8NC51	Plasminogen activator inhibitor 1 RNA-binding protein	SERBP1	1	231.62	1	K	_SAAQAAAQTNSNAAGK(ac)QLR_	68	16	Q8NC51_68	3	-0.23079	0.90939	0.96052	0.946768	5	TNSNAAGKQLRKESQ	20200603_LPS_SILAC_Kac_IP_Combine_120min	1934
P34897	Serine hydroxymethyltransferase, mitochondrial	SHMT2	1	68.371	1	K	_AVDPK(ac)TGR_	302	5	P34897_302	2	-0.53485	1.0268	1.0846	0.946708	1	GVKAVDPKTGREIPY	200719_HepG2_LPS_Kac_15cm_ExSen_2hr_ooo	2594
A0A0U1RQF0	3-hydroxyacyl-[acyl-carrier-protein] dehydratase	FASN	1	217.22	1	K	_VFTTVGSAEK(ac)R_	1702	10	A0A0U1RQF0_1702	2	0.89925	0.96478	1.0197	0.946141	8	TTVGSAEKRAYLQAR	20200603_LPS_SILAC_Kac_IP_Combine_120min	2256
P40939	Trifunctional enzyme subunit alpha, mitochondrial	HADHA	1	135.72	1	K	_FVDLYGAQK(ac)IVDR_	728	9	P40939_728	2	0.26097	0.92493	0.977645	0.94608	9	VDLYGAQKIVDRLKK	20190613_HepG2_LPS_SILAC_KacIP_CID_120min_AS_1st-1	20471
P53396	ATP-citrate synthase	ACLY	1	61.344	1	K	_VK(ac)SINNPDM(ox)R_	978	2	P53396_978	2	0.74351	1.0505	1.11085	0.945672	1	MGIGHRVKSINNPDM	200719_HepG2_LPS_Kac_15cm_ExSen_2hr_ooo	3786
Q96CN7	Isochorismatase domain-containing protein 1	ISOC1	1	143.4	1	K	_FK(ac)EIQNLIK_	279	2	Q96CN7_279	2	0.20039	0.94865	1.00334	0.945487	6	DKDHPKFKEIQNLIK	200719_HepG2_LPS_Kac_15cm_ExSen_2hr_ooo	11961
P09622	Dihydrolipoyl dehydrogenase, mitochondrial	DLD	1	70.525	1	K	_ILQK(ac)QGFK_	267	4	P09622_267	2	-0.62095	0.91783	0.97184	0.944425	1	NFQRILQKQGFKFKL	200719_HepG2_LPS_Kac_15cm_ExSen_2hr_ooo	5914
O75947	ATP synthase subunit d, mitochondrial	ATP5PD	1	154.69	1	K	_ANVAK(ac)AGLVDDFEK_	63	5	O75947_63	2	0.4576	0.75237	0.79708	0.943908	2	YYKANVAKAGLVDDF	20200603_LPS_SILAC_Kac_IP_Combine_120min	5756
P12270	Nucleoprotein TPR	TPR	1	180.66	1	K	_NQK(ac)LTATTQKQEQIINTMTQDLR_	748	3	P12270_748	3	-0.22609	0.9014	0.95497	0.943904	13	SLHERNQKLTATTQK	20190709_HepG2_LPS_SILAC_KacIP_CID_120min_AS_2nd	23886
F5H669	Cleavage and polyadenylation-specificity factor subunit 7	CPSF7	1	53.924	1	K	_VLISSLK(ac)DCLHGIEAK_	321	7	F5H669_321	3	0.49452	1.0035	1.0639	0.943228	1	RVLISSLKDCLHGIE	20190709_HepG2_LPS_SILAC_KacIP_CID_120min_AS_3rd	23552
P49411	Elongation factor Tu, mitochondrial	TUFM	1	174.72	1	K	_TIGTGLVTNTLAMTEEEK(ac)NIK_	447	18	P49411_447	3	0.74723	0.91785	0.97354	0.942796	7	LAMTEEEKNIKWG	20190709_HepG2_LPS_SILAC_KacIP_CID_120min_AS_1st	27707
P10809	60 kDa heat shock protein, mitochondrial	HSPD1	1	156	1	K	_VGEVIVTK(ac)DDAM(ox)LLK_	352	8	P10809_352	2	0.12605	0.89934	0.954885	0.941831	3	VGEVIVTKDDAMLLK	20190709_HepG2_LPS_SILAC_KacIP_CID_120min_AS_1st	23079
P61956	Small ubiquitin-related modifier 2	SUMO2	1	99.941	1	K	_EGVK(ac)TENNDHINLK_	11	4	P61956_11	3	0.08403	0.91368	0.97023	0.941715	1	EKPKEGVKTENNDHI	200719_HepG2_LPS_Kac_15cm_ExSen_2hr_ooo	5075
A6NIH7	Protein unc-119 homolog B	UNC119B	1	60.062	1	K	_AAAAASAAGPGGLVAGK(ac)EEK_	24	17	A6NIH7_24	2	0.60443	0.81199	0.86443	0.939336	1	PGGLVAGKEEKKKAG	200719_HepG2_LPS_Kac_15cm_ExSen_2hr_ooo	7749
K7ES31	Eukaryotic translation initiation factor 3 subunit K	EIF3K	1	65.246	1	K	_ANVGK(ac)LLK_	13	5	K7ES31_13	2	-0.26391	1.1839	1.2613	0.938635	1	QMRANVGKLLKGIDR	200719_HepG2_LPS_Kac_15cm_ExSen_2hr_ooo	6504
P62937	Peptidyl-prolyl cis-trans isomerase A	PPIA	1	90.614	1	K	_ALSTGEK(ac)GFGYK_	44	7	P62937_44	2	-0.4811	0.85494	0.911095	0.938365	3	RALSTGEKGFGYKGS	200719_HepG2_LPS_Kac_15cm_ExSen_2hr_ooo	7726
O75874	Isocitrate dehydrogenase [NADP] cytoplasmic	IDH1	1	133.81	1	K	_CATITPDEK(ac)RVEEFK_	81	9	O75874_81	3	0.85876	0.99441	1.06015	0.93799	3	ATITPDEKRVEEFKL	200719_HepG2_LPS_Kac_15cm_ExSen_2hr_ooo	4185
P60981	Destrin	DSTN	0.917517	56.039	1	K	_KFQGIK(ac)HECQANGPEDLNR_	132	6	P60981_132	4	-0.13447	0.98061	1.0462	0.937306	1	KKKFQGIKHECQANG	20190709_HepG2_LPS_SILAC_KacIP_CID_120min_AS_1st	7947
M0R1A7	60S ribosomal protein L18a	RPL18A	1	104.82	1	K	_VEEIAASK(ac)CR_	107	8	M0R1A7_107	2	-0.23593	1.0154	1.0839	0.936802	1	VEEIAASKCRRPAVK	200719_HepG2_LPS_Kac_15cm_ExSen_2hr_ooo	4400
P25705	ATP synthase subunit alpha, mitochondrial	ATP5F1A	0.98881	82.121	1	K	_VVDALGNAIDGKGPIGSK(ac)TR_	167	18	P25705_167	3	-0.098526	0.90637	0.967645	0.936676	2	GKGPIGSKTRRRVGL	20190709_HepG2_LPS_SILAC_KacIP_CID_120min_AS_1st	16366
P07237	Protein disulfide-isomerase	P4HB	1	134.29	1	K	_M(ox)DSTANEVEAVK(ac)VHSFPTLK_	436	12	P07237_436	3	-0.45435	0.92087	0.983695	0.936134	12	ANEVEAVKVHSFPTL	20200603_LPS_SILAC_Kac_IP_Combine_120min	7341
A0A1X7SBS1	Heterogeneous nuclear ribonucleoprotein U	HNRNPU	1	63.076	1	K	_(ac)SSSPVNVK(ac)K_	9	8	A0A1X7SBS1_9	2	-0.56864	0.93893	1.003	0.936122	1	SSSPVNVKKLKVSEL	200719_HepG2_LPS_Kac_15cm_ExSen_2hr_ooo	5815
P31948	Stress-induced-phosphoprotein 1	STIP1	1	56.514	1	K	_DAIHFYNK(ac)SLAEHR_	325	8	P31948_325	3	-0.2335	0.8653	0.92436	0.936107	2	DAIHFYNKSLAEHRT	20200603_LPS_SILAC_Kac_IP_Combine_120min	3976
P51659	Peroxisomal multifunctional enzyme type 2	HSD17B4	1	145.66	1	K	_K(ac)ICDFENASKPQSIQESTGSIIEVLSK_	275	1	P51659_275	3	0.0099879	0.80945	0.86474	0.936062	3	AVKANWKKICDFENA	20190709_HepG2_LPS_SILAC_KacIP_CID_120min_AS_1st	28433
P04406	Glyceraldehyde-3-phosphate dehydrogenase	GAPDH	1	141.37	1	K	_VVDLM(ox)AHM(ox)ASK(ac)E_	334	11	P04406_334	2	0.0087488	0.92592	0.98917	0.936058	19	LMAHMASKE	200719_HepG2_LPS_Kac_15cm_ExSen_2hr_ooo	5656
P17096	High mobility group protein HMG-I/HMG-Y	HMGA1	1	230.23	1	K	_(ac)SESSSK(ac)SSQPLASK_	7	6	P17096_7	2	-1.1496	0.85918	0.91821	0.935712	5	MSESSSKSSQPLAS	20190709_HepG2_LPS_SILAC_KacIP_CID_120min_AS_1st	6502
P07237	Protein disulfide-isomerase	P4HB	1	116.86	1	K	_VHSFPTLK(ac)FFPASADR_	444	8	P07237_444	3	-0.11268	0.9196	0.983695	0.934843	7	VHSFPTLKFFPASAD	20200603_LPS_SILAC_Kac_IP_Combine_120min	7700
P23527	Histone H2B type 1-O	H2BC17	1	176.99	1	K	_HAVSEGTK(ac)AVTK_	117	8	P23527_117	2	-0.1216	1.2021	1.2863	0.934541	9	HAVSEGTKAVTKYTS	20190617_HepG2_LPS_SILAC_KacIP_CID_120min_AS_2nd	1359
A0A0U1RQF0	3-hydroxyacyl-[acyl-carrier-protein] dehydratase	FASN	1	157.22	1	K	_FDASFFGVHPK(ac)QAHTM(ox)DPQLR_	70	11	A0A0U1RQF0_70	4	0.56235	0.95289	1.0197	0.934481	23	SFFGVHPKQAHTMDP	20200603_LPS_SILAC_Kac_IP_Combine_120min	6156
P10809	60 kDa heat shock protein, mitochondrial	HSPD1	1	110.54	1	K	_SIAK(ac)EGFEK_	125	4	P10809_125	2	0.061647	0.89216	0.954885	0.934311	4	VLARSIAKEGFEKIS	20190709_HepG2_LPS_SILAC_KacIP_CID_120min_AS_1st	6986
A0A3B3ITZ9	Thyroid hormone receptor-associated protein 3	THRAP3	1	68.044	1	K	_SPALK(ac)SPLQSVVVR_	252	5	A0A3B3ITZ9_252	2	0.30726	0.93039	0.99705	0.933143	1	RERSPALKSPLQSVV	200719_HepG2_LPS_Kac_15cm_ExSen_2hr_ooo	12583
P09429	High mobility group protein B1	HMGB1	1	80.102	1	K	_K(ac)HPDASVNFSEFSK_	30	1	P09429_30	3	0.19111	0.87742	0.94029	0.933138	4	CREEHKKKHPDASVN	20190617_HepG2_LPS_SILAC_KacIP_CID_120min_AS_2nd	12832
P62979	Ubiquitin-40S ribosomal protein S27a	RPS27A	1	130.29	1	K	_TLSDYNIQK(ac)ESTLHLVLR_	63	9	P62979_63	3	-0.26814	1.026	1.1	0.932727	9	LSDYNIQKESTLHLV	20190613_HepG2_LPS_SILAC_KacIP_CID_120min_AS_1st-1	22775
P31040	Succinate dehydrogenase [ubiquinone] flavoprotein subunit, mitochondrial	SDHA	1	94.09	1	K	_VGSVLQEGCGK(ac)ISK_	538	11	P31040_538	2	0.66225	0.88059	0.94549	0.931358	1	VLQEGCGKISKLYGD	200719_HepG2_LPS_Kac_15cm_ExSen_2hr_ooo	7972
P62269	40S ribosomal protein S18	RPS18	1	106.6	1	K	_YSQVLANGLDNK(ac)LREDLER_	106	12	P62269_106	3	0.61289	0.93716	1.00636	0.931242	2	LANGLDNKLREDLER	20190613_HepG2_LPS_SILAC_KacIP_CID_120min_AS_1st-1	16992
P11387	DNA topoisomerase 1	TOP1	1	61.344	1	K	_DEDDADYK(ac)PK_	148	8	P11387_148	2	0.84147	0.91601	0.9837	0.931188	1	DEDDADYKPKKIKTE	200719_HepG2_LPS_Kac_15cm_ExSen_2hr_ooo	4927
Q02318	Sterol 26-hydroxylase, mitochondrial	CYP27A1	1	74.301	1	K	_AVLK(ac)ETLR_	391	4	Q02318_391	2	0.11665	0.84273	0.906815	0.92933	1	PLLKAVLKETLRLYP	200719_HepG2_LPS_Kac_15cm_ExSen_2hr_ooo	6606
P19338	Nucleolin	NCL	1	58.098	1	K	_SK(ac)GIAYIEFK_	429	2	P19338_429	2	0.24025	0.94578	1.01775	0.929285	2	VSKDGKSKGIAYIEF	200719_HepG2_LPS_Kac_15cm_ExSen_2hr_ooo	11869
A0A024R4M0	40S ribosomal protein S9	RPS9	1	62.732	1	K	_LDSQK(ac)HIDFSLR_	155	5	A0A024R4M0_155	3	1.2714	1.1675	1.2568	0.928947	3	IVRLDSQKHIDFSLR	20190709_HepG2_LPS_SILAC_KacIP_CID_120min_AS_1st	15467
P11413	Glucose-6-phosphate 1-dehydrogenase	G6PD	1	73.499	1	K	_NVK(ac)LPDAYER_	432	3	P11413_432	2	-0.76105	0.97213	1.0466	0.928846	1	GNRYKNVKLPDAYER	200719_HepG2_LPS_Kac_15cm_ExSen_2hr_ooo	8091
P11021	Endoplasmic reticulum chaperone BiP	HSPA5	1	109.79	1	K	_VM(ox)EHFIK(ac)LYK_	268	7	P11021_268	3	-0.72966	1.0069	1.0849	0.928104	9	RVMEHFIKLYKKKTG	20190617_HepG2_LPS_SILAC_KacIP_CID_120min_AS_2nd	15892
Q13268	Dehydrogenase/reductase SDR family member 2, mitochondrial	DHRS2	1	155.66	1	K	_TLALELAPK(ac)DIR_	206	9	Q13268_206	2	-0.52717	1.0443	1.12555	0.927813	10	LALELAPKDIRVNCV	20200603_LPS_SILAC_Kac_IP_Combine_120min	7001
A0A0U1RQF0	3-hydroxyacyl-[acyl-carrier-protein] dehydratase	FASN	1	94.767	1	K	_SDEAVK(ac)PFGLK_	528	6	A0A0U1RQF0_528	2	-0.28523	0.9458	1.0197	0.927528	2	LRSDEAVKPFGLKVS	20200603_LPS_SILAC_Kac_IP_Combine_120min	4508
P51659	Peroxisomal multifunctional enzyme type 2	HSD17B4	1	94.007	1	K	_VLHGEQYLELYK(ac)PLPR_	415	12	P51659_415	3	0.24524	0.80197	0.86474	0.927412	2	EQYLELYKPLPRAGK	20190709_HepG2_LPS_SILAC_KacIP_CID_120min_AS_1st	21695
P36578	60S ribosomal protein L4	RPL4	1	118.28	1	K	_SDEK(ac)AAVAGK_	368	4	P36578_368	2	2.4363	0.99422	1.0722	0.927271	1	LQAKSDEKAAVAGKK	200719_HepG2_LPS_Kac_15cm_ExSen_2hr_ooo	2808
P23527	Histone H2B type 1-O	H2BC17	1	97.602	1	K	_LAHYNK(ac)R_	86	6	P23527_86	3	1.1199	1.1916	1.2863	0.926378	5	SRLAHYNKRSTITSR	20190613_HepG2_LPS_SILAC_KacIP_CID_120min_AS_2nd-2	614
Q15067	Peroxisomal acyl-coenzyme A oxidase 1	ACOX1	1	97.352	1	K	_SYDQVHSGK(ac)LVCGMVSYLNDLPSQR_	446	9	Q15067_446	3	-0.60052	0.96241	1.03896	0.926316	4	YDQVHSGKLVCGMVS	20190613_HepG2_LPS_SILAC_KacIP_CID_120min_AS_2nd-2	24825
K7EME0	3-ketoacyl-CoA thiolase, mitochondrial	ACAA2	1	111.5	1	K	_FGTK(ac)LGSDIK_	82	4	K7EME0_82	2	0.2686	0.88605	0.95702	0.925843	3	RNVRFGTKLGSDIKL	200719_HepG2_LPS_Kac_15cm_ExSen_2hr_ooo	7913
A0A024RA52	Proteasome subunit alpha type	PSMA2	1	150.14	1	K	_NYVNGK(ac)TFLEK_	171	6	A0A024RA52_171	2	2.0341	0.94849	1.025	0.925356	3	GKNYVNGKTFLEKRY	20200603_LPS_SILAC_Kac_IP_Combine_120min	4420
A0A024RA52	Proteasome subunit alpha type	PSMA2	1	184.6	1	K	_K(ac)LAQQYYLVYQEPIPTAQLVQR_	92	1	A0A024RA52_92	3	0.40713	0.94715	1.025	0.924049	10	VLVHRARKLAQQYYL	20190709_HepG2_LPS_SILAC_KacIP_CID_120min_AS_1st	27684
A0A1X7SBS1	Heterogeneous nuclear ribonucleoprotein U	HNRNPU	1	140.03	1	K	_APQCLGK(ac)FIEIAAR_	484	7	A0A1X7SBS1_484	2	0.026985	0.92664	1.003	0.923868	6	RAPQCLGKFIEIAAR	20200603_LPS_SILAC_Kac_IP_Combine_120min	8417
J3QR09	Ribosomal protein L19	RPL19	0.970748	112.13	1	K	_LQAK(ac)KEEIIK_	177	4	J3QR09_177	3	-0.35004	0.98694	1.069	0.923237	4	REERLQAKKEEIIKT	200719_HepG2_LPS_Kac_15cm_ExSen_2hr_ooo	4559
P62937	Peptidyl-prolyl cis-trans isomerase A	PPIA	1	140.82	1	K	_TEWLDGK(ac)HVVFGK_	125	7	P62937_125	2	0.024569	0.8402	0.911095	0.922187	19	KTEWLDGKHVVFGKV	20200603_LPS_SILAC_Kac_IP_Combine_120min	6195
P07900	Heat shock protein HSP 90-alpha	HSP90AA1	1	88.427	1	K	_K(ac)HLEINPDHSIIETLR_	632	1	P07900_632	3	-0.11665	0.97537	1.0581	0.921813	5	MGYMAAKKHLEINPD	20200603_LPS_SILAC_Kac_IP_Combine_120min	5725
P14618	Pyruvate kinase PKM	PKM	1	191.07	1	K	_GADFLVTEVENGGSLGSK(ac)K_	206	18	P14618_206	3	0.26403	0.82332	0.893515	0.921439	5	NGGSLGSKKGVNLPG	20200603_LPS_SILAC_Kac_IP_Combine_120min	7914
P09327	Villin-1	VIL1	1	54.393	1	K	_TSGLGK(ac)THTVGSVAK_	360	6	P09327_360	3	-0.079473	0.82628	0.896975	0.921185	1	NRTSGLGKTHTVGSV	200719_HepG2_LPS_Kac_15cm_ExSen_2hr_ooo	4089
P10809	60 kDa heat shock protein, mitochondrial	HSPD1	1	139.31	1	K	_NIGAK(ac)LVQDVANNTNEEAGDGTTTATVLAR_	96	5	P10809_96	3	0.19212	0.87921	0.954885	0.92075	9	KYKNIGAKLVQDVAN	20190617_HepG2_LPS_SILAC_KacIP_CID_120min_AS_2nd	27945
P19338	Nucleolin	NCL	1	152.16	1	K	_GGK(ac)NSTWSGESK_	477	3	P19338_477	2	-0.25433	0.93688	1.01775	0.92054	3	NQDYRGGKNSTWSGE	20200603_LPS_SILAC_Kac_IP_Combine_120min	1189
P48047	ATP synthase subunit O, mitochondrial	ATP5PO	1	103.44	1	K	_LEQVEK(ac)ELLR_	60	6	P48047_60	2	0.64129	0.99819	1.08482	0.920148	9	NKLEQVEKELLRVAQ	200719_HepG2_LPS_Kac_15cm_ExSen_2hr_ooo	10734
Q13268	Dehydrogenase/reductase SDR family member 2, mitochondrial	DHRS2	1	188.48	1	K	_LQGEGLSVAGIVCHVGK(ac)AEDREQLVAK_	96	17	Q13268_96	4	-1.1641	1.0356	1.12555	0.920084	26	GIVCHVGKAEDREQL	20190709_HepG2_LPS_SILAC_KacIP_CID_120min_AS_2nd	21542
P34897	Serine hydroxymethyltransferase, mitochondrial	SHMT2	1	212.1	1	K	_SFLLK(ac)DSETSQR_	474	5	P34897_474	2	0.97633	0.99775	1.0846	0.919924	9	DFKSFLLKDSETSQR	20190709_HepG2_LPS_SILAC_KacIP_CID_120min_AS_1st	13253
P62805	Histone H4	H4C1	1	187.74	1	K	_DNIQGITK(ac)PAIR_	32	8	P62805_32	2	0.77098	1.1496	1.25045	0.919349	10	DNIQGITKPAIRRLA	20190613_HepG2_LPS_SILAC_KacIP_CID_120min_AS_1st-1	13484
P04075	Fructose-bisphosphate aldolase A	ALDOA	1	162.67	1	K	_ALQASALK(ac)AWGGK_	312	8	P04075_312	2	-0.26459	0.83667	0.911145	0.918262	9	ALQASALKAWGGKKE	20190613_HepG2_LPS_SILAC_KacIP_CID_120min_AS_2nd-2	14062
Q5QNZ2	ATP synthase F	ATP5PB	1	120.99	1	K	_HVVQSISTQQEK(ac)ETIAK_	172	12	Q5QNZ2_172	3	0.18419	0.87647	0.95466	0.918096	5	SISTQQEKETIAKCI	200719_HepG2_LPS_Kac_15cm_ExSen_2hr_ooo	6616
O00299	Chloride intracellular channel protein 1	CLIC1	1	131.04	1	K	_GLLK(ac)ALK_	135	4	O00299_135	2	-0.48998	0.9245	1.00731	0.917791	5	NLEKGLLKALKVLDN	20190709_HepG2_LPS_SILAC_KacIP_CID_120min_AS_1st	11119
Q9UK76	Jupiter microtubule associated homolog 1	JPT1	1	70.089	1	K	_RNPPGGK(ac)SSLVLG_	148	7	Q9UK76_148	2	0.55941	0.9341	1.01804	0.917552	1	RRNPPGGKSSLVLG	200719_HepG2_LPS_Kac_15cm_ExSen_2hr_ooo	7961
P40925	Malate dehydrogenase, cytoplasmic	MDH1	1	68.224	1	K	_DLLK(ac)ANVK_	103	4	P40925_103	2	0.54223	0.88761	0.967535	0.917393	1	MERKDLLKANVKIFK	200719_HepG2_LPS_Kac_15cm_ExSen_2hr_ooo	7194
Q9C005	Protein dpy-30 homolog	DPY30	1	142.08	1	K	_IVENEK(ac)INAEK_	35	6	Q9C005_35	2	0.13642	0.80679	0.87978	0.917036	1	ERIVENEKINAEKSS	200719_HepG2_LPS_Kac_15cm_ExSen_2hr_ooo	4884
P09622	Dihydrolipoyl dehydrogenase, mitochondrial	DLD	1	170.4	1	K	_LNLDK(ac)M(ox)M(ox)EQK_	122	5	P09622_122	2	0.54712	0.89097	0.97184	0.916787	1	EVRLNLDKMMEQKST	200719_HepG2_LPS_Kac_15cm_ExSen_2hr_ooo	5158
P42704	Leucine-rich PPR motif-containing protein, mitochondrial	LRPPRC	1	90.15	1	K	_QTLEK(ac)VEK_	292	5	P42704_292	2	0.83795	0.99078	1.0812	0.916371	1	HVKQTLEKVEKSELH	200719_HepG2_LPS_Kac_15cm_ExSen_2hr_ooo	3761
P46060	Ran GTPase-activating protein 1	RANGAP1	1	90.793	1	K	_LLVHMGLLK(ac)SEDK_	524	9	P46060_524	3	-0.22376	0.87722	0.959195	0.914538	2	LVHMGLLKSEDKVKA	20200603_LPS_SILAC_Kac_IP_Combine_120min	5549
P04406	Glyceraldehyde-3-phosphate dehydrogenase	GAPDH	1	190.53	1	K	_TVDGPSGK(ac)LWR_	194	8	P04406_194	2	0.0838	0.90456	0.98917	0.914464	11	TVDGPSGKLWRDGRG	20200603_LPS_SILAC_Kac_IP_Combine_120min	4035
Q96PK6	RNA-binding protein 14	RBM14	1	94.122	1	K	_GPGLAVQSGDK(ac)TK_	164	11	Q96PK6_164	2	-0.095184	0.84157	0.921345	0.913415	2	LAVQSGDKTKKPGAG	200719_HepG2_LPS_Kac_15cm_ExSen_2hr_ooo	4753
P68363	Tubulin alpha-1B chain	TUBA1B	1	90.464	1	K	_TIGGGDDSFNTFFSETGAGK(ac)HVPR_	60	20	P68363_60	3	-0.21604	0.99201	1.08615	0.913327	11	FSETGAGKHVPRAVF	20200603_LPS_SILAC_Kac_IP_Combine_120min	7803
Q9Y230	RuvB-like 2	RUVBL2	1	128.54	1	K	_(ac)ATVTATTK(ac)VPEIR_	9	8	Q9Y230_9	2	0.023969	0.95853	1.0509	0.912108	2	ATVTATTKVPEIRDV	200719_HepG2_LPS_Kac_15cm_ExSen_2hr_ooo	12898
P49458	Signal recognition particle 9 kDa protein	SRP9	1	187.04	1	K	_HSDGNLCVK(ac)VTDDLVCLVYK_	41	9	P49458_41	3	0.44404	0.89404	0.980245	0.912058	9	SDGNLCVKVTDDLVC	20190709_HepG2_LPS_SILAC_KacIP_CID_120min_AS_1st	32485
Q13564	NEDD8-activating enzyme E1 regulatory subunit	NAE1	1	161.02	1	K	_(ac)AQLGK(ac)LLK_	6	5	Q13564_6	2	0.68884	0.846	0.92761	0.912021	13	MAQLGKLLKEQKY	20190617_HepG2_LPS_SILAC_KacIP_CID_120min_AS_2nd	24195
P10809	60 kDa heat shock protein, mitochondrial	HSPD1	1	137.95	1	K	_LAK(ac)LSDGVAVLK_	396	3	P10809_396	2	-1.5705	0.87074	0.954885	0.911879	11	KLNERLAKLSDGVAV	20200603_LPS_SILAC_Kac_IP_Combine_120min	5619
P61978	Heterogeneous nuclear ribonucleoprotein K	HNRNPK	1	132.15	1	K	_LLIHQSLAGGIIGVK(ac)GAK_	163	15	P61978_163	3	-0.18058	0.90658	0.9942	0.911869	6	AGGIIGVKGAKIKEL	20190709_HepG2_LPS_SILAC_KacIP_CID_120min_AS_1st	19569
B5MCW3	Bromodomain-containing protein 8	BRD8	1	148.52	1	K	_(ac)ATGTGK(ac)HK_	7	6	B5MCW3_7	2	0.98633	0.94474	1.0365	0.911471	5	MATGTGKHKLLS	20200603_LPS_SILAC_Kac_IP_Combine_120min	298
P05783	Keratin, type I cytoskeletal 18	KRT18	1	87.641	1	K	_K(ac)VIDDTNITR_	187	1	P05783_187	2	-0.75393	1.0384	1.1397	0.911117	3	NDIHGLRKVIDDTNI	20190709_HepG2_LPS_SILAC_KacIP_CID_120min_AS_2nd	8487
P42330	Aldo-keto reductase family 1 member C3	AKR1C3	1	151.38	1	K	_DAGLAK(ac)SIGVSNFNR_	161	6	P42330_161	2	0.65633	0.85194	0.93533	0.910844	4	CKDAGLAKSIGVSNF	20200603_LPS_SILAC_Kac_IP_Combine_120min	6134
P55060	Exportin-2	CSE1L	1	98.458	1	K	_TAHSLFK(ac)R_	158	7	P55060_158	3	0.48704	0.94187	1.03449	0.910472	2	RTAHSLFKRYRHEFK	20190617_HepG2_LPS_SILAC_KacIP_CID_120min_AS_2nd	4870
P60709	Actin, cytoplasmic 1	ACTB	1	156.52	1	K	_EITALAPSTM(ox)K(ac)IK_	326	11	P60709_326	2	-0.15504	0.86601	0.951655	0.910004	18	ALAPSTMKIKIIAPP	20190613_HepG2_LPS_SILAC_KacIP_CID_120min_AS_2nd-1	16118
Q15274	Nicotinate-nucleotide pyrophosphorylase [carboxylating]	QPRT	1	136.64	1	K	_YDLGGLVM(ox)VK(ac)DNHVVAAGGVEK_	171	10	Q15274_171	3	-2.1302	1.035	1.1384	0.909171	12	LGGLVMVKDNHVVAA	20200603_LPS_SILAC_Kac_IP_Combine_120min	7580
P16403	Histone H1.2	H1-2	1	93.215	1	K	_(ac)SETAPAAPAAAPPAEK(ac)APVK_	17	16	P16403_17	3	-1.9491	0.84332	0.928985	0.907786	17	AAAPPAEKAPVKKKA	20190617_HepG2_LPS_SILAC_KacIP_CID_120min_AS_2nd	15105
P51659	Peroxisomal multifunctional enzyme type 2	HSD17B4	1	108.97	1	K	_LDPQK(ac)AFFSGR_	707	5	P51659_707	2	0.70682	0.78464	0.86474	0.907371	10	LGKLDPQKAFFSGRL	20190709_HepG2_LPS_SILAC_KacIP_CID_120min_AS_2nd	15997
H3BQ52	cAMP-regulated phosphoprotein 19	ARPP19	1	114.51	1	K	_K(ac)PSLVASK_	61	1	H3BQ52_61	2	0.59572	0.69478	0.76644	0.906503	1	PQDLPQRKPSLVASK	200719_HepG2_LPS_Kac_15cm_ExSen_2hr_ooo	4270
Q15648	Mediator of RNA polymerase II transcription subunit 1	MED1	1	64.454	1	K	_NSSQSGGK(ac)PGSSPITK_	1152	8	Q15648_1152	2	-0.4994	0.85053	0.94007	0.904752	1	NSSQSGGKPGSSPIT	200719_HepG2_LPS_Kac_15cm_ExSen_2hr_ooo	3619
P55072	Transitional endoplasmic reticulum ATPase	VCP	1	123.29	1	K	_ELQELVQYPVEHPDK(ac)FLK_	502	15	P55072_502	3	0.075452	0.94668	1.0464	0.904702	8	YPVEHPDKFLKFGMT	20200603_LPS_SILAC_Kac_IP_Combine_120min	8494
P10809	60 kDa heat shock protein, mitochondrial	HSPD1	1	141.07	1	K	_VGEVIVTKDDAM(ox)LLK(ac)GK_	359	15	P10809_359	3	0.40345	0.86387	0.954885	0.904685	7	KDDAMLLKGKGDKAQ	20200603_LPS_SILAC_Kac_IP_Combine_120min	6208
Q9ULC5	Long-chain-fatty-acid--CoA ligase 5	ACSL5	1	77.744	1	K	_IYDK(ac)VQNEAK_	361	4	Q9ULC5_361	2	0.56208	0.73123	0.808435	0.904501	1	LLNRIYDKVQNEAKT	200719_HepG2_LPS_Kac_15cm_ExSen_2hr_ooo	4812
P62805	Histone H4	H4C1	1	145.46	2	K	_GK(ac)GGK(ac)GLGK_	6	2	P62805_6	2	-1.0274	1.131	1.25045	0.904474	11	MSGRGKGGKGLGK	20190709_HepG2_LPS_SILAC_KacIP_CID_120min_AS_1st	2248
P13639	Elongation factor 2	EEF2	1	126.1	1	K	_VFSGLVSTGLK(ac)VR_	426	11	P13639_426	2	-0.19017	0.91282	1.0093	0.904409	2	GLVSTGLKVRIMGPN	20190617_HepG2_LPS_SILAC_KacIP_CID_120min_AS_1st	21528
P04406	Glyceraldehyde-3-phosphate dehydrogenase	GAPDH	1	151.44	1	K	_VIPELNGK(ac)LTGM(ox)AFR_	227	8	P04406_227	3	-0.33122	0.89384	0.98917	0.903626	15	VIPELNGKLTGMAFR	20190709_HepG2_LPS_SILAC_KacIP_CID_120min_AS_3rd	25393
Q5TA02	Glutathione-dependent dehydroascorbate reductase	GSTO1	1	137.85	1	K	_LEEVLTNK(ac)K_	132	8	Q5TA02_132	2	-0.50674	0.94963	1.0525	0.902261	5	LEEVLTNKKTTFFGG	20200603_LPS_SILAC_Kac_IP_Combine_120min	2305
P60842	Eukaryotic initiation factor 4A-I	EIF4A1	1	70.907	1	K	_AEVQK(ac)LQM(ox)EAPHIIVGTPGR_	146	5	P60842_146	3	-0.75192	1.0087	1.11805	0.902196	3	NVRAEVQKLQMEAPH	200719_HepG2_LPS_Kac_15cm_ExSen_2hr_ooo	11702
P10599	Thioredoxin	TXN	1	69.864	1	K	_VGEFSGANK(ac)EK_	94	9	P10599_94	2	-0.073506	0.96899	1.0747	0.901638	1	GEFSGANKEKLEATI	200719_HepG2_LPS_Kac_15cm_ExSen_2hr_ooo	4239
P50990	T-complex protein 1 subunit theta	CCT8	1	258.41	1	K	_AVDDGVNTFK(ac)VLTR_	400	10	P50990_400	2	0.28761	0.97162	1.0778	0.901485	13	DDGVNTFKVLTRDKR	20200603_LPS_SILAC_Kac_IP_Combine_120min	6897
P00367	Glutamate dehydrogenase 1, mitochondrial	GLUD1	1	251.91	1	K	_TAM(ox)K(ac)YNLGLDLR_	527	4	P00367_527	2	0.51809	0.86337	0.95784	0.901372	19	QIMRTAMKYNLGLDL	20190613_HepG2_LPS_SILAC_KacIP_CID_120min_AS_1st-1	19856
P62805	Histone H4	H4C1	1	145.46	1;2	K	_GK(ac)GGK(ac)GLGK_	9	5	P62805_9	2	-1.0274	1.1271	1.25045	0.901356	11	MSGRGKGGKGLGK	20200603_LPS_SILAC_Kac_IP_Combine_120min	1062
P04040	Catalase	CAT	1	151.16	1	K	_AAQK(ac)ADVLTTGAGNPVGDKLNVITVGPR_	23	4	P04040_23	3	-0.075659	0.86398	0.95861	0.901284	1	KEQRAAQKADVLTTG	20190709_HepG2_LPS_SILAC_KacIP_CID_120min_AS_1st	22941
Q12906	Interleukin enhancer-binding factor 3	ILF3	1	120.79	1	K	_LHVAVK(ac)VLQDMGLPTGAEGR_	460	6	Q12906_460	3	0.48527	0.9027	1.0018	0.901078	2	AKLHVAVKVLQDMGL	20190709_HepG2_LPS_SILAC_KacIP_CID_120min_AS_1st	25263
P83731	60S ribosomal protein L24	RPL24	1	79.697	1	K	_TAM(ox)AAAK(ac)APTK_	131	7	P83731_131	2	-0.74133	0.92252	1.0243	0.900635	1	KTAMAAAKAPTKAAP	200719_HepG2_LPS_Kac_15cm_ExSen_2hr_ooo	2357
A0A024R4M0	40S ribosomal protein S9	RPS9	1	87.216		K	_LQTQVFK(ac)LGLAK_	116	7	A0A024R4M0_116	2	0.66916	1.1319	1.2568	0.900621	4	RLQTQVFKLGLAKSI	20190617_HepG2_LPS_SILAC_KacIP_CID_120min_AS_2nd	21017
B4DK69	Aldo-keto reductase family 1 member C2	AKR1C2	1	122.52	1	K	_K(ac)LLDFCK_	175	1	B4DK69_175	2	-0.67838	0.88096	0.98144	0.89762	7	HPYFNQRKLLDFCKS	20190709_HepG2_LPS_SILAC_KacIP_CID_120min_AS_3rd	13220
Q9Y265	RuvB-like 1	RUVBL1	1	99.139	1	K	_M(ox)K(ac)IEEVK_	2	2	Q9Y265_2	2	0.1604	0.91707	1.02215	0.897201	1	MKIEEVKSTTKTQR	200719_HepG2_LPS_Kac_15cm_ExSen_2hr_ooo	3350
P38646	Stress-70 protein, mitochondrial	HSPA9	1	199.33	1	K	_ETGVDLTK(ac)DNM(ox)ALQR_	300	8	P38646_300	2	-0.070736	0.91113	1.01573	0.89702	3	ETGVDLTKDNMALQR	20190709_HepG2_LPS_SILAC_KacIP_CID_120min_AS_1st	16641
P06744	Glucose-6-phosphate isomerase	GPI	1	122.5	1	K	_DPSAVAK(ac)HFVALSTNTTK_	241	7	P06744_241	3	0.63917	0.85104	0.94986	0.895964	6	KDPSAVAKHFVALST	20190613_HepG2_LPS_SILAC_KacIP_CID_120min_AS_2nd-2	17688
P04040	Catalase	CAT	1	83.862	1	K	_DAQIFIQK(ac)K_	476	8	P04040_476	2	-0.41311	0.85842	0.95861	0.895484	3	DAQIFIQKKAVKNFT	200719_HepG2_LPS_Kac_15cm_ExSen_2hr_ooo	8872
P47914	60S ribosomal protein L29	RPL29	1	103.91	1	K	_RTQAPTK(ac)ASE_	156	7	P47914_156	2	0.17681	0.67448	0.753215	0.895468	1	KRTQAPTKASE	200719_HepG2_LPS_Kac_15cm_ExSen_2hr_ooo	2381
B4DJV2	Citrate synthase	CS	1	77.662	1	K	_LPCVAAK(ac)IYR_	202	7	B4DJV2_202	2	0.82919	0.86579	0.966915	0.895415	1	KLPCVAAKIYRNLYR	20190617_HepG2_LPS_SILAC_KacIP_CID_120min_AS_2nd	16813
A0A1X7SBS1	Heterogeneous nuclear ribonucleoprotein U	HNRNPU	1	80.014	1	K	_DLPEHAVLK(ac)M(ox)K_	554	9	A0A1X7SBS1_554	2	1.1271	0.89806	1.003	0.895374	5	LPEHAVLKMKGNFTL	20200603_LPS_SILAC_Kac_IP_Combine_120min	4008
P42704	Leucine-rich PPR motif-containing protein, mitochondrial	LRPPRC	1	66.004	1	K	_SYVSEK(ac)DVTSAK_	1332	6	P42704_1332	2	-0.052035	0.96766	1.0812	0.894987	1	MKSYVSEKDVTSAKA	200719_HepG2_LPS_Kac_15cm_ExSen_2hr_ooo	5907
F8VXL2	Dynein light chain	DYNLL1	1	106.5	1	K	_AVIK(ac)NADMSEEMQQDSVECATQALEK_	9	4	F8VXL2_9	3	0.29087	0.86391	0.96554	0.894743	4	CDRKAVIKNADMSEE	20190709_HepG2_LPS_SILAC_KacIP_CID_120min_AS_1st	25370
P21796	Voltage-dependent anion-selective channel protein 1	VDAC1	1	103.13	1	K	_NVNAGGHK(ac)LGLGLEFQA_	274	8	P21796_274	2	-0.014342	1.0008	1.1201	0.893492	1	NVNAGGHKLGLGLEF	20190613_HepG2_LPS_SILAC_KacIP_CID_120min_AS_2nd-1	20490
P62906	60S ribosomal protein L10a	RPL10A	1	55.335	1	K	_AVDIPHMDIEALK(ac)K_	91	13	P62906_91	3	-1.274	0.90699	1.01535	0.893278	1	HMDIEALKKLNKNKK	20190617_HepG2_LPS_SILAC_KacIP_CID_120min_AS_1st	22986
P53007	Tricarboxylate transport protein, mitochondrial	SLC25A1	1	147.75	1	K	_GLSSLLYGSIPK(ac)AAVR_	97	12	P53007_97	2	-0.2093	0.89337	1.00026	0.893138	6	LLYGSIPKAAVRFGM	20190709_HepG2_LPS_SILAC_KacIP_CID_120min_AS_1st	26186
P00505	Aspartate aminotransferase, mitochondrial	GOT2	1	71.153	1	K	_EFSIYM(ox)TK(ac)DGR_	404	8	P00505_404	2	0.27036	0.94159	1.05453	0.8929	1	EFSIYMTKDGRISVA	200719_HepG2_LPS_Kac_15cm_ExSen_2hr_ooo	9547
P07237	Protein disulfide-isomerase	P4HB	1	118.52	1	K	_LSNFK(ac)TAAESFK_	276	5	P07237_276	2	0.47899	0.87821	0.983695	0.892767	3	DGKLSNFKTAAESFK	20190613_HepG2_LPS_SILAC_KacIP_CID_120min_AS_2nd-2	13973
Q9P2D1	Chromodomain-helicase-DNA-binding protein 7	CHD7	1	89.358	1	K	_GVEVGADTGSK(ac)SISEK_	2230	11	Q9P2D1_2230	2	-0.32819	0.75972	0.85215	0.891533	1	VGADTGSKSISEKGS	200719_HepG2_LPS_Kac_15cm_ExSen_2hr_ooo	6512
Q92793	CREB-binding protein	CREBBP	1	271.58	1	K	_TETQAEDTEPDPGESK(ac)GEPR_	1014	16	Q92793_1014	2	1.1892	0.84076	0.94392	0.890711	1	EPDPGESKGEPRSEM	20190617_HepG2_LPS_SILAC_KacIP_CID_120min_AS_1st	6245
P27695	DNA-	APEX1	1	49.537	1	K	_GAVAEDGDELRTEPEAK(ac)K_	24	17	P27695_24	3	0.24024	0.83058	0.93268	0.890531	1	LRTEPEAKKSKTAAK	200719_HepG2_LPS_Kac_15cm_ExSen_2hr_ooo	5745
P62937	Peptidyl-prolyl cis-trans isomerase A	PPIA	1	63.624	1	K	_GFGYK(ac)GSCFHR_	49	5	P62937_49	3	0.43786	0.81097	0.911095	0.890105	1	GEKGFGYKGSCFHRI	20190709_HepG2_LPS_SILAC_KacIP_CID_120min_AS_1st	9442
P62851	40S ribosomal protein S25	RPS25	1	121.18	1	K	_AALQELLSK(ac)GLIK_	94	9	P62851_94	2	-1.2034	0.91479	1.02785	0.890003	4	ALQELLSKGLIKLVS	20190709_HepG2_LPS_SILAC_KacIP_CID_120min_AS_1st	28373
P68104	Elongation factor 1-alpha 1	EEF1A1	1	158.65	1	K	_TIEK(ac)FEK_	41	4	P68104_41	2	1.4149	0.97649	1.0973	0.889902	10	IDKRTIEKFEKEAAE	20190709_HepG2_LPS_SILAC_KacIP_CID_120min_AS_2nd	14800
P19338	Nucleolin	NCL	1	125.31	1	K	_AAK(ac)VVPVK_	223	3	P19338_223	2	0.93159	0.90503	1.01775	0.889246	5	AKGKKAAKVVPVKAK	20190709_HepG2_LPS_SILAC_KacIP_CID_120min_AS_3rd	4355
P61604	10 kDa heat shock protein, mitochondrial	HSPE1	1	69.672	1	K	_DGDILGK(ac)YVD_	99	7	P61604_99	2	0.89714	0.93676	1.05356	0.889142	5	RDGDILGKYVD	20200603_LPS_SILAC_Kac_IP_Combine_120min	7868
F8WCJ1	Eukaryotic translation initiation factor 5A	EIF5A2	1	99.711	1	K	_K(ac)YEDICPSTHNMDVPNIK_	68	1	F8WCJ1_68	3	1.0193	0.89942	1.0118	0.888931	2	IDIFTGKKYEDICPS	20190613_HepG2_LPS_SILAC_KacIP_CID_120min_AS_2nd-1	14566
A8MW49	Fatty acid-binding protein 1	FABP1	1	82.287	1	K	_LVTTFK(ac)NIK_	96	6	A8MW49_96	2	1.0473	0.91304	1.0273	0.888776	8	NKLVTTFKNIKSVTE	20190709_HepG2_LPS_SILAC_KacIP_CID_120min_AS_3rd	22800
P51659	Peroxisomal multifunctional enzyme type 2	HSD17B4	1	210.91	1	K	_GGNIGAK(ac)WTIDLK_	663	7	P51659_663	2	1.3809	0.76818	0.86474	0.888336	10	KGGNIGAKWTIDLKS	20190709_HepG2_LPS_SILAC_KacIP_CID_120min_AS_1st	21363
Q99879	Histone H2B type 1-M	H2BC14	1	180.87	2	K	_K(ac)AINK(ac)AQK_	17	1	Q99879_17	2	0.39135	1.1083	1.2477	0.888274	14	GSKKAINKAQKKDGK	20200603_LPS_SILAC_Kac_IP_Combine_120min	846
O94925	Glutaminase kidney isoform, mitochondrial	GLS	1	85.813	1	K	_FITALK(ac)STGLR_	164	6	O94925_164	2	-0.55403	1.0223	1.15105	0.888146	1	HKFITALKSTGLRTS	200719_HepG2_LPS_Kac_15cm_ExSen_2hr_ooo	11475
P18669	Phosphoglycerate mutase 1	PGAM1	1	122.16	1	K	_FSGWYDADLSPAGHEEAK(ac)R_	39	18	P18669_39	3	0.49554	0.8848	0.996845	0.8876	8	PAGHEEAKRGGQALR	20190709_HepG2_LPS_SILAC_KacIP_CID_120min_AS_2nd	16249
P60174	Triosephosphate isomerase	TPI1	1	71.143	1	K	_IAVAAQNCYK(ac)VTNGAFTGEISPGM(ox)IK_	106	10	P60174_106	3	-0.12607	0.81844	0.923275	0.886453	1	RRHVFGESDELIGQK	20190709_HepG2_LPS_SILAC_KacIP_CID_120min_AS_1st	25270
P06748	Nucleophosmin	NPM1	1	161.17	1	K	_SIRDTPAK(ac)NAQK_	202	8	P06748_202	3	-1.3973	0.88498	0.998465	0.886341	6	SIRDTPAKNAQKSNQ	20200603_LPS_SILAC_Kac_IP_Combine_120min	331
B4DK69	Aldo-keto reductase family 1 member C2	AKR1C2	1	77.324	1	K	_YK(ac)PVCNQVECHPYFNQR_	159	2	B4DK69_159	3	-0.41704	0.86973	0.98144	0.886177	10	NKPGLKYKPVCNQVE	200719_HepG2_LPS_Kac_15cm_ExSen_2hr_ooo	8368
P30086	Phosphatidylethanolamine-binding protein 1	PEBP1	1	103.84	1	K	_VLTPTQVK(ac)NRPTSISWDGLDSGK_	47	8	P30086_47	3	-0.070753	0.71542	0.80763	0.885826	10	VLTPTQVKNRPTSIS	20200603_LPS_SILAC_Kac_IP_Combine_120min	6814
P55084	Trifunctional enzyme subunit beta, mitochondrial	HADHB	1	228.68	1	K	_TPFLLSGTSYK(ac)DLM(ox)PHDLAR_	72	11	P55084_72	3	0.52675	0.82356	0.929725	0.88581	20	LLSGTSYKDLMPHDL	20200603_LPS_SILAC_Kac_IP_Combine_120min	10006
F8W6I7	Helix-destabilizing protein	HNRNPA1	1	98.421	1	K	_IVIQK(ac)YHTVNGHNCEVR_	166	5	F8W6I7_166	3	0.07658	1.2133	1.3714	0.884716	4	VDKIVIQKYHTVNGH	20190613_HepG2_LPS_SILAC_KacIP_CID_120min_AS_2nd-1	6739
B4DJV2	Citrate synthase	CS	1	53.136	1	K	_EFALK(ac)HLPNDPMFK_	353	5	B4DJV2_353	3	-0.93712	0.85503	0.966915	0.884287	1	CQREFALKHLPNDPM	20190613_HepG2_LPS_SILAC_KacIP_CID_120min_AS_2nd-1	20409
P26641	Elongation factor 1-gamma	EEF1G	1	189.7	1	K	_AFNQGK(ac)IFK_	434	6	P26641_434	2	-1.2809	0.88625	1.00516	0.881705	11	GKAFNQGKIFK	20200603_LPS_SILAC_Kac_IP_Combine_120min	3382
P62826	GTP-binding nuclear protein Ran	RAN	1	70.942	1	K	_VTYK(ac)NVPNWHR_	99	4	P62826_99	3	0.34355	0.9347	1.06117	0.880816	9	VTSRVTYKNVPNWHR	200719_HepG2_LPS_Kac_15cm_ExSen_2hr_ooo	7560
Q15365	Poly	PCBP1	1	121.24	1	K	_LLMHGK(ac)EVGSIIGK_	23	6	Q15365_23	3	-2.7388	0.78729	0.8947	0.879949	5	IRLLMHGKEVGSIIG	20190709_HepG2_LPS_SILAC_KacIP_CID_120min_AS_1st	15475
P19338	Nucleolin	NCL	1	103.55	1	K	_ALVATPGK(ac)K_	124	8	P19338_124	2	-0.048413	0.89353	1.01775	0.877946	4	ALVATPGKKGAAIPA	20190709_HepG2_LPS_SILAC_KacIP_CID_120min_AS_1st	5820
P50454	Serpin H1	SERPINH1	1	111.99	1	K	_GVVEVTHDLQK(ac)HLAGLGLTEAIDKNK_	319	11	P50454_319	4	-0.39208	0.94664	1.07925	0.877128	9	EVTHDLQKHLAGLGL	20190709_HepG2_LPS_SILAC_KacIP_CID_120min_AS_2nd	25980
P36578	60S ribosomal protein L4	RPL4	1	110.31	1	K	_LNILK(ac)LAPGGHVGR_	239	5	P36578_239	3	-1.2937	0.94004	1.0722	0.876739	4	VSKLNILKLAPGGHV	20190613_HepG2_LPS_SILAC_KacIP_CID_120min_AS_2nd-1	17033
Q29RF7	Sister chromatid cohesion protein PDS5 homolog A	PDS5A	1	70.889	1	K	_IISVTPVK(ac)NIDPVK_	1211	8	Q29RF7_1211	2	0.69142	0.78826	0.89948	0.876351	1	IISVTPVKNIDPVKN	200719_HepG2_LPS_Kac_15cm_ExSen_2hr_ooo	12859
C9JG87	39S ribosomal protein L39, mitochondrial	MRPL39	1	167.92	1	K	_HVGK(ac)TDPGTVFVM(ox)NK_	72	4	C9JG87_72	2	-0.93754	0.85657	0.97772	0.876089	1	IEVKHVGKTDPGTVF	20190709_HepG2_LPS_SILAC_KacIP_CID_120min_AS_1st	12616
P46060	Ran GTPase-activating protein 1	RANGAP1	1	78.401	1	K	_TQVAGGQLSFK(ac)GK_	26	11	P46060_26	2	-0.36317	0.84	0.959195	0.875734	1	AGGQLSFKGKSLKLN	200719_HepG2_LPS_Kac_15cm_ExSen_2hr_ooo	7780
P00367	Glutamate dehydrogenase 1, mitochondrial	GLUD1	1	275.19	1	K	_GASIVEDK(ac)LVEDLRTR_	84	8	P00367_84	3	0.19692	0.83853	0.95784	0.875438	21	GASIVEDKLVEDLRT	20200603_LPS_SILAC_Kac_IP_Combine_120min	8496
Q15843	NEDD8	NEDD8	1	178.84	1	K	_LIYSGK(ac)QM(ox)NDEK_	48	6	Q15843_48	2	0.65175	0.77415	0.88489	0.874855	11	QRLIYSGKQMNDEKT	20200603_LPS_SILAC_Kac_IP_Combine_120min	1846
P17987	T-complex protein 1 subunit alpha	TCP1	1	155.33	1	K	_SLHDALCVVK(ac)R_	400	10	P17987_400	2	0.27213	0.89469	1.02305	0.874532	21	HDALCVVKRVLESKS	20200603_LPS_SILAC_Kac_IP_Combine_120min	3891
Q6IA86	Elongator complex protein 2	ELP2	1	272.96	1	K	_LK(ac)ENTFTIENESVK_	256	2	Q6IA86_256	2	-0.79605	0.67388	0.77079	0.874272	9	DDDNIRLKENTFTIE	20190709_HepG2_LPS_SILAC_KacIP_CID_120min_AS_1st	14789
B5MCW3	Bromodomain-containing protein 8	BRD8	0.999892	41.912	1	K	_DKPVPLPAPEM(ox)TVK(ac)QER_	481	14	B5MCW3_481	3	-0.43654	0.90595	1.0365	0.874047	1	PAPEMTVKQERLDFE	200719_HepG2_LPS_Kac_15cm_ExSen_2hr_ooo	8371
P06733	Alpha-enolase	ENO1	1	167.04	1	K	_YGK(ac)DATNVGDEGGFAPNILENKEGLELLK_	202	3	P06733_202	3	0.078578	0.76728	0.8785	0.873398	5	VIKEKYGKDATNVGD	20190709_HepG2_LPS_SILAC_KacIP_CID_120min_AS_1st	28441
P51659	Peroxisomal multifunctional enzyme type 2	HSD17B4	1	181.86	1	K	_AVANYDSVEEGEK(ac)VVK_	81	13	P51659_81	2	0.36281	0.75514	0.86474	0.873257	5	DSVEEGEKVVKTALD	20190709_HepG2_LPS_SILAC_KacIP_CID_120min_AS_2nd	12598
P07900	Heat shock protein HSP 90-alpha	HSP90AA1	1	68.846	1	K	_GTK(ac)VILHLK_	185	3	P07900_185	3	0.84939	0.92242	1.0581	0.87177	1	EPMGRGTKVILHLKE	20190613_HepG2_LPS_SILAC_KacIP_CID_120min_AS_2nd-1	7523
P34897	Serine hydroxymethyltransferase, mitochondrial	SHMT2	1	105.52	1	K	_YSEGYPGK(ac)R_	103	8	P34897_103	2	0.20939	0.94516	1.0846	0.871436	1	YSEGYPGKRYYGGAE	200719_HepG2_LPS_Kac_15cm_ExSen_2hr_ooo	4048
E7EQR4	Ezrin	EZR	1	71.03	1	K	_LQDYEEK(ac)TK_	357	7	E7EQR4_357	2	0.082134	0.86514	0.99356	0.870748	1	RLQDYEEKTKKAERE	200719_HepG2_LPS_Kac_15cm_ExSen_2hr_ooo	4262
Q14978	Nucleolar and coiled-body phosphoprotein 1	NOLC1	1	72.321	1	K	_VAGGAAPSK(ac)PASAK_	505	9	Q14978_505	2	-0.0056308	0.85048	0.97724	0.870288	1	AGGAAPSKPASAKKG	200719_HepG2_LPS_Kac_15cm_ExSen_2hr_ooo	3264
P18669	Phosphoglycerate mutase 1	PGAM1	1	174.35	1	K	_HYGGLTGLNK(ac)AETAAK_	100	10	P18669_100	2	0.53564	0.86638	0.996845	0.869122	15	GGLTGLNKAETAAKH	20190709_HepG2_LPS_SILAC_KacIP_CID_120min_AS_1st	10893
P40227	T-complex protein 1 subunit zeta	CCT6A	1	120.03	1	K	_HK(ac)SETDTSLIR_	199	2	P40227_199	2	-0.61975	0.89559	1.03105	0.868619	4	EIMEMKHKSETDTSL	20190709_HepG2_LPS_SILAC_KacIP_CID_120min_AS_1st	5390
P62807	Histone H2B type 1-C/E/F/G/I	H2BC4	1	133.04	2	K	_PEPAK(ac)SAPAPK(ac)K_	6	5	P62807_6	2	-1.1634	1.0834	1.2477	0.868318	5	MPEPAKSAPAPKK	20190617_HepG2_LPS_SILAC_KacIP_CID_120min_AS_1st	4686
P22307	Non-specific lipid-transfer protein	SCP2	1	152.38	1	K	_LK(ac)ITGNM(ox)GLAM(ox)K_	524	2	P22307_524	2	-1.1345	0.8408	0.968475	0.868169	7	AFFQGKLKITGNMGL	20190709_HepG2_LPS_SILAC_KacIP_CID_120min_AS_1st	18102
C9J8P9	Clathrin light chain	CLTA	1	125.82	1	K	_SVLISLK(ac)QAPLVH_	190	7	C9J8P9_190	2	0.52874	0.83962	0.96757	0.867762	1	RSVLISLKQAPLVH	20200603_LPS_SILAC_Kac_IP_Combine_120min	8110
Q9NUB1	Acetyl-coenzyme A synthetase 2-like, mitochondrial	ACSS1	1	117.25	1	K	_LLLK(ac)YGDAWVK_	396	4	Q9NUB1_396	2	-1.2649	0.74473	0.858685	0.867291	3	TAVRLLLKYGDAWVK	20190617_HepG2_LPS_SILAC_KacIP_CID_120min_AS_1st	23990
Q9Y2S6	Translation machinery-associated protein 7	TMA7	1	64.374	1	K	_EM(ox)DEEDK(ac)AFK_	27	7	Q9Y2S6_27	2	0.45691	0.87393	1.0077	0.867252	1	KEMDEEDKAFKQKQK	200719_HepG2_LPS_Kac_15cm_ExSen_2hr_ooo	4949
P38646	Stress-70 protein, mitochondrial	HSPA9	1	178.23	1	K	_M(ox)PK(ac)VQQTVQDLFGR_	394	3	P38646_394	2	0.050474	0.87936	1.01573	0.865742	7	GGMTRMPKVQQTVQD	20190709_HepG2_LPS_SILAC_KacIP_CID_120min_AS_2nd	25617
Q06203	Amidophosphoribosyltransferase	PPAT	1	103.9	1	K	_GQESAGIVTSDGSSVPTFK(ac)SHK_	62	19	Q06203_62	3	-0.26176	0.94073	1.08683	0.865568	3	GSSVPTFKSHKGMGL	20190709_HepG2_LPS_SILAC_KacIP_CID_120min_AS_1st	13670
A0A0C4DGA2	Enoyl-CoA delta isomerase 2, mitochondrial	ECI2	1	189.07	1	K	_K(ac)LTAGEACAQGLVTEVFPDSTFQKEVWTR_	275	1	A0A0C4DGA2_275	3	0.063339	0.85998	0.99368	0.86545	10	EMLIFGKKLTAGEAC	20190709_HepG2_LPS_SILAC_KacIP_CID_120min_AS_2nd	27864
Q562R1	Beta-actin-like protein 2	ACTBL2	1	135.86	1	K	_IK(ac)IIAPPERK_	329	2	Q562R1_329	3	-0.2413	0.73575	0.85086	0.864713	15	APSTMKIKIIAPPER	20190617_HepG2_LPS_SILAC_KacIP_CID_120min_AS_1st	11756
A0A0C4DGA2	Enoyl-CoA delta isomerase 2, mitochondrial	ECI2	1	172.91	1	K	_EREK(ac)LHAVNAEECNVLQGR_	329	4	A0A0C4DGA2_329	3	0.91733	0.85908	0.99368	0.864544	12	IRKREREKLHAVNAE	200719_HepG2_LPS_Kac_15cm_ExSen_2hr_ooo	8718
P04843	Dolichyl-diphosphooligosaccharide--protein glycosyltransferase subunit 1	RPN1	1	160.22	1	K	_LK(ac)TEGSDLCDR_	538	2	P04843_538	2	-0.54455	0.8985	1.03935	0.864483	9	ALLQSRLKTEGSDLC	20200603_LPS_SILAC_Kac_IP_Combine_120min	1856
P09622	Dihydrolipoyl dehydrogenase, mitochondrial	DLD	1	138.63	1	K	_VGK(ac)FPFAANSR_	420	3	P09622_420	2	-0.3033	0.83955	0.97184	0.863877	6	GIEYKVGKFPFAANS	200719_HepG2_LPS_Kac_15cm_ExSen_2hr_ooo	10227
H0Y612	E3 ubiquitin-protein ligase TRIM33	TRIM33	1	78.69	1	K	_QSGLSSLVNGK(ac)SPIR_	622	11	H0Y612_622	2	0.13912	0.58234	0.67418	0.863775	1	LSSLVNGKSPIRSLM	200719_HepG2_LPS_Kac_15cm_ExSen_2hr_ooo	11934
P09622	Dihydrolipoyl dehydrogenase, mitochondrial	DLD	1	102.69	1	K	_NQVTATK(ac)ADGGTQVIDTK_	166	7	P09622_166	2	0.19796	0.83923	0.97184	0.863547	3	KNQVTATKADGGTQV	200719_HepG2_LPS_Kac_15cm_ExSen_2hr_ooo	7197
Q9UII2	ATPase inhibitor, mitochondrial	ATP5IF1	1	120.63	1	K	_HHEEEIVHHK(ac)K_	82	10	Q9UII2_82	3	-0.94047	0.71094	0.82344	0.863378	2	EEEIVHHKKEIERLQ	20190613_HepG2_LPS_SILAC_KacIP_CID_120min_AS_2nd-1	451
E9PP50	Cofilin, non-muscle isoform	CFL1	1	76.064	1	K	_M(ox)LPDK(ac)DCR_	78	5	E9PP50_78	2	-0.23717	0.87215	1.0103	0.863258	1	FVKMLPDKDCRYALY	200719_HepG2_LPS_Kac_15cm_ExSen_2hr_ooo	3794
P19338	Nucleolin	NCL	1	99.442	1	K	_AVTTPGK(ac)K_	109	7	P19338_109	2	0.47812	0.87856	1.01775	0.863238	2	KAVTTPGKKGATPGK	200719_HepG2_LPS_Kac_15cm_ExSen_2hr_ooo	2382
P49458	Signal recognition particle 9 kDa protein	SRP9	1	192.72	1	K	_VTDDLVCLVYK(ac)TDQAQDVK_	52	11	P49458_52	3	0.71427	0.84617	0.980245	0.863223	15	DLVCLVYKTDQAQDV	20190617_HepG2_LPS_SILAC_KacIP_CID_120min_AS_1st	27932
Q14978	Nucleolar and coiled-body phosphoprotein 1	NOLC1	1	118.73	1	K	_ATAK(ac)AALSLPAK_	452	4	Q14978_452	2	2.4432	0.84311	0.97724	0.862746	3	TKPKATAKAALSLPA	20200603_LPS_SILAC_Kac_IP_Combine_120min	3383
O75947	ATP synthase subunit d, mitochondrial	ATP5PD	1	155.39	1	K	_K(ac)YPYWPHQPIENL_	149	1	O75947_149	2	0.73474	0.68761	0.79708	0.862661	3	ETKLDKKKYPYWPHQ	20190709_HepG2_LPS_SILAC_KacIP_CID_120min_AS_1st	23526
P78347	General transcription factor II-I	GTF2I	1	57.434	1	K	_EDLQLDK(ac)PASGVK_	450	7	P78347_450	2	-0.16769	0.73482	0.851925	0.862541	1	REDLQLDKPASGVKE	200719_HepG2_LPS_Kac_15cm_ExSen_2hr_ooo	8666
P34897	Serine hydroxymethyltransferase, mitochondrial	SHMT2	1	126.51	1	K	_IM(ox)GLDLPDGGHLTHGYM(ox)SDVK(ac)R_	181	21	P34897_181	3	-1.2989	0.93467	1.0846	0.861765	7	HGYMSDVKRISATSI	20200603_LPS_SILAC_Kac_IP_Combine_120min	5520
P40939	Trifunctional enzyme subunit alpha, mitochondrial	HADHA	1	95.073	1	K	_QFTPCQLLADHANSPNK(ac)K_	759	17	P40939_759	3	0.36616	0.84241	0.977645	0.861673	3	DHANSPNKKFYQ	20190709_HepG2_LPS_SILAC_KacIP_CID_120min_AS_2nd	14517
P62807	Histone H2B type 1-C/E/F/G/I	H2BC4	1	133.04	2	K	_SAPAPK(ac)K(ac)GSK_	12	6	P62807_12	2	0.27623	1.0733	1.2477	0.860223	7	AKSAPAPKKGSKKAV	20190617_HepG2_LPS_SILAC_KacIP_CID_120min_AS_1st	4686
P00367	Glutamate dehydrogenase 1, mitochondrial	GLUD1	1	107.69	1	K	_LTFK(ac)YER_	457	4	P00367_457	2	1.0514	0.82394	0.95784	0.860206	10	SYGRLTFKYERDSNY	20190613_HepG2_LPS_SILAC_KacIP_CID_120min_AS_2nd-2	8864
P06748	Nucleophosmin	NPM1	1	208.15	1	K	_VEAK(ac)FINYVK_	267	4	P06748_267	2	0.15982	0.85883	0.998465	0.86015	14	SLPKVEAKFINYVKN	20200603_LPS_SILAC_Kac_IP_Combine_120min	5259
D6RAT0	40S ribosomal protein S3a	RPS3A	1	166.6	1	K	_ATGDETGAK(ac)VER_	212	9	D6RAT0_212	2	1.2563	0.92661	1.0776	0.859883	3	TGDETGAKVERADGY	20200603_LPS_SILAC_Kac_IP_Combine_120min	1237
P68363	Tubulin alpha-1B chain	TUBA1B	1	145.23	1	K	_LDHK(ac)FDLM(ox)YAK_	394	4	P68363_394	3	0.77463	0.93395	1.08615	0.859872	7	AWARLDHKFDLMYAK	20190613_HepG2_LPS_SILAC_KacIP_CID_120min_AS_1st-1	14638
F8VQ14	CCT-beta	CCT2	1	61.409	1	K	_ILIANTGM(ox)DTDK(ac)IK_	248	12	F8VQ14_248	2	-0.046225	0.88783	1.0334	0.859135	1	NTGMDTDKIKIFGSR	200719_HepG2_LPS_Kac_15cm_ExSen_2hr_ooo	9354
P10809	60 kDa heat shock protein, mitochondrial	HSPD1	1	133.88	1	K	_EIGNIISDAM(ox)K(ac)K_	191	11	P10809_191	2	-0.36399	0.82008	0.954885	0.858826	6	NIISDAMKKVGRKGV	20190617_HepG2_LPS_SILAC_KacIP_CID_120min_AS_1st	20701
P19338	Nucleolin	NCL	1	99.136	1	K	_AAVTPGK(ac)K_	87	7	P19338_87	2	0.48728	0.87406	1.01775	0.858816	2	KAAVTPGKKAAATPA	20200603_LPS_SILAC_Kac_IP_Combine_120min	475
P14618	Pyruvate kinase PKM	PKM	1	103.21	1	K	_SVETLK(ac)EM(ox)IK_	62	6	P14618_62	2	0.61237	0.76736	0.893515	0.85881	4	SRSVETLKEMIKSGM	20190617_HepG2_LPS_SILAC_KacIP_CID_120min_AS_2nd	19896
P42330	Aldo-keto reductase family 1 member C3	AKR1C3	1	198.97	1	K	_QLEM(ox)ILNK(ac)PGLK_	179	8	P42330_179	2	0.41731	0.80314	0.93533	0.85867	10	QLEMILNKPGLKYKP	20190617_HepG2_LPS_SILAC_KacIP_CID_120min_AS_2nd	21643
P14618	Pyruvate kinase PKM	PKM	1	180.21	1	K	_TATESFASDPILYRPVAVALDTK(ac)GPEIR_	115	23	P14618_115	3	0.68703	0.76723	0.893515	0.858665	5	VAVALDTKGPEIRTG	20190709_HepG2_LPS_SILAC_KacIP_CID_120min_AS_1st	29760
P68363	Tubulin alpha-1B chain	TUBA1B	1	118.52	1	K	_DVNAAIATIK(ac)TK_	336	10	P68363_336	2	0.31917	0.9325	1.08615	0.858537	6	NAAIATIKTKRSIQF	20200603_LPS_SILAC_Kac_IP_Combine_120min	5396
O75822	Eukaryotic translation initiation factor 3 subunit J	EIF3J	1	79.875	1	K	_VLTPEEQLADK(ac)LR_	117	11	O75822_117	2	-0.037564	0.82736	0.96389	0.858355	1	PEEQLADKLRLKKLQ	200719_HepG2_LPS_Kac_15cm_ExSen_2hr_ooo	14389
H3BPG5	RNA-binding protein with serine-rich domain 1	RNPS1	1	173.87	1	K	_GYAYVEFENPDEAEK(ac)ALK_	41	15	H3BPG5_41	2	-0.51608	0.80822	0.94239	0.857628	5	ENPDEAEKALKHMDG	20190709_HepG2_LPS_SILAC_KacIP_CID_120min_AS_2nd	21488
O75874	Isocitrate dehydrogenase [NADP] cytoplasmic	IDH1	1	55.128	1	K	_ATDFVVPGPGK(ac)VEITYTPSDGTQK_	151	11	O75874_151	3	0.89711	0.90908	1.06015	0.857501	1	FVVPGPGKVEITYTP	20190617_HepG2_LPS_SILAC_KacIP_CID_120min_AS_1st	25942
P40925	Malate dehydrogenase, cytoplasmic	MDH1	1	102.53	1	K	_K(ac)LSSAM(ox)SAAK_	239	1	P40925_239	2	0.2721	0.8289	0.967535	0.856713	1	AAVIKARKLSSAMSA	200719_HepG2_LPS_Kac_15cm_ExSen_2hr_ooo	2314
P07900	Heat shock protein HSP 90-alpha	HSP90AA1	1	58.98	1	K	_K(ac)HSQFIGYPITLFVEK_	209	1	P07900_209	3	0.75135	0.90538	1.0581	0.855666	1	RIKEIVKKHSQFIGY	20190613_HepG2_LPS_SILAC_KacIP_CID_120min_AS_2nd-2	22652
O75891	Cytosolic 10-formyltetrahydrofolate dehydrogenase	ALDH1L1	1	58.864	1	K	_TDVAAPFGGFK(ac)QSGFGK_	876	11	O75891_876	2	-0.21508	0.75049	0.87817	0.854607	1	AAPFGGFKQSGFGKD	20190617_HepG2_LPS_SILAC_KacIP_CID_120min_AS_1st	23788
P06733	Alpha-enolase	ENO1	1	200.76	1	K	_IGAEVYHNLK(ac)NVIK_	193	10	P06733_193	2	0.004793	0.75058	0.8785	0.854388	21	AEVYHNLKNVIKEKY	20190613_HepG2_LPS_SILAC_KacIP_CID_120min_AS_2nd-1	17300
P51659	Peroxisomal multifunctional enzyme type 2	HSD17B4	1	115.92	1	K	_WTIDLK(ac)SGSGK_	669	6	P51659_669	2	0.056247	0.73804	0.86474	0.853482	9	AKWTIDLKSGSGKVY	200719_HepG2_LPS_Kac_15cm_ExSen_2hr_ooo	11172
Q15459	Splicing factor 3A subunit 1	SF3A1	1	115.12	1	K	_VMQQQQQTTQQQLPQK(ac)VQAQVIQETIVPK_	131	16	Q15459_131	3	-0.018611	0.76123	0.89204	0.853359	1	TQQQLPQKVQAQVIQ	20190709_HepG2_LPS_SILAC_KacIP_CID_120min_AS_1st	25044
Q15843	NEDD8	NEDD8	1	66.989	1	K	_QM(ox)NDEK(ac)TAADYK_	54	6	Q15843_54	2	0.40953	0.75491	0.88489	0.853112	1	GKQMNDEKTAADYKI	200719_HepG2_LPS_Kac_15cm_ExSen_2hr_ooo	3513
O60264	SWI/SNF-related matrix-associated actin-dependent regulator of chromatin subfamily A member 5	SMARCA5	1	175.6	1	K	_DIDILNSAGK(ac)M(ox)DK_	440	10	O60264_440	2	-0.073428	0.86231	1.01145	0.852548	3	DILNSAGKMDKMRLL	20190709_HepG2_LPS_SILAC_KacIP_CID_120min_AS_1st	20213
Q13011	Delta	ECH1	1	82.59	1	K	_K(ac)M(ox)M(ox)ADEALGSGLVSR_	231	1	Q13011_231	2	-0.99387	0.93229	1.09355	0.852535	1	ELAFTARKMMADEAL	200719_HepG2_LPS_Kac_15cm_ExSen_2hr_ooo	8615
F5H7R9	Parathymosin	PTMS	1	258.39	1	K	_SVEAAAELSAK(ac)DLK_	15	11	F5H7R9_15	2	-1.0243	0.74727	0.87658	0.852484	16	AAAELSAKDLKEKKE	20190709_HepG2_LPS_SILAC_KacIP_CID_120min_AS_1st	15671
A0A0U1RQF0	3-hydroxyacyl-[acyl-carrier-protein] dehydratase	FASN	1	85.006	1	K	_GLKPSCTIIPLM(ox)K(ac)K_	786	13	A0A0U1RQF0_786	2	-0.012687	0.86837	1.0197	0.851594	9	CTIIPLMKKDHRDNL	20200603_LPS_SILAC_Kac_IP_Combine_120min	4371
P06744	Glucose-6-phosphate isomerase	GPI	1	161.82	1	K	_ELQAAGK(ac)SPEDLER_	454	7	P06744_454	2	0.37692	0.80877	0.94986	0.851462	2	KELQAAGKSPEDLER	20190709_HepG2_LPS_SILAC_KacIP_CID_120min_AS_1st	11894
P51649	Succinate-semialdehyde dehydrogenase, mitochondrial	ALDH5A1	1	66.674	1	K	_K(ac)WYNLMIQNKDDLAR_	126	1	P51649_126	3	0.18563	0.80319	0.9437	0.851107	2	ERSSLLRKWYNLMIQ	20190709_HepG2_LPS_SILAC_KacIP_CID_120min_AS_1st	21271
P00558	Phosphoglycerate kinase 1	PGK1	1	120.11	1	K	_ASLSK(ac)LGDVYVNDAFGTAHR_	156	5	P00558_156	3	-0.084518	0.81686	0.960415	0.850528	6	AFRASLSKLGDVYVN	20200603_LPS_SILAC_Kac_IP_Combine_120min	7785
P00367	Glutamate dehydrogenase 1, mitochondrial	GLUD1	1	110.6	1	K	_FGK(ac)HGGTIPIVPTAEFQDR_	480	3	P00367_480	3	-1.0761	0.81409	0.95784	0.849923	15	SLERKFGKHGGTIPI	20200603_LPS_SILAC_Kac_IP_Combine_120min	6517
B4DK69	Aldo-keto reductase family 1 member C2	AKR1C2	1	160.53	1	K	_(ac)M(ox)DSK(ac)YQCVK_	4	4	B4DK69_4	2	-0.55749	0.83414	0.98144	0.849914	10	MDSKYQCVKLN	20200603_LPS_SILAC_Kac_IP_Combine_120min	2325
P62851	40S ribosomal protein S25	RPS25	1	111.12	1	K	_DK(ac)LNNLVLFDK_	43	2	P62851_43	2	0.96445	0.87208	1.02785	0.848451	2	SKGKVRDKLNNLVLF	20200603_LPS_SILAC_Kac_IP_Combine_120min	8366
Q9Y5B9	FACT complex subunit SPT16	SUPT16H	1	57.175	1	K	_DLYIRPNIAQK(ac)R_	674	11	Q9Y5B9_674	3	-0.20271	0.61594	0.72598	0.848426	1	IRPNIAQKRMQGSLE	200719_HepG2_LPS_Kac_15cm_ExSen_2hr_ooo	9239
O60701	UDP-glucose 6-dehydrogenase	UGDH	1	51.235	1	K	_YLMDEGAHLHIYDPK(ac)VPR_	370	15	O60701_370	4	-0.078535	0.86453	1.01913	0.848302	4	HLHIYDPKVPREQIV	20190709_HepG2_LPS_SILAC_KacIP_CID_120min_AS_1st	19540
P07108	Acyl-CoA-binding protein	DBI	1	182.37	1	K	_TK(ac)PSDEEM(ox)LFIYGHYK_	19	2	P07108_19	3	-0.06199	0.88303	1.04124	0.848056	20	EVRHLKTKPSDEEML	20200603_LPS_SILAC_Kac_IP_Combine_120min	7274
P51659	Peroxisomal multifunctional enzyme type 2	HSD17B4	1	190.19	1	K	_FAK(ac)PVYPGQTLQTEM(ox)WK_	565	3	P51659_565	3	-0.83048	0.73313	0.86474	0.847804	31	AIKARFAKPVYPGQT	20200603_LPS_SILAC_Kac_IP_Combine_120min	7217
P08238	Heat shock protein HSP 90-beta	HSP90AB1	0.862021	67.685	1	K	_IEDVGSDEEDDSGK(ac)DKK_	263	14	P08238_263	3	0.35266	0.83299	0.9839	0.846621	1	DEEDDSGKDKKKKTK	200719_HepG2_LPS_Kac_15cm_ExSen_2hr_ooo	3453
P05141	ADP/ATP translocase 2	SLC25A5	1	155.88	1	K	_VK(ac)LLLQVQHASK_	33	2	P05141_33	3	-0.21276	0.9015	1.065	0.846479	11	VAPIERVKLLLQVQH	20190613_HepG2_LPS_SILAC_KacIP_CID_120min_AS_1st-1	10328
Q7RTV0	PHD finger-like domain-containing protein 5A	PHF5A	1	155.99	1	K	_(ac)AK(ac)HHPDLIFCRK_	3	2	Q7RTV0_3	3	0.99646	0.91043	1.0759	0.846203	23	MAKHHPDLIF	20190709_HepG2_LPS_SILAC_KacIP_CID_120min_AS_1st	9038
P04406	Glyceraldehyde-3-phosphate dehydrogenase	GAPDH	1	89.231	1	K	_AVGK(ac)VIPELNGK_	219	4	P04406_219	2	0.65868	0.83593	0.98917	0.845082	9	GAAKAVGKVIPELNG	20200603_LPS_SILAC_Kac_IP_Combine_120min	4489
A0A087WV57	Protein kinase C-binding protein 1	ZMYND8	1	66.056	1	K	_LK(ac)GFPFWPAK_	261	2	A0A087WV57_261	2	-0.43487	0.83281	0.98726	0.843557	1	PLVWAKLKGFPFWPA	20200603_LPS_SILAC_Kac_IP_Combine_120min	8911
Q5QNW6	Histone H2B type 2-F	H2BC18	1	204.79	2	K	_K(ac)AVTK(ac)VQK_	17	1	Q5QNW6_17	2	-0.79308	1.0522	1.2477	0.843312	20	APKKGSKKAVTKVQK	20190613_HepG2_LPS_SILAC_KacIP_CID_120min_AS_2nd-1	3418
P23527	Histone H2B type 1-O	H2BC17	1	223.84	2	K	_K(ac)AVTK(ac)AQK_	17	1	P23527_17	2	-0.85535	1.0842	1.2863	0.842883	20	APKKGSKKAVTKAQK	20200603_LPS_SILAC_Kac_IP_Combine_120min	573
P11413	Glucose-6-phosphate 1-dehydrogenase	G6PD	1	81.625	1	K	_GPTEADELM(ox)K(ac)R_	497	10	P11413_497	2	1.1428	0.88173	1.0466	0.842471	1	TEADELMKRVGFQYE	200719_HepG2_LPS_Kac_15cm_ExSen_2hr_ooo	5327
Q15067	Peroxisomal acyl-coenzyme A oxidase 1	ACOX1	1	154.24	1	K	_NLQK(ac)EVIHR_	504	4	Q15067_504	2	-2.4332	0.87479	1.03896	0.841982	18	IAAKNLQKEVIHRKS	20200603_LPS_SILAC_Kac_IP_Combine_120min	1740
Q9H1E3	Nuclear ubiquitous casein and cyclin-dependent kinase substrate 1	NUCKS1	1	118.05	1	K	_VVDYSQFQESDDADEDYGRDSGPPTK(ac)K_	35	26	Q9H1E3_35	3	0.70744	0.77258	0.918235	0.841375	3	RDSGPPTKKIRSSPR	20190709_HepG2_LPS_SILAC_KacIP_CID_120min_AS_3rd	15173
P62851	40S ribosomal protein S25	RPS25	1	86.488	1	K	_DKLNNLVLFDK(ac)ATYDK_	52	11	P62851_52	3	0.39704	0.86407	1.02785	0.840658	1	NNLVLFDKATYDKLC	200719_HepG2_LPS_Kac_15cm_ExSen_2hr_ooo	14335
P19338	Nucleolin	NCL	1	59.227	1	K	_NLPYK(ac)VTQDELK_	403	5	P19338_403	2	-0.32512	0.85529	1.01775	0.840373	2	LAKNLPYKVTQDELK	200719_HepG2_LPS_Kac_15cm_ExSen_2hr_ooo	10610
P08133	Annexin A6	ANXA6	1	83.404	1	K	_GTVRPANDFNPDADAK(ac)ALR_	370	16	P08133_370	3	0.21598	0.93921	1.11805	0.840043	2	FNPDADAKALRKAMK	20200603_LPS_SILAC_Kac_IP_Combine_120min	4230
P60174	Triosephosphate isomerase	TPI1	1	129.29	1	K	_VVLAYEPVWAIGTGK(ac)TATPQQAQEVHEK_	212	15	P60174_212	4	-1.8474	0.77545	0.923275	0.839891	3	TRIIYGGSVTGATCK	20190709_HepG2_LPS_SILAC_KacIP_CID_120min_AS_3rd	23086
P62424	60S ribosomal protein L7a	RPL7A	1	70.028	1	K	_VAPAPAVVK(ac)K_	20	9	P62424_20	2	0.43546	0.90535	1.0783	0.839609	1	APAPAVVKKQEAKKV	200719_HepG2_LPS_Kac_15cm_ExSen_2hr_ooo	4583
Q13564	NEDD8-activating enzyme E1 regulatory subunit	NAE1	1	62.582	1	K	_YIK(ac)LQNVYR_	341	3	Q13564_341	2	-0.19292	0.77851	0.92761	0.839264	1	ADSGKYIKLQNVYRE	200719_HepG2_LPS_Kac_15cm_ExSen_2hr_ooo	9661
Q13268	Dehydrogenase/reductase SDR family member 2, mitochondrial	DHRS2	1	216.44	1	K	_AM(ox)AK(ac)LQGEGLSVAGIVCHVGK_	79	4	Q13268_79	3	0.12649	0.94383	1.12555	0.83855	25	NVDRAMAKLQGEGLS	20200603_LPS_SILAC_Kac_IP_Combine_120min	6958
P40939	Trifunctional enzyme subunit alpha, mitochondrial	HADHA	1	193.28	1	K	_GQQQVFK(ac)GLNDK_	406	7	P40939_406	2	-1.6367	0.81925	0.977645	0.837983	13	RGQQQVFKGLNDKVK	20200603_LPS_SILAC_Kac_IP_Combine_120min	2957
P68104	Elongation factor 1-alpha 1	EEF1A1	1	75.054	1	K	_VETGVLK(ac)PGMVVTFAPVNVTTEVK_	273	7	P68104_273	3	-0.40843	0.91928	1.0973	0.837765	2	RVETGVLKPGMVVTF	20190709_HepG2_LPS_SILAC_KacIP_CID_120min_AS_1st	29978
Q71DI3	Histone H3.2	H3C15	1	222.2	1	K	_EIAQDFK(ac)TDLR_	80	7	Q71DI3_80	2	-0.98143	1.2576	1.5014	0.837618	8	REIAQDFKTDLRFQS	20190617_HepG2_LPS_SILAC_KacIP_CID_120min_AS_2nd	17427
P10809	60 kDa heat shock protein, mitochondrial	HSPD1	1	228.32	1	K	_GQK(ac)CEFQDAYVLLSEK_	236	3	P10809_236	2	0.52496	0.79828	0.954885	0.835996	13	INTSKGQKCEFQDAY	20190617_HepG2_LPS_SILAC_KacIP_CID_120min_AS_1st	26484
P55084	Trifunctional enzyme subunit beta, mitochondrial	HADHB	1	100.02	1	K	_LSLISK(ac)FR_	201	6	P55084_201	2	-0.82994	0.77714	0.929725	0.835882	2	QRLSLISKFRFNFLA	20190613_HepG2_LPS_SILAC_KacIP_CID_120min_AS_1st-2	16675
P40939	Trifunctional enzyme subunit alpha, mitochondrial	HADHA	1	109.71	1	K	_K(ac)ALTSFER_	415	1	P40939_415	2	-0.14492	0.81659	0.977645	0.835262	1	LNDKVKKKALTSFER	200719_HepG2_LPS_Kac_15cm_ExSen_2hr_ooo	6875
P06748	Nucleophosmin	NPM1	1	94.532	1;2	K	_SAPGGGSK(ac)VPQK(ac)K_	154	12	P06748_154	2	-0.071586	0.83313	0.998465	0.834411	6	GGSKVPQKKVKLAAD	20200603_LPS_SILAC_Kac_IP_Combine_120min	1575
Q9HAV7	GrpE protein homolog 1, mitochondrial	GRPEL1	1	87.568	1	K	_SQK(ac)LVEEAK_	94	3	Q9HAV7_94	2	0.82252	0.78104	0.936445	0.834048	1	NLRQRSQKLVEEAKL	200719_HepG2_LPS_Kac_15cm_ExSen_2hr_ooo	3817
P83731	60S ribosomal protein L24	RPL24	1	113.5	1	K	_NQK(ac)PEVR_	97	3	P83731_97	2	0.17182	0.85353	1.0243	0.833281	1	IMAKRNQKPEVRKAQ	200719_HepG2_LPS_Kac_15cm_ExSen_2hr_ooo	2647
P68036	Ubiquitin-conjugating enzyme E2 L3	UBE2L3	1	74.123	1	K	_IYHPNIDEK(ac)GQVCLPVISAENWKPATK_	82	9	P68036_82	4	-0.91436	0.71674	0.86067	0.83277	2	YHPNIDEKGQVCLPV	20190709_HepG2_LPS_SILAC_KacIP_CID_120min_AS_1st	23972
P07305	Histone H1.0	H1-0	1	43.03	1	K	_(ac)TENSTSAPAAK(ac)PK_	12	11	P07305_12	2	-3.0388	0.7552	0.9069	0.832727	1	STSAPAAKPKRAKAS	200719_HepG2_LPS_Kac_15cm_ExSen_2hr_ooo	5016
P25705	ATP synthase subunit alpha, mitochondrial	ATP5F1A	1	60.598	1	K	_GYLDK(ac)LEPSK_	498	5	P25705_498	2	-0.64058	0.8046	0.967645	0.831503	1	GVRGYLDKLEPSKIT	200719_HepG2_LPS_Kac_15cm_ExSen_2hr_ooo	10895
Q06203	Amidophosphoribosyltransferase	PPAT	1	102.53	1	K	_K(ac)FGVLSDNFK_	372	1	Q06203_372	2	0.22271	0.90345	1.08683	0.831267	4	RQLGVAKKFGVLSDN	200719_HepG2_LPS_Kac_15cm_ExSen_2hr_ooo	11614
P19338	Nucleolin	NCL	1	92.269	1	K	_GATPGK(ac)ALVATPGKK_	116	6	P19338_116	2	-0.47512	0.84497	1.01775	0.830233	5	KKGATPGKALVATPG	20190709_HepG2_LPS_SILAC_KacIP_CID_120min_AS_1st	9377
P05141	ADP/ATP translocase 2	SLC25A5	1	175.27	1	K	_YFPTQALNFAFK(ac)DK_	92	12	P05141_92	2	0.48421	0.88395	1.065	0.83	13	QALNFAFKDKYKQIF	20200603_LPS_SILAC_Kac_IP_Combine_120min	9416
P40926	Malate dehydrogenase, mitochondrial	MDH2	1	134.02	1	K	_ANTFVAELK(ac)GLDPAR_	185	9	P40926_185	2	0.019459	0.77448	0.933245	0.829879	12	NTFVAELKGLDPARV	20190613_HepG2_LPS_SILAC_KacIP_CID_120min_AS_1st-1	25809
P25705	ATP synthase subunit alpha, mitochondrial	ATP5F1A	1	110.35	1	K	_QVAGTM(ox)K(ac)LELAQYR_	434	7	P25705_434	2	0.42005	0.80208	0.967645	0.828899	1	KQVAGTMKLELAQYR	20190617_HepG2_LPS_SILAC_KacIP_CID_120min_AS_1st	21189
P23527	Histone H2B type 1-O	H2BC17	1	223.84	1;2	K	_KAVTK(ac)AQK_	21	5	P23527_21	2	-0.68418	1.066	1.2863	0.828734	12	GSKKAVTKAQKKDGK	20200603_LPS_SILAC_Kac_IP_Combine_120min	573
Q96I24	Far upstream element-binding protein 3	FUBP3	1	141.21	1	K	_QIAAK(ac)IDSIPHLNNSTPLVDPSVYGYGVQK_	32	5	Q96I24_32	3	-0.02791	0.89951	1.0869	0.827592	3	RVRQIAAKIDSIPHL	20190709_HepG2_LPS_SILAC_KacIP_CID_120min_AS_1st	28171
P08238	Heat shock protein HSP 90-beta	HSP90AB1	1	79.461	1	K	_SIYYITGESK(ac)EQVANSAFVER_	491	10	P08238_491	3	-0.2048	0.81423	0.9839	0.827554	1	YYITGESKEQVANSA	20190709_HepG2_LPS_SILAC_KacIP_CID_120min_AS_1st	24841
P00367	Glutamate dehydrogenase 1, mitochondrial	GLUD1	1	114.21	1	K	_INPK(ac)NYTDNELEK_	191	4	P00367_191	2	-1.0852	0.79246	0.95784	0.827341	10	AGVKINPKNYTDNEL	200719_HepG2_LPS_Kac_15cm_ExSen_2hr_ooo	8504
P11142	Heat shock cognate 71 kDa protein	HSPA8	1	73.928	1	K	_IINEPTAAAIAYGLDK(ac)K_	187	16	P11142_187	3	-0.81765	0.8254	0.99867	0.826499	2	AIAYGLDKKVGAERN	20200603_LPS_SILAC_Kac_IP_Combine_120min	7733
P40939	Trifunctional enzyme subunit alpha, mitochondrial	HADHA	1	188.07	1	K	_TGIEQGSDAGYLCESQK(ac)FGELVM(ox)TK_	326	17	P40939_326	3	0.77517	0.80738	0.977645	0.825842	5	GYLCESQKFGELVMT	20190617_HepG2_LPS_SILAC_KacIP_CID_120min_AS_2nd	30040
P51659	Peroxisomal multifunctional enzyme type 2	HSD17B4	1	147.24	1	K	_LQMILK(ac)DYAKL_	731	6	P51659_731	2	-0.10998	0.71405	0.86474	0.82574	6	QKLQMILKDYAKL	20190617_HepG2_LPS_SILAC_KacIP_CID_120min_AS_2nd	18879
P17096	High mobility group protein HMG-I/HMG-Y	HMGA1	1	174.21	1	K	_SSQPLASK(ac)QEK_	15	8	P17096_15	2	-0.56698	0.7582	0.91821	0.825737	5	SSQPLASKQEKDGTE	20200603_LPS_SILAC_Kac_IP_Combine_120min	991
P38646	Stress-70 protein, mitochondrial	HSPA9	1	130.3	1	K	_ASNGDAWVEAHGK(ac)LYSPSQIGAFVLMK_	159	13	P38646_159	3	0.33874	0.83848	1.01573	0.825495	2	AWVEAHGKLYSPSQI	20190709_HepG2_LPS_SILAC_KacIP_CID_120min_AS_2nd	28934
A0A0B4J1R2	Propionate--CoA ligase	ACSS3	1	89.301	1	K	_TLENK(ac)HSPSTR_	97	5	A0A0B4J1R2_97	2	0.16062	0.86564	1.04871	0.825433	2	WTKTLENKHSPSTRF	200719_HepG2_LPS_Kac_15cm_ExSen_2hr_ooo	2368
A0A1X7SBS1	Heterogeneous nuclear ribonucleoprotein U	HNRNPU	1	132.78	1	K	_NQSQGYNQWQQGQFWGQK(ac)PWSQHYHQGYY_	733	18	A0A1X7SBS1_733	4	0.12065	0.82772	1.003	0.825244	6	QGQFWGQKPWSQHYH	20200603_LPS_SILAC_Kac_IP_Combine_120min	8568
A0A0C4DGA2	Enoyl-CoA delta isomerase 2, mitochondrial	ECI2	1	86.898	1	K	_AFAK(ac)LPPNALR_	309	4	A0A0C4DGA2_309	2	0.14571	0.81988	0.99368	0.825095	4	TRLKAFAKLPPNALR	200719_HepG2_LPS_Kac_15cm_ExSen_2hr_ooo	10693
B4DLR8	NAD	NQO1	1	90.05	1	K	_IQILEGWK(ac)K_	137	8	B4DLR8_137	2	0.21299	0.96022	1.16395	0.824967	1	IQILEGWKKRLENIW	20200603_LPS_SILAC_Kac_IP_Combine_120min	6100
A0A0C4DGA2	Enoyl-CoA delta isomerase 2, mitochondrial	ECI2	1	103.74	1	K	_LK(ac)LYALYK_	34	2	A0A0C4DGA2_34	2	1.1084	0.81854	0.99368	0.823746	4	PGNEVKLKLYALYKQ	20190709_HepG2_LPS_SILAC_KacIP_CID_120min_AS_1st	17808
P23526	Adenosylhomocysteinase	AHCY	1	138.4	1	K	_LTK(ac)LTEK_	408	3	P23526_408	2	0.93156	0.8071	0.98025	0.823361	4	KLNVKLTKLTEKQAQ	20200603_LPS_SILAC_Kac_IP_Combine_120min	1490
P19338	Nucleolin	NCL	1	168.08	1	K	_VTLDWAK(ac)PK_	646	7	P19338_646	2	-0.18938	0.83746	1.01775	0.822854	4	KVTLDWAKPKGEGGF	20190709_HepG2_LPS_SILAC_KacIP_CID_120min_AS_1st	21584
P07900	Heat shock protein HSP 90-alpha	HSP90AA1	1	106.6	1	K	_YESLTDPSK(ac)LDSGK_	69	9	P07900_69	2	-0.034863	0.87062	1.0581	0.822814	3	ESLTDPSKLDSGKEL	20190613_HepG2_LPS_SILAC_KacIP_CID_120min_AS_1st-1	11853
P00367	Glutamate dehydrogenase 1, mitochondrial	GLUD1	1	263.9	1	K	_ISGASEK(ac)DIVHSGLAYTM(ox)ER_	503	7	P00367_503	3	0.086591	0.78642	0.95784	0.821035	28	RISGASEKDIVHSGL	20200603_LPS_SILAC_Kac_IP_Combine_120min	6927
B4DK69	Aldo-keto reductase family 1 member C2	AKR1C2	1	152.66	1	K	_LNDGHFM(ox)PVLGFGTYAPAEVPK(ac)SK_	31	22	B4DK69_31	3	-0.15542	0.80564	0.98144	0.820875	9	YAPAEVPKSKALEAV	20200603_LPS_SILAC_Kac_IP_Combine_120min	7890
Q8WW12	PEST proteolytic signal-containing nuclear protein	PCNP	1	253.06	1	K	_SAEEEAADLPTK(ac)PTK_	64	12	Q8WW12_64	2	0.79078	0.70811	0.86277	0.82074	11	EAADLPTKPTKISKF	20190613_HepG2_LPS_SILAC_KacIP_CID_120min_AS_2nd-1	9452
E9PGT1	Component 3 of promoter of RISC	TSN	1	90.05	1	K	_LLNLK(ac)NDSLR_	182	5	E9PGT1_182	2	0.4192	1.1724	1.42875	0.820577	1	GFRLLNLKNDSLRKR	200719_HepG2_LPS_Kac_15cm_ExSen_2hr_ooo	10537
P07108	Acyl-CoA-binding protein	DBI	0.998237	139.49	1	K	_HLK(ac)TKPSDEEMLFIYGHYK_	17	3	P07108_17	4	0.33381	0.85245	1.04124	0.818687	10	AEEVRHLKTKPSDEE	20200603_LPS_SILAC_Kac_IP_Combine_120min	5519
P19338	Nucleolin	NCL	0.983131	50.222	1	K	_VFGNEIK(ac)LEKPK_	377	7	P19338_377	3	-0.39805	0.83216	1.01775	0.817647	1	KVFGNEIKLEKPKGK	200719_HepG2_LPS_Kac_15cm_ExSen_2hr_ooo	7901
Q5T440	Putative transferase CAF17, mitochondrial	IBA57	1	87.196	1	K	_FLDPLPTSGITPGATVLTASGQTVGK(ac)FR_	309	26	Q5T440_309	3	0.43806	0.90273	1.10413	0.81759	6	ASGQTVGKFRAGQGN	20190617_HepG2_LPS_SILAC_KacIP_CID_120min_AS_2nd	33727
Q08426	Peroxisomal bifunctional enzyme	EHHADH	1	137.09	1	K	_ANK(ac)WSTPSGASWK_	280	3	Q08426_280	2	0.31752	0.7147	0.8746	0.817174	5	FAERKANKWSTPSGA	20190613_HepG2_LPS_SILAC_KacIP_CID_120min_AS_2nd-1	11894
P07814	Bifunctional glutamate/proline--tRNA ligase	EPRS1	1	239.51	1	K	_AYVDDTPAEQM(ox)K(ac)AER_	300	12	P07814_300	2	0.17742	0.83414	1.02109	0.816911	2	DTPAEQMKAEREQRI	20190709_HepG2_LPS_SILAC_KacIP_CID_120min_AS_1st	13659
P62937	Peptidyl-prolyl cis-trans isomerase A	PPIA	1	241.15	1	K	_K(ac)ITIADCGQLE_	155	1	P62937_155	2	-0.42414	0.74401	0.911095	0.816611	7	RNGKTSKKITIADCG	20190709_HepG2_LPS_SILAC_KacIP_CID_120min_AS_3rd	16562
P07737	Profilin-1	PFN1	1	91.202	1	K	_TDK(ac)TLVLLMGK_	108	3	P07737_108	2	-0.58344	0.87029	1.067	0.815642	1	VTVTKTDKTLVLLMG	20190613_HepG2_LPS_SILAC_KacIP_CID_120min_AS_1st-1	20726
P23527	Histone H2B type 1-O	H2BC17	1	184.51	1	K	_VLK(ac)QVHPDTGISSK_	47	3	P23527_47	3	0.55029	1.0488	1.2863	0.815362	15	IYVYKVLKQVHPDTG	20190617_HepG2_LPS_SILAC_KacIP_CID_120min_AS_1st	6289
P00367	Glutamate dehydrogenase 1, mitochondrial	GLUD1	1	131.86	1	K	_ELEDFK(ac)LQHGSILGFPK_	352	6	P00367_352	3	0.47221	0.78089	0.95784	0.815261	11	PKELEDFKLQHGSIL	20190617_HepG2_LPS_SILAC_KacIP_CID_120min_AS_1st	27262
M0QZC5	40S ribosomal protein S11	RPS11	1	195.83	1	K	_NIGLGFK(ac)TPK_	45	7	M0QZC5_45	2	0.47376	0.90522	1.1106	0.815073	11	KNIGLGFKTPKEAIE	20190613_HepG2_LPS_SILAC_KacIP_CID_120min_AS_1st-2	11982
P07954	Fumarate hydratase, mitochondrial	FH	1	54.784	1	K	_IGFAEK(ac)VAAK_	292	6	P07954_292	2	0.201	0.74254	0.911265	0.814845	1	TRIGFAEKVAAKVAA	200719_HepG2_LPS_Kac_15cm_ExSen_2hr_ooo	8259
P11021	Endoplasmic reticulum chaperone BiP	HSPA5	1	126.25	1	K	_AVEEK(ac)IEWLESHQDADIEDFK_	601	5	P11021_601	3	0.034399	0.88364	1.0849	0.81449	6	MEKAVEEKIEWLESH	20190613_HepG2_LPS_SILAC_KacIP_CID_120min_AS_2nd-1	27784
P09622	Dihydrolipoyl dehydrogenase, mitochondrial	DLD	1	206.67	1	K	_SEEQLK(ac)EEGIEYK_	410	6	P09622_410	2	-0.46717	0.79101	0.97184	0.81393	1	GKSEEQLKEEGIEYK	20190617_HepG2_LPS_SILAC_KacIP_CID_120min_AS_1st	12638
P48047	ATP synthase subunit O, mitochondrial	ATP5PO	1	207.08	1	K	_TVLK(ac)SFLSQGQVLK_	162	4	P48047_162	2	0.93037	0.8826	1.08482	0.813595	8	SELKTVLKSFLSQGQ	20200603_LPS_SILAC_Kac_IP_Combine_120min	8127
P00367	Glutamate dehydrogenase 1, mitochondrial	GLUD1	1	171.13	1	K	_IIAEGANGPTTPEADK(ac)IFLER_	415	16	P00367_415	3	0.33638	0.779	0.95784	0.813288	11	PTTPEADKIFLERNI	20200603_LPS_SILAC_Kac_IP_Combine_120min	7880
P23527	Histone H2B type 1-O	H2BC17	1	193.1	2	K	_AVTK(ac)AQK(ac)K_	24	7	P23527_24	2	0.087847	1.046	1.2863	0.813185	9	KAVTKAQKKDGKKRK	20200603_LPS_SILAC_Kac_IP_Combine_120min	511
P13639	Elongation factor 2	EEF2	1	110.8	1	K	_FSK(ac)SATSPEGK_	275	3	P13639_275	2	-0.40416	0.82022	1.0093	0.812662	3	PANGKFSKSATSPEG	20190709_HepG2_LPS_SILAC_KacIP_CID_120min_AS_1st	5219
P00558	Phosphoglycerate kinase 1	PGK1	1	87.05	1	K	_WNTEDK(ac)VSHVSTGGGASLELLEGK_	388	6	P00558_388	3	-0.4892	0.78011	0.960415	0.812263	1	AKWNTEDKVSHVSTG	20190709_HepG2_LPS_SILAC_KacIP_CID_120min_AS_2nd	22362
P25705	ATP synthase subunit alpha, mitochondrial	ATP5F1A	1	64.04	1	K	_DNGK(ac)HALIIYDDLSK_	305	4	P25705_305	3	0.16126	0.78586	0.967645	0.812137	4	EYFRDNGKHALIIYD	200719_HepG2_LPS_Kac_15cm_ExSen_2hr_ooo	12485
P34897	Serine hydroxymethyltransferase, mitochondrial	SHMT2	1	190.53	1	K	_LQDFK(ac)SFLLK_	469	5	P34897_469	2	0.14099	0.88082	1.0846	0.812115	14	TAKLQDFKSFLLKDS	20190709_HepG2_LPS_SILAC_KacIP_CID_120min_AS_1st	26088
P53004	Biliverdin reductase A	BLVRA	1	272.09	1	K	_LLGQFSEK(ac)ELAAEK_	269	8	P53004_269	2	0.3295	0.75295	0.92816	0.811229	10	LLGQFSEKELAAEKK	20190709_HepG2_LPS_SILAC_KacIP_CID_120min_AS_2nd	17022
Q15067	Peroxisomal acyl-coenzyme A oxidase 1	ACOX1	1	203.85	1	K	_FLM(ox)K(ac)SYDQVHSGK_	437	4	Q15067_437	2	-0.41604	0.84239	1.03896	0.810797	25	QTARFLMKSYDQVHS	20190709_HepG2_LPS_SILAC_KacIP_CID_120min_AS_1st	11188
Q14204	Cytoplasmic dynein 1 heavy chain 1	DYNC1H1	1	180.2	1	K	_SFDSEFK(ac)LACK_	4283	7	Q14204_4283	2	0.075582	0.82464	1.01795	0.810099	8	RSFDSEFKLACKVDG	20200603_LPS_SILAC_Kac_IP_Combine_120min	5374
Q86V81	THO complex subunit 4	ALYREF	1	141.29	1	K	_QLPDK(ac)WQHDLFDSGFGGGAGVETGGK_	86	5	Q86V81_86	3	0.46325	0.78436	0.968415	0.809942	5	RPKQLPDKWQHDLFD	20200603_LPS_SILAC_Kac_IP_Combine_120min	8918
P60709	Actin, cytoplasmic 1	ACTB	1	219.99	1	K	_HQGVM(ox)VGM(ox)GQK(ac)DSYVGDEAQSK_	50	11	P60709_50	3	0.050381	0.77064	0.951655	0.809789	12	VMVGMGQKDSYVGDE	20190613_HepG2_LPS_SILAC_KacIP_CID_120min_AS_1st-1	11766
Q99613	Eukaryotic translation initiation factor 3 subunit C	EIF3C	1	56.043	1	K	_SIVDK(ac)EGVPR_	99	5	Q99613_99	2	-0.3898	0.8524	1.053	0.809497	1	KAKSIVDKEGVPRFY	200719_HepG2_LPS_Kac_15cm_ExSen_2hr_ooo	7330
Q9P258	Protein RCC2	RCC2	1	63.674	1	K	_GNLYSFGCPEYGQLGHNSDGK(ac)FIAR_	293	21	Q9P258_293	3	-0.1893	0.77346	0.95567	0.809338	1	LGHNSDGKFIARAQR	20190709_HepG2_LPS_SILAC_KacIP_CID_120min_AS_1st	22931
P14866	Heterogeneous nuclear ribonucleoprotein L	HNRNPL	1	149.9	1	K	_QPAIMPGQSYGLEDGSCSYK(ac)DFSESR_	475	20	P14866_475	3	0.25394	0.86692	1.0724	0.808392	3	EDGSCSYKDFSESRN	20190709_HepG2_LPS_SILAC_KacIP_CID_120min_AS_2nd	21862
P62805	Histone H4	H4C1	1	155.58	2	K	_GLGK(ac)GGAK(ac)R_	17	8	P62805_17	2	-0.87236	1.0103	1.25045	0.807949	50	GLGKGGAKRHRKVLR	20200603_LPS_SILAC_Kac_IP_Combine_120min	1205
Q08426	Peroxisomal bifunctional enzyme	EHHADH	1	251	1	K	_IPVIAVDSDK(ac)NQLATANK_	330	10	Q08426_330	3	-0.30739	0.70636	0.8746	0.807638	20	VIAVDSDKNQLATAN	20190617_HepG2_LPS_SILAC_KacIP_CID_120min_AS_1st	19833
P23284	Peptidyl-prolyl cis-trans isomerase B	PPIB	1	71.176	1	K	_TAWLDGK(ac)HVVFGK_	165	7	P23284_165	3	-0.043796	0.88207	1.09235	0.807498	8	KTAWLDGKHVVFGKV	20190613_HepG2_LPS_SILAC_KacIP_CID_120min_AS_1st-1	17758
P10412	Histone H1.4	H1-4	1	223.86	1	K	_(ac)SETAPAAPAAPAPAEK(ac)TPVK_	17	16	P10412_17	3	0.57903	0.70043	0.86769	0.807235	19	AAPAPAEKTPVKKKA	20190613_HepG2_LPS_SILAC_KacIP_CID_120min_AS_1st-1	13461
P00558	Phosphoglycerate kinase 1	PGK1	1	91.549	1	K	_FHVEEEGK(ac)GK_	131	8	P00558_131	2	0.46711	0.77456	0.960415	0.806485	1	FHVEEEGKGKDASGN	200719_HepG2_LPS_Kac_15cm_ExSen_2hr_ooo	3456
Q71DI3	Histone H3.2	H3C15	1	159.28	1;2	K	_STGGK(ac)APR_	15	5	Q71DI3_15	2	-0.39738	1.2107	1.5014	0.806381	19	ARKSTGGKAPRKQLA	20200603_LPS_SILAC_Kac_IP_Combine_120min	463
P06748	Nucleophosmin	NPM1	1	138.24	1	K	_GPSSVEDIK(ac)AK_	248	9	P06748_248	2	-0.14508	0.80513	0.998465	0.806368	3	PSSVEDIKAKMQASI	20200603_LPS_SILAC_Kac_IP_Combine_120min	2074
P0DMV9	Heat shock 70 kDa protein 1B	HSPA1B	1	194.48	1	K	_ANK(ac)ITITNDKGR_	500	3	P0DMV9_500	2	0.42605	0.92779	1.1506	0.806353	16	KSTGKANKITITNDK	20200603_LPS_SILAC_Kac_IP_Combine_120min	1820
P37837	Transaldolase	TALDO1	1	107.69	1	K	_AAQASDLEK(ac)IHLDEK_	286	9	P37837_286	3	0.42649	0.81526	1.01425	0.803806	6	AQASDLEKIHLDEKS	200719_HepG2_LPS_Kac_15cm_ExSen_2hr_ooo	8737
F5H3C5	Superoxide dismutase	SOD2	1	170.47	1	K	_DFGSFDK(ac)FK_	84	7	F5H3C5_84	2	0.41331	0.72454	0.90143	0.803767	8	RDFGSFDKFKEKLTA	20200603_LPS_SILAC_Kac_IP_Combine_120min	6550
P40939	Trifunctional enzyme subunit alpha, mitochondrial	HADHA	1	130.69	1	K	_ALM(ox)GLYHGQVLCK(ac)K_	350	13	P40939_350	2	-0.50799	0.78573	0.977645	0.803697	5	YHGQVLCKKNKFGAP	20190709_HepG2_LPS_SILAC_KacIP_CID_120min_AS_2nd	14532
P40939	Trifunctional enzyme subunit alpha, mitochondrial	HADHA	1	122.78	1	K	_DTSASAVAVGLK(ac)QGK_	531	12	P40939_531	2	0.74421	0.78533	0.977645	0.803287	1	SAVAVGLKQGKVIIV	200719_HepG2_LPS_Kac_15cm_ExSen_2hr_ooo	9487
P22307	Non-specific lipid-transfer protein	SCP2	1	116.24	1	K	_GSLGIK(ac)FSDR_	132	6	P22307_132	2	-0.027506	0.77739	0.968475	0.802695	8	SKGSLGIKFSDRTIP	20200603_LPS_SILAC_Kac_IP_Combine_120min	3967
P10809	60 kDa heat shock protein, mitochondrial	HSPD1	1	120.79	1	K	_IPAM(ox)TIAK(ac)NAGVEGSLIVEK_	481	8	P10809_481	3	0.92881	0.76646	0.954885	0.802673	2	IPAMTIAKNAGVEGS	200719_HepG2_LPS_Kac_15cm_ExSen_2hr_ooo	13489
F2Z2W6	Non-histone chromosomal protein HMG-14	HMGN1	1	83.168	1	K	_LSAK(ac)PPAK_	27	4	F2Z2W6_27	2	0.7644	0.66359	0.82694	0.802465	2	RSARLSAKPPAKVEA	200719_HepG2_LPS_Kac_15cm_ExSen_2hr_ooo	2923
P62269	40S ribosomal protein S18	RPS18	1	119.39	1	K	_(ac)SLVIPEK(ac)FQHILR_	8	7	P62269_8	2	-1.5586	0.80741	1.00636	0.802311	1	MSLVIPEKFQHILRV	20190709_HepG2_LPS_SILAC_KacIP_CID_120min_AS_2nd	30812
P62805	Histone H4	H4C1	1	155.58	1;2	K	_GLGK(ac)GGAK(ac)R_	13	4	P62805_13	2	-0.87236	1.0023	1.25045	0.801551	7	GLGKGGAKRHRKVLR	20200603_LPS_SILAC_Kac_IP_Combine_120min	1205
P10809	60 kDa heat shock protein, mitochondrial	HSPD1	1	99.732	1	K	_TLK(ac)IPAMTIAK_	473	3	P10809_473	2	-1.4717	0.76519	0.954885	0.801343	11	EIIKRTLKIPAMTIA	20190709_HepG2_LPS_SILAC_KacIP_CID_120min_AS_3rd	17840
P52907	F-actin-capping protein subunit alpha-1	CAPZA1	1	191.71	1	K	_IAAK(ac)FITHAPPGEFNEVFNDVR_	19	4	P52907_19	3	-0.66905	0.78444	0.97908	0.801201	2	EKVRIAAKFITHAPP	20190709_HepG2_LPS_SILAC_KacIP_CID_120min_AS_2nd	24470
B3KQV6	Serine/threonine-protein phosphatase 2A 65 kDa regulatory subunit A alpha isoform	PPP2R1A	1	58.01	1	K	_AVGPEITK(ac)TDLVPAFQNLM(ox)K_	101	8	B3KQV6_101	3	0.60544	0.77738	0.97114	0.800482	2	AVGPEITKTDLVPAF	20190613_HepG2_LPS_SILAC_KacIP_CID_120min_AS_1st-2	25833
P00367	Glutamate dehydrogenase 1, mitochondrial	GLUD1	1	198.37	1	K	_VFK(ac)VYNEAGVTFT_	548	3	P00367_548	2	0.38859	0.76673	0.95784	0.800478	4	NAIEKVFKVYNEAGV	20190613_HepG2_LPS_SILAC_KacIP_CID_120min_AS_1st-2	22500
P62906	60S ribosomal protein L10a	RPL10A	1	140.96	1	K	_PK(ac)FSVCVLGDQQHCDEAK_	62	2	P62906_62	3	0.08825	0.81203	1.01535	0.799754	2	LKSTPRPKFSVCVLG	20190613_HepG2_LPS_SILAC_KacIP_CID_120min_AS_1st-1	13467
A0A0B4J1R6	Transketolase	TKT	1	78.401	1	K	_AFGQAK(ac)HQPTAIIAK_	66	6	A0A0B4J1R6_66	3	-0.49987	0.77661	0.97232	0.798719	11	CKAFGQAKHQPTAII	20200603_LPS_SILAC_Kac_IP_Combine_120min	2610
P06733	Alpha-enolase	ENO1	1	126.43	1	K	_AVEHINK(ac)TIAPALVSK_	71	7	P06733_71	2	0.54644	0.70061	0.8785	0.797507	13	KAVEHINKTIAPALV	20200603_LPS_SILAC_Kac_IP_Combine_120min	4356
P35914	Hydroxymethylglutaryl-CoA lyase, mitochondrial	HMGCL	1	274.45	1	K	_K(ac)NINCSIEESFQR_	137	1	P35914_137	2	0.51816	0.70951	0.88979	0.79739	10	ASELFTKKNINCSIE	20190617_HepG2_LPS_SILAC_KacIP_CID_120min_AS_1st	16066
P10599	Thioredoxin	TXN	1	95.273	1	K	_M(ox)IK(ac)PFFHSLSEK_	39	3	P10599_39	2	0.96103	0.85663	1.0747	0.797088	10	CGPCKMIKPFFHSLS	20200603_LPS_SILAC_Kac_IP_Combine_120min	5582
E9PLL6	60S ribosomal protein L27a	RPL27A	1	48.527	1	K	_NK(ac)TGAAPIIDVVR_	94	2	E9PLL6_94	2	-0.56526	0.8119	1.0188	0.796918	1	RVNAAKNKTGAAPII	200719_HepG2_LPS_Kac_15cm_ExSen_2hr_ooo	10800
P09429	High mobility group protein B1	HMGB1	1	95.608	1	K	_FK(ac)DPNAPK_	90	2	P09429_90	2	0.60399	0.74923	0.94029	0.796807	1	GETKKKFKDPNAPKR	200719_HepG2_LPS_Kac_15cm_ExSen_2hr_ooo	3490
P42704	Leucine-rich PPR motif-containing protein, mitochondrial	LRPPRC	1	82.774	1	K	_HDK(ac)VEDALNLKEEFDR_	726	3	P42704_726	3	-0.29981	0.86124	1.0812	0.796559	1	NLCCRHDKVEDALNL	20190617_HepG2_LPS_SILAC_KacIP_CID_120min_AS_1st	21157
P04406	Glyceraldehyde-3-phosphate dehydrogenase	GAPDH	1	159.5	1	K	_GALQNIIPASTGAAK(ac)AVGK_	215	15	P04406_215	2	0.44725	0.78729	0.98917	0.79591	17	PASTGAAKAVGKVIP	20200603_LPS_SILAC_Kac_IP_Combine_120min	6607
Q9P0Z9	Peroxisomal sarcosine oxidase	PIPOX	1	250.46	1	K	_QTGLLLLGMKENQELK(ac)TIQANLSR_	104	16	Q9P0Z9_104	3	0.49086	0.67595	0.84944	0.79576	15	MKENQELKTIQANLS	20190709_HepG2_LPS_SILAC_KacIP_CID_120min_AS_2nd	30127
P51659	Peroxisomal multifunctional enzyme type 2	HSD17B4	1	273.77	1	K	_GALVVVNDLGGDFK(ac)GVGK_	46	14	P51659_46	3	0.2837	0.68812	0.86474	0.795754	22	NDLGGDFKGVGKGSL	20190613_HepG2_LPS_SILAC_KacIP_CID_120min_AS_1st-2	22496
P48735	Isocitrate dehydrogenase [NADP], mitochondrial	IDH2	1	145.73	1	K	_YFDLGLPNRDQTDDQVTIDSALATQK(ac)YSVAVK_	106	26	P48735_106	3	-0.12228	0.81236	1.02263	0.794383	11	DSALATQKYSVAVKC	20190617_HepG2_LPS_SILAC_KacIP_CID_120min_AS_1st	27359
H3BPG0	Cytochrome c oxidase subunit 4 isoform 1, mitochondrial	COX4I1	1	140.78	1	K	_HLSASQK(ac)ALK_	22	7	H3BPG0_22	2	0.37842	0.78352	0.98692	0.793904	6	KHLSASQKALKEKEK	20190709_HepG2_LPS_SILAC_KacIP_CID_120min_AS_1st	2516
P60981	Destrin	DSTN	0.999846	142.58	1	K	_K(ac)FQGIKHECQANGPEDLNR_	127	1	P60981_127	3	-0.60203	0.82979	1.0462	0.793147	3	SKDAIKKKFQGIKHE	20190709_HepG2_LPS_SILAC_KacIP_CID_120min_AS_3rd	7693
P68104	Elongation factor 1-alpha 1	EEF1A1	1	143.24	1	K	_KLEDGPK(ac)FLK_	392	7	P68104_392	2	0.074153	0.86972	1.0973	0.7926	7	KKLEDGPKFLKSGDA	20200603_LPS_SILAC_Kac_IP_Combine_120min	2786
P40926	Malate dehydrogenase, mitochondrial	MDH2	1	99.93	1	K	_GYLGPEQLPDCLK(ac)GCDVVVIPAGVPR_	91	13	P40926_91	3	0.43059	0.73913	0.933245	0.792	9	EQLPDCLKGCDVVVI	20190617_HepG2_LPS_SILAC_KacIP_CID_120min_AS_1st	32957
Q13547	Histone deacetylase 1	HDAC1	1	76.228	1	K	_ISICSSDK(ac)R_	412	8	Q13547_412	2	-0.76699	0.77467	0.97923	0.791101	1	ISICSSDKRIACEEE	200719_HepG2_LPS_Kac_15cm_ExSen_2hr_ooo	4701
P48735	Isocitrate dehydrogenase [NADP], mitochondrial	IDH2	1	81.379	1	K	_VCVETVESGAMTK(ac)DLAGCIHGLSNVK_	413	13	P48735_413	3	0.14316	0.80807	1.02263	0.790188	2	VESGAMTKDLAGCIH	20190617_HepG2_LPS_SILAC_KacIP_CID_120min_AS_1st	27412
P34897	Serine hydroxymethyltransferase, mitochondrial	SHMT2	1	144.1	1	K	_EYSLQVLK(ac)NAR_	356	8	P34897_356	2	0.43014	0.85663	1.0846	0.789812	2	EYSLQVLKNARAMAD	20200603_LPS_SILAC_Kac_IP_Combine_120min	5652
P62877	E3 ubiquitin-protein ligase RBX1	RBX1	1	55.437	1	K	_(ac)AAAM(ox)DVDTPSGTNSGAGK(ac)K_	19	18	P62877_19	2	-0.61729	0.78851	1.0003	0.788274	1	GTNSGAGKKRFEVKK	200719_HepG2_LPS_Kac_15cm_ExSen_2hr_ooo	6492
P00367	Glutamate dehydrogenase 1, mitochondrial	GLUD1	1	190.3	1	K	_CIAVGESDGSIWNPDGIDPK(ac)ELEDFK_	346	20	P00367_346	3	0.29315	0.7549	0.95784	0.788127	6	NPDGIDPKELEDFKL	20190617_HepG2_LPS_SILAC_KacIP_CID_120min_AS_1st	34142
P40939	Trifunctional enzyme subunit alpha, mitochondrial	HADHA	1	159.2	1	K	_GLNDK(ac)VK_	411	5	P40939_411	2	0.87332	0.77049	0.977645	0.788108	9	VFKGLNDKVKKKALT	20200603_LPS_SILAC_Kac_IP_Combine_120min	1440
P28838	Cytosol aminopeptidase	LAP3	1	63.624	1	K	_FAEIIEK(ac)NLK_	221	7	P28838_221	2	0.25212	0.8536	1.08445	0.787127	1	RFAEIIEKNLKSASS	200719_HepG2_LPS_Kac_15cm_ExSen_2hr_ooo	11691
P62424	60S ribosomal protein L7a	RPL7A	1	97.083	1	K	_TCTTVAFTQVNSEDK(ac)GALAK_	212	15	P62424_212	3	1.3659	0.84875	1.0783	0.787119	1	TQVNSEDKGALAKLV	20190709_HepG2_LPS_SILAC_KacIP_CID_120min_AS_1st	17145
D6REM6	Matrin-3	MATR3	0.999999	109.28	1	K	_TDGSQK(ac)TESSTEGKEQEEK_	617	6	D6REM6_617	3	-0.37122	0.72955	0.92708	0.786933	1	SKTDGSQKTESSTEG	200719_HepG2_LPS_Kac_15cm_ExSen_2hr_ooo	2229
M0R1A7	60S ribosomal protein L18a	RPL18A	1	70.942		K	_FTTK(ac)RPNTFF_	141	4	M0R1A7_141	2	1.8901	0.85279	1.0839	0.786779	1	HKPRFTTKRPNTFF	200719_HepG2_LPS_Kac_15cm_ExSen_2hr_ooo	11349
P60709	Actin, cytoplasmic 1	ACTB	1	111.58	1	K	_VAPEEHPVLLTEAPLNPK(ac)ANR_	113	18	P60709_113	3	0.43641	0.74859	0.951655	0.786619	6	TEAPLNPKANREKMT	20190709_HepG2_LPS_SILAC_KacIP_CID_120min_AS_1st	18052
P10809	60 kDa heat shock protein, mitochondrial	HSPD1	1	143.85	1	K	_YK(ac)NIGAK_	91	2	P10809_91	2	1.8271	0.75099	0.954885	0.786472	11	IDLKDKYKNIGAKLV	20200603_LPS_SILAC_Kac_IP_Combine_120min	906
P61158	Actin-related protein 3	ACTR3	0.99999	51.473	1	K	_VM(ox)K(ac)GVDDLDFFIGDEAIEKPTYATK_	53	3	P61158_53	3	-0.76026	0.75585	0.961265	0.786308	2	QAQRRVMKGVDDLDF	20200603_LPS_SILAC_Kac_IP_Combine_120min	9622
P13639	Elongation factor 2	EEF2	1	103.91	1	K	_YFDPANGK(ac)FSK_	272	8	P13639_272	2	0.83474	0.79338	1.0093	0.78607	8	YFDPANGKFSKSATS	200719_HepG2_LPS_Kac_15cm_ExSen_2hr_ooo	9662
O60832	H/ACA ribonucleoprotein complex subunit DKC1	DKC1	1	47.037	1	K	_APQVVAEAAK(ac)TAK_	443	10	O60832_443	2	0.023352	0.71782	0.91343	0.785851	1	QVVAEAAKTAKRKRE	200719_HepG2_LPS_Kac_15cm_ExSen_2hr_ooo	6337
P00367	Glutamate dehydrogenase 1, mitochondrial	GLUD1	1	125.92	1	K	_AK(ac)IIAEGANGPTTPEADKIFLER_	399	2	P00367_399	3	0.33907	0.75111	0.95784	0.784171	7	NAPRVKAKIIAEGAN	20200603_LPS_SILAC_Kac_IP_Combine_120min	7002
Q14690	Protein RRP5 homolog	PDCD11	1	165.51	1	K	_YSHVSQHSPSK(ac)K_	1363	11	Q14690_1363	3	0.52116	0.82472	1.05285	0.783321	3	VSQHSPSKKALYNKH	20200603_LPS_SILAC_Kac_IP_Combine_120min	337
P06748	Nucleophosmin	NPM1	0.999999	138.66	1	K	_ADKDYHFK(ac)VDNDENEHQLSLR_	32	8	P06748_32	4	-0.15768	0.78191	0.998465	0.783112	10	ADKDYHFKVDNDENE	20200603_LPS_SILAC_Kac_IP_Combine_120min	3870
P61604	10 kDa heat shock protein, mitochondrial	HSPE1	1	277.64	1	K	_SQGK(ac)VLQATVVAVGSGSK_	40	4	P61604_40	3	-1.3176	0.82403	1.05356	0.782142	17	LPEKSQGKVLQATVV	20190617_HepG2_LPS_SILAC_KacIP_CID_120min_AS_1st	16994
Q71DI3	Histone H3.2	H3C15	1	227.27	2	K	_K(ac)QLATK(ac)AAR_	19	1	Q71DI3_19	3	-0.31649	1.1737	1.5014	0.781737	42	TGGKAPRKQLATKAA	20200603_LPS_SILAC_Kac_IP_Combine_120min	1534
P23284	Peptidyl-prolyl cis-trans isomerase B	PPIB	1	86.497	1	K	_LK(ac)HYGPGWVSMANAGK_	131	2	P23284_131	3	0.55459	0.85309	1.09235	0.780968	4	PDENFKLKHYGPGWV	20190617_HepG2_LPS_SILAC_KacIP_CID_120min_AS_2nd	14081
Q96PK6	RNA-binding protein 14	RBM14	1	95.273	1	K	_AAIAQLNGK(ac)EVK_	135	9	Q96PK6_135	2	-0.089636	0.7192	0.921345	0.780598	3	AIAQLNGKEVKGKRI	20200603_LPS_SILAC_Kac_IP_Combine_120min	2873
P22626	Heterogeneous nuclear ribonucleoproteins A2/B1	HNRNPA2B1	1	147.7	1	K	_EESGKPGAHVTVK(ac)K_	112	13	P22626_112	2	0.82469	0.72297	0.92694	0.779953	6	PGAHVTVKKLFVGGI	20200603_LPS_SILAC_Kac_IP_Combine_120min	559
P06576	ATP synthase subunit beta, mitochondrial	ATP5F1B	1	163.56	1	K	_VLDSGAPIK(ac)IPVGPETLGR_	133	9	P06576_133	3	0.40509	0.75032	0.96249	0.779561	19	LDSGAPIKIPVGPET	20190613_HepG2_LPS_SILAC_KacIP_CID_120min_AS_1st-2	22314
Q71DI3	Histone H3.2	H3C15	1	121.29	1	K	_YQK(ac)STELLIR_	57	3	Q71DI3_57	2	0.55833	1.1694	1.5014	0.778873	7	REIRRYQKSTELLIR	20190617_HepG2_LPS_SILAC_KacIP_CID_120min_AS_2nd	14570
O00299	Chloride intracellular channel protein 1	CLIC1	1	281.5	1	K	_FSAYIK(ac)NSNPALNDNLEK_	119	6	O00299_119	2	0.92914	0.78331	1.00731	0.777626	9	AKFSAYIKNSNPALN	20200603_LPS_SILAC_Kac_IP_Combine_120min	6057
A0A0B4J1Z1	Serine/arginine-rich-splicing factor 7	SRSF7	1	215.49	1	K	_VYVGNLGTGAGK(ac)GELER_	24	12	A0A0B4J1Z1_24	2	1.0943	0.93887	1.20805	0.777178	9	NLGTGAGKGELERAF	20190709_HepG2_LPS_SILAC_KacIP_CID_120min_AS_1st	16004
Q71UI9	Histone H2A.V	H2AZ2	1	176.87	2	K	_AGGK(ac)AGK(ac)DSGK_	5	4	Q71UI9_5	2	1.034	1.0399	1.33935	0.776421	10	MAGGKAGKDSGK	20190613_HepG2_LPS_SILAC_KacIP_CID_120min_AS_1st-1	389
P06744	Glucose-6-phosphate isomerase	GPI	1	72.207	1	K	_LLPHK(ac)VFEGNRPTNSIVFTK_	466	5	P06744_466	4	-1.5073	0.73539	0.94986	0.774209	8	LERLLPHKVFEGNRP	20200603_LPS_SILAC_Kac_IP_Combine_120min	5537
P10809	60 kDa heat shock protein, mitochondrial	HSPD1	1	94.309	1	K	_SIDLK(ac)DK_	87	5	P10809_87	2	0.25447	0.73849	0.954885	0.773381	3	VAKSIDLKDKYKNIG	200719_HepG2_LPS_Kac_15cm_ExSen_2hr_ooo	5790
P63313	Thymosin beta-10	TMSB10	1	56.817	2	K	_ADK(ac)PDM(ox)GEIASFDK(ac)AK_	4	3	P63313_4	2	-0.47515	1.0002	1.29355	0.773221	1	MADKPDMGEIA	200719_HepG2_LPS_Kac_15cm_ExSen_2hr_ooo	9655
P63313	Thymosin beta-10	TMSB10	1	56.817	2	K	_ADK(ac)PDM(ox)GEIASFDK(ac)AK_	15	14	P63313_15	2	-0.47515	1.0002	1.29355	0.773221	1	MADKPDMGEIA	200719_HepG2_LPS_Kac_15cm_ExSen_2hr_ooo	9655
P60709	Actin, cytoplasmic 1	ACTB	1	135.86	1	K	_IK(ac)IIAPPERK_	328	2	P60709_328	3	-0.2413	0.73575	0.951655	0.773127	15	APSTMKIKIIAPPER	20190617_HepG2_LPS_SILAC_KacIP_CID_120min_AS_1st	11756
P40227	T-complex protein 1 subunit zeta	CCT6A	1	169.21	1	K	_SVTLLIK(ac)GPNK_	377	7	P40227_377	2	1.0263	0.79632	1.03105	0.772339	9	RSVTLLIKGPNKHTL	20200603_LPS_SILAC_Kac_IP_Combine_120min	4585
P62807	Histone H2B type 1-C/E/F/G/I	H2BC4	1	65.179	2	K	_SAPAPK(ac)K(ac)GSK_	13	7	P62807_13	2	0.27623	0.96155	1.2477	0.770658	2	AKSAPAPKKGSKKAV	200719_HepG2_LPS_Kac_15cm_ExSen_2hr_ooo	2325
P18669	Phosphoglycerate mutase 1	PGAM1	1	158.31	1	K	_AETAAK(ac)HGEAQVK_	106	6	P18669_106	2	-1.0011	0.76758	0.996845	0.770009	4	NKAETAAKHGEAQVK	20200603_LPS_SILAC_Kac_IP_Combine_120min	470
P04406	Glyceraldehyde-3-phosphate dehydrogenase	GAPDH	1	107.39	1	K	_YDNSLK(ac)IISNASCTTNCLAPLAK_	145	6	P04406_145	3	-0.34085	0.76151	0.98917	0.769847	7	EKYDNSLKIISNASC	20190617_HepG2_LPS_SILAC_KacIP_CID_120min_AS_2nd	26843
P40926	Malate dehydrogenase, mitochondrial	MDH2	1	63.864	1	K	_GIEK(ac)NLGIGK_	301	4	P40926_301	2	0.3271	0.71664	0.933245	0.767901	1	LGKKGIEKNLGIGKV	20200603_LPS_SILAC_Kac_IP_Combine_120min	3404
Q08426	Peroxisomal bifunctional enzyme	EHHADH	1	97.823	1	K	_WSTPSGASWK(ac)TASARPVSSVGVVGLGTMGR_	290	10	Q08426_290	3	0.34708	0.67151	0.8746	0.767791	2	TPSGASWKTASARPV	20190709_HepG2_LPS_SILAC_KacIP_CID_120min_AS_1st	25291
Q15067	Peroxisomal acyl-coenzyme A oxidase 1	ACOX1	1	142.98	1	K	_HLK(ac)SLQSK_	654	3	Q15067_654	2	0.8748	0.79651	1.03896	0.766638	2	HESYKHLKSLQSKL	20200603_LPS_SILAC_Kac_IP_Combine_120min	605
Q13825	Methylglutaconyl-CoA hydratase, mitochondrial	AUH	1	95.073	1	K	_VAASSAK(ac)M(ox)GLVETK_	204	7	Q13825_204	2	0.48311	0.8024	1.0473	0.766161	2	RVAASSAKMGLVETK	200719_HepG2_LPS_Kac_15cm_ExSen_2hr_ooo	6336
P10809	60 kDa heat shock protein, mitochondrial	HSPD1	0.952586	175.65	1	K	_IQEIIEQLDVTTSEYEKEK(ac)LNER_	389	19	P10809_389	3	-0.17778	0.73089	0.954885	0.765422	10	TSEYEKEKLNERLAK	20190709_HepG2_LPS_SILAC_KacIP_CID_120min_AS_2nd	27496
P62750	60S ribosomal protein L23a	RPL23A	1	83.869	1	K	_NK(ac)LDHYAIIK_	70	2	P62750_70	3	0.12465	0.76148	0.995665	0.764795	5	KSAPRRNKLDHYAII	20190613_HepG2_LPS_SILAC_KacIP_CID_120min_AS_2nd-2	10375
P61604	10 kDa heat shock protein, mitochondrial	HSPE1	1	68.481	1	K	_VGDK(ac)VLLPEYGGTK_	70	4	P61604_70	2	0.58911	0.80496	1.05356	0.764042	8	VSVKVGDKVLLPEYG	200719_HepG2_LPS_Kac_15cm_ExSen_2hr_ooo	11225
P53396	ATP-citrate synthase	ACLY	1	49.141	1	K	_DEPSVAAM(ox)VYPFTGDHK(ac)QK_	538	17	P53396_538	3	-0.1052	0.84756	1.11085	0.762983	2	YPFTGDHKQKFYWGH	20190709_HepG2_LPS_SILAC_KacIP_CID_120min_AS_1st	22684
P30101	Protein disulfide-isomerase A3	PDIA3	1	101.72	1	K	_FLDAGHK(ac)LNFAVASR_	296	7	P30101_296	3	-0.57868	0.73305	0.960995	0.762803	1	KFLDAGHKLNFAVAS	20190617_HepG2_LPS_SILAC_KacIP_CID_120min_AS_1st	21136
P61956	Small ubiquitin-related modifier 2	SUMO2	1	193.45	1	K	_VAGQDGSVVQFK(ac)IK_	33	12	P61956_33	2	0.37818	0.73915	0.97023	0.76183	8	DGSVVQFKIKRHTPL	20200603_LPS_SILAC_Kac_IP_Combine_120min	5016
P51659	Peroxisomal multifunctional enzyme type 2	HSD17B4	1	148.78	1	K	_LK(ac)DIGPEVVKK_	636	2	P51659_636	3	-1.2162	0.65847	0.86474	0.761466	9	EEIGRRLKDIGPEVV	20190709_HepG2_LPS_SILAC_KacIP_CID_120min_AS_1st	8568
P04075	Fructose-bisphosphate aldolase A	ALDOA	1	147.52	1	K	_YASICQQNGIVPIVEPEILPDGDHDLK(ac)R_	200	27	P04075_200	3	-0.9325	0.69359	0.911145	0.761229	10	PDGDHDLKRCQYVTE	20200603_LPS_SILAC_Kac_IP_Combine_120min	9447
Q08J23	RNA cytosine C	NSUN2	1	223.08	1	K	_VINTGIK(ac)VWCR_	586	7	Q08J23_586	2	-0.82638	0.78099	1.026	0.761199	5	KVINTGIKVWCRNNS	20190709_HepG2_LPS_SILAC_KacIP_CID_120min_AS_1st	17168
P00367	Glutamate dehydrogenase 1, mitochondrial	GLUD1	0.80814	102.39	1	K	_K(ac)FGKHGGTIPIVPTAEFQDR_	477	1	P00367_477	3	1.3467	0.729	0.95784	0.761087	2	VQESLERKFGKHGGT	200719_HepG2_LPS_Kac_15cm_ExSen_2hr_ooo	10759
P38646	Stress-70 protein, mitochondrial	HSPA9	1	166.9	1	K	_TIAPCQK(ac)AM(ox)QDAEVSK_	368	7	P38646_368	2	0.10046	0.77271	1.01573	0.760744	9	RTIAPCQKAMQDAEV	20190617_HepG2_LPS_SILAC_KacIP_CID_120min_AS_1st	13573
Q71DI3	Histone H3.2	H3C15	1	227.27	1;2	K	_QLATK(ac)AAR_	24	5	Q71DI3_24	2	-1.2879	1.1419	1.5014	0.760557	46	PRKQLATKAARKSAP	20200603_LPS_SILAC_Kac_IP_Combine_120min	1534
E9PLL6	60S ribosomal protein L27a	RPL27A	1	60.157	1	K	_INFDK(ac)YHPGYFGK_	47	5	E9PLL6_47	3	0.66183	0.77384	1.0188	0.75956	2	HHRINFDKYHPGYFG	20200603_LPS_SILAC_Kac_IP_Combine_120min	5615
P06733	Alpha-enolase	ENO1	1	284.07	1	K	_SCNCLLLK(ac)VNQIGSVTESLQACK_	343	8	P06733_343	2	-0.18681	0.66727	0.8785	0.759556	20	SCNCLLLKVNQIGSV	20190709_HepG2_LPS_SILAC_KacIP_CID_120min_AS_3rd	31345
P68104	Elongation factor 1-alpha 1	EEF1A1	1	118.5	1	K	_FEK(ac)EAAEM(ox)GK_	44	3	P68104_44	2	-1.0091	0.83324	1.0973	0.759355	5	RTIEKFEKEAAEMGK	20190709_HepG2_LPS_SILAC_KacIP_CID_120min_AS_1st	14464
P02795	Metallothionein-2	MT2A	1	169.17	1	K	_CAQGCICK(ac)GASDK_	51	8	P02795_51	2	0.67101	0.38536	0.50799	0.758598	1	CAQGCICKGASDKCS	20190617_HepG2_LPS_SILAC_KacIP_CID_120min_AS_1st	2748
P47755	F-actin-capping protein subunit alpha-2	CAPZA2	1	118.05	1	K	_IEGYEDQVLITEHGDLGNGK(ac)FLDPK_	86	20	P47755_86	3	-0.15487	0.73209	0.96677	0.757254	7	HGDLGNGKFLDPKNR	20200603_LPS_SILAC_Kac_IP_Combine_120min	8518
Q13151	Heterogeneous nuclear ribonucleoprotein A0	HNRNPA0	1	81.92	1	K	_AEIIADK(ac)QSGK_	133	7	Q13151_133	2	-1.3218	0.9598	1.26795	0.75697	1	KAEIIADKQSGKKRG	200719_HepG2_LPS_Kac_15cm_ExSen_2hr_ooo	4607
Q9P0Z9	Peroxisomal sarcosine oxidase	PIPOX	1	194.67	1	K	_HPK(ac)YDNIVIGAGFSGHGFK_	336	3	Q9P0Z9_336	3	0.4981	0.64197	0.84944	0.755757	7	FILDRHPKYDNIVIG	20200603_LPS_SILAC_Kac_IP_Combine_120min	5618
P62258	14-3-3 protein epsilon	YWHAE	1	115.1	1	K	_NLLSVAYK(ac)NVIGAR_	50	8	P62258_50	2	-0.13926	0.98347	1.30155	0.755614	1	NLLSVAYKNVIGARR	20190613_HepG2_LPS_SILAC_KacIP_CID_120min_AS_2nd-2	23589
P40939	Trifunctional enzyme subunit alpha, mitochondrial	HADHA	1	198.81	1	K	_INSPNSK(ac)VNTLSK_	60	7	P40939_60	2	-0.50907	0.73858	0.977645	0.755468	11	RINSPNSKVNTLSKE	20190617_HepG2_LPS_SILAC_KacIP_CID_120min_AS_1st	8283
P61254	60S ribosomal protein L26	RPL26	0.999999	89.301	1	K	_YKEETIEK(ac)M(ox)QE_	142	8	P61254_142	2	-0.60617	0.78102	1.0369	0.753226	1	YKEETIEKMQE	200719_HepG2_LPS_Kac_15cm_ExSen_2hr_ooo	4814
Q71DI3	Histone H3.2	H3C15	1	125.82	1	K	_VTIMPK(ac)DIQLAR_	123	6	Q71DI3_123	2	0.40638	1.1307	1.5014	0.753097	9	KRVTIMPKDIQLARR	20190613_HepG2_LPS_SILAC_KacIP_CID_120min_AS_2nd-2	16840
P43155	Carnitine O-acetyltransferase	CRAT	1	75.652	1	K	_AYNTLIK(ac)DK_	268	7	P43155_268	2	-0.49709	0.67675	0.89897	0.752806	1	KAYNTLIKDKVNRDS	200719_HepG2_LPS_Kac_15cm_ExSen_2hr_ooo	6589
P22234	Multifunctional protein ADE2 [Includes: Phosphoribosylaminoimidazole-succinocarboxamide synthase	PAICS	1	40.278	1	K	_DLK(ac)EVTPEGLQM(ox)VK_	235	3	P22234_235	2	0.18432	0.84726	1.1265	0.752117	1	KQSYRDLKEVTPEGL	200719_HepG2_LPS_Kac_15cm_ExSen_2hr_ooo	11757
P40926	Malate dehydrogenase, mitochondrial	MDH2	1	107.39	1	K	_VNVPVIGGHAGK(ac)TIIPLISQCTPK_	203	12	P40926_203	3	-0.4654	0.70079	0.933245	0.750917	9	VIGGHAGKTIIPLIS	20190709_HepG2_LPS_SILAC_KacIP_CID_120min_AS_1st	25750
P10809	60 kDa heat shock protein, mitochondrial	HSPD1	1	182.7	1	K	_GYISPYFINTSK(ac)GQK_	233	12	P10809_233	2	0.017985	0.71606	0.954885	0.749891	2	PYFINTSKGQKCEFQ	20190709_HepG2_LPS_SILAC_KacIP_CID_120min_AS_1st	19018
E7ETK0	40S ribosomal protein S24	RPS24	1	96.591	1	K	_THFGGGK(ac)TTGFGM(ox)IYDSLDYAK_	68	7	E7ETK0_68	3	0.12975	1.0081	1.3447	0.749684	7	RTHFGGGKTTGFGMI	20190709_HepG2_LPS_SILAC_KacIP_CID_120min_AS_1st	26191
P23527	Histone H2B type 1-O	H2BC17	1	180.39	1	K	_LLLPGELAK(ac)HAVSEGTK_	109	9	P23527_109	3	0.27195	0.96323	1.2863	0.748838	21	LLPGELAKHAVSEGT	20190613_HepG2_LPS_SILAC_KacIP_CID_120min_AS_2nd-2	17166
P40939	Trifunctional enzyme subunit alpha, mitochondrial	HADHA	1	78.615	1	K	_GLYPAPLK(ac)IIDVVK_	303	8	P40939_303	2	1.1189	0.73115	0.977645	0.747869	4	GLYPAPLKIIDVVKT	20190709_HepG2_LPS_SILAC_KacIP_CID_120min_AS_1st	30200
Q96I59	Probable asparagine--tRNA ligase, mitochondrial	NARS2	1	171.11	1	K	_CPEDVELCHK(ac)FIAPGQK_	300	10	Q96I59_300	3	0.013322	0.70411	0.94166	0.747733	4	EDVELCHKFIAPGQK	20200603_LPS_SILAC_Kac_IP_Combine_120min	5262
H3BM30	Enoyl-[acyl-carrier-protein] reductase, mitochondrial	MECR	1	89.468	1	K	_LALNCVGGK(ac)SSTELLR_	140	9	H3BM30_140	2	0.54866	0.81664	1.0922	0.747702	3	ALNCVGGKSSTELLR	200719_HepG2_LPS_Kac_15cm_ExSen_2hr_ooo	12568
O00299	Chloride intracellular channel protein 1	CLIC1	1	205.33	1	K	_NSNPALNDNLEK(ac)GLLK_	131	12	O00299_131	2	-0.4008	0.75316	1.00731	0.747694	3	ALNDNLEKGLLKALK	20200603_LPS_SILAC_Kac_IP_Combine_120min	6348
P23527	Histone H2B type 1-O	H2BC17	1	65.179	2	K	_SAPAPK(ac)K(ac)GSK_	12	6	P23527_12	2	0.27623	0.96155	1.2863	0.747532	2	AKSAPAPKKGSKKAV	200719_HepG2_LPS_Kac_15cm_ExSen_2hr_ooo	2325
P23527	Histone H2B type 1-O	H2BC17	1	65.179	2	K	_SAPAPK(ac)K(ac)GSK_	13	7	P23527_13	2	0.27623	0.96155	1.2863	0.747532	2	AKSAPAPKKGSKKAV	200719_HepG2_LPS_Kac_15cm_ExSen_2hr_ooo	2325
P22307	Non-specific lipid-transfer protein	SCP2	1	156.08	1	K	_M(ox)NPQSAFFQGK(ac)LK_	522	11	P22307_522	2	-0.044842	0.72376	0.968475	0.747319	8	QSAFFQGKLKITGNM	20190709_HepG2_LPS_SILAC_KacIP_CID_120min_AS_1st	19479
A0A0C4DGA2	Enoyl-CoA delta isomerase 2, mitochondrial	ECI2	1	220.37	1	K	_DFENSM(ox)NQVK(ac)LLK_	21	10	A0A0C4DGA2_21	2	0.62138	0.74215	0.99368	0.74687	8	ENSMNQVKLLKKDPG	20200603_LPS_SILAC_Kac_IP_Combine_120min	7508
P18859	ATP synthase-coupling factor 6, mitochondrial	ATP5PF	1	144.29	1	K	_FEDPK(ac)FEVIEKPQA_	99	5	P18859_99	2	0.37068	0.67433	0.90387	0.746048	1	TFKFEDPKFEVIEKP	20200603_LPS_SILAC_Kac_IP_Combine_120min	6953
O60701	UDP-glucose 6-dehydrogenase	UGDH	1	90.765	1	K	_VLDGLHNELQTIGFQIETIGK(ac)K_	464	21	O60701_464	3	0.053979	0.76028	1.01913	0.746009	1	FQIETIGKKVSSKRI	20190709_HepG2_LPS_SILAC_KacIP_CID_120min_AS_1st	33051
P51659	Peroxisomal multifunctional enzyme type 2	HSD17B4	1	190.37	1	K	_FAKPVYPGQTLQTEMWK(ac)EGNR_	579	17	P51659_579	3	-0.089081	0.64461	0.86474	0.745438	2	TLQTEMWKEGNRIHF	20190709_HepG2_LPS_SILAC_KacIP_CID_120min_AS_2nd	18848
F8W6I7	Helix-destabilizing protein	HNRNPA1	1	128.74	1	K	_SHFEQWGTLTDCVVM(ox)RDPNTK(ac)R_	52	21	F8W6I7_52	3	0.28943	1.02	1.3714	0.743765	10	VMRDPNTKRSRGFGF	20190709_HepG2_LPS_SILAC_KacIP_CID_120min_AS_1st	19971
P40926	Malate dehydrogenase, mitochondrial	MDH2	1	123.14	1	K	_VSSFEEK(ac)MISDAIPELK_	314	7	P40926_314	3	-0.56776	0.69346	0.933245	0.743063	7	KVSSFEEKMISDAIP	20190613_HepG2_LPS_SILAC_KacIP_CID_120min_AS_1st-1	29170
Q92793	CREB-binding protein	CREBBP	1	92.856	1	K	_(ac)AENLLDGPPNPK(ac)R_	13	12	Q92793_13	2	-0.35276	0.69954	0.94392	0.741101	2	LDGPPNPKRAKLSSP	200719_HepG2_LPS_Kac_15cm_ExSen_2hr_ooo	13673
A0A0U1RQF0	3-hydroxyacyl-[acyl-carrier-protein] dehydratase	FASN	1	106.32	1	K	_SLYQSAGVAPESFEYIEAHGTGTK(ac)VGDPQELNGITR_	298	24	A0A0U1RQF0_298	3	-0.7647	0.75521	1.0197	0.74062	19	EAHGTGTKVGDPQEL	20190709_HepG2_LPS_SILAC_KacIP_CID_120min_AS_1st	27951
P00367	Glutamate dehydrogenase 1, mitochondrial	GLUD1	1	217.2	1	K	_TAAYVNAIEK(ac)VFK_	545	10	P00367_545	2	-1.2863	0.70904	0.95784	0.740249	9	AYVNAIEKVFKVYNE	20190617_HepG2_LPS_SILAC_KacIP_CID_120min_AS_1st	28289
P08559	Pyruvate dehydrogenase E1 component subunit alpha, somatic form, mitochondrial	PDHA1	1	108.56	1	K	_SKSDPIM(ox)LLK(ac)DR_	321	10	P08559_321	3	0.59878	0.80521	1.08857	0.739699	13	SDPIMLLKDRMVNSN	20190613_HepG2_LPS_SILAC_KacIP_CID_120min_AS_1st-1	14186
P07900	Heat shock protein HSP 90-alpha	HSP90AA1	1	49.298	1	K	_EFEGK(ac)TLVSVTK_	539	5	P07900_539	2	-0.14668	0.78164	1.0581	0.73872	1	QLKEFEGKTLVSVTK	200719_HepG2_LPS_Kac_15cm_ExSen_2hr_ooo	10746
Q71UI9	Histone H2A.V	H2AZ2	1	176.87	2	K	_AGK(ac)DSGK(ac)AK_	8	3	Q71UI9_8	2	0.38884	0.98881	1.33935	0.738276	20	MAGGKAGKDSGKAKA	20190613_HepG2_LPS_SILAC_KacIP_CID_120min_AS_1st-1	389
P08559	Pyruvate dehydrogenase E1 component subunit alpha, somatic form, mitochondrial	PDHA1	1	78.192	1	K	_ADQLYK(ac)QK_	83	6	P08559_83	2	0.32253	0.803	1.08857	0.737668	1	LKADQLYKQKIIRGF	200719_HepG2_LPS_Kac_15cm_ExSen_2hr_ooo	3465
Q08426	Peroxisomal bifunctional enzyme	EHHADH	1	182.19	1	K	_IPVIAVDSDKNQLATANK(ac)MITSVLEK_	338	18	Q08426_338	3	-0.33939	0.64481	0.8746	0.737263	6	NQLATANKMITSVLE	20190709_HepG2_LPS_SILAC_KacIP_CID_120min_AS_2nd	30972
A0A0C4DGA2	Enoyl-CoA delta isomerase 2, mitochondrial	ECI2	1	178.03	1	K	_AK(ac)WDAWNALGSLPK_	62	2	A0A0C4DGA2_62	2	-0.35635	0.73257	0.99368	0.737229	9	FDLINKAKWDAWNAL	20200603_LPS_SILAC_Kac_IP_Combine_120min	9711
P55084	Trifunctional enzyme subunit beta, mitochondrial	HADHB	1	125.71	1	K	_LM(ox)LDLNK(ac)AK_	188	7	P55084_188	2	1.864	0.68537	0.929725	0.737175	7	KLMLDLNKAKSMGQR	20200603_LPS_SILAC_Kac_IP_Combine_120min	4841
Q9Y678	Coatomer subunit gamma-1	COPG1	1	76.759	1	K	_TESTPITAVK(ac)QPEK_	600	10	Q9Y678_600	2	-0.041744	0.72206	0.98116	0.735925	1	STPITAVKQPEKVAA	200719_HepG2_LPS_Kac_15cm_ExSen_2hr_ooo	7192
A0A0U1RQF0	3-hydroxyacyl-[acyl-carrier-protein] dehydratase	FASN	0.935455	58.024	1	K	_VVVQVLAEEPEAVLK(ac)GAKPK_	1864	15	A0A0U1RQF0_1864	3	-0.068209	0.74957	1.0197	0.735089	1	EEPEAVLKGAKPKLM	20200603_LPS_SILAC_Kac_IP_Combine_120min	7896
G3V5E4	Glucosamine 6-phosphate N-acetyltransferase	GNPNAT1	1	127.07	1	K	_ITLECLPQNVGFYK(ac)K_	95	14	G3V5E4_95	3	1.2	0.72585	0.98841	0.734361	4	PQNVGFYKKFGYTVS	20190709_HepG2_LPS_SILAC_KacIP_CID_120min_AS_2nd	22748
P27348	14-3-3 protein theta	YWHAQ	1	88.338	1	K	_AK(ac)LAEQAER_	11	2	P27348_11	2	-0.20791	0.84914	1.15725	0.733757	2	TELIQKAKLAEQAER	20200603_LPS_SILAC_Kac_IP_Combine_120min	1313
A0A3B3ISL2	Paternally-expressed gene 3 protein	PEG3	1	81.565	1	K	_SVIHSLVASK(ac)PPR_	718	10	A0A3B3ISL2_718	3	-0.3402	0.71412	0.97327	0.733733	2	IHSLVASKPPRSHNG	200719_HepG2_LPS_Kac_15cm_ExSen_2hr_ooo	7685
P00505	Aspartate aminotransferase, mitochondrial	GOT2	1	85.355	1	K	_VESQLK(ac)ILIRPM(ox)YSNPPLNGAR_	309	6	P00505_309	3	0.25309	0.77331	1.05453	0.733322	3	KRVESQLKILIRPMY	20200603_LPS_SILAC_Kac_IP_Combine_120min	7433
E5RFP6	Voltage-dependent anion-selective channel protein 3	VDAC3	1	225.31	1	K	_(ac)CNTPTYCDLGK(ac)AAK_	12	11	E5RFP6_12	2	-1.1836	0.84084	1.1473	0.732886	3	PTYCDLGKAAKDVFN	20190709_HepG2_LPS_SILAC_KacIP_CID_120min_AS_3rd	14927
Q5QNW6	Histone H2B type 2-F	H2BC18	1	204.79	1;2	K	_KAVTK(ac)VQK_	21	5	Q5QNW6_21	2	-0.17726	0.91425	1.2477	0.732748	20	GSKKAVTKVQKKDGK	20200603_LPS_SILAC_Kac_IP_Combine_120min	441
P40939	Trifunctional enzyme subunit alpha, mitochondrial	HADHA	1	116.43	1	K	_K(ac)TVLGTPEVLLGALPGAGGTQR_	166	1	P40939_166	3	0.7546	0.71587	0.977645	0.732239	2	RIATKDRKTVLGTPE	20190709_HepG2_LPS_SILAC_KacIP_CID_120min_AS_1st	29398
P00505	Aspartate aminotransferase, mitochondrial	GOT2	1	100.79	1	K	_TQLVSNLK(ac)K_	363	8	P00505_363	2	-0.9243	0.77201	1.05453	0.732089	2	TQLVSNLKKEGSTHN	20200603_LPS_SILAC_Kac_IP_Combine_120min	2309
Q9BSE5	Agmatinase, mitochondrial	AGMAT	1	168.64	1	K	_HGPVGLLHVDAHTDTTDK(ac)ALGEK_	193	18	Q9BSE5_193	4	-0.075667	0.6997	0.95595	0.731942	1	AHTDTTDKALGEKLY	20200603_LPS_SILAC_Kac_IP_Combine_120min	4127
P25705	ATP synthase subunit alpha, mitochondrial	ATP5F1A	1	209.11	1	K	_ADGK(ac)ISEQSDAK_	531	4	P25705_531	2	-0.17132	0.70801	0.967645	0.731684	10	GTIRADGKISEQSDA	20200603_LPS_SILAC_Kac_IP_Combine_120min	864
P07237	Protein disulfide-isomerase	P4HB	1	126.07	1	K	_IK(ac)PHLMSQELPEDWDKQPVK_	352	2	P07237_352	4	-0.16876	0.71948	0.983695	0.731406	6	RFLEGKIKPHLMSQE	20190709_HepG2_LPS_SILAC_KacIP_CID_120min_AS_1st	18121
P04406	Glyceraldehyde-3-phosphate dehydrogenase	GAPDH	1	85.387	1	K	_VIISAPSADAPMFVM(ox)GVNHEK(ac)YDNSLK_	139	21	P04406_139	3	-0.38221	0.72334	0.98917	0.73126	20	VMGVNHEKYDNSLKI	20190709_HepG2_LPS_SILAC_KacIP_CID_120min_AS_3rd	23119
P54886	Delta-1-pyrroline-5-carboxylate synthase	ALDH18A1	1	98.182	1	K	_VGMGGMEAK(ac)VK_	311	9	P54886_311	2	0.53504	0.73707	1.0119	0.728402	1	GMGGMEAKVKAALWA	20190613_HepG2_LPS_SILAC_KacIP_CID_120min_AS_1st-1	8801
P05141	ADP/ATP translocase 2	SLC25A5	1	161.25	1	K	_AFFK(ac)GAWSNVLR_	272	4	P05141_272	2	0.38223	0.77556	1.065	0.728225	10	EGGKAFFKGAWSNVL	20200603_LPS_SILAC_Kac_IP_Combine_120min	8679
P14618	Pyruvate kinase PKM	PKM	1	129.82	1	K	_(ac)SK(ac)PHSEAGTAFIQTQQLHAAMADTFLEHMCR_	3	2	P14618_3	4	-0.62472	0.65052	0.893515	0.728046	1	MSKPHSEAGT	20190709_HepG2_LPS_SILAC_KacIP_CID_120min_AS_1st	28806
O95954	Formimidoyltransferase-cyclodeaminase	FTCD	1	83.862	1	K	_LPK(ac)NTPEEK_	427	3	O95954_427	2	-1.604	0.67422	0.92618	0.727958	1	LEAMRLPKNTPEEKD	200719_HepG2_LPS_Kac_15cm_ExSen_2hr_ooo	3256
P68104	Elongation factor 1-alpha 1	EEF1A1	1	176.19	1	K	_QTVAVGVIK(ac)AVDK_	439	9	P68104_439	2	0.7868	0.79831	1.0973	0.727522	12	TVAVGVIKAVDKKAA	20200603_LPS_SILAC_Kac_IP_Combine_120min	5248
Q96PE7	Methylmalonyl-CoA epimerase, mitochondrial	MCEE	0.962236	83.423	1	K	_SLSEEVK(ac)IGAHGKPVIFLHPK_	150	7	Q96PE7_150	4	-0.25724	0.69485	0.95546	0.727241	1	RSLSEEVKIGAHGKP	20200603_LPS_SILAC_Kac_IP_Combine_120min	5326
P34897	Serine hydroxymethyltransferase, mitochondrial	SHMT2	1	179.69	1	K	_LNPK(ac)TGLIDYNQLALTAR_	200	4	P34897_200	3	0.00053596	0.78792	1.0846	0.726461	12	MPYKLNPKTGLIDYN	20190613_HepG2_LPS_SILAC_KacIP_CID_120min_AS_1st-1	24785
P38646	Stress-70 protein, mitochondrial	HSPA9	1	107.57	1	K	_HIVK(ac)EFK_	288	4	P38646_288	2	-1.1213	0.73755	1.01573	0.726128	3	ALLRHIVKEFKRETG	200719_HepG2_LPS_Kac_15cm_ExSen_2hr_ooo	3912
Q32Q12	Nucleoside diphosphate kinase	NME1-NME2	1	72.898	1	K	_FMQASEDLLK(ac)EHYVDLK_	74	10	Q32Q12_74	3	-0.11001	0.84825	1.16895	0.725651	2	QASEDLLKEHYVDLK	20190613_HepG2_LPS_SILAC_KacIP_CID_120min_AS_2nd-1	21239
P09622	Dihydrolipoyl dehydrogenase, mitochondrial	DLD	1	187.74	1	K	_ALTGGIAHLFK(ac)QNK_	143	11	P09622_143	2	-0.60629	0.70508	0.97184	0.72551	16	GGIAHLFKQNKVVHV	20190709_HepG2_LPS_SILAC_KacIP_CID_120min_AS_1st	17077
P40926	Malate dehydrogenase, mitochondrial	MDH2	1	158.91	1	K	_LTLYDIAHTPGVAADLSHIETK(ac)AAVK_	74	22	P40926_74	4	0.23598	0.67698	0.933245	0.725404	8	DLSHIETKAAVKGYL	20200603_LPS_SILAC_Kac_IP_Combine_120min	10239
O75874	Isocitrate dehydrogenase [NADP] cytoplasmic	IDH1	1	173.72	1	K	_FK(ac)DIFQEIYDKQYK_	224	2	O75874_224	3	0.30132	0.76884	1.06015	0.725218	14	KKYDGRFKDIFQEIY	20200603_LPS_SILAC_Kac_IP_Combine_120min	8977
P34897	Serine hydroxymethyltransferase, mitochondrial	SHMT2	1	311.95	1	K	_VLELVSITANK(ac)NTCPGDR_	409	11	P34897_409	2	-0.64623	0.78639	1.0846	0.725051	22	LVSITANKNTCPGDR	20190709_HepG2_LPS_SILAC_KacIP_CID_120min_AS_1st	20426
A0A0U1RQF0	3-hydroxyacyl-[acyl-carrier-protein] dehydratase	FASN	1	180.93	1	K	_DIM(ox)LATGK(ac)LSPDAIPGK_	1580	8	A0A0U1RQF0_1580	3	-0.16207	0.73723	1.0197	0.722987	30	DIMLATGKLSPDAIP	200719_HepG2_LPS_Kac_15cm_ExSen_2hr_ooo	14174
Q9NU22	Midasin	MDN1	1	121.41	1	K	_SGGK(ac)ELEGK_	3482	4	Q9NU22_3482	2	-0.28868	0.84423	1.16915	0.722089	1	ILKRSGGKELEGKGQ	200719_HepG2_LPS_Kac_15cm_ExSen_2hr_ooo	2559
P00505	Aspartate aminotransferase, mitochondrial	GOT2	1	55.755	1	K	_DVFLPK(ac)PTWGNHTPIFR_	159	6	P00505_159	3	-0.29232	0.76135	1.05453	0.72198	2	SRDVFLPKPTWGNHT	20190709_HepG2_LPS_SILAC_KacIP_CID_120min_AS_2nd	25223
B8ZZQ6	Prothymosin alpha	PTMA	1	271.64	1	K	_AAEDDEDDDVDTK(ac)K_	99	13	B8ZZQ6_99	2	0.17249	0.63558	0.881275	0.721205	2	EDDDVDTKKQKTDED	20200603_LPS_SILAC_Kac_IP_Combine_120min	1485
Q92793	CREB-binding protein	CREBBP	1	114.88	1	K	_TQPPTTVSTGK(ac)PTSQVPAPPPPAQPPPAAVEAAR_	1937	11	Q92793_1937	3	0.45432	0.68069	0.94392	0.721131	1	PTTVSTGKPTSQVPA	20190709_HepG2_LPS_SILAC_KacIP_CID_120min_AS_1st	18030
P21796	Voltage-dependent anion-selective channel protein 1	VDAC1	1	197.94	1	K	_FGIAAK(ac)YQIDPDACFSAK_	224	6	P21796_224	3	-1.0791	0.80751	1.1201	0.720927	15	TRFGIAAKYQIDPDA	20190709_HepG2_LPS_SILAC_KacIP_CID_120min_AS_3rd	23997
Q06830	Peroxiredoxin-1	PRDX1	1	212.03	1	K	_(ac)SSGNAK(ac)IGHPAPNFK_	7	6	Q06830_7	2	-1.5034	0.67382	0.93677	0.719301	11	MSSGNAKIGHPAPN	20190617_HepG2_LPS_SILAC_KacIP_CID_120min_AS_2nd	10436
B4DJV2	Citrate synthase	CS	1	146.36	1	K	_GFSIPECQK(ac)LLPK_	90	9	B4DJV2_90	2	-1.0856	0.69436	0.966915	0.718119	1	FSIPECQKLLPKAKG	20190709_HepG2_LPS_SILAC_KacIP_CID_120min_AS_1st	22221
H3BPG0	Cytochrome c oxidase subunit 4 isoform 1, mitochondrial	COX4I1	1	100.97	1	K	_DHPLPEVAHVK(ac)HLSASQK_	15	11	H3BPG0_15	4	0.010484	0.70657	0.98692	0.715934	3	LPEVAHVKHLSASQK	20200603_LPS_SILAC_Kac_IP_Combine_120min	2770
P06576	ATP synthase subunit beta, mitochondrial	ATP5F1B	1	128.66	1	K	_GQK(ac)VLDSGAPIKIPVGPETLGR_	124	3	P06576_124	3	-0.03161	0.68865	0.96249	0.715488	4	EGLVRGQKVLDSGAP	20200603_LPS_SILAC_Kac_IP_Combine_120min	7497
P07737	Profilin-1	PFN1	1	142.72	1	K	_STGGAPTFNVTVTK(ac)TDK_	105	14	P07737_105	2	0.11609	0.76255	1.067	0.714667	4	TFNVTVTKTDKTLVL	20190613_HepG2_LPS_SILAC_KacIP_CID_120min_AS_2nd-1	13005
Q99878	Histone H2A type 1-J	H2AC14	1	158.01	1	K	_NDEELNK(ac)LLGK_	96	7	Q99878_96	2	-0.26703	0.80377	1.125	0.714462	6	RNDEELNKLLGKVTI	20190617_HepG2_LPS_SILAC_KacIP_CID_120min_AS_2nd	18264
Q8N0X4	Citramalyl-CoA lyase, mitochondrial	CLYBL	1	75.819	1	K	_AVLYVPGNDEK(ac)K_	57	11	Q8N0X4_57	2	-0.18476	0.69116	0.97287	0.710434	1	YVPGNDEKKIKKIPS	200719_HepG2_LPS_Kac_15cm_ExSen_2hr_ooo	8073
Q9UQE7	Structural maintenance of chromosomes protein 3	SMC3	1	222.56	1;2	K	_VIGAK(ac)K(ac)DQYFLDK_	106	6	Q9UQE7_106	3	0.066733	0.80653	1.1356	0.710224	18	RRVIGAKKDQYFLDK	20190613_HepG2_LPS_SILAC_KacIP_CID_120min_AS_2nd-2	15119
Q9UQE7	Structural maintenance of chromosomes protein 3	SMC3	1	222.56	2	K	_VIGAK(ac)K(ac)DQYFLDK_	105	5	Q9UQE7_105	3	0.066733	0.80653	1.1356	0.710224	18	RRVIGAKKDQYFLDK	20190613_HepG2_LPS_SILAC_KacIP_CID_120min_AS_2nd-2	15119
P06576	ATP synthase subunit beta, mitochondrial	ATP5F1B	1	125.23	1	K	_ADK(ac)LAEEHSS_	522	3	P06576_522	2	-1.0301	0.68356	0.96249	0.7102	8	EAVAKADKLAEEHSS	20200603_LPS_SILAC_Kac_IP_Combine_120min	1239
P36578	60S ribosomal protein L4	RPL4	1	69.275	1	K	_M(ox)FAPTK(ac)TWR_	106	6	P36578_106	2	0.3418	0.76083	1.0722	0.709597	3	GRMFAPTKTWRRWHR	200719_HepG2_LPS_Kac_15cm_ExSen_2hr_ooo	8640
P31939	Bifunctional purine biosynthesis protein ATIC	ATIC	1	105.21	1	K	_EALGIPAAASFK(ac)HVSPAGAAVGIPLSEDEAK_	266	12	P31939_266	3	-0.01854	0.72072	1.01643	0.709066	8	IPAAASFKHVSPAGA	20200603_LPS_SILAC_Kac_IP_Combine_120min	9543
P61254	60S ribosomal protein L26	RPL26	1	92.051	1	K	_YK(ac)EETIEK_	136	2	P61254_136	2	0.71096	0.73514	1.0369	0.708979	1	GKEKGKYKEETIEKM	200719_HepG2_LPS_Kac_15cm_ExSen_2hr_ooo	3774
P07108	Acyl-CoA-binding protein	DBI	1	168.22	1	K	_AYINK(ac)VEELK_	77	5	P07108_77	2	0.89282	0.73685	1.04124	0.707666	6	AMKAYINKVEELKKK	20190613_HepG2_LPS_SILAC_KacIP_CID_120min_AS_2nd-1	13698
Q00610	Clathrin heavy chain 1	CLTC	1	80.752	1	K	_GQAGGK(ac)LHIIEVGTPPTGNQPFPK_	227	6	Q00610_227	3	-0.77732	0.7579	1.0711	0.70759	1	VRGQAGGKLHIIEVG	20190613_HepG2_LPS_SILAC_KacIP_CID_120min_AS_2nd-1	18823
P61604	10 kDa heat shock protein, mitochondrial	HSPE1	1	169.55	1	K	_GK(ac)GGEIQPVSVK_	56	2	P61604_56	2	-0.97728	0.74532	1.05356	0.707433	1	VGSGSKGKGGEIQPV	200719_HepG2_LPS_Kac_15cm_ExSen_2hr_ooo	5952
B4DK69	Aldo-keto reductase family 1 member C2	AKR1C2	1	128.51	1	K	_YQCVK(ac)LNDGHFM(ox)PVLGFGTYAPAEVPK_	9	5	B4DK69_9	3	-0.4969	0.69352	0.98144	0.706635	9	DSKYQCVKLNDGHFM	20200603_LPS_SILAC_Kac_IP_Combine_120min	9076
P30837	Aldehyde dehydrogenase X, mitochondrial	ALDH1B1	1	106.93	1	K	_GFFIK(ac)PTVFGGVQDDM(ox)R_	399	5	P30837_399	2	-0.11553	0.74269	1.05365	0.704874	1	GERGFFIKPTVFGGV	20200603_LPS_SILAC_Kac_IP_Combine_120min	9598
P05141	ADP/ATP translocase 2	SLC25A5	1	172.99	1	K	_DFLAGGVAAAISK(ac)TAVAPIER_	23	13	P05141_23	2	0.32103	0.7506	1.065	0.704789	8	GVAAAISKTAVAPIE	20190709_HepG2_LPS_SILAC_KacIP_CID_120min_AS_1st	32683
G3V4F2	Acyl-coenzyme A thioesterase 1	ACOT1	1	153.56	1	K	_RK(ac)PQIICYPETGHYIEPPYFPLCR_	323	2	G3V4F2_323	4	0.25148	0.69846	0.99149	0.704455	7	LQAHGRRKPQIICYP	20200603_LPS_SILAC_Kac_IP_Combine_120min	9643
A0A087WUT6	Eukaryotic translation initiation factor 5B	EIF5B	1	104.2	1	K	_K(ac)FEEETVK_	275	1	A0A087WUT6_275	2	0.77489	0.70943	1.00872	0.703301	1	KQKESQRKFEEETVK	200719_HepG2_LPS_Kac_15cm_ExSen_2hr_ooo	4505
P22307	Non-specific lipid-transfer protein	SCP2	1	195.72	1	K	_LEEEGEQFVK(ac)K_	453	10	P22307_453	2	1.1577	0.68021	0.968475	0.702352	9	EEGEQFVKKIGGIFA	20190617_HepG2_LPS_SILAC_KacIP_CID_120min_AS_1st	7570
P08238	Heat shock protein HSP 90-beta	HSP90AB1	1	98.044	1	K	_LM(ox)K(ac)EILDK_	568	3	P08238_568	2	-0.36204	0.6908	0.9839	0.702104	3	ENLCKLMKEILDKKV	20190709_HepG2_LPS_SILAC_KacIP_CID_120min_AS_1st	12883
Q9UKJ3	G patch domain-containing protein 8	GPATCH8	1	144.29	1	K	_LPPSLGNK(ac)PVLPLIGK_	1142	8	Q9UKJ3_1142	2	-0.12594	0.7377	1.0547	0.699441	5	LPPSLGNKPVLPLIG	20200603_LPS_SILAC_Kac_IP_Combine_120min	9113
P19338	Nucleolin	NCL	1	152.07	1	K	_TLLAK(ac)NLPYK_	398	5	P19338_398	2	0.75769	0.71142	1.01775	0.699013	10	DARTLLAKNLPYKVT	20200603_LPS_SILAC_Kac_IP_Combine_120min	5064
O00299	Chloride intracellular channel protein 1	CLIC1	0.999963	81.48	1	K	_KFLDGNELTLADCNLLPK(ac)LHIVQVVCK_	183	18	O00299_183	4	-0.29122	0.70251	1.00731	0.697412	4	ADCNLLPKLHIVQVV	20190709_HepG2_LPS_SILAC_KacIP_CID_120min_AS_1st	32318
P07108	Acyl-CoA-binding protein	DBI	1	223.87	1	K	_AK(ac)WDAWNELKGTSK_	55	2	P07108_55	2	0.011021	0.72389	1.04124	0.695219	11	LDFTGKAKWDAWNEL	20200603_LPS_SILAC_Kac_IP_Combine_120min	6915
F5H3C5	Superoxide dismutase	SOD2	1	217.67	1	K	_HHAAYVNNLNVTEEK(ac)YQEALAK_	22	15	F5H3C5_22	4	-0.57541	0.62562	0.90143	0.694031	23	NLNVTEEKYQEALAK	20200603_LPS_SILAC_Kac_IP_Combine_120min	5425
P06748	Nucleophosmin	NPM1	1	131.69	1;2	K	_SAPGGGSK(ac)VPQK(ac)K_	150	8	P06748_150	2	-0.071586	0.69266	0.998465	0.693725	11	GGSKVPQKKVKLAAD	20200603_LPS_SILAC_Kac_IP_Combine_120min	836
Q96G03	Phosphoglucomutase-2	PGM2	1	63.734	1	K	_TSGTEPK(ac)IK_	565	7	Q96G03_565	2	1.1745	0.8571	1.23581	0.69355	1	RTSGTEPKIKYYAEL	200719_HepG2_LPS_Kac_15cm_ExSen_2hr_ooo	2756
P68104	Elongation factor 1-alpha 1	EEF1A1	1	102.06	1	K	_FLK(ac)SGDAAIVDM(ox)VPGKPM(ox)CVESFSDYPPLGR_	395	3	P68104_395	3	0.11342	0.76002	1.0973	0.692627	7	EDGPKFLKSGDAAIV	20200603_LPS_SILAC_Kac_IP_Combine_120min	9242
P48047	ATP synthase subunit O, mitochondrial	ATP5PO	1	115.7	1	K	_QNK(ac)LEQVEK_	54	3	P48047_54	2	-0.57451	0.75028	1.08482	0.69162	1	SAASKQNKLEQVEKE	200719_HepG2_LPS_Kac_15cm_ExSen_2hr_ooo	5229
Q71DI3	Histone H3.2	H3C15	0.999731	101.32	1	K	_SAPATGGVK(ac)KPHR_	37	9	Q71DI3_37	2	0.72021	1.0382	1.5014	0.691488	4	APATGGVKKPHRYRP	20200603_LPS_SILAC_Kac_IP_Combine_120min	450
Q15067	Peroxisomal acyl-coenzyme A oxidase 1	ACOX1	1	78.69	1	K	_NSPLNK(ac)AEVHESYK_	643	6	Q15067_643	3	1.3605	0.71739	1.03896	0.690485	3	AKNSPLNKAEVHESY	200719_HepG2_LPS_Kac_15cm_ExSen_2hr_ooo	6398
P61604	10 kDa heat shock protein, mitochondrial	HSPE1	1	82.121	1	K	_GKGGEIQPVSVK(ac)VGDK_	66	12	P61604_66	3	-1.1393	0.72657	1.05356	0.689637	3	EIQPVSVKVGDKVLL	20190709_HepG2_LPS_SILAC_KacIP_CID_120min_AS_1st	8165
P40926	Malate dehydrogenase, mitochondrial	MDH2	1	211.77	1	K	_NLGIGK(ac)VSSFEEK_	307	6	P40926_307	2	0.080954	0.64301	0.933245	0.689004	9	EKNLGIGKVSSFEEK	20190709_HepG2_LPS_SILAC_KacIP_CID_120min_AS_1st	17616
A0A0U1RQF0	3-hydroxyacyl-[acyl-carrier-protein] dehydratase	FASN	1	112.24	1	K	_VAAAVDLIIK(ac)SHQGLDR_	2404	10	A0A0U1RQF0_2404	3	-0.051086	0.69992	1.0197	0.686398	10	AAVDLIIKSHQGLDR	20200603_LPS_SILAC_Kac_IP_Combine_120min	6800
Q9BWD1	Acetyl-CoA acetyltransferase, cytosolic	ACAT2	0.867323	87.017	1	K	_HGSNIEAM(ox)SK(ac)LKPYFLTDGTGTVTPANASGINDGAAAVVLM(ox)K_	233	10	Q9BWD1_233	4	-0.021145	0.6624	0.969235	0.683426	3	SNIEAMSKLKPYFLT	20190613_HepG2_LPS_SILAC_KacIP_CID_120min_AS_1st-1	29494
P00558	Phosphoglycerate kinase 1	PGK1	1	155.16	1	K	_SVVLM(ox)SHLGRPDGVPM(ox)PDK(ac)YSLEPVAVELK_	75	19	P00558_75	3	0.14325	0.6547	0.960415	0.681684	14	DGVPMPDKYSLEPVA	20190709_HepG2_LPS_SILAC_KacIP_CID_120min_AS_2nd	27124
P25705	ATP synthase subunit alpha, mitochondrial	ATP5F1A	1	201.09	1	K	_ISEQSDAK(ac)LK_	539	8	P25705_539	2	0.11942	0.65882	0.967645	0.680849	6	ISEQSDAKLKEIVTN	20200603_LPS_SILAC_Kac_IP_Combine_120min	1557
K7EME0	3-ketoacyl-CoA thiolase, mitochondrial	ACAA2	1	60.735	1	K	_QTMQVDEHARPQTTLEQLQK(ac)LPPVFK_	179	20	K7EME0_179	4	-0.92352	0.65125	0.95702	0.680498	3	TTLEQLQKLPPVFKK	20190617_HepG2_LPS_SILAC_KacIP_CID_120min_AS_1st	25603
A0A0C4DG07	Nibrin	NBN	1	149.44	1	K	_NYCDPQGHPSTGLK(ac)TTTPGPSLSQGVSVDEK_	252	14	A0A0C4DG07_252	3	-0.54415	0.71365	1.0498	0.679796	5	GHPSTGLKTTTPGPS	20200603_LPS_SILAC_Kac_IP_Combine_120min	5387
F8W6I7	Helix-destabilizing protein	HNRNPA1	1	214.58	1	K	_SSGPYGGGGQYFAK(ac)PR_	285	14	F8W6I7_285	3	-0.60378	0.93203	1.3714	0.679619	19	GGGQYFAKPRNQGGY	20190613_HepG2_LPS_SILAC_KacIP_CID_120min_AS_1st-1	11603
P23246	Splicing factor, proline- and glutamine-rich	SFPQ	0.999996	61.039	1	K	_MPGGPKPGGGPGLSTPGGHPK(ac)PPHR_	232	21	P23246_232	4	-0.14578	0.67807	0.998615	0.67901	1	STPGGHPKPPHRGGG	20200603_LPS_SILAC_Kac_IP_Combine_120min	1998
Q9Y617	Phosphoserine aminotransferase	PSAT1	1	50.077	1	K	_FGTINIVHPK(ac)LGSYTK_	127	10	Q9Y617_127	3	0.030494	0.82971	1.2222	0.678866	1	TINIVHPKLGSYTKI	20200603_LPS_SILAC_Kac_IP_Combine_120min	5975
P61604	10 kDa heat shock protein, mitochondrial	HSPE1	1	68.481	1	K	_VLQATVVAVGSGSK(ac)GK_	54	14	P61604_54	2	0.64764	0.7132	1.05356	0.676946	1	VAVGSGSKGKGGEIQ	200719_HepG2_LPS_Kac_15cm_ExSen_2hr_ooo	8307
Q9Y265	RuvB-like 1	RUVBL1	1	84.687	1	K	_ILADQQDK(ac)YM(ox)K_	453	8	Q9Y265_453	2	0.75509	0.69078	1.02215	0.675814	1	ILADQQDKYMK	200719_HepG2_LPS_Kac_15cm_ExSen_2hr_ooo	5964
P38646	Stress-70 protein, mitochondrial	HSPA9	1	126.5	1	K	_YDDPEVQK(ac)DIK_	135	8	P38646_135	2	-0.70502	0.68636	1.01573	0.675731	9	YDDPEVQKDIKNVPF	200719_HepG2_LPS_Kac_15cm_ExSen_2hr_ooo	7079
P38646	Stress-70 protein, mitochondrial	HSPA9	1	58.924	1	K	_ETAENYLGHTAK(ac)NAVITVPAYFNDSQR_	187	12	P38646_187	3	0.026386	0.68585	1.01573	0.675229	4	NYLGHTAKNAVITVP	20190617_HepG2_LPS_SILAC_KacIP_CID_120min_AS_1st	28880
O95081	Arf-GAP domain and FG repeat-containing protein 2	AGFG2	1	193.27	1	K	_GSASTPVQGSIPEGK(ac)PLR_	173	15	O95081_173	2	0.43357	0.6105	0.90417	0.675205	10	QGSIPEGKPLRTLLG	20190617_HepG2_LPS_SILAC_KacIP_CID_120min_AS_2nd	14017
P48047	ATP synthase subunit O, mitochondrial	ATP5PO	1	186.77	1	K	_SFLSQGQVLK(ac)LEAK_	172	10	P48047_172	2	0.43536	0.73222	1.08482	0.674972	5	LSQGQVLKLEAKTDP	20190617_HepG2_LPS_SILAC_KacIP_CID_120min_AS_1st	22917
P06733	Alpha-enolase	ENO1	1	107.53	1	K	_EGLELLK(ac)TAIGK_	228	7	P06733_228	2	0.014192	0.59288	0.8785	0.674878	1	KEGLELLKTAIGKAG	20200603_LPS_SILAC_Kac_IP_Combine_120min	8381
E7EPB3	60S ribosomal protein L14	RPL14	1	160.56	1	K	_ADINTK(ac)WAATR_	85	6	E7EPB3_85	2	-3.3541	1.0011	1.4849	0.674187	4	QKADINTKWAATRWA	20190709_HepG2_LPS_SILAC_KacIP_CID_120min_AS_2nd	10990
P40926	Malate dehydrogenase, mitochondrial	MDH2	1	81.992	1	K	_M(ox)ISDAIPELK(ac)ASIK_	324	10	P40926_324	2	-0.50326	0.62787	0.933245	0.672782	2	SDAIPELKASIKKGE	20200603_LPS_SILAC_Kac_IP_Combine_120min	7980
Q15274	Nicotinate-nucleotide pyrophosphorylase [carboxylating]	QPRT	1	66.692	1	K	_EVAPVPK(ac)IH_	295	7	Q15274_295	2	-0.54219	0.76444	1.1384	0.671504	1	KEVAPVPKIH	200719_HepG2_LPS_Kac_15cm_ExSen_2hr_ooo	7547
P10809	60 kDa heat shock protein, mitochondrial	HSPD1	1	181.86	1	K	_K(ac)ISSIQSIVPALEIANAHR_	250	1	P10809_250	3	0.34618	0.64099	0.954885	0.671275	5	YVLLSEKKISSIQSI	20190709_HepG2_LPS_SILAC_KacIP_CID_120min_AS_2nd	23881
A0A0B4J1R6	Transketolase	TKT	1	109.1	1	K	_GITGVEDKESWHGK(ac)PLPK_	94	14	A0A0B4J1R6_94	3	-1.6689	0.65093	0.97232	0.669461	1	DKESWHGKPLPKNMA	20190709_HepG2_LPS_SILAC_KacIP_CID_120min_AS_1st	12430
A8MW49	Fatty acid-binding protein 1	FABP1	1	118.61	1	K	_AIGLPEELIQK(ac)GK_	31	11	A8MW49_31	2	-0.083508	0.68122	1.0273	0.663117	8	LPEELIQKGKDIKGV	20190613_HepG2_LPS_SILAC_KacIP_CID_120min_AS_1st-2	18976
E5RFP6	Voltage-dependent anion-selective channel protein 3	VDAC3	1	298.91	1	K	_YK(ac)VCNYGLTFTQK_	64	2	E5RFP6_64	2	0.18015	0.75837	1.1473	0.661004	12	GNLETKYKVCNYGLT	20190709_HepG2_LPS_SILAC_KacIP_CID_120min_AS_1st	18208
P06748	Nucleophosmin	NPM1	1	109.19	1	K	_TVSLGAGAK(ac)DELHIVEAEAMNYEGSPIK_	54	9	P06748_54	3	0.14998	0.65883	0.998465	0.659843	2	VSLGAGAKDELHIVE	20190709_HepG2_LPS_SILAC_KacIP_CID_120min_AS_1st	32842
P28288	ATP-binding cassette sub-family D member 3	ABCD3	1	179.74	1	K	_HLK(ac)STHSELLEDYYQSGR_	347	3	P28288_347	3	-0.47158	0.63457	0.962445	0.659331	5	LSHPRHLKSTHSELL	20190709_HepG2_LPS_SILAC_KacIP_CID_120min_AS_2nd	11808
A0A0C4DGA2	Enoyl-CoA delta isomerase 2, mitochondrial	ECI2	1	162.36	1	K	_KDPGNEVK(ac)LK_	32	8	A0A0C4DGA2_32	2	0.45789	0.65387	0.99368	0.658029	10	KDPGNEVKLKLYALY	20200603_LPS_SILAC_Kac_IP_Combine_120min	1815
E9PMA0	Apoptosis-inducing factor 1, mitochondrial	AIFM1	1	44.391	1	K	_IIK(ac)DGEQHEDLNEVAK_	254	3	E9PMA0_254	3	0.93046	0.593	0.90121	0.658004	1	PIARKIIKDGEQHED	200719_HepG2_LPS_Kac_15cm_ExSen_2hr_ooo	6511
P08133	Annexin A6	ANXA6	1	94.692	2	K	_AK(ac)PAQGAK(ac)YR_	3	2	P08133_3	2	1.0415	0.73492	1.11805	0.657323	1	MAKPAQGAKY	200719_HepG2_LPS_Kac_15cm_ExSen_2hr_ooo	3176
P08133	Annexin A6	ANXA6	1	94.692	2	K	_AK(ac)PAQGAK(ac)YR_	9	8	P08133_9	2	1.0415	0.73492	1.11805	0.657323	1	MAKPAQGAKY	200719_HepG2_LPS_Kac_15cm_ExSen_2hr_ooo	3176
P0DMV9	Heat shock 70 kDa protein 1B	HSPA1B	1	44.312	1	K	_(ac)AK(ac)AAAIGIDLGTTYSCVGVFQHGK_	3	2	P0DMV9_3	3	-0.63951	0.75505	1.1506	0.656223	1	MAKAAAIGID	20190709_HepG2_LPS_SILAC_KacIP_CID_120min_AS_1st	32406
P06748	Nucleophosmin	NPM1	0.98203	66.702	1	K	_ADK(ac)DYHFKVDNDENEHQLSLR_	27	3	P06748_27	5	-0.76894	0.65479	0.998465	0.655797	4	GCELKADKDYHFKVD	20200603_LPS_SILAC_Kac_IP_Combine_120min	3821
P04075	Fructose-bisphosphate aldolase A	ALDOA	1	206.47	1	K	_ALSDHHIYLEGTLLK(ac)PNM(ox)VTPGHACTQK_	230	15	P04075_230	3	0.44948	0.59647	0.911145	0.654638	37	YLEGTLLKPNMVTPG	20200603_LPS_SILAC_Kac_IP_Combine_120min	5729
P40926	Malate dehydrogenase, mitochondrial	MDH2	1	102.89	1	K	_AAVK(ac)GYLGPEQLPDCLK_	78	4	P40926_78	2	-0.0065962	0.61052	0.933245	0.65419	2	IETKAAVKGYLGPEQ	20190709_HepG2_LPS_SILAC_KacIP_CID_120min_AS_1st	21936
O75947	ATP synthase subunit d, mitochondrial	ATP5PD	1	110.64	1	K	_VPVPEDK(ac)YTAQVDAEEKEDVK_	85	7	O75947_85	3	0.77524	0.52084	0.79708	0.653435	2	KVPVPEDKYTAQVDA	20200603_LPS_SILAC_Kac_IP_Combine_120min	4982
P07900	Heat shock protein HSP 90-alpha	HSP90AA1	1	91.867	1	K	_IMK(ac)DILEK_	576	3	P07900_576	2	-0.36204	0.6908	1.0581	0.652868	3	ENLCKIMKDILEKKV	20190709_HepG2_LPS_SILAC_KacIP_CID_120min_AS_1st	12927
Q32Q12	Nucleoside diphosphate kinase	NME1-NME2	1	224.06	1	K	_NIIHGSDSVK(ac)SAEK_	264	10	Q32Q12_264	2	-0.42009	0.76181	1.16895	0.651705	22	IHGSDSVKSAEKEIS	20200603_LPS_SILAC_Kac_IP_Combine_120min	1670
P49411	Elongation factor Tu, mitochondrial	TUFM	0.998555	62.081	1	K	_GLVMVKPGSIK(ac)PHQK_	347	11	P49411_347	4	-0.37431	0.63428	0.97354	0.651519	3	MVKPGSIKPHQKVEA	20190709_HepG2_LPS_SILAC_KacIP_CID_120min_AS_1st	9647
Q15067	Peroxisomal acyl-coenzyme A oxidase 1	ACOX1	1	217.79	1	K	_YAQVKPDGTYVK(ac)PLSNK_	267	12	Q15067_267	3	1.1416	0.6764	1.03896	0.651033	5	KPDGTYVKPLSNKLT	20200603_LPS_SILAC_Kac_IP_Combine_120min	3443
P40939	Trifunctional enzyme subunit alpha, mitochondrial	HADHA	1	159.26	1	K	_K(ac)M(ox)GLVDQLVEPLGPGLKPPEER_	214	1	P40939_214	3	0.29689	0.63378	0.977645	0.648272	5	IRADRAKKMGLVDQL	20200603_LPS_SILAC_Kac_IP_Combine_120min	8346
P38646	Stress-70 protein, mitochondrial	HSPA9	1	210.67	1	K	_M(ox)EEFK(ac)DQLPADECNK_	600	5	P38646_600	2	0.20456	0.6584	1.01573	0.648204	5	ETKMEEFKDQLPADE	20190613_HepG2_LPS_SILAC_KacIP_CID_120min_AS_1st-1	13028
P30048	Thioredoxin-dependent peroxide reductase, mitochondrial	PRDX3	1	160.77	1	K	_DLSLDDFK(ac)GK_	91	8	P30048_91	2	0.53153	0.6988	1.08025	0.646887	1	DLSLDDFKGKYLVLF	20190613_HepG2_LPS_SILAC_KacIP_CID_120min_AS_1st-1	18234
P09622	Dihydrolipoyl dehydrogenase, mitochondrial	DLD	1	128.95	1	K	_AK(ac)TNADTDGM(ox)VK_	430	2	P09622_430	2	-1.1625	0.62434	0.97184	0.642431	2	FAANSRAKTNADTDG	200719_HepG2_LPS_Kac_15cm_ExSen_2hr_ooo	2416
O60701	UDP-glucose 6-dehydrogenase	UGDH	1	134.61	1	K	_AADLK(ac)YIEACAR_	107	5	O60701_107	2	0.84207	0.6513	1.01913	0.639075	5	KGRAADLKYIEACAR	20190709_HepG2_LPS_SILAC_KacIP_CID_120min_AS_1st	16112
P62424	60S ribosomal protein L7a	RPL7A	1	65.234	1	K	_QTATQLLK(ac)LAHK_	97	8	P62424_97	3	0.43895	0.68732	1.0783	0.637411	1	QTATQLLKLAHKYRP	20190709_HepG2_LPS_SILAC_KacIP_CID_120min_AS_1st	13027
P08621	U1 small nuclear ribonucleoprotein 70 kDa	SNRNP70	1	50.305	1	K	_DPIPYLPPLEK(ac)LPHEK_	27	11	P08621_27	3	-1.0607	0.62026	0.97557	0.635792	1	PYLPPLEKLPHEKHH	20190613_HepG2_LPS_SILAC_KacIP_CID_120min_AS_2nd-2	22053
Q15067	Peroxisomal acyl-coenzyme A oxidase 1	ACOX1	0.998769	85.988	1	K	_YAQVK(ac)PDGTYVKPLSNK_	260	5	Q15067_260	3	-1.4355	0.66055	1.03896	0.635777	1	LMKYAQVKPDGTYVK	20190709_HepG2_LPS_SILAC_KacIP_CID_120min_AS_1st	11652
Q32Q12	Nucleoside diphosphate kinase	NME1-NME2	1	130.27	1	K	_SAEK(ac)EISLWFKPEELVDYK_	268	4	Q32Q12_268	3	0.43851	0.74158	1.16895	0.634398	3	DSVKSAEKEISLWFK	20200603_LPS_SILAC_Kac_IP_Combine_120min	10462
P22307	Non-specific lipid-transfer protein	SCP2	1	171.67	1	K	_ANLVFK(ac)EIEK_	438	6	P22307_438	2	-0.78485	0.6132	0.968475	0.63316	10	FKANLVFKEIEKKLE	20200603_LPS_SILAC_Kac_IP_Combine_120min	5417
P00338	L-lactate dehydrogenase A chain	LDHA	0.99332	113.4	1	K	_TLHPDLGTDK(ac)DKEQWK_	222	10	P00338_222	4	0.13704	0.63865	1.01261	0.630697	2	HPDLGTDKDKEQWKE	20200603_LPS_SILAC_Kac_IP_Combine_120min	3036
P07237	Protein disulfide-isomerase	P4HB	1	123.4	1	K	_VLVGK(ac)NFEDVAFDEK_	375	5	P07237_375	2	0.48413	0.61858	0.983695	0.628833	3	PVKVLVGKNFEDVAF	20200603_LPS_SILAC_Kac_IP_Combine_120min	7686
P21796	Voltage-dependent anion-selective channel protein 1	VDAC1	1	113.34	1	K	_YQIDPDACFSAK(ac)VNNSSLIGLGYTQTLKPGIK_	236	12	P21796_236	3	0.1552	0.70321	1.1201	0.62781	12	PDACFSAKVNNSSLI	20200603_LPS_SILAC_Kac_IP_Combine_120min	10474
P11413	Glucose-6-phosphate 1-dehydrogenase	G6PD	1	110.38	1	K	_QSEPFFK(ac)ATPEEK_	89	7	P11413_89	2	0.47829	0.65325	1.0466	0.624164	1	KQSEPFFKATPEEKL	200719_HepG2_LPS_Kac_15cm_ExSen_2hr_ooo	9667
P00505	Aspartate aminotransferase, mitochondrial	GOT2	1	70.089		K	_LIK(ac)EFSIYM(ox)TK_	396	3	P00505_396	2	1.7546	0.6543	1.05453	0.620466	1	EQVERLIKEFSIYMT	200719_HepG2_LPS_Kac_15cm_ExSen_2hr_ooo	12534
Q9Y617	Phosphoserine aminotransferase	PSAT1	1	76.329	1	K	_QVVNFGPGPAK(ac)LPHSVLLEIQK_	16	11	Q9Y617_16	3	0.26529	0.75694	1.2222	0.619326	2	NFGPGPAKLPHSVLL	20190709_HepG2_LPS_SILAC_KacIP_CID_120min_AS_3rd	25425
P40939	Trifunctional enzyme subunit alpha, mitochondrial	HADHA	1	70.145	1	K	_EVEAVIPDHCIFASNTSALPISEIAAVSK(ac)RPEK_	489	29	P40939_489	4	-0.37001	0.6034	0.977645	0.617197	4	SEIAAVSKRPEKVIG	20190613_HepG2_LPS_SILAC_KacIP_CID_120min_AS_2nd-1	27388
Q71UI9	Histone H2A.V	H2AZ2	1	157.97	2	K	_AGK(ac)DSGK(ac)AK_	12	7	Q71UI9_12	2	0.38884	0.81645	1.33935	0.609587	10	MAGGKAGKDSGKAKA	20190709_HepG2_LPS_SILAC_KacIP_CID_120min_AS_3rd	614
P30101	Protein disulfide-isomerase A3	PDIA3	1	72.317	1	K	_K(ac)FIQENIFGICPHMTEDNKDLIQGK_	234	1	P30101_234	4	0.19125	0.5848	0.960995	0.608536	1	MTSGKIKKFIQENIF	20190709_HepG2_LPS_SILAC_KacIP_CID_120min_AS_2nd	23326
O00232	26S proteasome non-ATPase regulatory subunit 12	PSMD12	1	57.175	1	K	_FFQEENTEK(ac)LK_	221	9	O00232_221	2	0.78634	0.64347	1.06595	0.603659	1	FQEENTEKLKLKYYN	200719_HepG2_LPS_Kac_15cm_ExSen_2hr_ooo	8429
P80404	4-aminobutyrate aminotransferase, mitochondrial	ABAT	1	95.365	1	K	_K(ac)HGCAFLVDEVQTGGGCTGK_	318	1	P80404_318	3	0.77907	0.57705	0.96826	0.595966	1	KLRDIARKHGCAFLV	20190709_HepG2_LPS_SILAC_KacIP_CID_120min_AS_1st	13830
F8W6I7	Helix-destabilizing protein	HNRNPA1	1	108.66	2	K	_SK(ac)SESPK(ac)EPEQLR_	8	7	F8W6I7_8	2	-0.24831	0.81589	1.3714	0.594932	9	MSKSESPKEP	20200603_LPS_SILAC_Kac_IP_Combine_120min	2248
F8W6I7	Helix-destabilizing protein	HNRNPA1	1	98.592		K	_EDSQRPGAHLTVK(ac)K_	105	13	F8W6I7_105	3	0.075123	0.81555	1.3714	0.594684	1	PGAHLTVKKIFVGGI	20190617_HepG2_LPS_SILAC_KacIP_CID_120min_AS_1st	2929
P36578	60S ribosomal protein L4	RPL4	1	90.707	1	K	_AAAAAAALQAK(ac)SDEK_	364	11	P36578_364	2	-0.29119	0.63633	1.0722	0.593481	2	AAAALQAKSDEKAAV	200719_HepG2_LPS_Kac_15cm_ExSen_2hr_ooo	6612
P04406	Glyceraldehyde-3-phosphate dehydrogenase	GAPDH	1	69.485	1	K	_LVINGNPITIFQERDPSK(ac)IK_	84	18	P04406_84	3	-0.78335	0.58453	0.98917	0.59093	3	FQERDPSKIKWGDAG	20190709_HepG2_LPS_SILAC_KacIP_CID_120min_AS_3rd	24017
Q9Y617	Phosphoserine aminotransferase	PSAT1	0.973241	94.281	1	K	_CADYVVTGAWSAK(ac)AAEEAKK_	110	13	Q9Y617_110	3	-0.85943	0.72139	1.2222	0.590239	2	VTGAWSAKAAEEAKK	20190709_HepG2_LPS_SILAC_KacIP_CID_120min_AS_1st	18391
P05783	Keratin, type I cytoskeletal 18	KRT18	1	176.42	1	K	_IVDGK(ac)VVSETNDTK_	417	5	P05783_417	2	0.6374	0.66829	1.1397	0.586374	2	TRRIVDGKVVSETND	20190613_HepG2_LPS_SILAC_KacIP_CID_120min_AS_1st-1	6871
A0A0C4DGA2	Enoyl-CoA delta isomerase 2, mitochondrial	ECI2	1	65.151	1	K	_ATFHTPFSHLGQSPEGCSSYTFPK(ac)IMSPAK_	259	24	A0A0C4DGA2_259	4	0.11794	0.58258	0.99368	0.586285	2	CSSYTFPKIMSPAKA	20190709_HepG2_LPS_SILAC_KacIP_CID_120min_AS_1st	24606
P00338	L-lactate dehydrogenase A chain	LDHA	1	160.18	1	K	_FIIPNVVK(ac)YSPNCK_	126	8	P00338_126	3	-0.053751	0.5925	1.01261	0.585122	14	FIIPNVVKYSPNCKL	20200603_LPS_SILAC_Kac_IP_Combine_120min	7848
Q15067	Peroxisomal acyl-coenzyme A oxidase 1	ACOX1	1	155.92	1	K	_EIGTHK(ac)PLPGITVGDIGPK_	216	6	Q15067_216	3	0.32178	0.60613	1.03896	0.583398	4	IREIGTHKPLPGITV	20190709_HepG2_LPS_SILAC_KacIP_CID_120min_AS_1st	19481
A0A0A0MR02	Outer mitochondrial membrane protein porin 2	VDAC2	1	241.41	1	K	_YK(ac)WCEYGLTFTEK_	74	2	A0A0A0MR02_74	2	0.58454	0.74384	1.2804	0.580943	11	GTLETKYKWCEYGLT	20190709_HepG2_LPS_SILAC_KacIP_CID_120min_AS_1st	24335
P08559	Pyruvate dehydrogenase E1 component subunit alpha, somatic form, mitochondrial	PDHA1	1	110.93	1	K	_SK(ac)SDPIMLLK_	313	2	P08559_313	2	-0.15846	0.63181	1.08857	0.580406	2	EIQEVRSKSDPIMLL	20190709_HepG2_LPS_SILAC_KacIP_CID_120min_AS_1st	18004
P35914	Hydroxymethylglutaryl-CoA lyase, mitochondrial	HMGCL	1	75.998	1	K	_WVPQMGDHTEVLK(ac)GIQK_	93	13	P35914_93	3	-0.28921	0.51296	0.88979	0.576496	4	GDHTEVLKGIQKFPG	20190613_HepG2_LPS_SILAC_KacIP_CID_120min_AS_1st-1	17306
O75874	Isocitrate dehydrogenase [NADP] cytoplasmic	IDH1	0.99783	44.998	1	K	_DATNDQVTK(ac)DAAEAIKK_	58	9	O75874_58	3	0.089451	0.60614	1.06015	0.571749	1	ATNDQVTKDAAEAIK	200719_HepG2_LPS_Kac_15cm_ExSen_2hr_ooo	7852
Q01082	Spectrin beta chain, non-erythrocytic 1	SPTBN1	0.994617	54.281	1	K	_LQAAYAGDK(ac)ADDIQKR_	1878	9	Q01082_1878	3	-0.38821	0.58858	1.03905	0.56646	1	QAAYAGDKADDIQKR	200719_HepG2_LPS_Kac_15cm_ExSen_2hr_ooo	6601
Q15067	Peroxisomal acyl-coenzyme A oxidase 1	ACOX1	1	96.756	1	K	_GK(ac)CYGLHAFIVPIR_	198	2	Q15067_198	3	-0.093457	0.58677	1.03896	0.564764	3	AQLITKGKCYGLHAF	20200603_LPS_SILAC_Kac_IP_Combine_120min	6797
P21796	Voltage-dependent anion-selective channel protein 1	VDAC1	1	187.74	1	K	_DVFTK(ac)GYGFGLIK_	20	5	P21796_20	2	-0.19296	0.63204	1.1201	0.564271	2	SARDVFTKGYGFGLI	20190709_HepG2_LPS_SILAC_KacIP_CID_120min_AS_1st	28371
P38646	Stress-70 protein, mitochondrial	HSPA9	1	109.48	1	K	_LK(ac)EEISK_	612	2	P38646_612	2	0.92659	0.57025	1.01573	0.561419	1	ADECNKLKEEISKMR	20190617_HepG2_LPS_SILAC_KacIP_CID_120min_AS_1st	3500
P08559	Pyruvate dehydrogenase E1 component subunit alpha, somatic form, mitochondrial	PDHA1	1	158.3	1	K	_M(ox)ELK(ac)ADQLYK_	77	4	P08559_77	2	1.3047	0.60622	1.08857	0.556898	5	TVRRMELKADQLYKQ	20190613_HepG2_LPS_SILAC_KacIP_CID_120min_AS_1st-2	8838
P43155	Carnitine O-acetyltransferase	CRAT	1	134.83	1	K	_IWNSSLQTNK(ac)EPVGILTSNHR_	245	10	P43155_245	3	0.29207	0.4983	0.89897	0.554301	1	NSSLQTNKEPVGILT	20190617_HepG2_LPS_SILAC_KacIP_CID_120min_AS_1st	21864
P07900	Heat shock protein HSP 90-alpha	HSP90AA1	1	215.72	1	K	_EK(ac)YIDQEELNK_	283	2	P07900_283	2	-0.024029	0.57832	1.0581	0.546565	6	KKKKIKEKYIDQEEL	20190617_HepG2_LPS_SILAC_KacIP_CID_120min_AS_1st	9546
C9JKQ2	Complex I-B12	NDUFB3	1	71.176	1	K	_IEGTPLETIQK(ac)K_	34	11	C9JKQ2_34	2	0.13774	0.54962	1.00708	0.545756	2	TPLETIQKKLAAKGL	200719_HepG2_LPS_Kac_15cm_ExSen_2hr_ooo	9215
Q15067	Peroxisomal acyl-coenzyme A oxidase 1	ACOX1	1	151.79	1	K	_LVEIAAK(ac)NLQK_	500	7	Q15067_500	2	0.4562	0.56608	1.03896	0.54485	7	RLVEIAAKNLQKEVI	20200603_LPS_SILAC_Kac_IP_Combine_120min	3929
Q14978	Nucleolar and coiled-body phosphoprotein 1	NOLC1	0.999949	99.711	1	K	_VAGGAAPSKPASAK(ac)K_	510	14	Q14978_510	2	-0.071064	0.53039	0.97724	0.542743	1	PSKPASAKKGKAESS	20200603_LPS_SILAC_Kac_IP_Combine_120min	515
P84077	ADP-ribosylation factor 1	ARF1	1	83.251	1	K	_QDLPNAMNAAEITDK(ac)LGLHSLR_	142	15	P84077_142	3	0.1663	0.73484	1.35685	0.541578	1	NAAEITDKLGLHSLR	20190709_HepG2_LPS_SILAC_KacIP_CID_120min_AS_1st	29205
P08559	Pyruvate dehydrogenase E1 component subunit alpha, somatic form, mitochondrial	PDHA1	1	65.184	1	K	_M(ox)VNSNLASVEELK(ac)EIDVEVRK_	336	13	P08559_336	3	-0.35749	0.58699	1.08857	0.539233	1	LASVEELKEIDVEVR	200719_HepG2_LPS_Kac_15cm_ExSen_2hr_ooo	14968
P45954	Short/branched chain specific acyl-CoA dehydrogenase, mitochondrial	ACADSB	1	210.79	1	K	_VPEANILGQIGHGYK(ac)YAIGSLNEGR_	284	15	P45954_284	3	-0.18143	0.55329	1.038	0.533035	11	GQIGHGYKYAIGSLN	20200603_LPS_SILAC_Kac_IP_Combine_120min	10132
P51659	Peroxisomal multifunctional enzyme type 2	HSD17B4	1	97.779	1	K	_LKDIGPEVVK(ac)K_	644	10	P51659_644	3	0.010272	0.45949	0.86474	0.531362	5	DIGPEVVKKVNAVFE	20190709_HepG2_LPS_SILAC_KacIP_CID_120min_AS_2nd	7467
P09972	Fructose-bisphosphate aldolase C	ALDOC	1	50.285	1	K	_VDK(ac)GVVPLAGTDGETTTQGLDGLSER_	111	3	P09972_111	3	0.72492	0.66517	1.2612	0.52741	2	VVGIKVDKGVVPLAG	20190709_HepG2_LPS_SILAC_KacIP_CID_120min_AS_3rd	22713
P35914	Hydroxymethylglutaryl-CoA lyase, mitochondrial	HMGCL	1	262.83	1	K	_DGLQNEK(ac)NIVSTPVK_	48	7	P35914_48	2	0.43685	0.46345	0.88979	0.520853	11	RDGLQNEKNIVSTPV	20190613_HepG2_LPS_SILAC_KacIP_CID_120min_AS_2nd-1	14599
P09622	Dihydrolipoyl dehydrogenase, mitochondrial	DLD	1	138.55	1	K	_AAQLGFK(ac)TVCIEK_	66	7	P09622_66	2	1.394	0.501	0.97184	0.515517	1	KAAQLGFKTVCIEKN	20190613_HepG2_LPS_SILAC_KacIP_CID_120min_AS_1st-2	15228
P48047	ATP synthase subunit O, mitochondrial	ATP5PO	1	89.171	1	K	_VAQILK(ac)EPK_	70	6	P48047_70	2	-0.59417	0.54773	1.08482	0.504906	1	LRVAQILKEPKVAAS	20200603_LPS_SILAC_Kac_IP_Combine_120min	2359
A0A0A0MR02	Outer mitochondrial membrane protein porin 2	VDAC2	1	112.39	1	K	_YQLDPTASISAK(ac)VNNSSLIGVGYTQTLRPGVK_	247	12	A0A0A0MR02_247	4	-0.4355	0.62356	1.2804	0.487004	2	PTASISAKVNNSSLI	20190709_HepG2_LPS_SILAC_KacIP_CID_120min_AS_1st	29508
E5RFP6	Voltage-dependent anion-selective channel protein 3	VDAC3	0.999942	57.708	1	K	_LAEGLK(ac)LTLDTIFVPNTGKK_	97	6	E5RFP6_97	3	0.24609	0.53943	1.1473	0.470173	1	NKLAEGLKLTLDTIF	20190709_HepG2_LPS_SILAC_KacIP_CID_120min_AS_1st	30903
F8VQ14	CCT-beta	CCT2	1	126.29	1	K	_K(ac)LGGSLADSYLDEGFLLDKK_	204	1	F8VQ14_204	3	0.76555	0.46485	1.0334	0.449826	1	EAIHIIKKLGGSLAD	20190709_HepG2_LPS_SILAC_KacIP_CID_120min_AS_1st	26953
Q71UI9	Histone H2A.V	H2AZ2	1	48.907	1	K	_ATIAGGGVIPHIHK(ac)SLIGK_	116	14	Q71UI9_116	4	-0.71458	0.5752	1.33935	0.429462	1	GVIPHIHKSLIGKKG	20190613_HepG2_LPS_SILAC_KacIP_CID_120min_AS_1st-1	15389
A0A0C4DGA2	Enoyl-CoA delta isomerase 2, mitochondrial	ECI2	0.998913	73.688	1	K	_QATEGPCNMPKPGVFDLINK(ac)AK_	60	20	A0A0C4DGA2_60	3	0.15739	0.38951	0.99368	0.391987	1	GVFDLINKAKWDAWN	20190709_HepG2_LPS_SILAC_KacIP_CID_120min_AS_1st	23035
Q96L91	E1A-binding protein p400	EP400	1	86.136	1	K	_ALNLQK(ac)VSR_	908	6	Q96L91_908	2	0.045832	0.22361	0.84511	0.264593	3	KKALNLQKVSRRGKE	20190617_HepG2_LPS_SILAC_KacIP_CID_120min_AS_1st	16606
